# Supplementary material for: The Developmental Mechanism of the Root System of Cultivated Terrestrial Watercress
Source: Plants (Basel). 2023 Oct 10;12(20):3523. doi: 10.3390/plants12203523 (PMC10610301; doi:10.3390/plants12203523)
Supplement: Supplementary file 1 [file plants-12-03523-s001.zip › Table S2_GO_enrichment.xlsx]

## Sheet: Sheet1
Category	GO.ID	Term	Up	Down	DEG	Total	Pvalue	FDR	Up_list	Down_list
MF	GO:0003735	structural constituent of ribosome	11	443	454	1055	< 1e-30	1.556e-27	TRINITY_DN10167_c0_g1,TRINITY_DN11090_c1_g1,TRINITY_DN12102_c0_g1,TRINITY_DN12102_c0_g2,TRINITY_DN12272_c1_g1,TRINITY_DN13433_c1_g3,TRINITY_DN21080_c1_g1,TRINITY_DN35464_c0_g1,TRINITY_DN6901_c0_g1,TRINITY_DN8617_c0_g1,TRINITY_DN8645_c0_g2	TRINITY_DN100728_c0_g1,TRINITY_DN100824_c0_g1,TRINITY_DN100860_c0_g1,TRINITY_DN100883_c0_g1,TRINITY_DN100983_c0_g1,TRINITY_DN101058_c0_g1,TRINITY_DN101175_c0_g1,TRINITY_DN10135_c0_g2,TRINITY_DN101503_c0_g1,TRINITY_DN101614_c0_g1,TRINITY_DN101686_c0_g1,TRINITY_DN102153_c0_g1,TRINITY_DN102475_c0_g1,TRINITY_DN10294_c3_g1,TRINITY_DN103490_c0_g1,TRINITY_DN103539_c0_g1,TRINITY_DN104072_c0_g1,TRINITY_DN…
MF	GO:0005198	structural molecule activity	16	497	513	1357	< 1e-30	1.556e-27	TRINITY_DN10167_c0_g1,TRINITY_DN11090_c1_g1,TRINITY_DN12102_c0_g1,TRINITY_DN12102_c0_g2,TRINITY_DN12272_c1_g1,TRINITY_DN13433_c1_g3,TRINITY_DN18415_c0_g1,TRINITY_DN21080_c1_g1,TRINITY_DN35464_c0_g1,TRINITY_DN43596_c0_g1,TRINITY_DN64447_c0_g1,TRINITY_DN6901_c0_g1,TRINITY_DN7843_c0_g1,TRINITY_DN8617_c0_g1,TRINITY_DN8645_c0_g2,TRINITY_DN954_c1_g2	TRINITY_DN100009_c0_g1,TRINITY_DN10031_c1_g1,TRINITY_DN100468_c0_g1,TRINITY_DN100728_c0_g1,TRINITY_DN100824_c0_g1,TRINITY_DN100860_c0_g1,TRINITY_DN100883_c0_g1,TRINITY_DN100983_c0_g1,TRINITY_DN101058_c0_g1,TRINITY_DN101175_c0_g1,TRINITY_DN10135_c0_g2,TRINITY_DN101503_c0_g1,TRINITY_DN101614_c0_g1,TRINITY_DN101686_c0_g1,TRINITY_DN102153_c0_g1,TRINITY_DN102475_c0_g1,TRINITY_DN10294_c3_g1,TRINITY_DN1…
CC	GO:0005840	ribosome	21	496	517	1205	< 1e-30	1.556e-27	TRINITY_DN10167_c0_g1,TRINITY_DN11090_c1_g1,TRINITY_DN112015_c0_g1,TRINITY_DN113081_c0_g1,TRINITY_DN11424_c0_g2,TRINITY_DN117158_c0_g1,TRINITY_DN12102_c0_g1,TRINITY_DN12102_c0_g2,TRINITY_DN12272_c1_g1,TRINITY_DN13433_c1_g3,TRINITY_DN1940_c0_g1,TRINITY_DN21080_c1_g1,TRINITY_DN3323_c0_g1,TRINITY_DN35464_c0_g1,TRINITY_DN3725_c0_g1,TRINITY_DN6901_c0_g1,TRINITY_DN6978_c0_g1,TRINITY_DN796_c0_g1,TRINITY…	TRINITY_DN100396_c0_g1,TRINITY_DN100728_c0_g1,TRINITY_DN100824_c0_g1,TRINITY_DN100860_c0_g1,TRINITY_DN100883_c0_g1,TRINITY_DN100983_c0_g1,TRINITY_DN101058_c0_g1,TRINITY_DN101175_c0_g1,TRINITY_DN10135_c0_g2,TRINITY_DN101503_c0_g1,TRINITY_DN101614_c0_g1,TRINITY_DN101686_c0_g1,TRINITY_DN101896_c0_g1,TRINITY_DN102153_c0_g1,TRINITY_DN102475_c0_g1,TRINITY_DN10294_c3_g1,TRINITY_DN103490_c0_g1,TRINITY_DN…
CC	GO:0022626	cytosolic ribosome	15	362	377	856	< 1e-30	1.556e-27	TRINITY_DN10167_c0_g1,TRINITY_DN112015_c0_g1,TRINITY_DN113081_c0_g1,TRINITY_DN11424_c0_g2,TRINITY_DN117158_c0_g1,TRINITY_DN1940_c0_g1,TRINITY_DN21080_c1_g1,TRINITY_DN3323_c0_g1,TRINITY_DN35464_c0_g1,TRINITY_DN6901_c0_g1,TRINITY_DN6978_c0_g1,TRINITY_DN796_c0_g1,TRINITY_DN8617_c0_g1,TRINITY_DN8645_c0_g2,TRINITY_DN9048_c0_g2	TRINITY_DN100728_c0_g1,TRINITY_DN100860_c0_g1,TRINITY_DN100983_c0_g1,TRINITY_DN101058_c0_g1,TRINITY_DN101175_c0_g1,TRINITY_DN10135_c0_g2,TRINITY_DN101503_c0_g1,TRINITY_DN101614_c0_g1,TRINITY_DN101686_c0_g1,TRINITY_DN102153_c0_g1,TRINITY_DN102475_c0_g1,TRINITY_DN103539_c0_g1,TRINITY_DN104072_c0_g1,TRINITY_DN104203_c0_g1,TRINITY_DN104627_c0_g1,TRINITY_DN104776_c0_g1,TRINITY_DN104828_c0_g1,TRINITY_D…
CC	GO:0044391	ribosomal subunit	8	345	353	810	< 1e-30	1.556e-27	TRINITY_DN10167_c0_g1,TRINITY_DN11090_c1_g1,TRINITY_DN13433_c1_g3,TRINITY_DN21080_c1_g1,TRINITY_DN35464_c0_g1,TRINITY_DN6901_c0_g1,TRINITY_DN8617_c0_g1,TRINITY_DN8645_c0_g2	TRINITY_DN100728_c0_g1,TRINITY_DN100860_c0_g1,TRINITY_DN100883_c0_g1,TRINITY_DN100983_c0_g1,TRINITY_DN101058_c0_g1,TRINITY_DN101175_c0_g1,TRINITY_DN10135_c0_g2,TRINITY_DN101503_c0_g1,TRINITY_DN101614_c0_g1,TRINITY_DN101686_c0_g1,TRINITY_DN102153_c0_g1,TRINITY_DN102475_c0_g1,TRINITY_DN103539_c0_g1,TRINITY_DN104072_c0_g1,TRINITY_DN104203_c0_g1,TRINITY_DN104627_c0_g1,TRINITY_DN104776_c0_g1,TRINITY_D…
CC	GO:0005576	extracellular region	224	379	603	1688	< 1e-30	1.556e-27	TRINITY_DN10000_c0_g2,TRINITY_DN100435_c0_g1,TRINITY_DN10082_c0_g1,TRINITY_DN10291_c0_g1,TRINITY_DN103505_c0_g1,TRINITY_DN105495_c0_g1,TRINITY_DN10819_c0_g1,TRINITY_DN108313_c0_g1,TRINITY_DN10840_c0_g1,TRINITY_DN10864_c0_g1,TRINITY_DN10885_c0_g1,TRINITY_DN109104_c0_g1,TRINITY_DN109144_c0_g1,TRINITY_DN10978_c0_g2,TRINITY_DN11080_c1_g1,TRINITY_DN1108_c0_g1,TRINITY_DN112015_c0_g1,TRINITY_DN112685_c0…	TRINITY_DN100242_c0_g1,TRINITY_DN100951_c0_g1,TRINITY_DN101198_c0_g1,TRINITY_DN10129_c0_g2,TRINITY_DN10169_c0_g1,TRINITY_DN103536_c0_g1,TRINITY_DN103565_c0_g1,TRINITY_DN103592_c0_g1,TRINITY_DN103736_c0_g1,TRINITY_DN103933_c0_g1,TRINITY_DN104341_c0_g1,TRINITY_DN104493_c0_g1,TRINITY_DN104876_c0_g1,TRINITY_DN107689_c0_g1,TRINITY_DN10802_c0_g1,TRINITY_DN108218_c0_g1,TRINITY_DN108695_c0_g1,TRINITY_DN1…
BP	GO:0043604	amide biosynthetic process	41	615	656	1909	3.8e-29	5.06811e-26	TRINITY_DN10167_c0_g1,TRINITY_DN10179_c0_g1,TRINITY_DN10320_c0_g1,TRINITY_DN105440_c0_g1,TRINITY_DN10734_c0_g1,TRINITY_DN11090_c1_g1,TRINITY_DN12102_c0_g1,TRINITY_DN12102_c0_g2,TRINITY_DN12272_c1_g1,TRINITY_DN12675_c0_g1,TRINITY_DN12741_c0_g1,TRINITY_DN13080_c0_g1,TRINITY_DN13433_c1_g3,TRINITY_DN13578_c0_g1,TRINITY_DN16733_c0_g2,TRINITY_DN1732_c2_g1,TRINITY_DN20460_c0_g1,TRINITY_DN20637_c0_g1,TRI…	TRINITY_DN100388_c0_g1,TRINITY_DN100406_c0_g1,TRINITY_DN100728_c0_g1,TRINITY_DN100779_c0_g1,TRINITY_DN100824_c0_g1,TRINITY_DN100860_c0_g1,TRINITY_DN100883_c0_g1,TRINITY_DN100983_c0_g1,TRINITY_DN101058_c0_g1,TRINITY_DN101175_c0_g1,TRINITY_DN101198_c0_g1,TRINITY_DN10135_c0_g2,TRINITY_DN101503_c0_g1,TRINITY_DN10158_c0_g1,TRINITY_DN101614_c0_g1,TRINITY_DN101686_c0_g1,TRINITY_DN102153_c0_g1,TRINITY_DN…
BP	GO:0043043	peptide biosynthetic process	33	570	603	1743	1.4e-27	1.6338e-24	TRINITY_DN10167_c0_g1,TRINITY_DN10179_c0_g1,TRINITY_DN10320_c0_g1,TRINITY_DN105440_c0_g1,TRINITY_DN10734_c0_g1,TRINITY_DN11090_c1_g1,TRINITY_DN12102_c0_g1,TRINITY_DN12102_c0_g2,TRINITY_DN12272_c1_g1,TRINITY_DN12675_c0_g1,TRINITY_DN13080_c0_g1,TRINITY_DN13433_c1_g3,TRINITY_DN13578_c0_g1,TRINITY_DN1732_c2_g1,TRINITY_DN20460_c0_g1,TRINITY_DN20637_c0_g1,TRINITY_DN21080_c1_g1,TRINITY_DN21918_c0_g1,TRI…	TRINITY_DN100388_c0_g1,TRINITY_DN100406_c0_g1,TRINITY_DN100728_c0_g1,TRINITY_DN100779_c0_g1,TRINITY_DN100824_c0_g1,TRINITY_DN100860_c0_g1,TRINITY_DN100883_c0_g1,TRINITY_DN100983_c0_g1,TRINITY_DN101058_c0_g1,TRINITY_DN101175_c0_g1,TRINITY_DN101198_c0_g1,TRINITY_DN10135_c0_g2,TRINITY_DN101503_c0_g1,TRINITY_DN10158_c0_g1,TRINITY_DN101614_c0_g1,TRINITY_DN101686_c0_g1,TRINITY_DN102153_c0_g1,TRINITY_DN…
BP	GO:0006412	translation	32	563	595	1725	7.6e-27	7.88373e-24	TRINITY_DN10167_c0_g1,TRINITY_DN10179_c0_g1,TRINITY_DN10320_c0_g1,TRINITY_DN105440_c0_g1,TRINITY_DN10734_c0_g1,TRINITY_DN11090_c1_g1,TRINITY_DN12102_c0_g1,TRINITY_DN12102_c0_g2,TRINITY_DN12272_c1_g1,TRINITY_DN12675_c0_g1,TRINITY_DN13080_c0_g1,TRINITY_DN13433_c1_g3,TRINITY_DN13578_c0_g1,TRINITY_DN1732_c2_g1,TRINITY_DN20460_c0_g1,TRINITY_DN20637_c0_g1,TRINITY_DN21080_c1_g1,TRINITY_DN21918_c0_g1,TRI…	TRINITY_DN100388_c0_g1,TRINITY_DN100406_c0_g1,TRINITY_DN100728_c0_g1,TRINITY_DN100779_c0_g1,TRINITY_DN100824_c0_g1,TRINITY_DN100860_c0_g1,TRINITY_DN100883_c0_g1,TRINITY_DN100983_c0_g1,TRINITY_DN101058_c0_g1,TRINITY_DN101175_c0_g1,TRINITY_DN101198_c0_g1,TRINITY_DN10135_c0_g2,TRINITY_DN101503_c0_g1,TRINITY_DN10158_c0_g1,TRINITY_DN101614_c0_g1,TRINITY_DN101686_c0_g1,TRINITY_DN102153_c0_g1,TRINITY_DN…
BP	GO:0043603	cellular amide metabolic process	54	658	712	2155	4.4e-26	4.10784e-23	TRINITY_DN10167_c0_g1,TRINITY_DN10179_c0_g1,TRINITY_DN10320_c0_g1,TRINITY_DN105440_c0_g1,TRINITY_DN10734_c0_g1,TRINITY_DN11090_c1_g1,TRINITY_DN11415_c0_g1,TRINITY_DN12102_c0_g1,TRINITY_DN12102_c0_g2,TRINITY_DN12272_c1_g1,TRINITY_DN12675_c0_g1,TRINITY_DN12741_c0_g1,TRINITY_DN13080_c0_g1,TRINITY_DN13433_c1_g3,TRINITY_DN13578_c0_g1,TRINITY_DN16733_c0_g2,TRINITY_DN1732_c2_g1,TRINITY_DN20460_c0_g1,TRI…	TRINITY_DN100388_c0_g1,TRINITY_DN100406_c0_g1,TRINITY_DN100728_c0_g1,TRINITY_DN100779_c0_g1,TRINITY_DN100824_c0_g1,TRINITY_DN100860_c0_g1,TRINITY_DN100883_c0_g1,TRINITY_DN100983_c0_g1,TRINITY_DN101058_c0_g1,TRINITY_DN101175_c0_g1,TRINITY_DN101198_c0_g1,TRINITY_DN10135_c0_g2,TRINITY_DN101503_c0_g1,TRINITY_DN10158_c0_g1,TRINITY_DN101614_c0_g1,TRINITY_DN101686_c0_g1,TRINITY_DN102153_c0_g1,TRINITY_DN…
BP	GO:0006518	peptide metabolic process	44	587	631	1866	6.4e-26	5.43185e-23	TRINITY_DN10167_c0_g1,TRINITY_DN10179_c0_g1,TRINITY_DN10320_c0_g1,TRINITY_DN105440_c0_g1,TRINITY_DN10734_c0_g1,TRINITY_DN11090_c1_g1,TRINITY_DN12102_c0_g1,TRINITY_DN12102_c0_g2,TRINITY_DN12272_c1_g1,TRINITY_DN12675_c0_g1,TRINITY_DN13080_c0_g1,TRINITY_DN13433_c1_g3,TRINITY_DN13578_c0_g1,TRINITY_DN1732_c2_g1,TRINITY_DN20460_c0_g1,TRINITY_DN20637_c0_g1,TRINITY_DN21080_c1_g1,TRINITY_DN21918_c0_g1,TRI…	TRINITY_DN100388_c0_g1,TRINITY_DN100406_c0_g1,TRINITY_DN100728_c0_g1,TRINITY_DN100779_c0_g1,TRINITY_DN100824_c0_g1,TRINITY_DN100860_c0_g1,TRINITY_DN100883_c0_g1,TRINITY_DN100983_c0_g1,TRINITY_DN101058_c0_g1,TRINITY_DN101175_c0_g1,TRINITY_DN101198_c0_g1,TRINITY_DN10135_c0_g2,TRINITY_DN101503_c0_g1,TRINITY_DN10158_c0_g1,TRINITY_DN101614_c0_g1,TRINITY_DN101686_c0_g1,TRINITY_DN102153_c0_g1,TRINITY_DN…
CC	GO:0022627	cytosolic small ribosomal subunit	2	149	151	297	4.7e-25	3.6566e-22	TRINITY_DN6901_c0_g1,TRINITY_DN8617_c0_g1	TRINITY_DN100728_c0_g1,TRINITY_DN100983_c0_g1,TRINITY_DN101058_c0_g1,TRINITY_DN101175_c0_g1,TRINITY_DN101503_c0_g1,TRINITY_DN102475_c0_g1,TRINITY_DN103539_c0_g1,TRINITY_DN104072_c0_g1,TRINITY_DN104776_c0_g1,TRINITY_DN104828_c0_g1,TRINITY_DN105594_c0_g1,TRINITY_DN106555_c0_g1,TRINITY_DN106752_c0_g1,TRINITY_DN10815_c0_g3,TRINITY_DN108639_c0_g1,TRINITY_DN109215_c0_g1,TRINITY_DN112001_c0_g1,TRINITY_D…
CC	GO:0015935	small ribosomal subunit	3	157	160	338	2.8e-22	2.01083e-19	TRINITY_DN13433_c1_g3,TRINITY_DN6901_c0_g1,TRINITY_DN8617_c0_g1	TRINITY_DN100728_c0_g1,TRINITY_DN100883_c0_g1,TRINITY_DN100983_c0_g1,TRINITY_DN101058_c0_g1,TRINITY_DN101175_c0_g1,TRINITY_DN101503_c0_g1,TRINITY_DN102475_c0_g1,TRINITY_DN103539_c0_g1,TRINITY_DN104072_c0_g1,TRINITY_DN104776_c0_g1,TRINITY_DN104828_c0_g1,TRINITY_DN105594_c0_g1,TRINITY_DN106555_c0_g1,TRINITY_DN106752_c0_g1,TRINITY_DN10815_c0_g3,TRINITY_DN108639_c0_g1,TRINITY_DN109215_c0_g1,TRINITY_D…
BP	GO:0055114	oxidation-reduction process	248	519	767	2440	2.8e-21	1.8672e-18	TRINITY_DN10000_c0_g2,TRINITY_DN10004_c0_g1,TRINITY_DN10043_c0_g1,TRINITY_DN10074_c0_g1,TRINITY_DN100945_c0_g1,TRINITY_DN101097_c0_g1,TRINITY_DN10133_c0_g1,TRINITY_DN103968_c0_g1,TRINITY_DN104720_c0_g1,TRINITY_DN10563_c0_g1,TRINITY_DN10602_c0_g1,TRINITY_DN10681_c0_g1,TRINITY_DN108096_c0_g1,TRINITY_DN108313_c0_g1,TRINITY_DN108371_c0_g1,TRINITY_DN1094_c0_g1,TRINITY_DN10978_c0_g2,TRINITY_DN11022_c0_…	TRINITY_DN10012_c0_g1,TRINITY_DN100343_c0_g1,TRINITY_DN100700_c0_g1,TRINITY_DN100902_c0_g1,TRINITY_DN100955_c0_g1,TRINITY_DN101361_c0_g1,TRINITY_DN101548_c0_g1,TRINITY_DN101674_c0_g1,TRINITY_DN10169_c0_g1,TRINITY_DN10180_c0_g1,TRINITY_DN10229_c0_g1,TRINITY_DN1031_c0_g1,TRINITY_DN103933_c0_g1,TRINITY_DN10425_c1_g1,TRINITY_DN10437_c0_g1,TRINITY_DN1045_c0_g1,TRINITY_DN104679_c0_g1,TRINITY_DN104775_c…
CC	GO:0005618	cell wall	116	306	422	1208	7.2e-21	4.48128e-18	TRINITY_DN10000_c0_g2,TRINITY_DN10291_c0_g1,TRINITY_DN10819_c0_g1,TRINITY_DN108313_c0_g1,TRINITY_DN10885_c0_g1,TRINITY_DN109104_c0_g1,TRINITY_DN1108_c0_g1,TRINITY_DN112015_c0_g1,TRINITY_DN11519_c0_g1,TRINITY_DN11533_c1_g1,TRINITY_DN116445_c0_g1,TRINITY_DN116785_c0_g1,TRINITY_DN11737_c0_g1,TRINITY_DN11938_c0_g1,TRINITY_DN121173_c0_g1,TRINITY_DN121634_c0_g1,TRINITY_DN121664_c0_g1,TRINITY_DN12229_c0…	TRINITY_DN100117_c0_g1,TRINITY_DN100728_c0_g1,TRINITY_DN100951_c0_g1,TRINITY_DN100955_c0_g1,TRINITY_DN100983_c0_g1,TRINITY_DN102475_c0_g1,TRINITY_DN104072_c0_g1,TRINITY_DN104776_c0_g1,TRINITY_DN104828_c0_g1,TRINITY_DN105270_c0_g1,TRINITY_DN105966_c0_g1,TRINITY_DN106752_c0_g1,TRINITY_DN106761_c0_g1,TRINITY_DN10773_c0_g1,TRINITY_DN10815_c0_g2,TRINITY_DN10815_c0_g3,TRINITY_DN108473_c0_g1,TRINITY_DN1…
CC	GO:0030312	external encapsulating structure	116	307	423	1212	7.9e-21	4.60965e-18	TRINITY_DN10000_c0_g2,TRINITY_DN10291_c0_g1,TRINITY_DN10819_c0_g1,TRINITY_DN108313_c0_g1,TRINITY_DN10885_c0_g1,TRINITY_DN109104_c0_g1,TRINITY_DN1108_c0_g1,TRINITY_DN112015_c0_g1,TRINITY_DN11519_c0_g1,TRINITY_DN11533_c1_g1,TRINITY_DN116445_c0_g1,TRINITY_DN116785_c0_g1,TRINITY_DN11737_c0_g1,TRINITY_DN11938_c0_g1,TRINITY_DN121173_c0_g1,TRINITY_DN121634_c0_g1,TRINITY_DN121664_c0_g1,TRINITY_DN12229_c0…	TRINITY_DN100117_c0_g1,TRINITY_DN100728_c0_g1,TRINITY_DN100951_c0_g1,TRINITY_DN100955_c0_g1,TRINITY_DN100983_c0_g1,TRINITY_DN102475_c0_g1,TRINITY_DN104072_c0_g1,TRINITY_DN104776_c0_g1,TRINITY_DN104828_c0_g1,TRINITY_DN105270_c0_g1,TRINITY_DN105966_c0_g1,TRINITY_DN106752_c0_g1,TRINITY_DN106761_c0_g1,TRINITY_DN10773_c0_g1,TRINITY_DN10815_c0_g2,TRINITY_DN10815_c0_g3,TRINITY_DN108473_c0_g1,TRINITY_DN1…
CC	GO:0042788	polysomal ribosome	3	167	170	385	1.2e-19	6.59012e-17	TRINITY_DN6901_c0_g1,TRINITY_DN8617_c0_g1,TRINITY_DN8645_c0_g2	TRINITY_DN100728_c0_g1,TRINITY_DN100860_c0_g1,TRINITY_DN100983_c0_g1,TRINITY_DN10135_c0_g2,TRINITY_DN101686_c0_g1,TRINITY_DN102475_c0_g1,TRINITY_DN103539_c0_g1,TRINITY_DN104072_c0_g1,TRINITY_DN104203_c0_g1,TRINITY_DN104776_c0_g1,TRINITY_DN104828_c0_g1,TRINITY_DN106004_c0_g1,TRINITY_DN106215_c0_g1,TRINITY_DN106752_c0_g1,TRINITY_DN106761_c0_g1,TRINITY_DN107862_c0_g1,TRINITY_DN10815_c0_g2,TRINITY_DN…
BP	GO:0050896	response to stimulus	837	1660	2497	9395	1.9e-19	9.85467e-17	TRINITY_DN10007_c0_g1,TRINITY_DN10019_c0_g1,TRINITY_DN10022_c0_g1,TRINITY_DN10074_c0_g1,TRINITY_DN10079_c0_g1,TRINITY_DN10082_c0_g1,TRINITY_DN100869_c0_g1,TRINITY_DN100945_c0_g1,TRINITY_DN10098_c0_g1,TRINITY_DN101170_c0_g1,TRINITY_DN10157_c1_g2,TRINITY_DN101651_c0_g1,TRINITY_DN10179_c0_g1,TRINITY_DN10195_c0_g1,TRINITY_DN10248_c0_g3,TRINITY_DN10263_c0_g1,TRINITY_DN1026_c0_g1,TRINITY_DN10301_c0_g1,…	TRINITY_DN100242_c0_g1,TRINITY_DN100343_c0_g1,TRINITY_DN100356_c0_g1,TRINITY_DN100384_c0_g1,TRINITY_DN100389_c0_g1,TRINITY_DN100406_c0_g1,TRINITY_DN100489_c0_g1,TRINITY_DN100544_c0_g1,TRINITY_DN100625_c0_g1,TRINITY_DN100633_c0_g1,TRINITY_DN100648_c0_g1,TRINITY_DN100902_c0_g1,TRINITY_DN100951_c0_g1,TRINITY_DN100955_c0_g1,TRINITY_DN101036_c0_g1,TRINITY_DN101081_c0_g1,TRINITY_DN101198_c0_g1,TRINITY_…
BP	GO:0042221	response to chemical	500	1003	1503	5335	2.2e-19	1.08101e-16	TRINITY_DN10007_c0_g1,TRINITY_DN10019_c0_g1,TRINITY_DN10074_c0_g1,TRINITY_DN100869_c0_g1,TRINITY_DN101170_c0_g1,TRINITY_DN10157_c1_g2,TRINITY_DN101651_c0_g1,TRINITY_DN10195_c0_g1,TRINITY_DN10248_c0_g3,TRINITY_DN10263_c0_g1,TRINITY_DN1026_c0_g1,TRINITY_DN10301_c0_g1,TRINITY_DN10318_c0_g1,TRINITY_DN103505_c0_g1,TRINITY_DN103968_c0_g1,TRINITY_DN10401_c0_g1,TRINITY_DN10422_c0_g1,TRINITY_DN10457_c0_g1…	TRINITY_DN100343_c0_g1,TRINITY_DN100406_c0_g1,TRINITY_DN100489_c0_g1,TRINITY_DN100544_c0_g1,TRINITY_DN100625_c0_g1,TRINITY_DN100633_c0_g1,TRINITY_DN100902_c0_g1,TRINITY_DN100955_c0_g1,TRINITY_DN10129_c0_g2,TRINITY_DN10159_c0_g1,TRINITY_DN10203_c0_g1,TRINITY_DN102348_c0_g1,TRINITY_DN10291_c2_g1,TRINITY_DN10291_c2_g3,TRINITY_DN1031_c0_g1,TRINITY_DN103491_c0_g1,TRINITY_DN103536_c0_g1,TRINITY_DN10356…
BP	GO:1901566	organonitrogen compound biosynthetic process	148	868	1016	3440	1.1e-18	5.1348e-16	TRINITY_DN101353_c0_g1,TRINITY_DN10167_c0_g1,TRINITY_DN10179_c0_g1,TRINITY_DN10320_c0_g1,TRINITY_DN10427_c0_g1,TRINITY_DN10462_c0_g1,TRINITY_DN10492_c0_g3,TRINITY_DN10508_c0_g1,TRINITY_DN105440_c0_g1,TRINITY_DN10734_c0_g1,TRINITY_DN10978_c0_g2,TRINITY_DN11008_c0_g1,TRINITY_DN11090_c1_g1,TRINITY_DN11387_c0_g1,TRINITY_DN11415_c0_g1,TRINITY_DN11424_c0_g1,TRINITY_DN11424_c0_g2,TRINITY_DN11617_c0_g1,T…	TRINITY_DN100343_c0_g1,TRINITY_DN100388_c0_g1,TRINITY_DN100406_c0_g1,TRINITY_DN100563_c0_g1,TRINITY_DN100728_c0_g1,TRINITY_DN100779_c0_g1,TRINITY_DN100824_c0_g1,TRINITY_DN100860_c0_g1,TRINITY_DN100883_c0_g1,TRINITY_DN100983_c0_g1,TRINITY_DN101058_c0_g1,TRINITY_DN101175_c0_g1,TRINITY_DN101198_c0_g1,TRINITY_DN10135_c0_g2,TRINITY_DN101503_c0_g1,TRINITY_DN10158_c0_g1,TRINITY_DN101614_c0_g1,TRINITY_DN…
MF	GO:0016491	oxidoreductase activity	223	433	656	2048	1.8e-18	8.00229e-16	TRINITY_DN10000_c0_g2,TRINITY_DN10004_c0_g1,TRINITY_DN10043_c0_g1,TRINITY_DN10074_c0_g1,TRINITY_DN100945_c0_g1,TRINITY_DN10133_c0_g1,TRINITY_DN103968_c0_g1,TRINITY_DN104720_c0_g1,TRINITY_DN10563_c0_g1,TRINITY_DN10602_c0_g1,TRINITY_DN108096_c0_g1,TRINITY_DN108313_c0_g1,TRINITY_DN108371_c0_g1,TRINITY_DN1094_c0_g1,TRINITY_DN10978_c0_g2,TRINITY_DN11022_c0_g1,TRINITY_DN1113_c0_g3,TRINITY_DN11172_c0_g1…	TRINITY_DN10012_c0_g1,TRINITY_DN100343_c0_g1,TRINITY_DN100700_c0_g1,TRINITY_DN100902_c0_g1,TRINITY_DN101361_c0_g1,TRINITY_DN101548_c0_g1,TRINITY_DN101674_c0_g1,TRINITY_DN10180_c0_g1,TRINITY_DN10229_c0_g1,TRINITY_DN1031_c0_g1,TRINITY_DN103933_c0_g1,TRINITY_DN10425_c1_g1,TRINITY_DN10437_c0_g1,TRINITY_DN1045_c0_g1,TRINITY_DN10489_c1_g1,TRINITY_DN10521_c0_g1,TRINITY_DN105499_c0_g1,TRINITY_DN10591_c0_…
CC	GO:0022625	cytosolic large ribosomal subunit	4	181	185	442	3e-18	1.27309e-15	TRINITY_DN10167_c0_g1,TRINITY_DN21080_c1_g1,TRINITY_DN35464_c0_g1,TRINITY_DN8645_c0_g2	TRINITY_DN100860_c0_g1,TRINITY_DN10135_c0_g2,TRINITY_DN101614_c0_g1,TRINITY_DN101686_c0_g1,TRINITY_DN102153_c0_g1,TRINITY_DN104203_c0_g1,TRINITY_DN104627_c0_g1,TRINITY_DN104843_c0_g1,TRINITY_DN105558_c0_g1,TRINITY_DN105975_c0_g1,TRINITY_DN106004_c0_g1,TRINITY_DN106063_c0_g1,TRINITY_DN106134_c0_g1,TRINITY_DN106215_c0_g1,TRINITY_DN106761_c0_g1,TRINITY_DN106977_c0_g1,TRINITY_DN107038_c0_g1,TRINITY_D…
BP	GO:0006950	response to stress	515	1034	1549	5572	1.4e-17	5.446e-15	TRINITY_DN10019_c0_g1,TRINITY_DN10022_c0_g1,TRINITY_DN10074_c0_g1,TRINITY_DN10082_c0_g1,TRINITY_DN100869_c0_g1,TRINITY_DN101651_c0_g1,TRINITY_DN10195_c0_g1,TRINITY_DN10263_c0_g1,TRINITY_DN1026_c0_g1,TRINITY_DN10301_c0_g1,TRINITY_DN10320_c0_g1,TRINITY_DN103505_c0_g1,TRINITY_DN103968_c0_g1,TRINITY_DN10422_c0_g1,TRINITY_DN10427_c0_g1,TRINITY_DN10459_c0_g1,TRINITY_DN104720_c0_g1,TRINITY_DN10508_c0_g1…	TRINITY_DN100242_c0_g1,TRINITY_DN100389_c0_g1,TRINITY_DN100489_c0_g1,TRINITY_DN100625_c0_g1,TRINITY_DN100648_c0_g1,TRINITY_DN100902_c0_g1,TRINITY_DN100951_c0_g1,TRINITY_DN100955_c0_g1,TRINITY_DN101036_c0_g1,TRINITY_DN101081_c0_g1,TRINITY_DN101198_c0_g1,TRINITY_DN10129_c0_g2,TRINITY_DN101548_c0_g1,TRINITY_DN10158_c0_g1,TRINITY_DN10159_c0_g1,TRINITY_DN101686_c0_g1,TRINITY_DN10169_c0_g1,TRINITY_DN10…
CC	GO:1990904	ribonucleoprotein complex	28	563	591	1871	1.4e-17	5.446e-15	TRINITY_DN10167_c0_g1,TRINITY_DN11090_c1_g1,TRINITY_DN112015_c0_g1,TRINITY_DN113081_c0_g1,TRINITY_DN11424_c0_g2,TRINITY_DN117158_c0_g1,TRINITY_DN12102_c0_g1,TRINITY_DN12102_c0_g2,TRINITY_DN12200_c0_g2,TRINITY_DN12272_c1_g1,TRINITY_DN13433_c1_g3,TRINITY_DN1940_c0_g1,TRINITY_DN21080_c1_g1,TRINITY_DN27406_c0_g1,TRINITY_DN28365_c0_g1,TRINITY_DN3113_c0_g2,TRINITY_DN3323_c0_g1,TRINITY_DN35464_c0_g1,TRI…	TRINITY_DN100371_c0_g1,TRINITY_DN100396_c0_g1,TRINITY_DN100728_c0_g1,TRINITY_DN100824_c0_g1,TRINITY_DN100860_c0_g1,TRINITY_DN100883_c0_g1,TRINITY_DN100983_c0_g1,TRINITY_DN101058_c0_g1,TRINITY_DN101175_c0_g1,TRINITY_DN10135_c0_g2,TRINITY_DN101503_c0_g1,TRINITY_DN101614_c0_g1,TRINITY_DN101686_c0_g1,TRINITY_DN101896_c0_g1,TRINITY_DN102153_c0_g1,TRINITY_DN102475_c0_g1,TRINITY_DN10294_c3_g1,TRINITY_DN…
CC	GO:0015934	large ribosomal subunit	5	188	193	473	1.5e-17	5.6016e-15	TRINITY_DN10167_c0_g1,TRINITY_DN11090_c1_g1,TRINITY_DN21080_c1_g1,TRINITY_DN35464_c0_g1,TRINITY_DN8645_c0_g2	TRINITY_DN100860_c0_g1,TRINITY_DN10135_c0_g2,TRINITY_DN101614_c0_g1,TRINITY_DN101686_c0_g1,TRINITY_DN102153_c0_g1,TRINITY_DN104203_c0_g1,TRINITY_DN104627_c0_g1,TRINITY_DN104843_c0_g1,TRINITY_DN105558_c0_g1,TRINITY_DN105975_c0_g1,TRINITY_DN106004_c0_g1,TRINITY_DN106063_c0_g1,TRINITY_DN106134_c0_g1,TRINITY_DN106215_c0_g1,TRINITY_DN106761_c0_g1,TRINITY_DN106977_c0_g1,TRINITY_DN107038_c0_g1,TRINITY_D…
CC	GO:0048046	apoplast	98	139	237	625	1.2e-16	4.30892e-14	TRINITY_DN103505_c0_g1,TRINITY_DN10840_c0_g1,TRINITY_DN10885_c0_g1,TRINITY_DN10978_c0_g2,TRINITY_DN11080_c1_g1,TRINITY_DN112015_c0_g1,TRINITY_DN11424_c0_g1,TRINITY_DN11424_c0_g2,TRINITY_DN11451_c0_g1,TRINITY_DN11451_c0_g2,TRINITY_DN11519_c0_g1,TRINITY_DN11533_c1_g1,TRINITY_DN116445_c0_g1,TRINITY_DN116785_c0_g1,TRINITY_DN11701_c0_g1,TRINITY_DN1174_c2_g1,TRINITY_DN12079_c0_g1,TRINITY_DN121634_c0_g1…	TRINITY_DN101198_c0_g1,TRINITY_DN10169_c0_g1,TRINITY_DN103933_c0_g1,TRINITY_DN10802_c0_g1,TRINITY_DN108218_c0_g1,TRINITY_DN108840_c0_g1,TRINITY_DN10949_c0_g1,TRINITY_DN112120_c0_g1,TRINITY_DN112560_c0_g1,TRINITY_DN112911_c0_g1,TRINITY_DN113089_c0_g1,TRINITY_DN114065_c0_g1,TRINITY_DN11440_c0_g1,TRINITY_DN116937_c0_g1,TRINITY_DN123395_c0_g1,TRINITY_DN1280_c3_g1,TRINITY_DN12997_c0_g1,TRINITY_DN13230…
CC	GO:0005844	polysome	3	169	172	419	4.3e-16	1.48684e-13	TRINITY_DN6901_c0_g1,TRINITY_DN8617_c0_g1,TRINITY_DN8645_c0_g2	TRINITY_DN100728_c0_g1,TRINITY_DN100860_c0_g1,TRINITY_DN100983_c0_g1,TRINITY_DN10135_c0_g2,TRINITY_DN101686_c0_g1,TRINITY_DN102475_c0_g1,TRINITY_DN103539_c0_g1,TRINITY_DN104072_c0_g1,TRINITY_DN104203_c0_g1,TRINITY_DN104776_c0_g1,TRINITY_DN104828_c0_g1,TRINITY_DN106004_c0_g1,TRINITY_DN106215_c0_g1,TRINITY_DN106752_c0_g1,TRINITY_DN106761_c0_g1,TRINITY_DN107862_c0_g1,TRINITY_DN10815_c0_g2,TRINITY_DN…
CC	GO:0071944	cell periphery	401	1162	1563	5732	1.1e-15	3.66771e-13	TRINITY_DN10000_c0_g2,TRINITY_DN10079_c0_g1,TRINITY_DN100869_c0_g1,TRINITY_DN101170_c0_g1,TRINITY_DN10157_c1_g1,TRINITY_DN10157_c1_g2,TRINITY_DN10248_c0_g3,TRINITY_DN10248_c0_g4,TRINITY_DN10263_c0_g1,TRINITY_DN10291_c0_g1,TRINITY_DN10318_c0_g1,TRINITY_DN103505_c0_g1,TRINITY_DN103509_c0_g1,TRINITY_DN103517_c0_g1,TRINITY_DN10429_c0_g1,TRINITY_DN1044_c0_g1,TRINITY_DN105326_c0_g1,TRINITY_DN10534_c0_g…	TRINITY_DN100117_c0_g1,TRINITY_DN100136_c0_g1,TRINITY_DN100389_c0_g1,TRINITY_DN100489_c0_g1,TRINITY_DN100493_c0_g1,TRINITY_DN100577_c0_g1,TRINITY_DN100700_c0_g1,TRINITY_DN100728_c0_g1,TRINITY_DN100951_c0_g1,TRINITY_DN100955_c0_g1,TRINITY_DN100983_c0_g1,TRINITY_DN101198_c0_g1,TRINITY_DN10129_c0_g2,TRINITY_DN10135_c0_g2,TRINITY_DN10159_c0_g1,TRINITY_DN101614_c0_g1,TRINITY_DN101674_c0_g1,TRINITY_DN1…
BP	GO:0009628	response to abiotic stimulus	381	642	1023	3572	1.2e-14	3.86317e-12	TRINITY_DN10019_c0_g1,TRINITY_DN10022_c0_g1,TRINITY_DN10079_c0_g1,TRINITY_DN10098_c0_g1,TRINITY_DN101651_c0_g1,TRINITY_DN10179_c0_g1,TRINITY_DN10301_c0_g1,TRINITY_DN10318_c0_g1,TRINITY_DN10320_c0_g1,TRINITY_DN103505_c0_g1,TRINITY_DN103509_c0_g1,TRINITY_DN10422_c0_g1,TRINITY_DN10427_c0_g1,TRINITY_DN10459_c0_g1,TRINITY_DN10462_c0_g1,TRINITY_DN10508_c0_g1,TRINITY_DN10534_c0_g1,TRINITY_DN10549_c0_g1,…	TRINITY_DN100343_c0_g1,TRINITY_DN100356_c0_g1,TRINITY_DN100489_c0_g1,TRINITY_DN100625_c0_g1,TRINITY_DN100648_c0_g1,TRINITY_DN100902_c0_g1,TRINITY_DN100955_c0_g1,TRINITY_DN101036_c0_g1,TRINITY_DN10129_c0_g2,TRINITY_DN10142_c0_g1,TRINITY_DN10158_c0_g1,TRINITY_DN101686_c0_g1,TRINITY_DN10203_c0_g1,TRINITY_DN10291_c2_g1,TRINITY_DN10291_c2_g3,TRINITY_DN10380_c0_g1,TRINITY_DN103891_c0_g1,TRINITY_DN10392…
MF	GO:0046906	tetrapyrrole binding	81	91	172	427	3.8e-14	1.18256e-11	TRINITY_DN10074_c0_g1,TRINITY_DN10133_c0_g1,TRINITY_DN10602_c0_g1,TRINITY_DN10618_c0_g1,TRINITY_DN108313_c0_g1,TRINITY_DN108371_c0_g1,TRINITY_DN10840_c0_g1,TRINITY_DN11022_c0_g1,TRINITY_DN11172_c0_g1,TRINITY_DN11954_c0_g1,TRINITY_DN12108_c0_g1,TRINITY_DN121857_c0_g1,TRINITY_DN12285_c0_g1,TRINITY_DN12615_c0_g1,TRINITY_DN12665_c0_g1,TRINITY_DN12766_c1_g1,TRINITY_DN13120_c0_g1,TRINITY_DN13359_c0_g1,…	TRINITY_DN10012_c0_g1,TRINITY_DN100902_c0_g1,TRINITY_DN101674_c0_g1,TRINITY_DN10180_c0_g1,TRINITY_DN1045_c0_g1,TRINITY_DN10831_c0_g1,TRINITY_DN10886_c0_g1,TRINITY_DN11190_c0_g1,TRINITY_DN112146_c0_g1,TRINITY_DN114002_c0_g1,TRINITY_DN11860_c0_g1,TRINITY_DN1201_c0_g1,TRINITY_DN1201_c0_g3,TRINITY_DN120740_c0_g1,TRINITY_DN12491_c0_g1,TRINITY_DN12766_c0_g1,TRINITY_DN12766_c0_g2,TRINITY_DN1407_c0_g1,TR…
CC	GO:0005773	vacuole	111	537	648	2185	7e-13	2.10813e-10	TRINITY_DN101651_c0_g1,TRINITY_DN10179_c0_g1,TRINITY_DN10534_c0_g1,TRINITY_DN105495_c0_g1,TRINITY_DN108313_c0_g1,TRINITY_DN109144_c0_g1,TRINITY_DN11050_c0_g1,TRINITY_DN11262_c0_g1,TRINITY_DN112767_c0_g1,TRINITY_DN11284_c0_g1,TRINITY_DN11355_c0_g1,TRINITY_DN11382_c0_g1,TRINITY_DN11407_c0_g1,TRINITY_DN11489_c0_g1,TRINITY_DN11519_c0_g1,TRINITY_DN116785_c0_g1,TRINITY_DN1174_c2_g1,TRINITY_DN11938_c0_g…	TRINITY_DN100117_c0_g1,TRINITY_DN100136_c0_g1,TRINITY_DN100384_c0_g1,TRINITY_DN100489_c0_g1,TRINITY_DN100700_c0_g1,TRINITY_DN100808_c0_g1,TRINITY_DN100860_c0_g1,TRINITY_DN100919_c0_g1,TRINITY_DN100951_c0_g1,TRINITY_DN100955_c0_g1,TRINITY_DN100983_c0_g1,TRINITY_DN101081_c0_g1,TRINITY_DN101198_c0_g1,TRINITY_DN101214_c0_g1,TRINITY_DN101614_c0_g1,TRINITY_DN101686_c0_g1,TRINITY_DN1031_c0_g1,TRINITY_DN…
CC	GO:0009522	photosystem I	25	16	41	64	4.8e-12	1.4004e-09	TRINITY_DN10361_c0_g1,TRINITY_DN10618_c0_g1,TRINITY_DN10840_c0_g1,TRINITY_DN11954_c0_g1,TRINITY_DN14201_c0_g1,TRINITY_DN19123_c0_g1,TRINITY_DN4017_c0_g1,TRINITY_DN4017_c0_g2,TRINITY_DN4041_c0_g1,TRINITY_DN4268_c0_g1,TRINITY_DN4268_c0_g2,TRINITY_DN4441_c0_g1,TRINITY_DN4552_c0_g1,TRINITY_DN4703_c1_g1,TRINITY_DN5815_c0_g2,TRINITY_DN6261_c0_g1,TRINITY_DN63963_c0_g1,TRINITY_DN6562_c0_g1,TRINITY_DN6619…	TRINITY_DN100690_c0_g1,TRINITY_DN114761_c0_g1,TRINITY_DN118059_c0_g1,TRINITY_DN18008_c0_g1,TRINITY_DN18149_c0_g1,TRINITY_DN19489_c0_g1,TRINITY_DN19489_c0_g2,TRINITY_DN20274_c0_g1,TRINITY_DN21156_c1_g1,TRINITY_DN21917_c0_g2,TRINITY_DN25896_c0_g1,TRINITY_DN28848_c0_g1,TRINITY_DN34390_c0_g1,TRINITY_DN46317_c0_g1,TRINITY_DN46317_c0_g2,TRINITY_DN7987_c0_g1
BP	GO:0010035	response to inorganic substance	179	397	576	1920	7.5e-12	2.12182e-09	TRINITY_DN103505_c0_g1,TRINITY_DN10422_c0_g1,TRINITY_DN10603_c0_g2,TRINITY_DN10636_c0_g1,TRINITY_DN10681_c0_g1,TRINITY_DN1094_c0_g1,TRINITY_DN11008_c0_g1,TRINITY_DN11050_c0_g1,TRINITY_DN111968_c0_g1,TRINITY_DN112015_c0_g1,TRINITY_DN112040_c0_g1,TRINITY_DN11355_c0_g1,TRINITY_DN11424_c0_g1,TRINITY_DN11424_c0_g2,TRINITY_DN11519_c0_g1,TRINITY_DN11643_c0_g1,TRINITY_DN11643_c0_g2,TRINITY_DN1179_c0_g2,T…	TRINITY_DN100406_c0_g1,TRINITY_DN100489_c0_g1,TRINITY_DN100902_c0_g1,TRINITY_DN100955_c0_g1,TRINITY_DN10129_c0_g2,TRINITY_DN10291_c2_g1,TRINITY_DN10291_c2_g3,TRINITY_DN103491_c0_g1,TRINITY_DN103891_c0_g1,TRINITY_DN103933_c0_g1,TRINITY_DN104264_c0_g1,TRINITY_DN10436_c0_g1,TRINITY_DN104775_c0_g1,TRINITY_DN105009_c0_g1,TRINITY_DN107707_c0_g1,TRINITY_DN10773_c0_g1,TRINITY_DN107841_c0_g1,TRINITY_DN107…
MF	GO:0020037	heme binding	58	77	135	335	2e-11	5.33486e-09	TRINITY_DN10074_c0_g1,TRINITY_DN10133_c0_g1,TRINITY_DN10602_c0_g1,TRINITY_DN108313_c0_g1,TRINITY_DN108371_c0_g1,TRINITY_DN11022_c0_g1,TRINITY_DN11172_c0_g1,TRINITY_DN12108_c0_g1,TRINITY_DN12285_c0_g1,TRINITY_DN12615_c0_g1,TRINITY_DN12665_c0_g1,TRINITY_DN12766_c1_g1,TRINITY_DN13359_c0_g1,TRINITY_DN13689_c0_g1,TRINITY_DN14968_c0_g1,TRINITY_DN15424_c0_g1,TRINITY_DN15640_c0_g1,TRINITY_DN1568_c0_g2,TR…	TRINITY_DN10012_c0_g1,TRINITY_DN100902_c0_g1,TRINITY_DN101674_c0_g1,TRINITY_DN10180_c0_g1,TRINITY_DN1045_c0_g1,TRINITY_DN10831_c0_g1,TRINITY_DN10886_c0_g1,TRINITY_DN11190_c0_g1,TRINITY_DN114002_c0_g1,TRINITY_DN11860_c0_g1,TRINITY_DN1201_c0_g1,TRINITY_DN1201_c0_g3,TRINITY_DN120740_c0_g1,TRINITY_DN12491_c0_g1,TRINITY_DN12766_c0_g1,TRINITY_DN12766_c0_g2,TRINITY_DN1407_c0_g1,TRINITY_DN14280_c0_g1,TRI…
BP	GO:0015979	photosynthesis	80	74	154	402	2e-11	5.33486e-09	TRINITY_DN10043_c0_g1,TRINITY_DN10361_c0_g1,TRINITY_DN10618_c0_g1,TRINITY_DN10681_c0_g1,TRINITY_DN10840_c0_g1,TRINITY_DN11080_c1_g1,TRINITY_DN112015_c0_g1,TRINITY_DN112393_c0_g1,TRINITY_DN11701_c0_g1,TRINITY_DN11954_c0_g1,TRINITY_DN11988_c0_g1,TRINITY_DN12003_c0_g1,TRINITY_DN121857_c0_g1,TRINITY_DN13120_c0_g1,TRINITY_DN13270_c0_g1,TRINITY_DN14201_c0_g1,TRINITY_DN14417_c0_g1,TRINITY_DN15381_c0_g1,…	TRINITY_DN100343_c0_g1,TRINITY_DN100690_c0_g1,TRINITY_DN100955_c0_g1,TRINITY_DN10169_c0_g1,TRINITY_DN10425_c1_g1,TRINITY_DN11250_c0_g1,TRINITY_DN114761_c0_g1,TRINITY_DN11577_c0_g2,TRINITY_DN11577_c0_g3,TRINITY_DN118059_c0_g1,TRINITY_DN119668_c0_g1,TRINITY_DN12046_c0_g2,TRINITY_DN12110_c0_g1,TRINITY_DN12219_c0_g1,TRINITY_DN12748_c0_g1,TRINITY_DN13368_c0_g1,TRINITY_DN13381_c0_g3,TRINITY_DN14608_c0_…
CC	GO:0009521	photosystem	42	27	69	141	3e-11	7.78e-09	TRINITY_DN10361_c0_g1,TRINITY_DN10618_c0_g1,TRINITY_DN10840_c0_g1,TRINITY_DN11954_c0_g1,TRINITY_DN121857_c0_g1,TRINITY_DN13120_c0_g1,TRINITY_DN14201_c0_g1,TRINITY_DN15381_c0_g1,TRINITY_DN15654_c0_g1,TRINITY_DN15733_c0_g1,TRINITY_DN17478_c0_g1,TRINITY_DN18258_c0_g2,TRINITY_DN18838_c0_g4,TRINITY_DN19123_c0_g1,TRINITY_DN2651_c0_g1,TRINITY_DN4017_c0_g1,TRINITY_DN4017_c0_g2,TRINITY_DN4041_c0_g1,TRINIT…	TRINITY_DN100690_c0_g1,TRINITY_DN114761_c0_g1,TRINITY_DN118059_c0_g1,TRINITY_DN14608_c0_g2,TRINITY_DN17652_c0_g1,TRINITY_DN17929_c0_g1,TRINITY_DN18008_c0_g1,TRINITY_DN18141_c0_g1,TRINITY_DN18149_c0_g1,TRINITY_DN19489_c0_g1,TRINITY_DN19489_c0_g2,TRINITY_DN20274_c0_g1,TRINITY_DN21156_c1_g1,TRINITY_DN21917_c0_g2,TRINITY_DN25896_c0_g1,TRINITY_DN28848_c0_g1,TRINITY_DN29460_c0_g1,TRINITY_DN32653_c0_g1,…
BP	GO:0042255	ribosome assembly	2	114	116	282	3.6e-11	9.08368e-09	TRINITY_DN35464_c0_g1,TRINITY_DN8617_c0_g1	TRINITY_DN100728_c0_g1,TRINITY_DN100883_c0_g1,TRINITY_DN101058_c0_g1,TRINITY_DN101686_c0_g1,TRINITY_DN102475_c0_g1,TRINITY_DN104627_c0_g1,TRINITY_DN106063_c0_g1,TRINITY_DN106215_c0_g1,TRINITY_DN106752_c0_g1,TRINITY_DN10815_c0_g3,TRINITY_DN108615_c0_g1,TRINITY_DN108639_c0_g1,TRINITY_DN109069_c0_g1,TRINITY_DN112025_c0_g1,TRINITY_DN113588_c0_g1,TRINITY_DN114211_c0_g1,TRINITY_DN11623_c1_g1,TRINITY_DN…
MF	GO:0048037	cofactor binding	173	253	426	1360	1.1e-10	2.70253e-08	TRINITY_DN10000_c0_g2,TRINITY_DN10043_c0_g1,TRINITY_DN10074_c0_g1,TRINITY_DN100945_c0_g1,TRINITY_DN10133_c0_g1,TRINITY_DN101353_c0_g1,TRINITY_DN1044_c0_g1,TRINITY_DN10602_c0_g1,TRINITY_DN10618_c0_g1,TRINITY_DN107962_c0_g1,TRINITY_DN108313_c0_g1,TRINITY_DN108371_c0_g1,TRINITY_DN10840_c0_g1,TRINITY_DN10978_c0_g2,TRINITY_DN11022_c0_g1,TRINITY_DN11172_c0_g1,TRINITY_DN112040_c0_g1,TRINITY_DN112393_c0_…	TRINITY_DN100009_c0_g1,TRINITY_DN10012_c0_g1,TRINITY_DN100700_c0_g1,TRINITY_DN100902_c0_g1,TRINITY_DN101361_c0_g1,TRINITY_DN101674_c0_g1,TRINITY_DN10180_c0_g1,TRINITY_DN10384_c0_g1,TRINITY_DN104341_c0_g1,TRINITY_DN10437_c0_g1,TRINITY_DN1045_c0_g1,TRINITY_DN105499_c0_g1,TRINITY_DN107689_c0_g1,TRINITY_DN107841_c0_g1,TRINITY_DN10831_c0_g1,TRINITY_DN108550_c0_g1,TRINITY_DN108652_c0_g1,TRINITY_DN10886…
BP	GO:1901700	response to oxygen-containing compound	327	485	812	2867	1.6e-10	3.83015e-08	TRINITY_DN10007_c0_g1,TRINITY_DN10019_c0_g1,TRINITY_DN10074_c0_g1,TRINITY_DN100869_c0_g1,TRINITY_DN101170_c0_g1,TRINITY_DN10157_c1_g2,TRINITY_DN101651_c0_g1,TRINITY_DN10195_c0_g1,TRINITY_DN1026_c0_g1,TRINITY_DN10301_c0_g1,TRINITY_DN103505_c0_g1,TRINITY_DN103968_c0_g1,TRINITY_DN10422_c0_g1,TRINITY_DN10462_c0_g1,TRINITY_DN10603_c0_g2,TRINITY_DN10645_c0_g1,TRINITY_DN10681_c0_g1,TRINITY_DN10781_c0_g1…	TRINITY_DN100489_c0_g1,TRINITY_DN100625_c0_g1,TRINITY_DN100633_c0_g1,TRINITY_DN10129_c0_g2,TRINITY_DN10159_c0_g1,TRINITY_DN10291_c2_g1,TRINITY_DN10291_c2_g3,TRINITY_DN1031_c0_g1,TRINITY_DN103491_c0_g1,TRINITY_DN10384_c0_g1,TRINITY_DN103891_c0_g1,TRINITY_DN10436_c0_g1,TRINITY_DN1045_c0_g1,TRINITY_DN104775_c0_g1,TRINITY_DN105270_c0_g1,TRINITY_DN10591_c0_g1,TRINITY_DN10596_c0_g1,TRINITY_DN1065_c0_g1…
MF	GO:0004497	monooxygenase activity	47	58	105	250	2.1e-10	4.9014e-08	TRINITY_DN100945_c0_g1,TRINITY_DN10133_c0_g1,TRINITY_DN104720_c0_g1,TRINITY_DN10602_c0_g1,TRINITY_DN108371_c0_g1,TRINITY_DN11022_c0_g1,TRINITY_DN11172_c0_g1,TRINITY_DN112015_c0_g1,TRINITY_DN12108_c0_g1,TRINITY_DN12615_c0_g1,TRINITY_DN14968_c0_g1,TRINITY_DN1568_c0_g2,TRINITY_DN15_c0_g1,TRINITY_DN17184_c0_g1,TRINITY_DN17239_c0_g1,TRINITY_DN17910_c0_g1,TRINITY_DN18384_c0_g2,TRINITY_DN18452_c0_g1,TRI…	TRINITY_DN10012_c0_g1,TRINITY_DN100902_c0_g1,TRINITY_DN10180_c0_g1,TRINITY_DN10425_c1_g1,TRINITY_DN10437_c0_g1,TRINITY_DN1045_c0_g1,TRINITY_DN10886_c0_g1,TRINITY_DN110712_c0_g1,TRINITY_DN11526_c0_g1,TRINITY_DN119668_c0_g1,TRINITY_DN120740_c0_g1,TRINITY_DN12110_c0_g1,TRINITY_DN1407_c0_g1,TRINITY_DN15581_c0_g1,TRINITY_DN15_c0_g2,TRINITY_DN15_c2_g1,TRINITY_DN16791_c0_g1,TRINITY_DN17768_c0_g1,TRINITY…
BP	GO:0019748	secondary metabolic process	75	111	186	522	2.3e-10	5.23727e-08	TRINITY_DN10301_c0_g1,TRINITY_DN10459_c0_g1,TRINITY_DN10508_c0_g1,TRINITY_DN10778_c0_g1,TRINITY_DN108371_c0_g1,TRINITY_DN109726_c0_g1,TRINITY_DN11008_c0_g1,TRINITY_DN11022_c0_g1,TRINITY_DN11597_c0_g1,TRINITY_DN1171_c1_g1,TRINITY_DN120433_c0_g1,TRINITY_DN12108_c0_g1,TRINITY_DN12200_c0_g2,TRINITY_DN13132_c0_g1,TRINITY_DN13210_c0_g1,TRINITY_DN13210_c0_g2,TRINITY_DN13593_c0_g1,TRINITY_DN13708_c1_g1,T…	TRINITY_DN10012_c0_g1,TRINITY_DN100700_c0_g1,TRINITY_DN100902_c0_g1,TRINITY_DN10591_c0_g1,TRINITY_DN10778_c1_g1,TRINITY_DN109508_c0_g1,TRINITY_DN112628_c0_g1,TRINITY_DN11293_c0_g1,TRINITY_DN11871_c0_g1,TRINITY_DN12248_c0_g1,TRINITY_DN12747_c0_g1,TRINITY_DN13012_c0_g1,TRINITY_DN13257_c0_g1,TRINITY_DN14001_c0_g1,TRINITY_DN14117_c0_g1,TRINITY_DN14130_c0_g1,TRINITY_DN14256_c0_g1,TRINITY_DN14467_c0_g1…
BP	GO:0042274	ribosomal small subunit biogenesis	2	90	92	214	2.4e-10	5.33486e-08	TRINITY_DN6901_c0_g1,TRINITY_DN8617_c0_g1	TRINITY_DN100728_c0_g1,TRINITY_DN100883_c0_g1,TRINITY_DN100983_c0_g1,TRINITY_DN101058_c0_g1,TRINITY_DN102475_c0_g1,TRINITY_DN103539_c0_g1,TRINITY_DN104072_c0_g1,TRINITY_DN104776_c0_g1,TRINITY_DN104828_c0_g1,TRINITY_DN106752_c0_g1,TRINITY_DN10815_c0_g3,TRINITY_DN108639_c0_g1,TRINITY_DN109215_c0_g1,TRINITY_DN112001_c0_g1,TRINITY_DN112562_c0_g1,TRINITY_DN112713_c0_g1,TRINITY_DN113836_c0_g1,TRINITY_D…
CC	GO:0009579	thylakoid	136	105	241	727	7.7e-10	1.6718e-07	TRINITY_DN10043_c0_g1,TRINITY_DN10074_c0_g1,TRINITY_DN10198_c0_g1,TRINITY_DN10361_c0_g1,TRINITY_DN103968_c0_g1,TRINITY_DN10618_c0_g1,TRINITY_DN10781_c0_g1,TRINITY_DN10840_c0_g1,TRINITY_DN11090_c1_g1,TRINITY_DN112015_c0_g1,TRINITY_DN112393_c0_g1,TRINITY_DN11424_c0_g1,TRINITY_DN11424_c0_g2,TRINITY_DN11519_c0_g1,TRINITY_DN11701_c0_g1,TRINITY_DN11954_c0_g1,TRINITY_DN11988_c0_g1,TRINITY_DN12003_c0_g1,…	TRINITY_DN100343_c0_g1,TRINITY_DN100690_c0_g1,TRINITY_DN100955_c0_g1,TRINITY_DN10625_c0_g1,TRINITY_DN107909_c0_g1,TRINITY_DN10831_c0_g1,TRINITY_DN114761_c0_g1,TRINITY_DN116937_c0_g1,TRINITY_DN1169_c0_g2,TRINITY_DN118059_c0_g1,TRINITY_DN119195_c0_g1,TRINITY_DN12219_c0_g1,TRINITY_DN122727_c0_g1,TRINITY_DN12676_c0_g1,TRINITY_DN12748_c0_g1,TRINITY_DN12997_c0_g1,TRINITY_DN13381_c0_g3,TRINITY_DN13961_c…
MF	GO:0016705	oxidoreductase activity, acting on paired donors, with incorporation or reduction of molecular oxygen	58	75	133	345	9.3e-10	1.92944e-07	TRINITY_DN100945_c0_g1,TRINITY_DN10133_c0_g1,TRINITY_DN104720_c0_g1,TRINITY_DN10602_c0_g1,TRINITY_DN108096_c0_g1,TRINITY_DN108371_c0_g1,TRINITY_DN11022_c0_g1,TRINITY_DN11172_c0_g1,TRINITY_DN11342_c0_g1,TRINITY_DN11608_c0_g2,TRINITY_DN12108_c0_g1,TRINITY_DN12615_c0_g1,TRINITY_DN12766_c1_g1,TRINITY_DN13471_c0_g1,TRINITY_DN14968_c0_g1,TRINITY_DN15409_c0_g1,TRINITY_DN1568_c0_g2,TRINITY_DN15_c0_g1,TRI…	TRINITY_DN10012_c0_g1,TRINITY_DN100902_c0_g1,TRINITY_DN10180_c0_g1,TRINITY_DN10437_c0_g1,TRINITY_DN1045_c0_g1,TRINITY_DN10591_c0_g1,TRINITY_DN10886_c0_g1,TRINITY_DN112600_c0_g1,TRINITY_DN120740_c0_g1,TRINITY_DN12328_c0_g1,TRINITY_DN12766_c0_g1,TRINITY_DN12766_c0_g2,TRINITY_DN13588_c0_g1,TRINITY_DN1407_c0_g1,TRINITY_DN14238_c0_g1,TRINITY_DN15581_c0_g1,TRINITY_DN15_c0_g2,TRINITY_DN15_c2_g1,TRINITY_…
BP	GO:0000028	ribosomal small subunit assembly	1	54	55	109	9.3e-10	1.92944e-07	TRINITY_DN8617_c0_g1	TRINITY_DN100728_c0_g1,TRINITY_DN100883_c0_g1,TRINITY_DN101058_c0_g1,TRINITY_DN102475_c0_g1,TRINITY_DN106752_c0_g1,TRINITY_DN10815_c0_g3,TRINITY_DN116373_c0_g1,TRINITY_DN116671_c0_g1,TRINITY_DN117275_c0_g1,TRINITY_DN120391_c0_g1,TRINITY_DN120622_c0_g1,TRINITY_DN121070_c0_g1,TRINITY_DN121582_c0_g1,TRINITY_DN122258_c0_g1,TRINITY_DN12337_c0_g1,TRINITY_DN12337_c0_g2,TRINITY_DN13312_c0_g2,TRINITY_DN14…
BP	GO:0042493	response to drug	112	240	352	1132	1.7e-09	3.45026e-07	TRINITY_DN10195_c0_g1,TRINITY_DN10248_c0_g3,TRINITY_DN1026_c0_g1,TRINITY_DN10301_c0_g1,TRINITY_DN103968_c0_g1,TRINITY_DN10422_c0_g1,TRINITY_DN10645_c0_g1,TRINITY_DN108872_c0_g1,TRINITY_DN10917_c0_g1,TRINITY_DN10918_c0_g1,TRINITY_DN11050_c0_g1,TRINITY_DN11083_c0_g1,TRINITY_DN1113_c0_g3,TRINITY_DN113401_c0_g1,TRINITY_DN11355_c0_g1,TRINITY_DN11533_c1_g1,TRINITY_DN116417_c0_g1,TRINITY_DN1171_c1_g1,TR…	TRINITY_DN100625_c0_g1,TRINITY_DN10159_c0_g1,TRINITY_DN103491_c0_g1,TRINITY_DN10436_c0_g1,TRINITY_DN104516_c0_g1,TRINITY_DN104775_c0_g1,TRINITY_DN108440_c0_g1,TRINITY_DN10921_c0_g1,TRINITY_DN109375_c0_g1,TRINITY_DN11072_c0_g1,TRINITY_DN11148_c0_g1,TRINITY_DN113263_c0_g1,TRINITY_DN11367_c0_g1,TRINITY_DN11383_c0_g1,TRINITY_DN11395_c0_g1,TRINITY_DN115350_c0_g1,TRINITY_DN115576_c0_g1,TRINITY_DN11712_…
BP	GO:0017144	drug metabolic process	96	297	393	1290	2.9e-09	5.76051e-07	TRINITY_DN10074_c0_g1,TRINITY_DN108313_c0_g1,TRINITY_DN109104_c0_g1,TRINITY_DN10978_c0_g2,TRINITY_DN11387_c0_g1,TRINITY_DN11417_c0_g2,TRINITY_DN11424_c0_g1,TRINITY_DN11424_c0_g2,TRINITY_DN11597_c0_g1,TRINITY_DN12224_c0_g1,TRINITY_DN12665_c0_g1,TRINITY_DN13114_c0_g1,TRINITY_DN13359_c0_g1,TRINITY_DN13574_c0_g1,TRINITY_DN13600_c0_g1,TRINITY_DN13689_c0_g1,TRINITY_DN13840_c0_g1,TRINITY_DN15424_c0_g1,T…	TRINITY_DN100563_c0_g1,TRINITY_DN100601_c0_g1,TRINITY_DN101674_c0_g1,TRINITY_DN10169_c0_g1,TRINITY_DN103933_c0_g1,TRINITY_DN104775_c0_g1,TRINITY_DN106121_c0_g1,TRINITY_DN1065_c0_g1,TRINITY_DN10761_c0_g1,TRINITY_DN107701_c0_g1,TRINITY_DN107707_c0_g1,TRINITY_DN107841_c0_g1,TRINITY_DN10831_c0_g1,TRINITY_DN109180_c0_g1,TRINITY_DN109551_c0_g1,TRINITY_DN11038_c0_g1,TRINITY_DN111266_c0_g1,TRINITY_DN1119…
CC	GO:0009535	chloroplast thylakoid membrane	112	67	179	519	4.7e-09	9.1415e-07	TRINITY_DN10043_c0_g1,TRINITY_DN10074_c0_g1,TRINITY_DN10198_c0_g1,TRINITY_DN10361_c0_g1,TRINITY_DN10618_c0_g1,TRINITY_DN10840_c0_g1,TRINITY_DN11090_c1_g1,TRINITY_DN112015_c0_g1,TRINITY_DN112393_c0_g1,TRINITY_DN11954_c0_g1,TRINITY_DN11988_c0_g1,TRINITY_DN12003_c0_g1,TRINITY_DN12044_c0_g1,TRINITY_DN12119_c0_g1,TRINITY_DN12179_c0_g1,TRINITY_DN121857_c0_g1,TRINITY_DN12277_c0_g1,TRINITY_DN12432_c0_g1,…	TRINITY_DN100343_c0_g1,TRINITY_DN100690_c0_g1,TRINITY_DN107909_c0_g1,TRINITY_DN10831_c0_g1,TRINITY_DN114761_c0_g1,TRINITY_DN1169_c0_g2,TRINITY_DN122727_c0_g1,TRINITY_DN12676_c0_g1,TRINITY_DN12748_c0_g1,TRINITY_DN14608_c0_g2,TRINITY_DN1582_c2_g1,TRINITY_DN17170_c0_g2,TRINITY_DN17652_c0_g1,TRINITY_DN17905_c0_g2,TRINITY_DN17908_c0_g1,TRINITY_DN17929_c0_g1,TRINITY_DN18141_c0_g1,TRINITY_DN18149_c0_g1,…
CC	GO:0055035	plastid thylakoid membrane	112	67	179	520	5.5e-09	1.04792e-06	TRINITY_DN10043_c0_g1,TRINITY_DN10074_c0_g1,TRINITY_DN10198_c0_g1,TRINITY_DN10361_c0_g1,TRINITY_DN10618_c0_g1,TRINITY_DN10840_c0_g1,TRINITY_DN11090_c1_g1,TRINITY_DN112015_c0_g1,TRINITY_DN112393_c0_g1,TRINITY_DN11954_c0_g1,TRINITY_DN11988_c0_g1,TRINITY_DN12003_c0_g1,TRINITY_DN12044_c0_g1,TRINITY_DN12119_c0_g1,TRINITY_DN12179_c0_g1,TRINITY_DN121857_c0_g1,TRINITY_DN12277_c0_g1,TRINITY_DN12432_c0_g1,…	TRINITY_DN100343_c0_g1,TRINITY_DN100690_c0_g1,TRINITY_DN107909_c0_g1,TRINITY_DN10831_c0_g1,TRINITY_DN114761_c0_g1,TRINITY_DN1169_c0_g2,TRINITY_DN122727_c0_g1,TRINITY_DN12676_c0_g1,TRINITY_DN12748_c0_g1,TRINITY_DN14608_c0_g2,TRINITY_DN1582_c2_g1,TRINITY_DN17170_c0_g2,TRINITY_DN17652_c0_g1,TRINITY_DN17905_c0_g2,TRINITY_DN17908_c0_g1,TRINITY_DN17929_c0_g1,TRINITY_DN18141_c0_g1,TRINITY_DN18149_c0_g1,…
BP	GO:0044550	secondary metabolite biosynthetic process	44	73	117	308	8.7e-09	1.62446e-06	TRINITY_DN10508_c0_g1,TRINITY_DN108371_c0_g1,TRINITY_DN11008_c0_g1,TRINITY_DN11022_c0_g1,TRINITY_DN11597_c0_g1,TRINITY_DN1171_c1_g1,TRINITY_DN120433_c0_g1,TRINITY_DN12108_c0_g1,TRINITY_DN12200_c0_g2,TRINITY_DN13132_c0_g1,TRINITY_DN13593_c0_g1,TRINITY_DN14968_c0_g1,TRINITY_DN15640_c0_g1,TRINITY_DN17163_c0_g1,TRINITY_DN17184_c0_g1,TRINITY_DN17910_c0_g1,TRINITY_DN18384_c0_g2,TRINITY_DN18452_c0_g1,TR…	TRINITY_DN10012_c0_g1,TRINITY_DN100902_c0_g1,TRINITY_DN10591_c0_g1,TRINITY_DN11293_c0_g1,TRINITY_DN11871_c0_g1,TRINITY_DN12747_c0_g1,TRINITY_DN13257_c0_g1,TRINITY_DN14001_c0_g1,TRINITY_DN14117_c0_g1,TRINITY_DN14130_c0_g1,TRINITY_DN14256_c0_g1,TRINITY_DN14467_c0_g1,TRINITY_DN15_c2_g1,TRINITY_DN1689_c0_g1,TRINITY_DN17768_c0_g1,TRINITY_DN17917_c0_g1,TRINITY_DN18607_c0_g1,TRINITY_DN1868_c0_g2,TRINITY…
BP	GO:0046686	response to cadmium ion	48	213	261	815	1.3e-08	2.37976e-06	TRINITY_DN103505_c0_g1,TRINITY_DN10422_c0_g1,TRINITY_DN10636_c0_g1,TRINITY_DN1094_c0_g1,TRINITY_DN112015_c0_g1,TRINITY_DN11424_c0_g1,TRINITY_DN11424_c0_g2,TRINITY_DN11519_c0_g1,TRINITY_DN11841_c0_g1,TRINITY_DN130_c0_g2,TRINITY_DN13574_c0_g1,TRINITY_DN13924_c2_g1,TRINITY_DN14811_c0_g1,TRINITY_DN15097_c0_g1,TRINITY_DN15963_c0_g1,TRINITY_DN17109_c0_g1,TRINITY_DN17899_c0_g1,TRINITY_DN17923_c0_g4,TRIN…	TRINITY_DN100406_c0_g1,TRINITY_DN100955_c0_g1,TRINITY_DN10129_c0_g2,TRINITY_DN103933_c0_g1,TRINITY_DN104264_c0_g1,TRINITY_DN105009_c0_g1,TRINITY_DN107707_c0_g1,TRINITY_DN10773_c0_g1,TRINITY_DN107841_c0_g1,TRINITY_DN108337_c0_g1,TRINITY_DN108361_c0_g1,TRINITY_DN108440_c0_g1,TRINITY_DN10922_c0_g1,TRINITY_DN10949_c0_g1,TRINITY_DN110319_c0_g1,TRINITY_DN112120_c0_g1,TRINITY_DN112146_c0_g1,TRINITY_DN11…
BP	GO:0010038	response to metal ion	70	265	335	1088	1.4e-08	2.46611e-06	TRINITY_DN103505_c0_g1,TRINITY_DN10422_c0_g1,TRINITY_DN10636_c0_g1,TRINITY_DN1094_c0_g1,TRINITY_DN112015_c0_g1,TRINITY_DN11424_c0_g1,TRINITY_DN11424_c0_g2,TRINITY_DN11519_c0_g1,TRINITY_DN11841_c0_g1,TRINITY_DN130_c0_g2,TRINITY_DN13574_c0_g1,TRINITY_DN13916_c0_g1,TRINITY_DN13924_c2_g1,TRINITY_DN14076_c0_g1,TRINITY_DN14214_c0_g1,TRINITY_DN14214_c0_g2,TRINITY_DN14811_c0_g1,TRINITY_DN15097_c0_g1,TRIN…	TRINITY_DN100406_c0_g1,TRINITY_DN100902_c0_g1,TRINITY_DN100955_c0_g1,TRINITY_DN10129_c0_g2,TRINITY_DN10291_c2_g1,TRINITY_DN10291_c2_g3,TRINITY_DN103933_c0_g1,TRINITY_DN104264_c0_g1,TRINITY_DN104775_c0_g1,TRINITY_DN105009_c0_g1,TRINITY_DN107707_c0_g1,TRINITY_DN10773_c0_g1,TRINITY_DN107841_c0_g1,TRINITY_DN10802_c0_g1,TRINITY_DN108337_c0_g1,TRINITY_DN108361_c0_g1,TRINITY_DN108440_c0_g1,TRINITY_DN109…
CC	GO:0034357	photosynthetic membrane	114	69	183	540	1.4e-08	2.46611e-06	TRINITY_DN10043_c0_g1,TRINITY_DN10074_c0_g1,TRINITY_DN10198_c0_g1,TRINITY_DN10361_c0_g1,TRINITY_DN10618_c0_g1,TRINITY_DN10840_c0_g1,TRINITY_DN11090_c1_g1,TRINITY_DN112015_c0_g1,TRINITY_DN112393_c0_g1,TRINITY_DN11954_c0_g1,TRINITY_DN11988_c0_g1,TRINITY_DN12003_c0_g1,TRINITY_DN12044_c0_g1,TRINITY_DN12119_c0_g1,TRINITY_DN12179_c0_g1,TRINITY_DN121857_c0_g1,TRINITY_DN12277_c0_g1,TRINITY_DN12432_c0_g1,…	TRINITY_DN100343_c0_g1,TRINITY_DN100690_c0_g1,TRINITY_DN107909_c0_g1,TRINITY_DN10831_c0_g1,TRINITY_DN114761_c0_g1,TRINITY_DN1169_c0_g2,TRINITY_DN118059_c0_g1,TRINITY_DN122727_c0_g1,TRINITY_DN12676_c0_g1,TRINITY_DN12748_c0_g1,TRINITY_DN14608_c0_g2,TRINITY_DN1582_c2_g1,TRINITY_DN17170_c0_g2,TRINITY_DN17652_c0_g1,TRINITY_DN17905_c0_g2,TRINITY_DN17908_c0_g1,TRINITY_DN17929_c0_g1,TRINITY_DN18008_c0_g1…
BP	GO:0006952	defense response	185	405	590	2062	1.6e-08	2.76622e-06	TRINITY_DN10082_c0_g1,TRINITY_DN100869_c0_g1,TRINITY_DN1026_c0_g1,TRINITY_DN103505_c0_g1,TRINITY_DN104720_c0_g1,TRINITY_DN10645_c0_g1,TRINITY_DN10700_c0_g2,TRINITY_DN10704_c0_g1,TRINITY_DN108313_c0_g1,TRINITY_DN109104_c0_g1,TRINITY_DN10975_c0_g1,TRINITY_DN10975_c0_g2,TRINITY_DN10981_c0_g1,TRINITY_DN10993_c0_g1,TRINITY_DN11022_c0_g1,TRINITY_DN11050_c0_g1,TRINITY_DN1108_c0_g1,TRINITY_DN11090_c1_g1,…	TRINITY_DN100242_c0_g1,TRINITY_DN100389_c0_g1,TRINITY_DN100951_c0_g1,TRINITY_DN101198_c0_g1,TRINITY_DN10159_c0_g1,TRINITY_DN101686_c0_g1,TRINITY_DN10217_c0_g1,TRINITY_DN102_c0_g4,TRINITY_DN102_c1_g1,TRINITY_DN103491_c0_g1,TRINITY_DN103536_c0_g1,TRINITY_DN103565_c0_g1,TRINITY_DN103925_c0_g1,TRINITY_DN104264_c0_g1,TRINITY_DN10436_c0_g1,TRINITY_DN10460_c0_g1,TRINITY_DN104948_c0_g1,TRINITY_DN1065_c0_…
BP	GO:0006979	response to oxidative stress	71	189	260	815	2e-08	3.39491e-06	TRINITY_DN10074_c0_g1,TRINITY_DN101651_c0_g1,TRINITY_DN10781_c0_g1,TRINITY_DN108313_c0_g1,TRINITY_DN11050_c0_g1,TRINITY_DN11327_c0_g1,TRINITY_DN11643_c0_g1,TRINITY_DN11643_c0_g2,TRINITY_DN1174_c2_g1,TRINITY_DN12665_c0_g1,TRINITY_DN12766_c1_g1,TRINITY_DN13359_c0_g1,TRINITY_DN13528_c0_g1,TRINITY_DN13689_c0_g1,TRINITY_DN13916_c0_g1,TRINITY_DN1409_c0_g1,TRINITY_DN15097_c0_g1,TRINITY_DN15424_c0_g1,TRI…	TRINITY_DN100489_c0_g1,TRINITY_DN10159_c0_g1,TRINITY_DN103491_c0_g1,TRINITY_DN103891_c0_g1,TRINITY_DN103925_c0_g1,TRINITY_DN10436_c0_g1,TRINITY_DN104775_c0_g1,TRINITY_DN10625_c0_g1,TRINITY_DN107924_c0_g1,TRINITY_DN10831_c0_g1,TRINITY_DN108440_c0_g1,TRINITY_DN109069_c0_g1,TRINITY_DN10921_c0_g1,TRINITY_DN10922_c0_g1,TRINITY_DN109508_c0_g1,TRINITY_DN11190_c0_g1,TRINITY_DN113263_c0_g1,TRINITY_DN11383…
MF	GO:0004197	cysteine-type endopeptidase activity	6	61	67	150	2.1e-08	3.501e-06	TRINITY_DN105495_c0_g1,TRINITY_DN14214_c0_g1,TRINITY_DN14214_c0_g2,TRINITY_DN4561_c0_g2,TRINITY_DN66081_c0_g2,TRINITY_DN6756_c0_g1	TRINITY_DN100951_c0_g1,TRINITY_DN103536_c0_g1,TRINITY_DN103565_c0_g1,TRINITY_DN104876_c0_g1,TRINITY_DN112199_c0_g1,TRINITY_DN112390_c0_g1,TRINITY_DN112443_c0_g1,TRINITY_DN113152_c0_g1,TRINITY_DN113263_c0_g1,TRINITY_DN114491_c0_g1,TRINITY_DN116216_c0_g1,TRINITY_DN11712_c0_g1,TRINITY_DN11975_c0_g1,TRINITY_DN121696_c0_g1,TRINITY_DN123395_c0_g1,TRINITY_DN13823_c0_g1,TRINITY_DN13823_c0_g2,TRINITY_DN13…
BP	GO:0009725	response to hormone	304	508	812	2938	2.3e-08	3.76716e-06	TRINITY_DN10007_c0_g1,TRINITY_DN100869_c0_g1,TRINITY_DN10157_c1_g2,TRINITY_DN101651_c0_g1,TRINITY_DN1026_c0_g1,TRINITY_DN10301_c0_g1,TRINITY_DN10318_c0_g1,TRINITY_DN103505_c0_g1,TRINITY_DN103968_c0_g1,TRINITY_DN10401_c0_g1,TRINITY_DN10422_c0_g1,TRINITY_DN10457_c0_g1,TRINITY_DN10459_c0_g1,TRINITY_DN10462_c0_g1,TRINITY_DN10645_c0_g1,TRINITY_DN10681_c0_g1,TRINITY_DN10700_c0_g2,TRINITY_DN10781_c0_g1,…	TRINITY_DN100343_c0_g1,TRINITY_DN100489_c0_g1,TRINITY_DN100544_c0_g1,TRINITY_DN100633_c0_g1,TRINITY_DN100955_c0_g1,TRINITY_DN10129_c0_g2,TRINITY_DN10159_c0_g1,TRINITY_DN10203_c0_g1,TRINITY_DN10291_c2_g1,TRINITY_DN10291_c2_g3,TRINITY_DN1031_c0_g1,TRINITY_DN103536_c0_g1,TRINITY_DN103565_c0_g1,TRINITY_DN10384_c0_g1,TRINITY_DN103891_c0_g1,TRINITY_DN103933_c0_g1,TRINITY_DN104341_c0_g1,TRINITY_DN1045_c…
CC	GO:0005886	plasma membrane	297	995	1292	4907	2.8e-08	4.50703e-06	TRINITY_DN100869_c0_g1,TRINITY_DN101170_c0_g1,TRINITY_DN10157_c1_g1,TRINITY_DN10157_c1_g2,TRINITY_DN10248_c0_g3,TRINITY_DN10248_c0_g4,TRINITY_DN10263_c0_g1,TRINITY_DN10318_c0_g1,TRINITY_DN103505_c0_g1,TRINITY_DN103509_c0_g1,TRINITY_DN103517_c0_g1,TRINITY_DN10429_c0_g1,TRINITY_DN1044_c0_g1,TRINITY_DN105326_c0_g1,TRINITY_DN10534_c0_g1,TRINITY_DN10775_c0_g1,TRINITY_DN107776_c0_g1,TRINITY_DN108371_c0…	TRINITY_DN100136_c0_g1,TRINITY_DN100389_c0_g1,TRINITY_DN100489_c0_g1,TRINITY_DN100493_c0_g1,TRINITY_DN100577_c0_g1,TRINITY_DN100700_c0_g1,TRINITY_DN100728_c0_g1,TRINITY_DN100955_c0_g1,TRINITY_DN100983_c0_g1,TRINITY_DN101198_c0_g1,TRINITY_DN10129_c0_g2,TRINITY_DN10135_c0_g2,TRINITY_DN10159_c0_g1,TRINITY_DN101614_c0_g1,TRINITY_DN101674_c0_g1,TRINITY_DN10203_c0_g1,TRINITY_DN10229_c0_g1,TRINITY_DN102…
CC	GO:0042651	thylakoid membrane	114	67	181	538	3e-08	4.74712e-06	TRINITY_DN10043_c0_g1,TRINITY_DN10074_c0_g1,TRINITY_DN10198_c0_g1,TRINITY_DN10361_c0_g1,TRINITY_DN10618_c0_g1,TRINITY_DN10840_c0_g1,TRINITY_DN11090_c1_g1,TRINITY_DN112015_c0_g1,TRINITY_DN112393_c0_g1,TRINITY_DN11954_c0_g1,TRINITY_DN11988_c0_g1,TRINITY_DN12003_c0_g1,TRINITY_DN12044_c0_g1,TRINITY_DN12119_c0_g1,TRINITY_DN12179_c0_g1,TRINITY_DN121857_c0_g1,TRINITY_DN12277_c0_g1,TRINITY_DN12432_c0_g1,…	TRINITY_DN100343_c0_g1,TRINITY_DN100690_c0_g1,TRINITY_DN107909_c0_g1,TRINITY_DN10831_c0_g1,TRINITY_DN114761_c0_g1,TRINITY_DN1169_c0_g2,TRINITY_DN122727_c0_g1,TRINITY_DN12676_c0_g1,TRINITY_DN12748_c0_g1,TRINITY_DN14608_c0_g2,TRINITY_DN1582_c2_g1,TRINITY_DN17170_c0_g2,TRINITY_DN17652_c0_g1,TRINITY_DN17905_c0_g2,TRINITY_DN17908_c0_g1,TRINITY_DN17929_c0_g1,TRINITY_DN18141_c0_g1,TRINITY_DN18149_c0_g1,…
BP	GO:0010033	response to organic substance	357	630	987	3643	3.6e-08	5.6016e-06	TRINITY_DN10007_c0_g1,TRINITY_DN10019_c0_g1,TRINITY_DN100869_c0_g1,TRINITY_DN101170_c0_g1,TRINITY_DN10157_c1_g2,TRINITY_DN101651_c0_g1,TRINITY_DN10195_c0_g1,TRINITY_DN10263_c0_g1,TRINITY_DN1026_c0_g1,TRINITY_DN10301_c0_g1,TRINITY_DN10318_c0_g1,TRINITY_DN103505_c0_g1,TRINITY_DN103968_c0_g1,TRINITY_DN10401_c0_g1,TRINITY_DN10422_c0_g1,TRINITY_DN10457_c0_g1,TRINITY_DN10459_c0_g1,TRINITY_DN10462_c0_g1…	TRINITY_DN100343_c0_g1,TRINITY_DN100489_c0_g1,TRINITY_DN100544_c0_g1,TRINITY_DN100625_c0_g1,TRINITY_DN100633_c0_g1,TRINITY_DN100955_c0_g1,TRINITY_DN10129_c0_g2,TRINITY_DN10159_c0_g1,TRINITY_DN10203_c0_g1,TRINITY_DN102348_c0_g1,TRINITY_DN10291_c2_g1,TRINITY_DN10291_c2_g3,TRINITY_DN1031_c0_g1,TRINITY_DN103536_c0_g1,TRINITY_DN103565_c0_g1,TRINITY_DN10384_c0_g1,TRINITY_DN103891_c0_g1,TRINITY_DN103925…
BP	GO:0006970	response to osmotic stress	103	280	383	1279	4.1e-08	6.27502e-06	TRINITY_DN10019_c0_g1,TRINITY_DN10320_c0_g1,TRINITY_DN10422_c0_g1,TRINITY_DN10427_c0_g1,TRINITY_DN10459_c0_g1,TRINITY_DN10534_c0_g1,TRINITY_DN10563_c0_g1,TRINITY_DN10681_c0_g1,TRINITY_DN10917_c0_g1,TRINITY_DN10918_c0_g1,TRINITY_DN1104_c0_g4,TRINITY_DN110770_c0_g1,TRINITY_DN112157_c0_g1,TRINITY_DN112830_c0_g1,TRINITY_DN11355_c0_g1,TRINITY_DN11519_c0_g1,TRINITY_DN11643_c0_g1,TRINITY_DN11643_c0_g2,T…	TRINITY_DN100489_c0_g1,TRINITY_DN100625_c0_g1,TRINITY_DN100955_c0_g1,TRINITY_DN101036_c0_g1,TRINITY_DN10129_c0_g2,TRINITY_DN103891_c0_g1,TRINITY_DN103933_c0_g1,TRINITY_DN104516_c0_g1,TRINITY_DN105594_c0_g1,TRINITY_DN1065_c0_g1,TRINITY_DN107707_c0_g1,TRINITY_DN107924_c0_g1,TRINITY_DN10802_c0_g1,TRINITY_DN108361_c0_g1,TRINITY_DN108682_c0_g1,TRINITY_DN10949_c0_g1,TRINITY_DN110319_c0_g1,TRINITY_DN111…
BP	GO:0009636	response to toxic substance	70	136	206	626	4.6e-08	6.92671e-06	TRINITY_DN10074_c0_g1,TRINITY_DN108096_c0_g1,TRINITY_DN108313_c0_g1,TRINITY_DN11050_c0_g1,TRINITY_DN1113_c0_g3,TRINITY_DN11519_c0_g1,TRINITY_DN121857_c0_g1,TRINITY_DN12303_c0_g1,TRINITY_DN12665_c0_g1,TRINITY_DN12766_c1_g1,TRINITY_DN13359_c0_g1,TRINITY_DN13528_c0_g1,TRINITY_DN13689_c0_g1,TRINITY_DN1409_c0_g1,TRINITY_DN15097_c0_g1,TRINITY_DN15424_c0_g1,TRINITY_DN15640_c0_g1,TRINITY_DN15654_c0_g1,TR…	TRINITY_DN100489_c0_g1,TRINITY_DN103891_c0_g1,TRINITY_DN10436_c0_g1,TRINITY_DN104775_c0_g1,TRINITY_DN1065_c0_g1,TRINITY_DN107924_c0_g1,TRINITY_DN10831_c0_g1,TRINITY_DN108440_c0_g1,TRINITY_DN10921_c0_g1,TRINITY_DN11148_c0_g1,TRINITY_DN11190_c0_g1,TRINITY_DN111954_c0_g1,TRINITY_DN112613_c0_g1,TRINITY_DN113263_c0_g1,TRINITY_DN11383_c0_g1,TRINITY_DN114002_c0_g1,TRINITY_DN11712_c0_g1,TRINITY_DN1201_c0…
BP	GO:0009607	response to biotic stimulus	186	382	568	1993	5.6e-08	8.29867e-06	TRINITY_DN10019_c0_g1,TRINITY_DN10082_c0_g1,TRINITY_DN100869_c0_g1,TRINITY_DN100945_c0_g1,TRINITY_DN1026_c0_g1,TRINITY_DN103505_c0_g1,TRINITY_DN103968_c0_g1,TRINITY_DN10700_c0_g2,TRINITY_DN108313_c0_g1,TRINITY_DN10895_c0_g1,TRINITY_DN109104_c0_g1,TRINITY_DN10918_c0_g1,TRINITY_DN10975_c0_g1,TRINITY_DN10975_c0_g2,TRINITY_DN10976_c0_g1,TRINITY_DN11008_c0_g1,TRINITY_DN11022_c0_g1,TRINITY_DN11050_c0_g…	TRINITY_DN100242_c0_g1,TRINITY_DN100389_c0_g1,TRINITY_DN100951_c0_g1,TRINITY_DN101198_c0_g1,TRINITY_DN10159_c0_g1,TRINITY_DN101686_c0_g1,TRINITY_DN10217_c0_g1,TRINITY_DN10229_c0_g1,TRINITY_DN102_c0_g4,TRINITY_DN102_c1_g1,TRINITY_DN103491_c0_g1,TRINITY_DN103925_c0_g1,TRINITY_DN104264_c0_g1,TRINITY_DN10460_c0_g1,TRINITY_DN104948_c0_g1,TRINITY_DN105270_c0_g1,TRINITY_DN107883_c0_g1,TRINITY_DN10922_c0…
CC	GO:0009534	chloroplast thylakoid	125	75	200	611	6.2e-08	9.04425e-06	TRINITY_DN10043_c0_g1,TRINITY_DN10074_c0_g1,TRINITY_DN10198_c0_g1,TRINITY_DN10361_c0_g1,TRINITY_DN103968_c0_g1,TRINITY_DN10618_c0_g1,TRINITY_DN10840_c0_g1,TRINITY_DN11090_c1_g1,TRINITY_DN112015_c0_g1,TRINITY_DN112393_c0_g1,TRINITY_DN11424_c0_g2,TRINITY_DN11954_c0_g1,TRINITY_DN11988_c0_g1,TRINITY_DN12003_c0_g1,TRINITY_DN12044_c0_g1,TRINITY_DN12119_c0_g1,TRINITY_DN12179_c0_g1,TRINITY_DN121857_c0_g1…	TRINITY_DN100343_c0_g1,TRINITY_DN100690_c0_g1,TRINITY_DN10625_c0_g1,TRINITY_DN107909_c0_g1,TRINITY_DN10831_c0_g1,TRINITY_DN114761_c0_g1,TRINITY_DN1169_c0_g2,TRINITY_DN118059_c0_g1,TRINITY_DN122727_c0_g1,TRINITY_DN12676_c0_g1,TRINITY_DN12748_c0_g1,TRINITY_DN13961_c0_g1,TRINITY_DN14608_c0_g2,TRINITY_DN1582_c2_g1,TRINITY_DN16893_c0_g1,TRINITY_DN17170_c0_g2,TRINITY_DN17186_c0_g1,TRINITY_DN17652_c0_g1…
CC	GO:0031976	plastid thylakoid	125	75	200	612	7.1e-08	1.01978e-05	TRINITY_DN10043_c0_g1,TRINITY_DN10074_c0_g1,TRINITY_DN10198_c0_g1,TRINITY_DN10361_c0_g1,TRINITY_DN103968_c0_g1,TRINITY_DN10618_c0_g1,TRINITY_DN10840_c0_g1,TRINITY_DN11090_c1_g1,TRINITY_DN112015_c0_g1,TRINITY_DN112393_c0_g1,TRINITY_DN11424_c0_g2,TRINITY_DN11954_c0_g1,TRINITY_DN11988_c0_g1,TRINITY_DN12003_c0_g1,TRINITY_DN12044_c0_g1,TRINITY_DN12119_c0_g1,TRINITY_DN12179_c0_g1,TRINITY_DN121857_c0_g1…	TRINITY_DN100343_c0_g1,TRINITY_DN100690_c0_g1,TRINITY_DN10625_c0_g1,TRINITY_DN107909_c0_g1,TRINITY_DN10831_c0_g1,TRINITY_DN114761_c0_g1,TRINITY_DN1169_c0_g2,TRINITY_DN118059_c0_g1,TRINITY_DN122727_c0_g1,TRINITY_DN12676_c0_g1,TRINITY_DN12748_c0_g1,TRINITY_DN13961_c0_g1,TRINITY_DN14608_c0_g2,TRINITY_DN1582_c2_g1,TRINITY_DN16893_c0_g1,TRINITY_DN17170_c0_g2,TRINITY_DN17186_c0_g1,TRINITY_DN17652_c0_g1…
BP	GO:0016999	antibiotic metabolic process	37	92	129	361	1.1e-07	1.556e-05	TRINITY_DN10074_c0_g1,TRINITY_DN108313_c0_g1,TRINITY_DN11417_c0_g2,TRINITY_DN12224_c0_g1,TRINITY_DN12665_c0_g1,TRINITY_DN13114_c0_g1,TRINITY_DN13359_c0_g1,TRINITY_DN13600_c0_g1,TRINITY_DN13689_c0_g1,TRINITY_DN15424_c0_g1,TRINITY_DN15640_c0_g1,TRINITY_DN1570_c0_g2,TRINITY_DN17575_c0_g1,TRINITY_DN17582_c0_g1,TRINITY_DN1858_c0_g1,TRINITY_DN19717_c0_g1,TRINITY_DN20174_c0_g1,TRINITY_DN22118_c0_g1,TRIN…	TRINITY_DN10169_c0_g1,TRINITY_DN103933_c0_g1,TRINITY_DN106121_c0_g1,TRINITY_DN1065_c0_g1,TRINITY_DN10831_c0_g1,TRINITY_DN111266_c0_g1,TRINITY_DN11190_c0_g1,TRINITY_DN11707_c0_g1,TRINITY_DN1201_c0_g1,TRINITY_DN1201_c0_g3,TRINITY_DN12301_c0_g1,TRINITY_DN123668_c0_g1,TRINITY_DN12491_c0_g1,TRINITY_DN13352_c0_g1,TRINITY_DN13957_c1_g1,TRINITY_DN14280_c0_g1,TRINITY_DN14280_c1_g1,TRINITY_DN14287_c0_g1,TR…
BP	GO:0009719	response to endogenous stimulus	307	521	828	3028	1.2e-07	1.67212e-05	TRINITY_DN10007_c0_g1,TRINITY_DN100869_c0_g1,TRINITY_DN10157_c1_g2,TRINITY_DN101651_c0_g1,TRINITY_DN1026_c0_g1,TRINITY_DN10301_c0_g1,TRINITY_DN10318_c0_g1,TRINITY_DN103505_c0_g1,TRINITY_DN103968_c0_g1,TRINITY_DN10401_c0_g1,TRINITY_DN10422_c0_g1,TRINITY_DN10457_c0_g1,TRINITY_DN10459_c0_g1,TRINITY_DN10462_c0_g1,TRINITY_DN10645_c0_g1,TRINITY_DN10681_c0_g1,TRINITY_DN10700_c0_g2,TRINITY_DN10781_c0_g1,…	TRINITY_DN100343_c0_g1,TRINITY_DN100489_c0_g1,TRINITY_DN100544_c0_g1,TRINITY_DN100633_c0_g1,TRINITY_DN100955_c0_g1,TRINITY_DN10129_c0_g2,TRINITY_DN10159_c0_g1,TRINITY_DN10203_c0_g1,TRINITY_DN102348_c0_g1,TRINITY_DN10291_c2_g1,TRINITY_DN10291_c2_g3,TRINITY_DN1031_c0_g1,TRINITY_DN103536_c0_g1,TRINITY_DN103565_c0_g1,TRINITY_DN10384_c0_g1,TRINITY_DN103891_c0_g1,TRINITY_DN103933_c0_g1,TRINITY_DN104341…
CC	GO:0016020	membrane	682	1851	2533	10132	1.4e-07	1.92212e-05	TRINITY_DN10043_c0_g1,TRINITY_DN1005_c0_g1,TRINITY_DN10074_c0_g1,TRINITY_DN100869_c0_g1,TRINITY_DN101170_c0_g1,TRINITY_DN10133_c0_g1,TRINITY_DN10157_c1_g1,TRINITY_DN10157_c1_g2,TRINITY_DN101651_c0_g1,TRINITY_DN10179_c0_g1,TRINITY_DN10198_c0_g1,TRINITY_DN10248_c0_g3,TRINITY_DN10248_c0_g4,TRINITY_DN10263_c0_g1,TRINITY_DN10318_c0_g1,TRINITY_DN103505_c0_g1,TRINITY_DN103509_c0_g1,TRINITY_DN103517_c0_g…	TRINITY_DN10012_c0_g1,TRINITY_DN100136_c0_g1,TRINITY_DN100343_c0_g1,TRINITY_DN100384_c0_g1,TRINITY_DN100389_c0_g1,TRINITY_DN100489_c0_g1,TRINITY_DN100493_c0_g1,TRINITY_DN100577_c0_g1,TRINITY_DN100601_c0_g1,TRINITY_DN100633_c0_g1,TRINITY_DN100690_c0_g1,TRINITY_DN100700_c0_g1,TRINITY_DN100728_c0_g1,TRINITY_DN100765_c0_g1,TRINITY_DN100860_c0_g1,TRINITY_DN100902_c0_g1,TRINITY_DN100955_c0_g1,TRINITY_D…
BP	GO:0044419	interspecies interaction between organisms	184	425	609	2168	1.7e-07	2.30017e-05	TRINITY_DN10019_c0_g1,TRINITY_DN10082_c0_g1,TRINITY_DN100869_c0_g1,TRINITY_DN100945_c0_g1,TRINITY_DN1026_c0_g1,TRINITY_DN10320_c0_g1,TRINITY_DN103505_c0_g1,TRINITY_DN103968_c0_g1,TRINITY_DN10700_c0_g2,TRINITY_DN108313_c0_g1,TRINITY_DN10895_c0_g1,TRINITY_DN109104_c0_g1,TRINITY_DN10918_c0_g1,TRINITY_DN10975_c0_g1,TRINITY_DN10975_c0_g2,TRINITY_DN10976_c0_g1,TRINITY_DN11008_c0_g1,TRINITY_DN11022_c0_g…	TRINITY_DN100389_c0_g1,TRINITY_DN100951_c0_g1,TRINITY_DN101198_c0_g1,TRINITY_DN10159_c0_g1,TRINITY_DN101686_c0_g1,TRINITY_DN10217_c0_g1,TRINITY_DN10229_c0_g1,TRINITY_DN102_c0_g4,TRINITY_DN102_c1_g1,TRINITY_DN103491_c0_g1,TRINITY_DN103536_c0_g1,TRINITY_DN103565_c0_g1,TRINITY_DN103925_c0_g1,TRINITY_DN104264_c0_g1,TRINITY_DN104493_c0_g1,TRINITY_DN10460_c0_g1,TRINITY_DN104948_c0_g1,TRINITY_DN105270_c…
BP	GO:0009651	response to salt stress	91	250	341	1138	2.2e-07	2.93417e-05	TRINITY_DN10019_c0_g1,TRINITY_DN10320_c0_g1,TRINITY_DN10422_c0_g1,TRINITY_DN10427_c0_g1,TRINITY_DN10459_c0_g1,TRINITY_DN10534_c0_g1,TRINITY_DN10563_c0_g1,TRINITY_DN1104_c0_g4,TRINITY_DN110770_c0_g1,TRINITY_DN112157_c0_g1,TRINITY_DN112830_c0_g1,TRINITY_DN11355_c0_g1,TRINITY_DN11519_c0_g1,TRINITY_DN11643_c0_g1,TRINITY_DN11643_c0_g2,TRINITY_DN1171_c1_g1,TRINITY_DN1174_c2_g1,TRINITY_DN1179_c0_g2,TRIN…	TRINITY_DN100489_c0_g1,TRINITY_DN100625_c0_g1,TRINITY_DN100955_c0_g1,TRINITY_DN101036_c0_g1,TRINITY_DN10129_c0_g2,TRINITY_DN103891_c0_g1,TRINITY_DN103933_c0_g1,TRINITY_DN105594_c0_g1,TRINITY_DN107707_c0_g1,TRINITY_DN107924_c0_g1,TRINITY_DN108361_c0_g1,TRINITY_DN108682_c0_g1,TRINITY_DN10949_c0_g1,TRINITY_DN110319_c0_g1,TRINITY_DN11190_c0_g1,TRINITY_DN112378_c0_g1,TRINITY_DN112409_c0_g1,TRINITY_DN1…
BP	GO:0002181	cytoplasmic translation	1	97	98	262	3.2e-07	4.20777e-05	TRINITY_DN6901_c0_g1	TRINITY_DN103539_c0_g1,TRINITY_DN104203_c0_g1,TRINITY_DN104627_c0_g1,TRINITY_DN104775_c0_g1,TRINITY_DN104776_c0_g1,TRINITY_DN104828_c0_g1,TRINITY_DN105594_c0_g1,TRINITY_DN105975_c0_g1,TRINITY_DN106761_c0_g1,TRINITY_DN106977_c0_g1,TRINITY_DN10815_c0_g2,TRINITY_DN108558_c0_g1,TRINITY_DN109158_c0_g1,TRINITY_DN109215_c0_g1,TRINITY_DN110902_c0_g1,TRINITY_DN112001_c0_g1,TRINITY_DN112003_c0_g1,TRINITY_D…
BP	GO:0006082	organic acid metabolic process	190	430	620	2222	3.5e-07	4.53833e-05	TRINITY_DN10019_c0_g1,TRINITY_DN101353_c0_g1,TRINITY_DN10301_c0_g1,TRINITY_DN103968_c0_g1,TRINITY_DN10459_c0_g1,TRINITY_DN104720_c0_g1,TRINITY_DN10508_c0_g1,TRINITY_DN10563_c0_g1,TRINITY_DN10603_c0_g2,TRINITY_DN107962_c0_g1,TRINITY_DN10895_c0_g1,TRINITY_DN109726_c0_g1,TRINITY_DN10978_c0_g2,TRINITY_DN11008_c0_g1,TRINITY_DN11022_c0_g1,TRINITY_DN1104_c0_g4,TRINITY_DN11172_c0_g1,TRINITY_DN11342_c0_g1…	TRINITY_DN10012_c0_g1,TRINITY_DN100406_c0_g1,TRINITY_DN100563_c0_g1,TRINITY_DN100577_c0_g1,TRINITY_DN101361_c0_g1,TRINITY_DN10169_c0_g1,TRINITY_DN10291_c2_g1,TRINITY_DN10291_c2_g3,TRINITY_DN1031_c0_g1,TRINITY_DN103933_c0_g1,TRINITY_DN10425_c1_g1,TRINITY_DN104516_c0_g1,TRINITY_DN104775_c0_g1,TRINITY_DN105499_c0_g1,TRINITY_DN10591_c0_g1,TRINITY_DN105966_c0_g1,TRINITY_DN106121_c0_g1,TRINITY_DN10652_…
BP	GO:0006091	generation of precursor metabolites and energy	79	199	278	908	4.1e-07	5.24351e-05	TRINITY_DN10043_c0_g1,TRINITY_DN101097_c0_g1,TRINITY_DN10618_c0_g1,TRINITY_DN10681_c0_g1,TRINITY_DN10840_c0_g1,TRINITY_DN11080_c1_g1,TRINITY_DN1113_c0_g3,TRINITY_DN112393_c0_g1,TRINITY_DN11424_c0_g1,TRINITY_DN11424_c0_g2,TRINITY_DN11954_c0_g1,TRINITY_DN12003_c0_g1,TRINITY_DN120916_c0_g1,TRINITY_DN121336_c0_g1,TRINITY_DN121857_c0_g1,TRINITY_DN12224_c0_g1,TRINITY_DN12266_c0_g1,TRINITY_DN123184_c0_g…	TRINITY_DN100563_c0_g1,TRINITY_DN100955_c0_g1,TRINITY_DN101674_c0_g1,TRINITY_DN10169_c0_g1,TRINITY_DN103933_c0_g1,TRINITY_DN104775_c0_g1,TRINITY_DN106121_c0_g1,TRINITY_DN10761_c0_g1,TRINITY_DN107707_c0_g1,TRINITY_DN108916_c0_g1,TRINITY_DN111266_c0_g1,TRINITY_DN113810_c0_g1,TRINITY_DN11577_c0_g1,TRINITY_DN116721_c0_g1,TRINITY_DN116881_c0_g1,TRINITY_DN117258_c0_g1,TRINITY_DN11768_c0_g1,TRINITY_DN11…
BP	GO:0043436	oxoacid metabolic process	190	426	616	2209	4.2e-07	5.29881e-05	TRINITY_DN10019_c0_g1,TRINITY_DN101353_c0_g1,TRINITY_DN10301_c0_g1,TRINITY_DN103968_c0_g1,TRINITY_DN10459_c0_g1,TRINITY_DN104720_c0_g1,TRINITY_DN10508_c0_g1,TRINITY_DN10563_c0_g1,TRINITY_DN10603_c0_g2,TRINITY_DN107962_c0_g1,TRINITY_DN10895_c0_g1,TRINITY_DN109726_c0_g1,TRINITY_DN10978_c0_g2,TRINITY_DN11008_c0_g1,TRINITY_DN11022_c0_g1,TRINITY_DN1104_c0_g4,TRINITY_DN11172_c0_g1,TRINITY_DN11342_c0_g1…	TRINITY_DN10012_c0_g1,TRINITY_DN100406_c0_g1,TRINITY_DN100563_c0_g1,TRINITY_DN100577_c0_g1,TRINITY_DN101361_c0_g1,TRINITY_DN10169_c0_g1,TRINITY_DN10291_c2_g1,TRINITY_DN10291_c2_g3,TRINITY_DN1031_c0_g1,TRINITY_DN103933_c0_g1,TRINITY_DN10425_c1_g1,TRINITY_DN104516_c0_g1,TRINITY_DN104775_c0_g1,TRINITY_DN105499_c0_g1,TRINITY_DN10591_c0_g1,TRINITY_DN105966_c0_g1,TRINITY_DN106121_c0_g1,TRINITY_DN10652_…
BP	GO:0006811	ion transport	135	309	444	1540	4.5e-07	5.6016e-05	TRINITY_DN103517_c0_g1,TRINITY_DN10534_c0_g1,TRINITY_DN10775_c0_g1,TRINITY_DN107776_c0_g1,TRINITY_DN108576_c0_g1,TRINITY_DN10895_c0_g1,TRINITY_DN10918_c0_g1,TRINITY_DN11059_c0_g1,TRINITY_DN112480_c0_g1,TRINITY_DN11262_c0_g1,TRINITY_DN11284_c0_g1,TRINITY_DN11284_c0_g2,TRINITY_DN11382_c0_g1,TRINITY_DN11387_c0_g1,TRINITY_DN11519_c0_g1,TRINITY_DN116356_c0_g1,TRINITY_DN11693_c0_g2,TRINITY_DN11704_c0_g…	TRINITY_DN100493_c0_g1,TRINITY_DN101214_c0_g1,TRINITY_DN101674_c0_g1,TRINITY_DN10229_c0_g1,TRINITY_DN10368_c0_g1,TRINITY_DN1038_c0_g1,TRINITY_DN103925_c0_g1,TRINITY_DN104516_c0_g1,TRINITY_DN104775_c0_g1,TRINITY_DN104909_c0_g1,TRINITY_DN10521_c0_g1,TRINITY_DN107701_c0_g1,TRINITY_DN10802_c0_g1,TRINITY_DN108718_c0_g1,TRINITY_DN11072_c0_g1,TRINITY_DN11097_c0_g1,TRINITY_DN113365_c0_g1,TRINITY_DN113408…
BP	GO:0009768	photosynthesis, light harvesting in photosystem I	15	2	17	23	4.7e-07	5.77358e-05	TRINITY_DN10618_c0_g1,TRINITY_DN10840_c0_g1,TRINITY_DN11954_c0_g1,TRINITY_DN14201_c0_g1,TRINITY_DN19123_c0_g1,TRINITY_DN4017_c0_g1,TRINITY_DN4017_c0_g2,TRINITY_DN4041_c0_g1,TRINITY_DN4441_c0_g1,TRINITY_DN6261_c0_g1,TRINITY_DN63963_c0_g1,TRINITY_DN6619_c0_g1,TRINITY_DN7923_c0_g1,TRINITY_DN8770_c0_g1,TRINITY_DN8854_c0_g1	TRINITY_DN19489_c0_g2,TRINITY_DN25896_c0_g1
CC	GO:0010287	plastoglobule	35	7	42	88	5e-07	5.99348e-05	TRINITY_DN10361_c0_g1,TRINITY_DN10618_c0_g1,TRINITY_DN10840_c0_g1,TRINITY_DN112015_c0_g1,TRINITY_DN11424_c0_g1,TRINITY_DN11424_c0_g2,TRINITY_DN11954_c0_g1,TRINITY_DN121857_c0_g1,TRINITY_DN14201_c0_g1,TRINITY_DN17618_c0_g1,TRINITY_DN17905_c0_g1,TRINITY_DN18838_c0_g4,TRINITY_DN19123_c0_g1,TRINITY_DN19959_c0_g1,TRINITY_DN2459_c0_g1,TRINITY_DN2651_c0_g1,TRINITY_DN3900_c0_g2,TRINITY_DN4017_c0_g1,TRINI…	TRINITY_DN17905_c0_g2,TRINITY_DN19489_c0_g2,TRINITY_DN19947_c0_g2,TRINITY_DN25533_c0_g1,TRINITY_DN25896_c0_g1,TRINITY_DN34390_c0_g1,TRINITY_DN8672_c0_g1
BP	GO:0001893	maternal placenta development	0	16	16	21	5.2e-07	5.99348e-05	-	TRINITY_DN103536_c0_g1,TRINITY_DN103565_c0_g1,TRINITY_DN112390_c0_g1,TRINITY_DN116216_c0_g1,TRINITY_DN121696_c0_g1,TRINITY_DN13190_c0_g1,TRINITY_DN13893_c0_g1,TRINITY_DN17348_c0_g1,TRINITY_DN17348_c1_g3,TRINITY_DN18669_c0_g1,TRINITY_DN21326_c0_g2,TRINITY_DN25134_c1_g1,TRINITY_DN28856_c1_g1,TRINITY_DN34008_c0_g1,TRINITY_DN37388_c0_g1,TRINITY_DN46970_c0_g1
BP	GO:0060135	maternal process involved in female pregnancy	0	16	16	21	5.2e-07	5.99348e-05	-	TRINITY_DN103536_c0_g1,TRINITY_DN103565_c0_g1,TRINITY_DN112390_c0_g1,TRINITY_DN116216_c0_g1,TRINITY_DN121696_c0_g1,TRINITY_DN13190_c0_g1,TRINITY_DN13893_c0_g1,TRINITY_DN17348_c0_g1,TRINITY_DN17348_c1_g3,TRINITY_DN18669_c0_g1,TRINITY_DN21326_c0_g2,TRINITY_DN25134_c1_g1,TRINITY_DN28856_c1_g1,TRINITY_DN34008_c0_g1,TRINITY_DN37388_c0_g1,TRINITY_DN46970_c0_g1
CC	GO:0009506	plasmodesma	91	415	506	1795	5.2e-07	5.99348e-05	TRINITY_DN10318_c0_g1,TRINITY_DN1044_c0_g1,TRINITY_DN10505_c0_g1,TRINITY_DN10976_c0_g1,TRINITY_DN1108_c0_g1,TRINITY_DN11090_c1_g1,TRINITY_DN11519_c0_g1,TRINITY_DN116445_c0_g1,TRINITY_DN1179_c0_g2,TRINITY_DN11909_c0_g1,TRINITY_DN120433_c0_g1,TRINITY_DN12221_c0_g1,TRINITY_DN12446_c0_g1,TRINITY_DN12664_c0_g1,TRINITY_DN1324_c0_g2,TRINITY_DN13359_c0_g1,TRINITY_DN13391_c0_g1,TRINITY_DN13689_c0_g1,TRINI…	TRINITY_DN100136_c0_g1,TRINITY_DN100489_c0_g1,TRINITY_DN100728_c0_g1,TRINITY_DN100860_c0_g1,TRINITY_DN101175_c0_g1,TRINITY_DN101198_c0_g1,TRINITY_DN10135_c0_g2,TRINITY_DN101503_c0_g1,TRINITY_DN101614_c0_g1,TRINITY_DN102348_c0_g1,TRINITY_DN103539_c0_g1,TRINITY_DN103891_c0_g1,TRINITY_DN103933_c0_g1,TRINITY_DN104587_c0_g1,TRINITY_DN104627_c0_g1,TRINITY_DN104948_c0_g1,TRINITY_DN105594_c0_g1,TRINITY_D…
CC	GO:0055044	symplast	91	415	506	1795	5.2e-07	5.99348e-05	TRINITY_DN10318_c0_g1,TRINITY_DN1044_c0_g1,TRINITY_DN10505_c0_g1,TRINITY_DN10976_c0_g1,TRINITY_DN1108_c0_g1,TRINITY_DN11090_c1_g1,TRINITY_DN11519_c0_g1,TRINITY_DN116445_c0_g1,TRINITY_DN1179_c0_g2,TRINITY_DN11909_c0_g1,TRINITY_DN120433_c0_g1,TRINITY_DN12221_c0_g1,TRINITY_DN12446_c0_g1,TRINITY_DN12664_c0_g1,TRINITY_DN1324_c0_g2,TRINITY_DN13359_c0_g1,TRINITY_DN13391_c0_g1,TRINITY_DN13689_c0_g1,TRINI…	TRINITY_DN100136_c0_g1,TRINITY_DN100489_c0_g1,TRINITY_DN100728_c0_g1,TRINITY_DN100860_c0_g1,TRINITY_DN101175_c0_g1,TRINITY_DN101198_c0_g1,TRINITY_DN10135_c0_g2,TRINITY_DN101503_c0_g1,TRINITY_DN101614_c0_g1,TRINITY_DN102348_c0_g1,TRINITY_DN103539_c0_g1,TRINITY_DN103891_c0_g1,TRINITY_DN103933_c0_g1,TRINITY_DN104587_c0_g1,TRINITY_DN104627_c0_g1,TRINITY_DN104948_c0_g1,TRINITY_DN105594_c0_g1,TRINITY_D…
MF	GO:0005518	collagen binding	0	18	18	25	5.4e-07	6.1481e-05	-	TRINITY_DN103536_c0_g1,TRINITY_DN103565_c0_g1,TRINITY_DN112390_c0_g1,TRINITY_DN116216_c0_g1,TRINITY_DN121696_c0_g1,TRINITY_DN13634_c0_g1,TRINITY_DN13893_c0_g1,TRINITY_DN17348_c0_g1,TRINITY_DN17348_c1_g3,TRINITY_DN18669_c0_g1,TRINITY_DN20643_c0_g1,TRINITY_DN21326_c0_g2,TRINITY_DN25134_c1_g1,TRINITY_DN28856_c1_g1,TRINITY_DN34008_c0_g1,TRINITY_DN37388_c0_g1,TRINITY_DN41239_c1_g3,TRINITY_DN46970_c0_g1
BP	GO:0010200	response to chitin	30	49	79	202	5.5e-07	6.18651e-05	TRINITY_DN10195_c0_g1,TRINITY_DN1026_c0_g1,TRINITY_DN10645_c0_g1,TRINITY_DN108872_c0_g1,TRINITY_DN11083_c0_g1,TRINITY_DN11533_c1_g1,TRINITY_DN116417_c0_g1,TRINITY_DN12046_c0_g1,TRINITY_DN12601_c0_g1,TRINITY_DN13528_c0_g1,TRINITY_DN1439_c0_g1,TRINITY_DN14443_c0_g1,TRINITY_DN16129_c0_g1,TRINITY_DN16129_c0_g2,TRINITY_DN16256_c0_g1,TRINITY_DN17171_c0_g1,TRINITY_DN1742_c0_g1,TRINITY_DN1752_c0_g1,TRINI…	TRINITY_DN100625_c0_g1,TRINITY_DN10159_c0_g1,TRINITY_DN11395_c0_g1,TRINITY_DN115576_c0_g1,TRINITY_DN12046_c0_g2,TRINITY_DN120749_c0_g1,TRINITY_DN12991_c0_g1,TRINITY_DN13390_c0_g1,TRINITY_DN1453_c0_g1,TRINITY_DN14649_c0_g1,TRINITY_DN1469_c0_g1,TRINITY_DN14962_c0_g1,TRINITY_DN1533_c0_g4,TRINITY_DN1533_c0_g6,TRINITY_DN1533_c1_g1,TRINITY_DN167_c1_g3,TRINITY_DN18460_c0_g2,TRINITY_DN1881_c0_g1,TRINITY_…
MF	GO:0031409	pigment binding	15	2	17	23	6.1e-07	6.77971e-05	TRINITY_DN10618_c0_g1,TRINITY_DN10840_c0_g1,TRINITY_DN11954_c0_g1,TRINITY_DN13120_c0_g1,TRINITY_DN14201_c0_g1,TRINITY_DN19123_c0_g1,TRINITY_DN4017_c0_g1,TRINITY_DN4017_c0_g2,TRINITY_DN4041_c0_g1,TRINITY_DN4441_c0_g1,TRINITY_DN6261_c0_g1,TRINITY_DN63963_c0_g1,TRINITY_DN7923_c0_g1,TRINITY_DN8770_c0_g1,TRINITY_DN8854_c0_g1	TRINITY_DN19489_c0_g2,TRINITY_DN25896_c0_g1
MF	GO:0016684	oxidoreductase activity, acting on peroxide as acceptor	29	42	71	174	6.3e-07	6.91962e-05	TRINITY_DN10074_c0_g1,TRINITY_DN104720_c0_g1,TRINITY_DN108313_c0_g1,TRINITY_DN1113_c0_g3,TRINITY_DN11355_c0_g1,TRINITY_DN11519_c0_g1,TRINITY_DN12665_c0_g1,TRINITY_DN12766_c1_g1,TRINITY_DN13359_c0_g1,TRINITY_DN13689_c0_g1,TRINITY_DN15424_c0_g1,TRINITY_DN15640_c0_g1,TRINITY_DN17582_c0_g1,TRINITY_DN19717_c0_g1,TRINITY_DN20174_c0_g1,TRINITY_DN22118_c0_g1,TRINITY_DN22597_c0_g1,TRINITY_DN2401_c0_g2,TRI…	TRINITY_DN1065_c0_g1,TRINITY_DN10831_c0_g1,TRINITY_DN11190_c0_g1,TRINITY_DN1201_c0_g1,TRINITY_DN1201_c0_g3,TRINITY_DN122727_c0_g1,TRINITY_DN12491_c0_g1,TRINITY_DN12766_c0_g1,TRINITY_DN12766_c0_g2,TRINITY_DN13253_c0_g1,TRINITY_DN14280_c0_g1,TRINITY_DN14280_c1_g1,TRINITY_DN16620_c0_g1,TRINITY_DN20098_c0_g1,TRINITY_DN20259_c0_g1,TRINITY_DN20748_c0_g1,TRINITY_DN21933_c0_g2,TRINITY_DN22301_c0_g1,TRINI…
CC	GO:0005615	extracellular space	17	85	102	281	6.6e-07	7.16484e-05	TRINITY_DN105495_c0_g1,TRINITY_DN113401_c0_g1,TRINITY_DN11451_c0_g1,TRINITY_DN11451_c0_g2,TRINITY_DN117376_c0_g1,TRINITY_DN14214_c0_g1,TRINITY_DN14214_c0_g2,TRINITY_DN16071_c0_g1,TRINITY_DN16446_c0_g3,TRINITY_DN20502_c0_g1,TRINITY_DN22513_c0_g1,TRINITY_DN2439_c0_g3,TRINITY_DN66081_c0_g2,TRINITY_DN6756_c0_g1,TRINITY_DN78066_c0_g2,TRINITY_DN79375_c0_g1,TRINITY_DN8300_c0_g1	TRINITY_DN100951_c0_g1,TRINITY_DN103536_c0_g1,TRINITY_DN103565_c0_g1,TRINITY_DN104876_c0_g1,TRINITY_DN112199_c0_g1,TRINITY_DN112390_c0_g1,TRINITY_DN112443_c0_g1,TRINITY_DN112932_c0_g1,TRINITY_DN113152_c0_g1,TRINITY_DN114491_c0_g1,TRINITY_DN116216_c0_g1,TRINITY_DN121696_c0_g1,TRINITY_DN123395_c0_g1,TRINITY_DN13320_c0_g1,TRINITY_DN13823_c0_g1,TRINITY_DN13823_c0_g2,TRINITY_DN13893_c0_g1,TRINITY_DN14…
BP	GO:0001101	response to acid chemical	239	342	581	2080	7.3e-07	7.83366e-05	TRINITY_DN10007_c0_g1,TRINITY_DN10157_c1_g2,TRINITY_DN101651_c0_g1,TRINITY_DN1026_c0_g1,TRINITY_DN10301_c0_g1,TRINITY_DN103968_c0_g1,TRINITY_DN10422_c0_g1,TRINITY_DN10462_c0_g1,TRINITY_DN10603_c0_g2,TRINITY_DN10681_c0_g1,TRINITY_DN10781_c0_g1,TRINITY_DN10917_c0_g1,TRINITY_DN10918_c0_g1,TRINITY_DN10975_c0_g1,TRINITY_DN10975_c0_g2,TRINITY_DN10979_c0_g1,TRINITY_DN10981_c0_g1,TRINITY_DN11008_c0_g1,TR…	TRINITY_DN100489_c0_g1,TRINITY_DN100633_c0_g1,TRINITY_DN10129_c0_g2,TRINITY_DN10159_c0_g1,TRINITY_DN1031_c0_g1,TRINITY_DN103491_c0_g1,TRINITY_DN103891_c0_g1,TRINITY_DN104775_c0_g1,TRINITY_DN105270_c0_g1,TRINITY_DN10591_c0_g1,TRINITY_DN10596_c0_g1,TRINITY_DN1065_c0_g1,TRINITY_DN107883_c0_g1,TRINITY_DN107924_c0_g1,TRINITY_DN107992_c0_g1,TRINITY_DN108044_c0_g1,TRINITY_DN1093_c0_g1,TRINITY_DN10949_c0…
BP	GO:0097237	cellular response to toxic substance	34	71	105	291	9.2e-07	9.76036e-05	TRINITY_DN10074_c0_g1,TRINITY_DN108313_c0_g1,TRINITY_DN11050_c0_g1,TRINITY_DN1113_c0_g3,TRINITY_DN11519_c0_g1,TRINITY_DN12303_c0_g1,TRINITY_DN12665_c0_g1,TRINITY_DN12766_c1_g1,TRINITY_DN13359_c0_g1,TRINITY_DN13689_c0_g1,TRINITY_DN15424_c0_g1,TRINITY_DN15640_c0_g1,TRINITY_DN17582_c0_g1,TRINITY_DN1858_c0_g1,TRINITY_DN19717_c0_g1,TRINITY_DN20174_c0_g1,TRINITY_DN22118_c0_g1,TRINITY_DN22597_c0_g1,TRIN…	TRINITY_DN104775_c0_g1,TRINITY_DN1065_c0_g1,TRINITY_DN10831_c0_g1,TRINITY_DN11190_c0_g1,TRINITY_DN113263_c0_g1,TRINITY_DN11383_c0_g1,TRINITY_DN11712_c0_g1,TRINITY_DN1201_c0_g1,TRINITY_DN1201_c0_g3,TRINITY_DN122727_c0_g1,TRINITY_DN12491_c0_g1,TRINITY_DN12766_c0_g1,TRINITY_DN12766_c0_g2,TRINITY_DN13144_c0_g2,TRINITY_DN13253_c0_g1,TRINITY_DN13640_c0_g1,TRINITY_DN14280_c0_g1,TRINITY_DN14280_c1_g1,TRI…
BP	GO:0051707	response to other organism	179	365	544	1940	1e-06	0.000103733	TRINITY_DN10019_c0_g1,TRINITY_DN10082_c0_g1,TRINITY_DN100869_c0_g1,TRINITY_DN100945_c0_g1,TRINITY_DN1026_c0_g1,TRINITY_DN103505_c0_g1,TRINITY_DN103968_c0_g1,TRINITY_DN10700_c0_g2,TRINITY_DN108313_c0_g1,TRINITY_DN10895_c0_g1,TRINITY_DN109104_c0_g1,TRINITY_DN10918_c0_g1,TRINITY_DN10975_c0_g1,TRINITY_DN10975_c0_g2,TRINITY_DN10976_c0_g1,TRINITY_DN11008_c0_g1,TRINITY_DN11022_c0_g1,TRINITY_DN11050_c0_g…	TRINITY_DN100389_c0_g1,TRINITY_DN100951_c0_g1,TRINITY_DN101198_c0_g1,TRINITY_DN10159_c0_g1,TRINITY_DN101686_c0_g1,TRINITY_DN10217_c0_g1,TRINITY_DN10229_c0_g1,TRINITY_DN102_c0_g4,TRINITY_DN102_c1_g1,TRINITY_DN103491_c0_g1,TRINITY_DN103925_c0_g1,TRINITY_DN104264_c0_g1,TRINITY_DN10460_c0_g1,TRINITY_DN104948_c0_g1,TRINITY_DN105270_c0_g1,TRINITY_DN107883_c0_g1,TRINITY_DN10922_c0_g1,TRINITY_DN109375_c0…
CC	GO:0005774	vacuolar membrane	57	314	371	1279	1e-06	0.000103733	TRINITY_DN101651_c0_g1,TRINITY_DN10179_c0_g1,TRINITY_DN10534_c0_g1,TRINITY_DN108313_c0_g1,TRINITY_DN11284_c0_g1,TRINITY_DN11382_c0_g1,TRINITY_DN11407_c0_g1,TRINITY_DN11519_c0_g1,TRINITY_DN116785_c0_g1,TRINITY_DN11938_c0_g1,TRINITY_DN12200_c0_g2,TRINITY_DN12357_c0_g1,TRINITY_DN12665_c0_g1,TRINITY_DN130_c0_g2,TRINITY_DN1373_c0_g1,TRINITY_DN13837_c0_g1,TRINITY_DN14540_c0_g1,TRINITY_DN14577_c0_g1,TRI…	TRINITY_DN100384_c0_g1,TRINITY_DN100489_c0_g1,TRINITY_DN100700_c0_g1,TRINITY_DN100860_c0_g1,TRINITY_DN100955_c0_g1,TRINITY_DN100983_c0_g1,TRINITY_DN101081_c0_g1,TRINITY_DN101214_c0_g1,TRINITY_DN101614_c0_g1,TRINITY_DN101686_c0_g1,TRINITY_DN1031_c0_g1,TRINITY_DN103891_c0_g1,TRINITY_DN103933_c0_g1,TRINITY_DN104072_c0_g1,TRINITY_DN104203_c0_g1,TRINITY_DN104909_c0_g1,TRINITY_DN104948_c0_g1,TRINITY_DN…
BP	GO:0009409	response to cold	85	130	215	684	1.1e-06	0.000111626	TRINITY_DN10422_c0_g1,TRINITY_DN10618_c0_g1,TRINITY_DN11080_c1_g1,TRINITY_DN113292_c0_g1,TRINITY_DN11355_c0_g1,TRINITY_DN11509_c0_g1,TRINITY_DN11519_c0_g1,TRINITY_DN11643_c0_g1,TRINITY_DN11643_c0_g2,TRINITY_DN117158_c0_g1,TRINITY_DN11954_c0_g1,TRINITY_DN12601_c0_g1,TRINITY_DN12731_c0_g1,TRINITY_DN13789_c0_g1,TRINITY_DN13826_c0_g1,TRINITY_DN1409_c0_g1,TRINITY_DN14210_c0_g1,TRINITY_DN1470_c0_g2,TRI…	TRINITY_DN100489_c0_g1,TRINITY_DN100625_c0_g1,TRINITY_DN100648_c0_g1,TRINITY_DN10158_c0_g1,TRINITY_DN10380_c0_g1,TRINITY_DN103891_c0_g1,TRINITY_DN104775_c0_g1,TRINITY_DN107924_c0_g1,TRINITY_DN10831_c0_g1,TRINITY_DN109069_c0_g1,TRINITY_DN10949_c0_g1,TRINITY_DN11190_c0_g1,TRINITY_DN112120_c0_g1,TRINITY_DN112378_c0_g1,TRINITY_DN112600_c0_g1,TRINITY_DN112911_c0_g1,TRINITY_DN11356_c0_g1,TRINITY_DN1137…
BP	GO:0098754	detoxification	41	66	107	299	1.1e-06	0.000111626	TRINITY_DN10074_c0_g1,TRINITY_DN108313_c0_g1,TRINITY_DN1113_c0_g3,TRINITY_DN11519_c0_g1,TRINITY_DN12665_c0_g1,TRINITY_DN12766_c1_g1,TRINITY_DN13359_c0_g1,TRINITY_DN13689_c0_g1,TRINITY_DN15424_c0_g1,TRINITY_DN15640_c0_g1,TRINITY_DN17582_c0_g1,TRINITY_DN19717_c0_g1,TRINITY_DN20174_c0_g1,TRINITY_DN22118_c0_g1,TRINITY_DN22597_c0_g1,TRINITY_DN2401_c0_g2,TRINITY_DN2401_c0_g3,TRINITY_DN2983_c0_g1,TRINIT…	TRINITY_DN1065_c0_g1,TRINITY_DN10831_c0_g1,TRINITY_DN11190_c0_g1,TRINITY_DN111954_c0_g1,TRINITY_DN1201_c0_g1,TRINITY_DN1201_c0_g3,TRINITY_DN122727_c0_g1,TRINITY_DN12491_c0_g1,TRINITY_DN12766_c0_g1,TRINITY_DN12766_c0_g2,TRINITY_DN13144_c0_g2,TRINITY_DN13253_c0_g1,TRINITY_DN14280_c0_g1,TRINITY_DN14280_c1_g1,TRINITY_DN15624_c0_g1,TRINITY_DN16620_c0_g1,TRINITY_DN17694_c0_g1,TRINITY_DN20098_c0_g1,TRIN…
MF	GO:0022857	transmembrane transporter activity	143	330	473	1638	1.2e-06	0.000120465	TRINITY_DN10248_c0_g3,TRINITY_DN10248_c0_g4,TRINITY_DN10318_c0_g1,TRINITY_DN103517_c0_g1,TRINITY_DN10775_c0_g1,TRINITY_DN107776_c0_g1,TRINITY_DN10895_c0_g1,TRINITY_DN10917_c0_g1,TRINITY_DN10918_c0_g1,TRINITY_DN10988_c0_g1,TRINITY_DN109967_c0_g1,TRINITY_DN11059_c0_g1,TRINITY_DN112480_c0_g1,TRINITY_DN11262_c0_g1,TRINITY_DN11284_c0_g1,TRINITY_DN11284_c0_g2,TRINITY_DN11382_c0_g1,TRINITY_DN11387_c0_g1…	TRINITY_DN100493_c0_g1,TRINITY_DN101214_c0_g1,TRINITY_DN101674_c0_g1,TRINITY_DN10233_c0_g1,TRINITY_DN10368_c0_g1,TRINITY_DN1038_c0_g1,TRINITY_DN104516_c0_g1,TRINITY_DN104909_c0_g1,TRINITY_DN107701_c0_g1,TRINITY_DN108718_c0_g1,TRINITY_DN109375_c0_g1,TRINITY_DN11072_c0_g1,TRINITY_DN11100_c0_g1,TRINITY_DN111970_c0_g1,TRINITY_DN11278_c0_g1,TRINITY_DN113365_c0_g1,TRINITY_DN113408_c0_g1,TRINITY_DN11340…
CC	GO:0005911	cell-cell junction	91	421	512	1831	1.3e-06	0.000127756	TRINITY_DN10318_c0_g1,TRINITY_DN1044_c0_g1,TRINITY_DN10505_c0_g1,TRINITY_DN10976_c0_g1,TRINITY_DN1108_c0_g1,TRINITY_DN11090_c1_g1,TRINITY_DN11519_c0_g1,TRINITY_DN116445_c0_g1,TRINITY_DN1179_c0_g2,TRINITY_DN11909_c0_g1,TRINITY_DN120433_c0_g1,TRINITY_DN12221_c0_g1,TRINITY_DN12446_c0_g1,TRINITY_DN12664_c0_g1,TRINITY_DN1324_c0_g2,TRINITY_DN13359_c0_g1,TRINITY_DN13391_c0_g1,TRINITY_DN13689_c0_g1,TRINI…	TRINITY_DN100136_c0_g1,TRINITY_DN100489_c0_g1,TRINITY_DN100728_c0_g1,TRINITY_DN100860_c0_g1,TRINITY_DN101175_c0_g1,TRINITY_DN101198_c0_g1,TRINITY_DN10135_c0_g2,TRINITY_DN101503_c0_g1,TRINITY_DN101614_c0_g1,TRINITY_DN102348_c0_g1,TRINITY_DN103539_c0_g1,TRINITY_DN103891_c0_g1,TRINITY_DN103933_c0_g1,TRINITY_DN104587_c0_g1,TRINITY_DN104627_c0_g1,TRINITY_DN104948_c0_g1,TRINITY_DN105594_c0_g1,TRINITY_D…
CC	GO:0070161	anchoring junction	91	421	512	1831	1.3e-06	0.000127756	TRINITY_DN10318_c0_g1,TRINITY_DN1044_c0_g1,TRINITY_DN10505_c0_g1,TRINITY_DN10976_c0_g1,TRINITY_DN1108_c0_g1,TRINITY_DN11090_c1_g1,TRINITY_DN11519_c0_g1,TRINITY_DN116445_c0_g1,TRINITY_DN1179_c0_g2,TRINITY_DN11909_c0_g1,TRINITY_DN120433_c0_g1,TRINITY_DN12221_c0_g1,TRINITY_DN12446_c0_g1,TRINITY_DN12664_c0_g1,TRINITY_DN1324_c0_g2,TRINITY_DN13359_c0_g1,TRINITY_DN13391_c0_g1,TRINITY_DN13689_c0_g1,TRINI…	TRINITY_DN100136_c0_g1,TRINITY_DN100489_c0_g1,TRINITY_DN100728_c0_g1,TRINITY_DN100860_c0_g1,TRINITY_DN101175_c0_g1,TRINITY_DN101198_c0_g1,TRINITY_DN10135_c0_g2,TRINITY_DN101503_c0_g1,TRINITY_DN101614_c0_g1,TRINITY_DN102348_c0_g1,TRINITY_DN103539_c0_g1,TRINITY_DN103891_c0_g1,TRINITY_DN103933_c0_g1,TRINITY_DN104587_c0_g1,TRINITY_DN104627_c0_g1,TRINITY_DN104948_c0_g1,TRINITY_DN105594_c0_g1,TRINITY_D…
BP	GO:0043207	response to external biotic stimulus	179	365	544	1945	1.4e-06	0.00013615	TRINITY_DN10019_c0_g1,TRINITY_DN10082_c0_g1,TRINITY_DN100869_c0_g1,TRINITY_DN100945_c0_g1,TRINITY_DN1026_c0_g1,TRINITY_DN103505_c0_g1,TRINITY_DN103968_c0_g1,TRINITY_DN10700_c0_g2,TRINITY_DN108313_c0_g1,TRINITY_DN10895_c0_g1,TRINITY_DN109104_c0_g1,TRINITY_DN10918_c0_g1,TRINITY_DN10975_c0_g1,TRINITY_DN10975_c0_g2,TRINITY_DN10976_c0_g1,TRINITY_DN11008_c0_g1,TRINITY_DN11022_c0_g1,TRINITY_DN11050_c0_g…	TRINITY_DN100389_c0_g1,TRINITY_DN100951_c0_g1,TRINITY_DN101198_c0_g1,TRINITY_DN10159_c0_g1,TRINITY_DN101686_c0_g1,TRINITY_DN10217_c0_g1,TRINITY_DN10229_c0_g1,TRINITY_DN102_c0_g4,TRINITY_DN102_c1_g1,TRINITY_DN103491_c0_g1,TRINITY_DN103925_c0_g1,TRINITY_DN104264_c0_g1,TRINITY_DN10460_c0_g1,TRINITY_DN104948_c0_g1,TRINITY_DN105270_c0_g1,TRINITY_DN107883_c0_g1,TRINITY_DN10922_c0_g1,TRINITY_DN109375_c0…
BP	GO:0009605	response to external stimulus	258	479	737	2711	1.7e-06	0.000160315	TRINITY_DN10019_c0_g1,TRINITY_DN10079_c0_g1,TRINITY_DN10082_c0_g1,TRINITY_DN100869_c0_g1,TRINITY_DN100945_c0_g1,TRINITY_DN1026_c0_g1,TRINITY_DN10301_c0_g1,TRINITY_DN10318_c0_g1,TRINITY_DN103505_c0_g1,TRINITY_DN103968_c0_g1,TRINITY_DN10462_c0_g1,TRINITY_DN10549_c0_g1,TRINITY_DN10700_c0_g2,TRINITY_DN108313_c0_g1,TRINITY_DN10895_c0_g1,TRINITY_DN109104_c0_g1,TRINITY_DN10918_c0_g1,TRINITY_DN10975_c0_g…	TRINITY_DN100356_c0_g1,TRINITY_DN100389_c0_g1,TRINITY_DN100951_c0_g1,TRINITY_DN101081_c0_g1,TRINITY_DN101198_c0_g1,TRINITY_DN10142_c0_g1,TRINITY_DN10159_c0_g1,TRINITY_DN101686_c0_g1,TRINITY_DN10169_c0_g1,TRINITY_DN10203_c0_g1,TRINITY_DN10217_c0_g1,TRINITY_DN10229_c0_g1,TRINITY_DN102_c0_g4,TRINITY_DN102_c1_g1,TRINITY_DN103491_c0_g1,TRINITY_DN1038_c0_g1,TRINITY_DN103925_c0_g1,TRINITY_DN103938_c0_g1…
BP	GO:0046697	decidualization	0	15	15	20	1.7e-06	0.000160315	-	TRINITY_DN103536_c0_g1,TRINITY_DN103565_c0_g1,TRINITY_DN112390_c0_g1,TRINITY_DN116216_c0_g1,TRINITY_DN121696_c0_g1,TRINITY_DN13893_c0_g1,TRINITY_DN17348_c0_g1,TRINITY_DN17348_c1_g3,TRINITY_DN18669_c0_g1,TRINITY_DN21326_c0_g2,TRINITY_DN25134_c1_g1,TRINITY_DN28856_c1_g1,TRINITY_DN34008_c0_g1,TRINITY_DN37388_c0_g1,TRINITY_DN46970_c0_g1
BP	GO:0097067	cellular response to thyroid hormone stimulus	0	15	15	20	1.7e-06	0.000160315	-	TRINITY_DN103536_c0_g1,TRINITY_DN103565_c0_g1,TRINITY_DN112390_c0_g1,TRINITY_DN116216_c0_g1,TRINITY_DN121696_c0_g1,TRINITY_DN13893_c0_g1,TRINITY_DN17348_c0_g1,TRINITY_DN17348_c1_g3,TRINITY_DN18669_c0_g1,TRINITY_DN21326_c0_g2,TRINITY_DN25134_c1_g1,TRINITY_DN28856_c1_g1,TRINITY_DN34008_c0_g1,TRINITY_DN37388_c0_g1,TRINITY_DN46970_c0_g1
CC	GO:0030054	cell junction	95	436	531	1912	1.9e-06	0.000177384	TRINITY_DN10318_c0_g1,TRINITY_DN1044_c0_g1,TRINITY_DN10505_c0_g1,TRINITY_DN10976_c0_g1,TRINITY_DN1108_c0_g1,TRINITY_DN11090_c1_g1,TRINITY_DN11441_c0_g1,TRINITY_DN11519_c0_g1,TRINITY_DN116445_c0_g1,TRINITY_DN1179_c0_g2,TRINITY_DN11909_c0_g1,TRINITY_DN120433_c0_g1,TRINITY_DN12200_c0_g2,TRINITY_DN12221_c0_g1,TRINITY_DN12446_c0_g1,TRINITY_DN12664_c0_g1,TRINITY_DN1324_c0_g2,TRINITY_DN13359_c0_g1,TRINI…	TRINITY_DN100136_c0_g1,TRINITY_DN100489_c0_g1,TRINITY_DN100728_c0_g1,TRINITY_DN100860_c0_g1,TRINITY_DN101175_c0_g1,TRINITY_DN101198_c0_g1,TRINITY_DN10135_c0_g2,TRINITY_DN101503_c0_g1,TRINITY_DN101614_c0_g1,TRINITY_DN102348_c0_g1,TRINITY_DN103539_c0_g1,TRINITY_DN103891_c0_g1,TRINITY_DN103933_c0_g1,TRINITY_DN104587_c0_g1,TRINITY_DN104627_c0_g1,TRINITY_DN104948_c0_g1,TRINITY_DN105594_c0_g1,TRINITY_D…
BP	GO:0006542	glutamine biosynthetic process	1	20	21	34	2.2e-06	0.000203358	TRINITY_DN12446_c0_g1	TRINITY_DN10994_c0_g1,TRINITY_DN116615_c0_g1,TRINITY_DN23253_c0_g1,TRINITY_DN26326_c1_g1,TRINITY_DN26330_c0_g1,TRINITY_DN2692_c0_g1,TRINITY_DN30952_c0_g2,TRINITY_DN30952_c0_g4,TRINITY_DN32400_c0_g1,TRINITY_DN36941_c0_g1,TRINITY_DN3970_c0_g1,TRINITY_DN3970_c1_g1,TRINITY_DN3970_c1_g2,TRINITY_DN44628_c0_g1,TRINITY_DN44628_c0_g2,TRINITY_DN44628_c0_g4,TRINITY_DN5406_c0_g1,TRINITY_DN7798_c0_g1,TRINITY_…
MF	GO:0004601	peroxidase activity	26	42	68	170	2.5e-06	0.000228824	TRINITY_DN10074_c0_g1,TRINITY_DN108313_c0_g1,TRINITY_DN1113_c0_g3,TRINITY_DN11519_c0_g1,TRINITY_DN12665_c0_g1,TRINITY_DN12766_c1_g1,TRINITY_DN13359_c0_g1,TRINITY_DN13689_c0_g1,TRINITY_DN15424_c0_g1,TRINITY_DN15640_c0_g1,TRINITY_DN17582_c0_g1,TRINITY_DN19717_c0_g1,TRINITY_DN20174_c0_g1,TRINITY_DN22118_c0_g1,TRINITY_DN22597_c0_g1,TRINITY_DN2401_c0_g2,TRINITY_DN2401_c0_g3,TRINITY_DN3060_c0_g4,TRINIT…	TRINITY_DN1065_c0_g1,TRINITY_DN10831_c0_g1,TRINITY_DN11190_c0_g1,TRINITY_DN1201_c0_g1,TRINITY_DN1201_c0_g3,TRINITY_DN122727_c0_g1,TRINITY_DN12491_c0_g1,TRINITY_DN12766_c0_g1,TRINITY_DN12766_c0_g2,TRINITY_DN13253_c0_g1,TRINITY_DN14280_c0_g1,TRINITY_DN14280_c1_g1,TRINITY_DN16620_c0_g1,TRINITY_DN20098_c0_g1,TRINITY_DN20259_c0_g1,TRINITY_DN20748_c0_g1,TRINITY_DN21933_c0_g2,TRINITY_DN22301_c0_g1,TRINI…
BP	GO:0071369	cellular response to ethylene stimulus	52	72	124	363	2.7e-06	0.00024473	TRINITY_DN10457_c0_g1,TRINITY_DN10645_c0_g1,TRINITY_DN10700_c0_g2,TRINITY_DN10888_c0_g1,TRINITY_DN109726_c0_g1,TRINITY_DN10993_c0_g1,TRINITY_DN11050_c0_g1,TRINITY_DN11083_c0_g1,TRINITY_DN111968_c0_g1,TRINITY_DN113401_c0_g1,TRINITY_DN120471_c0_g1,TRINITY_DN12627_c0_g1,TRINITY_DN13114_c0_g1,TRINITY_DN13916_c0_g1,TRINITY_DN14076_c0_g1,TRINITY_DN15031_c0_g1,TRINITY_DN15219_c0_g2,TRINITY_DN16366_c0_g1…	TRINITY_DN100544_c0_g1,TRINITY_DN10291_c2_g1,TRINITY_DN10291_c2_g3,TRINITY_DN1065_c0_g1,TRINITY_DN11395_c0_g1,TRINITY_DN11525_c0_g1,TRINITY_DN11603_c0_g1,TRINITY_DN12010_c0_g1,TRINITY_DN12020_c0_g1,TRINITY_DN120572_c0_g1,TRINITY_DN12902_c0_g1,TRINITY_DN13811_c0_g1,TRINITY_DN14296_c1_g1,TRINITY_DN17639_c0_g2,TRINITY_DN17639_c0_g3,TRINITY_DN17882_c0_g1,TRINITY_DN178_c0_g1,TRINITY_DN17937_c0_g1,TRIN…
BP	GO:0006820	anion transport	73	122	195	619	3e-06	0.000269308	TRINITY_DN10775_c0_g1,TRINITY_DN107776_c0_g1,TRINITY_DN108576_c0_g1,TRINITY_DN10895_c0_g1,TRINITY_DN11262_c0_g1,TRINITY_DN11284_c0_g1,TRINITY_DN11284_c0_g2,TRINITY_DN11382_c0_g1,TRINITY_DN116356_c0_g1,TRINITY_DN11693_c0_g2,TRINITY_DN11704_c0_g2,TRINITY_DN12584_c0_g1,TRINITY_DN13095_c0_g2,TRINITY_DN13151_c0_g1,TRINITY_DN13229_c0_g1,TRINITY_DN13916_c0_g1,TRINITY_DN14569_c0_g1,TRINITY_DN14581_c0_g1,…	TRINITY_DN100493_c0_g1,TRINITY_DN104516_c0_g1,TRINITY_DN10802_c0_g1,TRINITY_DN108718_c0_g1,TRINITY_DN11790_c0_g1,TRINITY_DN11791_c0_g1,TRINITY_DN120647_c0_g1,TRINITY_DN121060_c0_g1,TRINITY_DN123064_c0_g1,TRINITY_DN12689_c0_g1,TRINITY_DN14156_c0_g1,TRINITY_DN14337_c4_g1,TRINITY_DN14481_c0_g1,TRINITY_DN14689_c0_g1,TRINITY_DN15017_c0_g1,TRINITY_DN1522_c0_g1,TRINITY_DN16032_c0_g1,TRINITY_DN16388_c1_g…
BP	GO:0055085	transmembrane transport	167	356	523	1874	3.1e-06	0.000275634	TRINITY_DN10248_c0_g3,TRINITY_DN10248_c0_g4,TRINITY_DN10318_c0_g1,TRINITY_DN103517_c0_g1,TRINITY_DN10775_c0_g1,TRINITY_DN107776_c0_g1,TRINITY_DN10895_c0_g1,TRINITY_DN10917_c0_g1,TRINITY_DN10918_c0_g1,TRINITY_DN10988_c0_g1,TRINITY_DN109967_c0_g1,TRINITY_DN11059_c0_g1,TRINITY_DN112480_c0_g1,TRINITY_DN11262_c0_g1,TRINITY_DN11284_c0_g1,TRINITY_DN11284_c0_g2,TRINITY_DN11382_c0_g1,TRINITY_DN11387_c0_g1…	TRINITY_DN100493_c0_g1,TRINITY_DN101214_c0_g1,TRINITY_DN101674_c0_g1,TRINITY_DN10233_c0_g1,TRINITY_DN10368_c0_g1,TRINITY_DN1038_c0_g1,TRINITY_DN103925_c0_g1,TRINITY_DN104516_c0_g1,TRINITY_DN104775_c0_g1,TRINITY_DN104909_c0_g1,TRINITY_DN107701_c0_g1,TRINITY_DN108337_c0_g1,TRINITY_DN108718_c0_g1,TRINITY_DN109375_c0_g1,TRINITY_DN11072_c0_g1,TRINITY_DN11100_c0_g1,TRINITY_DN111970_c0_g1,TRINITY_DN1127…
BP	GO:0019752	carboxylic acid metabolic process	167	405	572	2068	3.3e-06	0.000290649	TRINITY_DN10019_c0_g1,TRINITY_DN101353_c0_g1,TRINITY_DN10301_c0_g1,TRINITY_DN103968_c0_g1,TRINITY_DN104720_c0_g1,TRINITY_DN10508_c0_g1,TRINITY_DN10563_c0_g1,TRINITY_DN10603_c0_g2,TRINITY_DN107962_c0_g1,TRINITY_DN10978_c0_g2,TRINITY_DN11008_c0_g1,TRINITY_DN1104_c0_g4,TRINITY_DN11172_c0_g1,TRINITY_DN11342_c0_g1,TRINITY_DN11355_c0_g1,TRINITY_DN11417_c0_g2,TRINITY_DN11424_c0_g1,TRINITY_DN11424_c0_g2,…	TRINITY_DN10012_c0_g1,TRINITY_DN100406_c0_g1,TRINITY_DN100563_c0_g1,TRINITY_DN100577_c0_g1,TRINITY_DN101361_c0_g1,TRINITY_DN10169_c0_g1,TRINITY_DN10291_c2_g1,TRINITY_DN10291_c2_g3,TRINITY_DN1031_c0_g1,TRINITY_DN103933_c0_g1,TRINITY_DN10425_c1_g1,TRINITY_DN104516_c0_g1,TRINITY_DN104775_c0_g1,TRINITY_DN105499_c0_g1,TRINITY_DN10591_c0_g1,TRINITY_DN105966_c0_g1,TRINITY_DN106121_c0_g1,TRINITY_DN10652_…
CC	GO:0005829	cytosol	186	961	1147	4412	3.4e-06	0.000296658	TRINITY_DN10057_c0_g1,TRINITY_DN10098_c0_g1,TRINITY_DN101097_c0_g1,TRINITY_DN10167_c0_g1,TRINITY_DN10320_c0_g1,TRINITY_DN103505_c0_g1,TRINITY_DN10508_c0_g1,TRINITY_DN10636_c0_g1,TRINITY_DN10681_c0_g1,TRINITY_DN107962_c0_g1,TRINITY_DN11080_c1_g1,TRINITY_DN11095_c0_g1,TRINITY_DN112015_c0_g1,TRINITY_DN113081_c0_g1,TRINITY_DN11424_c0_g2,TRINITY_DN11441_c0_g1,TRINITY_DN11519_c0_g1,TRINITY_DN11558_c0_g…	TRINITY_DN100117_c0_g1,TRINITY_DN100388_c0_g1,TRINITY_DN100406_c0_g1,TRINITY_DN100468_c0_g1,TRINITY_DN100563_c0_g1,TRINITY_DN100577_c0_g1,TRINITY_DN100648_c0_g1,TRINITY_DN100728_c0_g1,TRINITY_DN100860_c0_g1,TRINITY_DN100983_c0_g1,TRINITY_DN101058_c0_g1,TRINITY_DN101175_c0_g1,TRINITY_DN101198_c0_g1,TRINITY_DN10135_c0_g2,TRINITY_DN101503_c0_g1,TRINITY_DN101614_c0_g1,TRINITY_DN101686_c0_g1,TRINITY_D…
BP	GO:0007565	female pregnancy	0	16	16	23	3.8e-06	0.000328489	-	TRINITY_DN103536_c0_g1,TRINITY_DN103565_c0_g1,TRINITY_DN112390_c0_g1,TRINITY_DN116216_c0_g1,TRINITY_DN121696_c0_g1,TRINITY_DN13190_c0_g1,TRINITY_DN13893_c0_g1,TRINITY_DN17348_c0_g1,TRINITY_DN17348_c1_g3,TRINITY_DN18669_c0_g1,TRINITY_DN21326_c0_g2,TRINITY_DN25134_c1_g1,TRINITY_DN28856_c1_g1,TRINITY_DN34008_c0_g1,TRINITY_DN37388_c0_g1,TRINITY_DN46970_c0_g1
MF	GO:0015318	inorganic molecular entity transmembrane transporter activity	89	211	300	998	4.1e-06	0.000351171	TRINITY_DN103517_c0_g1,TRINITY_DN10775_c0_g1,TRINITY_DN107776_c0_g1,TRINITY_DN10895_c0_g1,TRINITY_DN10918_c0_g1,TRINITY_DN11059_c0_g1,TRINITY_DN112480_c0_g1,TRINITY_DN11262_c0_g1,TRINITY_DN11284_c0_g1,TRINITY_DN11284_c0_g2,TRINITY_DN11382_c0_g1,TRINITY_DN11387_c0_g1,TRINITY_DN11693_c0_g2,TRINITY_DN11704_c0_g2,TRINITY_DN1179_c0_g2,TRINITY_DN11988_c0_g1,TRINITY_DN11997_c0_g1,TRINITY_DN120916_c0_g1,…	TRINITY_DN101214_c0_g1,TRINITY_DN101674_c0_g1,TRINITY_DN10368_c0_g1,TRINITY_DN1038_c0_g1,TRINITY_DN104516_c0_g1,TRINITY_DN104909_c0_g1,TRINITY_DN107701_c0_g1,TRINITY_DN108718_c0_g1,TRINITY_DN11072_c0_g1,TRINITY_DN113365_c0_g1,TRINITY_DN113408_c0_g1,TRINITY_DN11499_c0_g1,TRINITY_DN11556_c0_g1,TRINITY_DN116465_c0_g1,TRINITY_DN1169_c0_g1,TRINITY_DN1169_c0_g2,TRINITY_DN117598_c0_g1,TRINITY_DN117742_c…
BP	GO:0097066	response to thyroid hormone	0	15	15	21	4.6e-06	0.000390415	-	TRINITY_DN103536_c0_g1,TRINITY_DN103565_c0_g1,TRINITY_DN112390_c0_g1,TRINITY_DN116216_c0_g1,TRINITY_DN121696_c0_g1,TRINITY_DN13893_c0_g1,TRINITY_DN17348_c0_g1,TRINITY_DN17348_c1_g3,TRINITY_DN18669_c0_g1,TRINITY_DN21326_c0_g2,TRINITY_DN25134_c1_g1,TRINITY_DN28856_c1_g1,TRINITY_DN34008_c0_g1,TRINITY_DN37388_c0_g1,TRINITY_DN46970_c0_g1
BP	GO:0015698	inorganic anion transport	28	46	74	196	5.7e-06	0.000479416	TRINITY_DN10775_c0_g1,TRINITY_DN108576_c0_g1,TRINITY_DN11262_c0_g1,TRINITY_DN11704_c0_g2,TRINITY_DN13229_c0_g1,TRINITY_DN14920_c0_g1,TRINITY_DN1497_c0_g1,TRINITY_DN16129_c0_g1,TRINITY_DN16129_c0_g2,TRINITY_DN16342_c0_g1,TRINITY_DN16551_c1_g1,TRINITY_DN16702_c0_g1,TRINITY_DN16716_c0_g1,TRINITY_DN16736_c0_g1,TRINITY_DN1695_c1_g2,TRINITY_DN22826_c0_g1,TRINITY_DN26223_c0_g1,TRINITY_DN26823_c0_g1,TRIN…	TRINITY_DN10802_c0_g1,TRINITY_DN108718_c0_g1,TRINITY_DN11790_c0_g1,TRINITY_DN120647_c0_g1,TRINITY_DN12689_c0_g1,TRINITY_DN14481_c0_g1,TRINITY_DN14689_c0_g1,TRINITY_DN16643_c0_g1,TRINITY_DN16898_c0_g1,TRINITY_DN17007_c0_g1,TRINITY_DN17270_c0_g1,TRINITY_DN178_c1_g1,TRINITY_DN1802_c0_g1,TRINITY_DN18075_c0_g1,TRINITY_DN21585_c0_g1,TRINITY_DN21803_c0_g1,TRINITY_DN22046_c0_g2,TRINITY_DN22238_c1_g1,TRIN…
BP	GO:0009617	response to bacterium	78	186	264	883	6.1e-06	0.000508479	TRINITY_DN10019_c0_g1,TRINITY_DN100869_c0_g1,TRINITY_DN1026_c0_g1,TRINITY_DN108313_c0_g1,TRINITY_DN109104_c0_g1,TRINITY_DN11050_c0_g1,TRINITY_DN11090_c1_g1,TRINITY_DN113401_c0_g1,TRINITY_DN116356_c0_g1,TRINITY_DN11643_c0_g1,TRINITY_DN11643_c0_g2,TRINITY_DN11701_c0_g1,TRINITY_DN11938_c0_g1,TRINITY_DN121664_c0_g1,TRINITY_DN12277_c0_g1,TRINITY_DN13095_c0_g2,TRINITY_DN13254_c0_g1,TRINITY_DN13512_c0_g…	TRINITY_DN101198_c0_g1,TRINITY_DN10159_c0_g1,TRINITY_DN10229_c0_g1,TRINITY_DN102_c1_g1,TRINITY_DN10460_c0_g1,TRINITY_DN105270_c0_g1,TRINITY_DN10922_c0_g1,TRINITY_DN109511_c0_g1,TRINITY_DN11402_c0_g1,TRINITY_DN116459_c0_g1,TRINITY_DN116937_c0_g1,TRINITY_DN11707_c0_g1,TRINITY_DN11783_c0_g1,TRINITY_DN120925_c0_g1,TRINITY_DN121680_c0_g1,TRINITY_DN12307_c0_g1,TRINITY_DN12479_c0_g1,TRINITY_DN12490_c0_g…
BP	GO:0062197	cellular response to chemical stress	23	80	103	295	6.3e-06	0.000520503	TRINITY_DN10074_c0_g1,TRINITY_DN10917_c0_g1,TRINITY_DN11050_c0_g1,TRINITY_DN112157_c0_g1,TRINITY_DN13916_c0_g1,TRINITY_DN15097_c0_g1,TRINITY_DN18190_c0_g1,TRINITY_DN1843_c0_g1,TRINITY_DN1858_c0_g1,TRINITY_DN20174_c0_g1,TRINITY_DN2737_c0_g1,TRINITY_DN35814_c0_g2,TRINITY_DN40673_c0_g1,TRINITY_DN5204_c0_g1,TRINITY_DN640_c0_g1,TRINITY_DN6811_c0_g1,TRINITY_DN7165_c0_g1,TRINITY_DN7489_c0_g1,TRINITY_DN7…	TRINITY_DN103491_c0_g1,TRINITY_DN103925_c0_g1,TRINITY_DN104775_c0_g1,TRINITY_DN1065_c0_g1,TRINITY_DN10831_c0_g1,TRINITY_DN113263_c0_g1,TRINITY_DN11383_c0_g1,TRINITY_DN11395_c0_g1,TRINITY_DN11525_c0_g1,TRINITY_DN11712_c0_g1,TRINITY_DN12766_c0_g1,TRINITY_DN12766_c0_g2,TRINITY_DN130_c0_g3,TRINITY_DN13144_c0_g2,TRINITY_DN13640_c0_g1,TRINITY_DN15624_c0_g1,TRINITY_DN15922_c0_g1,TRINITY_DN16388_c1_g1,TR…
CC	GO:0000323	lytic vacuole	14	101	115	340	7.1e-06	0.000581453	TRINITY_DN105495_c0_g1,TRINITY_DN12200_c0_g2,TRINITY_DN123184_c0_g1,TRINITY_DN14214_c0_g1,TRINITY_DN14214_c0_g2,TRINITY_DN1442_c0_g1,TRINITY_DN1481_c0_g1,TRINITY_DN17674_c0_g1,TRINITY_DN66081_c0_g2,TRINITY_DN6756_c0_g1,TRINITY_DN7463_c0_g1,TRINITY_DN750_c0_g2,TRINITY_DN75879_c0_g1,TRINITY_DN7617_c0_g1	TRINITY_DN100919_c0_g1,TRINITY_DN100951_c0_g1,TRINITY_DN100955_c0_g1,TRINITY_DN1031_c0_g1,TRINITY_DN103536_c0_g1,TRINITY_DN103565_c0_g1,TRINITY_DN104775_c0_g1,TRINITY_DN104876_c0_g1,TRINITY_DN104948_c0_g1,TRINITY_DN108206_c0_g1,TRINITY_DN112071_c0_g1,TRINITY_DN112199_c0_g1,TRINITY_DN112390_c0_g1,TRINITY_DN112419_c0_g1,TRINITY_DN112443_c0_g1,TRINITY_DN113152_c0_g1,TRINITY_DN113246_c0_g1,TRINITY_DN…
BP	GO:0044281	small molecule metabolic process	246	621	867	3261	7.6e-06	0.000616988	TRINITY_DN10019_c0_g1,TRINITY_DN101097_c0_g1,TRINITY_DN101353_c0_g1,TRINITY_DN10301_c0_g1,TRINITY_DN103968_c0_g1,TRINITY_DN10459_c0_g1,TRINITY_DN104720_c0_g1,TRINITY_DN10508_c0_g1,TRINITY_DN10563_c0_g1,TRINITY_DN10603_c0_g2,TRINITY_DN107962_c0_g1,TRINITY_DN10866_c0_g1,TRINITY_DN10895_c0_g1,TRINITY_DN109726_c0_g1,TRINITY_DN10978_c0_g2,TRINITY_DN11008_c0_g1,TRINITY_DN11022_c0_g1,TRINITY_DN1104_c0_g…	TRINITY_DN10012_c0_g1,TRINITY_DN100406_c0_g1,TRINITY_DN100563_c0_g1,TRINITY_DN100577_c0_g1,TRINITY_DN101361_c0_g1,TRINITY_DN101674_c0_g1,TRINITY_DN10169_c0_g1,TRINITY_DN10291_c2_g1,TRINITY_DN10291_c2_g3,TRINITY_DN1031_c0_g1,TRINITY_DN103735_c0_g1,TRINITY_DN103933_c0_g1,TRINITY_DN10425_c1_g1,TRINITY_DN104516_c0_g1,TRINITY_DN104775_c0_g1,TRINITY_DN105499_c0_g1,TRINITY_DN10591_c0_g1,TRINITY_DN105966…
BP	GO:0006817	phosphate ion transport	8	19	27	52	8.6e-06	0.000692152	TRINITY_DN108576_c0_g1,TRINITY_DN16129_c0_g1,TRINITY_DN16129_c0_g2,TRINITY_DN16736_c0_g1,TRINITY_DN26823_c0_g1,TRINITY_DN2782_c0_g1,TRINITY_DN4315_c0_g1,TRINITY_DN4746_c0_g1	TRINITY_DN11790_c0_g1,TRINITY_DN1802_c0_g1,TRINITY_DN22527_c0_g1,TRINITY_DN23042_c0_g1,TRINITY_DN23748_c0_g1,TRINITY_DN32335_c0_g1,TRINITY_DN3566_c0_g1,TRINITY_DN41547_c0_g2,TRINITY_DN44249_c0_g1,TRINITY_DN4615_c0_g1,TRINITY_DN5355_c0_g1,TRINITY_DN6731_c0_g1,TRINITY_DN749_c0_g1,TRINITY_DN7772_c0_g1,TRINITY_DN8532_c0_g1,TRINITY_DN8694_c1_g1,TRINITY_DN8960_c0_g1,TRINITY_DN9025_c0_g1,TRINITY_DN91367…
MF	GO:0004356	glutamate-ammonia ligase activity	1	22	23	41	1e-05	0.000784538	TRINITY_DN12446_c0_g1	TRINITY_DN10994_c0_g1,TRINITY_DN116615_c0_g1,TRINITY_DN13537_c0_g1,TRINITY_DN13537_c0_g2,TRINITY_DN23253_c0_g1,TRINITY_DN26326_c1_g1,TRINITY_DN26330_c0_g1,TRINITY_DN2692_c0_g1,TRINITY_DN30952_c0_g2,TRINITY_DN30952_c0_g4,TRINITY_DN32400_c0_g1,TRINITY_DN36941_c0_g1,TRINITY_DN3970_c0_g1,TRINITY_DN3970_c1_g1,TRINITY_DN3970_c1_g2,TRINITY_DN44628_c0_g1,TRINITY_DN44628_c0_g2,TRINITY_DN44628_c0_g4,TRINIT…
MF	GO:0016211	ammonia ligase activity	1	22	23	41	1e-05	0.000784538	TRINITY_DN12446_c0_g1	TRINITY_DN10994_c0_g1,TRINITY_DN116615_c0_g1,TRINITY_DN13537_c0_g1,TRINITY_DN13537_c0_g2,TRINITY_DN23253_c0_g1,TRINITY_DN26326_c1_g1,TRINITY_DN26330_c0_g1,TRINITY_DN2692_c0_g1,TRINITY_DN30952_c0_g2,TRINITY_DN30952_c0_g4,TRINITY_DN32400_c0_g1,TRINITY_DN36941_c0_g1,TRINITY_DN3970_c0_g1,TRINITY_DN3970_c1_g1,TRINITY_DN3970_c1_g2,TRINITY_DN44628_c0_g1,TRINITY_DN44628_c0_g2,TRINITY_DN44628_c0_g4,TRINIT…
MF	GO:0016880	acid-ammonia (or amide) ligase activity	1	22	23	41	1e-05	0.000784538	TRINITY_DN12446_c0_g1	TRINITY_DN10994_c0_g1,TRINITY_DN116615_c0_g1,TRINITY_DN13537_c0_g1,TRINITY_DN13537_c0_g2,TRINITY_DN23253_c0_g1,TRINITY_DN26326_c1_g1,TRINITY_DN26330_c0_g1,TRINITY_DN2692_c0_g1,TRINITY_DN30952_c0_g2,TRINITY_DN30952_c0_g4,TRINITY_DN32400_c0_g1,TRINITY_DN36941_c0_g1,TRINITY_DN3970_c0_g1,TRINITY_DN3970_c1_g1,TRINITY_DN3970_c1_g2,TRINITY_DN44628_c0_g1,TRINITY_DN44628_c0_g2,TRINITY_DN44628_c0_g4,TRINIT…
MF	GO:0015075	ion transmembrane transporter activity	91	220	311	1051	1.1e-05	0.000834927	TRINITY_DN103517_c0_g1,TRINITY_DN10775_c0_g1,TRINITY_DN107776_c0_g1,TRINITY_DN10895_c0_g1,TRINITY_DN10918_c0_g1,TRINITY_DN11059_c0_g1,TRINITY_DN112480_c0_g1,TRINITY_DN11262_c0_g1,TRINITY_DN11284_c0_g1,TRINITY_DN11284_c0_g2,TRINITY_DN11382_c0_g1,TRINITY_DN11387_c0_g1,TRINITY_DN11693_c0_g2,TRINITY_DN11704_c0_g2,TRINITY_DN1179_c0_g2,TRINITY_DN11988_c0_g1,TRINITY_DN11997_c0_g1,TRINITY_DN120916_c0_g1,…	TRINITY_DN101214_c0_g1,TRINITY_DN101674_c0_g1,TRINITY_DN10368_c0_g1,TRINITY_DN1038_c0_g1,TRINITY_DN104516_c0_g1,TRINITY_DN104909_c0_g1,TRINITY_DN107701_c0_g1,TRINITY_DN108718_c0_g1,TRINITY_DN11072_c0_g1,TRINITY_DN113365_c0_g1,TRINITY_DN113408_c0_g1,TRINITY_DN11499_c0_g1,TRINITY_DN11556_c0_g1,TRINITY_DN116465_c0_g1,TRINITY_DN1169_c0_g1,TRINITY_DN1169_c0_g2,TRINITY_DN117598_c0_g1,TRINITY_DN117742_c…
BP	GO:0006414	translational elongation	3	61	64	166	1.1e-05	0.000834927	TRINITY_DN10734_c0_g1,TRINITY_DN546_c0_g1,TRINITY_DN879_c2_g1	TRINITY_DN101198_c0_g1,TRINITY_DN10275_c2_g2,TRINITY_DN10773_c0_g1,TRINITY_DN112679_c0_g1,TRINITY_DN112911_c0_g1,TRINITY_DN11392_c0_g1,TRINITY_DN114812_c0_g1,TRINITY_DN114882_c0_g1,TRINITY_DN11523_c0_g1,TRINITY_DN11523_c1_g1,TRINITY_DN119773_c0_g1,TRINITY_DN122144_c0_g1,TRINITY_DN12957_c0_g1,TRINITY_DN13329_c1_g2,TRINITY_DN13774_c1_g1,TRINITY_DN14436_c0_g1,TRINITY_DN14448_c0_g1,TRINITY_DN14627_c0…
BP	GO:0070887	cellular response to chemical stimulus	237	456	693	2570	1.1e-05	0.000834927	TRINITY_DN10007_c0_g1,TRINITY_DN10019_c0_g1,TRINITY_DN10074_c0_g1,TRINITY_DN100869_c0_g1,TRINITY_DN10157_c1_g2,TRINITY_DN10263_c0_g1,TRINITY_DN1026_c0_g1,TRINITY_DN10301_c0_g1,TRINITY_DN10318_c0_g1,TRINITY_DN103505_c0_g1,TRINITY_DN10401_c0_g1,TRINITY_DN10457_c0_g1,TRINITY_DN10462_c0_g1,TRINITY_DN10645_c0_g1,TRINITY_DN10681_c0_g1,TRINITY_DN10700_c0_g2,TRINITY_DN108313_c0_g1,TRINITY_DN10888_c0_g1,T…	TRINITY_DN100544_c0_g1,TRINITY_DN100633_c0_g1,TRINITY_DN100902_c0_g1,TRINITY_DN10159_c0_g1,TRINITY_DN10203_c0_g1,TRINITY_DN102348_c0_g1,TRINITY_DN10291_c2_g1,TRINITY_DN10291_c2_g3,TRINITY_DN1031_c0_g1,TRINITY_DN103491_c0_g1,TRINITY_DN103536_c0_g1,TRINITY_DN103565_c0_g1,TRINITY_DN103925_c0_g1,TRINITY_DN104341_c0_g1,TRINITY_DN104656_c0_g1,TRINITY_DN104775_c0_g1,TRINITY_DN105270_c0_g1,TRINITY_DN1059…
CC	GO:0009523	photosystem II	27	17	44	103	1.1e-05	0.000834927	TRINITY_DN10840_c0_g1,TRINITY_DN121857_c0_g1,TRINITY_DN13120_c0_g1,TRINITY_DN14201_c0_g1,TRINITY_DN15381_c0_g1,TRINITY_DN15654_c0_g1,TRINITY_DN15733_c0_g1,TRINITY_DN17478_c0_g1,TRINITY_DN18258_c0_g2,TRINITY_DN18838_c0_g4,TRINITY_DN19123_c0_g1,TRINITY_DN2651_c0_g1,TRINITY_DN4017_c0_g1,TRINITY_DN4017_c0_g2,TRINITY_DN4041_c0_g1,TRINITY_DN44320_c0_g1,TRINITY_DN4685_c0_g1,TRINITY_DN51549_c0_g2,TRINITY…	TRINITY_DN14608_c0_g2,TRINITY_DN17652_c0_g1,TRINITY_DN17929_c0_g1,TRINITY_DN18141_c0_g1,TRINITY_DN19489_c0_g1,TRINITY_DN19489_c0_g2,TRINITY_DN20274_c0_g1,TRINITY_DN21156_c1_g1,TRINITY_DN25896_c0_g1,TRINITY_DN29460_c0_g1,TRINITY_DN32653_c0_g1,TRINITY_DN5514_c0_g1,TRINITY_DN7129_c0_g1,TRINITY_DN7987_c0_g1,TRINITY_DN8254_c0_g1,TRINITY_DN9726_c0_g1,TRINITY_DN9726_c0_g2
BP	GO:0009084	glutamine family amino acid biosynthetic process	7	38	45	106	1.3e-05	0.000970944	TRINITY_DN10978_c0_g2,TRINITY_DN12446_c0_g1,TRINITY_DN16568_c0_g1,TRINITY_DN18933_c0_g1,TRINITY_DN23377_c0_g1,TRINITY_DN25281_c0_g1,TRINITY_DN27891_c0_g1	TRINITY_DN104516_c0_g1,TRINITY_DN108003_c0_g1,TRINITY_DN10994_c0_g1,TRINITY_DN11038_c0_g1,TRINITY_DN116615_c0_g1,TRINITY_DN20457_c0_g1,TRINITY_DN21699_c0_g1,TRINITY_DN22196_c0_g1,TRINITY_DN22759_c0_g1,TRINITY_DN23007_c0_g1,TRINITY_DN23253_c0_g1,TRINITY_DN23280_c0_g1,TRINITY_DN25167_c0_g1,TRINITY_DN25366_c0_g1,TRINITY_DN26326_c1_g1,TRINITY_DN26330_c0_g1,TRINITY_DN2692_c0_g1,TRINITY_DN30101_c0_g2,T…
BP	GO:0072350	tricarboxylic acid metabolic process	7	50	57	144	1.3e-05	0.000970944	TRINITY_DN12224_c0_g1,TRINITY_DN13600_c0_g1,TRINITY_DN17575_c0_g1,TRINITY_DN480_c0_g2,TRINITY_DN690_c0_g2,TRINITY_DN70490_c0_g1,TRINITY_DN7606_c0_g1	TRINITY_DN10169_c0_g1,TRINITY_DN103933_c0_g1,TRINITY_DN106121_c0_g1,TRINITY_DN111266_c0_g1,TRINITY_DN123668_c0_g1,TRINITY_DN13352_c0_g1,TRINITY_DN13957_c1_g1,TRINITY_DN14287_c0_g1,TRINITY_DN15522_c1_g1,TRINITY_DN16117_c0_g1,TRINITY_DN16835_c0_g1,TRINITY_DN16894_c0_g1,TRINITY_DN17686_c0_g1,TRINITY_DN18044_c0_g1,TRINITY_DN20422_c0_g1,TRINITY_DN20574_c0_g2,TRINITY_DN21263_c0_g1,TRINITY_DN22964_c0_g1…
MF	GO:0043394	proteoglycan binding	0	15	15	22	1.4e-05	0.00102917	-	TRINITY_DN103536_c0_g1,TRINITY_DN103565_c0_g1,TRINITY_DN112390_c0_g1,TRINITY_DN116216_c0_g1,TRINITY_DN121696_c0_g1,TRINITY_DN13893_c0_g1,TRINITY_DN17348_c0_g1,TRINITY_DN17348_c1_g3,TRINITY_DN18669_c0_g1,TRINITY_DN21326_c0_g2,TRINITY_DN25134_c1_g1,TRINITY_DN28856_c1_g1,TRINITY_DN34008_c0_g1,TRINITY_DN37388_c0_g1,TRINITY_DN46970_c0_g1
BP	GO:0009645	response to low light intensity stimulus	12	5	17	27	1.4e-05	0.00102917	TRINITY_DN10618_c0_g1,TRINITY_DN11954_c0_g1,TRINITY_DN19123_c0_g1,TRINITY_DN4441_c0_g1,TRINITY_DN5557_c0_g1,TRINITY_DN6261_c0_g1,TRINITY_DN63963_c0_g1,TRINITY_DN7923_c0_g1,TRINITY_DN8103_c0_g1,TRINITY_DN8205_c0_g1,TRINITY_DN8770_c0_g1,TRINITY_DN9135_c0_g1	TRINITY_DN11302_c0_g2,TRINITY_DN18956_c0_g2,TRINITY_DN25896_c0_g1,TRINITY_DN40424_c0_g1,TRINITY_DN62815_c0_g1
BP	GO:0032870	cellular response to hormone stimulus	175	296	471	1694	1.5e-05	0.00109406	TRINITY_DN10007_c0_g1,TRINITY_DN100869_c0_g1,TRINITY_DN10157_c1_g2,TRINITY_DN1026_c0_g1,TRINITY_DN10301_c0_g1,TRINITY_DN10318_c0_g1,TRINITY_DN103505_c0_g1,TRINITY_DN10401_c0_g1,TRINITY_DN10457_c0_g1,TRINITY_DN10462_c0_g1,TRINITY_DN10645_c0_g1,TRINITY_DN10681_c0_g1,TRINITY_DN10700_c0_g2,TRINITY_DN10888_c0_g1,TRINITY_DN10917_c0_g1,TRINITY_DN109277_c0_g1,TRINITY_DN109726_c0_g1,TRINITY_DN10975_c0_g1,…	TRINITY_DN100544_c0_g1,TRINITY_DN100633_c0_g1,TRINITY_DN10159_c0_g1,TRINITY_DN10203_c0_g1,TRINITY_DN10291_c2_g1,TRINITY_DN10291_c2_g3,TRINITY_DN1031_c0_g1,TRINITY_DN103536_c0_g1,TRINITY_DN103565_c0_g1,TRINITY_DN104341_c0_g1,TRINITY_DN104656_c0_g1,TRINITY_DN104775_c0_g1,TRINITY_DN105270_c0_g1,TRINITY_DN10591_c0_g1,TRINITY_DN1065_c0_g1,TRINITY_DN107689_c0_g1,TRINITY_DN107883_c0_g1,TRINITY_DN108044_…
BP	GO:0019932	second-messenger-mediated signaling	7	40	47	113	1.6e-05	0.00115795	TRINITY_DN12200_c0_g2,TRINITY_DN12484_c0_g1,TRINITY_DN24232_c0_g1,TRINITY_DN33782_c0_g1,TRINITY_DN6430_c0_g1,TRINITY_DN729_c0_g2,TRINITY_DN8237_c0_g1	TRINITY_DN100384_c0_g1,TRINITY_DN104775_c0_g1,TRINITY_DN11027_c0_g1,TRINITY_DN113089_c0_g1,TRINITY_DN11989_c0_g2,TRINITY_DN12066_c0_g1,TRINITY_DN13640_c0_g1,TRINITY_DN14371_c0_g1,TRINITY_DN18138_c0_g1,TRINITY_DN19246_c0_g1,TRINITY_DN20790_c1_g1,TRINITY_DN2119_c0_g2,TRINITY_DN24232_c0_g2,TRINITY_DN26364_c0_g1,TRINITY_DN30433_c0_g4,TRINITY_DN30499_c0_g1,TRINITY_DN32112_c0_g2,TRINITY_DN3625_c0_g1,TR…
BP	GO:0000462	maturation of SSU-rRNA from tricistronic rRNA transcript (SSU-rRNA, 5.8S rRNA, LSU-rRNA)	0	51	51	126	1.8e-05	0.00129268	-	TRINITY_DN100883_c0_g1,TRINITY_DN100983_c0_g1,TRINITY_DN104072_c0_g1,TRINITY_DN108639_c0_g1,TRINITY_DN112562_c0_g1,TRINITY_DN112713_c0_g1,TRINITY_DN113861_c0_g1,TRINITY_DN116340_c0_g1,TRINITY_DN116373_c0_g1,TRINITY_DN116671_c0_g1,TRINITY_DN117275_c0_g1,TRINITY_DN117728_c0_g1,TRINITY_DN120367_c0_g1,TRINITY_DN120391_c0_g1,TRINITY_DN120761_c0_g1,TRINITY_DN13308_c0_g1,TRINITY_DN13308_c1_g2,TRINITY_DN…
MF	GO:0016638	oxidoreductase activity, acting on the CH-NH2 group of donors	12	20	32	67	1.9e-05	0.00135408	TRINITY_DN10978_c0_g2,TRINITY_DN112040_c0_g1,TRINITY_DN120433_c0_g1,TRINITY_DN130_c0_g2,TRINITY_DN13574_c0_g1,TRINITY_DN17899_c0_g1,TRINITY_DN18933_c0_g1,TRINITY_DN23377_c0_g1,TRINITY_DN27891_c0_g1,TRINITY_DN3905_c1_g1,TRINITY_DN5168_c0_g1,TRINITY_DN7310_c2_g3	TRINITY_DN108003_c0_g1,TRINITY_DN110319_c0_g1,TRINITY_DN11038_c0_g1,TRINITY_DN11293_c0_g1,TRINITY_DN15729_c0_g2,TRINITY_DN15922_c0_g1,TRINITY_DN16893_c0_g1,TRINITY_DN21276_c0_g1,TRINITY_DN22759_c0_g1,TRINITY_DN23280_c0_g1,TRINITY_DN25167_c0_g1,TRINITY_DN25366_c0_g1,TRINITY_DN32440_c0_g1,TRINITY_DN3905_c0_g1,TRINITY_DN3905_c0_g2,TRINITY_DN4602_c0_g1,TRINITY_DN612_c0_g1,TRINITY_DN71_c0_g1,TRINITY_D…
MF	GO:0030246	carbohydrate binding	53	92	145	445	2e-05	0.00141455	TRINITY_DN10157_c1_g1,TRINITY_DN10157_c1_g2,TRINITY_DN10292_c0_g1,TRINITY_DN10864_c0_g1,TRINITY_DN11419_c0_g1,TRINITY_DN11533_c1_g1,TRINITY_DN116785_c0_g1,TRINITY_DN11737_c0_g1,TRINITY_DN1174_c2_g1,TRINITY_DN121664_c0_g1,TRINITY_DN12303_c0_g1,TRINITY_DN123184_c0_g1,TRINITY_DN12357_c0_g1,TRINITY_DN13114_c0_g1,TRINITY_DN1324_c0_g2,TRINITY_DN13359_c0_g2,TRINITY_DN13471_c0_g1,TRINITY_DN13576_c0_g1,TR…	TRINITY_DN10761_c0_g1,TRINITY_DN11137_c0_g1,TRINITY_DN11137_c0_g2,TRINITY_DN1114_c0_g2,TRINITY_DN114391_c0_g1,TRINITY_DN11525_c0_g1,TRINITY_DN12307_c0_g1,TRINITY_DN12307_c0_g2,TRINITY_DN12742_c0_g1,TRINITY_DN13358_c1_g1,TRINITY_DN13603_c0_g1,TRINITY_DN13909_c0_g1,TRINITY_DN14238_c0_g1,TRINITY_DN14502_c0_g1,TRINITY_DN14502_c0_g2,TRINITY_DN14502_c1_g1,TRINITY_DN14502_c1_g2,TRINITY_DN15026_c0_g2,TRI…
MF	GO:0019904	protein domain specific binding	31	38	69	183	2.2e-05	0.0015443	TRINITY_DN10361_c0_g1,TRINITY_DN10618_c0_g1,TRINITY_DN10840_c0_g1,TRINITY_DN11954_c0_g1,TRINITY_DN1195_c1_g2,TRINITY_DN12200_c0_g2,TRINITY_DN13120_c0_g1,TRINITY_DN13687_c0_g1,TRINITY_DN14417_c0_g1,TRINITY_DN19123_c0_g1,TRINITY_DN3323_c0_g1,TRINITY_DN3353_c0_g2,TRINITY_DN357_c0_g1,TRINITY_DN3802_c0_g1,TRINITY_DN40055_c0_g1,TRINITY_DN4017_c0_g1,TRINITY_DN4017_c0_g2,TRINITY_DN4041_c0_g1,TRINITY_DN44…	TRINITY_DN100343_c0_g1,TRINITY_DN102_c0_g4,TRINITY_DN104775_c0_g1,TRINITY_DN109788_c0_g1,TRINITY_DN116937_c0_g1,TRINITY_DN12122_c0_g1,TRINITY_DN13640_c0_g1,TRINITY_DN14212_c0_g1,TRINITY_DN15649_c0_g1,TRINITY_DN16081_c0_g1,TRINITY_DN17805_c0_g1,TRINITY_DN18243_c0_g1,TRINITY_DN18243_c0_g2,TRINITY_DN19016_c0_g1,TRINITY_DN20105_c0_g1,TRINITY_DN20105_c1_g1,TRINITY_DN20105_c1_g2,TRINITY_DN20389_c2_g1,T…
BP	GO:0006099	tricarboxylic acid cycle	6	49	55	140	2.3e-05	0.00159058	TRINITY_DN12224_c0_g1,TRINITY_DN13600_c0_g1,TRINITY_DN17575_c0_g1,TRINITY_DN480_c0_g2,TRINITY_DN690_c0_g2,TRINITY_DN7606_c0_g1	TRINITY_DN10169_c0_g1,TRINITY_DN103933_c0_g1,TRINITY_DN106121_c0_g1,TRINITY_DN111266_c0_g1,TRINITY_DN123668_c0_g1,TRINITY_DN13352_c0_g1,TRINITY_DN13957_c1_g1,TRINITY_DN14287_c0_g1,TRINITY_DN15522_c1_g1,TRINITY_DN16117_c0_g1,TRINITY_DN16835_c0_g1,TRINITY_DN16894_c0_g1,TRINITY_DN17686_c0_g1,TRINITY_DN18044_c0_g1,TRINITY_DN20422_c0_g1,TRINITY_DN20574_c0_g2,TRINITY_DN21263_c0_g1,TRINITY_DN22964_c0_g1…
BP	GO:0006101	citrate metabolic process	6	49	55	140	2.3e-05	0.00159058	TRINITY_DN12224_c0_g1,TRINITY_DN13600_c0_g1,TRINITY_DN17575_c0_g1,TRINITY_DN480_c0_g2,TRINITY_DN690_c0_g2,TRINITY_DN7606_c0_g1	TRINITY_DN10169_c0_g1,TRINITY_DN103933_c0_g1,TRINITY_DN106121_c0_g1,TRINITY_DN111266_c0_g1,TRINITY_DN123668_c0_g1,TRINITY_DN13352_c0_g1,TRINITY_DN13957_c1_g1,TRINITY_DN14287_c0_g1,TRINITY_DN15522_c1_g1,TRINITY_DN16117_c0_g1,TRINITY_DN16835_c0_g1,TRINITY_DN16894_c0_g1,TRINITY_DN17686_c0_g1,TRINITY_DN18044_c0_g1,TRINITY_DN20422_c0_g1,TRINITY_DN20574_c0_g2,TRINITY_DN21263_c0_g1,TRINITY_DN22964_c0_g1…
MF	GO:0016709	oxidoreductase activity, acting on paired donors, with incorporation or reduction of molecular oxygen, NAD(P)H as one donor, and incorporation of one atom of oxygen	30	25	55	138	2.4e-05	0.00164753	TRINITY_DN100945_c0_g1,TRINITY_DN108371_c0_g1,TRINITY_DN11022_c0_g1,TRINITY_DN12108_c0_g1,TRINITY_DN14968_c0_g1,TRINITY_DN1568_c0_g2,TRINITY_DN17184_c0_g1,TRINITY_DN17910_c0_g1,TRINITY_DN18384_c0_g2,TRINITY_DN18452_c0_g1,TRINITY_DN205_c0_g1,TRINITY_DN2088_c0_g1,TRINITY_DN22570_c0_g1,TRINITY_DN2402_c3_g1,TRINITY_DN24058_c0_g1,TRINITY_DN25317_c0_g1,TRINITY_DN26362_c0_g1,TRINITY_DN3438_c0_g1,TRINITY…	TRINITY_DN100902_c0_g1,TRINITY_DN10180_c0_g1,TRINITY_DN10437_c0_g1,TRINITY_DN15581_c0_g1,TRINITY_DN16791_c0_g1,TRINITY_DN17768_c0_g1,TRINITY_DN1826_c0_g1,TRINITY_DN2213_c0_g1,TRINITY_DN23554_c0_g2,TRINITY_DN24573_c0_g1,TRINITY_DN2823_c1_g1,TRINITY_DN2938_c0_g1,TRINITY_DN29756_c0_g1,TRINITY_DN3350_c0_g1,TRINITY_DN33979_c0_g1,TRINITY_DN3460_c0_g1,TRINITY_DN4001_c0_g1,TRINITY_DN4089_c0_g1,TRINITY_DN…
BP	GO:0009266	response to temperature stimulus	104	214	318	1106	2.6e-05	0.0017718	TRINITY_DN10022_c0_g1,TRINITY_DN10422_c0_g1,TRINITY_DN10618_c0_g1,TRINITY_DN10681_c0_g1,TRINITY_DN10918_c0_g1,TRINITY_DN11080_c1_g1,TRINITY_DN113292_c0_g1,TRINITY_DN11355_c0_g1,TRINITY_DN11509_c0_g1,TRINITY_DN11519_c0_g1,TRINITY_DN11643_c0_g1,TRINITY_DN11643_c0_g2,TRINITY_DN117158_c0_g1,TRINITY_DN11954_c0_g1,TRINITY_DN12601_c0_g1,TRINITY_DN12731_c0_g1,TRINITY_DN13114_c0_g1,TRINITY_DN13789_c0_g1,T…	TRINITY_DN100489_c0_g1,TRINITY_DN100625_c0_g1,TRINITY_DN100648_c0_g1,TRINITY_DN10158_c0_g1,TRINITY_DN10380_c0_g1,TRINITY_DN103891_c0_g1,TRINITY_DN104264_c0_g1,TRINITY_DN104775_c0_g1,TRINITY_DN107924_c0_g1,TRINITY_DN10831_c0_g1,TRINITY_DN108337_c0_g1,TRINITY_DN108440_c0_g1,TRINITY_DN109069_c0_g1,TRINITY_DN10921_c0_g1,TRINITY_DN10949_c0_g1,TRINITY_DN11190_c0_g1,TRINITY_DN112120_c0_g1,TRINITY_DN1123…
BP	GO:1990748	cellular detoxification	30	58	88	252	2.8e-05	0.00188063	TRINITY_DN10074_c0_g1,TRINITY_DN108313_c0_g1,TRINITY_DN1113_c0_g3,TRINITY_DN11519_c0_g1,TRINITY_DN12665_c0_g1,TRINITY_DN12766_c1_g1,TRINITY_DN13359_c0_g1,TRINITY_DN13689_c0_g1,TRINITY_DN15424_c0_g1,TRINITY_DN15640_c0_g1,TRINITY_DN17582_c0_g1,TRINITY_DN19717_c0_g1,TRINITY_DN20174_c0_g1,TRINITY_DN22118_c0_g1,TRINITY_DN22597_c0_g1,TRINITY_DN2401_c0_g2,TRINITY_DN2401_c0_g3,TRINITY_DN3060_c0_g4,TRINIT…	TRINITY_DN1065_c0_g1,TRINITY_DN10831_c0_g1,TRINITY_DN11190_c0_g1,TRINITY_DN1201_c0_g1,TRINITY_DN1201_c0_g3,TRINITY_DN122727_c0_g1,TRINITY_DN12491_c0_g1,TRINITY_DN12766_c0_g1,TRINITY_DN12766_c0_g2,TRINITY_DN13144_c0_g2,TRINITY_DN13253_c0_g1,TRINITY_DN14280_c0_g1,TRINITY_DN14280_c1_g1,TRINITY_DN15624_c0_g1,TRINITY_DN16620_c0_g1,TRINITY_DN20098_c0_g1,TRINITY_DN20259_c0_g1,TRINITY_DN20530_c0_g1,TRINI…
CC	GO:0009505	plant-type cell wall	51	75	126	389	2.8e-05	0.00188063	TRINITY_DN108313_c0_g1,TRINITY_DN109104_c0_g1,TRINITY_DN1108_c0_g1,TRINITY_DN11533_c1_g1,TRINITY_DN116785_c0_g1,TRINITY_DN11737_c0_g1,TRINITY_DN11938_c0_g1,TRINITY_DN13359_c0_g1,TRINITY_DN13597_c1_g1,TRINITY_DN13689_c0_g1,TRINITY_DN14521_c0_g1,TRINITY_DN1457_c0_g1,TRINITY_DN14702_c0_g1,TRINITY_DN1481_c0_g1,TRINITY_DN15048_c0_g1,TRINITY_DN15424_c0_g1,TRINITY_DN15731_c0_g2,TRINITY_DN1587_c0_g1,TRIN…	TRINITY_DN100951_c0_g1,TRINITY_DN100955_c0_g1,TRINITY_DN105270_c0_g1,TRINITY_DN1108_c0_g2,TRINITY_DN1117_c0_g2,TRINITY_DN11190_c0_g1,TRINITY_DN112199_c0_g1,TRINITY_DN118542_c0_g1,TRINITY_DN1201_c0_g1,TRINITY_DN1201_c0_g3,TRINITY_DN121757_c0_g1,TRINITY_DN12219_c0_g1,TRINITY_DN12490_c0_g1,TRINITY_DN12491_c0_g1,TRINITY_DN13066_c0_g1,TRINITY_DN13248_c0_g1,TRINITY_DN13381_c0_g3,TRINITY_DN13823_c0_g1,T…
MF	GO:0016903	oxidoreductase activity, acting on the aldehyde or oxo group of donors	15	53	68	181	2.9e-05	0.00193389	TRINITY_DN10004_c0_g1,TRINITY_DN10563_c0_g1,TRINITY_DN1094_c0_g1,TRINITY_DN16568_c0_g1,TRINITY_DN25281_c0_g1,TRINITY_DN2541_c0_g1,TRINITY_DN32951_c0_g1,TRINITY_DN357_c0_g1,TRINITY_DN46429_c0_g1,TRINITY_DN480_c0_g2,TRINITY_DN76730_c0_g1,TRINITY_DN9463_c0_g1,TRINITY_DN947_c0_g1,TRINITY_DN9659_c0_g1,TRINITY_DN9808_c0_g1	TRINITY_DN10652_c0_g1,TRINITY_DN107707_c0_g1,TRINITY_DN11057_c0_g1,TRINITY_DN11577_c0_g1,TRINITY_DN11577_c0_g2,TRINITY_DN11577_c0_g3,TRINITY_DN116721_c0_g1,TRINITY_DN118773_c0_g1,TRINITY_DN121186_c0_g1,TRINITY_DN12747_c0_g1,TRINITY_DN13783_c0_g2,TRINITY_DN14635_c0_g3,TRINITY_DN14635_c0_g4,TRINITY_DN15023_c0_g1,TRINITY_DN15426_c0_g1,TRINITY_DN19026_c0_g1,TRINITY_DN20656_c0_g1,TRINITY_DN21181_c0_g1…
MF	GO:0046527	glucosyltransferase activity	48	45	93	266	3.3e-05	0.00218502	TRINITY_DN108374_c0_g1,TRINITY_DN10885_c0_g1,TRINITY_DN1104_c0_g2,TRINITY_DN1104_c0_g3,TRINITY_DN1104_c0_g4,TRINITY_DN11950_c0_g1,TRINITY_DN120385_c0_g1,TRINITY_DN12216_c1_g1,TRINITY_DN12293_c0_g1,TRINITY_DN123184_c0_g1,TRINITY_DN13830_c0_g1,TRINITY_DN13835_c0_g1,TRINITY_DN13860_c0_g1,TRINITY_DN15085_c0_g1,TRINITY_DN15090_c0_g1,TRINITY_DN1587_c0_g1,TRINITY_DN16003_c1_g2,TRINITY_DN16240_c0_g1,TRIN…	TRINITY_DN1104_c0_g1,TRINITY_DN111250_c0_g1,TRINITY_DN111954_c0_g1,TRINITY_DN113091_c0_g1,TRINITY_DN11440_c0_g1,TRINITY_DN11768_c0_g1,TRINITY_DN13082_c0_g1,TRINITY_DN13815_c0_g3,TRINITY_DN15182_c0_g1,TRINITY_DN15923_c0_g1,TRINITY_DN159_c0_g3,TRINITY_DN159_c7_g1,TRINITY_DN16003_c1_g1,TRINITY_DN16240_c0_g2,TRINITY_DN16376_c0_g1,TRINITY_DN16503_c0_g1,TRINITY_DN1732_c0_g1,TRINITY_DN1868_c0_g2,TRINITY…
MF	GO:0005215	transporter activity	154	371	525	1889	3.5e-05	0.00230113	TRINITY_DN10248_c0_g3,TRINITY_DN10248_c0_g4,TRINITY_DN10318_c0_g1,TRINITY_DN103517_c0_g1,TRINITY_DN103627_c0_g1,TRINITY_DN10775_c0_g1,TRINITY_DN107776_c0_g1,TRINITY_DN10895_c0_g1,TRINITY_DN10917_c0_g1,TRINITY_DN10918_c0_g1,TRINITY_DN10988_c0_g1,TRINITY_DN109967_c0_g1,TRINITY_DN11059_c0_g1,TRINITY_DN112480_c0_g1,TRINITY_DN11262_c0_g1,TRINITY_DN11284_c0_g1,TRINITY_DN11284_c0_g2,TRINITY_DN11382_c0_g…	TRINITY_DN100489_c0_g1,TRINITY_DN100493_c0_g1,TRINITY_DN101214_c0_g1,TRINITY_DN101674_c0_g1,TRINITY_DN10233_c0_g1,TRINITY_DN10368_c0_g1,TRINITY_DN103891_c0_g1,TRINITY_DN1038_c0_g1,TRINITY_DN104516_c0_g1,TRINITY_DN104909_c0_g1,TRINITY_DN107701_c0_g1,TRINITY_DN107924_c0_g1,TRINITY_DN108550_c0_g1,TRINITY_DN108718_c0_g1,TRINITY_DN109375_c0_g1,TRINITY_DN11072_c0_g1,TRINITY_DN11100_c0_g1,TRINITY_DN1119…
BP	GO:0009765	photosynthesis, light harvesting	16	8	24	47	3.9e-05	0.00254618	TRINITY_DN10618_c0_g1,TRINITY_DN10840_c0_g1,TRINITY_DN11954_c0_g1,TRINITY_DN14201_c0_g1,TRINITY_DN19123_c0_g1,TRINITY_DN25052_c0_g1,TRINITY_DN4017_c0_g1,TRINITY_DN4017_c0_g2,TRINITY_DN4041_c0_g1,TRINITY_DN4441_c0_g1,TRINITY_DN6261_c0_g1,TRINITY_DN63963_c0_g1,TRINITY_DN6619_c0_g1,TRINITY_DN7923_c0_g1,TRINITY_DN8770_c0_g1,TRINITY_DN8854_c0_g1	TRINITY_DN19489_c0_g1,TRINITY_DN19489_c0_g2,TRINITY_DN20274_c0_g1,TRINITY_DN21156_c1_g1,TRINITY_DN25896_c0_g1,TRINITY_DN27039_c0_g1,TRINITY_DN5514_c0_g1,TRINITY_DN7987_c0_g1
BP	GO:0006790	sulfur compound metabolic process	65	136	201	666	4.2e-05	0.002723	TRINITY_DN10459_c0_g1,TRINITY_DN10508_c0_g1,TRINITY_DN10603_c0_g2,TRINITY_DN109726_c0_g1,TRINITY_DN11008_c0_g1,TRINITY_DN11022_c0_g1,TRINITY_DN11415_c0_g1,TRINITY_DN11617_c0_g1,TRINITY_DN120433_c0_g1,TRINITY_DN1299_c2_g1,TRINITY_DN1299_c2_g2,TRINITY_DN13132_c0_g1,TRINITY_DN13593_c0_g1,TRINITY_DN13708_c1_g1,TRINITY_DN14375_c0_g1,TRINITY_DN1438_c0_g2,TRINITY_DN15031_c0_g1,TRINITY_DN15252_c0_g1,TRIN…	TRINITY_DN100009_c0_g1,TRINITY_DN1031_c0_g1,TRINITY_DN10425_c1_g1,TRINITY_DN10591_c0_g1,TRINITY_DN107707_c0_g1,TRINITY_DN10773_c0_g1,TRINITY_DN108652_c0_g1,TRINITY_DN109551_c0_g1,TRINITY_DN111993_c0_g1,TRINITY_DN112679_c0_g1,TRINITY_DN11293_c0_g1,TRINITY_DN11392_c0_g1,TRINITY_DN1169_c0_g1,TRINITY_DN1169_c0_g2,TRINITY_DN11872_c0_g1,TRINITY_DN11872_c0_g2,TRINITY_DN118738_c0_g1,TRINITY_DN12037_c0_g1…
BP	GO:0071495	cellular response to endogenous stimulus	178	316	494	1803	4.6e-05	0.00294148	TRINITY_DN10007_c0_g1,TRINITY_DN100869_c0_g1,TRINITY_DN10157_c1_g2,TRINITY_DN1026_c0_g1,TRINITY_DN10301_c0_g1,TRINITY_DN10318_c0_g1,TRINITY_DN103505_c0_g1,TRINITY_DN10401_c0_g1,TRINITY_DN10457_c0_g1,TRINITY_DN10462_c0_g1,TRINITY_DN10645_c0_g1,TRINITY_DN10681_c0_g1,TRINITY_DN10700_c0_g2,TRINITY_DN10888_c0_g1,TRINITY_DN10917_c0_g1,TRINITY_DN109277_c0_g1,TRINITY_DN109726_c0_g1,TRINITY_DN10975_c0_g1,…	TRINITY_DN100544_c0_g1,TRINITY_DN100633_c0_g1,TRINITY_DN10159_c0_g1,TRINITY_DN10203_c0_g1,TRINITY_DN102348_c0_g1,TRINITY_DN10291_c2_g1,TRINITY_DN10291_c2_g3,TRINITY_DN1031_c0_g1,TRINITY_DN103536_c0_g1,TRINITY_DN103565_c0_g1,TRINITY_DN104341_c0_g1,TRINITY_DN104656_c0_g1,TRINITY_DN104775_c0_g1,TRINITY_DN105270_c0_g1,TRINITY_DN10591_c0_g1,TRINITY_DN1065_c0_g1,TRINITY_DN107689_c0_g1,TRINITY_DN107883_…
BP	GO:0010114	response to red light	29	12	41	98	4.6e-05	0.00294148	TRINITY_DN10179_c0_g1,TRINITY_DN10462_c0_g1,TRINITY_DN10840_c0_g1,TRINITY_DN12679_c0_g1,TRINITY_DN14201_c0_g1,TRINITY_DN14351_c0_g1,TRINITY_DN19123_c0_g1,TRINITY_DN19183_c0_g1,TRINITY_DN20392_c0_g1,TRINITY_DN205_c0_g1,TRINITY_DN2158_c0_g1,TRINITY_DN24058_c0_g1,TRINITY_DN32632_c0_g1,TRINITY_DN3438_c0_g1,TRINITY_DN4017_c0_g1,TRINITY_DN4017_c0_g2,TRINITY_DN4036_c1_g1,TRINITY_DN4041_c0_g1,TRINITY_DN4…	TRINITY_DN111059_c0_g1,TRINITY_DN11971_c0_g1,TRINITY_DN14092_c1_g1,TRINITY_DN17278_c0_g1,TRINITY_DN19316_c0_g1,TRINITY_DN19996_c0_g3,TRINITY_DN19996_c0_g4,TRINITY_DN25896_c0_g1,TRINITY_DN44726_c0_g1,TRINITY_DN7486_c0_g1,TRINITY_DN75965_c0_g1,TRINITY_DN8207_c0_g1
MF	GO:0016762	xyloglucan:xyloglucosyl transferase activity	13	3	16	26	4.9e-05	0.003112	TRINITY_DN10885_c0_g1,TRINITY_DN1587_c0_g1,TRINITY_DN18145_c0_g1,TRINITY_DN2571_c0_g1,TRINITY_DN4958_c0_g1,TRINITY_DN51767_c0_g1,TRINITY_DN5287_c0_g1,TRINITY_DN5516_c0_g1,TRINITY_DN7307_c1_g1,TRINITY_DN7307_c1_g2,TRINITY_DN8103_c0_g1,TRINITY_DN9135_c0_g1,TRINITY_DN9938_c0_g1	TRINITY_DN11440_c0_g1,TRINITY_DN44302_c0_g1,TRINITY_DN64776_c0_g1
BP	GO:0009723	response to ethylene	67	93	160	515	5e-05	0.00315405	TRINITY_DN10422_c0_g1,TRINITY_DN10457_c0_g1,TRINITY_DN10645_c0_g1,TRINITY_DN10700_c0_g2,TRINITY_DN10888_c0_g1,TRINITY_DN109726_c0_g1,TRINITY_DN10993_c0_g1,TRINITY_DN11050_c0_g1,TRINITY_DN11083_c0_g1,TRINITY_DN111968_c0_g1,TRINITY_DN113401_c0_g1,TRINITY_DN11841_c0_g1,TRINITY_DN120471_c0_g1,TRINITY_DN12627_c0_g1,TRINITY_DN13114_c0_g1,TRINITY_DN13512_c0_g2,TRINITY_DN13916_c0_g1,TRINITY_DN13924_c2_g1…	TRINITY_DN100343_c0_g1,TRINITY_DN100544_c0_g1,TRINITY_DN10291_c2_g1,TRINITY_DN10291_c2_g3,TRINITY_DN1065_c0_g1,TRINITY_DN107883_c0_g1,TRINITY_DN11395_c0_g1,TRINITY_DN11525_c0_g1,TRINITY_DN11603_c0_g1,TRINITY_DN11975_c0_g1,TRINITY_DN12010_c0_g1,TRINITY_DN12020_c0_g1,TRINITY_DN120572_c0_g1,TRINITY_DN12902_c0_g1,TRINITY_DN13512_c0_g1,TRINITY_DN13811_c0_g1,TRINITY_DN14296_c1_g1,TRINITY_DN15922_c0_g1,…
BP	GO:0034220	ion transmembrane transport	99	234	333	1173	5.1e-05	0.00317424	TRINITY_DN103517_c0_g1,TRINITY_DN10775_c0_g1,TRINITY_DN10895_c0_g1,TRINITY_DN10918_c0_g1,TRINITY_DN11059_c0_g1,TRINITY_DN112480_c0_g1,TRINITY_DN11262_c0_g1,TRINITY_DN11284_c0_g1,TRINITY_DN11284_c0_g2,TRINITY_DN11382_c0_g1,TRINITY_DN11387_c0_g1,TRINITY_DN11519_c0_g1,TRINITY_DN116356_c0_g1,TRINITY_DN11693_c0_g2,TRINITY_DN11704_c0_g2,TRINITY_DN1179_c0_g2,TRINITY_DN11988_c0_g1,TRINITY_DN11997_c0_g1,T…	TRINITY_DN101214_c0_g1,TRINITY_DN101674_c0_g1,TRINITY_DN10368_c0_g1,TRINITY_DN1038_c0_g1,TRINITY_DN103925_c0_g1,TRINITY_DN104516_c0_g1,TRINITY_DN104909_c0_g1,TRINITY_DN107701_c0_g1,TRINITY_DN108718_c0_g1,TRINITY_DN11072_c0_g1,TRINITY_DN113365_c0_g1,TRINITY_DN113408_c0_g1,TRINITY_DN11499_c0_g1,TRINITY_DN11556_c0_g1,TRINITY_DN116465_c0_g1,TRINITY_DN1169_c0_g1,TRINITY_DN1169_c0_g2,TRINITY_DN117598_c…
BP	GO:0006073	cellular glucan metabolic process	47	71	118	362	5.1e-05	0.00317424	TRINITY_DN10427_c0_g1,TRINITY_DN10864_c0_g1,TRINITY_DN10885_c0_g1,TRINITY_DN11509_c0_g1,TRINITY_DN11597_c0_g1,TRINITY_DN11701_c0_g1,TRINITY_DN11950_c0_g1,TRINITY_DN12221_c0_g1,TRINITY_DN123184_c0_g1,TRINITY_DN13114_c0_g1,TRINITY_DN1339_c0_g1,TRINITY_DN1339_c0_g2,TRINITY_DN13789_c0_g1,TRINITY_DN1587_c0_g1,TRINITY_DN16748_c0_g1,TRINITY_DN17674_c0_g1,TRINITY_DN17798_c0_g1,TRINITY_DN18145_c0_g1,TRINI…	TRINITY_DN111250_c0_g1,TRINITY_DN11252_c0_g1,TRINITY_DN114391_c0_g1,TRINITY_DN11440_c0_g1,TRINITY_DN116862_c0_g1,TRINITY_DN11768_c0_g1,TRINITY_DN121430_c0_g1,TRINITY_DN13082_c0_g1,TRINITY_DN13853_c0_g2,TRINITY_DN13909_c0_g1,TRINITY_DN14495_c0_g1,TRINITY_DN14923_c0_g1,TRINITY_DN1516_c0_g1,TRINITY_DN15182_c0_g1,TRINITY_DN1553_c0_g1,TRINITY_DN15923_c0_g1,TRINITY_DN159_c0_g3,TRINITY_DN159_c7_g1,TRINI…
BP	GO:0015977	carbon fixation	8	23	31	68	5.4e-05	0.0033387	TRINITY_DN11080_c1_g1,TRINITY_DN112015_c0_g1,TRINITY_DN11701_c0_g1,TRINITY_DN3201_c0_g1,TRINITY_DN357_c0_g1,TRINITY_DN46429_c0_g1,TRINITY_DN9634_c0_g1,TRINITY_DN9659_c0_g1	TRINITY_DN10169_c0_g1,TRINITY_DN10425_c1_g1,TRINITY_DN11250_c0_g1,TRINITY_DN11577_c0_g2,TRINITY_DN11577_c0_g3,TRINITY_DN119668_c0_g1,TRINITY_DN12110_c0_g1,TRINITY_DN15522_c1_g1,TRINITY_DN16077_c0_g1,TRINITY_DN16835_c0_g1,TRINITY_DN17908_c0_g1,TRINITY_DN18738_c0_g1,TRINITY_DN20401_c0_g1,TRINITY_DN21146_c0_g2,TRINITY_DN21146_c1_g1,TRINITY_DN23246_c0_g1,TRINITY_DN23512_c0_g1,TRINITY_DN30078_c0_g1,TR…
MF	GO:0005506	iron ion binding	41	60	101	297	5.6e-05	0.00343958	TRINITY_DN10133_c0_g1,TRINITY_DN10602_c0_g1,TRINITY_DN108371_c0_g1,TRINITY_DN11022_c0_g1,TRINITY_DN11172_c0_g1,TRINITY_DN12108_c0_g1,TRINITY_DN12615_c0_g1,TRINITY_DN13034_c0_g1,TRINITY_DN14968_c0_g1,TRINITY_DN1568_c0_g2,TRINITY_DN15_c0_g1,TRINITY_DN17184_c0_g1,TRINITY_DN17239_c0_g1,TRINITY_DN17910_c0_g1,TRINITY_DN18452_c0_g1,TRINITY_DN205_c0_g1,TRINITY_DN2088_c0_g1,TRINITY_DN22570_c0_g1,TRINITY_D…	TRINITY_DN100009_c0_g1,TRINITY_DN10012_c0_g1,TRINITY_DN100902_c0_g1,TRINITY_DN10180_c0_g1,TRINITY_DN1045_c0_g1,TRINITY_DN10756_c0_g1,TRINITY_DN108550_c0_g1,TRINITY_DN10886_c0_g1,TRINITY_DN120691_c0_g1,TRINITY_DN120740_c0_g1,TRINITY_DN1407_c0_g1,TRINITY_DN14212_c0_g1,TRINITY_DN14635_c0_g3,TRINITY_DN14635_c0_g4,TRINITY_DN15023_c0_g1,TRINITY_DN15426_c0_g1,TRINITY_DN15581_c0_g1,TRINITY_DN15_c0_g2,TRI…
BP	GO:0009414	response to water deprivation	96	95	191	632	5.9e-05	0.00360016	TRINITY_DN10681_c0_g1,TRINITY_DN11008_c0_g1,TRINITY_DN111968_c0_g1,TRINITY_DN11355_c0_g1,TRINITY_DN11519_c0_g1,TRINITY_DN11643_c0_g1,TRINITY_DN11643_c0_g2,TRINITY_DN1179_c0_g2,TRINITY_DN11950_c0_g1,TRINITY_DN12003_c0_g1,TRINITY_DN12030_c0_g1,TRINITY_DN12046_c0_g1,TRINITY_DN12601_c0_g1,TRINITY_DN12731_c0_g1,TRINITY_DN12933_c0_g1,TRINITY_DN13114_c0_g1,TRINITY_DN13132_c0_g1,TRINITY_DN13708_c1_g1,TRI…	TRINITY_DN100489_c0_g1,TRINITY_DN103891_c0_g1,TRINITY_DN107924_c0_g1,TRINITY_DN10949_c0_g1,TRINITY_DN11190_c0_g1,TRINITY_DN11581_c0_g1,TRINITY_DN116937_c0_g1,TRINITY_DN1171_c0_g1,TRINITY_DN12046_c0_g2,TRINITY_DN120572_c0_g1,TRINITY_DN121186_c0_g1,TRINITY_DN12155_c0_g1,TRINITY_DN15479_c0_g3,TRINITY_DN15758_c0_g1,TRINITY_DN15862_c0_g1,TRINITY_DN16003_c1_g1,TRINITY_DN16150_c1_g1,TRINITY_DN16227_c0_g…
BP	GO:0006865	amino acid transport	16	35	51	131	6e-05	0.0036374	TRINITY_DN11284_c0_g1,TRINITY_DN11284_c0_g2,TRINITY_DN11693_c0_g2,TRINITY_DN14569_c0_g1,TRINITY_DN1596_c0_g1,TRINITY_DN16193_c0_g1,TRINITY_DN16193_c1_g1,TRINITY_DN16193_c1_g2,TRINITY_DN16974_c0_g1,TRINITY_DN2112_c0_g1,TRINITY_DN21278_c0_g1,TRINITY_DN28447_c0_g1,TRINITY_DN3110_c0_g1,TRINITY_DN4031_c0_g1,TRINITY_DN97027_c0_g1,TRINITY_DN9881_c1_g1	TRINITY_DN100493_c0_g1,TRINITY_DN104516_c0_g1,TRINITY_DN11791_c0_g1,TRINITY_DN123064_c0_g1,TRINITY_DN16032_c0_g1,TRINITY_DN17400_c0_g1,TRINITY_DN18201_c0_g1,TRINITY_DN18296_c0_g1,TRINITY_DN21419_c0_g1,TRINITY_DN22976_c0_g1,TRINITY_DN23436_c0_g1,TRINITY_DN24110_c0_g1,TRINITY_DN24342_c0_g2,TRINITY_DN24603_c0_g1,TRINITY_DN26003_c0_g1,TRINITY_DN28419_c0_g1,TRINITY_DN32415_c0_g1,TRINITY_DN34012_c0_g1,…
BP	GO:0044042	glucan metabolic process	48	72	120	371	6.5e-05	0.0039151	TRINITY_DN10427_c0_g1,TRINITY_DN10864_c0_g1,TRINITY_DN10885_c0_g1,TRINITY_DN11509_c0_g1,TRINITY_DN11597_c0_g1,TRINITY_DN11701_c0_g1,TRINITY_DN11950_c0_g1,TRINITY_DN12221_c0_g1,TRINITY_DN123184_c0_g1,TRINITY_DN13114_c0_g1,TRINITY_DN1339_c0_g1,TRINITY_DN1339_c0_g2,TRINITY_DN13789_c0_g1,TRINITY_DN1442_c0_g1,TRINITY_DN1587_c0_g1,TRINITY_DN16748_c0_g1,TRINITY_DN17674_c0_g1,TRINITY_DN17798_c0_g1,TRINIT…	TRINITY_DN111250_c0_g1,TRINITY_DN11252_c0_g1,TRINITY_DN114391_c0_g1,TRINITY_DN11440_c0_g1,TRINITY_DN116862_c0_g1,TRINITY_DN11768_c0_g1,TRINITY_DN121430_c0_g1,TRINITY_DN12806_c0_g1,TRINITY_DN13082_c0_g1,TRINITY_DN13853_c0_g2,TRINITY_DN13909_c0_g1,TRINITY_DN14495_c0_g1,TRINITY_DN14923_c0_g1,TRINITY_DN1516_c0_g1,TRINITY_DN15182_c0_g1,TRINITY_DN1553_c0_g1,TRINITY_DN15923_c0_g1,TRINITY_DN159_c0_g3,TRI…
BP	GO:0009415	response to water	100	96	196	652	6.6e-05	0.00394985	TRINITY_DN10603_c0_g2,TRINITY_DN10681_c0_g1,TRINITY_DN11008_c0_g1,TRINITY_DN111968_c0_g1,TRINITY_DN11355_c0_g1,TRINITY_DN11519_c0_g1,TRINITY_DN11643_c0_g1,TRINITY_DN11643_c0_g2,TRINITY_DN1179_c0_g2,TRINITY_DN11950_c0_g1,TRINITY_DN12003_c0_g1,TRINITY_DN12030_c0_g1,TRINITY_DN12046_c0_g1,TRINITY_DN12601_c0_g1,TRINITY_DN12731_c0_g1,TRINITY_DN12933_c0_g1,TRINITY_DN1299_c2_g1,TRINITY_DN1299_c2_g2,TRINI…	TRINITY_DN100489_c0_g1,TRINITY_DN103891_c0_g1,TRINITY_DN107924_c0_g1,TRINITY_DN10949_c0_g1,TRINITY_DN11190_c0_g1,TRINITY_DN11581_c0_g1,TRINITY_DN116937_c0_g1,TRINITY_DN1171_c0_g1,TRINITY_DN12046_c0_g2,TRINITY_DN120572_c0_g1,TRINITY_DN121186_c0_g1,TRINITY_DN12155_c0_g1,TRINITY_DN15479_c0_g3,TRINITY_DN15758_c0_g1,TRINITY_DN15862_c0_g1,TRINITY_DN16003_c1_g1,TRINITY_DN16150_c1_g1,TRINITY_DN16227_c0_g…
BP	GO:0009644	response to high light intensity	23	42	65	178	6.7e-05	0.00395894	TRINITY_DN10618_c0_g1,TRINITY_DN10681_c0_g1,TRINITY_DN11954_c0_g1,TRINITY_DN12003_c0_g1,TRINITY_DN15097_c0_g1,TRINITY_DN15966_c0_g1,TRINITY_DN16609_c0_g1,TRINITY_DN19123_c0_g1,TRINITY_DN19975_c0_g1,TRINITY_DN2651_c0_g1,TRINITY_DN29861_c0_g1,TRINITY_DN3666_c0_g1,TRINITY_DN4441_c0_g1,TRINITY_DN506_c0_g3,TRINITY_DN5181_c0_g1,TRINITY_DN56287_c0_g2,TRINITY_DN6261_c0_g1,TRINITY_DN63963_c0_g1,TRINITY_DN…	TRINITY_DN100489_c0_g1,TRINITY_DN100955_c0_g1,TRINITY_DN103891_c0_g1,TRINITY_DN107924_c0_g1,TRINITY_DN108440_c0_g1,TRINITY_DN109069_c0_g1,TRINITY_DN10921_c0_g1,TRINITY_DN114211_c0_g1,TRINITY_DN11581_c0_g1,TRINITY_DN11623_c1_g1,TRINITY_DN12046_c0_g2,TRINITY_DN120925_c0_g1,TRINITY_DN12219_c0_g1,TRINITY_DN13381_c0_g3,TRINITY_DN15421_c0_g4,TRINITY_DN15828_c0_g3,TRINITY_DN16371_c0_g1,TRINITY_DN17107_c…
BP	GO:0006883	cellular sodium ion homeostasis	0	8	8	9	6.7e-05	0.00395894	-	TRINITY_DN100489_c0_g1,TRINITY_DN103891_c0_g1,TRINITY_DN107924_c0_g1,TRINITY_DN15272_c0_g1,TRINITY_DN17815_c0_g1,TRINITY_DN36426_c0_g1,TRINITY_DN37777_c0_g1,TRINITY_DN37777_c0_g2
BP	GO:0017001	antibiotic catabolic process	24	25	49	125	6.8e-05	0.00399275	TRINITY_DN10074_c0_g1,TRINITY_DN108313_c0_g1,TRINITY_DN12665_c0_g1,TRINITY_DN13359_c0_g1,TRINITY_DN13689_c0_g1,TRINITY_DN15424_c0_g1,TRINITY_DN15640_c0_g1,TRINITY_DN17582_c0_g1,TRINITY_DN19717_c0_g1,TRINITY_DN20174_c0_g1,TRINITY_DN22118_c0_g1,TRINITY_DN2401_c0_g2,TRINITY_DN2401_c0_g3,TRINITY_DN3060_c0_g4,TRINITY_DN4288_c0_g2,TRINITY_DN4603_c0_g1,TRINITY_DN6633_c0_g3,TRINITY_DN6978_c0_g1,TRINITY_D…	TRINITY_DN10831_c0_g1,TRINITY_DN11190_c0_g1,TRINITY_DN1201_c0_g1,TRINITY_DN1201_c0_g3,TRINITY_DN12491_c0_g1,TRINITY_DN14280_c0_g1,TRINITY_DN14280_c1_g1,TRINITY_DN20098_c0_g1,TRINITY_DN21933_c0_g2,TRINITY_DN2213_c0_g1,TRINITY_DN2401_c0_g1,TRINITY_DN309_c0_g1,TRINITY_DN41669_c0_g1,TRINITY_DN43272_c0_g1,TRINITY_DN4343_c0_g1,TRINITY_DN4343_c1_g1,TRINITY_DN43952_c0_g1,TRINITY_DN44507_c0_g1,TRINITY_DN4…
BP	GO:0010411	xyloglucan metabolic process	15	11	26	54	6.9e-05	0.00400114	TRINITY_DN10427_c0_g1,TRINITY_DN10885_c0_g1,TRINITY_DN1587_c0_g1,TRINITY_DN18145_c0_g1,TRINITY_DN2571_c0_g1,TRINITY_DN2971_c0_g1,TRINITY_DN4958_c0_g1,TRINITY_DN51767_c0_g1,TRINITY_DN5287_c0_g1,TRINITY_DN5516_c0_g1,TRINITY_DN7307_c1_g1,TRINITY_DN7307_c1_g2,TRINITY_DN8103_c0_g1,TRINITY_DN9135_c0_g1,TRINITY_DN9938_c0_g1	TRINITY_DN11440_c0_g1,TRINITY_DN24311_c0_g1,TRINITY_DN28709_c0_g2,TRINITY_DN28709_c0_g4,TRINITY_DN28709_c0_g5,TRINITY_DN3733_c0_g1,TRINITY_DN3981_c0_g1,TRINITY_DN3981_c0_g2,TRINITY_DN44302_c0_g1,TRINITY_DN64776_c0_g1,TRINITY_DN87344_c0_g1
BP	GO:0046394	carboxylic acid biosynthetic process	97	230	327	1154	6.9e-05	0.00400114	TRINITY_DN101353_c0_g1,TRINITY_DN10301_c0_g1,TRINITY_DN103968_c0_g1,TRINITY_DN104720_c0_g1,TRINITY_DN10978_c0_g2,TRINITY_DN11342_c0_g1,TRINITY_DN11355_c0_g1,TRINITY_DN11424_c0_g1,TRINITY_DN11424_c0_g2,TRINITY_DN11608_c0_g2,TRINITY_DN11617_c0_g1,TRINITY_DN117158_c0_g1,TRINITY_DN1171_c1_g1,TRINITY_DN12200_c0_g2,TRINITY_DN12446_c0_g1,TRINITY_DN12741_c0_g1,TRINITY_DN12766_c1_g1,TRINITY_DN13034_c0_g1,…	TRINITY_DN10012_c0_g1,TRINITY_DN100563_c0_g1,TRINITY_DN101361_c0_g1,TRINITY_DN10291_c2_g1,TRINITY_DN10291_c2_g3,TRINITY_DN10425_c1_g1,TRINITY_DN104516_c0_g1,TRINITY_DN104775_c0_g1,TRINITY_DN10591_c0_g1,TRINITY_DN10761_c0_g1,TRINITY_DN107707_c0_g1,TRINITY_DN107841_c0_g1,TRINITY_DN108003_c0_g1,TRINITY_DN10994_c0_g1,TRINITY_DN11038_c0_g1,TRINITY_DN11099_c0_g1,TRINITY_DN111266_c0_g1,TRINITY_DN11205_c…
BP	GO:0000160	phosphorelay signal transduction system	63	64	127	397	7e-05	0.00403407	TRINITY_DN10401_c0_g1,TRINITY_DN10645_c0_g1,TRINITY_DN10700_c0_g2,TRINITY_DN10888_c0_g1,TRINITY_DN109726_c0_g1,TRINITY_DN10993_c0_g1,TRINITY_DN11050_c0_g1,TRINITY_DN11083_c0_g1,TRINITY_DN111968_c0_g1,TRINITY_DN113401_c0_g1,TRINITY_DN11627_c0_g1,TRINITY_DN120471_c0_g1,TRINITY_DN12627_c0_g1,TRINITY_DN13114_c0_g1,TRINITY_DN13151_c0_g1,TRINITY_DN14076_c0_g1,TRINITY_DN15031_c0_g1,TRINITY_DN15219_c0_g2…	TRINITY_DN100544_c0_g1,TRINITY_DN10142_c0_g1,TRINITY_DN10291_c2_g1,TRINITY_DN10291_c2_g3,TRINITY_DN1065_c0_g1,TRINITY_DN11366_c0_g1,TRINITY_DN11395_c0_g1,TRINITY_DN11603_c0_g1,TRINITY_DN12010_c0_g1,TRINITY_DN12020_c0_g1,TRINITY_DN120572_c0_g1,TRINITY_DN12902_c0_g1,TRINITY_DN13811_c0_g1,TRINITY_DN14296_c1_g1,TRINITY_DN17639_c0_g2,TRINITY_DN17639_c0_g3,TRINITY_DN17882_c0_g1,TRINITY_DN178_c0_g1,TRIN…
BP	GO:0042744	hydrogen peroxide catabolic process	21	22	43	106	7.3e-05	0.00418115	TRINITY_DN10074_c0_g1,TRINITY_DN108313_c0_g1,TRINITY_DN12665_c0_g1,TRINITY_DN13359_c0_g1,TRINITY_DN13689_c0_g1,TRINITY_DN15424_c0_g1,TRINITY_DN15640_c0_g1,TRINITY_DN17582_c0_g1,TRINITY_DN19717_c0_g1,TRINITY_DN20174_c0_g1,TRINITY_DN22118_c0_g1,TRINITY_DN2401_c0_g2,TRINITY_DN2401_c0_g3,TRINITY_DN3060_c0_g4,TRINITY_DN4288_c0_g2,TRINITY_DN4603_c0_g1,TRINITY_DN6633_c0_g3,TRINITY_DN6978_c0_g1,TRINITY_D…	TRINITY_DN10831_c0_g1,TRINITY_DN11190_c0_g1,TRINITY_DN1201_c0_g1,TRINITY_DN1201_c0_g3,TRINITY_DN12491_c0_g1,TRINITY_DN14280_c0_g1,TRINITY_DN14280_c1_g1,TRINITY_DN20098_c0_g1,TRINITY_DN21933_c0_g2,TRINITY_DN2401_c0_g1,TRINITY_DN41669_c0_g1,TRINITY_DN43272_c0_g1,TRINITY_DN4343_c0_g1,TRINITY_DN4343_c1_g1,TRINITY_DN44507_c0_g1,TRINITY_DN49116_c0_g2,TRINITY_DN5451_c0_g1,TRINITY_DN5861_c0_g1,TRINITY_DN…
BP	GO:0016053	organic acid biosynthetic process	97	230	327	1155	7.4e-05	0.00418705	TRINITY_DN101353_c0_g1,TRINITY_DN10301_c0_g1,TRINITY_DN103968_c0_g1,TRINITY_DN104720_c0_g1,TRINITY_DN10978_c0_g2,TRINITY_DN11342_c0_g1,TRINITY_DN11355_c0_g1,TRINITY_DN11424_c0_g1,TRINITY_DN11424_c0_g2,TRINITY_DN11608_c0_g2,TRINITY_DN11617_c0_g1,TRINITY_DN117158_c0_g1,TRINITY_DN1171_c1_g1,TRINITY_DN12200_c0_g2,TRINITY_DN12446_c0_g1,TRINITY_DN12741_c0_g1,TRINITY_DN12766_c1_g1,TRINITY_DN13034_c0_g1,…	TRINITY_DN10012_c0_g1,TRINITY_DN100563_c0_g1,TRINITY_DN101361_c0_g1,TRINITY_DN10291_c2_g1,TRINITY_DN10291_c2_g3,TRINITY_DN10425_c1_g1,TRINITY_DN104516_c0_g1,TRINITY_DN104775_c0_g1,TRINITY_DN10591_c0_g1,TRINITY_DN10761_c0_g1,TRINITY_DN107707_c0_g1,TRINITY_DN107841_c0_g1,TRINITY_DN108003_c0_g1,TRINITY_DN10994_c0_g1,TRINITY_DN11038_c0_g1,TRINITY_DN11099_c0_g1,TRINITY_DN111266_c0_g1,TRINITY_DN11205_c…
BP	GO:0042254	ribosome biogenesis	6	218	224	759	7.4e-05	0.00418705	TRINITY_DN17264_c0_g1,TRINITY_DN35464_c0_g1,TRINITY_DN47236_c0_g2,TRINITY_DN6901_c0_g1,TRINITY_DN857_c0_g1,TRINITY_DN8617_c0_g1	TRINITY_DN100728_c0_g1,TRINITY_DN100860_c0_g1,TRINITY_DN100883_c0_g1,TRINITY_DN100983_c0_g1,TRINITY_DN101058_c0_g1,TRINITY_DN101214_c0_g1,TRINITY_DN101686_c0_g1,TRINITY_DN101896_c0_g1,TRINITY_DN102475_c0_g1,TRINITY_DN103539_c0_g1,TRINITY_DN104016_c0_g1,TRINITY_DN104038_c0_g1,TRINITY_DN104072_c0_g1,TRINITY_DN104409_c0_g1,TRINITY_DN104627_c0_g1,TRINITY_DN104776_c0_g1,TRINITY_DN104828_c0_g1,TRINITY_…
BP	GO:0030574	collagen catabolic process	0	16	16	27	7.5e-05	0.00419281	-	TRINITY_DN103536_c0_g1,TRINITY_DN103565_c0_g1,TRINITY_DN112390_c0_g1,TRINITY_DN116216_c0_g1,TRINITY_DN121696_c0_g1,TRINITY_DN13893_c0_g1,TRINITY_DN17348_c0_g1,TRINITY_DN17348_c1_g3,TRINITY_DN18669_c0_g1,TRINITY_DN21326_c0_g2,TRINITY_DN25134_c1_g1,TRINITY_DN28856_c1_g1,TRINITY_DN31620_c0_g2,TRINITY_DN34008_c0_g1,TRINITY_DN37388_c0_g1,TRINITY_DN46970_c0_g1
BP	GO:0032963	collagen metabolic process	0	16	16	27	7.5e-05	0.00419281	-	TRINITY_DN103536_c0_g1,TRINITY_DN103565_c0_g1,TRINITY_DN112390_c0_g1,TRINITY_DN116216_c0_g1,TRINITY_DN121696_c0_g1,TRINITY_DN13893_c0_g1,TRINITY_DN17348_c0_g1,TRINITY_DN17348_c1_g3,TRINITY_DN18669_c0_g1,TRINITY_DN21326_c0_g2,TRINITY_DN25134_c1_g1,TRINITY_DN28856_c1_g1,TRINITY_DN31620_c0_g2,TRINITY_DN34008_c0_g1,TRINITY_DN37388_c0_g1,TRINITY_DN46970_c0_g1
MF	GO:0016168	chlorophyll binding	23	8	31	68	7.8e-05	0.00433457	TRINITY_DN10618_c0_g1,TRINITY_DN10840_c0_g1,TRINITY_DN11954_c0_g1,TRINITY_DN121857_c0_g1,TRINITY_DN13120_c0_g1,TRINITY_DN14201_c0_g1,TRINITY_DN15654_c0_g1,TRINITY_DN18258_c0_g2,TRINITY_DN18838_c0_g4,TRINITY_DN19123_c0_g1,TRINITY_DN4017_c0_g1,TRINITY_DN4017_c0_g2,TRINITY_DN4041_c0_g1,TRINITY_DN4441_c0_g1,TRINITY_DN51549_c0_g2,TRINITY_DN5181_c0_g1,TRINITY_DN5815_c0_g2,TRINITY_DN6261_c0_g1,TRINITY_D…	TRINITY_DN18141_c0_g1,TRINITY_DN19489_c0_g1,TRINITY_DN19489_c0_g2,TRINITY_DN20274_c0_g1,TRINITY_DN21156_c1_g1,TRINITY_DN25896_c0_g1,TRINITY_DN5514_c0_g1,TRINITY_DN7987_c0_g1
BP	GO:0009620	response to fungus	67	122	189	628	8.3e-05	0.00458514	TRINITY_DN100945_c0_g1,TRINITY_DN1026_c0_g1,TRINITY_DN103505_c0_g1,TRINITY_DN10700_c0_g2,TRINITY_DN108313_c0_g1,TRINITY_DN1108_c0_g1,TRINITY_DN113401_c0_g1,TRINITY_DN11355_c0_g1,TRINITY_DN11417_c0_g2,TRINITY_DN11509_c0_g1,TRINITY_DN12125_c0_g1,TRINITY_DN12357_c0_g1,TRINITY_DN13512_c0_g2,TRINITY_DN13789_c0_g1,TRINITY_DN1409_c0_g1,TRINITY_DN14214_c0_g1,TRINITY_DN14214_c0_g2,TRINITY_DN14521_c0_g1,TR…	TRINITY_DN100951_c0_g1,TRINITY_DN10159_c0_g1,TRINITY_DN10217_c0_g1,TRINITY_DN102_c0_g4,TRINITY_DN107883_c0_g1,TRINITY_DN1108_c0_g2,TRINITY_DN11137_c0_g1,TRINITY_DN11137_c0_g2,TRINITY_DN112199_c0_g1,TRINITY_DN113657_c0_g1,TRINITY_DN114002_c0_g1,TRINITY_DN11402_c0_g1,TRINITY_DN11525_c0_g1,TRINITY_DN11581_c0_g1,TRINITY_DN11604_c0_g3,TRINITY_DN11783_c0_g1,TRINITY_DN118052_c0_g1,TRINITY_DN120925_c0_g1…
BP	GO:0000461	endonucleolytic cleavage to generate mature 3'-end of SSU-rRNA from (SSU-rRNA, 5.8S rRNA, LSU-rRNA)	0	19	19	35	8.5e-05	0.004668	-	TRINITY_DN100883_c0_g1,TRINITY_DN112713_c0_g1,TRINITY_DN113861_c0_g1,TRINITY_DN116671_c0_g1,TRINITY_DN117275_c0_g1,TRINITY_DN15359_c0_g1,TRINITY_DN16023_c0_g1,TRINITY_DN16518_c0_g1,TRINITY_DN23073_c0_g1,TRINITY_DN23073_c0_g2,TRINITY_DN23073_c1_g1,TRINITY_DN24828_c0_g1,TRINITY_DN26415_c0_g1,TRINITY_DN26612_c0_g1,TRINITY_DN29079_c0_g1,TRINITY_DN34864_c0_g1,TRINITY_DN45134_c0_g1,TRINITY_DN45134_c2_g…
CC	GO:0005764	lysosome	13	81	94	282	8.6e-05	0.0046953	TRINITY_DN105495_c0_g1,TRINITY_DN12200_c0_g2,TRINITY_DN123184_c0_g1,TRINITY_DN14214_c0_g1,TRINITY_DN14214_c0_g2,TRINITY_DN1442_c0_g1,TRINITY_DN1481_c0_g1,TRINITY_DN17674_c0_g1,TRINITY_DN66081_c0_g2,TRINITY_DN6756_c0_g1,TRINITY_DN7463_c0_g1,TRINITY_DN75879_c0_g1,TRINITY_DN7617_c0_g1	TRINITY_DN100919_c0_g1,TRINITY_DN100951_c0_g1,TRINITY_DN1031_c0_g1,TRINITY_DN103536_c0_g1,TRINITY_DN103565_c0_g1,TRINITY_DN104876_c0_g1,TRINITY_DN104948_c0_g1,TRINITY_DN108206_c0_g1,TRINITY_DN112071_c0_g1,TRINITY_DN112199_c0_g1,TRINITY_DN112390_c0_g1,TRINITY_DN112443_c0_g1,TRINITY_DN113152_c0_g1,TRINITY_DN113246_c0_g1,TRINITY_DN114491_c0_g1,TRINITY_DN116216_c0_g1,TRINITY_DN117742_c0_g1,TRINITY_DN…
BP	GO:0006541	glutamine metabolic process	13	25	38	91	9e-05	0.00488512	TRINITY_DN10978_c0_g2,TRINITY_DN12446_c0_g1,TRINITY_DN12595_c0_g1,TRINITY_DN16989_c0_g1,TRINITY_DN18933_c0_g1,TRINITY_DN2335_c0_g1,TRINITY_DN23377_c0_g1,TRINITY_DN27891_c0_g1,TRINITY_DN3274_c0_g1,TRINITY_DN4133_c0_g1,TRINITY_DN5076_c0_g1,TRINITY_DN5410_c0_g1,TRINITY_DN5414_c0_g1	TRINITY_DN10994_c0_g1,TRINITY_DN11038_c0_g1,TRINITY_DN116615_c0_g1,TRINITY_DN22759_c0_g1,TRINITY_DN23253_c0_g1,TRINITY_DN25366_c0_g1,TRINITY_DN26326_c1_g1,TRINITY_DN26330_c0_g1,TRINITY_DN2692_c0_g1,TRINITY_DN30952_c0_g2,TRINITY_DN30952_c0_g4,TRINITY_DN32400_c0_g1,TRINITY_DN34410_c0_g1,TRINITY_DN36941_c0_g1,TRINITY_DN3970_c0_g1,TRINITY_DN3970_c1_g1,TRINITY_DN3970_c1_g2,TRINITY_DN44628_c0_g1,TRINIT…
CC	GO:0000325	plant-type vacuole	27	75	102	311	9.1e-05	0.00491084	TRINITY_DN101651_c0_g1,TRINITY_DN10534_c0_g1,TRINITY_DN11938_c0_g1,TRINITY_DN13837_c0_g1,TRINITY_DN14214_c0_g1,TRINITY_DN14214_c0_g2,TRINITY_DN14540_c0_g1,TRINITY_DN14577_c0_g1,TRINITY_DN14581_c0_g1,TRINITY_DN15716_c0_g1,TRINITY_DN16551_c1_g1,TRINITY_DN16702_c0_g1,TRINITY_DN1779_c0_g1,TRINITY_DN2248_c1_g1,TRINITY_DN22826_c0_g1,TRINITY_DN23952_c0_g1,TRINITY_DN2891_c2_g1,TRINITY_DN30598_c0_g1,TRINI…	TRINITY_DN100951_c0_g1,TRINITY_DN100955_c0_g1,TRINITY_DN104909_c0_g1,TRINITY_DN105270_c0_g1,TRINITY_DN112199_c0_g1,TRINITY_DN116465_c0_g1,TRINITY_DN1169_c0_g1,TRINITY_DN1169_c0_g2,TRINITY_DN11975_c0_g1,TRINITY_DN12069_c0_g1,TRINITY_DN12069_c0_g3,TRINITY_DN12219_c0_g1,TRINITY_DN12689_c0_g1,TRINITY_DN13381_c0_g3,TRINITY_DN13823_c0_g1,TRINITY_DN13823_c0_g2,TRINITY_DN14832_c0_g1,TRINITY_DN14991_c0_g1…
BP	GO:0042273	ribosomal large subunit biogenesis	1	82	83	242	9.6e-05	0.0051509	TRINITY_DN35464_c0_g1	TRINITY_DN100860_c0_g1,TRINITY_DN101686_c0_g1,TRINITY_DN104409_c0_g1,TRINITY_DN104627_c0_g1,TRINITY_DN106063_c0_g1,TRINITY_DN106215_c0_g1,TRINITY_DN107806_c0_g1,TRINITY_DN108354_c0_g1,TRINITY_DN108615_c0_g1,TRINITY_DN109069_c0_g1,TRINITY_DN109833_c0_g1,TRINITY_DN112025_c0_g1,TRINITY_DN113588_c0_g1,TRINITY_DN113742_c0_g1,TRINITY_DN113782_c0_g1,TRINITY_DN11418_c0_g2,TRINITY_DN114211_c0_g1,TRINITY_D…
BP	GO:0046718	viral entry into host cell	0	15	15	25	0.0001	0.00533486	-	TRINITY_DN103536_c0_g1,TRINITY_DN103565_c0_g1,TRINITY_DN112390_c0_g1,TRINITY_DN116216_c0_g1,TRINITY_DN121696_c0_g1,TRINITY_DN13893_c0_g1,TRINITY_DN17348_c0_g1,TRINITY_DN17348_c1_g3,TRINITY_DN18669_c0_g1,TRINITY_DN21326_c0_g2,TRINITY_DN25134_c1_g1,TRINITY_DN28856_c1_g1,TRINITY_DN34008_c0_g1,TRINITY_DN37388_c0_g1,TRINITY_DN46970_c0_g1
BP	GO:0044283	small molecule biosynthetic process	124	282	406	1470	0.00011	0.005835	TRINITY_DN101353_c0_g1,TRINITY_DN10301_c0_g1,TRINITY_DN103968_c0_g1,TRINITY_DN104720_c0_g1,TRINITY_DN107962_c0_g1,TRINITY_DN10866_c0_g1,TRINITY_DN10978_c0_g2,TRINITY_DN11080_c1_g1,TRINITY_DN11342_c0_g1,TRINITY_DN11355_c0_g1,TRINITY_DN11424_c0_g1,TRINITY_DN11424_c0_g2,TRINITY_DN11573_c0_g1,TRINITY_DN11608_c0_g2,TRINITY_DN11617_c0_g1,TRINITY_DN11701_c0_g1,TRINITY_DN117158_c0_g1,TRINITY_DN1171_c1_g1…	TRINITY_DN10012_c0_g1,TRINITY_DN100563_c0_g1,TRINITY_DN101361_c0_g1,TRINITY_DN10291_c2_g1,TRINITY_DN10291_c2_g3,TRINITY_DN10425_c1_g1,TRINITY_DN104516_c0_g1,TRINITY_DN104775_c0_g1,TRINITY_DN10591_c0_g1,TRINITY_DN10625_c0_g1,TRINITY_DN10761_c0_g1,TRINITY_DN107707_c0_g1,TRINITY_DN107841_c0_g1,TRINITY_DN108003_c0_g1,TRINITY_DN109180_c0_g1,TRINITY_DN10994_c0_g1,TRINITY_DN11038_c0_g1,TRINITY_DN11099_c…
BP	GO:0051186	cofactor metabolic process	86	226	312	1103	0.00012	0.00625877	TRINITY_DN10074_c0_g1,TRINITY_DN101097_c0_g1,TRINITY_DN10462_c0_g1,TRINITY_DN108313_c0_g1,TRINITY_DN10866_c0_g1,TRINITY_DN11415_c0_g1,TRINITY_DN11424_c0_g1,TRINITY_DN11424_c0_g2,TRINITY_DN12285_c0_g1,TRINITY_DN12665_c0_g1,TRINITY_DN13034_c0_g1,TRINITY_DN13270_c0_g1,TRINITY_DN13359_c0_g1,TRINITY_DN13689_c0_g1,TRINITY_DN14351_c0_g1,TRINITY_DN14375_c0_g1,TRINITY_DN14417_c0_g1,TRINITY_DN1442_c1_g1,TR…	TRINITY_DN100009_c0_g1,TRINITY_DN100343_c0_g1,TRINITY_DN100563_c0_g1,TRINITY_DN101361_c0_g1,TRINITY_DN103933_c0_g1,TRINITY_DN10425_c1_g1,TRINITY_DN104775_c0_g1,TRINITY_DN1065_c0_g1,TRINITY_DN10761_c0_g1,TRINITY_DN107707_c0_g1,TRINITY_DN10773_c0_g1,TRINITY_DN107841_c0_g1,TRINITY_DN10831_c0_g1,TRINITY_DN108652_c0_g1,TRINITY_DN109551_c0_g1,TRINITY_DN11190_c0_g1,TRINITY_DN111993_c0_g1,TRINITY_DN11214…
BP	GO:0009873	ethylene-activated signaling pathway	49	58	107	329	0.00012	0.00625877	TRINITY_DN10645_c0_g1,TRINITY_DN10700_c0_g2,TRINITY_DN10888_c0_g1,TRINITY_DN109726_c0_g1,TRINITY_DN10993_c0_g1,TRINITY_DN11050_c0_g1,TRINITY_DN11083_c0_g1,TRINITY_DN111968_c0_g1,TRINITY_DN113401_c0_g1,TRINITY_DN120471_c0_g1,TRINITY_DN12627_c0_g1,TRINITY_DN13114_c0_g1,TRINITY_DN14076_c0_g1,TRINITY_DN15031_c0_g1,TRINITY_DN15219_c0_g2,TRINITY_DN16366_c0_g1,TRINITY_DN18054_c0_g1,TRINITY_DN19512_c0_g1…	TRINITY_DN100544_c0_g1,TRINITY_DN10291_c2_g1,TRINITY_DN10291_c2_g3,TRINITY_DN1065_c0_g1,TRINITY_DN11395_c0_g1,TRINITY_DN11603_c0_g1,TRINITY_DN12010_c0_g1,TRINITY_DN12020_c0_g1,TRINITY_DN120572_c0_g1,TRINITY_DN12902_c0_g1,TRINITY_DN13811_c0_g1,TRINITY_DN14296_c1_g1,TRINITY_DN17639_c0_g2,TRINITY_DN17639_c0_g3,TRINITY_DN17882_c0_g1,TRINITY_DN178_c0_g1,TRINITY_DN17937_c0_g1,TRINITY_DN2012_c3_g1,TRINI…
BP	GO:0009735	response to cytokinin	44	104	148	479	0.00012	0.00625877	TRINITY_DN103505_c0_g1,TRINITY_DN10401_c0_g1,TRINITY_DN11050_c0_g1,TRINITY_DN11080_c1_g1,TRINITY_DN11090_c1_g1,TRINITY_DN113081_c0_g1,TRINITY_DN11627_c0_g1,TRINITY_DN12665_c0_g1,TRINITY_DN13114_c0_g1,TRINITY_DN14201_c0_g1,TRINITY_DN14214_c0_g1,TRINITY_DN14214_c0_g2,TRINITY_DN15420_c0_g4,TRINITY_DN19801_c0_g1,TRINITY_DN20489_c0_g1,TRINITY_DN20717_c0_g2,TRINITY_DN2158_c0_g1,TRINITY_DN23532_c0_g1,TR…	TRINITY_DN100489_c0_g1,TRINITY_DN100955_c0_g1,TRINITY_DN103891_c0_g1,TRINITY_DN103933_c0_g1,TRINITY_DN104341_c0_g1,TRINITY_DN104627_c0_g1,TRINITY_DN10596_c0_g1,TRINITY_DN106215_c0_g1,TRINITY_DN107689_c0_g1,TRINITY_DN107924_c0_g1,TRINITY_DN10815_c0_g2,TRINITY_DN10831_c0_g1,TRINITY_DN108337_c0_g1,TRINITY_DN108473_c0_g1,TRINITY_DN108615_c0_g1,TRINITY_DN112003_c0_g1,TRINITY_DN112911_c0_g1,TRINITY_DN1…
BP	GO:0009064	glutamine family amino acid metabolic process	19	47	66	185	0.00013	0.00674267	TRINITY_DN10563_c0_g1,TRINITY_DN10978_c0_g2,TRINITY_DN12446_c0_g1,TRINITY_DN12595_c0_g1,TRINITY_DN16568_c0_g1,TRINITY_DN16989_c0_g1,TRINITY_DN18933_c0_g1,TRINITY_DN2335_c0_g1,TRINITY_DN23377_c0_g1,TRINITY_DN25281_c0_g1,TRINITY_DN27891_c0_g1,TRINITY_DN3274_c0_g1,TRINITY_DN3381_c0_g1,TRINITY_DN4133_c0_g1,TRINITY_DN5076_c0_g1,TRINITY_DN5410_c0_g1,TRINITY_DN5414_c0_g1,TRINITY_DN78066_c0_g2,TRINITY_DN…	TRINITY_DN104516_c0_g1,TRINITY_DN108003_c0_g1,TRINITY_DN10994_c0_g1,TRINITY_DN11038_c0_g1,TRINITY_DN116615_c0_g1,TRINITY_DN16227_c0_g1,TRINITY_DN19039_c0_g1,TRINITY_DN20457_c0_g1,TRINITY_DN21699_c0_g1,TRINITY_DN22196_c0_g1,TRINITY_DN22759_c0_g1,TRINITY_DN23007_c0_g1,TRINITY_DN23253_c0_g1,TRINITY_DN23280_c0_g1,TRINITY_DN25167_c0_g1,TRINITY_DN25366_c0_g1,TRINITY_DN26326_c1_g1,TRINITY_DN26330_c0_g1,…
BP	GO:0006407	rRNA export from nucleus	0	16	16	28	0.00014	0.00706508	-	TRINITY_DN100883_c0_g1,TRINITY_DN116671_c0_g1,TRINITY_DN117275_c0_g1,TRINITY_DN16023_c0_g1,TRINITY_DN21188_c0_g1,TRINITY_DN23073_c0_g1,TRINITY_DN23073_c0_g2,TRINITY_DN23073_c1_g1,TRINITY_DN24828_c0_g1,TRINITY_DN26415_c0_g1,TRINITY_DN26612_c0_g1,TRINITY_DN29079_c0_g1,TRINITY_DN34864_c0_g1,TRINITY_DN45134_c0_g1,TRINITY_DN45134_c2_g1,TRINITY_DN70192_c0_g1
BP	GO:0051029	rRNA transport	0	16	16	28	0.00014	0.00706508	-	TRINITY_DN100883_c0_g1,TRINITY_DN116671_c0_g1,TRINITY_DN117275_c0_g1,TRINITY_DN16023_c0_g1,TRINITY_DN21188_c0_g1,TRINITY_DN23073_c0_g1,TRINITY_DN23073_c0_g2,TRINITY_DN23073_c1_g1,TRINITY_DN24828_c0_g1,TRINITY_DN26415_c0_g1,TRINITY_DN26612_c0_g1,TRINITY_DN29079_c0_g1,TRINITY_DN34864_c0_g1,TRINITY_DN45134_c0_g1,TRINITY_DN45134_c2_g1,TRINITY_DN70192_c0_g1
BP	GO:0034599	cellular response to oxidative stress	15	55	70	199	0.00014	0.00706508	TRINITY_DN10074_c0_g1,TRINITY_DN11050_c0_g1,TRINITY_DN13916_c0_g1,TRINITY_DN15097_c0_g1,TRINITY_DN18190_c0_g1,TRINITY_DN1843_c0_g1,TRINITY_DN1858_c0_g1,TRINITY_DN20174_c0_g1,TRINITY_DN2737_c0_g1,TRINITY_DN5204_c0_g1,TRINITY_DN640_c0_g1,TRINITY_DN7489_c0_g1,TRINITY_DN78066_c0_g2,TRINITY_DN8014_c2_g1,TRINITY_DN8678_c1_g1	TRINITY_DN103491_c0_g1,TRINITY_DN103925_c0_g1,TRINITY_DN104775_c0_g1,TRINITY_DN10831_c0_g1,TRINITY_DN113263_c0_g1,TRINITY_DN11383_c0_g1,TRINITY_DN11712_c0_g1,TRINITY_DN12766_c0_g1,TRINITY_DN12766_c0_g2,TRINITY_DN13144_c0_g2,TRINITY_DN13640_c0_g1,TRINITY_DN15624_c0_g1,TRINITY_DN15922_c0_g1,TRINITY_DN16388_c1_g1,TRINITY_DN16388_c1_g2,TRINITY_DN18485_c0_g1,TRINITY_DN20031_c0_g1,TRINITY_DN20530_c0_g1…
BP	GO:0009835	fruit ripening	7	7	14	23	0.00014	0.00706508	TRINITY_DN101353_c0_g1,TRINITY_DN4065_c1_g1,TRINITY_DN4724_c3_g1,TRINITY_DN572_c0_g2,TRINITY_DN572_c1_g1,TRINITY_DN59608_c0_g1,TRINITY_DN7274_c2_g1	TRINITY_DN11380_c0_g1,TRINITY_DN120740_c0_g1,TRINITY_DN1521_c1_g1,TRINITY_DN15922_c0_g1,TRINITY_DN16252_c0_g1,TRINITY_DN21819_c0_g1,TRINITY_DN9820_c0_g1
BP	GO:0072330	monocarboxylic acid biosynthetic process	48	136	184	615	0.00014	0.00706508	TRINITY_DN101353_c0_g1,TRINITY_DN103968_c0_g1,TRINITY_DN104720_c0_g1,TRINITY_DN11355_c0_g1,TRINITY_DN11424_c0_g1,TRINITY_DN11424_c0_g2,TRINITY_DN11608_c0_g2,TRINITY_DN117158_c0_g1,TRINITY_DN1171_c1_g1,TRINITY_DN12200_c0_g2,TRINITY_DN12741_c0_g1,TRINITY_DN12766_c1_g1,TRINITY_DN14532_c0_g1,TRINITY_DN15968_c0_g1,TRINITY_DN16711_c0_g1,TRINITY_DN17109_c0_g1,TRINITY_DN18403_c0_g1,TRINITY_DN1843_c0_g1,T…	TRINITY_DN10012_c0_g1,TRINITY_DN100563_c0_g1,TRINITY_DN10425_c1_g1,TRINITY_DN104775_c0_g1,TRINITY_DN10761_c0_g1,TRINITY_DN107707_c0_g1,TRINITY_DN11099_c0_g1,TRINITY_DN112600_c0_g1,TRINITY_DN11577_c0_g1,TRINITY_DN116721_c0_g1,TRINITY_DN116881_c0_g1,TRINITY_DN116979_c0_g1,TRINITY_DN117087_c0_g1,TRINITY_DN118052_c0_g1,TRINITY_DN11871_c0_g1,TRINITY_DN118773_c0_g1,TRINITY_DN12766_c0_g1,TRINITY_DN12766…
BP	GO:0098869	cellular oxidant detoxification	29	54	83	245	0.00015	0.00752903	TRINITY_DN10074_c0_g1,TRINITY_DN108313_c0_g1,TRINITY_DN1113_c0_g3,TRINITY_DN11519_c0_g1,TRINITY_DN12665_c0_g1,TRINITY_DN12766_c1_g1,TRINITY_DN13359_c0_g1,TRINITY_DN13689_c0_g1,TRINITY_DN15424_c0_g1,TRINITY_DN15640_c0_g1,TRINITY_DN17582_c0_g1,TRINITY_DN19717_c0_g1,TRINITY_DN20174_c0_g1,TRINITY_DN22118_c0_g1,TRINITY_DN22597_c0_g1,TRINITY_DN2401_c0_g2,TRINITY_DN2401_c0_g3,TRINITY_DN3060_c0_g4,TRINIT…	TRINITY_DN1065_c0_g1,TRINITY_DN10831_c0_g1,TRINITY_DN11190_c0_g1,TRINITY_DN1201_c0_g1,TRINITY_DN1201_c0_g3,TRINITY_DN122727_c0_g1,TRINITY_DN12491_c0_g1,TRINITY_DN12766_c0_g1,TRINITY_DN12766_c0_g2,TRINITY_DN13144_c0_g2,TRINITY_DN13253_c0_g1,TRINITY_DN14280_c0_g1,TRINITY_DN14280_c1_g1,TRINITY_DN15624_c0_g1,TRINITY_DN16620_c0_g1,TRINITY_DN20098_c0_g1,TRINITY_DN20259_c0_g1,TRINITY_DN20530_c0_g1,TRINI…
MF	GO:0046912	transferase activity, transferring acyl groups, acyl groups converted into alkyl on transfer	6	16	22	44	0.00016	0.00786189	TRINITY_DN11008_c0_g1,TRINITY_DN13132_c0_g1,TRINITY_DN17575_c0_g1,TRINITY_DN21826_c0_g1,TRINITY_DN6502_c0_g1,TRINITY_DN690_c0_g2	TRINITY_DN13957_c1_g1,TRINITY_DN20422_c0_g1,TRINITY_DN24280_c0_g1,TRINITY_DN27667_c0_g1,TRINITY_DN30279_c0_g1,TRINITY_DN32413_c0_g1,TRINITY_DN32455_c0_g1,TRINITY_DN36512_c1_g1,TRINITY_DN38016_c0_g1,TRINITY_DN39527_c0_g1,TRINITY_DN40935_c0_g1,TRINITY_DN46758_c0_g1,TRINITY_DN68325_c0_g1,TRINITY_DN6993_c0_g1,TRINITY_DN81281_c0_g2,TRINITY_DN8571_c0_g1
BP	GO:0009269	response to desiccation	7	13	20	39	0.00016	0.00786189	TRINITY_DN11355_c0_g1,TRINITY_DN19123_c0_g1,TRINITY_DN2541_c0_g1,TRINITY_DN5969_c0_g2,TRINITY_DN6261_c0_g1,TRINITY_DN640_c0_g1,TRINITY_DN7923_c0_g1	TRINITY_DN11190_c0_g1,TRINITY_DN11581_c0_g1,TRINITY_DN121186_c0_g1,TRINITY_DN12155_c0_g1,TRINITY_DN17168_c0_g1,TRINITY_DN20656_c0_g1,TRINITY_DN22769_c0_g1,TRINITY_DN25896_c0_g1,TRINITY_DN26480_c0_g1,TRINITY_DN2846_c0_g1,TRINITY_DN36027_c0_g2,TRINITY_DN57234_c0_g2,TRINITY_DN72198_c0_g1
BP	GO:0071731	response to nitric oxide	3	17	20	39	0.00016	0.00786189	TRINITY_DN11050_c0_g1,TRINITY_DN13916_c0_g1,TRINITY_DN7489_c0_g1	TRINITY_DN104775_c0_g1,TRINITY_DN12766_c0_g1,TRINITY_DN12766_c0_g2,TRINITY_DN13640_c0_g1,TRINITY_DN15922_c0_g1,TRINITY_DN21708_c0_g1,TRINITY_DN2329_c0_g1,TRINITY_DN27506_c0_g1,TRINITY_DN3091_c0_g1,TRINITY_DN32112_c0_g2,TRINITY_DN4001_c0_g1,TRINITY_DN4051_c0_g1,TRINITY_DN4051_c0_g2,TRINITY_DN4089_c0_g1,TRINITY_DN4602_c0_g1,TRINITY_DN5364_c0_g1,TRINITY_DN5963_c0_g1
BP	GO:0097366	response to bronchodilator	3	17	20	39	0.00016	0.00786189	TRINITY_DN11050_c0_g1,TRINITY_DN13916_c0_g1,TRINITY_DN7489_c0_g1	TRINITY_DN104775_c0_g1,TRINITY_DN12766_c0_g1,TRINITY_DN12766_c0_g2,TRINITY_DN13640_c0_g1,TRINITY_DN15922_c0_g1,TRINITY_DN21708_c0_g1,TRINITY_DN2329_c0_g1,TRINITY_DN27506_c0_g1,TRINITY_DN3091_c0_g1,TRINITY_DN32112_c0_g2,TRINITY_DN4001_c0_g1,TRINITY_DN4051_c0_g1,TRINITY_DN4051_c0_g2,TRINITY_DN4089_c0_g1,TRINITY_DN4602_c0_g1,TRINITY_DN5364_c0_g1,TRINITY_DN5963_c0_g1
BP	GO:0071732	cellular response to nitric oxide	3	14	17	31	0.00017	0.00830953	TRINITY_DN11050_c0_g1,TRINITY_DN13916_c0_g1,TRINITY_DN7489_c0_g1	TRINITY_DN104775_c0_g1,TRINITY_DN12766_c0_g1,TRINITY_DN12766_c0_g2,TRINITY_DN13640_c0_g1,TRINITY_DN15922_c0_g1,TRINITY_DN21708_c0_g1,TRINITY_DN2329_c0_g1,TRINITY_DN27506_c0_g1,TRINITY_DN3091_c0_g1,TRINITY_DN4001_c0_g1,TRINITY_DN4089_c0_g1,TRINITY_DN4602_c0_g1,TRINITY_DN5364_c0_g1,TRINITY_DN5963_c0_g1
MF	GO:0080043	quercetin 3-O-glucosyltransferase activity	23	12	35	83	0.00019	0.00909662	TRINITY_DN108374_c0_g1,TRINITY_DN1104_c0_g3,TRINITY_DN1104_c0_g4,TRINITY_DN120385_c0_g1,TRINITY_DN12216_c1_g1,TRINITY_DN13830_c0_g1,TRINITY_DN13835_c0_g1,TRINITY_DN13860_c0_g1,TRINITY_DN15085_c0_g1,TRINITY_DN15090_c0_g1,TRINITY_DN16003_c1_g2,TRINITY_DN16240_c0_g1,TRINITY_DN16505_c0_g1,TRINITY_DN16726_c0_g1,TRINITY_DN1858_c0_g1,TRINITY_DN3102_c0_g1,TRINITY_DN385_c0_g1,TRINITY_DN5464_c0_g2,TRINITY_…	TRINITY_DN1104_c0_g1,TRINITY_DN111954_c0_g1,TRINITY_DN113091_c0_g1,TRINITY_DN13815_c0_g3,TRINITY_DN16003_c1_g1,TRINITY_DN16240_c0_g2,TRINITY_DN1868_c0_g2,TRINITY_DN24577_c0_g1,TRINITY_DN3218_c0_g2,TRINITY_DN5589_c0_g2,TRINITY_DN7389_c0_g1,TRINITY_DN829_c0_g1
MF	GO:0080044	quercetin 7-O-glucosyltransferase activity	23	12	35	83	0.00019	0.00909662	TRINITY_DN108374_c0_g1,TRINITY_DN1104_c0_g3,TRINITY_DN1104_c0_g4,TRINITY_DN120385_c0_g1,TRINITY_DN12216_c1_g1,TRINITY_DN13830_c0_g1,TRINITY_DN13835_c0_g1,TRINITY_DN13860_c0_g1,TRINITY_DN15085_c0_g1,TRINITY_DN15090_c0_g1,TRINITY_DN16003_c1_g2,TRINITY_DN16240_c0_g1,TRINITY_DN16505_c0_g1,TRINITY_DN16726_c0_g1,TRINITY_DN1858_c0_g1,TRINITY_DN3102_c0_g1,TRINITY_DN385_c0_g1,TRINITY_DN5464_c0_g2,TRINITY_…	TRINITY_DN1104_c0_g1,TRINITY_DN111954_c0_g1,TRINITY_DN113091_c0_g1,TRINITY_DN13815_c0_g3,TRINITY_DN16003_c1_g1,TRINITY_DN16240_c0_g2,TRINITY_DN1868_c0_g2,TRINITY_DN24577_c0_g1,TRINITY_DN3218_c0_g2,TRINITY_DN5589_c0_g2,TRINITY_DN7389_c0_g1,TRINITY_DN829_c0_g1
BP	GO:0098660	inorganic ion transmembrane transport	55	171	226	778	0.00019	0.00909662	TRINITY_DN103517_c0_g1,TRINITY_DN10775_c0_g1,TRINITY_DN10918_c0_g1,TRINITY_DN11059_c0_g1,TRINITY_DN112480_c0_g1,TRINITY_DN11387_c0_g1,TRINITY_DN11519_c0_g1,TRINITY_DN1179_c0_g2,TRINITY_DN11988_c0_g1,TRINITY_DN11997_c0_g1,TRINITY_DN120916_c0_g1,TRINITY_DN12200_c0_g2,TRINITY_DN122658_c0_g1,TRINITY_DN12484_c0_g1,TRINITY_DN12970_c0_g1,TRINITY_DN1299_c0_g2,TRINITY_DN13151_c0_g1,TRINITY_DN13229_c0_g1,T…	TRINITY_DN101214_c0_g1,TRINITY_DN101674_c0_g1,TRINITY_DN10368_c0_g1,TRINITY_DN1038_c0_g1,TRINITY_DN103925_c0_g1,TRINITY_DN104516_c0_g1,TRINITY_DN104909_c0_g1,TRINITY_DN107701_c0_g1,TRINITY_DN108718_c0_g1,TRINITY_DN11072_c0_g1,TRINITY_DN113365_c0_g1,TRINITY_DN113408_c0_g1,TRINITY_DN11499_c0_g1,TRINITY_DN11556_c0_g1,TRINITY_DN116465_c0_g1,TRINITY_DN1169_c0_g1,TRINITY_DN1169_c0_g2,TRINITY_DN117598_c…
BP	GO:0032787	monocarboxylic acid metabolic process	74	207	281	990	0.00019	0.00909662	TRINITY_DN101353_c0_g1,TRINITY_DN103968_c0_g1,TRINITY_DN104720_c0_g1,TRINITY_DN1104_c0_g4,TRINITY_DN11172_c0_g1,TRINITY_DN11355_c0_g1,TRINITY_DN11417_c0_g2,TRINITY_DN11424_c0_g1,TRINITY_DN11424_c0_g2,TRINITY_DN11608_c0_g2,TRINITY_DN117158_c0_g1,TRINITY_DN1171_c1_g1,TRINITY_DN12200_c0_g2,TRINITY_DN12224_c0_g1,TRINITY_DN12741_c0_g1,TRINITY_DN12766_c1_g1,TRINITY_DN12999_c0_g2,TRINITY_DN13114_c0_g1,T…	TRINITY_DN10012_c0_g1,TRINITY_DN100563_c0_g1,TRINITY_DN10425_c1_g1,TRINITY_DN104775_c0_g1,TRINITY_DN105499_c0_g1,TRINITY_DN106121_c0_g1,TRINITY_DN10761_c0_g1,TRINITY_DN107670_c0_g1,TRINITY_DN107707_c0_g1,TRINITY_DN10886_c0_g1,TRINITY_DN11099_c0_g1,TRINITY_DN112600_c0_g1,TRINITY_DN113026_c0_g1,TRINITY_DN113810_c0_g1,TRINITY_DN114191_c0_g1,TRINITY_DN11577_c0_g1,TRINITY_DN116721_c0_g1,TRINITY_DN1168…
BP	GO:0042737	drug catabolic process	43	48	91	275	0.0002	0.00952653	TRINITY_DN10074_c0_g1,TRINITY_DN108313_c0_g1,TRINITY_DN109104_c0_g1,TRINITY_DN12665_c0_g1,TRINITY_DN13114_c0_g1,TRINITY_DN13359_c0_g1,TRINITY_DN13574_c0_g1,TRINITY_DN13689_c0_g1,TRINITY_DN13840_c0_g1,TRINITY_DN15424_c0_g1,TRINITY_DN15640_c0_g1,TRINITY_DN16672_c0_g1,TRINITY_DN17280_c0_g1,TRINITY_DN17582_c0_g1,TRINITY_DN17899_c0_g1,TRINITY_DN18805_c1_g1,TRINITY_DN19717_c0_g1,TRINITY_DN19959_c0_g1,T…	TRINITY_DN10831_c0_g1,TRINITY_DN11190_c0_g1,TRINITY_DN111998_c0_g1,TRINITY_DN113026_c0_g1,TRINITY_DN116827_c0_g1,TRINITY_DN1201_c0_g1,TRINITY_DN1201_c0_g3,TRINITY_DN12491_c0_g1,TRINITY_DN14280_c0_g1,TRINITY_DN14280_c1_g1,TRINITY_DN14281_c1_g1,TRINITY_DN16851_c0_g1,TRINITY_DN16893_c0_g1,TRINITY_DN1848_c0_g1,TRINITY_DN19784_c0_g1,TRINITY_DN20098_c0_g1,TRINITY_DN20606_c0_g1,TRINITY_DN20811_c0_g1,TRI…
BP	GO:0072593	reactive oxygen species metabolic process	32	59	91	276	0.00022	0.010426	TRINITY_DN10074_c0_g1,TRINITY_DN10563_c0_g1,TRINITY_DN108313_c0_g1,TRINITY_DN11355_c0_g1,TRINITY_DN12665_c0_g1,TRINITY_DN13359_c0_g1,TRINITY_DN13689_c0_g1,TRINITY_DN15424_c0_g1,TRINITY_DN15640_c0_g1,TRINITY_DN1570_c0_g2,TRINITY_DN17582_c0_g1,TRINITY_DN19123_c0_g1,TRINITY_DN19717_c0_g1,TRINITY_DN20174_c0_g1,TRINITY_DN22118_c0_g1,TRINITY_DN2401_c0_g2,TRINITY_DN2401_c0_g3,TRINITY_DN3060_c0_g4,TRINIT…	TRINITY_DN1065_c0_g1,TRINITY_DN107883_c0_g1,TRINITY_DN10831_c0_g1,TRINITY_DN11190_c0_g1,TRINITY_DN11302_c0_g2,TRINITY_DN114002_c0_g1,TRINITY_DN11707_c0_g1,TRINITY_DN1201_c0_g1,TRINITY_DN1201_c0_g3,TRINITY_DN12491_c0_g1,TRINITY_DN13144_c0_g2,TRINITY_DN14280_c0_g1,TRINITY_DN14280_c1_g1,TRINITY_DN15624_c0_g1,TRINITY_DN16425_c0_g1,TRINITY_DN18956_c0_g2,TRINITY_DN19162_c0_g1,TRINITY_DN20098_c0_g1,TRIN…
CC	GO:0009503	thylakoid light-harvesting complex	5	4	9	12	0.00023	0.0107904	TRINITY_DN13120_c0_g1,TRINITY_DN19123_c0_g1,TRINITY_DN6261_c0_g1,TRINITY_DN7923_c0_g1,TRINITY_DN8854_c0_g1	TRINITY_DN20274_c0_g1,TRINITY_DN21156_c1_g1,TRINITY_DN25896_c0_g1,TRINITY_DN7987_c0_g1
CC	GO:0030076	light-harvesting complex	5	4	9	12	0.00023	0.0107904	TRINITY_DN13120_c0_g1,TRINITY_DN19123_c0_g1,TRINITY_DN6261_c0_g1,TRINITY_DN7923_c0_g1,TRINITY_DN8854_c0_g1	TRINITY_DN20274_c0_g1,TRINITY_DN21156_c1_g1,TRINITY_DN25896_c0_g1,TRINITY_DN7987_c0_g1
MF	GO:0016641	oxidoreductase activity, acting on the CH-NH2 group of donors, oxygen as acceptor	5	10	15	26	0.00024	0.0112032	TRINITY_DN112040_c0_g1,TRINITY_DN120433_c0_g1,TRINITY_DN3905_c1_g1,TRINITY_DN5168_c0_g1,TRINITY_DN7310_c2_g3	TRINITY_DN11293_c0_g1,TRINITY_DN15729_c0_g2,TRINITY_DN15922_c0_g1,TRINITY_DN21276_c0_g1,TRINITY_DN3905_c0_g1,TRINITY_DN3905_c0_g2,TRINITY_DN4602_c0_g1,TRINITY_DN71_c0_g1,TRINITY_DN71_c0_g2,TRINITY_DN7310_c0_g1
MF	GO:0016209	antioxidant activity	28	54	82	241	0.00026	0.0120166	TRINITY_DN10074_c0_g1,TRINITY_DN108313_c0_g1,TRINITY_DN1113_c0_g3,TRINITY_DN11519_c0_g1,TRINITY_DN12665_c0_g1,TRINITY_DN12766_c1_g1,TRINITY_DN13359_c0_g1,TRINITY_DN13689_c0_g1,TRINITY_DN15424_c0_g1,TRINITY_DN15640_c0_g1,TRINITY_DN17582_c0_g1,TRINITY_DN19717_c0_g1,TRINITY_DN20174_c0_g1,TRINITY_DN22118_c0_g1,TRINITY_DN22597_c0_g1,TRINITY_DN2401_c0_g2,TRINITY_DN2401_c0_g3,TRINITY_DN3060_c0_g4,TRINIT…	TRINITY_DN1065_c0_g1,TRINITY_DN10831_c0_g1,TRINITY_DN11190_c0_g1,TRINITY_DN1201_c0_g1,TRINITY_DN1201_c0_g3,TRINITY_DN122727_c0_g1,TRINITY_DN12491_c0_g1,TRINITY_DN12766_c0_g1,TRINITY_DN12766_c0_g2,TRINITY_DN13144_c0_g2,TRINITY_DN13253_c0_g1,TRINITY_DN14280_c0_g1,TRINITY_DN14280_c1_g1,TRINITY_DN15624_c0_g1,TRINITY_DN16620_c0_g1,TRINITY_DN20098_c0_g1,TRINITY_DN20259_c0_g1,TRINITY_DN20530_c0_g1,TRINI…
BP	GO:0030490	maturation of SSU-rRNA	0	52	52	141	0.00026	0.0120166	-	TRINITY_DN100883_c0_g1,TRINITY_DN100983_c0_g1,TRINITY_DN104072_c0_g1,TRINITY_DN108639_c0_g1,TRINITY_DN112562_c0_g1,TRINITY_DN112713_c0_g1,TRINITY_DN113861_c0_g1,TRINITY_DN116340_c0_g1,TRINITY_DN116373_c0_g1,TRINITY_DN116671_c0_g1,TRINITY_DN117275_c0_g1,TRINITY_DN117728_c0_g1,TRINITY_DN120367_c0_g1,TRINITY_DN120391_c0_g1,TRINITY_DN120761_c0_g1,TRINITY_DN13308_c0_g1,TRINITY_DN13308_c1_g2,TRINITY_DN…
BP	GO:0071588	hydrogen peroxide mediated signaling pathway	1	7	8	10	0.00027	0.0124173	TRINITY_DN20174_c0_g1	TRINITY_DN10831_c0_g1,TRINITY_DN1391_c2_g1,TRINITY_DN16637_c0_g1,TRINITY_DN17353_c1_g1,TRINITY_DN24923_c0_g1,TRINITY_DN4409_c0_g1,TRINITY_DN44507_c0_g1
BP	GO:0001890	placenta development	1	16	17	32	0.00028	0.0127516	TRINITY_DN13409_c0_g1	TRINITY_DN103536_c0_g1,TRINITY_DN103565_c0_g1,TRINITY_DN112390_c0_g1,TRINITY_DN116216_c0_g1,TRINITY_DN121696_c0_g1,TRINITY_DN13190_c0_g1,TRINITY_DN13893_c0_g1,TRINITY_DN17348_c0_g1,TRINITY_DN17348_c1_g3,TRINITY_DN18669_c0_g1,TRINITY_DN21326_c0_g2,TRINITY_DN25134_c1_g1,TRINITY_DN28856_c1_g1,TRINITY_DN34008_c0_g1,TRINITY_DN37388_c0_g1,TRINITY_DN46970_c0_g1
BP	GO:0009814	defense response, incompatible interaction	35	68	103	321	0.00028	0.0127516	TRINITY_DN100869_c0_g1,TRINITY_DN1026_c0_g1,TRINITY_DN10975_c0_g1,TRINITY_DN10975_c0_g2,TRINITY_DN113401_c0_g1,TRINITY_DN11417_c0_g2,TRINITY_DN12357_c0_g1,TRINITY_DN13512_c0_g2,TRINITY_DN13528_c0_g1,TRINITY_DN14214_c0_g1,TRINITY_DN14214_c0_g2,TRINITY_DN15536_c0_g1,TRINITY_DN1742_c0_g1,TRINITY_DN17923_c0_g4,TRINITY_DN1906_c0_g1,TRINITY_DN1992_c0_g1,TRINITY_DN20502_c0_g1,TRINITY_DN2284_c0_g1,TRINIT…	TRINITY_DN100389_c0_g1,TRINITY_DN102_c0_g4,TRINITY_DN102_c1_g1,TRINITY_DN107883_c0_g1,TRINITY_DN10922_c0_g1,TRINITY_DN113657_c0_g1,TRINITY_DN11604_c0_g3,TRINITY_DN11783_c0_g1,TRINITY_DN12356_c0_g1,TRINITY_DN12766_c0_g1,TRINITY_DN12766_c0_g2,TRINITY_DN1280_c3_g1,TRINITY_DN13390_c0_g1,TRINITY_DN13512_c0_g1,TRINITY_DN1453_c0_g1,TRINITY_DN15484_c0_g1,TRINITY_DN17401_c0_g1,TRINITY_DN17795_c0_g1,TRINIT…
BP	GO:0009611	response to wounding	54	77	131	424	0.0003	0.0135304	TRINITY_DN101651_c0_g1,TRINITY_DN10195_c0_g1,TRINITY_DN103968_c0_g1,TRINITY_DN10508_c0_g1,TRINITY_DN10602_c0_g1,TRINITY_DN10781_c0_g1,TRINITY_DN10975_c0_g1,TRINITY_DN10975_c0_g2,TRINITY_DN10976_c0_g1,TRINITY_DN10981_c0_g1,TRINITY_DN11229_c0_g1,TRINITY_DN113401_c0_g1,TRINITY_DN11417_c0_g2,TRINITY_DN11643_c0_g1,TRINITY_DN11643_c0_g2,TRINITY_DN1171_c1_g1,TRINITY_DN11766_c0_g1,TRINITY_DN121173_c0_g1,…	TRINITY_DN112613_c0_g1,TRINITY_DN11581_c0_g1,TRINITY_DN11783_c0_g1,TRINITY_DN118052_c0_g1,TRINITY_DN11871_c0_g1,TRINITY_DN11975_c0_g1,TRINITY_DN11989_c0_g2,TRINITY_DN12046_c0_g2,TRINITY_DN120895_c0_g1,TRINITY_DN12728_c0_g1,TRINITY_DN12747_c0_g1,TRINITY_DN1306_c0_g2,TRINITY_DN13225_c0_g1,TRINITY_DN13967_c0_g1,TRINITY_DN14447_c0_g1,TRINITY_DN15469_c0_g1,TRINITY_DN15722_c0_g1,TRINITY_DN1589_c0_g2,TR…
BP	GO:0042743	hydrogen peroxide metabolic process	24	26	50	135	0.0003	0.0135304	TRINITY_DN10074_c0_g1,TRINITY_DN108313_c0_g1,TRINITY_DN12665_c0_g1,TRINITY_DN13359_c0_g1,TRINITY_DN13689_c0_g1,TRINITY_DN15424_c0_g1,TRINITY_DN15640_c0_g1,TRINITY_DN1570_c0_g2,TRINITY_DN17582_c0_g1,TRINITY_DN19717_c0_g1,TRINITY_DN20174_c0_g1,TRINITY_DN22118_c0_g1,TRINITY_DN2401_c0_g2,TRINITY_DN2401_c0_g3,TRINITY_DN3060_c0_g4,TRINITY_DN4288_c0_g2,TRINITY_DN4603_c0_g1,TRINITY_DN6633_c0_g3,TRINITY_D…	TRINITY_DN1065_c0_g1,TRINITY_DN10831_c0_g1,TRINITY_DN11190_c0_g1,TRINITY_DN11707_c0_g1,TRINITY_DN1201_c0_g1,TRINITY_DN1201_c0_g3,TRINITY_DN12491_c0_g1,TRINITY_DN14280_c0_g1,TRINITY_DN14280_c1_g1,TRINITY_DN20098_c0_g1,TRINITY_DN21933_c0_g2,TRINITY_DN2401_c0_g1,TRINITY_DN4164_c0_g2,TRINITY_DN41669_c0_g1,TRINITY_DN43272_c0_g1,TRINITY_DN4343_c0_g1,TRINITY_DN4343_c1_g1,TRINITY_DN44507_c0_g1,TRINITY_DN…
MF	GO:0003746	translation elongation factor activity	3	43	46	120	0.00031	0.0138477	TRINITY_DN10734_c0_g1,TRINITY_DN546_c0_g1,TRINITY_DN879_c2_g1	TRINITY_DN101198_c0_g1,TRINITY_DN10275_c2_g2,TRINITY_DN10773_c0_g1,TRINITY_DN112679_c0_g1,TRINITY_DN112911_c0_g1,TRINITY_DN11392_c0_g1,TRINITY_DN114812_c0_g1,TRINITY_DN11523_c0_g1,TRINITY_DN11523_c1_g1,TRINITY_DN119773_c0_g1,TRINITY_DN122144_c0_g1,TRINITY_DN12957_c0_g1,TRINITY_DN14627_c0_g1,TRINITY_DN17507_c0_g1,TRINITY_DN17507_c1_g1,TRINITY_DN18634_c0_g1,TRINITY_DN18655_c0_g2,TRINITY_DN19923_c0_…
BP	GO:0048878	chemical homeostasis	62	135	197	673	0.00031	0.0138477	TRINITY_DN10019_c0_g1,TRINITY_DN10301_c0_g1,TRINITY_DN10318_c0_g1,TRINITY_DN10534_c0_g1,TRINITY_DN10918_c0_g1,TRINITY_DN109967_c0_g1,TRINITY_DN11262_c0_g1,TRINITY_DN11382_c0_g1,TRINITY_DN12200_c0_g2,TRINITY_DN12572_c0_g1,TRINITY_DN1339_c0_g1,TRINITY_DN1339_c0_g2,TRINITY_DN13916_c0_g1,TRINITY_DN14920_c0_g1,TRINITY_DN15097_c0_g1,TRINITY_DN1568_c0_g2,TRINITY_DN15850_c0_g1,TRINITY_DN1596_c0_g1,TRINIT…	TRINITY_DN100009_c0_g1,TRINITY_DN100489_c0_g1,TRINITY_DN101214_c0_g1,TRINITY_DN10180_c0_g1,TRINITY_DN10229_c0_g1,TRINITY_DN102475_c0_g1,TRINITY_DN103891_c0_g1,TRINITY_DN1045_c0_g1,TRINITY_DN104775_c0_g1,TRINITY_DN1065_c0_g1,TRINITY_DN10761_c0_g1,TRINITY_DN107924_c0_g1,TRINITY_DN112613_c0_g1,TRINITY_DN116465_c0_g1,TRINITY_DN116937_c0_g1,TRINITY_DN117742_c0_g1,TRINITY_DN120622_c0_g1,TRINITY_DN12066…
BP	GO:0009698	phenylpropanoid metabolic process	12	61	73	215	0.00034	0.0150438	TRINITY_DN10778_c0_g1,TRINITY_DN11597_c0_g1,TRINITY_DN1171_c1_g1,TRINITY_DN15640_c0_g1,TRINITY_DN17163_c0_g1,TRINITY_DN17582_c0_g1,TRINITY_DN25383_c0_g1,TRINITY_DN26635_c0_g1,TRINITY_DN3060_c0_g4,TRINITY_DN31702_c0_g1,TRINITY_DN4833_c0_g1,TRINITY_DN77585_c0_g1	TRINITY_DN10012_c0_g1,TRINITY_DN100700_c0_g1,TRINITY_DN10778_c1_g1,TRINITY_DN109508_c0_g1,TRINITY_DN112628_c0_g1,TRINITY_DN11871_c0_g1,TRINITY_DN12248_c0_g1,TRINITY_DN12747_c0_g1,TRINITY_DN14117_c0_g1,TRINITY_DN14130_c0_g1,TRINITY_DN14256_c0_g1,TRINITY_DN14467_c0_g1,TRINITY_DN15019_c0_g1,TRINITY_DN15019_c0_g2,TRINITY_DN15_c2_g1,TRINITY_DN1689_c0_g1,TRINITY_DN17010_c0_g1,TRINITY_DN17917_c0_g1,TRIN…
CC	GO:0009536	plastid	317	628	945	3694	0.00034	0.0150438	TRINITY_DN10043_c0_g1,TRINITY_DN10074_c0_g1,TRINITY_DN101097_c0_g1,TRINITY_DN10179_c0_g1,TRINITY_DN10198_c0_g1,TRINITY_DN10361_c0_g1,TRINITY_DN103968_c0_g1,TRINITY_DN105440_c0_g1,TRINITY_DN105444_c0_g1,TRINITY_DN10549_c0_g1,TRINITY_DN10563_c0_g1,TRINITY_DN10618_c0_g1,TRINITY_DN106454_c0_g1,TRINITY_DN10781_c0_g1,TRINITY_DN108096_c0_g1,TRINITY_DN10828_c0_g1,TRINITY_DN10840_c0_g1,TRINITY_DN1094_c0_g…	TRINITY_DN100343_c0_g1,TRINITY_DN100489_c0_g1,TRINITY_DN100690_c0_g1,TRINITY_DN100860_c0_g1,TRINITY_DN100955_c0_g1,TRINITY_DN100983_c0_g1,TRINITY_DN101175_c0_g1,TRINITY_DN101214_c0_g1,TRINITY_DN101361_c0_g1,TRINITY_DN101503_c0_g1,TRINITY_DN101614_c0_g1,TRINITY_DN101686_c0_g1,TRINITY_DN10169_c0_g1,TRINITY_DN102153_c0_g1,TRINITY_DN102475_c0_g1,TRINITY_DN103891_c0_g1,TRINITY_DN103933_c0_g1,TRINITY_D…
BP	GO:0050832	defense response to fungus	52	97	149	493	0.00036	0.0158536	TRINITY_DN1026_c0_g1,TRINITY_DN103505_c0_g1,TRINITY_DN10700_c0_g2,TRINITY_DN108313_c0_g1,TRINITY_DN1108_c0_g1,TRINITY_DN113401_c0_g1,TRINITY_DN11355_c0_g1,TRINITY_DN11417_c0_g2,TRINITY_DN12357_c0_g1,TRINITY_DN13512_c0_g2,TRINITY_DN1409_c0_g1,TRINITY_DN14214_c0_g1,TRINITY_DN14214_c0_g2,TRINITY_DN14521_c0_g1,TRINITY_DN15536_c0_g1,TRINITY_DN1742_c0_g1,TRINITY_DN1752_c0_g1,TRINITY_DN18039_c0_g1,TRINI…	TRINITY_DN100951_c0_g1,TRINITY_DN10159_c0_g1,TRINITY_DN10217_c0_g1,TRINITY_DN102_c0_g4,TRINITY_DN107883_c0_g1,TRINITY_DN1108_c0_g2,TRINITY_DN11137_c0_g1,TRINITY_DN11137_c0_g2,TRINITY_DN112199_c0_g1,TRINITY_DN113657_c0_g1,TRINITY_DN11525_c0_g1,TRINITY_DN11581_c0_g1,TRINITY_DN11604_c0_g3,TRINITY_DN11783_c0_g1,TRINITY_DN120925_c0_g1,TRINITY_DN12259_c0_g1,TRINITY_DN123395_c0_g1,TRINITY_DN12356_c0_g1,…
BP	GO:0009060	aerobic respiration	8	56	64	184	0.00037	0.0161417	TRINITY_DN1113_c0_g3,TRINITY_DN120916_c0_g1,TRINITY_DN12224_c0_g1,TRINITY_DN13600_c0_g1,TRINITY_DN17575_c0_g1,TRINITY_DN480_c0_g2,TRINITY_DN690_c0_g2,TRINITY_DN7606_c0_g1	TRINITY_DN101674_c0_g1,TRINITY_DN10169_c0_g1,TRINITY_DN103933_c0_g1,TRINITY_DN106121_c0_g1,TRINITY_DN111266_c0_g1,TRINITY_DN123668_c0_g1,TRINITY_DN13352_c0_g1,TRINITY_DN13957_c1_g1,TRINITY_DN14287_c0_g1,TRINITY_DN15522_c1_g1,TRINITY_DN16117_c0_g1,TRINITY_DN16643_c0_g1,TRINITY_DN16650_c0_g1,TRINITY_DN16835_c0_g1,TRINITY_DN16894_c0_g1,TRINITY_DN17686_c0_g1,TRINITY_DN18044_c0_g1,TRINITY_DN18075_c0_g…
CC	GO:0009507	chloroplast	313	616	929	3630	0.00037	0.0161417	TRINITY_DN10043_c0_g1,TRINITY_DN10074_c0_g1,TRINITY_DN101097_c0_g1,TRINITY_DN10179_c0_g1,TRINITY_DN10198_c0_g1,TRINITY_DN10361_c0_g1,TRINITY_DN103968_c0_g1,TRINITY_DN105440_c0_g1,TRINITY_DN105444_c0_g1,TRINITY_DN10563_c0_g1,TRINITY_DN10618_c0_g1,TRINITY_DN106454_c0_g1,TRINITY_DN10781_c0_g1,TRINITY_DN108096_c0_g1,TRINITY_DN10828_c0_g1,TRINITY_DN10840_c0_g1,TRINITY_DN1094_c0_g1,TRINITY_DN10978_c0_g…	TRINITY_DN100343_c0_g1,TRINITY_DN100489_c0_g1,TRINITY_DN100690_c0_g1,TRINITY_DN100860_c0_g1,TRINITY_DN100955_c0_g1,TRINITY_DN100983_c0_g1,TRINITY_DN101175_c0_g1,TRINITY_DN101214_c0_g1,TRINITY_DN101503_c0_g1,TRINITY_DN101614_c0_g1,TRINITY_DN101686_c0_g1,TRINITY_DN10169_c0_g1,TRINITY_DN102153_c0_g1,TRINITY_DN102475_c0_g1,TRINITY_DN103891_c0_g1,TRINITY_DN103933_c0_g1,TRINITY_DN104072_c0_g1,TRINITY_D…
BP	GO:0000027	ribosomal large subunit assembly	1	48	49	133	0.00039	0.0169351	TRINITY_DN35464_c0_g1	TRINITY_DN101686_c0_g1,TRINITY_DN104627_c0_g1,TRINITY_DN106063_c0_g1,TRINITY_DN106215_c0_g1,TRINITY_DN108615_c0_g1,TRINITY_DN109069_c0_g1,TRINITY_DN112025_c0_g1,TRINITY_DN113588_c0_g1,TRINITY_DN114211_c0_g1,TRINITY_DN11623_c1_g1,TRINITY_DN116291_c0_g1,TRINITY_DN11665_c0_g2,TRINITY_DN117323_c0_g1,TRINITY_DN13868_c0_g1,TRINITY_DN14247_c0_g2,TRINITY_DN15089_c0_g1,TRINITY_DN16084_c0_g1,TRINITY_DN1627…
MF	GO:0016798	hydrolase activity, acting on glycosyl bonds	71	71	142	460	0.0004	0.0170521	TRINITY_DN10291_c0_g1,TRINITY_DN10459_c0_g1,TRINITY_DN10864_c0_g1,TRINITY_DN10885_c0_g1,TRINITY_DN11419_c0_g1,TRINITY_DN11737_c0_g1,TRINITY_DN11938_c0_g1,TRINITY_DN121664_c0_g1,TRINITY_DN12357_c0_g1,TRINITY_DN12595_c0_g1,TRINITY_DN1324_c0_g2,TRINITY_DN13276_c0_g1,TRINITY_DN1339_c0_g1,TRINITY_DN1339_c0_g2,TRINITY_DN1442_c0_g1,TRINITY_DN1481_c0_g1,TRINITY_DN15614_c0_g1,TRINITY_DN1587_c0_g1,TRINITY_…	TRINITY_DN105270_c0_g1,TRINITY_DN105594_c0_g1,TRINITY_DN109483_c0_g1,TRINITY_DN10999_c0_g1,TRINITY_DN11252_c0_g1,TRINITY_DN112694_c0_g1,TRINITY_DN11380_c0_g1,TRINITY_DN114391_c0_g1,TRINITY_DN11440_c0_g1,TRINITY_DN121430_c0_g1,TRINITY_DN12806_c0_g1,TRINITY_DN13230_c0_g2,TRINITY_DN13853_c0_g2,TRINITY_DN13909_c0_g1,TRINITY_DN14495_c0_g1,TRINITY_DN1553_c0_g1,TRINITY_DN16252_c0_g1,TRINITY_DN17401_c0_g…
BP	GO:0009416	response to light stimulus	156	189	345	1251	0.0004	0.0170521	TRINITY_DN10098_c0_g1,TRINITY_DN101651_c0_g1,TRINITY_DN10179_c0_g1,TRINITY_DN10301_c0_g1,TRINITY_DN10318_c0_g1,TRINITY_DN103505_c0_g1,TRINITY_DN103509_c0_g1,TRINITY_DN10422_c0_g1,TRINITY_DN10462_c0_g1,TRINITY_DN10508_c0_g1,TRINITY_DN10618_c0_g1,TRINITY_DN10681_c0_g1,TRINITY_DN108313_c0_g1,TRINITY_DN10840_c0_g1,TRINITY_DN10918_c0_g1,TRINITY_DN10978_c0_g2,TRINITY_DN11160_c0_g1,TRINITY_DN11342_c0_g1…	TRINITY_DN100343_c0_g1,TRINITY_DN100356_c0_g1,TRINITY_DN100489_c0_g1,TRINITY_DN100955_c0_g1,TRINITY_DN10129_c0_g2,TRINITY_DN10142_c0_g1,TRINITY_DN101686_c0_g1,TRINITY_DN103891_c0_g1,TRINITY_DN103938_c0_g1,TRINITY_DN104775_c0_g1,TRINITY_DN10591_c0_g1,TRINITY_DN10596_c0_g1,TRINITY_DN107924_c0_g1,TRINITY_DN108440_c0_g1,TRINITY_DN109069_c0_g1,TRINITY_DN10921_c0_g1,TRINITY_DN110319_c0_g1,TRINITY_DN111…
BP	GO:0097064	ncRNA export from nucleus	0	16	16	30	0.0004	0.0170521	-	TRINITY_DN100883_c0_g1,TRINITY_DN116671_c0_g1,TRINITY_DN117275_c0_g1,TRINITY_DN16023_c0_g1,TRINITY_DN21188_c0_g1,TRINITY_DN23073_c0_g1,TRINITY_DN23073_c0_g2,TRINITY_DN23073_c1_g1,TRINITY_DN24828_c0_g1,TRINITY_DN26415_c0_g1,TRINITY_DN26612_c0_g1,TRINITY_DN29079_c0_g1,TRINITY_DN34864_c0_g1,TRINITY_DN45134_c0_g1,TRINITY_DN45134_c2_g1,TRINITY_DN70192_c0_g1
BP	GO:0019722	calcium-mediated signaling	5	34	39	100	0.0004	0.0170521	TRINITY_DN12200_c0_g2,TRINITY_DN12484_c0_g1,TRINITY_DN24232_c0_g1,TRINITY_DN6430_c0_g1,TRINITY_DN729_c0_g2	TRINITY_DN100384_c0_g1,TRINITY_DN104775_c0_g1,TRINITY_DN11027_c0_g1,TRINITY_DN113089_c0_g1,TRINITY_DN11989_c0_g2,TRINITY_DN12066_c0_g1,TRINITY_DN13640_c0_g1,TRINITY_DN14371_c0_g1,TRINITY_DN19246_c0_g1,TRINITY_DN20790_c1_g1,TRINITY_DN24232_c0_g2,TRINITY_DN26364_c0_g1,TRINITY_DN30433_c0_g4,TRINITY_DN30499_c0_g1,TRINITY_DN32112_c0_g2,TRINITY_DN3625_c0_g1,TRINITY_DN3750_c0_g1,TRINITY_DN3750_c1_g2,TRI…
MF	GO:0004427	inorganic diphosphatase activity	4	11	15	27	0.00042	0.0175835	TRINITY_DN10636_c0_g1,TRINITY_DN17835_c0_g1,TRINITY_DN5655_c0_g1,TRINITY_DN5770_c0_g1	TRINITY_DN100669_c0_g1,TRINITY_DN15479_c0_g3,TRINITY_DN1680_c0_g1,TRINITY_DN17887_c0_g1,TRINITY_DN21777_c0_g1,TRINITY_DN28430_c0_g1,TRINITY_DN31935_c0_g1,TRINITY_DN31935_c0_g3,TRINITY_DN41020_c0_g1,TRINITY_DN43900_c0_g1,TRINITY_DN61434_c0_g1
MF	GO:0016624	oxidoreductase activity, acting on the aldehyde or oxo group of donors, disulfide as acceptor	2	13	15	27	0.00042	0.0175835	TRINITY_DN32951_c0_g1,TRINITY_DN480_c0_g2	TRINITY_DN10652_c0_g1,TRINITY_DN107707_c0_g1,TRINITY_DN13783_c0_g2,TRINITY_DN24931_c0_g1,TRINITY_DN24931_c0_g3,TRINITY_DN25314_c0_g2,TRINITY_DN35968_c0_g2,TRINITY_DN56822_c0_g1,TRINITY_DN58476_c0_g1,TRINITY_DN58476_c1_g1,TRINITY_DN58476_c1_g2,TRINITY_DN58555_c0_g1,TRINITY_DN6369_c0_g1
BP	GO:0019253	reductive pentose-phosphate cycle	8	16	24	53	0.00042	0.0175835	TRINITY_DN11080_c1_g1,TRINITY_DN112015_c0_g1,TRINITY_DN11701_c0_g1,TRINITY_DN3201_c0_g1,TRINITY_DN357_c0_g1,TRINITY_DN46429_c0_g1,TRINITY_DN9634_c0_g1,TRINITY_DN9659_c0_g1	TRINITY_DN10425_c1_g1,TRINITY_DN11250_c0_g1,TRINITY_DN11577_c0_g2,TRINITY_DN11577_c0_g3,TRINITY_DN16077_c0_g1,TRINITY_DN17908_c0_g1,TRINITY_DN18738_c0_g1,TRINITY_DN21146_c0_g2,TRINITY_DN21146_c1_g1,TRINITY_DN23246_c0_g1,TRINITY_DN23512_c0_g1,TRINITY_DN30078_c0_g1,TRINITY_DN51659_c0_g2,TRINITY_DN51659_c1_g1,TRINITY_DN8812_c0_g1,TRINITY_DN8812_c1_g1
BP	GO:0019685	photosynthesis, dark reaction	8	16	24	53	0.00042	0.0175835	TRINITY_DN11080_c1_g1,TRINITY_DN112015_c0_g1,TRINITY_DN11701_c0_g1,TRINITY_DN3201_c0_g1,TRINITY_DN357_c0_g1,TRINITY_DN46429_c0_g1,TRINITY_DN9634_c0_g1,TRINITY_DN9659_c0_g1	TRINITY_DN10425_c1_g1,TRINITY_DN11250_c0_g1,TRINITY_DN11577_c0_g2,TRINITY_DN11577_c0_g3,TRINITY_DN16077_c0_g1,TRINITY_DN17908_c0_g1,TRINITY_DN18738_c0_g1,TRINITY_DN21146_c0_g2,TRINITY_DN21146_c1_g1,TRINITY_DN23246_c0_g1,TRINITY_DN23512_c0_g1,TRINITY_DN30078_c0_g1,TRINITY_DN51659_c0_g2,TRINITY_DN51659_c1_g1,TRINITY_DN8812_c0_g1,TRINITY_DN8812_c1_g1
MF	GO:0005509	calcium ion binding	25	123	148	483	0.00044	0.0182571	TRINITY_DN104720_c0_g1,TRINITY_DN10534_c0_g1,TRINITY_DN1113_c0_g3,TRINITY_DN112767_c0_g1,TRINITY_DN11355_c0_g1,TRINITY_DN11519_c0_g1,TRINITY_DN1174_c2_g1,TRINITY_DN12200_c0_g2,TRINITY_DN13769_c0_g2,TRINITY_DN14879_c0_g2,TRINITY_DN15381_c0_g1,TRINITY_DN15733_c0_g1,TRINITY_DN17478_c0_g1,TRINITY_DN17872_c0_g1,TRINITY_DN18190_c0_g1,TRINITY_DN21133_c0_g1,TRINITY_DN22024_c1_g1,TRINITY_DN2453_c0_g1,TRIN…	TRINITY_DN100384_c0_g1,TRINITY_DN102348_c0_g1,TRINITY_DN104531_c0_g1,TRINITY_DN1065_c0_g1,TRINITY_DN10922_c0_g1,TRINITY_DN110034_c0_g1,TRINITY_DN11027_c0_g1,TRINITY_DN11615_c0_g1,TRINITY_DN116937_c0_g1,TRINITY_DN118382_c0_g1,TRINITY_DN118973_c0_g1,TRINITY_DN13358_c1_g1,TRINITY_DN13437_c0_g1,TRINITY_DN13603_c0_g1,TRINITY_DN14371_c0_g1,TRINITY_DN14502_c0_g1,TRINITY_DN14502_c0_g2,TRINITY_DN14502_c1_…
MF	GO:0016832	aldehyde-lyase activity	9	10	19	38	0.00044	0.0182571	TRINITY_DN11417_c0_g2,TRINITY_DN11424_c0_g1,TRINITY_DN11424_c0_g2,TRINITY_DN11766_c0_g1,TRINITY_DN14047_c0_g1,TRINITY_DN15968_c0_g1,TRINITY_DN17891_c0_g1,TRINITY_DN4148_c0_g1,TRINITY_DN9844_c0_g1	TRINITY_DN100563_c0_g1,TRINITY_DN116881_c0_g1,TRINITY_DN16476_c0_g1,TRINITY_DN21351_c0_g1,TRINITY_DN21872_c0_g2,TRINITY_DN22450_c0_g1,TRINITY_DN23498_c0_g1,TRINITY_DN25863_c0_g1,TRINITY_DN33689_c0_g1,TRINITY_DN4588_c0_g2
CC	GO:0009538	photosystem I reaction center	6	4	10	15	0.00045	0.0185894	TRINITY_DN10361_c0_g1,TRINITY_DN4552_c0_g1,TRINITY_DN6562_c0_g1,TRINITY_DN775_c0_g1,TRINITY_DN8491_c0_g1,TRINITY_DN9002_c0_g1	TRINITY_DN118059_c0_g1,TRINITY_DN18008_c0_g1,TRINITY_DN28848_c0_g1,TRINITY_DN34390_c0_g1
BP	GO:0009145	purine nucleoside triphosphate biosynthetic process	12	83	95	296	0.00047	0.0192453	TRINITY_DN11387_c0_g1,TRINITY_DN11424_c0_g1,TRINITY_DN11424_c0_g2,TRINITY_DN15968_c0_g1,TRINITY_DN16711_c0_g1,TRINITY_DN18403_c0_g1,TRINITY_DN20713_c0_g1,TRINITY_DN4632_c0_g1,TRINITY_DN480_c0_g2,TRINITY_DN4978_c0_g1,TRINITY_DN61566_c0_g1,TRINITY_DN8791_c0_g1	TRINITY_DN100563_c0_g1,TRINITY_DN104775_c0_g1,TRINITY_DN10625_c0_g1,TRINITY_DN10761_c0_g1,TRINITY_DN107701_c0_g1,TRINITY_DN107707_c0_g1,TRINITY_DN113408_c0_g1,TRINITY_DN11577_c0_g1,TRINITY_DN116721_c0_g1,TRINITY_DN116881_c0_g1,TRINITY_DN118773_c0_g1,TRINITY_DN12336_c0_g1,TRINITY_DN12676_c0_g1,TRINITY_DN13293_c0_g1,TRINITY_DN13640_c0_g1,TRINITY_DN13783_c0_g2,TRINITY_DN13961_c0_g1,TRINITY_DN15111_c…
BP	GO:0009206	purine ribonucleoside triphosphate biosynthetic process	12	83	95	296	0.00047	0.0192453	TRINITY_DN11387_c0_g1,TRINITY_DN11424_c0_g1,TRINITY_DN11424_c0_g2,TRINITY_DN15968_c0_g1,TRINITY_DN16711_c0_g1,TRINITY_DN18403_c0_g1,TRINITY_DN20713_c0_g1,TRINITY_DN4632_c0_g1,TRINITY_DN480_c0_g2,TRINITY_DN4978_c0_g1,TRINITY_DN61566_c0_g1,TRINITY_DN8791_c0_g1	TRINITY_DN100563_c0_g1,TRINITY_DN104775_c0_g1,TRINITY_DN10625_c0_g1,TRINITY_DN10761_c0_g1,TRINITY_DN107701_c0_g1,TRINITY_DN107707_c0_g1,TRINITY_DN113408_c0_g1,TRINITY_DN11577_c0_g1,TRINITY_DN116721_c0_g1,TRINITY_DN116881_c0_g1,TRINITY_DN118773_c0_g1,TRINITY_DN12336_c0_g1,TRINITY_DN12676_c0_g1,TRINITY_DN13293_c0_g1,TRINITY_DN13640_c0_g1,TRINITY_DN13783_c0_g2,TRINITY_DN13961_c0_g1,TRINITY_DN15111_c…
BP	GO:0016143	S-glycoside metabolic process	31	15	46	124	0.00049	0.0198036	TRINITY_DN10459_c0_g1,TRINITY_DN10508_c0_g1,TRINITY_DN109726_c0_g1,TRINITY_DN11008_c0_g1,TRINITY_DN11022_c0_g1,TRINITY_DN120433_c0_g1,TRINITY_DN13132_c0_g1,TRINITY_DN13593_c0_g1,TRINITY_DN13708_c1_g1,TRINITY_DN1438_c0_g2,TRINITY_DN15031_c0_g1,TRINITY_DN18384_c0_g2,TRINITY_DN1858_c0_g1,TRINITY_DN205_c0_g1,TRINITY_DN21826_c0_g1,TRINITY_DN22570_c0_g1,TRINITY_DN24575_c0_g1,TRINITY_DN3594_c0_g1,TRINIT…	TRINITY_DN10591_c0_g1,TRINITY_DN11293_c0_g1,TRINITY_DN17401_c0_g1,TRINITY_DN1981_c0_g1,TRINITY_DN22200_c0_g1,TRINITY_DN25231_c0_g1,TRINITY_DN25840_c0_g1,TRINITY_DN2601_c1_g1,TRINITY_DN3214_c0_g2,TRINITY_DN34567_c0_g1,TRINITY_DN34774_c0_g1,TRINITY_DN36200_c0_g1,TRINITY_DN3878_c0_g1,TRINITY_DN5432_c0_g1,TRINITY_DN8540_c0_g3
BP	GO:0019757	glycosinolate metabolic process	31	15	46	124	0.00049	0.0198036	TRINITY_DN10459_c0_g1,TRINITY_DN10508_c0_g1,TRINITY_DN109726_c0_g1,TRINITY_DN11008_c0_g1,TRINITY_DN11022_c0_g1,TRINITY_DN120433_c0_g1,TRINITY_DN13132_c0_g1,TRINITY_DN13593_c0_g1,TRINITY_DN13708_c1_g1,TRINITY_DN1438_c0_g2,TRINITY_DN15031_c0_g1,TRINITY_DN18384_c0_g2,TRINITY_DN1858_c0_g1,TRINITY_DN205_c0_g1,TRINITY_DN21826_c0_g1,TRINITY_DN22570_c0_g1,TRINITY_DN24575_c0_g1,TRINITY_DN3594_c0_g1,TRINIT…	TRINITY_DN10591_c0_g1,TRINITY_DN11293_c0_g1,TRINITY_DN17401_c0_g1,TRINITY_DN1981_c0_g1,TRINITY_DN22200_c0_g1,TRINITY_DN25231_c0_g1,TRINITY_DN25840_c0_g1,TRINITY_DN2601_c1_g1,TRINITY_DN3214_c0_g2,TRINITY_DN34567_c0_g1,TRINITY_DN34774_c0_g1,TRINITY_DN36200_c0_g1,TRINITY_DN3878_c0_g1,TRINITY_DN5432_c0_g1,TRINITY_DN8540_c0_g3
BP	GO:0019760	glucosinolate metabolic process	31	15	46	124	0.00049	0.0198036	TRINITY_DN10459_c0_g1,TRINITY_DN10508_c0_g1,TRINITY_DN109726_c0_g1,TRINITY_DN11008_c0_g1,TRINITY_DN11022_c0_g1,TRINITY_DN120433_c0_g1,TRINITY_DN13132_c0_g1,TRINITY_DN13593_c0_g1,TRINITY_DN13708_c1_g1,TRINITY_DN1438_c0_g2,TRINITY_DN15031_c0_g1,TRINITY_DN18384_c0_g2,TRINITY_DN1858_c0_g1,TRINITY_DN205_c0_g1,TRINITY_DN21826_c0_g1,TRINITY_DN22570_c0_g1,TRINITY_DN24575_c0_g1,TRINITY_DN3594_c0_g1,TRINIT…	TRINITY_DN10591_c0_g1,TRINITY_DN11293_c0_g1,TRINITY_DN17401_c0_g1,TRINITY_DN1981_c0_g1,TRINITY_DN22200_c0_g1,TRINITY_DN25231_c0_g1,TRINITY_DN25840_c0_g1,TRINITY_DN2601_c1_g1,TRINITY_DN3214_c0_g2,TRINITY_DN34567_c0_g1,TRINITY_DN34774_c0_g1,TRINITY_DN36200_c0_g1,TRINITY_DN3878_c0_g1,TRINITY_DN5432_c0_g1,TRINITY_DN8540_c0_g3
MF	GO:0016830	carbon-carbon lyase activity	19	43	62	176	0.0005	0.0201207	TRINITY_DN10866_c0_g1,TRINITY_DN112015_c0_g1,TRINITY_DN11417_c0_g2,TRINITY_DN11424_c0_g1,TRINITY_DN11424_c0_g2,TRINITY_DN11766_c0_g1,TRINITY_DN12224_c0_g1,TRINITY_DN14047_c0_g1,TRINITY_DN15968_c0_g1,TRINITY_DN17891_c0_g1,TRINITY_DN1906_c0_g1,TRINITY_DN3381_c0_g1,TRINITY_DN4148_c0_g1,TRINITY_DN6291_c0_g1,TRINITY_DN6528_c0_g1,TRINITY_DN7839_c0_g1,TRINITY_DN827_c0_g1,TRINITY_DN9634_c0_g1,TRINITY_DN9…	TRINITY_DN100563_c0_g1,TRINITY_DN10169_c0_g1,TRINITY_DN10425_c1_g1,TRINITY_DN106121_c0_g1,TRINITY_DN108669_c0_g1,TRINITY_DN11604_c0_g3,TRINITY_DN116881_c0_g1,TRINITY_DN119668_c0_g1,TRINITY_DN120882_c0_g1,TRINITY_DN12110_c0_g1,TRINITY_DN12356_c0_g1,TRINITY_DN15522_c1_g1,TRINITY_DN16476_c0_g1,TRINITY_DN16835_c0_g1,TRINITY_DN16894_c0_g1,TRINITY_DN17261_c0_g1,TRINITY_DN18044_c0_g1,TRINITY_DN18738_c0_…
BP	GO:0006536	glutamate metabolic process	6	21	27	63	0.00055	0.0220378	TRINITY_DN10563_c0_g1,TRINITY_DN10978_c0_g2,TRINITY_DN18933_c0_g1,TRINITY_DN23377_c0_g1,TRINITY_DN27891_c0_g1,TRINITY_DN78066_c0_g2	TRINITY_DN108003_c0_g1,TRINITY_DN11038_c0_g1,TRINITY_DN16227_c0_g1,TRINITY_DN19039_c0_g1,TRINITY_DN22759_c0_g1,TRINITY_DN23280_c0_g1,TRINITY_DN25167_c0_g1,TRINITY_DN25366_c0_g1,TRINITY_DN30952_c0_g2,TRINITY_DN31749_c0_g2,TRINITY_DN32440_c0_g1,TRINITY_DN34410_c0_g1,TRINITY_DN37587_c0_g3,TRINITY_DN51165_c0_g1,TRINITY_DN51165_c0_g2,TRINITY_DN5406_c0_g1,TRINITY_DN55503_c0_g3,TRINITY_DN612_c0_g1,TRINI…
BP	GO:0000447	endonucleolytic cleavage in ITS1 to separate SSU-rRNA from 5.8S rRNA and LSU-rRNA from tricistronic rRNA transcript (SSU-rRNA, 5.8S rRNA, LSU-rRNA)	0	20	20	42	0.00056	0.0222475	-	TRINITY_DN100883_c0_g1,TRINITY_DN112713_c0_g1,TRINITY_DN113861_c0_g1,TRINITY_DN116373_c0_g1,TRINITY_DN116671_c0_g1,TRINITY_DN117275_c0_g1,TRINITY_DN15359_c0_g1,TRINITY_DN16023_c0_g1,TRINITY_DN16518_c0_g1,TRINITY_DN23073_c0_g1,TRINITY_DN23073_c0_g2,TRINITY_DN23073_c1_g1,TRINITY_DN24828_c0_g1,TRINITY_DN26415_c0_g1,TRINITY_DN26612_c0_g1,TRINITY_DN29079_c0_g1,TRINITY_DN34864_c0_g1,TRINITY_DN45134_c0_…
BP	GO:0098656	anion transmembrane transport	53	78	131	430	0.00056	0.0222475	TRINITY_DN10775_c0_g1,TRINITY_DN10895_c0_g1,TRINITY_DN11262_c0_g1,TRINITY_DN11284_c0_g1,TRINITY_DN11284_c0_g2,TRINITY_DN11382_c0_g1,TRINITY_DN116356_c0_g1,TRINITY_DN11693_c0_g2,TRINITY_DN11704_c0_g2,TRINITY_DN13095_c0_g2,TRINITY_DN13151_c0_g1,TRINITY_DN13229_c0_g1,TRINITY_DN13916_c0_g1,TRINITY_DN14581_c0_g1,TRINITY_DN14920_c0_g1,TRINITY_DN1497_c0_g1,TRINITY_DN15716_c0_g1,TRINITY_DN1596_c0_g1,TRIN…	TRINITY_DN104516_c0_g1,TRINITY_DN108718_c0_g1,TRINITY_DN11791_c0_g1,TRINITY_DN120647_c0_g1,TRINITY_DN121060_c0_g1,TRINITY_DN12689_c0_g1,TRINITY_DN14337_c4_g1,TRINITY_DN14481_c0_g1,TRINITY_DN14689_c0_g1,TRINITY_DN15017_c0_g1,TRINITY_DN16032_c0_g1,TRINITY_DN16643_c0_g1,TRINITY_DN16684_c0_g1,TRINITY_DN16898_c0_g1,TRINITY_DN17007_c0_g1,TRINITY_DN17400_c0_g1,TRINITY_DN178_c1_g1,TRINITY_DN1802_c0_g1,TR…
BP	GO:0034614	cellular response to reactive oxygen species	6	31	37	95	0.00058	0.0229444	TRINITY_DN11050_c0_g1,TRINITY_DN13916_c0_g1,TRINITY_DN1858_c0_g1,TRINITY_DN2737_c0_g1,TRINITY_DN7489_c0_g1,TRINITY_DN8014_c2_g1	TRINITY_DN104775_c0_g1,TRINITY_DN113263_c0_g1,TRINITY_DN11383_c0_g1,TRINITY_DN11712_c0_g1,TRINITY_DN12766_c0_g1,TRINITY_DN12766_c0_g2,TRINITY_DN13144_c0_g2,TRINITY_DN13640_c0_g1,TRINITY_DN15624_c0_g1,TRINITY_DN15922_c0_g1,TRINITY_DN20031_c0_g1,TRINITY_DN20530_c0_g1,TRINITY_DN21708_c0_g1,TRINITY_DN2194_c0_g1,TRINITY_DN2329_c0_g1,TRINITY_DN24987_c0_g1,TRINITY_DN27506_c0_g1,TRINITY_DN27547_c0_g1,TRI…
CC	GO:0098807	chloroplast thylakoid membrane protein complex	11	5	16	31	0.00059	0.0232415	TRINITY_DN13120_c0_g1,TRINITY_DN19123_c0_g1,TRINITY_DN3751_c0_g1,TRINITY_DN4703_c1_g1,TRINITY_DN4978_c0_g1,TRINITY_DN56915_c0_g1,TRINITY_DN61566_c0_g1,TRINITY_DN6261_c0_g1,TRINITY_DN7923_c0_g1,TRINITY_DN8593_c0_g1,TRINITY_DN8854_c0_g1	TRINITY_DN20274_c0_g1,TRINITY_DN21156_c1_g1,TRINITY_DN25896_c0_g1,TRINITY_DN310_c0_g1,TRINITY_DN7987_c0_g1
BP	GO:0009642	response to light intensity	41	57	98	309	0.00061	0.0239284	TRINITY_DN10618_c0_g1,TRINITY_DN10681_c0_g1,TRINITY_DN10918_c0_g1,TRINITY_DN11160_c0_g1,TRINITY_DN11954_c0_g1,TRINITY_DN11988_c0_g1,TRINITY_DN12003_c0_g1,TRINITY_DN12679_c0_g1,TRINITY_DN1409_c0_g1,TRINITY_DN15097_c0_g1,TRINITY_DN15966_c0_g1,TRINITY_DN16609_c0_g1,TRINITY_DN19123_c0_g1,TRINITY_DN19975_c0_g1,TRINITY_DN25052_c0_g1,TRINITY_DN2651_c0_g1,TRINITY_DN2696_c0_g1,TRINITY_DN29861_c0_g1,TRINIT…	TRINITY_DN100343_c0_g1,TRINITY_DN100489_c0_g1,TRINITY_DN100955_c0_g1,TRINITY_DN103891_c0_g1,TRINITY_DN107924_c0_g1,TRINITY_DN108440_c0_g1,TRINITY_DN109069_c0_g1,TRINITY_DN10921_c0_g1,TRINITY_DN110319_c0_g1,TRINITY_DN11302_c0_g2,TRINITY_DN114211_c0_g1,TRINITY_DN11581_c0_g1,TRINITY_DN11623_c1_g1,TRINITY_DN12046_c0_g2,TRINITY_DN120925_c0_g1,TRINITY_DN12219_c0_g1,TRINITY_DN13381_c0_g3,TRINITY_DN15421…
BP	GO:0009413	response to flooding	4	5	9	13	0.00062	0.0242189	TRINITY_DN10603_c0_g2,TRINITY_DN1299_c2_g1,TRINITY_DN1299_c2_g2,TRINITY_DN817_c1_g2	TRINITY_DN23871_c0_g1,TRINITY_DN37587_c0_g3,TRINITY_DN55503_c0_g3,TRINITY_DN6117_c0_g1,TRINITY_DN7962_c0_g1
BP	GO:0045229	external encapsulating structure organization	76	138	214	747	0.00064	0.0247927	TRINITY_DN10195_c0_g1,TRINITY_DN10291_c0_g1,TRINITY_DN10427_c0_g1,TRINITY_DN10470_c0_g1,TRINITY_DN10864_c0_g1,TRINITY_DN10885_c0_g1,TRINITY_DN109104_c0_g1,TRINITY_DN11737_c0_g1,TRINITY_DN12294_c0_g1,TRINITY_DN1324_c0_g2,TRINITY_DN13359_c0_g1,TRINITY_DN1337_c0_g1,TRINITY_DN13597_c1_g1,TRINITY_DN13689_c0_g1,TRINITY_DN13840_c0_g1,TRINITY_DN14279_c0_g1,TRINITY_DN14532_c0_g1,TRINITY_DN14874_c0_g1,TRIN…	TRINITY_DN10012_c0_g1,TRINITY_DN100601_c0_g1,TRINITY_DN104775_c0_g1,TRINITY_DN111250_c0_g1,TRINITY_DN11190_c0_g1,TRINITY_DN111998_c0_g1,TRINITY_DN112560_c0_g1,TRINITY_DN112628_c0_g1,TRINITY_DN1131_c0_g1,TRINITY_DN11380_c0_g1,TRINITY_DN114391_c0_g1,TRINITY_DN11440_c0_g1,TRINITY_DN116862_c0_g1,TRINITY_DN1171_c0_g1,TRINITY_DN11768_c0_g1,TRINITY_DN1201_c0_g1,TRINITY_DN1201_c0_g3,TRINITY_DN12201_c0_g1…
BP	GO:0098542	defense response to other organism	123	276	399	1473	0.00064	0.0247927	TRINITY_DN10082_c0_g1,TRINITY_DN100869_c0_g1,TRINITY_DN1026_c0_g1,TRINITY_DN103505_c0_g1,TRINITY_DN10700_c0_g2,TRINITY_DN108313_c0_g1,TRINITY_DN109104_c0_g1,TRINITY_DN10975_c0_g1,TRINITY_DN10975_c0_g2,TRINITY_DN11022_c0_g1,TRINITY_DN1108_c0_g1,TRINITY_DN11090_c1_g1,TRINITY_DN112701_c0_g1,TRINITY_DN113401_c0_g1,TRINITY_DN11355_c0_g1,TRINITY_DN11417_c0_g2,TRINITY_DN116356_c0_g1,TRINITY_DN11701_c0_g…	TRINITY_DN100389_c0_g1,TRINITY_DN100951_c0_g1,TRINITY_DN101198_c0_g1,TRINITY_DN10159_c0_g1,TRINITY_DN101686_c0_g1,TRINITY_DN10217_c0_g1,TRINITY_DN102_c0_g4,TRINITY_DN102_c1_g1,TRINITY_DN103491_c0_g1,TRINITY_DN103925_c0_g1,TRINITY_DN104264_c0_g1,TRINITY_DN10460_c0_g1,TRINITY_DN104948_c0_g1,TRINITY_DN107883_c0_g1,TRINITY_DN10922_c0_g1,TRINITY_DN109511_c0_g1,TRINITY_DN1108_c0_g2,TRINITY_DN11137_c0_g…
BP	GO:0006812	cation transport	71	194	265	945	0.00065	0.025076	TRINITY_DN103517_c0_g1,TRINITY_DN10534_c0_g1,TRINITY_DN10918_c0_g1,TRINITY_DN11059_c0_g1,TRINITY_DN112480_c0_g1,TRINITY_DN11382_c0_g1,TRINITY_DN11387_c0_g1,TRINITY_DN11519_c0_g1,TRINITY_DN1179_c0_g2,TRINITY_DN11988_c0_g1,TRINITY_DN11997_c0_g1,TRINITY_DN120916_c0_g1,TRINITY_DN12200_c0_g2,TRINITY_DN122658_c0_g1,TRINITY_DN12484_c0_g1,TRINITY_DN12970_c0_g1,TRINITY_DN1299_c0_g2,TRINITY_DN13040_c0_g1,T…	TRINITY_DN101214_c0_g1,TRINITY_DN101674_c0_g1,TRINITY_DN10229_c0_g1,TRINITY_DN10368_c0_g1,TRINITY_DN1038_c0_g1,TRINITY_DN103925_c0_g1,TRINITY_DN104516_c0_g1,TRINITY_DN104775_c0_g1,TRINITY_DN104909_c0_g1,TRINITY_DN107701_c0_g1,TRINITY_DN11072_c0_g1,TRINITY_DN113365_c0_g1,TRINITY_DN113408_c0_g1,TRINITY_DN11499_c0_g1,TRINITY_DN11556_c0_g1,TRINITY_DN116465_c0_g1,TRINITY_DN1169_c0_g1,TRINITY_DN1169_c0…
BP	GO:0044364	disruption of cells of other organism	9	4	13	23	0.00068	0.0260184	TRINITY_DN103505_c0_g1,TRINITY_DN1108_c0_g1,TRINITY_DN13512_c0_g2,TRINITY_DN14521_c0_g1,TRINITY_DN15536_c0_g1,TRINITY_DN19225_c0_g1,TRINITY_DN21450_c0_g1,TRINITY_DN3246_c0_g1,TRINITY_DN4890_c0_g2	TRINITY_DN1108_c0_g2,TRINITY_DN13512_c0_g1,TRINITY_DN44556_c0_g1,TRINITY_DN83075_c0_g1
BP	GO:0071324	cellular response to disaccharide stimulus	5	8	13	23	0.00068	0.0260184	TRINITY_DN1339_c0_g1,TRINITY_DN1339_c0_g2,TRINITY_DN21012_c0_g1,TRINITY_DN8607_c0_g1,TRINITY_DN88908_c0_g1	TRINITY_DN121430_c0_g1,TRINITY_DN21585_c0_g1,TRINITY_DN28073_c0_g1,TRINITY_DN4164_c0_g2,TRINITY_DN4250_c0_g1,TRINITY_DN56896_c0_g1,TRINITY_DN71602_c0_g1,TRINITY_DN7418_c0_g1
MF	GO:0016682	oxidoreductase activity, acting on diphenols and related substances as donors, oxygen as acceptor	8	12	20	42	0.00071	0.0269454	TRINITY_DN12993_c0_g1,TRINITY_DN15409_c0_g1,TRINITY_DN26635_c0_g1,TRINITY_DN27179_c0_g1,TRINITY_DN27179_c0_g2,TRINITY_DN31702_c0_g1,TRINITY_DN4833_c0_g1,TRINITY_DN77585_c0_g1	TRINITY_DN14117_c0_g1,TRINITY_DN15019_c0_g1,TRINITY_DN15019_c0_g2,TRINITY_DN19812_c0_g1,TRINITY_DN27179_c0_g3,TRINITY_DN38071_c0_g1,TRINITY_DN4220_c0_g2,TRINITY_DN5006_c0_g1,TRINITY_DN8028_c0_g1,TRINITY_DN908_c0_g1,TRINITY_DN9346_c0_g1,TRINITY_DN9693_c0_g1
BP	GO:0019684	photosynthesis, light reaction	40	20	60	174	0.00071	0.0269454	TRINITY_DN10618_c0_g1,TRINITY_DN10681_c0_g1,TRINITY_DN10840_c0_g1,TRINITY_DN11080_c1_g1,TRINITY_DN112393_c0_g1,TRINITY_DN11954_c0_g1,TRINITY_DN12003_c0_g1,TRINITY_DN121857_c0_g1,TRINITY_DN14201_c0_g1,TRINITY_DN15654_c0_g1,TRINITY_DN15733_c0_g1,TRINITY_DN17478_c0_g1,TRINITY_DN18258_c0_g2,TRINITY_DN18838_c0_g4,TRINITY_DN19123_c0_g1,TRINITY_DN20636_c0_g1,TRINITY_DN25052_c0_g1,TRINITY_DN2651_c0_g1,TR…	TRINITY_DN100955_c0_g1,TRINITY_DN12219_c0_g1,TRINITY_DN13381_c0_g3,TRINITY_DN17802_c0_g1,TRINITY_DN18141_c0_g1,TRINITY_DN19489_c0_g1,TRINITY_DN19489_c0_g2,TRINITY_DN20274_c0_g1,TRINITY_DN21156_c1_g1,TRINITY_DN25349_c0_g3,TRINITY_DN25896_c0_g1,TRINITY_DN27039_c0_g1,TRINITY_DN37071_c0_g1,TRINITY_DN45525_c0_g1,TRINITY_DN5514_c0_g1,TRINITY_DN7987_c0_g1,TRINITY_DN8254_c0_g1,TRINITY_DN9726_c0_g1,TRINIT…
BP	GO:0044272	sulfur compound biosynthetic process	29	76	105	336	0.00072	0.0271045	TRINITY_DN10508_c0_g1,TRINITY_DN11008_c0_g1,TRINITY_DN11617_c0_g1,TRINITY_DN120433_c0_g1,TRINITY_DN13132_c0_g1,TRINITY_DN13593_c0_g1,TRINITY_DN15252_c0_g1,TRINITY_DN18384_c0_g2,TRINITY_DN1858_c0_g1,TRINITY_DN205_c0_g1,TRINITY_DN20717_c0_g2,TRINITY_DN21826_c0_g1,TRINITY_DN22570_c0_g1,TRINITY_DN3594_c0_g1,TRINITY_DN3666_c0_g1,TRINITY_DN3719_c0_g1,TRINITY_DN3797_c0_g2,TRINITY_DN3802_c0_g1,TRINITY_DN…	TRINITY_DN10425_c1_g1,TRINITY_DN10591_c0_g1,TRINITY_DN107707_c0_g1,TRINITY_DN109551_c0_g1,TRINITY_DN11293_c0_g1,TRINITY_DN1169_c0_g1,TRINITY_DN1169_c0_g2,TRINITY_DN11872_c0_g1,TRINITY_DN11872_c0_g2,TRINITY_DN12037_c0_g1,TRINITY_DN120882_c0_g1,TRINITY_DN13257_c0_g1,TRINITY_DN13783_c0_g2,TRINITY_DN14212_c0_g1,TRINITY_DN18242_c0_g1,TRINITY_DN18738_c0_g1,TRINITY_DN19016_c0_g1,TRINITY_DN19678_c0_g1,TR…
BP	GO:0080167	response to karrikin	25	26	51	143	0.00072	0.0271045	TRINITY_DN10618_c0_g1,TRINITY_DN12303_c0_g1,TRINITY_DN13120_c0_g1,TRINITY_DN13471_c0_g1,TRINITY_DN14702_c0_g1,TRINITY_DN16051_c0_g1,TRINITY_DN168_c1_g1,TRINITY_DN1858_c0_g1,TRINITY_DN20298_c0_g1,TRINITY_DN2465_c0_g1,TRINITY_DN2610_c0_g1,TRINITY_DN2737_c0_g1,TRINITY_DN3381_c0_g1,TRINITY_DN37253_c0_g1,TRINITY_DN4110_c0_g1,TRINITY_DN495_c0_g1,TRINITY_DN5010_c0_g1,TRINITY_DN51826_c0_g1,TRINITY_DN7839…	TRINITY_DN12000_c0_g2,TRINITY_DN122009_c0_g1,TRINITY_DN122727_c0_g1,TRINITY_DN1352_c0_g1,TRINITY_DN16476_c0_g1,TRINITY_DN1701_c0_g1,TRINITY_DN18720_c0_g1,TRINITY_DN18903_c0_g1,TRINITY_DN19508_c0_g2,TRINITY_DN19812_c0_g1,TRINITY_DN2186_c0_g1,TRINITY_DN26786_c0_g1,TRINITY_DN2775_c0_g1,TRINITY_DN2938_c0_g1,TRINITY_DN309_c0_g1,TRINITY_DN3601_c0_g1,TRINITY_DN40811_c0_g1,TRINITY_DN421_c0_g2,TRINITY_DN4…
BP	GO:0030644	cellular chloride ion homeostasis	0	5	5	5	0.00073	0.0273706	-	TRINITY_DN100489_c0_g1,TRINITY_DN103891_c0_g1,TRINITY_DN107924_c0_g1,TRINITY_DN17815_c0_g1,TRINITY_DN36426_c0_g1
BP	GO:0009739	response to gibberellin	36	35	71	213	0.00074	0.0276346	TRINITY_DN10301_c0_g1,TRINITY_DN10422_c0_g1,TRINITY_DN10462_c0_g1,TRINITY_DN10979_c0_g1,TRINITY_DN113081_c0_g1,TRINITY_DN11841_c0_g1,TRINITY_DN11938_c0_g1,TRINITY_DN12030_c0_g1,TRINITY_DN12601_c0_g1,TRINITY_DN13708_c1_g1,TRINITY_DN13924_c2_g1,TRINITY_DN14351_c0_g1,TRINITY_DN14617_c0_g1,TRINITY_DN16035_c0_g2,TRINITY_DN17540_c0_g1,TRINITY_DN1903_c0_g1,TRINITY_DN19360_c0_g1,TRINITY_DN19942_c0_g1,TRI…	TRINITY_DN105270_c0_g1,TRINITY_DN10591_c0_g1,TRINITY_DN10596_c0_g1,TRINITY_DN11302_c0_g2,TRINITY_DN11356_c0_g1,TRINITY_DN115350_c0_g1,TRINITY_DN12328_c0_g1,TRINITY_DN13588_c0_g1,TRINITY_DN16146_c0_g1,TRINITY_DN17270_c0_g1,TRINITY_DN18138_c0_g1,TRINITY_DN18460_c0_g2,TRINITY_DN18956_c0_g2,TRINITY_DN21242_c0_g1,TRINITY_DN23773_c0_g1,TRINITY_DN25231_c0_g1,TRINITY_DN25820_c0_g1,TRINITY_DN26638_c0_g6,T…
MF	GO:0008234	cysteine-type peptidase activity	7	76	83	252	0.00076	0.0282684	TRINITY_DN105495_c0_g1,TRINITY_DN14214_c0_g1,TRINITY_DN14214_c0_g2,TRINITY_DN4561_c0_g2,TRINITY_DN66081_c0_g2,TRINITY_DN669_c1_g1,TRINITY_DN6756_c0_g1	TRINITY_DN100951_c0_g1,TRINITY_DN103536_c0_g1,TRINITY_DN103565_c0_g1,TRINITY_DN104876_c0_g1,TRINITY_DN108816_c0_g1,TRINITY_DN10939_c0_g1,TRINITY_DN112199_c0_g1,TRINITY_DN112390_c0_g1,TRINITY_DN112443_c0_g1,TRINITY_DN113152_c0_g1,TRINITY_DN113263_c0_g1,TRINITY_DN114491_c0_g1,TRINITY_DN116216_c0_g1,TRINITY_DN11712_c0_g1,TRINITY_DN11975_c0_g1,TRINITY_DN121696_c0_g1,TRINITY_DN123395_c0_g1,TRINITY_DN1…
BP	GO:0009127	purine nucleoside monophosphate biosynthetic process	17	84	101	322	0.00078	0.0287829	TRINITY_DN11387_c0_g1,TRINITY_DN11424_c0_g1,TRINITY_DN11424_c0_g2,TRINITY_DN12595_c0_g1,TRINITY_DN15968_c0_g1,TRINITY_DN16711_c0_g1,TRINITY_DN18403_c0_g1,TRINITY_DN20713_c0_g1,TRINITY_DN3274_c0_g1,TRINITY_DN4133_c0_g1,TRINITY_DN4632_c0_g1,TRINITY_DN480_c0_g2,TRINITY_DN4978_c0_g1,TRINITY_DN5076_c0_g1,TRINITY_DN5414_c0_g1,TRINITY_DN61566_c0_g1,TRINITY_DN8791_c0_g1	TRINITY_DN100563_c0_g1,TRINITY_DN104775_c0_g1,TRINITY_DN10761_c0_g1,TRINITY_DN107701_c0_g1,TRINITY_DN107707_c0_g1,TRINITY_DN109180_c0_g1,TRINITY_DN113408_c0_g1,TRINITY_DN11577_c0_g1,TRINITY_DN116721_c0_g1,TRINITY_DN116881_c0_g1,TRINITY_DN118773_c0_g1,TRINITY_DN12336_c0_g1,TRINITY_DN12676_c0_g1,TRINITY_DN13293_c0_g1,TRINITY_DN13640_c0_g1,TRINITY_DN13783_c0_g2,TRINITY_DN15111_c0_g1,TRINITY_DN15900_…
BP	GO:0009168	purine ribonucleoside monophosphate biosynthetic process	17	84	101	322	0.00078	0.0287829	TRINITY_DN11387_c0_g1,TRINITY_DN11424_c0_g1,TRINITY_DN11424_c0_g2,TRINITY_DN12595_c0_g1,TRINITY_DN15968_c0_g1,TRINITY_DN16711_c0_g1,TRINITY_DN18403_c0_g1,TRINITY_DN20713_c0_g1,TRINITY_DN3274_c0_g1,TRINITY_DN4133_c0_g1,TRINITY_DN4632_c0_g1,TRINITY_DN480_c0_g2,TRINITY_DN4978_c0_g1,TRINITY_DN5076_c0_g1,TRINITY_DN5414_c0_g1,TRINITY_DN61566_c0_g1,TRINITY_DN8791_c0_g1	TRINITY_DN100563_c0_g1,TRINITY_DN104775_c0_g1,TRINITY_DN10761_c0_g1,TRINITY_DN107701_c0_g1,TRINITY_DN107707_c0_g1,TRINITY_DN109180_c0_g1,TRINITY_DN113408_c0_g1,TRINITY_DN11577_c0_g1,TRINITY_DN116721_c0_g1,TRINITY_DN116881_c0_g1,TRINITY_DN118773_c0_g1,TRINITY_DN12336_c0_g1,TRINITY_DN12676_c0_g1,TRINITY_DN13293_c0_g1,TRINITY_DN13640_c0_g1,TRINITY_DN13783_c0_g2,TRINITY_DN15111_c0_g1,TRINITY_DN15900_…
MF	GO:0033907	beta-D-fucosidase activity	3	2	5	5	0.00079	0.0289233	TRINITY_DN15944_c0_g1,TRINITY_DN6970_c0_g1,TRINITY_DN90251_c0_g1	TRINITY_DN17401_c0_g1,TRINITY_DN27506_c0_g3
MF	GO:0047701	beta-L-arabinosidase activity	3	2	5	5	0.00079	0.0289233	TRINITY_DN15944_c0_g1,TRINITY_DN6970_c0_g1,TRINITY_DN90251_c0_g1	TRINITY_DN17401_c0_g1,TRINITY_DN27506_c0_g3
BP	GO:0015849	organic acid transport	28	49	77	235	0.0008	0.0290615	TRINITY_DN10895_c0_g1,TRINITY_DN11284_c0_g1,TRINITY_DN11284_c0_g2,TRINITY_DN11382_c0_g1,TRINITY_DN11693_c0_g2,TRINITY_DN13916_c0_g1,TRINITY_DN14569_c0_g1,TRINITY_DN14581_c0_g1,TRINITY_DN1596_c0_g1,TRINITY_DN16193_c0_g1,TRINITY_DN16193_c1_g1,TRINITY_DN16193_c1_g2,TRINITY_DN16702_c0_g1,TRINITY_DN16974_c0_g1,TRINITY_DN2112_c0_g1,TRINITY_DN21278_c0_g1,TRINITY_DN22607_c0_g1,TRINITY_DN22826_c0_g1,TRINI…	TRINITY_DN100493_c0_g1,TRINITY_DN104516_c0_g1,TRINITY_DN11791_c0_g1,TRINITY_DN121060_c0_g1,TRINITY_DN123064_c0_g1,TRINITY_DN14689_c0_g1,TRINITY_DN15017_c0_g1,TRINITY_DN16032_c0_g1,TRINITY_DN17400_c0_g1,TRINITY_DN18201_c0_g1,TRINITY_DN18296_c0_g1,TRINITY_DN18646_c0_g1,TRINITY_DN21419_c0_g1,TRINITY_DN2194_c0_g1,TRINITY_DN22976_c0_g1,TRINITY_DN23436_c0_g1,TRINITY_DN24070_c0_g1,TRINITY_DN24110_c0_g1,…
BP	GO:0046942	carboxylic acid transport	28	49	77	235	0.0008	0.0290615	TRINITY_DN10895_c0_g1,TRINITY_DN11284_c0_g1,TRINITY_DN11284_c0_g2,TRINITY_DN11382_c0_g1,TRINITY_DN11693_c0_g2,TRINITY_DN13916_c0_g1,TRINITY_DN14569_c0_g1,TRINITY_DN14581_c0_g1,TRINITY_DN1596_c0_g1,TRINITY_DN16193_c0_g1,TRINITY_DN16193_c1_g1,TRINITY_DN16193_c1_g2,TRINITY_DN16702_c0_g1,TRINITY_DN16974_c0_g1,TRINITY_DN2112_c0_g1,TRINITY_DN21278_c0_g1,TRINITY_DN22607_c0_g1,TRINITY_DN22826_c0_g1,TRINI…	TRINITY_DN100493_c0_g1,TRINITY_DN104516_c0_g1,TRINITY_DN11791_c0_g1,TRINITY_DN121060_c0_g1,TRINITY_DN123064_c0_g1,TRINITY_DN14689_c0_g1,TRINITY_DN15017_c0_g1,TRINITY_DN16032_c0_g1,TRINITY_DN17400_c0_g1,TRINITY_DN18201_c0_g1,TRINITY_DN18296_c0_g1,TRINITY_DN18646_c0_g1,TRINITY_DN21419_c0_g1,TRINITY_DN2194_c0_g1,TRINITY_DN22976_c0_g1,TRINITY_DN23436_c0_g1,TRINITY_DN24070_c0_g1,TRINITY_DN24110_c0_g1,…
CC	GO:0005788	endoplasmic reticulum lumen	1	53	54	155	0.00081	0.0293107	TRINITY_DN1174_c2_g1	TRINITY_DN100955_c0_g1,TRINITY_DN101548_c0_g1,TRINITY_DN104493_c0_g1,TRINITY_DN10949_c0_g1,TRINITY_DN112786_c0_g1,TRINITY_DN121815_c0_g1,TRINITY_DN12219_c0_g1,TRINITY_DN13072_c0_g2,TRINITY_DN13358_c1_g1,TRINITY_DN13381_c0_g1,TRINITY_DN13381_c0_g3,TRINITY_DN13603_c0_g1,TRINITY_DN14502_c0_g1,TRINITY_DN14502_c0_g2,TRINITY_DN14502_c1_g1,TRINITY_DN14502_c1_g2,TRINITY_DN15129_c0_g3,TRINITY_DN15292_c0_g…
BP	GO:0042742	defense response to bacterium	59	150	209	731	0.00082	0.029558	TRINITY_DN100869_c0_g1,TRINITY_DN1026_c0_g1,TRINITY_DN108313_c0_g1,TRINITY_DN109104_c0_g1,TRINITY_DN11090_c1_g1,TRINITY_DN113401_c0_g1,TRINITY_DN11701_c0_g1,TRINITY_DN12277_c0_g1,TRINITY_DN13254_c0_g1,TRINITY_DN13512_c0_g2,TRINITY_DN13528_c0_g1,TRINITY_DN1409_c0_g1,TRINITY_DN15006_c0_g5,TRINITY_DN15536_c0_g1,TRINITY_DN1570_c0_g2,TRINITY_DN17030_c0_g1,TRINITY_DN173_c2_g1,TRINITY_DN1742_c0_g1,TRINI…	TRINITY_DN101198_c0_g1,TRINITY_DN10159_c0_g1,TRINITY_DN102_c1_g1,TRINITY_DN10460_c0_g1,TRINITY_DN10922_c0_g1,TRINITY_DN109511_c0_g1,TRINITY_DN11402_c0_g1,TRINITY_DN116459_c0_g1,TRINITY_DN116937_c0_g1,TRINITY_DN11707_c0_g1,TRINITY_DN11783_c0_g1,TRINITY_DN120925_c0_g1,TRINITY_DN121680_c0_g1,TRINITY_DN12479_c0_g1,TRINITY_DN12490_c0_g1,TRINITY_DN12766_c0_g1,TRINITY_DN12766_c0_g2,TRINITY_DN1280_c3_g1,…
BP	GO:1903825	organic acid transmembrane transport	25	37	62	182	0.00083	0.0296892	TRINITY_DN10895_c0_g1,TRINITY_DN11284_c0_g1,TRINITY_DN11284_c0_g2,TRINITY_DN11382_c0_g1,TRINITY_DN11693_c0_g2,TRINITY_DN13916_c0_g1,TRINITY_DN14581_c0_g1,TRINITY_DN1596_c0_g1,TRINITY_DN16193_c0_g1,TRINITY_DN16193_c1_g1,TRINITY_DN16193_c1_g2,TRINITY_DN16702_c0_g1,TRINITY_DN16974_c0_g1,TRINITY_DN2112_c0_g1,TRINITY_DN22607_c0_g1,TRINITY_DN22826_c0_g1,TRINITY_DN2696_c0_g1,TRINITY_DN28447_c0_g1,TRINIT…	TRINITY_DN104516_c0_g1,TRINITY_DN11791_c0_g1,TRINITY_DN121060_c0_g1,TRINITY_DN14689_c0_g1,TRINITY_DN15017_c0_g1,TRINITY_DN16032_c0_g1,TRINITY_DN17400_c0_g1,TRINITY_DN18201_c0_g1,TRINITY_DN18296_c0_g1,TRINITY_DN18646_c0_g1,TRINITY_DN21419_c0_g1,TRINITY_DN23436_c0_g1,TRINITY_DN24070_c0_g1,TRINITY_DN24110_c0_g1,TRINITY_DN24603_c0_g1,TRINITY_DN2469_c0_g1,TRINITY_DN26003_c0_g1,TRINITY_DN28419_c0_g1,TR…
BP	GO:1905039	carboxylic acid transmembrane transport	25	37	62	182	0.00083	0.0296892	TRINITY_DN10895_c0_g1,TRINITY_DN11284_c0_g1,TRINITY_DN11284_c0_g2,TRINITY_DN11382_c0_g1,TRINITY_DN11693_c0_g2,TRINITY_DN13916_c0_g1,TRINITY_DN14581_c0_g1,TRINITY_DN1596_c0_g1,TRINITY_DN16193_c0_g1,TRINITY_DN16193_c1_g1,TRINITY_DN16193_c1_g2,TRINITY_DN16702_c0_g1,TRINITY_DN16974_c0_g1,TRINITY_DN2112_c0_g1,TRINITY_DN22607_c0_g1,TRINITY_DN22826_c0_g1,TRINITY_DN2696_c0_g1,TRINITY_DN28447_c0_g1,TRINIT…	TRINITY_DN104516_c0_g1,TRINITY_DN11791_c0_g1,TRINITY_DN121060_c0_g1,TRINITY_DN14689_c0_g1,TRINITY_DN15017_c0_g1,TRINITY_DN16032_c0_g1,TRINITY_DN17400_c0_g1,TRINITY_DN18201_c0_g1,TRINITY_DN18296_c0_g1,TRINITY_DN18646_c0_g1,TRINITY_DN21419_c0_g1,TRINITY_DN23436_c0_g1,TRINITY_DN24070_c0_g1,TRINITY_DN24110_c0_g1,TRINITY_DN24603_c0_g1,TRINITY_DN2469_c0_g1,TRINITY_DN26003_c0_g1,TRINITY_DN28419_c0_g1,TR…
BP	GO:0098662	inorganic cation transmembrane transport	49	154	203	709	0.00089	0.0317139	TRINITY_DN103517_c0_g1,TRINITY_DN10918_c0_g1,TRINITY_DN11059_c0_g1,TRINITY_DN112480_c0_g1,TRINITY_DN11387_c0_g1,TRINITY_DN11519_c0_g1,TRINITY_DN1179_c0_g2,TRINITY_DN11988_c0_g1,TRINITY_DN11997_c0_g1,TRINITY_DN120916_c0_g1,TRINITY_DN12200_c0_g2,TRINITY_DN122658_c0_g1,TRINITY_DN12484_c0_g1,TRINITY_DN12970_c0_g1,TRINITY_DN1299_c0_g2,TRINITY_DN13151_c0_g1,TRINITY_DN1546_c2_g1,TRINITY_DN1578_c0_g1,TRI…	TRINITY_DN101214_c0_g1,TRINITY_DN101674_c0_g1,TRINITY_DN10368_c0_g1,TRINITY_DN1038_c0_g1,TRINITY_DN103925_c0_g1,TRINITY_DN104516_c0_g1,TRINITY_DN104909_c0_g1,TRINITY_DN107701_c0_g1,TRINITY_DN11072_c0_g1,TRINITY_DN113365_c0_g1,TRINITY_DN113408_c0_g1,TRINITY_DN11499_c0_g1,TRINITY_DN11556_c0_g1,TRINITY_DN116465_c0_g1,TRINITY_DN1169_c0_g1,TRINITY_DN1169_c0_g2,TRINITY_DN117598_c0_g1,TRINITY_DN117742_c…
BP	GO:0046677	response to antibiotic	62	117	179	617	0.00091	0.0321809	TRINITY_DN1026_c0_g1,TRINITY_DN10301_c0_g1,TRINITY_DN103968_c0_g1,TRINITY_DN10422_c0_g1,TRINITY_DN10917_c0_g1,TRINITY_DN11050_c0_g1,TRINITY_DN113401_c0_g1,TRINITY_DN11355_c0_g1,TRINITY_DN1171_c1_g1,TRINITY_DN11841_c0_g1,TRINITY_DN12125_c0_g1,TRINITY_DN13528_c0_g1,TRINITY_DN13924_c2_g1,TRINITY_DN1409_c0_g1,TRINITY_DN15097_c0_g1,TRINITY_DN15897_c0_g1,TRINITY_DN15944_c0_g1,TRINITY_DN15963_c0_g1,TRIN…	TRINITY_DN103491_c0_g1,TRINITY_DN10436_c0_g1,TRINITY_DN104775_c0_g1,TRINITY_DN108440_c0_g1,TRINITY_DN10921_c0_g1,TRINITY_DN11148_c0_g1,TRINITY_DN113263_c0_g1,TRINITY_DN11383_c0_g1,TRINITY_DN115350_c0_g1,TRINITY_DN11712_c0_g1,TRINITY_DN11975_c0_g1,TRINITY_DN11989_c0_g2,TRINITY_DN120925_c0_g1,TRINITY_DN12766_c0_g1,TRINITY_DN12766_c0_g2,TRINITY_DN13640_c0_g1,TRINITY_DN13994_c0_g1,TRINITY_DN14649_c0_…
BP	GO:0030007	cellular potassium ion homeostasis	2	5	7	9	0.00091	0.0321809	TRINITY_DN24472_c0_g1,TRINITY_DN24472_c0_g2	TRINITY_DN15272_c0_g1,TRINITY_DN19936_c1_g1,TRINITY_DN37777_c0_g1,TRINITY_DN37777_c0_g2,TRINITY_DN6009_c1_g1
BP	GO:0071332	cellular response to fructose stimulus	4	2	6	7	0.00095	0.0334687	TRINITY_DN1339_c0_g1,TRINITY_DN1339_c0_g2,TRINITY_DN21012_c0_g1,TRINITY_DN88908_c0_g1	TRINITY_DN121430_c0_g1,TRINITY_DN56896_c0_g1
BP	GO:0051187	cofactor catabolic process	25	33	58	169	0.00098	0.0343958	TRINITY_DN10074_c0_g1,TRINITY_DN108313_c0_g1,TRINITY_DN12665_c0_g1,TRINITY_DN13359_c0_g1,TRINITY_DN13689_c0_g1,TRINITY_DN15424_c0_g1,TRINITY_DN15640_c0_g1,TRINITY_DN17582_c0_g1,TRINITY_DN19717_c0_g1,TRINITY_DN20174_c0_g1,TRINITY_DN22118_c0_g1,TRINITY_DN2401_c0_g2,TRINITY_DN2401_c0_g3,TRINITY_DN3060_c0_g4,TRINITY_DN4288_c0_g2,TRINITY_DN4603_c0_g1,TRINITY_DN5620_c1_g1,TRINITY_DN5661_c0_g1,TRINITY_D…	TRINITY_DN10831_c0_g1,TRINITY_DN11190_c0_g1,TRINITY_DN111993_c0_g1,TRINITY_DN114363_c0_g1,TRINITY_DN1201_c0_g1,TRINITY_DN1201_c0_g3,TRINITY_DN12491_c0_g1,TRINITY_DN14280_c0_g1,TRINITY_DN14280_c1_g1,TRINITY_DN14336_c1_g1,TRINITY_DN14336_c1_g2,TRINITY_DN14486_c0_g1,TRINITY_DN20098_c0_g1,TRINITY_DN21933_c0_g2,TRINITY_DN2401_c0_g1,TRINITY_DN27862_c0_g2,TRINITY_DN36505_c0_g1,TRINITY_DN41669_c0_g1,TRIN…
MF	GO:0080083	beta-gentiobiose beta-glucosidase activity	4	3	7	9	0.00102	0.0356656	TRINITY_DN15944_c0_g1,TRINITY_DN1940_c0_g1,TRINITY_DN6970_c0_g1,TRINITY_DN90251_c0_g1	TRINITY_DN17401_c0_g1,TRINITY_DN27506_c0_g3,TRINITY_DN29497_c0_g3
BP	GO:0009142	nucleoside triphosphate biosynthetic process	13	87	100	321	0.00106	0.036926	TRINITY_DN11387_c0_g1,TRINITY_DN11424_c0_g1,TRINITY_DN11424_c0_g2,TRINITY_DN15968_c0_g1,TRINITY_DN16711_c0_g1,TRINITY_DN16989_c0_g1,TRINITY_DN18403_c0_g1,TRINITY_DN20713_c0_g1,TRINITY_DN4632_c0_g1,TRINITY_DN480_c0_g2,TRINITY_DN4978_c0_g1,TRINITY_DN61566_c0_g1,TRINITY_DN8791_c0_g1	TRINITY_DN100563_c0_g1,TRINITY_DN104775_c0_g1,TRINITY_DN10625_c0_g1,TRINITY_DN10761_c0_g1,TRINITY_DN107701_c0_g1,TRINITY_DN107707_c0_g1,TRINITY_DN113408_c0_g1,TRINITY_DN11577_c0_g1,TRINITY_DN116721_c0_g1,TRINITY_DN116881_c0_g1,TRINITY_DN118773_c0_g1,TRINITY_DN12336_c0_g1,TRINITY_DN12676_c0_g1,TRINITY_DN13293_c0_g1,TRINITY_DN13640_c0_g1,TRINITY_DN13783_c0_g2,TRINITY_DN13961_c0_g1,TRINITY_DN15111_c…
BP	GO:0055083	monovalent inorganic anion homeostasis	5	13	18	38	0.00112	0.0388711	TRINITY_DN10301_c0_g1,TRINITY_DN109967_c0_g1,TRINITY_DN4034_c0_g1,TRINITY_DN6607_c0_g1,TRINITY_DN6652_c0_g1	TRINITY_DN100489_c0_g1,TRINITY_DN103891_c0_g1,TRINITY_DN107924_c0_g1,TRINITY_DN17815_c0_g1,TRINITY_DN1802_c0_g1,TRINITY_DN22301_c0_g1,TRINITY_DN36426_c0_g1,TRINITY_DN44362_c0_g1,TRINITY_DN4615_c0_g1,TRINITY_DN51551_c0_g1,TRINITY_DN58432_c0_g1,TRINITY_DN5845_c0_g1,TRINITY_DN97745_c0_g2
MF	GO:0004108	citrate (Si)-synthase activity	1	9	10	16	0.00116	0.0398153	TRINITY_DN690_c0_g2	TRINITY_DN13957_c1_g1,TRINITY_DN20422_c0_g1,TRINITY_DN24280_c0_g1,TRINITY_DN32455_c0_g1,TRINITY_DN40935_c0_g1,TRINITY_DN46758_c0_g1,TRINITY_DN68325_c0_g1,TRINITY_DN6993_c0_g1,TRINITY_DN81281_c0_g2
MF	GO:0005381	iron ion transmembrane transporter activity	2	8	10	16	0.00116	0.0398153	TRINITY_DN10918_c0_g1,TRINITY_DN605_c0_g1	TRINITY_DN12785_c0_g1,TRINITY_DN12785_c0_g2,TRINITY_DN21708_c0_g1,TRINITY_DN3091_c0_g1,TRINITY_DN58398_c0_g2,TRINITY_DN642_c0_g1,TRINITY_DN9186_c0_g1,TRINITY_DN953_c0_g1
MF	GO:0036440	citrate synthase activity	1	9	10	16	0.00116	0.0398153	TRINITY_DN690_c0_g2	TRINITY_DN13957_c1_g1,TRINITY_DN20422_c0_g1,TRINITY_DN24280_c0_g1,TRINITY_DN32455_c0_g1,TRINITY_DN40935_c0_g1,TRINITY_DN46758_c0_g1,TRINITY_DN68325_c0_g1,TRINITY_DN6993_c0_g1,TRINITY_DN81281_c0_g2
MF	GO:0004553	hydrolase activity, hydrolyzing O-glycosyl compounds	63	63	126	412	0.0012	0.0410374	TRINITY_DN10291_c0_g1,TRINITY_DN10459_c0_g1,TRINITY_DN10864_c0_g1,TRINITY_DN10885_c0_g1,TRINITY_DN11419_c0_g1,TRINITY_DN11737_c0_g1,TRINITY_DN11938_c0_g1,TRINITY_DN121664_c0_g1,TRINITY_DN12357_c0_g1,TRINITY_DN1324_c0_g2,TRINITY_DN1339_c0_g1,TRINITY_DN1339_c0_g2,TRINITY_DN1442_c0_g1,TRINITY_DN1481_c0_g1,TRINITY_DN15614_c0_g1,TRINITY_DN1587_c0_g1,TRINITY_DN15944_c0_g1,TRINITY_DN16464_c0_g1,TRINITY_…	TRINITY_DN105270_c0_g1,TRINITY_DN109483_c0_g1,TRINITY_DN11252_c0_g1,TRINITY_DN112694_c0_g1,TRINITY_DN11380_c0_g1,TRINITY_DN114391_c0_g1,TRINITY_DN11440_c0_g1,TRINITY_DN121430_c0_g1,TRINITY_DN12806_c0_g1,TRINITY_DN13230_c0_g2,TRINITY_DN13853_c0_g2,TRINITY_DN13909_c0_g1,TRINITY_DN14495_c0_g1,TRINITY_DN1553_c0_g1,TRINITY_DN16252_c0_g1,TRINITY_DN17401_c0_g1,TRINITY_DN18920_c0_g5,TRINITY_DN19784_c0_g1…
BP	GO:0009132	nucleoside diphosphate metabolic process	8	60	68	206	0.00125	0.0425912	TRINITY_DN11424_c0_g1,TRINITY_DN11424_c0_g2,TRINITY_DN15968_c0_g1,TRINITY_DN16711_c0_g1,TRINITY_DN18403_c0_g1,TRINITY_DN20713_c0_g1,TRINITY_DN480_c0_g2,TRINITY_DN8791_c0_g1	TRINITY_DN100563_c0_g1,TRINITY_DN104775_c0_g1,TRINITY_DN10625_c0_g1,TRINITY_DN10761_c0_g1,TRINITY_DN107707_c0_g1,TRINITY_DN11577_c0_g1,TRINITY_DN116721_c0_g1,TRINITY_DN116881_c0_g1,TRINITY_DN118773_c0_g1,TRINITY_DN13293_c0_g1,TRINITY_DN13640_c0_g1,TRINITY_DN13783_c0_g2,TRINITY_DN13961_c0_g1,TRINITY_DN15111_c0_g1,TRINITY_DN1637_c0_g1,TRINITY_DN16476_c0_g1,TRINITY_DN17334_c1_g1,TRINITY_DN18919_c0_g…
BP	GO:0071555	cell wall organization	75	126	201	706	0.00127	0.0429591	TRINITY_DN10195_c0_g1,TRINITY_DN10291_c0_g1,TRINITY_DN10427_c0_g1,TRINITY_DN10470_c0_g1,TRINITY_DN10864_c0_g1,TRINITY_DN10885_c0_g1,TRINITY_DN109104_c0_g1,TRINITY_DN11737_c0_g1,TRINITY_DN12294_c0_g1,TRINITY_DN1324_c0_g2,TRINITY_DN13359_c0_g1,TRINITY_DN1337_c0_g1,TRINITY_DN13597_c1_g1,TRINITY_DN13689_c0_g1,TRINITY_DN13840_c0_g1,TRINITY_DN14279_c0_g1,TRINITY_DN14532_c0_g1,TRINITY_DN15424_c0_g1,TRIN…	TRINITY_DN10012_c0_g1,TRINITY_DN100601_c0_g1,TRINITY_DN104775_c0_g1,TRINITY_DN111250_c0_g1,TRINITY_DN11190_c0_g1,TRINITY_DN111998_c0_g1,TRINITY_DN112560_c0_g1,TRINITY_DN1131_c0_g1,TRINITY_DN11380_c0_g1,TRINITY_DN114391_c0_g1,TRINITY_DN11440_c0_g1,TRINITY_DN116862_c0_g1,TRINITY_DN1171_c0_g1,TRINITY_DN11768_c0_g1,TRINITY_DN1201_c0_g1,TRINITY_DN1201_c0_g3,TRINITY_DN12201_c0_g1,TRINITY_DN12201_c1_g1,…
BP	GO:0009755	hormone-mediated signaling pathway	161	242	403	1502	0.00127	0.0429591	TRINITY_DN10007_c0_g1,TRINITY_DN100869_c0_g1,TRINITY_DN10157_c1_g2,TRINITY_DN1026_c0_g1,TRINITY_DN10301_c0_g1,TRINITY_DN10318_c0_g1,TRINITY_DN103505_c0_g1,TRINITY_DN10401_c0_g1,TRINITY_DN10462_c0_g1,TRINITY_DN10645_c0_g1,TRINITY_DN10681_c0_g1,TRINITY_DN10700_c0_g2,TRINITY_DN10888_c0_g1,TRINITY_DN109277_c0_g1,TRINITY_DN109726_c0_g1,TRINITY_DN10975_c0_g1,TRINITY_DN10975_c0_g2,TRINITY_DN10981_c0_g1,…	TRINITY_DN100544_c0_g1,TRINITY_DN100633_c0_g1,TRINITY_DN10159_c0_g1,TRINITY_DN10203_c0_g1,TRINITY_DN10291_c2_g1,TRINITY_DN10291_c2_g3,TRINITY_DN1031_c0_g1,TRINITY_DN104341_c0_g1,TRINITY_DN104656_c0_g1,TRINITY_DN105270_c0_g1,TRINITY_DN10591_c0_g1,TRINITY_DN1065_c0_g1,TRINITY_DN107689_c0_g1,TRINITY_DN107883_c0_g1,TRINITY_DN108044_c0_g1,TRINITY_DN108731_c0_g1,TRINITY_DN1093_c0_g1,TRINITY_DN110034_c0…
BP	GO:0072521	purine-containing compound metabolic process	24	170	194	679	0.00128	0.0431411	TRINITY_DN11387_c0_g1,TRINITY_DN11415_c0_g1,TRINITY_DN11424_c0_g1,TRINITY_DN11424_c0_g2,TRINITY_DN12595_c0_g1,TRINITY_DN15968_c0_g1,TRINITY_DN16711_c0_g1,TRINITY_DN17872_c0_g1,TRINITY_DN18210_c0_g1,TRINITY_DN18403_c0_g1,TRINITY_DN20713_c0_g1,TRINITY_DN20717_c0_g2,TRINITY_DN3274_c0_g1,TRINITY_DN3797_c0_g2,TRINITY_DN4133_c0_g1,TRINITY_DN4632_c0_g1,TRINITY_DN480_c0_g2,TRINITY_DN4978_c0_g1,TRINITY_DN…	TRINITY_DN100563_c0_g1,TRINITY_DN101674_c0_g1,TRINITY_DN10425_c1_g1,TRINITY_DN104775_c0_g1,TRINITY_DN10625_c0_g1,TRINITY_DN10756_c0_g1,TRINITY_DN10761_c0_g1,TRINITY_DN107701_c0_g1,TRINITY_DN107707_c0_g1,TRINITY_DN109180_c0_g1,TRINITY_DN111993_c0_g1,TRINITY_DN113408_c0_g1,TRINITY_DN11577_c0_g1,TRINITY_DN116721_c0_g1,TRINITY_DN116881_c0_g1,TRINITY_DN117258_c0_g1,TRINITY_DN118738_c0_g1,TRINITY_DN118…
BP	GO:0007568	aging	39	64	103	334	0.00131	0.0439934	TRINITY_DN101353_c0_g1,TRINITY_DN1026_c0_g1,TRINITY_DN10781_c0_g1,TRINITY_DN10917_c0_g1,TRINITY_DN11643_c0_g1,TRINITY_DN11643_c0_g2,TRINITY_DN12766_c1_g1,TRINITY_DN13528_c0_g1,TRINITY_DN1409_c0_g1,TRINITY_DN1420_c0_g1,TRINITY_DN14210_c0_g1,TRINITY_DN14214_c0_g1,TRINITY_DN14214_c0_g2,TRINITY_DN15097_c0_g1,TRINITY_DN15409_c0_g1,TRINITY_DN1742_c0_g1,TRINITY_DN17905_c0_g1,TRINITY_DN2134_c0_g1,TRINITY…	TRINITY_DN10129_c0_g2,TRINITY_DN104775_c0_g1,TRINITY_DN10994_c0_g1,TRINITY_DN112613_c0_g1,TRINITY_DN11380_c0_g1,TRINITY_DN11975_c0_g1,TRINITY_DN120740_c0_g1,TRINITY_DN1231_c0_g1,TRINITY_DN13640_c0_g1,TRINITY_DN1521_c1_g1,TRINITY_DN15484_c0_g1,TRINITY_DN15922_c0_g1,TRINITY_DN16252_c0_g1,TRINITY_DN16388_c1_g1,TRINITY_DN16388_c1_g2,TRINITY_DN17882_c0_g1,TRINITY_DN17905_c0_g2,TRINITY_DN18161_c0_g1,TR…
CC	GO:0031012	extracellular matrix	1	14	15	30	0.00134	0.0448396	TRINITY_DN78104_c0_g1	TRINITY_DN10129_c0_g2,TRINITY_DN11972_c0_g1,TRINITY_DN12490_c0_g1,TRINITY_DN13634_c0_g1,TRINITY_DN19100_c0_g1,TRINITY_DN20229_c0_g2,TRINITY_DN20643_c0_g1,TRINITY_DN21037_c0_g1,TRINITY_DN3076_c0_g1,TRINITY_DN3835_c0_g1,TRINITY_DN41239_c1_g3,TRINITY_DN42458_c0_g2,TRINITY_DN57214_c0_g1,TRINITY_DN72336_c0_g1
BP	GO:0051704	multi-organism process	210	494	704	2719	0.00136	0.0451849	TRINITY_DN10019_c0_g1,TRINITY_DN100869_c0_g1,TRINITY_DN100945_c0_g1,TRINITY_DN10263_c0_g1,TRINITY_DN1026_c0_g1,TRINITY_DN10320_c0_g1,TRINITY_DN103505_c0_g1,TRINITY_DN103968_c0_g1,TRINITY_DN10684_c0_g1,TRINITY_DN10700_c0_g2,TRINITY_DN108313_c0_g1,TRINITY_DN10895_c0_g1,TRINITY_DN109104_c0_g1,TRINITY_DN10918_c0_g1,TRINITY_DN10975_c0_g1,TRINITY_DN10975_c0_g2,TRINITY_DN10976_c0_g1,TRINITY_DN11008_c0_g…	TRINITY_DN100117_c0_g1,TRINITY_DN100389_c0_g1,TRINITY_DN100951_c0_g1,TRINITY_DN101198_c0_g1,TRINITY_DN10159_c0_g1,TRINITY_DN101686_c0_g1,TRINITY_DN10217_c0_g1,TRINITY_DN10229_c0_g1,TRINITY_DN102_c0_g4,TRINITY_DN102_c1_g1,TRINITY_DN103491_c0_g1,TRINITY_DN103536_c0_g1,TRINITY_DN103565_c0_g1,TRINITY_DN104264_c0_g1,TRINITY_DN104341_c0_g1,TRINITY_DN104419_c0_g1,TRINITY_DN104493_c0_g1,TRINITY_DN10460_c…
BP	GO:0015691	cadmium ion transport	2	9	11	19	0.00136	0.0451849	TRINITY_DN5756_c1_g1,TRINITY_DN605_c0_g1	TRINITY_DN18205_c0_g1,TRINITY_DN18660_c0_g2,TRINITY_DN21708_c0_g1,TRINITY_DN4213_c0_g1,TRINITY_DN4377_c0_g1,TRINITY_DN4377_c0_g2,TRINITY_DN44412_c0_g1,TRINITY_DN5432_c0_g1,TRINITY_DN6930_c0_g1
BP	GO:0048653	anther development	9	30	39	106	0.0015	0.0496596	TRINITY_DN10019_c0_g1,TRINITY_DN1612_c1_g3,TRINITY_DN17239_c0_g1,TRINITY_DN17280_c0_g1,TRINITY_DN1903_c0_g1,TRINITY_DN19975_c0_g1,TRINITY_DN22760_c0_g1,TRINITY_DN2923_c0_g1,TRINITY_DN9916_c0_g1	TRINITY_DN100951_c0_g1,TRINITY_DN10351_c0_g1,TRINITY_DN10724_c0_g1,TRINITY_DN112199_c0_g1,TRINITY_DN11783_c0_g1,TRINITY_DN13823_c0_g1,TRINITY_DN13823_c0_g2,TRINITY_DN1391_c2_g1,TRINITY_DN14134_c0_g1,TRINITY_DN16381_c0_g1,TRINITY_DN16425_c0_g1,TRINITY_DN16498_c0_g1,TRINITY_DN16637_c0_g1,TRINITY_DN17353_c1_g1,TRINITY_DN21086_c0_g1,TRINITY_DN23122_c0_g1,TRINITY_DN24923_c0_g1,TRINITY_DN27273_c0_g2,TR…
BP	GO:0009817	defense response to fungus, incompatible interaction	15	14	29	73	0.00151	0.049814	TRINITY_DN113401_c0_g1,TRINITY_DN11417_c0_g2,TRINITY_DN12357_c0_g1,TRINITY_DN13512_c0_g2,TRINITY_DN14214_c0_g1,TRINITY_DN14214_c0_g2,TRINITY_DN15536_c0_g1,TRINITY_DN1906_c0_g1,TRINITY_DN20502_c0_g1,TRINITY_DN23730_c0_g1,TRINITY_DN2439_c0_g3,TRINITY_DN31354_c0_g1,TRINITY_DN61566_c0_g1,TRINITY_DN6291_c0_g1,TRINITY_DN8593_c0_g1	TRINITY_DN102_c0_g4,TRINITY_DN107883_c0_g1,TRINITY_DN113657_c0_g1,TRINITY_DN11604_c0_g3,TRINITY_DN12356_c0_g1,TRINITY_DN13512_c0_g1,TRINITY_DN17401_c0_g1,TRINITY_DN20525_c0_g2,TRINITY_DN37529_c0_g1,TRINITY_DN4308_c0_g1,TRINITY_DN5432_c0_g1,TRINITY_DN79811_c0_g1,TRINITY_DN95019_c0_g1,TRINITY_DN9548_c0_g1
BP	GO:0098655	cation transmembrane transport	52	171	223	794	0.00153	0.0502961	TRINITY_DN103517_c0_g1,TRINITY_DN10918_c0_g1,TRINITY_DN11059_c0_g1,TRINITY_DN112480_c0_g1,TRINITY_DN11387_c0_g1,TRINITY_DN11519_c0_g1,TRINITY_DN1179_c0_g2,TRINITY_DN11988_c0_g1,TRINITY_DN11997_c0_g1,TRINITY_DN120916_c0_g1,TRINITY_DN12200_c0_g2,TRINITY_DN122658_c0_g1,TRINITY_DN12484_c0_g1,TRINITY_DN12970_c0_g1,TRINITY_DN1299_c0_g2,TRINITY_DN13151_c0_g1,TRINITY_DN13916_c0_g1,TRINITY_DN1546_c2_g1,TR…	TRINITY_DN101214_c0_g1,TRINITY_DN101674_c0_g1,TRINITY_DN10368_c0_g1,TRINITY_DN1038_c0_g1,TRINITY_DN103925_c0_g1,TRINITY_DN104516_c0_g1,TRINITY_DN104909_c0_g1,TRINITY_DN107701_c0_g1,TRINITY_DN11072_c0_g1,TRINITY_DN113365_c0_g1,TRINITY_DN113408_c0_g1,TRINITY_DN11499_c0_g1,TRINITY_DN11556_c0_g1,TRINITY_DN116465_c0_g1,TRINITY_DN1169_c0_g1,TRINITY_DN1169_c0_g2,TRINITY_DN117598_c0_g1,TRINITY_DN117742_c…
BP	GO:1902170	cellular response to reactive nitrogen species	3	19	22	51	0.00157	0.0514299	TRINITY_DN11050_c0_g1,TRINITY_DN13916_c0_g1,TRINITY_DN7489_c0_g1	TRINITY_DN104775_c0_g1,TRINITY_DN12766_c0_g1,TRINITY_DN12766_c0_g2,TRINITY_DN13640_c0_g1,TRINITY_DN15922_c0_g1,TRINITY_DN16898_c0_g1,TRINITY_DN21708_c0_g1,TRINITY_DN22046_c0_g2,TRINITY_DN2329_c0_g1,TRINITY_DN27506_c0_g1,TRINITY_DN289_c0_g1,TRINITY_DN3091_c0_g1,TRINITY_DN4001_c0_g1,TRINITY_DN4089_c0_g1,TRINITY_DN4602_c0_g1,TRINITY_DN5364_c0_g1,TRINITY_DN55189_c0_g3,TRINITY_DN5963_c0_g1,TRINITY_DN9…
BP	GO:0009699	phenylpropanoid biosynthetic process	8	44	52	151	0.00159	0.0518667	TRINITY_DN11597_c0_g1,TRINITY_DN1171_c1_g1,TRINITY_DN15640_c0_g1,TRINITY_DN17163_c0_g1,TRINITY_DN25383_c0_g1,TRINITY_DN3060_c0_g4,TRINITY_DN4833_c0_g1,TRINITY_DN77585_c0_g1	TRINITY_DN10012_c0_g1,TRINITY_DN11871_c0_g1,TRINITY_DN12747_c0_g1,TRINITY_DN14117_c0_g1,TRINITY_DN14130_c0_g1,TRINITY_DN14256_c0_g1,TRINITY_DN14467_c0_g1,TRINITY_DN15_c2_g1,TRINITY_DN1689_c0_g1,TRINITY_DN17917_c0_g1,TRINITY_DN18607_c0_g1,TRINITY_DN1868_c0_g2,TRINITY_DN1926_c0_g1,TRINITY_DN21181_c0_g1,TRINITY_DN23180_c0_g1,TRINITY_DN2475_c0_g1,TRINITY_DN2475_c0_g2,TRINITY_DN2607_c0_g1,TRINITY_DN26…
BP	GO:0010623	programmed cell death involved in cell development	2	15	17	36	0.0016	0.0518667	TRINITY_DN14214_c0_g1,TRINITY_DN14214_c0_g2	TRINITY_DN100951_c0_g1,TRINITY_DN112199_c0_g1,TRINITY_DN13823_c0_g1,TRINITY_DN13823_c0_g2,TRINITY_DN14199_c0_g1,TRINITY_DN14991_c0_g1,TRINITY_DN16381_c0_g1,TRINITY_DN227_c0_g1,TRINITY_DN27273_c0_g2,TRINITY_DN35540_c0_g4,TRINITY_DN39122_c0_g1,TRINITY_DN67694_c0_g1,TRINITY_DN6860_c2_g1,TRINITY_DN6860_c2_g2,TRINITY_DN6860_c3_g1
BP	GO:1902882	regulation of response to oxidative stress	3	14	17	36	0.0016	0.0518667	TRINITY_DN15097_c0_g1,TRINITY_DN1843_c0_g1,TRINITY_DN8014_c2_g1	TRINITY_DN100489_c0_g1,TRINITY_DN103891_c0_g1,TRINITY_DN103925_c0_g1,TRINITY_DN107924_c0_g1,TRINITY_DN17815_c0_g1,TRINITY_DN21933_c0_g2,TRINITY_DN2194_c0_g1,TRINITY_DN25651_c0_g1,TRINITY_DN25875_c0_g1,TRINITY_DN26364_c0_g1,TRINITY_DN30499_c0_g1,TRINITY_DN36426_c0_g1,TRINITY_DN38113_c0_g2,TRINITY_DN90657_c0_g1
BP	GO:0009152	purine ribonucleotide biosynthetic process	21	106	127	426	0.00164	0.0529794	TRINITY_DN11387_c0_g1,TRINITY_DN11415_c0_g1,TRINITY_DN11424_c0_g1,TRINITY_DN11424_c0_g2,TRINITY_DN12595_c0_g1,TRINITY_DN15968_c0_g1,TRINITY_DN16711_c0_g1,TRINITY_DN17872_c0_g1,TRINITY_DN18403_c0_g1,TRINITY_DN20713_c0_g1,TRINITY_DN20717_c0_g2,TRINITY_DN3274_c0_g1,TRINITY_DN3797_c0_g2,TRINITY_DN4133_c0_g1,TRINITY_DN4632_c0_g1,TRINITY_DN480_c0_g2,TRINITY_DN4978_c0_g1,TRINITY_DN5076_c0_g1,TRINITY_DN5…	TRINITY_DN100563_c0_g1,TRINITY_DN10425_c1_g1,TRINITY_DN104775_c0_g1,TRINITY_DN10625_c0_g1,TRINITY_DN10761_c0_g1,TRINITY_DN107701_c0_g1,TRINITY_DN107707_c0_g1,TRINITY_DN109180_c0_g1,TRINITY_DN113408_c0_g1,TRINITY_DN11577_c0_g1,TRINITY_DN116721_c0_g1,TRINITY_DN116881_c0_g1,TRINITY_DN118773_c0_g1,TRINITY_DN12336_c0_g1,TRINITY_DN12676_c0_g1,TRINITY_DN13293_c0_g1,TRINITY_DN13640_c0_g1,TRINITY_DN13783_…
BP	GO:0006754	ATP biosynthetic process	12	75	87	277	0.00165	0.0531186	TRINITY_DN11387_c0_g1,TRINITY_DN11424_c0_g1,TRINITY_DN11424_c0_g2,TRINITY_DN15968_c0_g1,TRINITY_DN16711_c0_g1,TRINITY_DN18403_c0_g1,TRINITY_DN20713_c0_g1,TRINITY_DN4632_c0_g1,TRINITY_DN480_c0_g2,TRINITY_DN4978_c0_g1,TRINITY_DN61566_c0_g1,TRINITY_DN8791_c0_g1	TRINITY_DN100563_c0_g1,TRINITY_DN104775_c0_g1,TRINITY_DN10761_c0_g1,TRINITY_DN107701_c0_g1,TRINITY_DN107707_c0_g1,TRINITY_DN113408_c0_g1,TRINITY_DN11577_c0_g1,TRINITY_DN116721_c0_g1,TRINITY_DN116881_c0_g1,TRINITY_DN118773_c0_g1,TRINITY_DN12336_c0_g1,TRINITY_DN12676_c0_g1,TRINITY_DN13293_c0_g1,TRINITY_DN13640_c0_g1,TRINITY_DN13783_c0_g2,TRINITY_DN15111_c0_g1,TRINITY_DN15900_c0_g1,TRINITY_DN15900_c…
BP	GO:0071329	cellular response to sucrose stimulus	5	7	12	22	0.00166	0.0532569	TRINITY_DN1339_c0_g1,TRINITY_DN1339_c0_g2,TRINITY_DN21012_c0_g1,TRINITY_DN8607_c0_g1,TRINITY_DN88908_c0_g1	TRINITY_DN121430_c0_g1,TRINITY_DN21585_c0_g1,TRINITY_DN28073_c0_g1,TRINITY_DN4250_c0_g1,TRINITY_DN56896_c0_g1,TRINITY_DN71602_c0_g1,TRINITY_DN7418_c0_g1
BP	GO:0009058	biosynthetic process	605	1526	2131	8654	0.00168	0.053714	TRINITY_DN10019_c0_g1,TRINITY_DN10022_c0_g1,TRINITY_DN10050_c1_g1,TRINITY_DN10053_c0_g1,TRINITY_DN10053_c0_g2,TRINITY_DN10130_c0_g1,TRINITY_DN101353_c0_g1,TRINITY_DN101651_c0_g1,TRINITY_DN10167_c0_g1,TRINITY_DN10179_c0_g1,TRINITY_DN10195_c0_g1,TRINITY_DN1026_c0_g1,TRINITY_DN10301_c0_g1,TRINITY_DN10320_c0_g1,TRINITY_DN103534_c0_g1,TRINITY_DN103968_c0_g1,TRINITY_DN10401_c0_g1,TRINITY_DN10422_c0_g1,…	TRINITY_DN100009_c0_g1,TRINITY_DN10012_c0_g1,TRINITY_DN100343_c0_g1,TRINITY_DN100356_c0_g1,TRINITY_DN100388_c0_g1,TRINITY_DN100406_c0_g1,TRINITY_DN100544_c0_g1,TRINITY_DN100563_c0_g1,TRINITY_DN100601_c0_g1,TRINITY_DN100625_c0_g1,TRINITY_DN100700_c0_g1,TRINITY_DN100728_c0_g1,TRINITY_DN100779_c0_g1,TRINITY_DN100824_c0_g1,TRINITY_DN100860_c0_g1,TRINITY_DN100883_c0_g1,TRINITY_DN1008_c0_g1,TRINITY_DN1…
MF	GO:0035251	UDP-glucosyltransferase activity	35	42	77	237	0.00175	0.0557611	TRINITY_DN108374_c0_g1,TRINITY_DN1104_c0_g2,TRINITY_DN1104_c0_g3,TRINITY_DN1104_c0_g4,TRINITY_DN11950_c0_g1,TRINITY_DN120385_c0_g1,TRINITY_DN12216_c1_g1,TRINITY_DN12293_c0_g1,TRINITY_DN123184_c0_g1,TRINITY_DN13830_c0_g1,TRINITY_DN13835_c0_g1,TRINITY_DN13860_c0_g1,TRINITY_DN15085_c0_g1,TRINITY_DN15090_c0_g1,TRINITY_DN16003_c1_g2,TRINITY_DN16240_c0_g1,TRINITY_DN16505_c0_g1,TRINITY_DN16726_c0_g1,TRI…	TRINITY_DN1104_c0_g1,TRINITY_DN111250_c0_g1,TRINITY_DN111954_c0_g1,TRINITY_DN113091_c0_g1,TRINITY_DN11768_c0_g1,TRINITY_DN13082_c0_g1,TRINITY_DN13815_c0_g3,TRINITY_DN15182_c0_g1,TRINITY_DN15923_c0_g1,TRINITY_DN159_c0_g3,TRINITY_DN159_c7_g1,TRINITY_DN16003_c1_g1,TRINITY_DN16240_c0_g2,TRINITY_DN16376_c0_g1,TRINITY_DN16503_c0_g1,TRINITY_DN1732_c0_g1,TRINITY_DN1868_c0_g2,TRINITY_DN19428_c0_g1,TRINITY…
CC	GO:0005930	axoneme	0	24	24	58	0.00176	0.055889	-	TRINITY_DN10023_c2_g1,TRINITY_DN10616_c0_g1,TRINITY_DN108367_c0_g1,TRINITY_DN11323_c1_g1,TRINITY_DN18122_c0_g1,TRINITY_DN18243_c0_g1,TRINITY_DN18243_c0_g2,TRINITY_DN18638_c0_g1,TRINITY_DN18638_c0_g3,TRINITY_DN21268_c0_g3,TRINITY_DN23097_c0_g1,TRINITY_DN2320_c0_g1,TRINITY_DN24619_c0_g1,TRINITY_DN36583_c0_g1,TRINITY_DN45398_c0_g1,TRINITY_DN545_c2_g1,TRINITY_DN56615_c0_g3,TRINITY_DN68282_c0_g1,TRINI…
BP	GO:0015893	drug transport	22	58	80	252	0.00178	0.0563325	TRINITY_DN10248_c0_g3,TRINITY_DN10918_c0_g1,TRINITY_DN13837_c0_g1,TRINITY_DN13916_c0_g1,TRINITY_DN14577_c0_g1,TRINITY_DN14888_c0_g1,TRINITY_DN18190_c0_g1,TRINITY_DN20894_c0_g1,TRINITY_DN2248_c1_g1,TRINITY_DN23883_c0_g1,TRINITY_DN2393_c2_g1,TRINITY_DN2456_c0_g1,TRINITY_DN3110_c0_g1,TRINITY_DN31243_c0_g1,TRINITY_DN35455_c0_g1,TRINITY_DN4315_c0_g1,TRINITY_DN4762_c0_g1,TRINITY_DN5399_c0_g1,TRINITY_DN…	TRINITY_DN104516_c0_g1,TRINITY_DN109375_c0_g1,TRINITY_DN11072_c0_g1,TRINITY_DN11367_c0_g1,TRINITY_DN11791_c0_g1,TRINITY_DN11920_c0_g1,TRINITY_DN12505_c0_g1,TRINITY_DN13663_c0_g1,TRINITY_DN14337_c4_g1,TRINITY_DN14481_c0_g1,TRINITY_DN14689_c0_g1,TRINITY_DN15017_c0_g1,TRINITY_DN15295_c0_g1,TRINITY_DN15840_c0_g1,TRINITY_DN16150_c1_g1,TRINITY_DN17007_c0_g1,TRINITY_DN17400_c0_g1,TRINITY_DN178_c1_g1,TRI…
CC	GO:0036156	inner dynein arm	0	10	10	17	0.00181	0.0570884	-	TRINITY_DN10023_c2_g1,TRINITY_DN10616_c0_g1,TRINITY_DN11323_c1_g1,TRINITY_DN18243_c0_g1,TRINITY_DN18243_c0_g2,TRINITY_DN18638_c0_g1,TRINITY_DN18638_c0_g3,TRINITY_DN23097_c0_g1,TRINITY_DN9756_c0_g1,TRINITY_DN9756_c2_g3
BP	GO:0006165	nucleoside diphosphate phosphorylation	8	57	65	198	0.00184	0.0574287	TRINITY_DN11424_c0_g1,TRINITY_DN11424_c0_g2,TRINITY_DN15968_c0_g1,TRINITY_DN16711_c0_g1,TRINITY_DN18403_c0_g1,TRINITY_DN20713_c0_g1,TRINITY_DN480_c0_g2,TRINITY_DN8791_c0_g1	TRINITY_DN100563_c0_g1,TRINITY_DN104775_c0_g1,TRINITY_DN10625_c0_g1,TRINITY_DN10761_c0_g1,TRINITY_DN107707_c0_g1,TRINITY_DN11577_c0_g1,TRINITY_DN116721_c0_g1,TRINITY_DN116881_c0_g1,TRINITY_DN118773_c0_g1,TRINITY_DN13293_c0_g1,TRINITY_DN13640_c0_g1,TRINITY_DN13783_c0_g2,TRINITY_DN13961_c0_g1,TRINITY_DN15111_c0_g1,TRINITY_DN1637_c0_g1,TRINITY_DN16476_c0_g1,TRINITY_DN17334_c1_g1,TRINITY_DN18919_c0_g…
BP	GO:0015837	amine transport	4	4	8	12	0.00184	0.0574287	TRINITY_DN16193_c0_g1,TRINITY_DN16193_c1_g1,TRINITY_DN16193_c1_g2,TRINITY_DN9881_c1_g1	TRINITY_DN117598_c0_g1,TRINITY_DN12069_c0_g1,TRINITY_DN12069_c0_g3,TRINITY_DN6087_c0_g1
MF	GO:0005216	ion channel activity	28	50	78	241	0.00185	0.0574287	TRINITY_DN107776_c0_g1,TRINITY_DN11387_c0_g1,TRINITY_DN12484_c0_g1,TRINITY_DN14920_c0_g1,TRINITY_DN16551_c1_g1,TRINITY_DN16702_c0_g1,TRINITY_DN20195_c0_g1,TRINITY_DN21630_c0_g1,TRINITY_DN24232_c0_g1,TRINITY_DN24391_c0_g1,TRINITY_DN25890_c0_g1,TRINITY_DN2737_c0_g1,TRINITY_DN273_c0_g1,TRINITY_DN28431_c0_g1,TRINITY_DN33782_c0_g1,TRINITY_DN42_c1_g2,TRINITY_DN4632_c0_g1,TRINITY_DN4733_c0_g1,TRINITY_DN…	TRINITY_DN107701_c0_g1,TRINITY_DN113408_c0_g1,TRINITY_DN1169_c0_g1,TRINITY_DN1169_c0_g2,TRINITY_DN11989_c0_g2,TRINITY_DN12066_c0_g1,TRINITY_DN12336_c0_g1,TRINITY_DN15900_c0_g1,TRINITY_DN15900_c1_g1,TRINITY_DN15991_c0_g1,TRINITY_DN16643_c0_g1,TRINITY_DN18075_c0_g1,TRINITY_DN18355_c0_g1,TRINITY_DN19003_c0_g1,TRINITY_DN19936_c1_g1,TRINITY_DN20021_c0_g1,TRINITY_DN20569_c1_g1,TRINITY_DN20876_c0_g1,TRI…
BP	GO:0072522	purine-containing compound biosynthetic process	21	112	133	450	0.00185	0.0574287	TRINITY_DN11387_c0_g1,TRINITY_DN11415_c0_g1,TRINITY_DN11424_c0_g1,TRINITY_DN11424_c0_g2,TRINITY_DN12595_c0_g1,TRINITY_DN15968_c0_g1,TRINITY_DN16711_c0_g1,TRINITY_DN17872_c0_g1,TRINITY_DN18403_c0_g1,TRINITY_DN20713_c0_g1,TRINITY_DN20717_c0_g2,TRINITY_DN3274_c0_g1,TRINITY_DN3797_c0_g2,TRINITY_DN4133_c0_g1,TRINITY_DN4632_c0_g1,TRINITY_DN480_c0_g2,TRINITY_DN4978_c0_g1,TRINITY_DN5076_c0_g1,TRINITY_DN5…	TRINITY_DN100563_c0_g1,TRINITY_DN10425_c1_g1,TRINITY_DN104775_c0_g1,TRINITY_DN10625_c0_g1,TRINITY_DN10761_c0_g1,TRINITY_DN107701_c0_g1,TRINITY_DN107707_c0_g1,TRINITY_DN109180_c0_g1,TRINITY_DN113408_c0_g1,TRINITY_DN11577_c0_g1,TRINITY_DN116721_c0_g1,TRINITY_DN116881_c0_g1,TRINITY_DN118773_c0_g1,TRINITY_DN120882_c0_g1,TRINITY_DN12336_c0_g1,TRINITY_DN12676_c0_g1,TRINITY_DN13293_c0_g1,TRINITY_DN13640…
BP	GO:0016144	S-glycoside biosynthetic process	18	7	25	61	0.00187	0.0574287	TRINITY_DN10508_c0_g1,TRINITY_DN11008_c0_g1,TRINITY_DN120433_c0_g1,TRINITY_DN13132_c0_g1,TRINITY_DN13593_c0_g1,TRINITY_DN18384_c0_g2,TRINITY_DN1858_c0_g1,TRINITY_DN205_c0_g1,TRINITY_DN21826_c0_g1,TRINITY_DN22570_c0_g1,TRINITY_DN3594_c0_g1,TRINITY_DN3666_c0_g1,TRINITY_DN3719_c0_g1,TRINITY_DN3797_c0_g2,TRINITY_DN506_c0_g3,TRINITY_DN6502_c0_g1,TRINITY_DN6967_c0_g1,TRINITY_DN8633_c0_g1	TRINITY_DN10591_c0_g1,TRINITY_DN11293_c0_g1,TRINITY_DN22200_c0_g1,TRINITY_DN25231_c0_g1,TRINITY_DN25840_c0_g1,TRINITY_DN34567_c0_g1,TRINITY_DN34774_c0_g1
BP	GO:0019758	glycosinolate biosynthetic process	18	7	25	61	0.00187	0.0574287	TRINITY_DN10508_c0_g1,TRINITY_DN11008_c0_g1,TRINITY_DN120433_c0_g1,TRINITY_DN13132_c0_g1,TRINITY_DN13593_c0_g1,TRINITY_DN18384_c0_g2,TRINITY_DN1858_c0_g1,TRINITY_DN205_c0_g1,TRINITY_DN21826_c0_g1,TRINITY_DN22570_c0_g1,TRINITY_DN3594_c0_g1,TRINITY_DN3666_c0_g1,TRINITY_DN3719_c0_g1,TRINITY_DN3797_c0_g2,TRINITY_DN506_c0_g3,TRINITY_DN6502_c0_g1,TRINITY_DN6967_c0_g1,TRINITY_DN8633_c0_g1	TRINITY_DN10591_c0_g1,TRINITY_DN11293_c0_g1,TRINITY_DN22200_c0_g1,TRINITY_DN25231_c0_g1,TRINITY_DN25840_c0_g1,TRINITY_DN34567_c0_g1,TRINITY_DN34774_c0_g1
BP	GO:0019761	glucosinolate biosynthetic process	18	7	25	61	0.00187	0.0574287	TRINITY_DN10508_c0_g1,TRINITY_DN11008_c0_g1,TRINITY_DN120433_c0_g1,TRINITY_DN13132_c0_g1,TRINITY_DN13593_c0_g1,TRINITY_DN18384_c0_g2,TRINITY_DN1858_c0_g1,TRINITY_DN205_c0_g1,TRINITY_DN21826_c0_g1,TRINITY_DN22570_c0_g1,TRINITY_DN3594_c0_g1,TRINITY_DN3666_c0_g1,TRINITY_DN3719_c0_g1,TRINITY_DN3797_c0_g2,TRINITY_DN506_c0_g3,TRINITY_DN6502_c0_g1,TRINITY_DN6967_c0_g1,TRINITY_DN8633_c0_g1	TRINITY_DN10591_c0_g1,TRINITY_DN11293_c0_g1,TRINITY_DN22200_c0_g1,TRINITY_DN25231_c0_g1,TRINITY_DN25840_c0_g1,TRINITY_DN34567_c0_g1,TRINITY_DN34774_c0_g1
BP	GO:0000302	response to reactive oxygen species	29	79	108	356	0.00187	0.0574287	TRINITY_DN10074_c0_g1,TRINITY_DN11050_c0_g1,TRINITY_DN11643_c0_g1,TRINITY_DN11643_c0_g2,TRINITY_DN13528_c0_g1,TRINITY_DN13916_c0_g1,TRINITY_DN1409_c0_g1,TRINITY_DN15097_c0_g1,TRINITY_DN15963_c0_g1,TRINITY_DN1858_c0_g1,TRINITY_DN19740_c0_g1,TRINITY_DN19975_c0_g1,TRINITY_DN20174_c0_g1,TRINITY_DN20894_c0_g1,TRINITY_DN23656_c0_g1,TRINITY_DN2453_c0_g1,TRINITY_DN2456_c0_g1,TRINITY_DN2737_c0_g1,TRINITY_…	TRINITY_DN103491_c0_g1,TRINITY_DN10436_c0_g1,TRINITY_DN104775_c0_g1,TRINITY_DN10831_c0_g1,TRINITY_DN108440_c0_g1,TRINITY_DN10921_c0_g1,TRINITY_DN113263_c0_g1,TRINITY_DN11383_c0_g1,TRINITY_DN11712_c0_g1,TRINITY_DN120925_c0_g1,TRINITY_DN12766_c0_g1,TRINITY_DN12766_c0_g2,TRINITY_DN13144_c0_g2,TRINITY_DN13640_c0_g1,TRINITY_DN15421_c0_g4,TRINITY_DN15624_c0_g1,TRINITY_DN15828_c0_g3,TRINITY_DN15922_c0_g…
BP	GO:0060688	regulation of morphogenesis of a branching structure	2	11	13	25	0.0019	0.0577798	TRINITY_DN2335_c0_g1,TRINITY_DN25370_c0_g1	TRINITY_DN102475_c0_g1,TRINITY_DN120622_c0_g1,TRINITY_DN12337_c0_g1,TRINITY_DN12337_c0_g2,TRINITY_DN16150_c0_g1,TRINITY_DN19756_c0_g2,TRINITY_DN5682_c0_g1,TRINITY_DN8435_c1_g1,TRINITY_DN8797_c0_g1,TRINITY_DN8797_c0_g2,TRINITY_DN96124_c0_g1
BP	GO:2000032	regulation of secondary shoot formation	2	11	13	25	0.0019	0.0577798	TRINITY_DN2335_c0_g1,TRINITY_DN25370_c0_g1	TRINITY_DN102475_c0_g1,TRINITY_DN120622_c0_g1,TRINITY_DN12337_c0_g1,TRINITY_DN12337_c0_g2,TRINITY_DN16150_c0_g1,TRINITY_DN19756_c0_g2,TRINITY_DN5682_c0_g1,TRINITY_DN8435_c1_g1,TRINITY_DN8797_c0_g1,TRINITY_DN8797_c0_g2,TRINITY_DN96124_c0_g1
BP	GO:0003333	amino acid transmembrane transport	14	27	41	114	0.0019	0.0577798	TRINITY_DN11284_c0_g1,TRINITY_DN11284_c0_g2,TRINITY_DN11693_c0_g2,TRINITY_DN1596_c0_g1,TRINITY_DN16193_c0_g1,TRINITY_DN16193_c1_g1,TRINITY_DN16193_c1_g2,TRINITY_DN16974_c0_g1,TRINITY_DN2112_c0_g1,TRINITY_DN28447_c0_g1,TRINITY_DN3110_c0_g1,TRINITY_DN4031_c0_g1,TRINITY_DN97027_c0_g1,TRINITY_DN9881_c1_g1	TRINITY_DN104516_c0_g1,TRINITY_DN11791_c0_g1,TRINITY_DN16032_c0_g1,TRINITY_DN17400_c0_g1,TRINITY_DN18201_c0_g1,TRINITY_DN18296_c0_g1,TRINITY_DN21419_c0_g1,TRINITY_DN23436_c0_g1,TRINITY_DN24110_c0_g1,TRINITY_DN24603_c0_g1,TRINITY_DN26003_c0_g1,TRINITY_DN28419_c0_g1,TRINITY_DN32415_c0_g1,TRINITY_DN34012_c0_g1,TRINITY_DN37495_c0_g1,TRINITY_DN37542_c0_g1,TRINITY_DN4129_c0_g1,TRINITY_DN5153_c1_g3,TRIN…
MF	GO:0016722	oxidoreductase activity, oxidizing metal ions	8	16	24	57	0.00191	0.0578953	TRINITY_DN26635_c0_g1,TRINITY_DN31702_c0_g1,TRINITY_DN31832_c0_g1,TRINITY_DN40055_c0_g1,TRINITY_DN4068_c0_g1,TRINITY_DN4833_c0_g1,TRINITY_DN60954_c0_g1,TRINITY_DN77585_c0_g1	TRINITY_DN10229_c0_g1,TRINITY_DN10521_c0_g1,TRINITY_DN14117_c0_g1,TRINITY_DN15019_c0_g1,TRINITY_DN15019_c0_g2,TRINITY_DN19812_c0_g1,TRINITY_DN23176_c0_g1,TRINITY_DN36748_c0_g1,TRINITY_DN4220_c0_g2,TRINITY_DN5459_c0_g1,TRINITY_DN5459_c0_g2,TRINITY_DN6337_c0_g1,TRINITY_DN8028_c0_g1,TRINITY_DN908_c0_g1,TRINITY_DN9693_c0_g1,TRINITY_DN98814_c0_g1
BP	GO:0034755	iron ion transmembrane transport	2	8	10	17	0.00192	0.0580101	TRINITY_DN10918_c0_g1,TRINITY_DN605_c0_g1	TRINITY_DN12785_c0_g1,TRINITY_DN12785_c0_g2,TRINITY_DN21708_c0_g1,TRINITY_DN3091_c0_g1,TRINITY_DN58398_c0_g2,TRINITY_DN642_c0_g1,TRINITY_DN9186_c0_g1,TRINITY_DN953_c0_g1
MF	GO:0015103	inorganic anion transmembrane transporter activity	19	29	48	136	0.00194	0.0584253	TRINITY_DN10775_c0_g1,TRINITY_DN11262_c0_g1,TRINITY_DN11704_c0_g2,TRINITY_DN13229_c0_g1,TRINITY_DN14920_c0_g1,TRINITY_DN1497_c0_g1,TRINITY_DN16551_c1_g1,TRINITY_DN16702_c0_g1,TRINITY_DN16716_c0_g1,TRINITY_DN16736_c0_g1,TRINITY_DN1695_c1_g2,TRINITY_DN26223_c0_g1,TRINITY_DN273_c0_g1,TRINITY_DN3437_c0_g1,TRINITY_DN4232_c0_g1,TRINITY_DN4315_c0_g1,TRINITY_DN4733_c0_g1,TRINITY_DN563_c3_g1,TRINITY_DN758…	TRINITY_DN108718_c0_g1,TRINITY_DN120647_c0_g1,TRINITY_DN12689_c0_g1,TRINITY_DN14481_c0_g1,TRINITY_DN14689_c0_g1,TRINITY_DN16643_c0_g1,TRINITY_DN16898_c0_g1,TRINITY_DN17007_c0_g1,TRINITY_DN178_c1_g1,TRINITY_DN18075_c0_g1,TRINITY_DN21803_c0_g1,TRINITY_DN22046_c0_g2,TRINITY_DN22238_c1_g1,TRINITY_DN23042_c0_g1,TRINITY_DN23748_c0_g1,TRINITY_DN25156_c0_g1,TRINITY_DN273_c0_g2,TRINITY_DN289_c0_g1,TRINITY…
BP	GO:0046939	nucleotide phosphorylation	8	58	66	202	0.00195	0.0585376	TRINITY_DN11424_c0_g1,TRINITY_DN11424_c0_g2,TRINITY_DN15968_c0_g1,TRINITY_DN16711_c0_g1,TRINITY_DN18403_c0_g1,TRINITY_DN20713_c0_g1,TRINITY_DN480_c0_g2,TRINITY_DN8791_c0_g1	TRINITY_DN100563_c0_g1,TRINITY_DN104775_c0_g1,TRINITY_DN10625_c0_g1,TRINITY_DN10761_c0_g1,TRINITY_DN107707_c0_g1,TRINITY_DN11577_c0_g1,TRINITY_DN116721_c0_g1,TRINITY_DN116881_c0_g1,TRINITY_DN118773_c0_g1,TRINITY_DN13293_c0_g1,TRINITY_DN13640_c0_g1,TRINITY_DN13783_c0_g2,TRINITY_DN13961_c0_g1,TRINITY_DN15111_c0_g1,TRINITY_DN1637_c0_g1,TRINITY_DN16476_c0_g1,TRINITY_DN17334_c1_g1,TRINITY_DN18919_c0_g…
BP	GO:0009314	response to radiation	158	192	350	1299	0.00196	0.0586492	TRINITY_DN10098_c0_g1,TRINITY_DN101651_c0_g1,TRINITY_DN10179_c0_g1,TRINITY_DN10301_c0_g1,TRINITY_DN10318_c0_g1,TRINITY_DN103505_c0_g1,TRINITY_DN103509_c0_g1,TRINITY_DN10422_c0_g1,TRINITY_DN10462_c0_g1,TRINITY_DN10508_c0_g1,TRINITY_DN10618_c0_g1,TRINITY_DN10681_c0_g1,TRINITY_DN108313_c0_g1,TRINITY_DN10840_c0_g1,TRINITY_DN10918_c0_g1,TRINITY_DN10978_c0_g2,TRINITY_DN11160_c0_g1,TRINITY_DN11342_c0_g1…	TRINITY_DN100343_c0_g1,TRINITY_DN100356_c0_g1,TRINITY_DN100489_c0_g1,TRINITY_DN100955_c0_g1,TRINITY_DN10129_c0_g2,TRINITY_DN10142_c0_g1,TRINITY_DN101686_c0_g1,TRINITY_DN103891_c0_g1,TRINITY_DN103938_c0_g1,TRINITY_DN104775_c0_g1,TRINITY_DN10591_c0_g1,TRINITY_DN10596_c0_g1,TRINITY_DN107924_c0_g1,TRINITY_DN108440_c0_g1,TRINITY_DN109069_c0_g1,TRINITY_DN10921_c0_g1,TRINITY_DN110319_c0_g1,TRINITY_DN111…
BP	GO:0016054	organic acid catabolic process	36	56	92	297	0.00198	0.0588703	TRINITY_DN10563_c0_g1,TRINITY_DN107962_c0_g1,TRINITY_DN1104_c0_g4,TRINITY_DN11342_c0_g1,TRINITY_DN11573_c0_g1,TRINITY_DN12999_c0_g2,TRINITY_DN13574_c0_g1,TRINITY_DN16079_c0_g1,TRINITY_DN17109_c0_g1,TRINITY_DN17899_c0_g1,TRINITY_DN24058_c0_g1,TRINITY_DN26362_c0_g1,TRINITY_DN2689_c0_g1,TRINITY_DN32632_c0_g1,TRINITY_DN32951_c0_g1,TRINITY_DN3381_c0_g1,TRINITY_DN3442_c0_g1,TRINITY_DN3904_c0_g1,TRINITY…	TRINITY_DN1031_c0_g1,TRINITY_DN105499_c0_g1,TRINITY_DN10652_c0_g1,TRINITY_DN111993_c0_g1,TRINITY_DN113026_c0_g1,TRINITY_DN113810_c0_g1,TRINITY_DN114191_c0_g1,TRINITY_DN116827_c0_g1,TRINITY_DN118052_c0_g1,TRINITY_DN12766_c0_g1,TRINITY_DN12766_c0_g2,TRINITY_DN13957_c1_g1,TRINITY_DN13967_c0_g1,TRINITY_DN14281_c1_g1,TRINITY_DN14336_c1_g1,TRINITY_DN14336_c1_g2,TRINITY_DN14486_c0_g1,TRINITY_DN16227_c0_…
BP	GO:0046395	carboxylic acid catabolic process	36	56	92	297	0.00198	0.0588703	TRINITY_DN10563_c0_g1,TRINITY_DN107962_c0_g1,TRINITY_DN1104_c0_g4,TRINITY_DN11342_c0_g1,TRINITY_DN11573_c0_g1,TRINITY_DN12999_c0_g2,TRINITY_DN13574_c0_g1,TRINITY_DN16079_c0_g1,TRINITY_DN17109_c0_g1,TRINITY_DN17899_c0_g1,TRINITY_DN24058_c0_g1,TRINITY_DN26362_c0_g1,TRINITY_DN2689_c0_g1,TRINITY_DN32632_c0_g1,TRINITY_DN32951_c0_g1,TRINITY_DN3381_c0_g1,TRINITY_DN3442_c0_g1,TRINITY_DN3904_c0_g1,TRINITY…	TRINITY_DN1031_c0_g1,TRINITY_DN105499_c0_g1,TRINITY_DN10652_c0_g1,TRINITY_DN111993_c0_g1,TRINITY_DN113026_c0_g1,TRINITY_DN113810_c0_g1,TRINITY_DN114191_c0_g1,TRINITY_DN116827_c0_g1,TRINITY_DN118052_c0_g1,TRINITY_DN12766_c0_g1,TRINITY_DN12766_c0_g2,TRINITY_DN13957_c1_g1,TRINITY_DN13967_c0_g1,TRINITY_DN14281_c1_g1,TRINITY_DN14336_c1_g1,TRINITY_DN14336_c1_g2,TRINITY_DN14486_c0_g1,TRINITY_DN16227_c0_…
BP	GO:0045333	cellular respiration	9	74	83	264	0.00201	0.0595726	TRINITY_DN10043_c0_g1,TRINITY_DN1113_c0_g3,TRINITY_DN120916_c0_g1,TRINITY_DN12224_c0_g1,TRINITY_DN13600_c0_g1,TRINITY_DN17575_c0_g1,TRINITY_DN480_c0_g2,TRINITY_DN690_c0_g2,TRINITY_DN7606_c0_g1	TRINITY_DN101674_c0_g1,TRINITY_DN10169_c0_g1,TRINITY_DN103933_c0_g1,TRINITY_DN106121_c0_g1,TRINITY_DN111266_c0_g1,TRINITY_DN117258_c0_g1,TRINITY_DN120513_c0_g1,TRINITY_DN123668_c0_g1,TRINITY_DN12449_c0_g1,TRINITY_DN13352_c0_g1,TRINITY_DN13373_c0_g2,TRINITY_DN13957_c1_g1,TRINITY_DN14287_c0_g1,TRINITY_DN14709_c0_g1,TRINITY_DN15522_c1_g1,TRINITY_DN16117_c0_g1,TRINITY_DN16643_c0_g1,TRINITY_DN16650_c0…
MF	GO:0016701	oxidoreductase activity, acting on single donors with incorporation of molecular oxygen	12	21	33	86	0.00204	0.0602704	TRINITY_DN103968_c0_g1,TRINITY_DN13034_c0_g1,TRINITY_DN19975_c0_g1,TRINITY_DN2367_c0_g1,TRINITY_DN28551_c0_g1,TRINITY_DN28931_c0_g1,TRINITY_DN31197_c0_g1,TRINITY_DN44294_c0_g2,TRINITY_DN4438_c0_g1,TRINITY_DN7193_c0_g1,TRINITY_DN76292_c0_g1,TRINITY_DN9939_c0_g1	TRINITY_DN10489_c1_g1,TRINITY_DN110712_c0_g1,TRINITY_DN11526_c0_g1,TRINITY_DN116827_c0_g1,TRINITY_DN12766_c0_g1,TRINITY_DN12766_c0_g2,TRINITY_DN14281_c1_g1,TRINITY_DN19951_c0_g1,TRINITY_DN22813_c0_g1,TRINITY_DN22813_c1_g1,TRINITY_DN25356_c0_g1,TRINITY_DN26278_c0_g2,TRINITY_DN26783_c0_g1,TRINITY_DN2810_c2_g1,TRINITY_DN3052_c1_g1,TRINITY_DN34171_c0_g1,TRINITY_DN36121_c0_g1,TRINITY_DN36875_c1_g1,TRI…
BP	GO:0071370	cellular response to gibberellin stimulus	23	17	40	111	0.00206	0.0606693	TRINITY_DN10301_c0_g1,TRINITY_DN10462_c0_g1,TRINITY_DN113081_c0_g1,TRINITY_DN11938_c0_g1,TRINITY_DN13708_c1_g1,TRINITY_DN14351_c0_g1,TRINITY_DN14617_c0_g1,TRINITY_DN16035_c0_g2,TRINITY_DN17540_c0_g1,TRINITY_DN1903_c0_g1,TRINITY_DN19942_c0_g1,TRINITY_DN20298_c0_g1,TRINITY_DN30501_c0_g1,TRINITY_DN40559_c0_g1,TRINITY_DN55905_c0_g1,TRINITY_DN5654_c0_g1,TRINITY_DN6042_c0_g1,TRINITY_DN61132_c0_g1,TRINI…	TRINITY_DN105270_c0_g1,TRINITY_DN10591_c0_g1,TRINITY_DN11302_c0_g2,TRINITY_DN115350_c0_g1,TRINITY_DN12328_c0_g1,TRINITY_DN13588_c0_g1,TRINITY_DN18956_c0_g2,TRINITY_DN21242_c0_g1,TRINITY_DN25231_c0_g1,TRINITY_DN25820_c0_g1,TRINITY_DN3162_c0_g1,TRINITY_DN36200_c0_g1,TRINITY_DN40424_c0_g1,TRINITY_DN4904_c0_g1,TRINITY_DN62815_c0_g1,TRINITY_DN6695_c1_g1,TRINITY_DN7486_c0_g1
BP	GO:0009201	ribonucleoside triphosphate biosynthetic process	13	84	97	316	0.00208	0.0610657	TRINITY_DN11387_c0_g1,TRINITY_DN11424_c0_g1,TRINITY_DN11424_c0_g2,TRINITY_DN15968_c0_g1,TRINITY_DN16711_c0_g1,TRINITY_DN16989_c0_g1,TRINITY_DN18403_c0_g1,TRINITY_DN20713_c0_g1,TRINITY_DN4632_c0_g1,TRINITY_DN480_c0_g2,TRINITY_DN4978_c0_g1,TRINITY_DN61566_c0_g1,TRINITY_DN8791_c0_g1	TRINITY_DN100563_c0_g1,TRINITY_DN104775_c0_g1,TRINITY_DN10625_c0_g1,TRINITY_DN10761_c0_g1,TRINITY_DN107701_c0_g1,TRINITY_DN107707_c0_g1,TRINITY_DN113408_c0_g1,TRINITY_DN11577_c0_g1,TRINITY_DN116721_c0_g1,TRINITY_DN116881_c0_g1,TRINITY_DN118773_c0_g1,TRINITY_DN12336_c0_g1,TRINITY_DN12676_c0_g1,TRINITY_DN13293_c0_g1,TRINITY_DN13640_c0_g1,TRINITY_DN13783_c0_g2,TRINITY_DN13961_c0_g1,TRINITY_DN15111_c…
BP	GO:0006164	purine nucleotide biosynthetic process	21	106	127	429	0.00216	0.0632155	TRINITY_DN11387_c0_g1,TRINITY_DN11415_c0_g1,TRINITY_DN11424_c0_g1,TRINITY_DN11424_c0_g2,TRINITY_DN12595_c0_g1,TRINITY_DN15968_c0_g1,TRINITY_DN16711_c0_g1,TRINITY_DN17872_c0_g1,TRINITY_DN18403_c0_g1,TRINITY_DN20713_c0_g1,TRINITY_DN20717_c0_g2,TRINITY_DN3274_c0_g1,TRINITY_DN3797_c0_g2,TRINITY_DN4133_c0_g1,TRINITY_DN4632_c0_g1,TRINITY_DN480_c0_g2,TRINITY_DN4978_c0_g1,TRINITY_DN5076_c0_g1,TRINITY_DN5…	TRINITY_DN100563_c0_g1,TRINITY_DN10425_c1_g1,TRINITY_DN104775_c0_g1,TRINITY_DN10625_c0_g1,TRINITY_DN10761_c0_g1,TRINITY_DN107701_c0_g1,TRINITY_DN107707_c0_g1,TRINITY_DN109180_c0_g1,TRINITY_DN113408_c0_g1,TRINITY_DN11577_c0_g1,TRINITY_DN116721_c0_g1,TRINITY_DN116881_c0_g1,TRINITY_DN118773_c0_g1,TRINITY_DN12336_c0_g1,TRINITY_DN12676_c0_g1,TRINITY_DN13293_c0_g1,TRINITY_DN13640_c0_g1,TRINITY_DN13783_…
BP	GO:0010345	suberin biosynthetic process	1	20	21	49	0.0022	0.064185	TRINITY_DN25383_c0_g1	TRINITY_DN10012_c0_g1,TRINITY_DN11871_c0_g1,TRINITY_DN12747_c0_g1,TRINITY_DN14256_c0_g1,TRINITY_DN15_c2_g1,TRINITY_DN17917_c0_g1,TRINITY_DN18607_c0_g1,TRINITY_DN21181_c0_g1,TRINITY_DN23180_c0_g1,TRINITY_DN2475_c0_g1,TRINITY_DN2475_c0_g2,TRINITY_DN2607_c0_g1,TRINITY_DN2608_c0_g1,TRINITY_DN2608_c0_g2,TRINITY_DN39319_c0_g1,TRINITY_DN5212_c0_g1,TRINITY_DN59168_c0_g1,TRINITY_DN73564_c0_g2,TRINITY_DN73…
BP	GO:0001505	regulation of neurotransmitter levels	15	33	48	139	0.00221	0.0642759	TRINITY_DN10978_c0_g2,TRINITY_DN11700_c0_g1,TRINITY_DN13574_c0_g1,TRINITY_DN17899_c0_g1,TRINITY_DN18933_c0_g1,TRINITY_DN19195_c0_g1,TRINITY_DN23377_c0_g1,TRINITY_DN27891_c0_g1,TRINITY_DN3110_c0_g1,TRINITY_DN4148_c0_g1,TRINITY_DN44473_c0_g1,TRINITY_DN44473_c0_g2,TRINITY_DN7435_c0_g1,TRINITY_DN8035_c0_g1,TRINITY_DN8318_c0_g1	TRINITY_DN107841_c0_g1,TRINITY_DN11038_c0_g1,TRINITY_DN114002_c0_g1,TRINITY_DN11402_c0_g1,TRINITY_DN11791_c0_g1,TRINITY_DN14996_c0_g1,TRINITY_DN16893_c0_g1,TRINITY_DN19162_c0_g1,TRINITY_DN22759_c0_g1,TRINITY_DN23704_c0_g3,TRINITY_DN25366_c0_g1,TRINITY_DN26364_c0_g1,TRINITY_DN27818_c0_g1,TRINITY_DN28037_c0_g1,TRINITY_DN29813_c0_g2,TRINITY_DN30499_c0_g1,TRINITY_DN32112_c0_g2,TRINITY_DN34410_c0_g1,T…
BP	GO:0031125	rRNA 3'-end processing	0	19	19	43	0.0023	0.0666857	-	TRINITY_DN100883_c0_g1,TRINITY_DN112713_c0_g1,TRINITY_DN113861_c0_g1,TRINITY_DN116671_c0_g1,TRINITY_DN117275_c0_g1,TRINITY_DN15359_c0_g1,TRINITY_DN16023_c0_g1,TRINITY_DN16518_c0_g1,TRINITY_DN23073_c0_g1,TRINITY_DN23073_c0_g2,TRINITY_DN23073_c1_g1,TRINITY_DN24828_c0_g1,TRINITY_DN26415_c0_g1,TRINITY_DN26612_c0_g1,TRINITY_DN29079_c0_g1,TRINITY_DN34864_c0_g1,TRINITY_DN45134_c0_g1,TRINITY_DN45134_c2_g…
BP	GO:0034050	host programmed cell death induced by symbiont	12	50	62	189	0.00235	0.0679245	TRINITY_DN103505_c0_g1,TRINITY_DN116356_c0_g1,TRINITY_DN13095_c0_g2,TRINITY_DN14214_c0_g1,TRINITY_DN14214_c0_g2,TRINITY_DN3246_c0_g1,TRINITY_DN33782_c0_g1,TRINITY_DN4485_c0_g1,TRINITY_DN5598_c1_g2,TRINITY_DN7707_c0_g1,TRINITY_DN8014_c2_g1,TRINITY_DN8237_c0_g1	TRINITY_DN100389_c0_g1,TRINITY_DN100951_c0_g1,TRINITY_DN103491_c0_g1,TRINITY_DN112199_c0_g1,TRINITY_DN12645_c0_g1,TRINITY_DN12766_c0_g1,TRINITY_DN12766_c0_g2,TRINITY_DN13540_c1_g1,TRINITY_DN13823_c0_g1,TRINITY_DN13823_c0_g2,TRINITY_DN14092_c1_g1,TRINITY_DN16381_c0_g1,TRINITY_DN16643_c0_g1,TRINITY_DN17795_c0_g1,TRINITY_DN17882_c0_g1,TRINITY_DN18075_c0_g1,TRINITY_DN1823_c0_g1,TRINITY_DN18485_c0_g1,…
BP	GO:0009740	gibberellic acid mediated signaling pathway	22	16	38	105	0.0024	0.0688815	TRINITY_DN10301_c0_g1,TRINITY_DN10462_c0_g1,TRINITY_DN113081_c0_g1,TRINITY_DN13708_c1_g1,TRINITY_DN14351_c0_g1,TRINITY_DN14617_c0_g1,TRINITY_DN16035_c0_g2,TRINITY_DN17540_c0_g1,TRINITY_DN1903_c0_g1,TRINITY_DN19942_c0_g1,TRINITY_DN20298_c0_g1,TRINITY_DN30501_c0_g1,TRINITY_DN40559_c0_g1,TRINITY_DN55905_c0_g1,TRINITY_DN5654_c0_g1,TRINITY_DN6042_c0_g1,TRINITY_DN61132_c0_g1,TRINITY_DN7479_c0_g1,TRINIT…	TRINITY_DN10591_c0_g1,TRINITY_DN11302_c0_g2,TRINITY_DN115350_c0_g1,TRINITY_DN12328_c0_g1,TRINITY_DN13588_c0_g1,TRINITY_DN18956_c0_g2,TRINITY_DN21242_c0_g1,TRINITY_DN25231_c0_g1,TRINITY_DN25820_c0_g1,TRINITY_DN3162_c0_g1,TRINITY_DN36200_c0_g1,TRINITY_DN40424_c0_g1,TRINITY_DN4904_c0_g1,TRINITY_DN62815_c0_g1,TRINITY_DN6695_c1_g1,TRINITY_DN7486_c0_g1
BP	GO:0010438	cellular response to sulfur starvation	6	1	7	10	0.00242	0.0688815	TRINITY_DN110770_c0_g1,TRINITY_DN3666_c0_g1,TRINITY_DN506_c0_g3,TRINITY_DN6470_c1_g1,TRINITY_DN6470_c1_g2,TRINITY_DN6967_c0_g1	TRINITY_DN31711_c0_g1
BP	GO:0016079	synaptic vesicle exocytosis	3	4	7	10	0.00242	0.0688815	TRINITY_DN11700_c0_g1,TRINITY_DN19195_c0_g1,TRINITY_DN8035_c0_g1	TRINITY_DN11402_c0_g1,TRINITY_DN47328_c0_g1,TRINITY_DN61845_c0_g1,TRINITY_DN948_c4_g1
BP	GO:0017156	calcium-ion regulated exocytosis	3	4	7	10	0.00242	0.0688815	TRINITY_DN11700_c0_g1,TRINITY_DN19195_c0_g1,TRINITY_DN8035_c0_g1	TRINITY_DN11402_c0_g1,TRINITY_DN47328_c0_g1,TRINITY_DN61845_c0_g1,TRINITY_DN948_c4_g1
BP	GO:1900378	positive regulation of secondary metabolite biosynthetic process	4	3	7	10	0.00242	0.0688815	TRINITY_DN15640_c0_g1,TRINITY_DN3060_c0_g4,TRINITY_DN8700_c0_g1,TRINITY_DN8700_c1_g1	TRINITY_DN4051_c0_g1,TRINITY_DN4051_c0_g2,TRINITY_DN4164_c0_g2
BP	GO:0022618	ribonucleoprotein complex assembly	2	124	126	427	0.00254	0.0720773	TRINITY_DN35464_c0_g1,TRINITY_DN8617_c0_g1	TRINITY_DN100728_c0_g1,TRINITY_DN100883_c0_g1,TRINITY_DN101058_c0_g1,TRINITY_DN101686_c0_g1,TRINITY_DN102475_c0_g1,TRINITY_DN104627_c0_g1,TRINITY_DN106063_c0_g1,TRINITY_DN106215_c0_g1,TRINITY_DN106752_c0_g1,TRINITY_DN10815_c0_g3,TRINITY_DN108615_c0_g1,TRINITY_DN108639_c0_g1,TRINITY_DN109069_c0_g1,TRINITY_DN112025_c0_g1,TRINITY_DN113588_c0_g1,TRINITY_DN113657_c0_g1,TRINITY_DN114211_c0_g1,TRINITY_D…
BP	GO:0030001	metal ion transport	53	108	161	561	0.00258	0.0729905	TRINITY_DN10534_c0_g1,TRINITY_DN10918_c0_g1,TRINITY_DN112480_c0_g1,TRINITY_DN11382_c0_g1,TRINITY_DN11519_c0_g1,TRINITY_DN11988_c0_g1,TRINITY_DN11997_c0_g1,TRINITY_DN12200_c0_g2,TRINITY_DN122658_c0_g1,TRINITY_DN12484_c0_g1,TRINITY_DN1299_c0_g2,TRINITY_DN13040_c0_g1,TRINITY_DN13315_c0_g1,TRINITY_DN13593_c0_g1,TRINITY_DN13916_c0_g1,TRINITY_DN1546_c2_g1,TRINITY_DN1578_c0_g1,TRINITY_DN1779_c0_g1,TRINI…	TRINITY_DN10229_c0_g1,TRINITY_DN103925_c0_g1,TRINITY_DN104775_c0_g1,TRINITY_DN11499_c0_g1,TRINITY_DN11556_c0_g1,TRINITY_DN116465_c0_g1,TRINITY_DN1169_c0_g1,TRINITY_DN1169_c0_g2,TRINITY_DN11790_c0_g1,TRINITY_DN11940_c0_g1,TRINITY_DN11989_c0_g2,TRINITY_DN12066_c0_g1,TRINITY_DN123725_c0_g1,TRINITY_DN12785_c0_g1,TRINITY_DN12785_c0_g2,TRINITY_DN1318_c0_g1,TRINITY_DN13225_c0_g1,TRINITY_DN13437_c0_g1,TR…
BP	GO:2001057	reactive nitrogen species metabolic process	6	25	31	82	0.00269	0.0752993	TRINITY_DN10895_c0_g1,TRINITY_DN16716_c0_g1,TRINITY_DN26223_c0_g1,TRINITY_DN7588_c0_g1,TRINITY_DN8217_c0_g1,TRINITY_DN8318_c0_g1	TRINITY_DN10994_c0_g1,TRINITY_DN114002_c0_g1,TRINITY_DN16898_c0_g1,TRINITY_DN18440_c0_g1,TRINITY_DN19162_c0_g1,TRINITY_DN19167_c1_g1,TRINITY_DN22046_c0_g2,TRINITY_DN23519_c0_g1,TRINITY_DN23704_c0_g3,TRINITY_DN2692_c0_g1,TRINITY_DN289_c0_g1,TRINITY_DN36941_c0_g1,TRINITY_DN3970_c0_g1,TRINITY_DN3970_c1_g1,TRINITY_DN3970_c1_g2,TRINITY_DN42739_c0_g1,TRINITY_DN4641_c0_g1,TRINITY_DN5154_c0_g1,TRINITY_DN…
MF	GO:0009815	1-aminocyclopropane-1-carboxylate oxidase activity	3	4	7	10	0.00271	0.0752993	TRINITY_DN120433_c0_g1,TRINITY_DN5168_c0_g1,TRINITY_DN7310_c2_g3	TRINITY_DN11293_c0_g1,TRINITY_DN15922_c0_g1,TRINITY_DN4602_c0_g1,TRINITY_DN7310_c0_g1
MF	GO:0080079	cellobiose glucosidase activity	4	3	7	10	0.00271	0.0752993	TRINITY_DN15944_c0_g1,TRINITY_DN1940_c0_g1,TRINITY_DN6970_c0_g1,TRINITY_DN90251_c0_g1	TRINITY_DN17401_c0_g1,TRINITY_DN27506_c0_g3,TRINITY_DN29497_c0_g3
BP	GO:0030002	cellular anion homeostasis	0	9	9	15	0.00271	0.0752993	-	TRINITY_DN100489_c0_g1,TRINITY_DN103891_c0_g1,TRINITY_DN107924_c0_g1,TRINITY_DN17815_c0_g1,TRINITY_DN22301_c0_g1,TRINITY_DN36426_c0_g1,TRINITY_DN44362_c0_g1,TRINITY_DN51551_c0_g1,TRINITY_DN58432_c0_g1
BP	GO:0030320	cellular monovalent inorganic anion homeostasis	0	9	9	15	0.00271	0.0752993	-	TRINITY_DN100489_c0_g1,TRINITY_DN103891_c0_g1,TRINITY_DN107924_c0_g1,TRINITY_DN17815_c0_g1,TRINITY_DN22301_c0_g1,TRINITY_DN36426_c0_g1,TRINITY_DN44362_c0_g1,TRINITY_DN51551_c0_g1,TRINITY_DN58432_c0_g1
BP	GO:0046351	disaccharide biosynthetic process	12	11	23	56	0.00271	0.0752993	TRINITY_DN11080_c1_g1,TRINITY_DN11701_c0_g1,TRINITY_DN12293_c0_g1,TRINITY_DN12594_c0_g1,TRINITY_DN13814_c0_g1,TRINITY_DN16748_c0_g1,TRINITY_DN1916_c1_g1,TRINITY_DN25370_c0_g1,TRINITY_DN3312_c0_g1,TRINITY_DN3312_c1_g1,TRINITY_DN3556_c0_g1,TRINITY_DN7965_c0_g1	TRINITY_DN14923_c0_g1,TRINITY_DN16077_c0_g1,TRINITY_DN2614_c0_g2,TRINITY_DN30078_c0_g1,TRINITY_DN5009_c0_g1,TRINITY_DN5534_c0_g1,TRINITY_DN5684_c0_g2,TRINITY_DN7242_c0_g1,TRINITY_DN8435_c1_g1,TRINITY_DN8797_c0_g1,TRINITY_DN8797_c0_g2
MF	GO:0008324	cation transmembrane transporter activity	47	159	206	724	0.00275	0.076184	TRINITY_DN103517_c0_g1,TRINITY_DN10918_c0_g1,TRINITY_DN11059_c0_g1,TRINITY_DN112480_c0_g1,TRINITY_DN11387_c0_g1,TRINITY_DN1179_c0_g2,TRINITY_DN11988_c0_g1,TRINITY_DN11997_c0_g1,TRINITY_DN120916_c0_g1,TRINITY_DN122658_c0_g1,TRINITY_DN12484_c0_g1,TRINITY_DN12970_c0_g1,TRINITY_DN1299_c0_g2,TRINITY_DN13916_c0_g1,TRINITY_DN1546_c2_g1,TRINITY_DN1578_c0_g1,TRINITY_DN16551_c1_g1,TRINITY_DN1779_c0_g1,TRIN…	TRINITY_DN101214_c0_g1,TRINITY_DN101674_c0_g1,TRINITY_DN10368_c0_g1,TRINITY_DN1038_c0_g1,TRINITY_DN104516_c0_g1,TRINITY_DN104909_c0_g1,TRINITY_DN107701_c0_g1,TRINITY_DN11072_c0_g1,TRINITY_DN113365_c0_g1,TRINITY_DN113408_c0_g1,TRINITY_DN11499_c0_g1,TRINITY_DN11556_c0_g1,TRINITY_DN116465_c0_g1,TRINITY_DN1169_c0_g1,TRINITY_DN1169_c0_g2,TRINITY_DN117598_c0_g1,TRINITY_DN117742_c0_g1,TRINITY_DN11790_c0…
BP	GO:0071214	cellular response to abiotic stimulus	52	74	126	428	0.00278	0.0765607	TRINITY_DN10301_c0_g1,TRINITY_DN103505_c0_g1,TRINITY_DN10462_c0_g1,TRINITY_DN10917_c0_g1,TRINITY_DN111968_c0_g1,TRINITY_DN112157_c0_g1,TRINITY_DN116417_c0_g1,TRINITY_DN12003_c0_g1,TRINITY_DN12408_c0_g1,TRINITY_DN12679_c0_g1,TRINITY_DN13151_c0_g1,TRINITY_DN1339_c0_g1,TRINITY_DN1339_c0_g2,TRINITY_DN13408_c0_g1,TRINITY_DN13408_c0_g2,TRINITY_DN1409_c0_g1,TRINITY_DN14351_c0_g1,TRINITY_DN16830_c0_g1,TR…	TRINITY_DN10142_c0_g1,TRINITY_DN101686_c0_g1,TRINITY_DN103938_c0_g1,TRINITY_DN1065_c0_g1,TRINITY_DN111059_c0_g1,TRINITY_DN112146_c0_g1,TRINITY_DN112785_c0_g1,TRINITY_DN11302_c0_g2,TRINITY_DN11383_c0_g1,TRINITY_DN114100_c0_g1,TRINITY_DN11525_c0_g1,TRINITY_DN116291_c0_g1,TRINITY_DN11971_c0_g1,TRINITY_DN11989_c0_g2,TRINITY_DN121430_c0_g1,TRINITY_DN123023_c0_g1,TRINITY_DN130_c0_g3,TRINITY_DN14247_c0_…
BP	GO:0104004	cellular response to environmental stimulus	52	74	126	428	0.00278	0.0765607	TRINITY_DN10301_c0_g1,TRINITY_DN103505_c0_g1,TRINITY_DN10462_c0_g1,TRINITY_DN10917_c0_g1,TRINITY_DN111968_c0_g1,TRINITY_DN112157_c0_g1,TRINITY_DN116417_c0_g1,TRINITY_DN12003_c0_g1,TRINITY_DN12408_c0_g1,TRINITY_DN12679_c0_g1,TRINITY_DN13151_c0_g1,TRINITY_DN1339_c0_g1,TRINITY_DN1339_c0_g2,TRINITY_DN13408_c0_g1,TRINITY_DN13408_c0_g2,TRINITY_DN1409_c0_g1,TRINITY_DN14351_c0_g1,TRINITY_DN16830_c0_g1,TR…	TRINITY_DN10142_c0_g1,TRINITY_DN101686_c0_g1,TRINITY_DN103938_c0_g1,TRINITY_DN1065_c0_g1,TRINITY_DN111059_c0_g1,TRINITY_DN112146_c0_g1,TRINITY_DN112785_c0_g1,TRINITY_DN11302_c0_g2,TRINITY_DN11383_c0_g1,TRINITY_DN114100_c0_g1,TRINITY_DN11525_c0_g1,TRINITY_DN116291_c0_g1,TRINITY_DN11971_c0_g1,TRINITY_DN11989_c0_g2,TRINITY_DN121430_c0_g1,TRINITY_DN123023_c0_g1,TRINITY_DN130_c0_g3,TRINITY_DN14247_c0_…
CC	GO:0009517	PSII associated light-harvesting complex II	5	1	6	8	0.00293	0.080333	TRINITY_DN13120_c0_g1,TRINITY_DN19123_c0_g1,TRINITY_DN6261_c0_g1,TRINITY_DN7923_c0_g1,TRINITY_DN8854_c0_g1	TRINITY_DN25896_c0_g1
BP	GO:0009626	plant-type hypersensitive response	12	49	61	187	0.00294	0.080333	TRINITY_DN103505_c0_g1,TRINITY_DN116356_c0_g1,TRINITY_DN13095_c0_g2,TRINITY_DN14214_c0_g1,TRINITY_DN14214_c0_g2,TRINITY_DN3246_c0_g1,TRINITY_DN33782_c0_g1,TRINITY_DN4485_c0_g1,TRINITY_DN5598_c1_g2,TRINITY_DN7707_c0_g1,TRINITY_DN8014_c2_g1,TRINITY_DN8237_c0_g1	TRINITY_DN100389_c0_g1,TRINITY_DN100951_c0_g1,TRINITY_DN103491_c0_g1,TRINITY_DN112199_c0_g1,TRINITY_DN12645_c0_g1,TRINITY_DN12766_c0_g1,TRINITY_DN12766_c0_g2,TRINITY_DN13540_c1_g1,TRINITY_DN13823_c0_g1,TRINITY_DN13823_c0_g2,TRINITY_DN14092_c1_g1,TRINITY_DN16381_c0_g1,TRINITY_DN16643_c0_g1,TRINITY_DN17795_c0_g1,TRINITY_DN17882_c0_g1,TRINITY_DN18075_c0_g1,TRINITY_DN1823_c0_g1,TRINITY_DN18485_c0_g1,…
BP	GO:0000479	endonucleolytic cleavage of tricistronic rRNA transcript (SSU-rRNA, 5.8S rRNA, LSU-rRNA)	0	21	21	50	0.00295	0.080333	-	TRINITY_DN100883_c0_g1,TRINITY_DN112713_c0_g1,TRINITY_DN113861_c0_g1,TRINITY_DN116373_c0_g1,TRINITY_DN116671_c0_g1,TRINITY_DN117275_c0_g1,TRINITY_DN15359_c0_g1,TRINITY_DN15384_c0_g1,TRINITY_DN16023_c0_g1,TRINITY_DN16518_c0_g1,TRINITY_DN23073_c0_g1,TRINITY_DN23073_c0_g2,TRINITY_DN23073_c1_g1,TRINITY_DN24828_c0_g1,TRINITY_DN26415_c0_g1,TRINITY_DN26612_c0_g1,TRINITY_DN29079_c0_g1,TRINITY_DN34864_c0_…
MF	GO:0003924	GTPase activity	7	125	132	444	0.00296	0.080333	TRINITY_DN10951_c1_g3,TRINITY_DN18415_c0_g1,TRINITY_DN3903_c0_g1,TRINITY_DN7202_c0_g1,TRINITY_DN7976_c0_g1,TRINITY_DN899_c0_g2,TRINITY_DN954_c1_g2	TRINITY_DN10031_c1_g1,TRINITY_DN10275_c2_g2,TRINITY_DN104016_c0_g1,TRINITY_DN104038_c0_g1,TRINITY_DN10632_c0_g1,TRINITY_DN107883_c0_g1,TRINITY_DN108354_c0_g1,TRINITY_DN10905_c1_g1,TRINITY_DN109368_c0_g1,TRINITY_DN111979_c0_g1,TRINITY_DN112850_c0_g1,TRINITY_DN112911_c0_g1,TRINITY_DN11302_c0_g2,TRINITY_DN11385_c0_g1,TRINITY_DN11385_c1_g1,TRINITY_DN115230_c0_g1,TRINITY_DN11523_c0_g1,TRINITY_DN11523_…
CC	GO:0009514	glyoxysome	6	25	31	83	0.00296	0.080333	TRINITY_DN12224_c0_g1,TRINITY_DN12999_c0_g2,TRINITY_DN17575_c0_g1,TRINITY_DN690_c0_g2,TRINITY_DN6978_c0_g1,TRINITY_DN9048_c0_g2	TRINITY_DN105499_c0_g1,TRINITY_DN106121_c0_g1,TRINITY_DN114191_c0_g1,TRINITY_DN13957_c1_g1,TRINITY_DN13967_c0_g1,TRINITY_DN16894_c0_g1,TRINITY_DN18044_c0_g1,TRINITY_DN19958_c0_g2,TRINITY_DN20422_c0_g1,TRINITY_DN20574_c0_g2,TRINITY_DN23447_c0_g3,TRINITY_DN25927_c0_g2,TRINITY_DN30279_c0_g1,TRINITY_DN30457_c0_g1,TRINITY_DN30457_c0_g3,TRINITY_DN39527_c0_g1,TRINITY_DN45040_c0_g2,TRINITY_DN55484_c0_g1,…
BP	GO:0003032	detection of oxygen	0	6	6	8	0.00305	0.0820599	-	TRINITY_DN10489_c1_g1,TRINITY_DN12010_c0_g1,TRINITY_DN17937_c0_g1,TRINITY_DN2810_c2_g1,TRINITY_DN31594_c0_g1,TRINITY_DN549_c1_g1
BP	GO:0010275	NAD(P)H dehydrogenase complex assembly	5	1	6	8	0.00305	0.0820599	TRINITY_DN20636_c0_g1,TRINITY_DN27906_c0_g1,TRINITY_DN31354_c0_g1,TRINITY_DN8860_c0_g1,TRINITY_DN9443_c0_g1	TRINITY_DN6032_c0_g1
BP	GO:0070483	detection of hypoxia	0	6	6	8	0.00305	0.0820599	-	TRINITY_DN10489_c1_g1,TRINITY_DN12010_c0_g1,TRINITY_DN17937_c0_g1,TRINITY_DN2810_c2_g1,TRINITY_DN31594_c0_g1,TRINITY_DN549_c1_g1
BP	GO:0007263	nitric oxide mediated signal transduction	2	2	4	4	0.00308	0.0821568	TRINITY_DN33782_c0_g1,TRINITY_DN8237_c0_g1	TRINITY_DN18138_c0_g1,TRINITY_DN5738_c1_g1
BP	GO:0010040	response to iron(II) ion	3	1	4	4	0.00308	0.0821568	TRINITY_DN15944_c0_g1,TRINITY_DN6970_c0_g1,TRINITY_DN90251_c0_g1	TRINITY_DN17401_c0_g1
BP	GO:0010258	NADH dehydrogenase complex (plastoquinone) assembly	4	0	4	4	0.00308	0.0821568	TRINITY_DN20636_c0_g1,TRINITY_DN27906_c0_g1,TRINITY_DN31354_c0_g1,TRINITY_DN8860_c0_g1	-
MF	GO:0016679	oxidoreductase activity, acting on diphenols and related substances as donors	8	17	25	62	0.00315	0.0837846	TRINITY_DN12993_c0_g1,TRINITY_DN15409_c0_g1,TRINITY_DN26635_c0_g1,TRINITY_DN27179_c0_g1,TRINITY_DN27179_c0_g2,TRINITY_DN31702_c0_g1,TRINITY_DN4833_c0_g1,TRINITY_DN77585_c0_g1	TRINITY_DN120513_c0_g1,TRINITY_DN13228_c0_g1,TRINITY_DN14117_c0_g1,TRINITY_DN15019_c0_g1,TRINITY_DN15019_c0_g2,TRINITY_DN1919_c0_g2,TRINITY_DN19508_c0_g2,TRINITY_DN19812_c0_g1,TRINITY_DN22549_c0_g1,TRINITY_DN27179_c0_g3,TRINITY_DN38071_c0_g1,TRINITY_DN4220_c0_g2,TRINITY_DN5006_c0_g1,TRINITY_DN8028_c0_g1,TRINITY_DN908_c0_g1,TRINITY_DN9346_c0_g1,TRINITY_DN9693_c0_g1
BP	GO:0006085	acetyl-CoA biosynthetic process	0	18	18	41	0.00323	0.0854257	-	TRINITY_DN107707_c0_g1,TRINITY_DN13783_c0_g2,TRINITY_DN25314_c0_g2,TRINITY_DN27667_c0_g1,TRINITY_DN30457_c0_g1,TRINITY_DN30457_c0_g3,TRINITY_DN35968_c0_g2,TRINITY_DN36512_c1_g1,TRINITY_DN38016_c0_g1,TRINITY_DN56822_c0_g1,TRINITY_DN58476_c0_g1,TRINITY_DN58476_c1_g1,TRINITY_DN58476_c1_g2,TRINITY_DN58555_c0_g1,TRINITY_DN6369_c0_g1,TRINITY_DN72850_c0_g1,TRINITY_DN8291_c0_g1,TRINITY_DN8571_c0_g1
BP	GO:0006097	glyoxylate cycle	4	14	18	41	0.00323	0.0854257	TRINITY_DN12224_c0_g1,TRINITY_DN17575_c0_g1,TRINITY_DN690_c0_g2,TRINITY_DN7606_c0_g1	TRINITY_DN106121_c0_g1,TRINITY_DN123668_c0_g1,TRINITY_DN13957_c1_g1,TRINITY_DN16894_c0_g1,TRINITY_DN18044_c0_g1,TRINITY_DN20422_c0_g1,TRINITY_DN20574_c0_g2,TRINITY_DN30279_c0_g1,TRINITY_DN39527_c0_g1,TRINITY_DN41354_c0_g1,TRINITY_DN56642_c0_g1,TRINITY_DN60976_c0_g1,TRINITY_DN9587_c0_g1,TRINITY_DN97387_c1_g1
BP	GO:0044409	entry into host	1	16	17	38	0.00328	0.0862793	TRINITY_DN11700_c0_g1	TRINITY_DN103536_c0_g1,TRINITY_DN103565_c0_g1,TRINITY_DN112390_c0_g1,TRINITY_DN116216_c0_g1,TRINITY_DN121696_c0_g1,TRINITY_DN13893_c0_g1,TRINITY_DN17348_c0_g1,TRINITY_DN17348_c1_g3,TRINITY_DN18669_c0_g1,TRINITY_DN21326_c0_g2,TRINITY_DN22328_c0_g1,TRINITY_DN25134_c1_g1,TRINITY_DN28856_c1_g1,TRINITY_DN34008_c0_g1,TRINITY_DN37388_c0_g1,TRINITY_DN46970_c0_g1
BP	GO:1905156	negative regulation of photosynthesis	5	11	16	35	0.00329	0.0862793	TRINITY_DN10681_c0_g1,TRINITY_DN2651_c0_g1,TRINITY_DN3201_c0_g1,TRINITY_DN651_c0_g1,TRINITY_DN8596_c0_g1	TRINITY_DN100955_c0_g1,TRINITY_DN11250_c0_g1,TRINITY_DN12219_c0_g1,TRINITY_DN13381_c0_g3,TRINITY_DN17802_c0_g1,TRINITY_DN25349_c0_g3,TRINITY_DN27039_c0_g1,TRINITY_DN37071_c0_g1,TRINITY_DN45525_c0_g1,TRINITY_DN51659_c0_g2,TRINITY_DN51659_c1_g1
BP	GO:0050801	ion homeostasis	34	97	131	449	0.00329	0.0862793	TRINITY_DN10301_c0_g1,TRINITY_DN10534_c0_g1,TRINITY_DN10918_c0_g1,TRINITY_DN109967_c0_g1,TRINITY_DN11262_c0_g1,TRINITY_DN11382_c0_g1,TRINITY_DN12200_c0_g2,TRINITY_DN12572_c0_g1,TRINITY_DN13916_c0_g1,TRINITY_DN14920_c0_g1,TRINITY_DN15097_c0_g1,TRINITY_DN15850_c0_g1,TRINITY_DN1596_c0_g1,TRINITY_DN1779_c0_g1,TRINITY_DN2054_c0_g1,TRINITY_DN2125_c0_g2,TRINITY_DN22940_c0_g1,TRINITY_DN24472_c0_g1,TRINIT…	TRINITY_DN100009_c0_g1,TRINITY_DN100489_c0_g1,TRINITY_DN101214_c0_g1,TRINITY_DN10229_c0_g1,TRINITY_DN103891_c0_g1,TRINITY_DN104775_c0_g1,TRINITY_DN107924_c0_g1,TRINITY_DN116465_c0_g1,TRINITY_DN117742_c0_g1,TRINITY_DN12066_c0_g1,TRINITY_DN123064_c0_g1,TRINITY_DN123725_c0_g1,TRINITY_DN12785_c0_g1,TRINITY_DN12785_c0_g2,TRINITY_DN1318_c0_g1,TRINITY_DN13225_c0_g1,TRINITY_DN13640_c0_g1,TRINITY_DN14366_…
MF	GO:0000016	lactase activity	3	1	4	4	0.00331	0.0863189	TRINITY_DN15944_c0_g1,TRINITY_DN6970_c0_g1,TRINITY_DN90251_c0_g1	TRINITY_DN17401_c0_g1
MF	GO:0017042	glycosylceramidase activity	3	1	4	4	0.00331	0.0863189	TRINITY_DN15944_c0_g1,TRINITY_DN6970_c0_g1,TRINITY_DN90251_c0_g1	TRINITY_DN17401_c0_g1
MF	GO:0022890	inorganic cation transmembrane transporter activity	45	148	193	677	0.00335	0.0864349	TRINITY_DN103517_c0_g1,TRINITY_DN10918_c0_g1,TRINITY_DN11059_c0_g1,TRINITY_DN112480_c0_g1,TRINITY_DN11387_c0_g1,TRINITY_DN1179_c0_g2,TRINITY_DN11988_c0_g1,TRINITY_DN11997_c0_g1,TRINITY_DN120916_c0_g1,TRINITY_DN122658_c0_g1,TRINITY_DN12484_c0_g1,TRINITY_DN12970_c0_g1,TRINITY_DN1299_c0_g2,TRINITY_DN13916_c0_g1,TRINITY_DN1546_c2_g1,TRINITY_DN1578_c0_g1,TRINITY_DN16551_c1_g1,TRINITY_DN1779_c0_g1,TRIN…	TRINITY_DN101214_c0_g1,TRINITY_DN101674_c0_g1,TRINITY_DN10368_c0_g1,TRINITY_DN1038_c0_g1,TRINITY_DN104516_c0_g1,TRINITY_DN104909_c0_g1,TRINITY_DN107701_c0_g1,TRINITY_DN11072_c0_g1,TRINITY_DN113365_c0_g1,TRINITY_DN113408_c0_g1,TRINITY_DN11499_c0_g1,TRINITY_DN11556_c0_g1,TRINITY_DN116465_c0_g1,TRINITY_DN1169_c0_g1,TRINITY_DN1169_c0_g2,TRINITY_DN117598_c0_g1,TRINITY_DN117742_c0_g1,TRINITY_DN11790_c0…
MF	GO:0033897	ribonuclease T2 activity	2	4	6	8	0.00336	0.0864349	TRINITY_DN79375_c0_g1,TRINITY_DN8233_c0_g1	TRINITY_DN16315_c0_g1,TRINITY_DN39363_c0_g2,TRINITY_DN45536_c0_g1,TRINITY_DN85012_c0_g1
MF	GO:0061634	alpha-D-xyloside xylohydrolase	1	5	6	8	0.00336	0.0864349	TRINITY_DN2971_c0_g1	TRINITY_DN24311_c0_g1,TRINITY_DN28709_c0_g2,TRINITY_DN28709_c0_g4,TRINITY_DN28709_c0_g5,TRINITY_DN87344_c0_g1
MF	GO:0080176	xyloglucan 1,6-alpha-xylosidase activity	1	5	6	8	0.00336	0.0864349	TRINITY_DN2971_c0_g1	TRINITY_DN24311_c0_g1,TRINITY_DN28709_c0_g2,TRINITY_DN28709_c0_g4,TRINITY_DN28709_c0_g5,TRINITY_DN87344_c0_g1
BP	GO:0009126	purine nucleoside monophosphate metabolic process	17	105	122	415	0.00337	0.0864349	TRINITY_DN11387_c0_g1,TRINITY_DN11424_c0_g1,TRINITY_DN11424_c0_g2,TRINITY_DN12595_c0_g1,TRINITY_DN15968_c0_g1,TRINITY_DN16711_c0_g1,TRINITY_DN18403_c0_g1,TRINITY_DN20713_c0_g1,TRINITY_DN3274_c0_g1,TRINITY_DN4133_c0_g1,TRINITY_DN4632_c0_g1,TRINITY_DN480_c0_g2,TRINITY_DN4978_c0_g1,TRINITY_DN5076_c0_g1,TRINITY_DN5414_c0_g1,TRINITY_DN61566_c0_g1,TRINITY_DN8791_c0_g1	TRINITY_DN100563_c0_g1,TRINITY_DN101674_c0_g1,TRINITY_DN104775_c0_g1,TRINITY_DN10761_c0_g1,TRINITY_DN107701_c0_g1,TRINITY_DN107707_c0_g1,TRINITY_DN109180_c0_g1,TRINITY_DN113408_c0_g1,TRINITY_DN11577_c0_g1,TRINITY_DN116721_c0_g1,TRINITY_DN116881_c0_g1,TRINITY_DN117258_c0_g1,TRINITY_DN118773_c0_g1,TRINITY_DN120513_c0_g1,TRINITY_DN12336_c0_g1,TRINITY_DN12676_c0_g1,TRINITY_DN13293_c0_g1,TRINITY_DN136…
BP	GO:0009167	purine ribonucleoside monophosphate metabolic process	17	105	122	415	0.00337	0.0864349	TRINITY_DN11387_c0_g1,TRINITY_DN11424_c0_g1,TRINITY_DN11424_c0_g2,TRINITY_DN12595_c0_g1,TRINITY_DN15968_c0_g1,TRINITY_DN16711_c0_g1,TRINITY_DN18403_c0_g1,TRINITY_DN20713_c0_g1,TRINITY_DN3274_c0_g1,TRINITY_DN4133_c0_g1,TRINITY_DN4632_c0_g1,TRINITY_DN480_c0_g2,TRINITY_DN4978_c0_g1,TRINITY_DN5076_c0_g1,TRINITY_DN5414_c0_g1,TRINITY_DN61566_c0_g1,TRINITY_DN8791_c0_g1	TRINITY_DN100563_c0_g1,TRINITY_DN101674_c0_g1,TRINITY_DN104775_c0_g1,TRINITY_DN10761_c0_g1,TRINITY_DN107701_c0_g1,TRINITY_DN107707_c0_g1,TRINITY_DN109180_c0_g1,TRINITY_DN113408_c0_g1,TRINITY_DN11577_c0_g1,TRINITY_DN116721_c0_g1,TRINITY_DN116881_c0_g1,TRINITY_DN117258_c0_g1,TRINITY_DN118773_c0_g1,TRINITY_DN120513_c0_g1,TRINITY_DN12336_c0_g1,TRINITY_DN12676_c0_g1,TRINITY_DN13293_c0_g1,TRINITY_DN136…
CC	GO:0030686	90S preribosome	1	25	26	67	0.0034	0.0867459	TRINITY_DN6901_c0_g1	TRINITY_DN100883_c0_g1,TRINITY_DN103539_c0_g1,TRINITY_DN104409_c0_g1,TRINITY_DN104776_c0_g1,TRINITY_DN104828_c0_g1,TRINITY_DN109215_c0_g1,TRINITY_DN112001_c0_g1,TRINITY_DN113836_c0_g1,TRINITY_DN116671_c0_g1,TRINITY_DN117275_c0_g1,TRINITY_DN15150_c0_g2,TRINITY_DN15155_c0_g1,TRINITY_DN16023_c0_g1,TRINITY_DN23073_c0_g1,TRINITY_DN23073_c0_g2,TRINITY_DN23073_c1_g1,TRINITY_DN24828_c0_g1,TRINITY_DN26415…
BP	GO:0006086	acetyl-CoA biosynthetic process from pyruvate	0	10	10	18	0.00341	0.0867459	-	TRINITY_DN107707_c0_g1,TRINITY_DN13783_c0_g2,TRINITY_DN25314_c0_g2,TRINITY_DN35968_c0_g2,TRINITY_DN56822_c0_g1,TRINITY_DN58476_c0_g1,TRINITY_DN58476_c1_g1,TRINITY_DN58476_c1_g2,TRINITY_DN58555_c0_g1,TRINITY_DN6369_c0_g1
BP	GO:0019676	ammonia assimilation cycle	4	6	10	18	0.00341	0.0867459	TRINITY_DN10978_c0_g2,TRINITY_DN18933_c0_g1,TRINITY_DN23377_c0_g1,TRINITY_DN27891_c0_g1	TRINITY_DN11038_c0_g1,TRINITY_DN22759_c0_g1,TRINITY_DN25366_c0_g1,TRINITY_DN30952_c0_g2,TRINITY_DN5406_c0_g1,TRINITY_DN612_c0_g1
BP	GO:0010045	response to nickel cation	3	2	5	6	0.0035	0.0883135	TRINITY_DN15944_c0_g1,TRINITY_DN6970_c0_g1,TRINITY_DN90251_c0_g1	TRINITY_DN17401_c0_g1,TRINITY_DN9945_c0_g1
BP	GO:0010476	gibberellin mediated signaling pathway	22	16	38	107	0.0035	0.0883135	TRINITY_DN10301_c0_g1,TRINITY_DN10462_c0_g1,TRINITY_DN113081_c0_g1,TRINITY_DN13708_c1_g1,TRINITY_DN14351_c0_g1,TRINITY_DN14617_c0_g1,TRINITY_DN16035_c0_g2,TRINITY_DN17540_c0_g1,TRINITY_DN1903_c0_g1,TRINITY_DN19942_c0_g1,TRINITY_DN20298_c0_g1,TRINITY_DN30501_c0_g1,TRINITY_DN40559_c0_g1,TRINITY_DN55905_c0_g1,TRINITY_DN5654_c0_g1,TRINITY_DN6042_c0_g1,TRINITY_DN61132_c0_g1,TRINITY_DN7479_c0_g1,TRINIT…	TRINITY_DN10591_c0_g1,TRINITY_DN11302_c0_g2,TRINITY_DN115350_c0_g1,TRINITY_DN12328_c0_g1,TRINITY_DN13588_c0_g1,TRINITY_DN18956_c0_g2,TRINITY_DN21242_c0_g1,TRINITY_DN25231_c0_g1,TRINITY_DN25820_c0_g1,TRINITY_DN3162_c0_g1,TRINITY_DN36200_c0_g1,TRINITY_DN40424_c0_g1,TRINITY_DN4904_c0_g1,TRINITY_DN62815_c0_g1,TRINITY_DN6695_c1_g1,TRINITY_DN7486_c0_g1
BP	GO:0010243	response to organonitrogen compound	46	108	154	538	0.0035	0.0883135	TRINITY_DN10195_c0_g1,TRINITY_DN1026_c0_g1,TRINITY_DN10422_c0_g1,TRINITY_DN10645_c0_g1,TRINITY_DN108872_c0_g1,TRINITY_DN11083_c0_g1,TRINITY_DN1113_c0_g3,TRINITY_DN11533_c1_g1,TRINITY_DN116417_c0_g1,TRINITY_DN12046_c0_g1,TRINITY_DN12200_c0_g2,TRINITY_DN12484_c0_g1,TRINITY_DN12601_c0_g1,TRINITY_DN13528_c0_g1,TRINITY_DN13826_c0_g1,TRINITY_DN1439_c0_g1,TRINITY_DN14443_c0_g1,TRINITY_DN14888_c0_g1,TRIN…	TRINITY_DN100625_c0_g1,TRINITY_DN10159_c0_g1,TRINITY_DN103925_c0_g1,TRINITY_DN104264_c0_g1,TRINITY_DN104775_c0_g1,TRINITY_DN11148_c0_g1,TRINITY_DN11383_c0_g1,TRINITY_DN11395_c0_g1,TRINITY_DN115576_c0_g1,TRINITY_DN11989_c0_g2,TRINITY_DN12046_c0_g2,TRINITY_DN12066_c0_g1,TRINITY_DN120749_c0_g1,TRINITY_DN12991_c0_g1,TRINITY_DN13390_c0_g1,TRINITY_DN13640_c0_g1,TRINITY_DN13663_c0_g1,TRINITY_DN13994_c0_…
MF	GO:0030545	receptor regulator activity	3	10	13	26	0.00353	0.0883541	TRINITY_DN117386_c0_g1,TRINITY_DN16446_c0_g3,TRINITY_DN6430_c0_g1	TRINITY_DN10802_c0_g1,TRINITY_DN113089_c0_g1,TRINITY_DN17270_c0_g1,TRINITY_DN19100_c0_g1,TRINITY_DN6151_c0_g1,TRINITY_DN6275_c0_g3,TRINITY_DN714_c0_g1,TRINITY_DN714_c0_g2,TRINITY_DN8776_c0_g1,TRINITY_DN95023_c0_g1
MF	GO:0030546	signaling receptor activator activity	3	10	13	26	0.00353	0.0883541	TRINITY_DN117386_c0_g1,TRINITY_DN16446_c0_g3,TRINITY_DN6430_c0_g1	TRINITY_DN10802_c0_g1,TRINITY_DN113089_c0_g1,TRINITY_DN17270_c0_g1,TRINITY_DN19100_c0_g1,TRINITY_DN6151_c0_g1,TRINITY_DN6275_c0_g3,TRINITY_DN714_c0_g1,TRINITY_DN714_c0_g2,TRINITY_DN8776_c0_g1,TRINITY_DN95023_c0_g1
MF	GO:0048018	receptor ligand activity	3	10	13	26	0.00353	0.0883541	TRINITY_DN117386_c0_g1,TRINITY_DN16446_c0_g3,TRINITY_DN6430_c0_g1	TRINITY_DN10802_c0_g1,TRINITY_DN113089_c0_g1,TRINITY_DN17270_c0_g1,TRINITY_DN19100_c0_g1,TRINITY_DN6151_c0_g1,TRINITY_DN6275_c0_g3,TRINITY_DN714_c0_g1,TRINITY_DN714_c0_g2,TRINITY_DN8776_c0_g1,TRINITY_DN95023_c0_g1
BP	GO:0009631	cold acclimation	12	15	27	70	0.00354	0.0883675	TRINITY_DN11509_c0_g1,TRINITY_DN12731_c0_g1,TRINITY_DN13789_c0_g1,TRINITY_DN13826_c0_g1,TRINITY_DN20174_c0_g1,TRINITY_DN2683_c0_g1,TRINITY_DN5558_c0_g1,TRINITY_DN5919_c0_g1,TRINITY_DN6063_c4_g1,TRINITY_DN6585_c0_g1,TRINITY_DN6652_c0_g1,TRINITY_DN9438_c0_g2	TRINITY_DN104775_c0_g1,TRINITY_DN10831_c0_g1,TRINITY_DN112911_c0_g1,TRINITY_DN13640_c0_g1,TRINITY_DN16987_c0_g1,TRINITY_DN17168_c0_g1,TRINITY_DN19923_c0_g1,TRINITY_DN29892_c0_g1,TRINITY_DN341_c1_g1,TRINITY_DN36027_c0_g2,TRINITY_DN36589_c0_g1,TRINITY_DN41126_c0_g1,TRINITY_DN44507_c0_g1,TRINITY_DN49059_c0_g1,TRINITY_DN54834_c0_g2
BP	GO:0009144	purine nucleoside triphosphate metabolic process	13	102	115	389	0.00355	0.0883808	TRINITY_DN11387_c0_g1,TRINITY_DN11424_c0_g1,TRINITY_DN11424_c0_g2,TRINITY_DN15968_c0_g1,TRINITY_DN16711_c0_g1,TRINITY_DN18210_c0_g1,TRINITY_DN18403_c0_g1,TRINITY_DN20713_c0_g1,TRINITY_DN4632_c0_g1,TRINITY_DN480_c0_g2,TRINITY_DN4978_c0_g1,TRINITY_DN61566_c0_g1,TRINITY_DN8791_c0_g1	TRINITY_DN100563_c0_g1,TRINITY_DN101674_c0_g1,TRINITY_DN104775_c0_g1,TRINITY_DN10625_c0_g1,TRINITY_DN10761_c0_g1,TRINITY_DN107701_c0_g1,TRINITY_DN107707_c0_g1,TRINITY_DN113408_c0_g1,TRINITY_DN11577_c0_g1,TRINITY_DN116721_c0_g1,TRINITY_DN116881_c0_g1,TRINITY_DN117258_c0_g1,TRINITY_DN118773_c0_g1,TRINITY_DN120513_c0_g1,TRINITY_DN12336_c0_g1,TRINITY_DN12676_c0_g1,TRINITY_DN13293_c0_g1,TRINITY_DN1364…
CC	GO:0043253	chloroplast ribosome	0	11	11	21	0.0037	0.0918702	-	TRINITY_DN108639_c0_g1,TRINITY_DN116340_c0_g1,TRINITY_DN120367_c0_g1,TRINITY_DN120761_c0_g1,TRINITY_DN13308_c0_g1,TRINITY_DN13308_c1_g2,TRINITY_DN17176_c0_g1,TRINITY_DN17690_c0_g1,TRINITY_DN19292_c0_g1,TRINITY_DN19292_c0_g2,TRINITY_DN19292_c0_g3
MF	GO:0005342	organic acid transmembrane transporter activity	21	37	58	175	0.00372	0.0918781	TRINITY_DN10895_c0_g1,TRINITY_DN11284_c0_g1,TRINITY_DN11284_c0_g2,TRINITY_DN11382_c0_g1,TRINITY_DN11693_c0_g2,TRINITY_DN13916_c0_g1,TRINITY_DN14581_c0_g1,TRINITY_DN1596_c0_g1,TRINITY_DN16702_c0_g1,TRINITY_DN16974_c0_g1,TRINITY_DN2112_c0_g1,TRINITY_DN22607_c0_g1,TRINITY_DN22826_c0_g1,TRINITY_DN2696_c0_g1,TRINITY_DN28447_c0_g1,TRINITY_DN3110_c0_g1,TRINITY_DN4031_c0_g1,TRINITY_DN4315_c0_g1,TRINITY_D…	TRINITY_DN104516_c0_g1,TRINITY_DN11791_c0_g1,TRINITY_DN121060_c0_g1,TRINITY_DN14689_c0_g1,TRINITY_DN15017_c0_g1,TRINITY_DN16032_c0_g1,TRINITY_DN17400_c0_g1,TRINITY_DN18201_c0_g1,TRINITY_DN18296_c0_g1,TRINITY_DN18646_c0_g1,TRINITY_DN21419_c0_g1,TRINITY_DN23436_c0_g1,TRINITY_DN24070_c0_g1,TRINITY_DN24110_c0_g1,TRINITY_DN24603_c0_g1,TRINITY_DN2469_c0_g1,TRINITY_DN26003_c0_g1,TRINITY_DN28419_c0_g1,TR…
MF	GO:0046943	carboxylic acid transmembrane transporter activity	21	37	58	175	0.00372	0.0918781	TRINITY_DN10895_c0_g1,TRINITY_DN11284_c0_g1,TRINITY_DN11284_c0_g2,TRINITY_DN11382_c0_g1,TRINITY_DN11693_c0_g2,TRINITY_DN13916_c0_g1,TRINITY_DN14581_c0_g1,TRINITY_DN1596_c0_g1,TRINITY_DN16702_c0_g1,TRINITY_DN16974_c0_g1,TRINITY_DN2112_c0_g1,TRINITY_DN22607_c0_g1,TRINITY_DN22826_c0_g1,TRINITY_DN2696_c0_g1,TRINITY_DN28447_c0_g1,TRINITY_DN3110_c0_g1,TRINITY_DN4031_c0_g1,TRINITY_DN4315_c0_g1,TRINITY_D…	TRINITY_DN104516_c0_g1,TRINITY_DN11791_c0_g1,TRINITY_DN121060_c0_g1,TRINITY_DN14689_c0_g1,TRINITY_DN15017_c0_g1,TRINITY_DN16032_c0_g1,TRINITY_DN17400_c0_g1,TRINITY_DN18201_c0_g1,TRINITY_DN18296_c0_g1,TRINITY_DN18646_c0_g1,TRINITY_DN21419_c0_g1,TRINITY_DN23436_c0_g1,TRINITY_DN24070_c0_g1,TRINITY_DN24110_c0_g1,TRINITY_DN24603_c0_g1,TRINITY_DN2469_c0_g1,TRINITY_DN26003_c0_g1,TRINITY_DN28419_c0_g1,TR…
BP	GO:0044264	cellular polysaccharide metabolic process	50	84	134	462	0.00375	0.0923747	TRINITY_DN10427_c0_g1,TRINITY_DN10864_c0_g1,TRINITY_DN10885_c0_g1,TRINITY_DN11509_c0_g1,TRINITY_DN11597_c0_g1,TRINITY_DN11701_c0_g1,TRINITY_DN11950_c0_g1,TRINITY_DN12221_c0_g1,TRINITY_DN123184_c0_g1,TRINITY_DN13114_c0_g1,TRINITY_DN1339_c0_g1,TRINITY_DN1339_c0_g2,TRINITY_DN13789_c0_g1,TRINITY_DN1587_c0_g1,TRINITY_DN16748_c0_g1,TRINITY_DN17674_c0_g1,TRINITY_DN17798_c0_g1,TRINITY_DN18145_c0_g1,TRINI…	TRINITY_DN111250_c0_g1,TRINITY_DN11252_c0_g1,TRINITY_DN114391_c0_g1,TRINITY_DN11440_c0_g1,TRINITY_DN116862_c0_g1,TRINITY_DN11768_c0_g1,TRINITY_DN121430_c0_g1,TRINITY_DN13082_c0_g1,TRINITY_DN13853_c0_g2,TRINITY_DN13909_c0_g1,TRINITY_DN14157_c0_g1,TRINITY_DN14495_c0_g1,TRINITY_DN14923_c0_g1,TRINITY_DN1516_c0_g1,TRINITY_DN15182_c0_g1,TRINITY_DN1553_c0_g1,TRINITY_DN15923_c0_g1,TRINITY_DN159_c0_g3,TRI…
BP	GO:0015801	aromatic amino acid transport	2	6	8	13	0.0038	0.09336	TRINITY_DN2112_c0_g1,TRINITY_DN4031_c0_g1	TRINITY_DN104516_c0_g1,TRINITY_DN11791_c0_g1,TRINITY_DN21419_c0_g1,TRINITY_DN28419_c0_g1,TRINITY_DN57065_c0_g1,TRINITY_DN97954_c0_g1
MF	GO:0004338	glucan exo-1,3-beta-glucosidase activity	3	2	5	6	0.00381	0.09336	TRINITY_DN15944_c0_g1,TRINITY_DN6970_c0_g1,TRINITY_DN90251_c0_g1	TRINITY_DN14495_c0_g1,TRINITY_DN17401_c0_g1
BP	GO:0005975	carbohydrate metabolic process	146	279	425	1614	0.0039	0.0950619	TRINITY_DN101097_c0_g1,TRINITY_DN10291_c0_g1,TRINITY_DN10427_c0_g1,TRINITY_DN10459_c0_g1,TRINITY_DN10864_c0_g1,TRINITY_DN10885_c0_g1,TRINITY_DN109104_c0_g1,TRINITY_DN11080_c1_g1,TRINITY_DN112015_c0_g1,TRINITY_DN11424_c0_g1,TRINITY_DN11424_c0_g2,TRINITY_DN11509_c0_g1,TRINITY_DN11597_c0_g1,TRINITY_DN11701_c0_g1,TRINITY_DN11737_c0_g1,TRINITY_DN11938_c0_g1,TRINITY_DN11950_c0_g1,TRINITY_DN120433_c0_g1…	TRINITY_DN100563_c0_g1,TRINITY_DN100577_c0_g1,TRINITY_DN100601_c0_g1,TRINITY_DN101361_c0_g1,TRINITY_DN103933_c0_g1,TRINITY_DN10425_c1_g1,TRINITY_DN104775_c0_g1,TRINITY_DN105270_c0_g1,TRINITY_DN106121_c0_g1,TRINITY_DN10761_c0_g1,TRINITY_DN107707_c0_g1,TRINITY_DN109483_c0_g1,TRINITY_DN111250_c0_g1,TRINITY_DN1114_c0_g2,TRINITY_DN111998_c0_g1,TRINITY_DN11250_c0_g1,TRINITY_DN11252_c0_g1,TRINITY_DN1125…
MF	GO:0004738	pyruvate dehydrogenase activity	0	10	10	18	0.00391	0.0950619	-	TRINITY_DN107707_c0_g1,TRINITY_DN13783_c0_g2,TRINITY_DN25314_c0_g2,TRINITY_DN35968_c0_g2,TRINITY_DN56822_c0_g1,TRINITY_DN58476_c0_g1,TRINITY_DN58476_c1_g1,TRINITY_DN58476_c1_g2,TRINITY_DN58555_c0_g1,TRINITY_DN6369_c0_g1
MF	GO:0004739	pyruvate dehydrogenase (acetyl-transferring) activity	0	10	10	18	0.00391	0.0950619	-	TRINITY_DN107707_c0_g1,TRINITY_DN13783_c0_g2,TRINITY_DN25314_c0_g2,TRINITY_DN35968_c0_g2,TRINITY_DN56822_c0_g1,TRINITY_DN58476_c0_g1,TRINITY_DN58476_c1_g1,TRINITY_DN58476_c1_g2,TRINITY_DN58555_c0_g1,TRINITY_DN6369_c0_g1
BP	GO:1901657	glycosyl compound metabolic process	47	55	102	341	0.00394	0.0955368	TRINITY_DN10459_c0_g1,TRINITY_DN10508_c0_g1,TRINITY_DN109726_c0_g1,TRINITY_DN11008_c0_g1,TRINITY_DN11022_c0_g1,TRINITY_DN11417_c0_g2,TRINITY_DN11766_c0_g1,TRINITY_DN120433_c0_g1,TRINITY_DN12595_c0_g1,TRINITY_DN13132_c0_g1,TRINITY_DN13593_c0_g1,TRINITY_DN13708_c1_g1,TRINITY_DN1438_c0_g2,TRINITY_DN15031_c0_g1,TRINITY_DN15614_c0_g1,TRINITY_DN15944_c0_g1,TRINITY_DN16989_c0_g1,TRINITY_DN17638_c0_g2,TR…	TRINITY_DN10180_c0_g1,TRINITY_DN10591_c0_g1,TRINITY_DN10625_c0_g1,TRINITY_DN109180_c0_g1,TRINITY_DN111993_c0_g1,TRINITY_DN11293_c0_g1,TRINITY_DN118738_c0_g1,TRINITY_DN120882_c0_g1,TRINITY_DN13677_c0_g1,TRINITY_DN13961_c0_g1,TRINITY_DN14336_c1_g1,TRINITY_DN14336_c1_g2,TRINITY_DN14486_c0_g1,TRINITY_DN16003_c1_g1,TRINITY_DN17401_c0_g1,TRINITY_DN1981_c0_g1,TRINITY_DN20016_c0_g1,TRINITY_DN20031_c0_g1,…
BP	GO:0016052	carbohydrate catabolic process	42	90	132	455	0.00395	0.0955368	TRINITY_DN10864_c0_g1,TRINITY_DN109104_c0_g1,TRINITY_DN11424_c0_g1,TRINITY_DN11424_c0_g2,TRINITY_DN11509_c0_g1,TRINITY_DN13034_c0_g1,TRINITY_DN13789_c0_g1,TRINITY_DN13840_c0_g1,TRINITY_DN1442_c0_g1,TRINITY_DN15968_c0_g1,TRINITY_DN16672_c0_g1,TRINITY_DN16711_c0_g1,TRINITY_DN16748_c0_g1,TRINITY_DN17280_c0_g1,TRINITY_DN17798_c0_g1,TRINITY_DN18403_c0_g1,TRINITY_DN18805_c1_g1,TRINITY_DN2006_c0_g1,TRIN…	TRINITY_DN100563_c0_g1,TRINITY_DN104775_c0_g1,TRINITY_DN10761_c0_g1,TRINITY_DN107707_c0_g1,TRINITY_DN111998_c0_g1,TRINITY_DN11252_c0_g1,TRINITY_DN114391_c0_g1,TRINITY_DN11577_c0_g1,TRINITY_DN116721_c0_g1,TRINITY_DN116881_c0_g1,TRINITY_DN118773_c0_g1,TRINITY_DN12806_c0_g1,TRINITY_DN13293_c0_g1,TRINITY_DN13640_c0_g1,TRINITY_DN13783_c0_g2,TRINITY_DN13853_c0_g2,TRINITY_DN13909_c0_g1,TRINITY_DN14495_c…
BP	GO:0072511	divalent inorganic cation transport	19	52	71	226	0.00412	0.099391	TRINITY_DN112480_c0_g1,TRINITY_DN11519_c0_g1,TRINITY_DN11997_c0_g1,TRINITY_DN12200_c0_g2,TRINITY_DN12484_c0_g1,TRINITY_DN1546_c2_g1,TRINITY_DN1578_c0_g1,TRINITY_DN20195_c0_g1,TRINITY_DN23952_c0_g1,TRINITY_DN24232_c0_g1,TRINITY_DN25890_c0_g1,TRINITY_DN30598_c0_g1,TRINITY_DN33782_c0_g1,TRINITY_DN5721_c0_g2,TRINITY_DN5756_c1_g1,TRINITY_DN605_c0_g1,TRINITY_DN6652_c0_g1,TRINITY_DN7127_c0_g3,TRINITY_DN…	TRINITY_DN103925_c0_g1,TRINITY_DN11499_c0_g1,TRINITY_DN116465_c0_g1,TRINITY_DN11989_c0_g2,TRINITY_DN12066_c0_g1,TRINITY_DN15758_c0_g1,TRINITY_DN16785_c0_g2,TRINITY_DN17484_c0_g1,TRINITY_DN18205_c0_g1,TRINITY_DN18660_c0_g1,TRINITY_DN18660_c0_g2,TRINITY_DN19654_c0_g2,TRINITY_DN20246_c0_g1,TRINITY_DN21708_c0_g1,TRINITY_DN22492_c0_g1,TRINITY_DN22777_c0_g1,TRINITY_DN23944_c0_g1,TRINITY_DN24107_c0_g1,T…
BP	GO:0009205	purine ribonucleoside triphosphate metabolic process	12	102	114	387	0.00417	0.100338	TRINITY_DN11387_c0_g1,TRINITY_DN11424_c0_g1,TRINITY_DN11424_c0_g2,TRINITY_DN15968_c0_g1,TRINITY_DN16711_c0_g1,TRINITY_DN18403_c0_g1,TRINITY_DN20713_c0_g1,TRINITY_DN4632_c0_g1,TRINITY_DN480_c0_g2,TRINITY_DN4978_c0_g1,TRINITY_DN61566_c0_g1,TRINITY_DN8791_c0_g1	TRINITY_DN100563_c0_g1,TRINITY_DN101674_c0_g1,TRINITY_DN104775_c0_g1,TRINITY_DN10625_c0_g1,TRINITY_DN10761_c0_g1,TRINITY_DN107701_c0_g1,TRINITY_DN107707_c0_g1,TRINITY_DN113408_c0_g1,TRINITY_DN11577_c0_g1,TRINITY_DN116721_c0_g1,TRINITY_DN116881_c0_g1,TRINITY_DN117258_c0_g1,TRINITY_DN118773_c0_g1,TRINITY_DN120513_c0_g1,TRINITY_DN12336_c0_g1,TRINITY_DN12676_c0_g1,TRINITY_DN13293_c0_g1,TRINITY_DN1364…
CC	GO:0042470	melanosome	1	16	17	39	0.0042	0.100542	TRINITY_DN12200_c0_g2	TRINITY_DN103536_c0_g1,TRINITY_DN103565_c0_g1,TRINITY_DN112390_c0_g1,TRINITY_DN116216_c0_g1,TRINITY_DN121696_c0_g1,TRINITY_DN13893_c0_g1,TRINITY_DN17348_c0_g1,TRINITY_DN17348_c1_g3,TRINITY_DN18669_c0_g1,TRINITY_DN21326_c0_g2,TRINITY_DN25134_c1_g1,TRINITY_DN28856_c1_g1,TRINITY_DN34008_c0_g1,TRINITY_DN37388_c0_g1,TRINITY_DN46970_c0_g1,TRINITY_DN56799_c0_g2
CC	GO:0048770	pigment granule	1	16	17	39	0.0042	0.100542	TRINITY_DN12200_c0_g2	TRINITY_DN103536_c0_g1,TRINITY_DN103565_c0_g1,TRINITY_DN112390_c0_g1,TRINITY_DN116216_c0_g1,TRINITY_DN121696_c0_g1,TRINITY_DN13893_c0_g1,TRINITY_DN17348_c0_g1,TRINITY_DN17348_c1_g3,TRINITY_DN18669_c0_g1,TRINITY_DN21326_c0_g2,TRINITY_DN25134_c1_g1,TRINITY_DN28856_c1_g1,TRINITY_DN34008_c0_g1,TRINITY_DN37388_c0_g1,TRINITY_DN46970_c0_g1,TRINITY_DN56799_c0_g2
BP	GO:0044262	cellular carbohydrate metabolic process	82	137	219	794	0.00423	0.101001	TRINITY_DN10427_c0_g1,TRINITY_DN10864_c0_g1,TRINITY_DN10885_c0_g1,TRINITY_DN11080_c1_g1,TRINITY_DN11509_c0_g1,TRINITY_DN11597_c0_g1,TRINITY_DN11701_c0_g1,TRINITY_DN11938_c0_g1,TRINITY_DN11950_c0_g1,TRINITY_DN120433_c0_g1,TRINITY_DN12221_c0_g1,TRINITY_DN12224_c0_g1,TRINITY_DN12293_c0_g1,TRINITY_DN123184_c0_g1,TRINITY_DN12594_c0_g1,TRINITY_DN13034_c0_g1,TRINITY_DN13114_c0_g1,TRINITY_DN1339_c0_g1,TR…	TRINITY_DN104775_c0_g1,TRINITY_DN105270_c0_g1,TRINITY_DN106121_c0_g1,TRINITY_DN10761_c0_g1,TRINITY_DN111250_c0_g1,TRINITY_DN11252_c0_g1,TRINITY_DN11293_c0_g1,TRINITY_DN114391_c0_g1,TRINITY_DN11440_c0_g1,TRINITY_DN116862_c0_g1,TRINITY_DN11768_c0_g1,TRINITY_DN120925_c0_g1,TRINITY_DN121430_c0_g1,TRINITY_DN123668_c0_g1,TRINITY_DN13082_c0_g1,TRINITY_DN13640_c0_g1,TRINITY_DN13853_c0_g2,TRINITY_DN13909_…
MF	GO:0015399	primary active transmembrane transporter activity	33	109	142	486	0.00426	0.10116	TRINITY_DN10248_c0_g3,TRINITY_DN10248_c0_g4,TRINITY_DN11059_c0_g1,TRINITY_DN112480_c0_g1,TRINITY_DN11387_c0_g1,TRINITY_DN11997_c0_g1,TRINITY_DN12994_c0_g1,TRINITY_DN13837_c0_g1,TRINITY_DN14577_c0_g1,TRINITY_DN14888_c0_g1,TRINITY_DN1546_c2_g1,TRINITY_DN1578_c0_g1,TRINITY_DN15974_c0_g1,TRINITY_DN16740_c0_g1,TRINITY_DN18676_c0_g1,TRINITY_DN20894_c0_g1,TRINITY_DN2248_c1_g1,TRINITY_DN22607_c0_g1,TRINI…	TRINITY_DN101214_c0_g1,TRINITY_DN10368_c0_g1,TRINITY_DN104909_c0_g1,TRINITY_DN107701_c0_g1,TRINITY_DN11100_c0_g1,TRINITY_DN113408_c0_g1,TRINITY_DN11340_c0_g1,TRINITY_DN11499_c0_g1,TRINITY_DN117742_c0_g1,TRINITY_DN12000_c0_g2,TRINITY_DN121452_c0_g1,TRINITY_DN12336_c0_g1,TRINITY_DN12423_c0_g1,TRINITY_DN13368_c0_g1,TRINITY_DN13663_c0_g1,TRINITY_DN13806_c0_g1,TRINITY_DN14142_c0_g1,TRINITY_DN14856_c0_…
MF	GO:0043492	ATPase activity, coupled to movement of substances	34	108	142	486	0.00426	0.10116	TRINITY_DN10248_c0_g3,TRINITY_DN10248_c0_g4,TRINITY_DN11059_c0_g1,TRINITY_DN112480_c0_g1,TRINITY_DN11387_c0_g1,TRINITY_DN11997_c0_g1,TRINITY_DN12994_c0_g1,TRINITY_DN13837_c0_g1,TRINITY_DN14577_c0_g1,TRINITY_DN14888_c0_g1,TRINITY_DN1546_c2_g1,TRINITY_DN1578_c0_g1,TRINITY_DN15974_c0_g1,TRINITY_DN16740_c0_g1,TRINITY_DN20894_c0_g1,TRINITY_DN2248_c1_g1,TRINITY_DN22607_c0_g1,TRINITY_DN241_c1_g2,TRINITY…	TRINITY_DN101214_c0_g1,TRINITY_DN10368_c0_g1,TRINITY_DN104909_c0_g1,TRINITY_DN107701_c0_g1,TRINITY_DN11100_c0_g1,TRINITY_DN113408_c0_g1,TRINITY_DN11340_c0_g1,TRINITY_DN11499_c0_g1,TRINITY_DN117742_c0_g1,TRINITY_DN12000_c0_g2,TRINITY_DN121452_c0_g1,TRINITY_DN12336_c0_g1,TRINITY_DN12423_c0_g1,TRINITY_DN13368_c0_g1,TRINITY_DN13663_c0_g1,TRINITY_DN13806_c0_g1,TRINITY_DN14142_c0_g1,TRINITY_DN14156_c0_…
MF	GO:0016703	oxidoreductase activity, acting on single donors with incorporation of molecular oxygen, incorporation of one atom of oxygen (internal monooxygenases or internal mixed function oxidases)	2	6	8	13	0.00428	0.10116	TRINITY_DN7193_c0_g1,TRINITY_DN76292_c0_g1	TRINITY_DN110712_c0_g1,TRINITY_DN11526_c0_g1,TRINITY_DN22813_c0_g1,TRINITY_DN22813_c1_g1,TRINITY_DN26783_c0_g1,TRINITY_DN52202_c0_g1
BP	GO:0000038	very long-chain fatty acid metabolic process	4	15	19	45	0.00428	0.10116	TRINITY_DN12741_c0_g1,TRINITY_DN14532_c0_g1,TRINITY_DN3289_c0_g1,TRINITY_DN4485_c0_g1	TRINITY_DN10012_c0_g1,TRINITY_DN13634_c0_g1,TRINITY_DN18652_c0_g1,TRINITY_DN20643_c0_g1,TRINITY_DN23047_c0_g2,TRINITY_DN26395_c0_g1,TRINITY_DN26836_c0_g1,TRINITY_DN28586_c0_g1,TRINITY_DN37071_c0_g3,TRINITY_DN39319_c0_g1,TRINITY_DN41239_c1_g3,TRINITY_DN482_c0_g1,TRINITY_DN8712_c0_g1,TRINITY_DN9043_c0_g1,TRINITY_DN9724_c0_g1
BP	GO:0035337	fatty-acyl-CoA metabolic process	0	12	12	24	0.0043	0.101376	-	TRINITY_DN12747_c0_g1,TRINITY_DN21181_c0_g1,TRINITY_DN23047_c0_g2,TRINITY_DN23180_c0_g1,TRINITY_DN2475_c0_g1,TRINITY_DN2475_c0_g2,TRINITY_DN27862_c0_g2,TRINITY_DN56475_c0_g1,TRINITY_DN59168_c0_g1,TRINITY_DN7382_c0_g1,TRINITY_DN89447_c0_g1,TRINITY_DN9043_c0_g1
BP	GO:1901605	alpha-amino acid metabolic process	60	110	170	603	0.00439	0.103237	TRINITY_DN101353_c0_g1,TRINITY_DN10563_c0_g1,TRINITY_DN107962_c0_g1,TRINITY_DN10978_c0_g2,TRINITY_DN11573_c0_g1,TRINITY_DN11617_c0_g1,TRINITY_DN12446_c0_g1,TRINITY_DN12595_c0_g1,TRINITY_DN13574_c0_g1,TRINITY_DN13593_c0_g1,TRINITY_DN14664_c0_g1,TRINITY_DN15252_c0_g1,TRINITY_DN15872_c0_g3,TRINITY_DN16079_c0_g1,TRINITY_DN16439_c0_g1,TRINITY_DN16568_c0_g1,TRINITY_DN16989_c0_g1,TRINITY_DN17101_c0_g1,T…	TRINITY_DN104516_c0_g1,TRINITY_DN107841_c0_g1,TRINITY_DN108003_c0_g1,TRINITY_DN108669_c0_g1,TRINITY_DN10994_c0_g1,TRINITY_DN11038_c0_g1,TRINITY_DN111266_c0_g1,TRINITY_DN111993_c0_g1,TRINITY_DN113026_c0_g1,TRINITY_DN11302_c0_g2,TRINITY_DN116615_c0_g1,TRINITY_DN116827_c0_g1,TRINITY_DN118738_c0_g1,TRINITY_DN12037_c0_g1,TRINITY_DN13257_c0_g1,TRINITY_DN14281_c1_g1,TRINITY_DN14336_c1_g1,TRINITY_DN14336…
BP	GO:0046487	glyoxylate metabolic process	4	14	18	42	0.00443	0.103916	TRINITY_DN12224_c0_g1,TRINITY_DN17575_c0_g1,TRINITY_DN690_c0_g2,TRINITY_DN7606_c0_g1	TRINITY_DN106121_c0_g1,TRINITY_DN123668_c0_g1,TRINITY_DN13957_c1_g1,TRINITY_DN16894_c0_g1,TRINITY_DN18044_c0_g1,TRINITY_DN20422_c0_g1,TRINITY_DN20574_c0_g2,TRINITY_DN30279_c0_g1,TRINITY_DN39527_c0_g1,TRINITY_DN41354_c0_g1,TRINITY_DN56642_c0_g1,TRINITY_DN60976_c0_g1,TRINITY_DN9587_c0_g1,TRINITY_DN97387_c1_g1
MF	GO:0016776	phosphotransferase activity, phosphate group as acceptor	8	31	39	110	0.00446	0.104096	TRINITY_DN11387_c0_g1,TRINITY_DN25907_c0_g1,TRINITY_DN4632_c0_g1,TRINITY_DN4951_c0_g1,TRINITY_DN4978_c0_g1,TRINITY_DN61566_c0_g1,TRINITY_DN7020_c0_g1,TRINITY_DN7020_c0_g2	TRINITY_DN10625_c0_g1,TRINITY_DN107701_c0_g1,TRINITY_DN113408_c0_g1,TRINITY_DN12336_c0_g1,TRINITY_DN13961_c0_g1,TRINITY_DN15900_c0_g1,TRINITY_DN15900_c1_g1,TRINITY_DN15991_c0_g1,TRINITY_DN18355_c0_g1,TRINITY_DN19003_c0_g1,TRINITY_DN20016_c0_g1,TRINITY_DN20021_c0_g1,TRINITY_DN20031_c0_g1,TRINITY_DN20876_c0_g1,TRINITY_DN22235_c0_g1,TRINITY_DN27686_c0_g1,TRINITY_DN28908_c0_g1,TRINITY_DN29997_c0_g1,T…
MF	GO:0046873	metal ion transmembrane transporter activity	29	75	104	344	0.00446	0.104096	TRINITY_DN10918_c0_g1,TRINITY_DN112480_c0_g1,TRINITY_DN11997_c0_g1,TRINITY_DN122658_c0_g1,TRINITY_DN12484_c0_g1,TRINITY_DN1299_c0_g2,TRINITY_DN13916_c0_g1,TRINITY_DN1546_c2_g1,TRINITY_DN1578_c0_g1,TRINITY_DN1779_c0_g1,TRINITY_DN20195_c0_g1,TRINITY_DN21974_c0_g1,TRINITY_DN24232_c0_g1,TRINITY_DN24391_c0_g1,TRINITY_DN25890_c0_g1,TRINITY_DN33782_c0_g1,TRINITY_DN38872_c0_g1,TRINITY_DN42_c1_g2,TRINITY_…	TRINITY_DN11499_c0_g1,TRINITY_DN11556_c0_g1,TRINITY_DN116465_c0_g1,TRINITY_DN1169_c0_g1,TRINITY_DN1169_c0_g2,TRINITY_DN11790_c0_g1,TRINITY_DN11989_c0_g2,TRINITY_DN12066_c0_g1,TRINITY_DN12785_c0_g1,TRINITY_DN12785_c0_g2,TRINITY_DN15758_c0_g1,TRINITY_DN16785_c0_g2,TRINITY_DN17484_c0_g1,TRINITY_DN18660_c0_g1,TRINITY_DN18660_c0_g2,TRINITY_DN18688_c0_g2,TRINITY_DN19654_c0_g2,TRINITY_DN19936_c1_g1,TRIN…
BP	GO:0009827	plant-type cell wall modification	8	8	16	36	0.00464	0.107723	TRINITY_DN10291_c0_g1,TRINITY_DN12294_c0_g1,TRINITY_DN14279_c0_g1,TRINITY_DN1587_c0_g1,TRINITY_DN17280_c0_g1,TRINITY_DN18145_c0_g1,TRINITY_DN2299_c0_g1,TRINITY_DN776_c2_g1	TRINITY_DN18809_c1_g1,TRINITY_DN4056_c0_g1,TRINITY_DN4191_c2_g1,TRINITY_DN5295_c0_g1,TRINITY_DN57091_c0_g1,TRINITY_DN7521_c0_g1,TRINITY_DN7717_c0_g1,TRINITY_DN78390_c0_g1
BP	GO:0042335	cuticle development	11	5	16	36	0.00464	0.107723	TRINITY_DN100435_c0_g1,TRINITY_DN10429_c0_g1,TRINITY_DN13924_c2_g1,TRINITY_DN14279_c0_g1,TRINITY_DN2284_c0_g1,TRINITY_DN2299_c0_g1,TRINITY_DN3254_c0_g1,TRINITY_DN61779_c0_g1,TRINITY_DN7122_c0_g1,TRINITY_DN776_c2_g1,TRINITY_DN8963_c1_g1	TRINITY_DN18809_c1_g1,TRINITY_DN18877_c0_g1,TRINITY_DN18921_c0_g2,TRINITY_DN28037_c0_g1,TRINITY_DN28586_c0_g1
BP	GO:0071826	ribonucleoprotein complex subunit organization	2	124	126	434	0.00465	0.107723	TRINITY_DN35464_c0_g1,TRINITY_DN8617_c0_g1	TRINITY_DN100728_c0_g1,TRINITY_DN100883_c0_g1,TRINITY_DN101058_c0_g1,TRINITY_DN101686_c0_g1,TRINITY_DN102475_c0_g1,TRINITY_DN104627_c0_g1,TRINITY_DN106063_c0_g1,TRINITY_DN106215_c0_g1,TRINITY_DN106752_c0_g1,TRINITY_DN10815_c0_g3,TRINITY_DN108615_c0_g1,TRINITY_DN108639_c0_g1,TRINITY_DN109069_c0_g1,TRINITY_DN112025_c0_g1,TRINITY_DN113588_c0_g1,TRINITY_DN113657_c0_g1,TRINITY_DN114211_c0_g1,TRINITY_D…
BP	GO:1905428	regulation of plant organ formation	3	12	15	33	0.00468	0.10815	TRINITY_DN10918_c0_g1,TRINITY_DN2335_c0_g1,TRINITY_DN25370_c0_g1	TRINITY_DN102475_c0_g1,TRINITY_DN120622_c0_g1,TRINITY_DN12337_c0_g1,TRINITY_DN12337_c0_g2,TRINITY_DN16150_c0_g1,TRINITY_DN19756_c0_g2,TRINITY_DN5682_c0_g1,TRINITY_DN6345_c0_g1,TRINITY_DN8435_c1_g1,TRINITY_DN8797_c0_g1,TRINITY_DN8797_c0_g2,TRINITY_DN96124_c0_g1
MF	GO:0051213	dioxygenase activity	25	33	58	177	0.00489	0.111849	TRINITY_DN103968_c0_g1,TRINITY_DN11342_c0_g1,TRINITY_DN120433_c0_g1,TRINITY_DN12303_c0_g1,TRINITY_DN12766_c1_g1,TRINITY_DN13471_c0_g1,TRINITY_DN15409_c0_g1,TRINITY_DN16035_c0_g2,TRINITY_DN16051_c0_g1,TRINITY_DN16779_c0_g1,TRINITY_DN19942_c0_g1,TRINITY_DN19975_c0_g1,TRINITY_DN2367_c0_g1,TRINITY_DN28551_c0_g1,TRINITY_DN28931_c0_g1,TRINITY_DN31197_c0_g1,TRINITY_DN32632_c0_g1,TRINITY_DN42129_c0_g1,TR…	TRINITY_DN10489_c1_g1,TRINITY_DN10591_c0_g1,TRINITY_DN10756_c0_g1,TRINITY_DN11293_c0_g1,TRINITY_DN116827_c0_g1,TRINITY_DN120691_c0_g1,TRINITY_DN12328_c0_g1,TRINITY_DN12766_c0_g1,TRINITY_DN12766_c0_g2,TRINITY_DN13588_c0_g1,TRINITY_DN14238_c0_g1,TRINITY_DN14281_c1_g1,TRINITY_DN18560_c0_g1,TRINITY_DN19951_c0_g1,TRINITY_DN21050_c0_g1,TRINITY_DN21242_c0_g1,TRINITY_DN2213_c0_g1,TRINITY_DN25231_c0_g1,TR…
BP	GO:0005976	polysaccharide metabolic process	70	105	175	624	0.00489	0.111849	TRINITY_DN10427_c0_g1,TRINITY_DN10864_c0_g1,TRINITY_DN10885_c0_g1,TRINITY_DN109104_c0_g1,TRINITY_DN11509_c0_g1,TRINITY_DN11597_c0_g1,TRINITY_DN11701_c0_g1,TRINITY_DN11950_c0_g1,TRINITY_DN12221_c0_g1,TRINITY_DN123184_c0_g1,TRINITY_DN13114_c0_g1,TRINITY_DN1339_c0_g1,TRINITY_DN1339_c0_g2,TRINITY_DN13789_c0_g1,TRINITY_DN13840_c0_g1,TRINITY_DN1442_c0_g1,TRINITY_DN1587_c0_g1,TRINITY_DN16672_c0_g1,TRINI…	TRINITY_DN100601_c0_g1,TRINITY_DN111250_c0_g1,TRINITY_DN111998_c0_g1,TRINITY_DN11252_c0_g1,TRINITY_DN112560_c0_g1,TRINITY_DN114391_c0_g1,TRINITY_DN11440_c0_g1,TRINITY_DN116862_c0_g1,TRINITY_DN11768_c0_g1,TRINITY_DN121430_c0_g1,TRINITY_DN12806_c0_g1,TRINITY_DN13082_c0_g1,TRINITY_DN13853_c0_g2,TRINITY_DN13909_c0_g1,TRINITY_DN14157_c0_g1,TRINITY_DN14495_c0_g1,TRINITY_DN14923_c0_g1,TRINITY_DN1516_c0_…
BP	GO:0006863	purine nucleobase transport	1	8	9	16	0.0049	0.111849	TRINITY_DN630_c0_g1	TRINITY_DN11072_c0_g1,TRINITY_DN12100_c0_g1,TRINITY_DN15394_c0_g1,TRINITY_DN20863_c0_g1,TRINITY_DN2304_c0_g1,TRINITY_DN2614_c0_g1,TRINITY_DN69365_c1_g1,TRINITY_DN937_c0_g1
BP	GO:0055071	manganese ion homeostasis	2	7	9	16	0.0049	0.111849	TRINITY_DN605_c0_g1,TRINITY_DN6652_c0_g1	TRINITY_DN12785_c0_g1,TRINITY_DN12785_c0_g2,TRINITY_DN3091_c0_g1,TRINITY_DN642_c0_g1,TRINITY_DN77946_c0_g1,TRINITY_DN953_c0_g1,TRINITY_DN98936_c0_g1
BP	GO:1904823	purine nucleobase transmembrane transport	1	8	9	16	0.0049	0.111849	TRINITY_DN630_c0_g1	TRINITY_DN11072_c0_g1,TRINITY_DN12100_c0_g1,TRINITY_DN15394_c0_g1,TRINITY_DN20863_c0_g1,TRINITY_DN2304_c0_g1,TRINITY_DN2614_c0_g1,TRINITY_DN69365_c1_g1,TRINITY_DN937_c0_g1
MF	GO:0003700	DNA-binding transcription factor activity	221	236	457	1719	0.00492	0.112032	TRINITY_DN10019_c0_g1,TRINITY_DN10050_c1_g1,TRINITY_DN10130_c0_g1,TRINITY_DN10195_c0_g1,TRINITY_DN1026_c0_g1,TRINITY_DN10301_c0_g1,TRINITY_DN103534_c0_g1,TRINITY_DN10422_c0_g1,TRINITY_DN10462_c0_g1,TRINITY_DN10603_c0_g2,TRINITY_DN106133_c0_g1,TRINITY_DN10645_c0_g1,TRINITY_DN10685_c0_g1,TRINITY_DN10700_c0_g2,TRINITY_DN10704_c0_g1,TRINITY_DN107942_c0_g1,TRINITY_DN10888_c0_g1,TRINITY_DN109726_c0_g1,…	TRINITY_DN100388_c0_g1,TRINITY_DN100544_c0_g1,TRINITY_DN100625_c0_g1,TRINITY_DN10210_c0_g1,TRINITY_DN10210_c0_g2,TRINITY_DN10274_c0_g1,TRINITY_DN102859_c0_g1,TRINITY_DN10351_c0_g1,TRINITY_DN10380_c0_g1,TRINITY_DN104647_c0_g1,TRINITY_DN10724_c0_g1,TRINITY_DN11107_c0_g1,TRINITY_DN112613_c0_g1,TRINITY_DN11283_c1_g1,TRINITY_DN11356_c0_g1,TRINITY_DN11395_c0_g1,TRINITY_DN115576_c0_g1,TRINITY_DN11587_c0…
BP	GO:0097305	response to alcohol	107	186	293	1090	0.005	0.113577	TRINITY_DN10007_c0_g1,TRINITY_DN10157_c1_g2,TRINITY_DN10422_c0_g1,TRINITY_DN10681_c0_g1,TRINITY_DN10917_c0_g1,TRINITY_DN10918_c0_g1,TRINITY_DN1104_c0_g4,TRINITY_DN11050_c0_g1,TRINITY_DN112015_c0_g1,TRINITY_DN112830_c0_g1,TRINITY_DN113081_c0_g1,TRINITY_DN11355_c0_g1,TRINITY_DN11424_c0_g1,TRINITY_DN11519_c0_g1,TRINITY_DN11643_c0_g1,TRINITY_DN11643_c0_g2,TRINITY_DN117184_c0_g1,TRINITY_DN1171_c1_g1,T…	TRINITY_DN100633_c0_g1,TRINITY_DN10159_c0_g1,TRINITY_DN1031_c0_g1,TRINITY_DN104775_c0_g1,TRINITY_DN105270_c0_g1,TRINITY_DN10596_c0_g1,TRINITY_DN1065_c0_g1,TRINITY_DN107883_c0_g1,TRINITY_DN107992_c0_g1,TRINITY_DN108044_c0_g1,TRINITY_DN108440_c0_g1,TRINITY_DN1093_c0_g1,TRINITY_DN109508_c0_g1,TRINITY_DN110034_c0_g1,TRINITY_DN11148_c0_g1,TRINITY_DN112543_c0_g1,TRINITY_DN11302_c0_g2,TRINITY_DN11460_c0…
BP	GO:0015980	energy derivation by oxidation of organic compounds	19	81	100	336	0.00502	0.113754	TRINITY_DN10043_c0_g1,TRINITY_DN1113_c0_g3,TRINITY_DN120916_c0_g1,TRINITY_DN12224_c0_g1,TRINITY_DN123184_c0_g1,TRINITY_DN1339_c0_g1,TRINITY_DN1339_c0_g2,TRINITY_DN13600_c0_g1,TRINITY_DN17575_c0_g1,TRINITY_DN17674_c0_g1,TRINITY_DN21012_c0_g1,TRINITY_DN2773_c0_g1,TRINITY_DN3767_c0_g1,TRINITY_DN480_c0_g2,TRINITY_DN5969_c0_g2,TRINITY_DN690_c0_g2,TRINITY_DN7606_c0_g1,TRINITY_DN88908_c0_g1,TRINITY_DN95…	TRINITY_DN101674_c0_g1,TRINITY_DN10169_c0_g1,TRINITY_DN103933_c0_g1,TRINITY_DN106121_c0_g1,TRINITY_DN111266_c0_g1,TRINITY_DN117258_c0_g1,TRINITY_DN11768_c0_g1,TRINITY_DN120513_c0_g1,TRINITY_DN121430_c0_g1,TRINITY_DN123668_c0_g1,TRINITY_DN12449_c0_g1,TRINITY_DN13352_c0_g1,TRINITY_DN13373_c0_g2,TRINITY_DN13957_c1_g1,TRINITY_DN14287_c0_g1,TRINITY_DN14709_c0_g1,TRINITY_DN15522_c1_g1,TRINITY_DN16117_c…
MF	GO:0050897	cobalt ion binding	5	27	32	87	0.00506	0.114383	TRINITY_DN10563_c0_g1,TRINITY_DN130_c0_g2,TRINITY_DN6978_c0_g1,TRINITY_DN7705_c0_g1,TRINITY_DN9048_c0_g2	TRINITY_DN101036_c0_g1,TRINITY_DN10625_c0_g1,TRINITY_DN107707_c0_g1,TRINITY_DN110319_c0_g1,TRINITY_DN11490_c0_g1,TRINITY_DN116979_c0_g1,TRINITY_DN120450_c0_g1,TRINITY_DN13961_c0_g1,TRINITY_DN22128_c0_g1,TRINITY_DN22128_c0_g2,TRINITY_DN22972_c0_g1,TRINITY_DN23246_c0_g1,TRINITY_DN23910_c0_g1,TRINITY_DN30013_c0_g1,TRINITY_DN30013_c0_g2,TRINITY_DN34410_c0_g1,TRINITY_DN4308_c0_g1,TRINITY_DN46766_c0_g1…
BP	GO:0070925	organelle assembly	10	152	162	574	0.00509	0.114783	TRINITY_DN15909_c0_g1,TRINITY_DN18143_c0_g1,TRINITY_DN34070_c0_g1,TRINITY_DN35464_c0_g1,TRINITY_DN4561_c0_g2,TRINITY_DN64447_c0_g1,TRINITY_DN68479_c0_g1,TRINITY_DN6904_c0_g2,TRINITY_DN8318_c0_g1,TRINITY_DN8617_c0_g1	TRINITY_DN100728_c0_g1,TRINITY_DN100883_c0_g1,TRINITY_DN101058_c0_g1,TRINITY_DN101686_c0_g1,TRINITY_DN102348_c0_g1,TRINITY_DN102475_c0_g1,TRINITY_DN103925_c0_g1,TRINITY_DN104627_c0_g1,TRINITY_DN104775_c0_g1,TRINITY_DN106063_c0_g1,TRINITY_DN106215_c0_g1,TRINITY_DN106752_c0_g1,TRINITY_DN10815_c0_g3,TRINITY_DN108367_c0_g1,TRINITY_DN108615_c0_g1,TRINITY_DN108639_c0_g1,TRINITY_DN109069_c0_g1,TRINITY_D…
BP	GO:0000478	endonucleolytic cleavage involved in rRNA processing	0	21	21	52	0.00514	0.115631	-	TRINITY_DN100883_c0_g1,TRINITY_DN112713_c0_g1,TRINITY_DN113861_c0_g1,TRINITY_DN116373_c0_g1,TRINITY_DN116671_c0_g1,TRINITY_DN117275_c0_g1,TRINITY_DN15359_c0_g1,TRINITY_DN15384_c0_g1,TRINITY_DN16023_c0_g1,TRINITY_DN16518_c0_g1,TRINITY_DN23073_c0_g1,TRINITY_DN23073_c0_g2,TRINITY_DN23073_c1_g1,TRINITY_DN24828_c0_g1,TRINITY_DN26415_c0_g1,TRINITY_DN26612_c0_g1,TRINITY_DN29079_c0_g1,TRINITY_DN34864_c0_…
BP	GO:0007076	mitotic chromosome condensation	2	5	7	11	0.00531	0.118197	TRINITY_DN15992_c0_g1,TRINITY_DN8262_c0_g1	TRINITY_DN108916_c0_g1,TRINITY_DN21589_c0_g1,TRINITY_DN25331_c0_g1,TRINITY_DN26234_c0_g1,TRINITY_DN84752_c0_g1
BP	GO:0010257	NADH dehydrogenase complex assembly	4	3	7	11	0.00531	0.118197	TRINITY_DN20636_c0_g1,TRINITY_DN27906_c0_g1,TRINITY_DN31354_c0_g1,TRINITY_DN8860_c0_g1	TRINITY_DN26432_c0_g1,TRINITY_DN39538_c0_g1,TRINITY_DN68431_c0_g1
BP	GO:0016540	protein autoprocessing	0	7	7	11	0.00531	0.118197	-	TRINITY_DN113263_c0_g1,TRINITY_DN11712_c0_g1,TRINITY_DN13320_c0_g1,TRINITY_DN16158_c0_g1,TRINITY_DN16563_c0_g1,TRINITY_DN17752_c0_g1,TRINITY_DN49402_c0_g1
MF	GO:0070181	small ribosomal subunit rRNA binding	0	13	13	27	0.00532	0.118197	-	TRINITY_DN112444_c0_g1,TRINITY_DN120391_c0_g1,TRINITY_DN13312_c0_g2,TRINITY_DN14530_c0_g1,TRINITY_DN14839_c0_g1,TRINITY_DN15660_c0_g1,TRINITY_DN17077_c0_g1,TRINITY_DN20664_c0_g2,TRINITY_DN25160_c0_g1,TRINITY_DN29065_c0_g1,TRINITY_DN34781_c0_g3,TRINITY_DN54426_c0_g1,TRINITY_DN93383_c0_g1
BP	GO:0006855	drug transmembrane transport	21	54	75	243	0.00533	0.118197	TRINITY_DN10248_c0_g3,TRINITY_DN10918_c0_g1,TRINITY_DN13837_c0_g1,TRINITY_DN13916_c0_g1,TRINITY_DN14577_c0_g1,TRINITY_DN14888_c0_g1,TRINITY_DN18190_c0_g1,TRINITY_DN20894_c0_g1,TRINITY_DN2248_c1_g1,TRINITY_DN23883_c0_g1,TRINITY_DN2393_c2_g1,TRINITY_DN2456_c0_g1,TRINITY_DN3110_c0_g1,TRINITY_DN31243_c0_g1,TRINITY_DN35455_c0_g1,TRINITY_DN4315_c0_g1,TRINITY_DN4762_c0_g1,TRINITY_DN5399_c0_g1,TRINITY_DN…	TRINITY_DN104516_c0_g1,TRINITY_DN109375_c0_g1,TRINITY_DN11072_c0_g1,TRINITY_DN11367_c0_g1,TRINITY_DN11791_c0_g1,TRINITY_DN11920_c0_g1,TRINITY_DN12505_c0_g1,TRINITY_DN13663_c0_g1,TRINITY_DN14337_c4_g1,TRINITY_DN14481_c0_g1,TRINITY_DN14689_c0_g1,TRINITY_DN15017_c0_g1,TRINITY_DN15295_c0_g1,TRINITY_DN15840_c0_g1,TRINITY_DN16150_c1_g1,TRINITY_DN17007_c0_g1,TRINITY_DN17400_c0_g1,TRINITY_DN178_c1_g1,TRI…
BP	GO:0071229	cellular response to acid chemical	97	162	259	956	0.00533	0.118197	TRINITY_DN10007_c0_g1,TRINITY_DN10157_c1_g2,TRINITY_DN1026_c0_g1,TRINITY_DN10301_c0_g1,TRINITY_DN10462_c0_g1,TRINITY_DN10681_c0_g1,TRINITY_DN10917_c0_g1,TRINITY_DN10975_c0_g1,TRINITY_DN10975_c0_g2,TRINITY_DN10981_c0_g1,TRINITY_DN11050_c0_g1,TRINITY_DN111968_c0_g1,TRINITY_DN113081_c0_g1,TRINITY_DN11643_c0_g1,TRINITY_DN11643_c0_g2,TRINITY_DN117184_c0_g1,TRINITY_DN11938_c0_g1,TRINITY_DN12030_c0_g1,T…	TRINITY_DN100633_c0_g1,TRINITY_DN10159_c0_g1,TRINITY_DN1031_c0_g1,TRINITY_DN104775_c0_g1,TRINITY_DN105270_c0_g1,TRINITY_DN10591_c0_g1,TRINITY_DN1065_c0_g1,TRINITY_DN107883_c0_g1,TRINITY_DN108044_c0_g1,TRINITY_DN1093_c0_g1,TRINITY_DN110034_c0_g1,TRINITY_DN11302_c0_g2,TRINITY_DN11460_c0_g1,TRINITY_DN115350_c0_g1,TRINITY_DN11548_c0_g1,TRINITY_DN11783_c0_g1,TRINITY_DN11989_c0_g2,TRINITY_DN12046_c0_g2…
MF	GO:0019843	rRNA binding	4	83	87	283	0.00538	0.118742	TRINITY_DN12102_c0_g1,TRINITY_DN12102_c0_g2,TRINITY_DN12272_c1_g1,TRINITY_DN13433_c1_g3	TRINITY_DN104438_c0_g1,TRINITY_DN106215_c0_g1,TRINITY_DN106977_c0_g1,TRINITY_DN108558_c0_g1,TRINITY_DN108615_c0_g1,TRINITY_DN109069_c0_g1,TRINITY_DN109118_c0_g1,TRINITY_DN112135_c0_g1,TRINITY_DN112224_c0_g1,TRINITY_DN112444_c0_g1,TRINITY_DN114016_c0_g1,TRINITY_DN114076_c0_g1,TRINITY_DN114211_c0_g1,TRINITY_DN115250_c0_g1,TRINITY_DN11623_c0_g1,TRINITY_DN11623_c1_g1,TRINITY_DN117323_c0_g1,TRINITY_DN…
CC	GO:0005858	axonemal dynein complex	0	10	10	19	0.00538	0.118742	-	TRINITY_DN10023_c2_g1,TRINITY_DN10616_c0_g1,TRINITY_DN11323_c1_g1,TRINITY_DN18243_c0_g1,TRINITY_DN18243_c0_g2,TRINITY_DN18638_c0_g1,TRINITY_DN18638_c0_g3,TRINITY_DN23097_c0_g1,TRINITY_DN9756_c0_g1,TRINITY_DN9756_c2_g3
BP	GO:0043467	regulation of generation of precursor metabolites and energy	5	19	24	62	0.00548	0.120663	TRINITY_DN10681_c0_g1,TRINITY_DN2651_c0_g1,TRINITY_DN4703_c1_g1,TRINITY_DN651_c0_g1,TRINITY_DN8596_c0_g1	TRINITY_DN100955_c0_g1,TRINITY_DN104775_c0_g1,TRINITY_DN12219_c0_g1,TRINITY_DN13373_c0_g2,TRINITY_DN13381_c0_g3,TRINITY_DN13640_c0_g1,TRINITY_DN17168_c0_g1,TRINITY_DN17802_c0_g1,TRINITY_DN25349_c0_g3,TRINITY_DN27039_c0_g1,TRINITY_DN36027_c0_g2,TRINITY_DN37071_c0_g1,TRINITY_DN37_c0_g1,TRINITY_DN45525_c0_g1,TRINITY_DN8254_c0_g1,TRINITY_DN8889_c0_g2,TRINITY_DN9341_c0_g1,TRINITY_DN9726_c0_g1,TRINITY_…
MF	GO:0015276	ligand-gated ion channel activity	5	12	17	39	0.00551	0.12069	TRINITY_DN12484_c0_g1,TRINITY_DN24232_c0_g1,TRINITY_DN33782_c0_g1,TRINITY_DN56287_c0_g2,TRINITY_DN8237_c0_g1	TRINITY_DN11989_c0_g2,TRINITY_DN12066_c0_g1,TRINITY_DN19936_c1_g1,TRINITY_DN24232_c0_g2,TRINITY_DN3625_c0_g1,TRINITY_DN3750_c0_g1,TRINITY_DN3750_c1_g2,TRINITY_DN3750_c1_g3,TRINITY_DN5289_c0_g1,TRINITY_DN54860_c0_g1,TRINITY_DN6518_c0_g1,TRINITY_DN8183_c0_g3
MF	GO:0022834	ligand-gated channel activity	5	12	17	39	0.00551	0.12069	TRINITY_DN12484_c0_g1,TRINITY_DN24232_c0_g1,TRINITY_DN33782_c0_g1,TRINITY_DN56287_c0_g2,TRINITY_DN8237_c0_g1	TRINITY_DN11989_c0_g2,TRINITY_DN12066_c0_g1,TRINITY_DN19936_c1_g1,TRINITY_DN24232_c0_g2,TRINITY_DN3625_c0_g1,TRINITY_DN3750_c0_g1,TRINITY_DN3750_c1_g2,TRINITY_DN3750_c1_g3,TRINITY_DN5289_c0_g1,TRINITY_DN54860_c0_g1,TRINITY_DN6518_c0_g1,TRINITY_DN8183_c0_g3
MF	GO:0016620	oxidoreductase activity, acting on the aldehyde or oxo group of donors, NAD or NADP as acceptor	13	36	49	146	0.00552	0.12069	TRINITY_DN10004_c0_g1,TRINITY_DN10563_c0_g1,TRINITY_DN1094_c0_g1,TRINITY_DN16568_c0_g1,TRINITY_DN25281_c0_g1,TRINITY_DN2541_c0_g1,TRINITY_DN357_c0_g1,TRINITY_DN46429_c0_g1,TRINITY_DN76730_c0_g1,TRINITY_DN9463_c0_g1,TRINITY_DN947_c0_g1,TRINITY_DN9659_c0_g1,TRINITY_DN9808_c0_g1	TRINITY_DN11057_c0_g1,TRINITY_DN11577_c0_g1,TRINITY_DN11577_c0_g2,TRINITY_DN11577_c0_g3,TRINITY_DN116721_c0_g1,TRINITY_DN118773_c0_g1,TRINITY_DN121186_c0_g1,TRINITY_DN12747_c0_g1,TRINITY_DN19026_c0_g1,TRINITY_DN20656_c0_g1,TRINITY_DN21181_c0_g1,TRINITY_DN22196_c0_g1,TRINITY_DN22769_c0_g1,TRINITY_DN23180_c0_g1,TRINITY_DN2475_c0_g1,TRINITY_DN2475_c0_g2,TRINITY_DN26480_c0_g1,TRINITY_DN27818_c0_g1,TR…
MF	GO:0005345	purine nucleobase transmembrane transporter activity	1	8	9	16	0.00555	0.121063	TRINITY_DN630_c0_g1	TRINITY_DN11072_c0_g1,TRINITY_DN12100_c0_g1,TRINITY_DN15394_c0_g1,TRINITY_DN20863_c0_g1,TRINITY_DN2304_c0_g1,TRINITY_DN2614_c0_g1,TRINITY_DN69365_c1_g1,TRINITY_DN937_c0_g1
BP	GO:0070838	divalent metal ion transport	19	51	70	225	0.00563	0.122119	TRINITY_DN112480_c0_g1,TRINITY_DN11519_c0_g1,TRINITY_DN11997_c0_g1,TRINITY_DN12200_c0_g2,TRINITY_DN12484_c0_g1,TRINITY_DN1546_c2_g1,TRINITY_DN1578_c0_g1,TRINITY_DN20195_c0_g1,TRINITY_DN23952_c0_g1,TRINITY_DN24232_c0_g1,TRINITY_DN25890_c0_g1,TRINITY_DN30598_c0_g1,TRINITY_DN33782_c0_g1,TRINITY_DN5721_c0_g2,TRINITY_DN5756_c1_g1,TRINITY_DN605_c0_g1,TRINITY_DN6652_c0_g1,TRINITY_DN7127_c0_g3,TRINITY_DN…	TRINITY_DN103925_c0_g1,TRINITY_DN11499_c0_g1,TRINITY_DN116465_c0_g1,TRINITY_DN11989_c0_g2,TRINITY_DN12066_c0_g1,TRINITY_DN15758_c0_g1,TRINITY_DN16785_c0_g2,TRINITY_DN17484_c0_g1,TRINITY_DN18205_c0_g1,TRINITY_DN18660_c0_g1,TRINITY_DN18660_c0_g2,TRINITY_DN19654_c0_g2,TRINITY_DN20246_c0_g1,TRINITY_DN21708_c0_g1,TRINITY_DN22492_c0_g1,TRINITY_DN22777_c0_g1,TRINITY_DN23944_c0_g1,TRINITY_DN24107_c0_g1,T…
BP	GO:0009135	purine nucleoside diphosphate metabolic process	8	53	61	192	0.00566	0.122119	TRINITY_DN11424_c0_g1,TRINITY_DN11424_c0_g2,TRINITY_DN15968_c0_g1,TRINITY_DN16711_c0_g1,TRINITY_DN18403_c0_g1,TRINITY_DN20713_c0_g1,TRINITY_DN480_c0_g2,TRINITY_DN8791_c0_g1	TRINITY_DN100563_c0_g1,TRINITY_DN104775_c0_g1,TRINITY_DN10761_c0_g1,TRINITY_DN107707_c0_g1,TRINITY_DN11577_c0_g1,TRINITY_DN116721_c0_g1,TRINITY_DN116881_c0_g1,TRINITY_DN118773_c0_g1,TRINITY_DN13293_c0_g1,TRINITY_DN13640_c0_g1,TRINITY_DN13783_c0_g2,TRINITY_DN15111_c0_g1,TRINITY_DN1637_c0_g1,TRINITY_DN16476_c0_g1,TRINITY_DN17334_c1_g1,TRINITY_DN18919_c0_g1,TRINITY_DN21146_c0_g2,TRINITY_DN21146_c1_g…
BP	GO:0009179	purine ribonucleoside diphosphate metabolic process	8	53	61	192	0.00566	0.122119	TRINITY_DN11424_c0_g1,TRINITY_DN11424_c0_g2,TRINITY_DN15968_c0_g1,TRINITY_DN16711_c0_g1,TRINITY_DN18403_c0_g1,TRINITY_DN20713_c0_g1,TRINITY_DN480_c0_g2,TRINITY_DN8791_c0_g1	TRINITY_DN100563_c0_g1,TRINITY_DN104775_c0_g1,TRINITY_DN10761_c0_g1,TRINITY_DN107707_c0_g1,TRINITY_DN11577_c0_g1,TRINITY_DN116721_c0_g1,TRINITY_DN116881_c0_g1,TRINITY_DN118773_c0_g1,TRINITY_DN13293_c0_g1,TRINITY_DN13640_c0_g1,TRINITY_DN13783_c0_g2,TRINITY_DN15111_c0_g1,TRINITY_DN1637_c0_g1,TRINITY_DN16476_c0_g1,TRINITY_DN17334_c1_g1,TRINITY_DN18919_c0_g1,TRINITY_DN21146_c0_g2,TRINITY_DN21146_c1_g…
BP	GO:0009185	ribonucleoside diphosphate metabolic process	8	53	61	192	0.00566	0.122119	TRINITY_DN11424_c0_g1,TRINITY_DN11424_c0_g2,TRINITY_DN15968_c0_g1,TRINITY_DN16711_c0_g1,TRINITY_DN18403_c0_g1,TRINITY_DN20713_c0_g1,TRINITY_DN480_c0_g2,TRINITY_DN8791_c0_g1	TRINITY_DN100563_c0_g1,TRINITY_DN104775_c0_g1,TRINITY_DN10761_c0_g1,TRINITY_DN107707_c0_g1,TRINITY_DN11577_c0_g1,TRINITY_DN116721_c0_g1,TRINITY_DN116881_c0_g1,TRINITY_DN118773_c0_g1,TRINITY_DN13293_c0_g1,TRINITY_DN13640_c0_g1,TRINITY_DN13783_c0_g2,TRINITY_DN15111_c0_g1,TRINITY_DN1637_c0_g1,TRINITY_DN16476_c0_g1,TRINITY_DN17334_c1_g1,TRINITY_DN18919_c0_g1,TRINITY_DN21146_c0_g2,TRINITY_DN21146_c1_g…
BP	GO:0033993	response to lipid	145	224	369	1397	0.00568	0.122119	TRINITY_DN10007_c0_g1,TRINITY_DN100869_c0_g1,TRINITY_DN10157_c1_g2,TRINITY_DN10301_c0_g1,TRINITY_DN103505_c0_g1,TRINITY_DN10422_c0_g1,TRINITY_DN10462_c0_g1,TRINITY_DN10681_c0_g1,TRINITY_DN10917_c0_g1,TRINITY_DN10918_c0_g1,TRINITY_DN10979_c0_g1,TRINITY_DN1104_c0_g4,TRINITY_DN11050_c0_g1,TRINITY_DN112015_c0_g1,TRINITY_DN112830_c0_g1,TRINITY_DN113081_c0_g1,TRINITY_DN11355_c0_g1,TRINITY_DN11424_c0_g1…	TRINITY_DN100633_c0_g1,TRINITY_DN10159_c0_g1,TRINITY_DN1031_c0_g1,TRINITY_DN10384_c0_g1,TRINITY_DN1045_c0_g1,TRINITY_DN104775_c0_g1,TRINITY_DN105270_c0_g1,TRINITY_DN10591_c0_g1,TRINITY_DN10596_c0_g1,TRINITY_DN1065_c0_g1,TRINITY_DN107883_c0_g1,TRINITY_DN107992_c0_g1,TRINITY_DN108044_c0_g1,TRINITY_DN1093_c0_g1,TRINITY_DN109508_c0_g1,TRINITY_DN110034_c0_g1,TRINITY_DN112543_c0_g1,TRINITY_DN11302_c0_g…
BP	GO:0035336	long-chain fatty-acyl-CoA metabolic process	0	10	10	19	0.00569	0.122119	-	TRINITY_DN12747_c0_g1,TRINITY_DN21181_c0_g1,TRINITY_DN23047_c0_g2,TRINITY_DN23180_c0_g1,TRINITY_DN2475_c0_g1,TRINITY_DN2475_c0_g2,TRINITY_DN56475_c0_g1,TRINITY_DN59168_c0_g1,TRINITY_DN7382_c0_g1,TRINITY_DN9043_c0_g1
BP	GO:0071493	cellular response to UV-B	1	9	10	19	0.00569	0.122119	TRINITY_DN36167_c0_g1	TRINITY_DN101686_c0_g1,TRINITY_DN112785_c0_g1,TRINITY_DN116291_c0_g1,TRINITY_DN14247_c0_g2,TRINITY_DN17482_c0_g2,TRINITY_DN28073_c0_g1,TRINITY_DN4250_c0_g1,TRINITY_DN7418_c0_g1,TRINITY_DN90485_c0_g1
BP	GO:0018107	peptidyl-threonine phosphorylation	7	16	23	59	0.00586	0.12399	TRINITY_DN10853_c0_g1,TRINITY_DN10853_c0_g2,TRINITY_DN112014_c0_g1,TRINITY_DN15358_c0_g1,TRINITY_DN15711_c0_g1,TRINITY_DN1901_c0_g1,TRINITY_DN1901_c0_g2	TRINITY_DN13225_c0_g1,TRINITY_DN15380_c0_g1,TRINITY_DN17227_c0_g2,TRINITY_DN19165_c0_g1,TRINITY_DN19246_c0_g1,TRINITY_DN20653_c0_g1,TRINITY_DN20790_c1_g1,TRINITY_DN20823_c0_g1,TRINITY_DN2216_c0_g1,TRINITY_DN276_c2_g1,TRINITY_DN32071_c0_g1,TRINITY_DN42167_c0_g1,TRINITY_DN61700_c0_g1,TRINITY_DN64265_c0_g1,TRINITY_DN85146_c0_g1,TRINITY_DN98664_c0_g2
BP	GO:0018210	peptidyl-threonine modification	7	16	23	59	0.00586	0.12399	TRINITY_DN10853_c0_g1,TRINITY_DN10853_c0_g2,TRINITY_DN112014_c0_g1,TRINITY_DN15358_c0_g1,TRINITY_DN15711_c0_g1,TRINITY_DN1901_c0_g1,TRINITY_DN1901_c0_g2	TRINITY_DN13225_c0_g1,TRINITY_DN15380_c0_g1,TRINITY_DN17227_c0_g2,TRINITY_DN19165_c0_g1,TRINITY_DN19246_c0_g1,TRINITY_DN20653_c0_g1,TRINITY_DN20790_c1_g1,TRINITY_DN20823_c0_g1,TRINITY_DN2216_c0_g1,TRINITY_DN276_c2_g1,TRINITY_DN32071_c0_g1,TRINITY_DN42167_c0_g1,TRINITY_DN61700_c0_g1,TRINITY_DN64265_c0_g1,TRINITY_DN85146_c0_g1,TRINITY_DN98664_c0_g2
BP	GO:0055072	iron ion homeostasis	7	22	29	79	0.00589	0.12399	TRINITY_DN10918_c0_g1,TRINITY_DN13916_c0_g1,TRINITY_DN15097_c0_g1,TRINITY_DN2125_c0_g2,TRINITY_DN31832_c0_g1,TRINITY_DN40055_c0_g1,TRINITY_DN605_c0_g1	TRINITY_DN100009_c0_g1,TRINITY_DN10229_c0_g1,TRINITY_DN12785_c0_g1,TRINITY_DN12785_c0_g2,TRINITY_DN18688_c0_g2,TRINITY_DN21689_c0_g1,TRINITY_DN21708_c0_g1,TRINITY_DN2422_c0_g1,TRINITY_DN3091_c0_g1,TRINITY_DN4051_c0_g1,TRINITY_DN4051_c0_g2,TRINITY_DN4213_c0_g1,TRINITY_DN4377_c0_g1,TRINITY_DN4377_c0_g2,TRINITY_DN52705_c0_g1,TRINITY_DN5459_c0_g1,TRINITY_DN5459_c0_g2,TRINITY_DN58398_c0_g2,TRINITY_DN6…
MF	GO:0015173	aromatic amino acid transmembrane transporter activity	2	5	7	11	0.0059	0.12399	TRINITY_DN2112_c0_g1,TRINITY_DN4031_c0_g1	TRINITY_DN104516_c0_g1,TRINITY_DN21419_c0_g1,TRINITY_DN28419_c0_g1,TRINITY_DN57065_c0_g1,TRINITY_DN97954_c0_g1
MF	GO:0016661	oxidoreductase activity, acting on other nitrogenous compounds as donors	0	7	7	11	0.0059	0.12399	-	TRINITY_DN114002_c0_g1,TRINITY_DN14555_c0_g1,TRINITY_DN19162_c0_g1,TRINITY_DN24015_c0_g1,TRINITY_DN5687_c0_g1,TRINITY_DN602_c0_g1,TRINITY_DN72756_c0_g1
MF	GO:0047259	glucomannan 4-beta-mannosyltransferase activity	1	6	7	11	0.0059	0.12399	TRINITY_DN10470_c0_g1	TRINITY_DN12201_c0_g1,TRINITY_DN12201_c1_g1,TRINITY_DN1727_c2_g1,TRINITY_DN19809_c0_g1,TRINITY_DN4690_c0_g1,TRINITY_DN901_c0_g1
MF	GO:0015267	channel activity	32	58	90	295	0.00591	0.12399	TRINITY_DN107776_c0_g1,TRINITY_DN11387_c0_g1,TRINITY_DN11693_c0_g2,TRINITY_DN12484_c0_g1,TRINITY_DN12664_c0_g1,TRINITY_DN14540_c0_g1,TRINITY_DN14920_c0_g1,TRINITY_DN16551_c1_g1,TRINITY_DN16702_c0_g1,TRINITY_DN20195_c0_g1,TRINITY_DN21630_c0_g1,TRINITY_DN23883_c0_g1,TRINITY_DN24232_c0_g1,TRINITY_DN24391_c0_g1,TRINITY_DN25890_c0_g1,TRINITY_DN2737_c0_g1,TRINITY_DN273_c0_g1,TRINITY_DN28431_c0_g1,TRINI…	TRINITY_DN107701_c0_g1,TRINITY_DN113408_c0_g1,TRINITY_DN1169_c0_g1,TRINITY_DN1169_c0_g2,TRINITY_DN11989_c0_g2,TRINITY_DN12066_c0_g1,TRINITY_DN12069_c0_g1,TRINITY_DN12069_c0_g3,TRINITY_DN12336_c0_g1,TRINITY_DN14481_c0_g1,TRINITY_DN14689_c0_g1,TRINITY_DN15900_c0_g1,TRINITY_DN15900_c1_g1,TRINITY_DN15991_c0_g1,TRINITY_DN16643_c0_g1,TRINITY_DN178_c1_g1,TRINITY_DN18075_c0_g1,TRINITY_DN18355_c0_g1,TRINI…
MF	GO:0022803	passive transmembrane transporter activity	32	58	90	295	0.00591	0.12399	TRINITY_DN107776_c0_g1,TRINITY_DN11387_c0_g1,TRINITY_DN11693_c0_g2,TRINITY_DN12484_c0_g1,TRINITY_DN12664_c0_g1,TRINITY_DN14540_c0_g1,TRINITY_DN14920_c0_g1,TRINITY_DN16551_c1_g1,TRINITY_DN16702_c0_g1,TRINITY_DN20195_c0_g1,TRINITY_DN21630_c0_g1,TRINITY_DN23883_c0_g1,TRINITY_DN24232_c0_g1,TRINITY_DN24391_c0_g1,TRINITY_DN25890_c0_g1,TRINITY_DN2737_c0_g1,TRINITY_DN273_c0_g1,TRINITY_DN28431_c0_g1,TRINI…	TRINITY_DN107701_c0_g1,TRINITY_DN113408_c0_g1,TRINITY_DN1169_c0_g1,TRINITY_DN1169_c0_g2,TRINITY_DN11989_c0_g2,TRINITY_DN12066_c0_g1,TRINITY_DN12069_c0_g1,TRINITY_DN12069_c0_g3,TRINITY_DN12336_c0_g1,TRINITY_DN14481_c0_g1,TRINITY_DN14689_c0_g1,TRINITY_DN15900_c0_g1,TRINITY_DN15900_c1_g1,TRINITY_DN15991_c0_g1,TRINITY_DN16643_c0_g1,TRINITY_DN178_c1_g1,TRINITY_DN18075_c0_g1,TRINITY_DN18355_c0_g1,TRINI…
BP	GO:0019725	cellular homeostasis	39	124	163	580	0.00591	0.12399	TRINITY_DN10019_c0_g1,TRINITY_DN11262_c0_g1,TRINITY_DN11382_c0_g1,TRINITY_DN12200_c0_g2,TRINITY_DN12266_c0_g1,TRINITY_DN1339_c0_g1,TRINITY_DN1339_c0_g2,TRINITY_DN13916_c0_g1,TRINITY_DN14617_c0_g1,TRINITY_DN14920_c0_g1,TRINITY_DN15850_c0_g1,TRINITY_DN16711_c0_g1,TRINITY_DN18403_c0_g1,TRINITY_DN2054_c0_g1,TRINITY_DN21012_c0_g1,TRINITY_DN22940_c0_g1,TRINITY_DN24472_c0_g1,TRINITY_DN24472_c0_g2,TRINIT…	TRINITY_DN100009_c0_g1,TRINITY_DN100489_c0_g1,TRINITY_DN100955_c0_g1,TRINITY_DN101036_c0_g1,TRINITY_DN101214_c0_g1,TRINITY_DN101548_c0_g1,TRINITY_DN103891_c0_g1,TRINITY_DN104775_c0_g1,TRINITY_DN10761_c0_g1,TRINITY_DN107924_c0_g1,TRINITY_DN112613_c0_g1,TRINITY_DN112786_c0_g1,TRINITY_DN114147_c0_g1,TRINITY_DN11490_c0_g1,TRINITY_DN116465_c0_g1,TRINITY_DN117742_c0_g1,TRINITY_DN120450_c0_g1,TRINITY_DN…
BP	GO:0009267	cellular response to starvation	31	59	90	300	0.00591	0.12399	TRINITY_DN10019_c0_g1,TRINITY_DN10301_c0_g1,TRINITY_DN110770_c0_g1,TRINITY_DN130_c0_g2,TRINITY_DN13916_c0_g1,TRINITY_DN18143_c0_g1,TRINITY_DN1906_c0_g1,TRINITY_DN23656_c0_g1,TRINITY_DN32951_c0_g1,TRINITY_DN35814_c0_g2,TRINITY_DN3666_c0_g1,TRINITY_DN4098_c0_g1,TRINITY_DN506_c0_g3,TRINITY_DN5410_c0_g1,TRINITY_DN5655_c0_g1,TRINITY_DN5709_c0_g1,TRINITY_DN5727_c1_g1,TRINITY_DN5770_c0_g1,TRINITY_DN6291…	TRINITY_DN101081_c0_g1,TRINITY_DN10169_c0_g1,TRINITY_DN1038_c0_g1,TRINITY_DN104775_c0_g1,TRINITY_DN10802_c0_g1,TRINITY_DN110319_c0_g1,TRINITY_DN11148_c0_g1,TRINITY_DN11383_c0_g1,TRINITY_DN11395_c0_g1,TRINITY_DN11604_c0_g3,TRINITY_DN120800_c0_g1,TRINITY_DN120925_c0_g1,TRINITY_DN12259_c0_g1,TRINITY_DN123064_c0_g1,TRINITY_DN12356_c0_g1,TRINITY_DN13225_c0_g1,TRINITY_DN13640_c0_g1,TRINITY_DN13662_c0_g…
BP	GO:0042126	nitrate metabolic process	5	21	26	69	0.00598	0.124898	TRINITY_DN10895_c0_g1,TRINITY_DN16716_c0_g1,TRINITY_DN26223_c0_g1,TRINITY_DN7588_c0_g1,TRINITY_DN8217_c0_g1	TRINITY_DN10994_c0_g1,TRINITY_DN114002_c0_g1,TRINITY_DN16898_c0_g1,TRINITY_DN18440_c0_g1,TRINITY_DN19162_c0_g1,TRINITY_DN19167_c1_g1,TRINITY_DN22046_c0_g2,TRINITY_DN23519_c0_g1,TRINITY_DN2692_c0_g1,TRINITY_DN289_c0_g1,TRINITY_DN36941_c0_g1,TRINITY_DN3970_c0_g1,TRINITY_DN3970_c1_g1,TRINITY_DN3970_c1_g2,TRINITY_DN42739_c0_g1,TRINITY_DN4641_c0_g1,TRINITY_DN5154_c0_g1,TRINITY_DN5687_c0_g1,TRINITY_DN6…
BP	GO:0042128	nitrate assimilation	5	21	26	69	0.00598	0.124898	TRINITY_DN10895_c0_g1,TRINITY_DN16716_c0_g1,TRINITY_DN26223_c0_g1,TRINITY_DN7588_c0_g1,TRINITY_DN8217_c0_g1	TRINITY_DN10994_c0_g1,TRINITY_DN114002_c0_g1,TRINITY_DN16898_c0_g1,TRINITY_DN18440_c0_g1,TRINITY_DN19162_c0_g1,TRINITY_DN19167_c1_g1,TRINITY_DN22046_c0_g2,TRINITY_DN23519_c0_g1,TRINITY_DN2692_c0_g1,TRINITY_DN289_c0_g1,TRINITY_DN36941_c0_g1,TRINITY_DN3970_c0_g1,TRINITY_DN3970_c1_g1,TRINITY_DN3970_c1_g2,TRINITY_DN42739_c0_g1,TRINITY_DN4641_c0_g1,TRINITY_DN5154_c0_g1,TRINITY_DN5687_c0_g1,TRINITY_DN6…
BP	GO:0016051	carbohydrate biosynthetic process	59	107	166	592	0.00604	0.125869	TRINITY_DN10427_c0_g1,TRINITY_DN11080_c1_g1,TRINITY_DN112015_c0_g1,TRINITY_DN11424_c0_g1,TRINITY_DN11424_c0_g2,TRINITY_DN11597_c0_g1,TRINITY_DN11701_c0_g1,TRINITY_DN120433_c0_g1,TRINITY_DN12221_c0_g1,TRINITY_DN12293_c0_g1,TRINITY_DN123184_c0_g1,TRINITY_DN12594_c0_g1,TRINITY_DN13034_c0_g1,TRINITY_DN13114_c0_g1,TRINITY_DN1339_c0_g1,TRINITY_DN1339_c0_g2,TRINITY_DN13814_c0_g1,TRINITY_DN15968_c0_g1,TR…	TRINITY_DN100563_c0_g1,TRINITY_DN100601_c0_g1,TRINITY_DN101361_c0_g1,TRINITY_DN10425_c1_g1,TRINITY_DN104775_c0_g1,TRINITY_DN111250_c0_g1,TRINITY_DN11250_c0_g1,TRINITY_DN11293_c0_g1,TRINITY_DN11577_c0_g2,TRINITY_DN11577_c0_g3,TRINITY_DN11604_c0_g3,TRINITY_DN116862_c0_g1,TRINITY_DN116881_c0_g1,TRINITY_DN11768_c0_g1,TRINITY_DN120925_c0_g1,TRINITY_DN121430_c0_g1,TRINITY_DN12356_c0_g1,TRINITY_DN13082_…
MF	GO:0005507	copper ion binding	23	86	109	366	0.00608	0.126421	TRINITY_DN112040_c0_g1,TRINITY_DN11519_c0_g1,TRINITY_DN12993_c0_g1,TRINITY_DN130_c0_g2,TRINITY_DN13826_c0_g1,TRINITY_DN15420_c0_g4,TRINITY_DN16386_c0_g1,TRINITY_DN17030_c0_g1,TRINITY_DN2054_c0_g1,TRINITY_DN22597_c0_g1,TRINITY_DN26635_c0_g1,TRINITY_DN31702_c0_g1,TRINITY_DN3201_c0_g1,TRINITY_DN4068_c0_g1,TRINITY_DN4833_c0_g1,TRINITY_DN5558_c0_g1,TRINITY_DN6063_c4_g1,TRINITY_DN60954_c0_g1,TRINITY_DN…	TRINITY_DN10773_c0_g1,TRINITY_DN108337_c0_g1,TRINITY_DN109180_c0_g1,TRINITY_DN10994_c0_g1,TRINITY_DN110319_c0_g1,TRINITY_DN11250_c0_g1,TRINITY_DN112679_c0_g1,TRINITY_DN112911_c0_g1,TRINITY_DN113810_c0_g1,TRINITY_DN11392_c0_g1,TRINITY_DN121757_c0_g1,TRINITY_DN123668_c0_g1,TRINITY_DN14117_c0_g1,TRINITY_DN15019_c0_g1,TRINITY_DN15019_c0_g2,TRINITY_DN15922_c0_g1,TRINITY_DN16056_c0_g1,TRINITY_DN16476_c…
CC	GO:0009654	photosystem II oxygen evolving complex	7	8	15	34	0.00611	0.126762	TRINITY_DN15381_c0_g1,TRINITY_DN15733_c0_g1,TRINITY_DN17478_c0_g1,TRINITY_DN2651_c0_g1,TRINITY_DN44320_c0_g1,TRINITY_DN4685_c0_g1,TRINITY_DN6257_c0_g1	TRINITY_DN14608_c0_g2,TRINITY_DN17652_c0_g1,TRINITY_DN17929_c0_g1,TRINITY_DN29460_c0_g1,TRINITY_DN32653_c0_g1,TRINITY_DN7129_c0_g1,TRINITY_DN9726_c0_g1,TRINITY_DN9726_c0_g2
BP	GO:0035235	ionotropic glutamate receptor signaling pathway	2	9	11	22	0.00621	0.128551	TRINITY_DN12484_c0_g1,TRINITY_DN24232_c0_g1	TRINITY_DN11989_c0_g2,TRINITY_DN12066_c0_g1,TRINITY_DN24232_c0_g2,TRINITY_DN3625_c0_g1,TRINITY_DN3750_c0_g1,TRINITY_DN3750_c1_g2,TRINITY_DN3750_c1_g3,TRINITY_DN5289_c0_g1,TRINITY_DN8183_c0_g3
MF	GO:0016208	AMP binding	3	7	10	19	0.0065	0.134257	TRINITY_DN121665_c0_g1,TRINITY_DN37656_c0_g1,TRINITY_DN4446_c0_g2	TRINITY_DN1107_c0_g1,TRINITY_DN13793_c0_g1,TRINITY_DN30457_c0_g1,TRINITY_DN30457_c0_g3,TRINITY_DN4446_c0_g1,TRINITY_DN72850_c0_g1,TRINITY_DN8291_c0_g1
BP	GO:0071482	cellular response to light stimulus	39	43	82	271	0.00655	0.134991	TRINITY_DN10301_c0_g1,TRINITY_DN103505_c0_g1,TRINITY_DN10462_c0_g1,TRINITY_DN116417_c0_g1,TRINITY_DN12003_c0_g1,TRINITY_DN12408_c0_g1,TRINITY_DN12679_c0_g1,TRINITY_DN13151_c0_g1,TRINITY_DN1339_c0_g1,TRINITY_DN1339_c0_g2,TRINITY_DN13408_c0_g1,TRINITY_DN13408_c0_g2,TRINITY_DN14351_c0_g1,TRINITY_DN16830_c0_g1,TRINITY_DN1709_c1_g1,TRINITY_DN17540_c0_g1,TRINITY_DN19801_c0_g1,TRINITY_DN20489_c0_g1,TRIN…	TRINITY_DN10142_c0_g1,TRINITY_DN101686_c0_g1,TRINITY_DN103938_c0_g1,TRINITY_DN111059_c0_g1,TRINITY_DN112146_c0_g1,TRINITY_DN112785_c0_g1,TRINITY_DN11302_c0_g2,TRINITY_DN114100_c0_g1,TRINITY_DN116291_c0_g1,TRINITY_DN11971_c0_g1,TRINITY_DN121430_c0_g1,TRINITY_DN123023_c0_g1,TRINITY_DN14247_c0_g2,TRINITY_DN17482_c0_g2,TRINITY_DN18903_c0_g1,TRINITY_DN18956_c0_g2,TRINITY_DN19298_c0_g1,TRINITY_DN19316_…
BP	GO:1900376	regulation of secondary metabolite biosynthetic process	9	6	15	34	0.00658	0.13531	TRINITY_DN11597_c0_g1,TRINITY_DN120433_c0_g1,TRINITY_DN15640_c0_g1,TRINITY_DN3060_c0_g4,TRINITY_DN3666_c0_g1,TRINITY_DN506_c0_g3,TRINITY_DN6967_c0_g1,TRINITY_DN8700_c0_g1,TRINITY_DN8700_c1_g1	TRINITY_DN11293_c0_g1,TRINITY_DN4051_c0_g1,TRINITY_DN4051_c0_g2,TRINITY_DN4164_c0_g2,TRINITY_DN4485_c1_g1,TRINITY_DN5432_c0_g2
BP	GO:0009625	response to insect	9	5	14	31	0.00666	0.136355	TRINITY_DN11008_c0_g1,TRINITY_DN13132_c0_g1,TRINITY_DN1409_c0_g1,TRINITY_DN205_c0_g1,TRINITY_DN21826_c0_g1,TRINITY_DN3666_c0_g1,TRINITY_DN506_c0_g3,TRINITY_DN6502_c0_g1,TRINITY_DN8633_c0_g1	TRINITY_DN11783_c0_g1,TRINITY_DN3595_c0_g2,TRINITY_DN4001_c0_g1,TRINITY_DN4089_c0_g1,TRINITY_DN4164_c0_g2
BP	GO:0042761	very long-chain fatty acid biosynthetic process	4	10	14	31	0.00666	0.136355	TRINITY_DN12741_c0_g1,TRINITY_DN14532_c0_g1,TRINITY_DN3289_c0_g1,TRINITY_DN4485_c0_g1	TRINITY_DN10012_c0_g1,TRINITY_DN13634_c0_g1,TRINITY_DN18652_c0_g1,TRINITY_DN20643_c0_g1,TRINITY_DN26836_c0_g1,TRINITY_DN28586_c0_g1,TRINITY_DN37071_c0_g3,TRINITY_DN39319_c0_g1,TRINITY_DN41239_c1_g3,TRINITY_DN9724_c0_g1
BP	GO:0009150	purine ribonucleotide metabolic process	22	142	164	586	0.00683	0.139529	TRINITY_DN11387_c0_g1,TRINITY_DN11415_c0_g1,TRINITY_DN11424_c0_g1,TRINITY_DN11424_c0_g2,TRINITY_DN12595_c0_g1,TRINITY_DN15968_c0_g1,TRINITY_DN16711_c0_g1,TRINITY_DN17872_c0_g1,TRINITY_DN18403_c0_g1,TRINITY_DN20713_c0_g1,TRINITY_DN20717_c0_g2,TRINITY_DN3274_c0_g1,TRINITY_DN3797_c0_g2,TRINITY_DN4133_c0_g1,TRINITY_DN4632_c0_g1,TRINITY_DN480_c0_g2,TRINITY_DN4978_c0_g1,TRINITY_DN5076_c0_g1,TRINITY_DN5…	TRINITY_DN100563_c0_g1,TRINITY_DN101674_c0_g1,TRINITY_DN10425_c1_g1,TRINITY_DN104775_c0_g1,TRINITY_DN10625_c0_g1,TRINITY_DN10761_c0_g1,TRINITY_DN107701_c0_g1,TRINITY_DN107707_c0_g1,TRINITY_DN109180_c0_g1,TRINITY_DN113408_c0_g1,TRINITY_DN11577_c0_g1,TRINITY_DN116721_c0_g1,TRINITY_DN116881_c0_g1,TRINITY_DN117258_c0_g1,TRINITY_DN118773_c0_g1,TRINITY_DN120513_c0_g1,TRINITY_DN12336_c0_g1,TRINITY_DN126…
BP	GO:1901576	organic substance biosynthetic process	575	1492	2067	8446	0.0069	0.140243	TRINITY_DN10019_c0_g1,TRINITY_DN10022_c0_g1,TRINITY_DN10050_c1_g1,TRINITY_DN10053_c0_g1,TRINITY_DN10053_c0_g2,TRINITY_DN10130_c0_g1,TRINITY_DN101353_c0_g1,TRINITY_DN101651_c0_g1,TRINITY_DN10167_c0_g1,TRINITY_DN10179_c0_g1,TRINITY_DN10195_c0_g1,TRINITY_DN1026_c0_g1,TRINITY_DN10301_c0_g1,TRINITY_DN10320_c0_g1,TRINITY_DN103534_c0_g1,TRINITY_DN103968_c0_g1,TRINITY_DN10401_c0_g1,TRINITY_DN10422_c0_g1,…	TRINITY_DN10012_c0_g1,TRINITY_DN100343_c0_g1,TRINITY_DN100356_c0_g1,TRINITY_DN100388_c0_g1,TRINITY_DN100406_c0_g1,TRINITY_DN100544_c0_g1,TRINITY_DN100563_c0_g1,TRINITY_DN100601_c0_g1,TRINITY_DN100625_c0_g1,TRINITY_DN100700_c0_g1,TRINITY_DN100728_c0_g1,TRINITY_DN100779_c0_g1,TRINITY_DN100824_c0_g1,TRINITY_DN100860_c0_g1,TRINITY_DN100883_c0_g1,TRINITY_DN1008_c0_g1,TRINITY_DN100983_c0_g1,TRINITY_DN1…
MF	GO:0015252	proton channel activity	4	20	24	62	0.00691	0.140243	TRINITY_DN11387_c0_g1,TRINITY_DN4632_c0_g1,TRINITY_DN4978_c0_g1,TRINITY_DN61566_c0_g1	TRINITY_DN107701_c0_g1,TRINITY_DN113408_c0_g1,TRINITY_DN12336_c0_g1,TRINITY_DN15900_c0_g1,TRINITY_DN15900_c1_g1,TRINITY_DN15991_c0_g1,TRINITY_DN18355_c0_g1,TRINITY_DN19003_c0_g1,TRINITY_DN20021_c0_g1,TRINITY_DN20876_c0_g1,TRINITY_DN22235_c0_g1,TRINITY_DN29997_c0_g1,TRINITY_DN29997_c1_g1,TRINITY_DN33962_c0_g2,TRINITY_DN36551_c0_g1,TRINITY_DN41954_c0_g1,TRINITY_DN41954_c0_g2,TRINITY_DN53430_c0_g1,T…
MF	GO:0046933	proton-transporting ATP synthase activity, rotational mechanism	4	20	24	62	0.00691	0.140243	TRINITY_DN11387_c0_g1,TRINITY_DN4632_c0_g1,TRINITY_DN4978_c0_g1,TRINITY_DN61566_c0_g1	TRINITY_DN107701_c0_g1,TRINITY_DN113408_c0_g1,TRINITY_DN12336_c0_g1,TRINITY_DN15900_c0_g1,TRINITY_DN15900_c1_g1,TRINITY_DN15991_c0_g1,TRINITY_DN18355_c0_g1,TRINITY_DN19003_c0_g1,TRINITY_DN20021_c0_g1,TRINITY_DN20876_c0_g1,TRINITY_DN22235_c0_g1,TRINITY_DN29997_c0_g1,TRINITY_DN29997_c1_g1,TRINITY_DN33962_c0_g2,TRINITY_DN36551_c0_g1,TRINITY_DN41954_c0_g1,TRINITY_DN41954_c0_g2,TRINITY_DN53430_c0_g1,T…
MF	GO:0003729	mRNA binding	16	201	217	781	0.00697	0.14094	TRINITY_DN10320_c0_g1,TRINITY_DN12664_c0_g1,TRINITY_DN12675_c0_g1,TRINITY_DN13080_c0_g1,TRINITY_DN13151_c0_g1,TRINITY_DN17121_c0_g1,TRINITY_DN20489_c0_g1,TRINITY_DN23883_c0_g1,TRINITY_DN24297_c0_g2,TRINITY_DN27406_c0_g1,TRINITY_DN53699_c0_g1,TRINITY_DN55062_c0_g1,TRINITY_DN6901_c0_g1,TRINITY_DN6978_c0_g1,TRINITY_DN8617_c0_g1,TRINITY_DN9048_c0_g2	TRINITY_DN100388_c0_g1,TRINITY_DN100983_c0_g1,TRINITY_DN101175_c0_g1,TRINITY_DN10135_c0_g2,TRINITY_DN101503_c0_g1,TRINITY_DN101614_c0_g1,TRINITY_DN101686_c0_g1,TRINITY_DN102475_c0_g1,TRINITY_DN103539_c0_g1,TRINITY_DN104072_c0_g1,TRINITY_DN104118_c0_g1,TRINITY_DN104627_c0_g1,TRINITY_DN104776_c0_g1,TRINITY_DN104828_c0_g1,TRINITY_DN105558_c0_g1,TRINITY_DN105695_c0_g1,TRINITY_DN106134_c0_g1,TRINITY_D…
BP	GO:0006163	purine nucleotide metabolic process	23	145	168	602	0.00701	0.14094	TRINITY_DN11387_c0_g1,TRINITY_DN11415_c0_g1,TRINITY_DN11424_c0_g1,TRINITY_DN11424_c0_g2,TRINITY_DN12595_c0_g1,TRINITY_DN15968_c0_g1,TRINITY_DN16711_c0_g1,TRINITY_DN17872_c0_g1,TRINITY_DN18210_c0_g1,TRINITY_DN18403_c0_g1,TRINITY_DN20713_c0_g1,TRINITY_DN20717_c0_g2,TRINITY_DN3274_c0_g1,TRINITY_DN3797_c0_g2,TRINITY_DN4133_c0_g1,TRINITY_DN4632_c0_g1,TRINITY_DN480_c0_g2,TRINITY_DN4978_c0_g1,TRINITY_DN…	TRINITY_DN100563_c0_g1,TRINITY_DN101674_c0_g1,TRINITY_DN10425_c1_g1,TRINITY_DN104775_c0_g1,TRINITY_DN10625_c0_g1,TRINITY_DN10761_c0_g1,TRINITY_DN107701_c0_g1,TRINITY_DN107707_c0_g1,TRINITY_DN109180_c0_g1,TRINITY_DN113408_c0_g1,TRINITY_DN11577_c0_g1,TRINITY_DN116721_c0_g1,TRINITY_DN116881_c0_g1,TRINITY_DN117258_c0_g1,TRINITY_DN118773_c0_g1,TRINITY_DN120513_c0_g1,TRINITY_DN12336_c0_g1,TRINITY_DN126…
BP	GO:0009141	nucleoside triphosphate metabolic process	14	106	120	416	0.00701	0.14094	TRINITY_DN11387_c0_g1,TRINITY_DN11424_c0_g1,TRINITY_DN11424_c0_g2,TRINITY_DN15968_c0_g1,TRINITY_DN16711_c0_g1,TRINITY_DN16989_c0_g1,TRINITY_DN18210_c0_g1,TRINITY_DN18403_c0_g1,TRINITY_DN20713_c0_g1,TRINITY_DN4632_c0_g1,TRINITY_DN480_c0_g2,TRINITY_DN4978_c0_g1,TRINITY_DN61566_c0_g1,TRINITY_DN8791_c0_g1	TRINITY_DN100563_c0_g1,TRINITY_DN101674_c0_g1,TRINITY_DN104775_c0_g1,TRINITY_DN10625_c0_g1,TRINITY_DN10761_c0_g1,TRINITY_DN107701_c0_g1,TRINITY_DN107707_c0_g1,TRINITY_DN113408_c0_g1,TRINITY_DN11577_c0_g1,TRINITY_DN116721_c0_g1,TRINITY_DN116881_c0_g1,TRINITY_DN117258_c0_g1,TRINITY_DN118773_c0_g1,TRINITY_DN120513_c0_g1,TRINITY_DN12336_c0_g1,TRINITY_DN12676_c0_g1,TRINITY_DN13293_c0_g1,TRINITY_DN1364…
BP	GO:0097054	L-glutamate biosynthetic process	4	4	8	14	0.00705	0.14094	TRINITY_DN10978_c0_g2,TRINITY_DN18933_c0_g1,TRINITY_DN23377_c0_g1,TRINITY_DN27891_c0_g1	TRINITY_DN11038_c0_g1,TRINITY_DN22759_c0_g1,TRINITY_DN25366_c0_g1,TRINITY_DN612_c0_g1
BP	GO:0097501	stress response to metal ion	3	5	8	14	0.00705	0.14094	TRINITY_DN14214_c0_g1,TRINITY_DN14214_c0_g2,TRINITY_DN76028_c0_g1	TRINITY_DN44362_c0_g1,TRINITY_DN51551_c0_g1,TRINITY_DN5364_c0_g1,TRINITY_DN58432_c0_g1,TRINITY_DN6930_c0_g1
BP	GO:0099504	synaptic vesicle cycle	3	5	8	14	0.00705	0.14094	TRINITY_DN11700_c0_g1,TRINITY_DN19195_c0_g1,TRINITY_DN8035_c0_g1	TRINITY_DN11402_c0_g1,TRINITY_DN14199_c0_g1,TRINITY_DN47328_c0_g1,TRINITY_DN61845_c0_g1,TRINITY_DN948_c4_g1
BP	GO:1902289	negative regulation of defense response to oomycetes	0	8	8	14	0.00705	0.14094	-	TRINITY_DN10159_c0_g1,TRINITY_DN14962_c0_g1,TRINITY_DN1533_c0_g4,TRINITY_DN1533_c0_g6,TRINITY_DN1533_c1_g1,TRINITY_DN18012_c0_g1,TRINITY_DN19752_c0_g1,TRINITY_DN4183_c0_g1
BP	GO:0009753	response to jasmonic acid	56	53	109	374	0.00708	0.141025	TRINITY_DN101651_c0_g1,TRINITY_DN1026_c0_g1,TRINITY_DN10301_c0_g1,TRINITY_DN103968_c0_g1,TRINITY_DN10422_c0_g1,TRINITY_DN10781_c0_g1,TRINITY_DN10975_c0_g1,TRINITY_DN10975_c0_g2,TRINITY_DN10981_c0_g1,TRINITY_DN113401_c0_g1,TRINITY_DN11841_c0_g1,TRINITY_DN121173_c0_g1,TRINITY_DN12125_c0_g1,TRINITY_DN12303_c0_g1,TRINITY_DN13593_c0_g1,TRINITY_DN13924_c2_g1,TRINITY_DN1457_c0_g1,TRINITY_DN15998_c0_g1,T…	TRINITY_DN10129_c0_g2,TRINITY_DN107883_c0_g1,TRINITY_DN114100_c0_g1,TRINITY_DN11783_c0_g1,TRINITY_DN11975_c0_g1,TRINITY_DN1542_c0_g1,TRINITY_DN16146_c0_g1,TRINITY_DN16833_c0_g1,TRINITY_DN17905_c0_g2,TRINITY_DN18460_c0_g2,TRINITY_DN18728_c0_g1,TRINITY_DN19606_c0_g1,TRINITY_DN197_c0_g2,TRINITY_DN1_c1_g2,TRINITY_DN20525_c0_g2,TRINITY_DN21653_c0_g1,TRINITY_DN22153_c0_g1,TRINITY_DN2315_c1_g1,TRINITY_D…
MF	GO:0004970	ionotropic glutamate receptor activity	2	9	11	22	0.00716	0.141025	TRINITY_DN12484_c0_g1,TRINITY_DN24232_c0_g1	TRINITY_DN11989_c0_g2,TRINITY_DN12066_c0_g1,TRINITY_DN24232_c0_g2,TRINITY_DN3625_c0_g1,TRINITY_DN3750_c0_g1,TRINITY_DN3750_c1_g2,TRINITY_DN3750_c1_g3,TRINITY_DN5289_c0_g1,TRINITY_DN8183_c0_g3
MF	GO:0005230	extracellular ligand-gated ion channel activity	2	9	11	22	0.00716	0.141025	TRINITY_DN12484_c0_g1,TRINITY_DN24232_c0_g1	TRINITY_DN11989_c0_g2,TRINITY_DN12066_c0_g1,TRINITY_DN24232_c0_g2,TRINITY_DN3625_c0_g1,TRINITY_DN3750_c0_g1,TRINITY_DN3750_c1_g2,TRINITY_DN3750_c1_g3,TRINITY_DN5289_c0_g1,TRINITY_DN8183_c0_g3
MF	GO:0008066	glutamate receptor activity	2	9	11	22	0.00716	0.141025	TRINITY_DN12484_c0_g1,TRINITY_DN24232_c0_g1	TRINITY_DN11989_c0_g2,TRINITY_DN12066_c0_g1,TRINITY_DN24232_c0_g2,TRINITY_DN3625_c0_g1,TRINITY_DN3750_c0_g1,TRINITY_DN3750_c1_g2,TRINITY_DN3750_c1_g3,TRINITY_DN5289_c0_g1,TRINITY_DN8183_c0_g3
MF	GO:0022824	transmitter-gated ion channel activity	2	9	11	22	0.00716	0.141025	TRINITY_DN12484_c0_g1,TRINITY_DN24232_c0_g1	TRINITY_DN11989_c0_g2,TRINITY_DN12066_c0_g1,TRINITY_DN24232_c0_g2,TRINITY_DN3625_c0_g1,TRINITY_DN3750_c0_g1,TRINITY_DN3750_c1_g2,TRINITY_DN3750_c1_g3,TRINITY_DN5289_c0_g1,TRINITY_DN8183_c0_g3
MF	GO:0022835	transmitter-gated channel activity	2	9	11	22	0.00716	0.141025	TRINITY_DN12484_c0_g1,TRINITY_DN24232_c0_g1	TRINITY_DN11989_c0_g2,TRINITY_DN12066_c0_g1,TRINITY_DN24232_c0_g2,TRINITY_DN3625_c0_g1,TRINITY_DN3750_c0_g1,TRINITY_DN3750_c1_g2,TRINITY_DN3750_c1_g3,TRINITY_DN5289_c0_g1,TRINITY_DN8183_c0_g3
MF	GO:0030594	neurotransmitter receptor activity	2	9	11	22	0.00716	0.141025	TRINITY_DN12484_c0_g1,TRINITY_DN24232_c0_g1	TRINITY_DN11989_c0_g2,TRINITY_DN12066_c0_g1,TRINITY_DN24232_c0_g2,TRINITY_DN3625_c0_g1,TRINITY_DN3750_c0_g1,TRINITY_DN3750_c1_g2,TRINITY_DN3750_c1_g3,TRINITY_DN5289_c0_g1,TRINITY_DN8183_c0_g3
BP	GO:0055076	transition metal ion homeostasis	16	42	58	183	0.00722	0.141907	TRINITY_DN10918_c0_g1,TRINITY_DN13916_c0_g1,TRINITY_DN15097_c0_g1,TRINITY_DN1779_c0_g1,TRINITY_DN2054_c0_g1,TRINITY_DN2125_c0_g2,TRINITY_DN25048_c0_g1,TRINITY_DN31832_c0_g1,TRINITY_DN40055_c0_g1,TRINITY_DN4918_c0_g1,TRINITY_DN5756_c1_g1,TRINITY_DN605_c0_g1,TRINITY_DN6652_c0_g1,TRINITY_DN7381_c0_g1,TRINITY_DN76028_c0_g1,TRINITY_DN777_c0_g1	TRINITY_DN100009_c0_g1,TRINITY_DN10229_c0_g1,TRINITY_DN116465_c0_g1,TRINITY_DN123725_c0_g1,TRINITY_DN12785_c0_g1,TRINITY_DN12785_c0_g2,TRINITY_DN1318_c0_g1,TRINITY_DN17484_c0_g1,TRINITY_DN18688_c0_g2,TRINITY_DN1879_c0_g1,TRINITY_DN19654_c0_g2,TRINITY_DN20246_c0_g1,TRINITY_DN20796_c0_g1,TRINITY_DN21689_c0_g1,TRINITY_DN21708_c0_g1,TRINITY_DN2391_c0_g1,TRINITY_DN2422_c0_g1,TRINITY_DN3091_c0_g1,TRINI…
BP	GO:0033387	putrescine biosynthetic process from ornithine	0	6	6	9	0.00733	0.143767	-	TRINITY_DN108669_c0_g1,TRINITY_DN17261_c0_g1,TRINITY_DN18925_c0_g1,TRINITY_DN28234_c0_g2,TRINITY_DN48224_c0_g1,TRINITY_DN60850_c0_g1
BP	GO:0009637	response to blue light	31	12	43	129	0.00738	0.144444	TRINITY_DN10098_c0_g1,TRINITY_DN103505_c0_g1,TRINITY_DN10840_c0_g1,TRINITY_DN11160_c0_g1,TRINITY_DN116417_c0_g1,TRINITY_DN117136_c0_g1,TRINITY_DN12572_c0_g1,TRINITY_DN13151_c0_g1,TRINITY_DN13587_c0_g1,TRINITY_DN14201_c0_g1,TRINITY_DN15349_c0_g1,TRINITY_DN1709_c1_g1,TRINITY_DN19123_c0_g1,TRINITY_DN19183_c0_g1,TRINITY_DN20489_c0_g1,TRINITY_DN2414_c1_g1,TRINITY_DN3944_c0_g1,TRINITY_DN4017_c0_g1,TRIN…	TRINITY_DN11302_c0_g2,TRINITY_DN18956_c0_g2,TRINITY_DN25896_c0_g1,TRINITY_DN2767_c0_g1,TRINITY_DN3470_c0_g1,TRINITY_DN3878_c0_g1,TRINITY_DN40424_c0_g1,TRINITY_DN44226_c0_g1,TRINITY_DN5291_c0_g1,TRINITY_DN62815_c0_g1,TRINITY_DN83075_c0_g1,TRINITY_DN8849_c0_g1
BP	GO:0035384	thioester biosynthetic process	1	25	26	70	0.00742	0.14462	TRINITY_DN20717_c0_g2	TRINITY_DN10425_c1_g1,TRINITY_DN107707_c0_g1,TRINITY_DN13783_c0_g2,TRINITY_DN18738_c0_g1,TRINITY_DN19678_c0_g1,TRINITY_DN23047_c0_g2,TRINITY_DN25314_c0_g2,TRINITY_DN27667_c0_g1,TRINITY_DN30457_c0_g1,TRINITY_DN30457_c0_g3,TRINITY_DN35968_c0_g2,TRINITY_DN36512_c1_g1,TRINITY_DN38016_c0_g1,TRINITY_DN56475_c0_g1,TRINITY_DN56822_c0_g1,TRINITY_DN58476_c0_g1,TRINITY_DN58476_c1_g1,TRINITY_DN58476_c1_g2,TR…
BP	GO:0071616	acyl-CoA biosynthetic process	1	25	26	70	0.00742	0.14462	TRINITY_DN20717_c0_g2	TRINITY_DN10425_c1_g1,TRINITY_DN107707_c0_g1,TRINITY_DN13783_c0_g2,TRINITY_DN18738_c0_g1,TRINITY_DN19678_c0_g1,TRINITY_DN23047_c0_g2,TRINITY_DN25314_c0_g2,TRINITY_DN27667_c0_g1,TRINITY_DN30457_c0_g1,TRINITY_DN30457_c0_g3,TRINITY_DN35968_c0_g2,TRINITY_DN36512_c1_g1,TRINITY_DN38016_c0_g1,TRINITY_DN56475_c0_g1,TRINITY_DN56822_c0_g1,TRINITY_DN58476_c0_g1,TRINITY_DN58476_c1_g1,TRINITY_DN58476_c1_g2,TR…
BP	GO:0018298	protein-chromophore linkage	24	9	33	94	0.00756	0.147042	TRINITY_DN10618_c0_g1,TRINITY_DN10840_c0_g1,TRINITY_DN11954_c0_g1,TRINITY_DN121857_c0_g1,TRINITY_DN13151_c0_g1,TRINITY_DN14201_c0_g1,TRINITY_DN15654_c0_g1,TRINITY_DN18258_c0_g2,TRINITY_DN18838_c0_g4,TRINITY_DN19123_c0_g1,TRINITY_DN20489_c0_g1,TRINITY_DN4017_c0_g1,TRINITY_DN4017_c0_g2,TRINITY_DN4041_c0_g1,TRINITY_DN4441_c0_g1,TRINITY_DN51549_c0_g2,TRINITY_DN5194_c0_g1,TRINITY_DN5815_c0_g2,TRINITY_…	TRINITY_DN10142_c0_g1,TRINITY_DN11366_c0_g1,TRINITY_DN18141_c0_g1,TRINITY_DN19489_c0_g1,TRINITY_DN19489_c0_g2,TRINITY_DN20274_c0_g1,TRINITY_DN21156_c1_g1,TRINITY_DN25896_c0_g1,TRINITY_DN7987_c0_g1
CC	GO:0045261	proton-transporting ATP synthase complex, catalytic core F(1)	4	17	21	54	0.0078	0.151274	TRINITY_DN11387_c0_g1,TRINITY_DN4632_c0_g1,TRINITY_DN4978_c0_g1,TRINITY_DN61566_c0_g1	TRINITY_DN107701_c0_g1,TRINITY_DN113408_c0_g1,TRINITY_DN12336_c0_g1,TRINITY_DN15900_c0_g1,TRINITY_DN15900_c1_g1,TRINITY_DN15991_c0_g1,TRINITY_DN19003_c0_g1,TRINITY_DN20021_c0_g1,TRINITY_DN20876_c0_g1,TRINITY_DN22235_c0_g1,TRINITY_DN29997_c0_g1,TRINITY_DN29997_c1_g1,TRINITY_DN36551_c0_g1,TRINITY_DN41954_c0_g1,TRINITY_DN41954_c0_g2,TRINITY_DN53430_c0_g1,TRINITY_DN78286_c0_g1
MF	GO:0005310	dicarboxylic acid transmembrane transporter activity	6	9	15	34	0.00781	0.151274	TRINITY_DN11382_c0_g1,TRINITY_DN14581_c0_g1,TRINITY_DN16702_c0_g1,TRINITY_DN22826_c0_g1,TRINITY_DN3110_c0_g1,TRINITY_DN4315_c0_g1	TRINITY_DN11791_c0_g1,TRINITY_DN121060_c0_g1,TRINITY_DN15017_c0_g1,TRINITY_DN18646_c0_g1,TRINITY_DN24070_c0_g1,TRINITY_DN2469_c0_g1,TRINITY_DN56485_c0_g2,TRINITY_DN84236_c0_g1,TRINITY_DN9643_c0_g1
MF	GO:0071949	FAD binding	6	8	14	31	0.00785	0.151734	TRINITY_DN100945_c0_g1,TRINITY_DN17109_c0_g1,TRINITY_DN3438_c0_g1,TRINITY_DN4124_c0_g1,TRINITY_DN4124_c0_g2,TRINITY_DN8454_c0_g1	TRINITY_DN118052_c0_g1,TRINITY_DN16227_c0_g1,TRINITY_DN24573_c0_g1,TRINITY_DN44362_c0_g1,TRINITY_DN51551_c0_g1,TRINITY_DN55484_c0_g1,TRINITY_DN58432_c0_g1,TRINITY_DN880_c0_g2
MF	GO:0015930	glutamate synthase activity	4	4	8	14	0.0079	0.152385	TRINITY_DN10978_c0_g2,TRINITY_DN18933_c0_g1,TRINITY_DN23377_c0_g1,TRINITY_DN27891_c0_g1	TRINITY_DN11038_c0_g1,TRINITY_DN22759_c0_g1,TRINITY_DN25366_c0_g1,TRINITY_DN612_c0_g1
BP	GO:0071310	cellular response to organic substance	189	344	533	2070	0.00797	0.153418	TRINITY_DN10007_c0_g1,TRINITY_DN10019_c0_g1,TRINITY_DN100869_c0_g1,TRINITY_DN10157_c1_g2,TRINITY_DN10263_c0_g1,TRINITY_DN1026_c0_g1,TRINITY_DN10301_c0_g1,TRINITY_DN10318_c0_g1,TRINITY_DN103505_c0_g1,TRINITY_DN10401_c0_g1,TRINITY_DN10457_c0_g1,TRINITY_DN10462_c0_g1,TRINITY_DN10645_c0_g1,TRINITY_DN10681_c0_g1,TRINITY_DN10700_c0_g2,TRINITY_DN10888_c0_g1,TRINITY_DN10917_c0_g1,TRINITY_DN109277_c0_g1,T…	TRINITY_DN100544_c0_g1,TRINITY_DN100633_c0_g1,TRINITY_DN10159_c0_g1,TRINITY_DN10203_c0_g1,TRINITY_DN102348_c0_g1,TRINITY_DN10291_c2_g1,TRINITY_DN10291_c2_g3,TRINITY_DN1031_c0_g1,TRINITY_DN103536_c0_g1,TRINITY_DN103565_c0_g1,TRINITY_DN104341_c0_g1,TRINITY_DN104656_c0_g1,TRINITY_DN104775_c0_g1,TRINITY_DN105270_c0_g1,TRINITY_DN10591_c0_g1,TRINITY_DN1065_c0_g1,TRINITY_DN107689_c0_g1,TRINITY_DN107883_…
MF	GO:0008509	anion transmembrane transporter activity	45	78	123	422	0.00802	0.1535	TRINITY_DN10775_c0_g1,TRINITY_DN10895_c0_g1,TRINITY_DN11262_c0_g1,TRINITY_DN11284_c0_g1,TRINITY_DN11284_c0_g2,TRINITY_DN11382_c0_g1,TRINITY_DN11693_c0_g2,TRINITY_DN11704_c0_g2,TRINITY_DN13229_c0_g1,TRINITY_DN13916_c0_g1,TRINITY_DN14581_c0_g1,TRINITY_DN14920_c0_g1,TRINITY_DN1497_c0_g1,TRINITY_DN15716_c0_g1,TRINITY_DN1596_c0_g1,TRINITY_DN16551_c1_g1,TRINITY_DN16702_c0_g1,TRINITY_DN16716_c0_g1,TRINI…	TRINITY_DN104516_c0_g1,TRINITY_DN108718_c0_g1,TRINITY_DN11791_c0_g1,TRINITY_DN120647_c0_g1,TRINITY_DN121060_c0_g1,TRINITY_DN12689_c0_g1,TRINITY_DN14337_c4_g1,TRINITY_DN14481_c0_g1,TRINITY_DN14689_c0_g1,TRINITY_DN15017_c0_g1,TRINITY_DN16032_c0_g1,TRINITY_DN16643_c0_g1,TRINITY_DN16684_c0_g1,TRINITY_DN16898_c0_g1,TRINITY_DN17007_c0_g1,TRINITY_DN17400_c0_g1,TRINITY_DN178_c1_g1,TRINITY_DN18075_c0_g1,T…
MF	GO:0016831	carboxy-lyase activity	8	30	38	110	0.00802	0.1535	TRINITY_DN112015_c0_g1,TRINITY_DN1906_c0_g1,TRINITY_DN3381_c0_g1,TRINITY_DN6291_c0_g1,TRINITY_DN6528_c0_g1,TRINITY_DN7839_c0_g1,TRINITY_DN827_c0_g1,TRINITY_DN9634_c0_g1	TRINITY_DN10169_c0_g1,TRINITY_DN10425_c1_g1,TRINITY_DN108669_c0_g1,TRINITY_DN11604_c0_g3,TRINITY_DN119668_c0_g1,TRINITY_DN120882_c0_g1,TRINITY_DN12110_c0_g1,TRINITY_DN12356_c0_g1,TRINITY_DN15522_c1_g1,TRINITY_DN16835_c0_g1,TRINITY_DN17261_c0_g1,TRINITY_DN18738_c0_g1,TRINITY_DN18925_c0_g1,TRINITY_DN19039_c0_g1,TRINITY_DN20401_c0_g1,TRINITY_DN21351_c0_g1,TRINITY_DN21872_c0_g2,TRINITY_DN25863_c0_g1,…
MF	GO:0004586	ornithine decarboxylase activity	0	6	6	9	0.00804	0.1535	-	TRINITY_DN108669_c0_g1,TRINITY_DN17261_c0_g1,TRINITY_DN18925_c0_g1,TRINITY_DN28234_c0_g2,TRINITY_DN48224_c0_g1,TRINITY_DN60850_c0_g1
MF	GO:0043546	molybdopterin cofactor binding	0	6	6	9	0.00804	0.1535	-	TRINITY_DN114002_c0_g1,TRINITY_DN15023_c0_g1,TRINITY_DN15426_c0_g1,TRINITY_DN19162_c0_g1,TRINITY_DN5687_c0_g1,TRINITY_DN602_c0_g1
BP	GO:0009788	negative regulation of abscisic acid-activated signaling pathway	10	22	32	91	0.00821	0.15579	TRINITY_DN10007_c0_g1,TRINITY_DN10681_c0_g1,TRINITY_DN11050_c0_g1,TRINITY_DN113081_c0_g1,TRINITY_DN1420_c0_g1,TRINITY_DN4519_c0_g1,TRINITY_DN651_c0_g1,TRINITY_DN7489_c0_g1,TRINITY_DN7986_c0_g2,TRINITY_DN9506_c0_g1	TRINITY_DN10159_c0_g1,TRINITY_DN107883_c0_g1,TRINITY_DN11302_c0_g2,TRINITY_DN14962_c0_g1,TRINITY_DN1516_c0_g1,TRINITY_DN1533_c0_g4,TRINITY_DN1533_c0_g6,TRINITY_DN1533_c1_g1,TRINITY_DN18956_c0_g2,TRINITY_DN19752_c0_g1,TRINITY_DN21422_c0_g2,TRINITY_DN276_c2_g1,TRINITY_DN3214_c0_g2,TRINITY_DN36200_c0_g1,TRINITY_DN40424_c0_g1,TRINITY_DN4183_c0_g1,TRINITY_DN4554_c3_g1,TRINITY_DN53743_c0_g1,TRINITY_DN6…
BP	GO:1901420	negative regulation of response to alcohol	10	22	32	91	0.00821	0.15579	TRINITY_DN10007_c0_g1,TRINITY_DN10681_c0_g1,TRINITY_DN11050_c0_g1,TRINITY_DN113081_c0_g1,TRINITY_DN1420_c0_g1,TRINITY_DN4519_c0_g1,TRINITY_DN651_c0_g1,TRINITY_DN7489_c0_g1,TRINITY_DN7986_c0_g2,TRINITY_DN9506_c0_g1	TRINITY_DN10159_c0_g1,TRINITY_DN107883_c0_g1,TRINITY_DN11302_c0_g2,TRINITY_DN14962_c0_g1,TRINITY_DN1516_c0_g1,TRINITY_DN1533_c0_g4,TRINITY_DN1533_c0_g6,TRINITY_DN1533_c1_g1,TRINITY_DN18956_c0_g2,TRINITY_DN19752_c0_g1,TRINITY_DN21422_c0_g2,TRINITY_DN276_c2_g1,TRINITY_DN3214_c0_g2,TRINITY_DN36200_c0_g1,TRINITY_DN40424_c0_g1,TRINITY_DN4183_c0_g1,TRINITY_DN4554_c3_g1,TRINITY_DN53743_c0_g1,TRINITY_DN6…
BP	GO:1905958	negative regulation of cellular response to alcohol	10	22	32	91	0.00821	0.15579	TRINITY_DN10007_c0_g1,TRINITY_DN10681_c0_g1,TRINITY_DN11050_c0_g1,TRINITY_DN113081_c0_g1,TRINITY_DN1420_c0_g1,TRINITY_DN4519_c0_g1,TRINITY_DN651_c0_g1,TRINITY_DN7489_c0_g1,TRINITY_DN7986_c0_g2,TRINITY_DN9506_c0_g1	TRINITY_DN10159_c0_g1,TRINITY_DN107883_c0_g1,TRINITY_DN11302_c0_g2,TRINITY_DN14962_c0_g1,TRINITY_DN1516_c0_g1,TRINITY_DN1533_c0_g4,TRINITY_DN1533_c0_g6,TRINITY_DN1533_c1_g1,TRINITY_DN18956_c0_g2,TRINITY_DN19752_c0_g1,TRINITY_DN21422_c0_g2,TRINITY_DN276_c2_g1,TRINITY_DN3214_c0_g2,TRINITY_DN36200_c0_g1,TRINITY_DN40424_c0_g1,TRINITY_DN4183_c0_g1,TRINITY_DN4554_c3_g1,TRINITY_DN53743_c0_g1,TRINITY_DN6…
BP	GO:0046654	tetrahydrofolate biosynthetic process	4	5	9	17	0.00825	0.156104	TRINITY_DN16733_c0_g2,TRINITY_DN273_c0_g1,TRINITY_DN7802_c0_g1,TRINITY_DN9844_c0_g1	TRINITY_DN273_c0_g2,TRINITY_DN29813_c0_g2,TRINITY_DN4524_c0_g1,TRINITY_DN64822_c0_g1,TRINITY_DN8189_c0_g1
BP	GO:0098771	inorganic ion homeostasis	27	87	114	395	0.00826	0.156104	TRINITY_DN10301_c0_g1,TRINITY_DN10918_c0_g1,TRINITY_DN109967_c0_g1,TRINITY_DN11262_c0_g1,TRINITY_DN11382_c0_g1,TRINITY_DN12200_c0_g2,TRINITY_DN13916_c0_g1,TRINITY_DN15097_c0_g1,TRINITY_DN15850_c0_g1,TRINITY_DN1779_c0_g1,TRINITY_DN2054_c0_g1,TRINITY_DN2125_c0_g2,TRINITY_DN24472_c0_g1,TRINITY_DN24472_c0_g2,TRINITY_DN25048_c0_g1,TRINITY_DN31832_c0_g1,TRINITY_DN40055_c0_g1,TRINITY_DN4034_c0_g1,TRINIT…	TRINITY_DN100009_c0_g1,TRINITY_DN100489_c0_g1,TRINITY_DN101214_c0_g1,TRINITY_DN10229_c0_g1,TRINITY_DN103891_c0_g1,TRINITY_DN107924_c0_g1,TRINITY_DN116465_c0_g1,TRINITY_DN117742_c0_g1,TRINITY_DN123064_c0_g1,TRINITY_DN123725_c0_g1,TRINITY_DN12785_c0_g1,TRINITY_DN12785_c0_g2,TRINITY_DN1318_c0_g1,TRINITY_DN13225_c0_g1,TRINITY_DN14366_c0_g2,TRINITY_DN15272_c0_g1,TRINITY_DN16785_c0_g2,TRINITY_DN17007_c…
MF	GO:0042626	ATPase-coupled transmembrane transporter activity	32	98	130	449	0.0083	0.156543	TRINITY_DN10248_c0_g3,TRINITY_DN10248_c0_g4,TRINITY_DN11059_c0_g1,TRINITY_DN112480_c0_g1,TRINITY_DN11387_c0_g1,TRINITY_DN11997_c0_g1,TRINITY_DN12994_c0_g1,TRINITY_DN13837_c0_g1,TRINITY_DN14577_c0_g1,TRINITY_DN14888_c0_g1,TRINITY_DN1546_c2_g1,TRINITY_DN1578_c0_g1,TRINITY_DN15974_c0_g1,TRINITY_DN16740_c0_g1,TRINITY_DN20894_c0_g1,TRINITY_DN2248_c1_g1,TRINITY_DN22607_c0_g1,TRINITY_DN2456_c0_g1,TRINIT…	TRINITY_DN101214_c0_g1,TRINITY_DN10368_c0_g1,TRINITY_DN104909_c0_g1,TRINITY_DN107701_c0_g1,TRINITY_DN11100_c0_g1,TRINITY_DN113408_c0_g1,TRINITY_DN11340_c0_g1,TRINITY_DN11499_c0_g1,TRINITY_DN117742_c0_g1,TRINITY_DN12000_c0_g2,TRINITY_DN121452_c0_g1,TRINITY_DN12336_c0_g1,TRINITY_DN12423_c0_g1,TRINITY_DN13368_c0_g1,TRINITY_DN13663_c0_g1,TRINITY_DN13806_c0_g1,TRINITY_DN14142_c0_g1,TRINITY_DN14856_c0_…
BP	GO:0031669	cellular response to nutrient levels	34	69	103	353	0.00833	0.156792	TRINITY_DN10019_c0_g1,TRINITY_DN10301_c0_g1,TRINITY_DN110770_c0_g1,TRINITY_DN12200_c0_g2,TRINITY_DN130_c0_g2,TRINITY_DN13916_c0_g1,TRINITY_DN18143_c0_g1,TRINITY_DN1906_c0_g1,TRINITY_DN23656_c0_g1,TRINITY_DN32951_c0_g1,TRINITY_DN35814_c0_g2,TRINITY_DN3666_c0_g1,TRINITY_DN4098_c0_g1,TRINITY_DN506_c0_g3,TRINITY_DN5410_c0_g1,TRINITY_DN5655_c0_g1,TRINITY_DN5709_c0_g1,TRINITY_DN5727_c1_g1,TRINITY_DN577…	TRINITY_DN101081_c0_g1,TRINITY_DN10169_c0_g1,TRINITY_DN1038_c0_g1,TRINITY_DN104775_c0_g1,TRINITY_DN10802_c0_g1,TRINITY_DN110319_c0_g1,TRINITY_DN11148_c0_g1,TRINITY_DN112613_c0_g1,TRINITY_DN11383_c0_g1,TRINITY_DN11395_c0_g1,TRINITY_DN11604_c0_g3,TRINITY_DN120800_c0_g1,TRINITY_DN120925_c0_g1,TRINITY_DN12259_c0_g1,TRINITY_DN123064_c0_g1,TRINITY_DN12356_c0_g1,TRINITY_DN13225_c0_g1,TRINITY_DN13640_c0_…
CC	GO:0010319	stromule	10	10	20	51	0.00836	0.15704	TRINITY_DN11080_c1_g1,TRINITY_DN17905_c0_g1,TRINITY_DN2039_c0_g1,TRINITY_DN23730_c0_g1,TRINITY_DN3323_c0_g1,TRINITY_DN357_c0_g1,TRINITY_DN3802_c0_g1,TRINITY_DN4632_c0_g1,TRINITY_DN61566_c0_g1,TRINITY_DN9659_c0_g1	TRINITY_DN12997_c0_g1,TRINITY_DN14212_c0_g1,TRINITY_DN17905_c0_g2,TRINITY_DN19016_c0_g1,TRINITY_DN22155_c0_g1,TRINITY_DN23512_c0_g1,TRINITY_DN26884_c0_g1,TRINITY_DN35345_c0_g1,TRINITY_DN41126_c0_g1,TRINITY_DN41142_c0_g6
BP	GO:0046031	ADP metabolic process	8	51	59	188	0.00851	0.159537	TRINITY_DN11424_c0_g1,TRINITY_DN11424_c0_g2,TRINITY_DN15968_c0_g1,TRINITY_DN16711_c0_g1,TRINITY_DN18403_c0_g1,TRINITY_DN20713_c0_g1,TRINITY_DN480_c0_g2,TRINITY_DN8791_c0_g1	TRINITY_DN100563_c0_g1,TRINITY_DN104775_c0_g1,TRINITY_DN10761_c0_g1,TRINITY_DN107707_c0_g1,TRINITY_DN11577_c0_g1,TRINITY_DN116721_c0_g1,TRINITY_DN116881_c0_g1,TRINITY_DN118773_c0_g1,TRINITY_DN13293_c0_g1,TRINITY_DN13640_c0_g1,TRINITY_DN13783_c0_g2,TRINITY_DN15111_c0_g1,TRINITY_DN1637_c0_g1,TRINITY_DN16476_c0_g1,TRINITY_DN17334_c1_g1,TRINITY_DN18919_c0_g1,TRINITY_DN21146_c0_g2,TRINITY_DN21146_c1_g…
MF	GO:0046915	transition metal ion transmembrane transporter activity	5	25	30	83	0.00862	0.161139	TRINITY_DN10918_c0_g1,TRINITY_DN122658_c0_g1,TRINITY_DN5721_c0_g2,TRINITY_DN5756_c1_g1,TRINITY_DN605_c0_g1	TRINITY_DN116465_c0_g1,TRINITY_DN12785_c0_g1,TRINITY_DN12785_c0_g2,TRINITY_DN17484_c0_g1,TRINITY_DN18660_c0_g2,TRINITY_DN19654_c0_g2,TRINITY_DN20246_c0_g1,TRINITY_DN21708_c0_g1,TRINITY_DN3091_c0_g1,TRINITY_DN401_c0_g2,TRINITY_DN4213_c0_g1,TRINITY_DN4377_c0_g1,TRINITY_DN4377_c0_g2,TRINITY_DN4897_c0_g1,TRINITY_DN5432_c0_g1,TRINITY_DN58398_c0_g2,TRINITY_DN642_c0_g1,TRINITY_DN6930_c0_g1,TRINITY_DN752…
MF	GO:0005261	cation channel activity	16	43	59	185	0.00863	0.161139	TRINITY_DN11387_c0_g1,TRINITY_DN12484_c0_g1,TRINITY_DN20195_c0_g1,TRINITY_DN24232_c0_g1,TRINITY_DN24391_c0_g1,TRINITY_DN25890_c0_g1,TRINITY_DN33782_c0_g1,TRINITY_DN42_c1_g2,TRINITY_DN4632_c0_g1,TRINITY_DN4978_c0_g1,TRINITY_DN56287_c0_g2,TRINITY_DN61566_c0_g1,TRINITY_DN7127_c0_g3,TRINITY_DN7986_c0_g2,TRINITY_DN8237_c0_g1,TRINITY_DN8771_c1_g1	TRINITY_DN107701_c0_g1,TRINITY_DN113408_c0_g1,TRINITY_DN1169_c0_g1,TRINITY_DN1169_c0_g2,TRINITY_DN11989_c0_g2,TRINITY_DN12066_c0_g1,TRINITY_DN12336_c0_g1,TRINITY_DN15900_c0_g1,TRINITY_DN15900_c1_g1,TRINITY_DN15991_c0_g1,TRINITY_DN18355_c0_g1,TRINITY_DN19003_c0_g1,TRINITY_DN19936_c1_g1,TRINITY_DN20021_c0_g1,TRINITY_DN20569_c1_g1,TRINITY_DN20876_c0_g1,TRINITY_DN22235_c0_g1,TRINITY_DN22777_c0_g1,TRI…
MF	GO:0015171	amino acid transmembrane transporter activity	10	27	37	107	0.00865	0.161157	TRINITY_DN11284_c0_g1,TRINITY_DN11284_c0_g2,TRINITY_DN11693_c0_g2,TRINITY_DN1596_c0_g1,TRINITY_DN16974_c0_g1,TRINITY_DN2112_c0_g1,TRINITY_DN28447_c0_g1,TRINITY_DN3110_c0_g1,TRINITY_DN4031_c0_g1,TRINITY_DN97027_c0_g1	TRINITY_DN104516_c0_g1,TRINITY_DN11791_c0_g1,TRINITY_DN16032_c0_g1,TRINITY_DN17400_c0_g1,TRINITY_DN18201_c0_g1,TRINITY_DN18296_c0_g1,TRINITY_DN21419_c0_g1,TRINITY_DN23436_c0_g1,TRINITY_DN24110_c0_g1,TRINITY_DN24603_c0_g1,TRINITY_DN26003_c0_g1,TRINITY_DN28419_c0_g1,TRINITY_DN32415_c0_g1,TRINITY_DN34012_c0_g1,TRINITY_DN37495_c0_g1,TRINITY_DN37542_c0_g1,TRINITY_DN4129_c0_g1,TRINITY_DN5153_c1_g3,TRIN…
BP	GO:0042762	regulation of sulfur metabolic process	10	6	16	38	0.0087	0.161157	TRINITY_DN10603_c0_g2,TRINITY_DN120433_c0_g1,TRINITY_DN1299_c2_g1,TRINITY_DN1299_c2_g2,TRINITY_DN3666_c0_g1,TRINITY_DN506_c0_g3,TRINITY_DN6967_c0_g1,TRINITY_DN817_c1_g2,TRINITY_DN8700_c0_g1,TRINITY_DN8700_c1_g1	TRINITY_DN11293_c0_g1,TRINITY_DN4164_c0_g2,TRINITY_DN44362_c0_g1,TRINITY_DN51551_c0_g1,TRINITY_DN58432_c0_g1,TRINITY_DN7394_c1_g1
BP	GO:0051238	sequestering of metal ion	2	14	16	38	0.0087	0.161157	TRINITY_DN31832_c0_g1,TRINITY_DN40055_c0_g1	TRINITY_DN116465_c0_g1,TRINITY_DN12785_c0_g1,TRINITY_DN12785_c0_g2,TRINITY_DN17484_c0_g1,TRINITY_DN18205_c0_g1,TRINITY_DN19654_c0_g2,TRINITY_DN20246_c0_g1,TRINITY_DN3091_c0_g1,TRINITY_DN44257_c0_g1,TRINITY_DN44412_c0_g1,TRINITY_DN642_c0_g1,TRINITY_DN7741_c0_g2,TRINITY_DN84874_c0_g1,TRINITY_DN953_c0_g1
BP	GO:0070301	cellular response to hydrogen peroxide	3	13	16	38	0.0087	0.161157	TRINITY_DN11050_c0_g1,TRINITY_DN1858_c0_g1,TRINITY_DN7489_c0_g1	TRINITY_DN104775_c0_g1,TRINITY_DN113263_c0_g1,TRINITY_DN11383_c0_g1,TRINITY_DN11712_c0_g1,TRINITY_DN13640_c0_g1,TRINITY_DN20031_c0_g1,TRINITY_DN2194_c0_g1,TRINITY_DN24987_c0_g1,TRINITY_DN27547_c0_g1,TRINITY_DN27686_c0_g1,TRINITY_DN63707_c0_g2,TRINITY_DN63707_c1_g1,TRINITY_DN90657_c0_g1
BP	GO:0072524	pyridine-containing compound metabolic process	14	72	86	289	0.00876	0.161947	TRINITY_DN101097_c0_g1,TRINITY_DN11424_c0_g1,TRINITY_DN11424_c0_g2,TRINITY_DN1442_c1_g1,TRINITY_DN15968_c0_g1,TRINITY_DN16711_c0_g1,TRINITY_DN17982_c0_g1,TRINITY_DN18403_c0_g1,TRINITY_DN19959_c0_g1,TRINITY_DN20713_c0_g1,TRINITY_DN4703_c1_g1,TRINITY_DN480_c0_g2,TRINITY_DN6004_c1_g1,TRINITY_DN8791_c0_g1	TRINITY_DN100563_c0_g1,TRINITY_DN103933_c0_g1,TRINITY_DN10761_c0_g1,TRINITY_DN107707_c0_g1,TRINITY_DN11577_c0_g1,TRINITY_DN116721_c0_g1,TRINITY_DN116881_c0_g1,TRINITY_DN118773_c0_g1,TRINITY_DN121663_c0_g1,TRINITY_DN13293_c0_g1,TRINITY_DN13783_c0_g2,TRINITY_DN15111_c0_g1,TRINITY_DN15729_c0_g2,TRINITY_DN1637_c0_g1,TRINITY_DN16476_c0_g1,TRINITY_DN17334_c1_g1,TRINITY_DN17650_c0_g1,TRINITY_DN18320_c0_…
BP	GO:0046034	ATP metabolic process	12	95	107	369	0.00885	0.163288	TRINITY_DN11387_c0_g1,TRINITY_DN11424_c0_g1,TRINITY_DN11424_c0_g2,TRINITY_DN15968_c0_g1,TRINITY_DN16711_c0_g1,TRINITY_DN18403_c0_g1,TRINITY_DN20713_c0_g1,TRINITY_DN4632_c0_g1,TRINITY_DN480_c0_g2,TRINITY_DN4978_c0_g1,TRINITY_DN61566_c0_g1,TRINITY_DN8791_c0_g1	TRINITY_DN100563_c0_g1,TRINITY_DN101674_c0_g1,TRINITY_DN104775_c0_g1,TRINITY_DN10761_c0_g1,TRINITY_DN107701_c0_g1,TRINITY_DN107707_c0_g1,TRINITY_DN113408_c0_g1,TRINITY_DN11577_c0_g1,TRINITY_DN116721_c0_g1,TRINITY_DN116881_c0_g1,TRINITY_DN117258_c0_g1,TRINITY_DN118773_c0_g1,TRINITY_DN120513_c0_g1,TRINITY_DN12336_c0_g1,TRINITY_DN12676_c0_g1,TRINITY_DN13293_c0_g1,TRINITY_DN13640_c0_g1,TRINITY_DN1378…
CC	GO:0009547	plastid ribosome	1	12	13	29	0.0089	0.163789	TRINITY_DN11090_c1_g1	TRINITY_DN108639_c0_g1,TRINITY_DN116340_c0_g1,TRINITY_DN120367_c0_g1,TRINITY_DN120761_c0_g1,TRINITY_DN13308_c0_g1,TRINITY_DN13308_c1_g2,TRINITY_DN17176_c0_g1,TRINITY_DN17690_c0_g1,TRINITY_DN19292_c0_g1,TRINITY_DN19292_c0_g2,TRINITY_DN19292_c0_g3,TRINITY_DN26530_c0_g1
BP	GO:0006030	chitin metabolic process	7	3	10	20	0.009	0.163789	TRINITY_DN13114_c0_g1,TRINITY_DN30884_c1_g1,TRINITY_DN32307_c0_g1,TRINITY_DN3246_c0_g1,TRINITY_DN3447_c0_g1,TRINITY_DN3447_c0_g2,TRINITY_DN5788_c0_g1	TRINITY_DN19784_c0_g1,TRINITY_DN5788_c0_g2,TRINITY_DN6495_c0_g1
BP	GO:0006032	chitin catabolic process	7	3	10	20	0.009	0.163789	TRINITY_DN13114_c0_g1,TRINITY_DN30884_c1_g1,TRINITY_DN32307_c0_g1,TRINITY_DN3246_c0_g1,TRINITY_DN3447_c0_g1,TRINITY_DN3447_c0_g2,TRINITY_DN5788_c0_g1	TRINITY_DN19784_c0_g1,TRINITY_DN5788_c0_g2,TRINITY_DN6495_c0_g1
BP	GO:0009299	mRNA transcription	3	7	10	20	0.009	0.163789	TRINITY_DN19183_c0_g1,TRINITY_DN4542_c2_g1,TRINITY_DN85157_c0_g1	TRINITY_DN112613_c0_g1,TRINITY_DN16494_c0_g1,TRINITY_DN17865_c0_g1,TRINITY_DN2231_c0_g2,TRINITY_DN39225_c0_g1,TRINITY_DN7475_c0_g2,TRINITY_DN8170_c0_g1
BP	GO:0015851	nucleobase transport	1	9	10	20	0.009	0.163789	TRINITY_DN630_c0_g1	TRINITY_DN11072_c0_g1,TRINITY_DN12100_c0_g1,TRINITY_DN15394_c0_g1,TRINITY_DN20863_c0_g1,TRINITY_DN2304_c0_g1,TRINITY_DN2614_c0_g1,TRINITY_DN29253_c0_g1,TRINITY_DN69365_c1_g1,TRINITY_DN937_c0_g1
BP	GO:0046348	amino sugar catabolic process	7	3	10	20	0.009	0.163789	TRINITY_DN13114_c0_g1,TRINITY_DN30884_c1_g1,TRINITY_DN32307_c0_g1,TRINITY_DN3246_c0_g1,TRINITY_DN3447_c0_g1,TRINITY_DN3447_c0_g2,TRINITY_DN5788_c0_g1	TRINITY_DN19784_c0_g1,TRINITY_DN5788_c0_g2,TRINITY_DN6495_c0_g1
BP	GO:1901072	glucosamine-containing compound catabolic process	7	3	10	20	0.009	0.163789	TRINITY_DN13114_c0_g1,TRINITY_DN30884_c1_g1,TRINITY_DN32307_c0_g1,TRINITY_DN3246_c0_g1,TRINITY_DN3447_c0_g1,TRINITY_DN3447_c0_g2,TRINITY_DN5788_c0_g1	TRINITY_DN19784_c0_g1,TRINITY_DN5788_c0_g2,TRINITY_DN6495_c0_g1
BP	GO:0001763	morphogenesis of a branching structure	7	19	26	71	0.00913	0.16551	TRINITY_DN20476_c0_g1,TRINITY_DN2335_c0_g1,TRINITY_DN25370_c0_g1,TRINITY_DN5727_c1_g1,TRINITY_DN6607_c0_g1,TRINITY_DN6607_c0_g2,TRINITY_DN7211_c0_g1	TRINITY_DN102475_c0_g1,TRINITY_DN112613_c0_g1,TRINITY_DN11689_c0_g1,TRINITY_DN120622_c0_g1,TRINITY_DN12337_c0_g1,TRINITY_DN12337_c0_g2,TRINITY_DN16150_c0_g1,TRINITY_DN19756_c0_g2,TRINITY_DN2775_c0_g1,TRINITY_DN5413_c0_g1,TRINITY_DN5682_c0_g1,TRINITY_DN6087_c0_g1,TRINITY_DN6345_c0_g1,TRINITY_DN6989_c0_g1,TRINITY_DN8435_c1_g1,TRINITY_DN8797_c0_g1,TRINITY_DN8797_c0_g2,TRINITY_DN96124_c0_g1,TRINITY_D…
BP	GO:0010109	regulation of photosynthesis	9	17	26	71	0.00913	0.16551	TRINITY_DN10681_c0_g1,TRINITY_DN11988_c0_g1,TRINITY_DN1570_c0_g2,TRINITY_DN21681_c0_g1,TRINITY_DN2651_c0_g1,TRINITY_DN3201_c0_g1,TRINITY_DN4703_c1_g1,TRINITY_DN651_c0_g1,TRINITY_DN8596_c0_g1	TRINITY_DN100955_c0_g1,TRINITY_DN11250_c0_g1,TRINITY_DN12219_c0_g1,TRINITY_DN13368_c0_g1,TRINITY_DN13381_c0_g3,TRINITY_DN17802_c0_g1,TRINITY_DN22983_c0_g1,TRINITY_DN25349_c0_g3,TRINITY_DN27039_c0_g1,TRINITY_DN33585_c0_g1,TRINITY_DN37071_c0_g1,TRINITY_DN45525_c0_g1,TRINITY_DN51659_c0_g2,TRINITY_DN51659_c1_g1,TRINITY_DN8254_c0_g1,TRINITY_DN9726_c0_g1,TRINITY_DN9726_c0_g2
BP	GO:0006096	glycolytic process	8	50	58	185	0.00922	0.166053	TRINITY_DN11424_c0_g1,TRINITY_DN11424_c0_g2,TRINITY_DN15968_c0_g1,TRINITY_DN16711_c0_g1,TRINITY_DN18403_c0_g1,TRINITY_DN20713_c0_g1,TRINITY_DN480_c0_g2,TRINITY_DN8791_c0_g1	TRINITY_DN100563_c0_g1,TRINITY_DN104775_c0_g1,TRINITY_DN10761_c0_g1,TRINITY_DN107707_c0_g1,TRINITY_DN11577_c0_g1,TRINITY_DN116721_c0_g1,TRINITY_DN116881_c0_g1,TRINITY_DN118773_c0_g1,TRINITY_DN13293_c0_g1,TRINITY_DN13640_c0_g1,TRINITY_DN13783_c0_g2,TRINITY_DN15111_c0_g1,TRINITY_DN1637_c0_g1,TRINITY_DN16476_c0_g1,TRINITY_DN17334_c1_g1,TRINITY_DN18919_c0_g1,TRINITY_DN21146_c0_g2,TRINITY_DN21146_c1_g…
BP	GO:0006757	ATP generation from ADP	8	50	58	185	0.00922	0.166053	TRINITY_DN11424_c0_g1,TRINITY_DN11424_c0_g2,TRINITY_DN15968_c0_g1,TRINITY_DN16711_c0_g1,TRINITY_DN18403_c0_g1,TRINITY_DN20713_c0_g1,TRINITY_DN480_c0_g2,TRINITY_DN8791_c0_g1	TRINITY_DN100563_c0_g1,TRINITY_DN104775_c0_g1,TRINITY_DN10761_c0_g1,TRINITY_DN107707_c0_g1,TRINITY_DN11577_c0_g1,TRINITY_DN116721_c0_g1,TRINITY_DN116881_c0_g1,TRINITY_DN118773_c0_g1,TRINITY_DN13293_c0_g1,TRINITY_DN13640_c0_g1,TRINITY_DN13783_c0_g2,TRINITY_DN15111_c0_g1,TRINITY_DN1637_c0_g1,TRINITY_DN16476_c0_g1,TRINITY_DN17334_c1_g1,TRINITY_DN18919_c0_g1,TRINITY_DN21146_c0_g2,TRINITY_DN21146_c1_g…
BP	GO:0043648	dicarboxylic acid metabolic process	14	44	58	185	0.00922	0.166053	TRINITY_DN10563_c0_g1,TRINITY_DN10978_c0_g2,TRINITY_DN14664_c0_g1,TRINITY_DN16733_c0_g2,TRINITY_DN18933_c0_g1,TRINITY_DN23377_c0_g1,TRINITY_DN27891_c0_g1,TRINITY_DN3442_c0_g1,TRINITY_DN6066_c0_g1,TRINITY_DN6066_c0_g2,TRINITY_DN6528_c0_g1,TRINITY_DN7802_c0_g1,TRINITY_DN78066_c0_g2,TRINITY_DN9844_c0_g1	TRINITY_DN103933_c0_g1,TRINITY_DN108003_c0_g1,TRINITY_DN11038_c0_g1,TRINITY_DN11205_c0_g2,TRINITY_DN13352_c0_g1,TRINITY_DN16227_c0_g1,TRINITY_DN17650_c0_g1,TRINITY_DN19039_c0_g1,TRINITY_DN21263_c0_g1,TRINITY_DN22759_c0_g1,TRINITY_DN22964_c0_g1,TRINITY_DN23280_c0_g1,TRINITY_DN25167_c0_g1,TRINITY_DN25366_c0_g1,TRINITY_DN30338_c0_g1,TRINITY_DN30952_c0_g2,TRINITY_DN31249_c0_g2,TRINITY_DN31337_c0_g1,T…
MF	GO:0005548	phospholipid transporter activity	4	19	23	60	0.00925	0.166053	TRINITY_DN12584_c0_g1,TRINITY_DN241_c1_g2,TRINITY_DN25953_c0_g1,TRINITY_DN8963_c0_g2	TRINITY_DN14156_c0_g1,TRINITY_DN1522_c0_g1,TRINITY_DN16388_c1_g1,TRINITY_DN16388_c1_g2,TRINITY_DN25487_c0_g1,TRINITY_DN25511_c0_g1,TRINITY_DN25511_c0_g2,TRINITY_DN293_c0_g1,TRINITY_DN31509_c0_g1,TRINITY_DN31666_c0_g2,TRINITY_DN34472_c0_g1,TRINITY_DN36360_c0_g1,TRINITY_DN37150_c0_g1,TRINITY_DN39446_c0_g1,TRINITY_DN4036_c2_g1,TRINITY_DN5902_c0_g1,TRINITY_DN762_c0_g1,TRINITY_DN82197_c0_g1,TRINITY_DN…
BP	GO:0055082	cellular chemical homeostasis	28	71	99	339	0.00929	0.166053	TRINITY_DN10019_c0_g1,TRINITY_DN11262_c0_g1,TRINITY_DN11382_c0_g1,TRINITY_DN12200_c0_g2,TRINITY_DN1339_c0_g1,TRINITY_DN1339_c0_g2,TRINITY_DN13916_c0_g1,TRINITY_DN14920_c0_g1,TRINITY_DN15850_c0_g1,TRINITY_DN16711_c0_g1,TRINITY_DN18403_c0_g1,TRINITY_DN2054_c0_g1,TRINITY_DN21012_c0_g1,TRINITY_DN22940_c0_g1,TRINITY_DN24472_c0_g1,TRINITY_DN24472_c0_g2,TRINITY_DN25048_c0_g1,TRINITY_DN30598_c0_g1,TRINIT…	TRINITY_DN100009_c0_g1,TRINITY_DN100489_c0_g1,TRINITY_DN101214_c0_g1,TRINITY_DN103891_c0_g1,TRINITY_DN104775_c0_g1,TRINITY_DN10761_c0_g1,TRINITY_DN107924_c0_g1,TRINITY_DN112613_c0_g1,TRINITY_DN116465_c0_g1,TRINITY_DN117742_c0_g1,TRINITY_DN12066_c0_g1,TRINITY_DN121430_c0_g1,TRINITY_DN123064_c0_g1,TRINITY_DN123725_c0_g1,TRINITY_DN12785_c0_g1,TRINITY_DN12785_c0_g2,TRINITY_DN1318_c0_g1,TRINITY_DN1364…
MF	GO:0004332	fructose-bisphosphate aldolase activity	3	6	9	17	0.00931	0.166053	TRINITY_DN11424_c0_g1,TRINITY_DN11424_c0_g2,TRINITY_DN15968_c0_g1	TRINITY_DN100563_c0_g1,TRINITY_DN116881_c0_g1,TRINITY_DN16476_c0_g1,TRINITY_DN22450_c0_g1,TRINITY_DN33689_c0_g1,TRINITY_DN4588_c0_g2
MF	GO:0016151	nickel cation binding	4	5	9	17	0.00931	0.166053	TRINITY_DN13826_c0_g1,TRINITY_DN3201_c0_g1,TRINITY_DN5558_c0_g1,TRINITY_DN6063_c4_g1	TRINITY_DN11250_c0_g1,TRINITY_DN34867_c0_g2,TRINITY_DN51659_c0_g2,TRINITY_DN51659_c1_g1,TRINITY_DN7911_c0_g1
MF	GO:0016713	oxidoreductase activity, acting on paired donors, with incorporation or reduction of molecular oxygen, reduced iron-sulfur protein as one donor, and incorporation of one atom of oxygen	4	5	9	17	0.00931	0.166053	TRINITY_DN10602_c0_g1,TRINITY_DN11172_c0_g1,TRINITY_DN15_c0_g1,TRINITY_DN24507_c0_g1	TRINITY_DN10886_c0_g1,TRINITY_DN1407_c0_g1,TRINITY_DN15_c0_g2,TRINITY_DN15_c2_g1,TRINITY_DN36654_c0_g1
BP	GO:0002238	response to molecule of fungal origin	4	10	14	32	0.00932	0.166053	TRINITY_DN12125_c0_g1,TRINITY_DN18079_c0_g1,TRINITY_DN5598_c1_g2,TRINITY_DN8530_c2_g1	TRINITY_DN10159_c0_g1,TRINITY_DN14962_c0_g1,TRINITY_DN1533_c0_g4,TRINITY_DN1533_c0_g6,TRINITY_DN1533_c1_g1,TRINITY_DN16953_c0_g1,TRINITY_DN19752_c0_g1,TRINITY_DN22517_c0_g1,TRINITY_DN4183_c0_g1,TRINITY_DN7369_c0_g2
BP	GO:0046688	response to copper ion	5	6	11	23	0.0094	0.166841	TRINITY_DN14214_c0_g1,TRINITY_DN14214_c0_g2,TRINITY_DN26635_c0_g1,TRINITY_DN31702_c0_g1,TRINITY_DN7381_c0_g1	TRINITY_DN108440_c0_g1,TRINITY_DN28073_c0_g1,TRINITY_DN37_c0_g1,TRINITY_DN4250_c0_g1,TRINITY_DN7418_c0_g1,TRINITY_DN8028_c0_g1
BP	GO:0090506	axillary shoot meristem initiation	4	7	11	23	0.0094	0.166841	TRINITY_DN5727_c1_g1,TRINITY_DN6607_c0_g1,TRINITY_DN6607_c0_g2,TRINITY_DN7211_c0_g1	TRINITY_DN102475_c0_g1,TRINITY_DN120622_c0_g1,TRINITY_DN12337_c0_g1,TRINITY_DN12337_c0_g2,TRINITY_DN16150_c0_g1,TRINITY_DN19756_c0_g2,TRINITY_DN9723_c0_g1
BP	GO:0009166	nucleotide catabolic process	9	53	62	200	0.0095	0.168296	TRINITY_DN11424_c0_g1,TRINITY_DN11424_c0_g2,TRINITY_DN15968_c0_g1,TRINITY_DN16711_c0_g1,TRINITY_DN18210_c0_g1,TRINITY_DN18403_c0_g1,TRINITY_DN20713_c0_g1,TRINITY_DN480_c0_g2,TRINITY_DN8791_c0_g1	TRINITY_DN100563_c0_g1,TRINITY_DN104775_c0_g1,TRINITY_DN10761_c0_g1,TRINITY_DN107707_c0_g1,TRINITY_DN11577_c0_g1,TRINITY_DN116721_c0_g1,TRINITY_DN116881_c0_g1,TRINITY_DN118773_c0_g1,TRINITY_DN13293_c0_g1,TRINITY_DN13640_c0_g1,TRINITY_DN13783_c0_g2,TRINITY_DN15111_c0_g1,TRINITY_DN1637_c0_g1,TRINITY_DN16476_c0_g1,TRINITY_DN17334_c1_g1,TRINITY_DN18919_c0_g1,TRINITY_DN21146_c0_g2,TRINITY_DN21146_c1_g…
BP	GO:0006537	glutamate biosynthetic process	4	8	12	26	0.00954	0.168685	TRINITY_DN10978_c0_g2,TRINITY_DN18933_c0_g1,TRINITY_DN23377_c0_g1,TRINITY_DN27891_c0_g1	TRINITY_DN108003_c0_g1,TRINITY_DN11038_c0_g1,TRINITY_DN22759_c0_g1,TRINITY_DN23280_c0_g1,TRINITY_DN25167_c0_g1,TRINITY_DN25366_c0_g1,TRINITY_DN32440_c0_g1,TRINITY_DN612_c0_g1
BP	GO:0046500	S-adenosylmethionine metabolic process	1	18	19	48	0.00971	0.171366	TRINITY_DN857_c0_g1	TRINITY_DN11872_c0_g1,TRINITY_DN11872_c0_g2,TRINITY_DN118738_c0_g1,TRINITY_DN14336_c1_g2,TRINITY_DN18242_c0_g1,TRINITY_DN25840_c0_g1,TRINITY_DN27178_c0_g1,TRINITY_DN27178_c0_g2,TRINITY_DN2969_c0_g1,TRINITY_DN33872_c0_g1,TRINITY_DN34567_c0_g1,TRINITY_DN43901_c0_g1,TRINITY_DN43901_c0_g2,TRINITY_DN43901_c0_g3,TRINITY_DN5017_c2_g1,TRINITY_DN6233_c0_g2,TRINITY_DN70330_c0_g1,TRINITY_DN8574_c0_g1
BP	GO:0042594	response to starvation	36	66	102	351	0.00974	0.171424	TRINITY_DN10019_c0_g1,TRINITY_DN10301_c0_g1,TRINITY_DN110770_c0_g1,TRINITY_DN130_c0_g2,TRINITY_DN13916_c0_g1,TRINITY_DN15097_c0_g1,TRINITY_DN15944_c0_g1,TRINITY_DN16342_c0_g1,TRINITY_DN18143_c0_g1,TRINITY_DN1906_c0_g1,TRINITY_DN23656_c0_g1,TRINITY_DN32951_c0_g1,TRINITY_DN35814_c0_g2,TRINITY_DN3666_c0_g1,TRINITY_DN4098_c0_g1,TRINITY_DN506_c0_g3,TRINITY_DN5410_c0_g1,TRINITY_DN5655_c0_g1,TRINITY_DN5…	TRINITY_DN101081_c0_g1,TRINITY_DN10169_c0_g1,TRINITY_DN1038_c0_g1,TRINITY_DN104775_c0_g1,TRINITY_DN10802_c0_g1,TRINITY_DN110319_c0_g1,TRINITY_DN11148_c0_g1,TRINITY_DN11383_c0_g1,TRINITY_DN11395_c0_g1,TRINITY_DN11604_c0_g3,TRINITY_DN120800_c0_g1,TRINITY_DN120925_c0_g1,TRINITY_DN12259_c0_g1,TRINITY_DN123064_c0_g1,TRINITY_DN12356_c0_g1,TRINITY_DN123668_c0_g1,TRINITY_DN13225_c0_g1,TRINITY_DN13640_c0_…
BP	GO:0016042	lipid catabolic process	35	73	108	374	0.00975	0.171424	TRINITY_DN10082_c0_g1,TRINITY_DN10976_c0_g1,TRINITY_DN1104_c0_g4,TRINITY_DN113401_c0_g1,TRINITY_DN11342_c0_g1,TRINITY_DN120880_c0_g1,TRINITY_DN12999_c0_g2,TRINITY_DN13309_c0_g1,TRINITY_DN1334_c0_g1,TRINITY_DN14886_c0_g1,TRINITY_DN15978_c0_g1,TRINITY_DN16071_c0_g1,TRINITY_DN17109_c0_g1,TRINITY_DN19585_c0_g1,TRINITY_DN20502_c0_g1,TRINITY_DN24058_c0_g1,TRINITY_DN2439_c0_g3,TRINITY_DN26362_c0_g1,TRIN…	TRINITY_DN103592_c0_g1,TRINITY_DN104775_c0_g1,TRINITY_DN105499_c0_g1,TRINITY_DN10922_c0_g1,TRINITY_DN11025_c0_g1,TRINITY_DN112785_c0_g1,TRINITY_DN112932_c0_g1,TRINITY_DN113810_c0_g1,TRINITY_DN114191_c0_g1,TRINITY_DN118052_c0_g1,TRINITY_DN120888_c0_g1,TRINITY_DN12721_c0_g1,TRINITY_DN12721_c0_g2,TRINITY_DN12766_c0_g1,TRINITY_DN12766_c0_g2,TRINITY_DN13285_c0_g1,TRINITY_DN13480_c0_g1,TRINITY_DN13640_…
BP	GO:0008354	germ cell migration	0	5	5	7	0.00986	0.171595	-	TRINITY_DN108916_c0_g1,TRINITY_DN21589_c0_g1,TRINITY_DN26234_c0_g1,TRINITY_DN51292_c0_g1,TRINITY_DN84752_c0_g1
BP	GO:0016080	synaptic vesicle targeting	3	2	5	7	0.00986	0.171595	TRINITY_DN11700_c0_g1,TRINITY_DN19195_c0_g1,TRINITY_DN8035_c0_g1	TRINITY_DN11402_c0_g1,TRINITY_DN948_c4_g1
BP	GO:0016081	synaptic vesicle docking	3	2	5	7	0.00986	0.171595	TRINITY_DN11700_c0_g1,TRINITY_DN19195_c0_g1,TRINITY_DN8035_c0_g1	TRINITY_DN11402_c0_g1,TRINITY_DN948_c4_g1
BP	GO:0030388	fructose 1,6-bisphosphate metabolic process	3	2	5	7	0.00986	0.171595	TRINITY_DN11080_c1_g1,TRINITY_DN11701_c0_g1,TRINITY_DN7965_c0_g1	TRINITY_DN14923_c0_g1,TRINITY_DN16077_c0_g1
BP	GO:0071585	detoxification of cadmium ion	1	4	5	7	0.00986	0.171595	TRINITY_DN76028_c0_g1	TRINITY_DN44362_c0_g1,TRINITY_DN51551_c0_g1,TRINITY_DN58432_c0_g1,TRINITY_DN6930_c0_g1
MF	GO:0043531	ADP binding	9	38	47	143	0.00987	0.171595	TRINITY_DN12200_c0_g2,TRINITY_DN17905_c0_g1,TRINITY_DN18079_c0_g1,TRINITY_DN1896_c0_g3,TRINITY_DN22206_c0_g1,TRINITY_DN22206_c1_g1,TRINITY_DN24006_c0_g2,TRINITY_DN26372_c0_g1,TRINITY_DN5598_c1_g2	TRINITY_DN100389_c0_g1,TRINITY_DN102_c0_g4,TRINITY_DN102_c1_g1,TRINITY_DN109846_c0_g1,TRINITY_DN12918_c0_g1,TRINITY_DN13513_c0_g1,TRINITY_DN14092_c1_g1,TRINITY_DN15036_c0_g1,TRINITY_DN16428_c0_g1,TRINITY_DN1722_c0_g3,TRINITY_DN17905_c0_g2,TRINITY_DN1866_c0_g1,TRINITY_DN1866_c0_g2,TRINITY_DN1892_c0_g1,TRINITY_DN1896_c0_g2,TRINITY_DN19449_c0_g1,TRINITY_DN19449_c0_g2,TRINITY_DN1956_c0_g2,TRINITY_DN1…
BP	GO:0019362	pyridine nucleotide metabolic process	12	71	83	279	0.00995	0.172664	TRINITY_DN101097_c0_g1,TRINITY_DN11424_c0_g1,TRINITY_DN11424_c0_g2,TRINITY_DN1442_c1_g1,TRINITY_DN15968_c0_g1,TRINITY_DN16711_c0_g1,TRINITY_DN17982_c0_g1,TRINITY_DN18403_c0_g1,TRINITY_DN20713_c0_g1,TRINITY_DN4703_c1_g1,TRINITY_DN480_c0_g2,TRINITY_DN8791_c0_g1	TRINITY_DN100563_c0_g1,TRINITY_DN103933_c0_g1,TRINITY_DN10761_c0_g1,TRINITY_DN107707_c0_g1,TRINITY_DN11577_c0_g1,TRINITY_DN116721_c0_g1,TRINITY_DN116881_c0_g1,TRINITY_DN118773_c0_g1,TRINITY_DN121663_c0_g1,TRINITY_DN13293_c0_g1,TRINITY_DN13783_c0_g2,TRINITY_DN15111_c0_g1,TRINITY_DN15729_c0_g2,TRINITY_DN1637_c0_g1,TRINITY_DN16476_c0_g1,TRINITY_DN17334_c1_g1,TRINITY_DN17650_c0_g1,TRINITY_DN18320_c0_…
BP	GO:0071484	cellular response to light intensity	3	4	7	12	0.01017	0.176154	TRINITY_DN12003_c0_g1,TRINITY_DN25052_c0_g1,TRINITY_DN5181_c0_g1	TRINITY_DN28073_c0_g1,TRINITY_DN4250_c0_g1,TRINITY_DN5514_c0_g1,TRINITY_DN7418_c0_g1
MF	GO:0015205	nucleobase transmembrane transporter activity	1	9	10	20	0.01024	0.177038	TRINITY_DN630_c0_g1	TRINITY_DN11072_c0_g1,TRINITY_DN12100_c0_g1,TRINITY_DN15394_c0_g1,TRINITY_DN20863_c0_g1,TRINITY_DN2304_c0_g1,TRINITY_DN2614_c0_g1,TRINITY_DN29253_c0_g1,TRINITY_DN69365_c1_g1,TRINITY_DN937_c0_g1
BP	GO:0009124	nucleoside monophosphate biosynthetic process	19	88	107	371	0.01044	0.180162	TRINITY_DN11387_c0_g1,TRINITY_DN11424_c0_g1,TRINITY_DN11424_c0_g2,TRINITY_DN12595_c0_g1,TRINITY_DN15968_c0_g1,TRINITY_DN16711_c0_g1,TRINITY_DN16733_c0_g2,TRINITY_DN18403_c0_g1,TRINITY_DN20713_c0_g1,TRINITY_DN3274_c0_g1,TRINITY_DN4133_c0_g1,TRINITY_DN4632_c0_g1,TRINITY_DN480_c0_g2,TRINITY_DN4978_c0_g1,TRINITY_DN5076_c0_g1,TRINITY_DN5414_c0_g1,TRINITY_DN61566_c0_g1,TRINITY_DN7802_c0_g1,TRINITY_DN87…	TRINITY_DN100563_c0_g1,TRINITY_DN104775_c0_g1,TRINITY_DN10761_c0_g1,TRINITY_DN107701_c0_g1,TRINITY_DN107707_c0_g1,TRINITY_DN109180_c0_g1,TRINITY_DN113408_c0_g1,TRINITY_DN11577_c0_g1,TRINITY_DN116721_c0_g1,TRINITY_DN116881_c0_g1,TRINITY_DN118773_c0_g1,TRINITY_DN12336_c0_g1,TRINITY_DN12676_c0_g1,TRINITY_DN13293_c0_g1,TRINITY_DN13640_c0_g1,TRINITY_DN13783_c0_g2,TRINITY_DN15111_c0_g1,TRINITY_DN15900_…
MF	GO:0022804	active transmembrane transporter activity	71	171	242	886	0.0106	0.181788	TRINITY_DN10248_c0_g3,TRINITY_DN10248_c0_g4,TRINITY_DN103517_c0_g1,TRINITY_DN10775_c0_g1,TRINITY_DN10895_c0_g1,TRINITY_DN10918_c0_g1,TRINITY_DN11059_c0_g1,TRINITY_DN112480_c0_g1,TRINITY_DN11262_c0_g1,TRINITY_DN11387_c0_g1,TRINITY_DN1179_c0_g2,TRINITY_DN11988_c0_g1,TRINITY_DN11997_c0_g1,TRINITY_DN12417_c0_g1,TRINITY_DN12970_c0_g1,TRINITY_DN12994_c0_g1,TRINITY_DN13229_c0_g1,TRINITY_DN13593_c0_g1,TR…	TRINITY_DN101214_c0_g1,TRINITY_DN10368_c0_g1,TRINITY_DN1038_c0_g1,TRINITY_DN104909_c0_g1,TRINITY_DN107701_c0_g1,TRINITY_DN108718_c0_g1,TRINITY_DN109375_c0_g1,TRINITY_DN11072_c0_g1,TRINITY_DN11100_c0_g1,TRINITY_DN113365_c0_g1,TRINITY_DN113408_c0_g1,TRINITY_DN11340_c0_g1,TRINITY_DN11367_c0_g1,TRINITY_DN11499_c0_g1,TRINITY_DN117742_c0_g1,TRINITY_DN11790_c0_g1,TRINITY_DN11791_c0_g1,TRINITY_DN11920_c0…
BP	GO:0042538	hyperosmotic salinity response	14	17	31	89	0.01066	0.181788	TRINITY_DN10534_c0_g1,TRINITY_DN112830_c0_g1,TRINITY_DN11643_c0_g1,TRINITY_DN11643_c0_g2,TRINITY_DN12046_c0_g1,TRINITY_DN16079_c0_g1,TRINITY_DN1858_c0_g1,TRINITY_DN1901_c0_g1,TRINITY_DN2367_c0_g1,TRINITY_DN25281_c0_g1,TRINITY_DN6912_c1_g1,TRINITY_DN8369_c0_g1,TRINITY_DN9438_c0_g2,TRINITY_DN9939_c0_g1	TRINITY_DN100489_c0_g1,TRINITY_DN100625_c0_g1,TRINITY_DN103891_c0_g1,TRINITY_DN107924_c0_g1,TRINITY_DN11190_c0_g1,TRINITY_DN12046_c0_g2,TRINITY_DN1553_c0_g1,TRINITY_DN15923_c0_g1,TRINITY_DN159_c0_g3,TRINITY_DN17815_c0_g1,TRINITY_DN22196_c0_g1,TRINITY_DN25820_c0_g1,TRINITY_DN36426_c0_g1,TRINITY_DN37587_c0_g3,TRINITY_DN55503_c0_g3,TRINITY_DN5845_c0_g1,TRINITY_DN7242_c0_g1
MF	GO:0016041	glutamate synthase (ferredoxin) activity	2	3	5	7	0.01068	0.181788	TRINITY_DN10978_c0_g2,TRINITY_DN18933_c0_g1	TRINITY_DN11038_c0_g1,TRINITY_DN22759_c0_g1,TRINITY_DN612_c0_g1
MF	GO:0016207	4-coumarate-CoA ligase activity	1	4	5	7	0.01068	0.181788	TRINITY_DN10778_c0_g1	TRINITY_DN10778_c1_g1,TRINITY_DN112628_c0_g1,TRINITY_DN12248_c0_g1,TRINITY_DN1689_c0_g1
MF	GO:0016643	oxidoreductase activity, acting on the CH-NH2 group of donors, iron-sulfur protein as acceptor	2	3	5	7	0.01068	0.181788	TRINITY_DN10978_c0_g2,TRINITY_DN18933_c0_g1	TRINITY_DN11038_c0_g1,TRINITY_DN22759_c0_g1,TRINITY_DN612_c0_g1
MF	GO:0045486	naringenin 3-dioxygenase activity	3	2	5	7	0.01068	0.181788	TRINITY_DN13471_c0_g1,TRINITY_DN15409_c0_g1,TRINITY_DN16051_c0_g1	TRINITY_DN14238_c0_g1,TRINITY_DN2213_c0_g1
BP	GO:0009627	systemic acquired resistance	18	15	33	96	0.01069	0.181788	TRINITY_DN1026_c0_g1,TRINITY_DN10975_c0_g1,TRINITY_DN10975_c0_g2,TRINITY_DN113401_c0_g1,TRINITY_DN11417_c0_g2,TRINITY_DN13512_c0_g2,TRINITY_DN1742_c0_g1,TRINITY_DN17923_c0_g4,TRINITY_DN1992_c0_g1,TRINITY_DN20502_c0_g1,TRINITY_DN2284_c0_g1,TRINITY_DN2439_c0_g3,TRINITY_DN273_c0_g1,TRINITY_DN30884_c1_g1,TRINITY_DN3323_c0_g1,TRINITY_DN3333_c0_g1,TRINITY_DN4554_c2_g1,TRINITY_DN6393_c1_g1	TRINITY_DN12766_c0_g1,TRINITY_DN12766_c0_g2,TRINITY_DN13512_c0_g1,TRINITY_DN17795_c0_g1,TRINITY_DN1823_c0_g1,TRINITY_DN24987_c1_g1,TRINITY_DN273_c0_g2,TRINITY_DN27816_c0_g1,TRINITY_DN2823_c1_g1,TRINITY_DN3249_c2_g1,TRINITY_DN4001_c0_g1,TRINITY_DN4089_c0_g1,TRINITY_DN4164_c0_g2,TRINITY_DN5432_c0_g1,TRINITY_DN6095_c0_g1
BP	GO:0071470	cellular response to osmotic stress	6	27	33	96	0.01069	0.181788	TRINITY_DN10917_c0_g1,TRINITY_DN112157_c0_g1,TRINITY_DN1858_c0_g1,TRINITY_DN40673_c0_g1,TRINITY_DN8607_c0_g1,TRINITY_DN8872_c0_g1	TRINITY_DN1065_c0_g1,TRINITY_DN11525_c0_g1,TRINITY_DN130_c0_g3,TRINITY_DN16684_c0_g1,TRINITY_DN167_c1_g1,TRINITY_DN178_c0_g1,TRINITY_DN18609_c0_g1,TRINITY_DN18728_c0_g1,TRINITY_DN197_c0_g3,TRINITY_DN21585_c0_g1,TRINITY_DN22153_c0_g1,TRINITY_DN22492_c0_g1,TRINITY_DN26700_c0_g2,TRINITY_DN28073_c0_g1,TRINITY_DN4250_c0_g1,TRINITY_DN5026_c0_g1,TRINITY_DN51463_c0_g1,TRINITY_DN52548_c0_g2,TRINITY_DN5655…
BP	GO:0044249	cellular biosynthetic process	555	1466	2021	8274	0.01084	0.184004	TRINITY_DN10019_c0_g1,TRINITY_DN10022_c0_g1,TRINITY_DN10050_c1_g1,TRINITY_DN10053_c0_g1,TRINITY_DN10053_c0_g2,TRINITY_DN10130_c0_g1,TRINITY_DN101353_c0_g1,TRINITY_DN10167_c0_g1,TRINITY_DN10179_c0_g1,TRINITY_DN10195_c0_g1,TRINITY_DN1026_c0_g1,TRINITY_DN10301_c0_g1,TRINITY_DN10320_c0_g1,TRINITY_DN103534_c0_g1,TRINITY_DN103968_c0_g1,TRINITY_DN10401_c0_g1,TRINITY_DN10422_c0_g1,TRINITY_DN10427_c0_g1,T…	TRINITY_DN100009_c0_g1,TRINITY_DN10012_c0_g1,TRINITY_DN100343_c0_g1,TRINITY_DN100388_c0_g1,TRINITY_DN100406_c0_g1,TRINITY_DN100544_c0_g1,TRINITY_DN100563_c0_g1,TRINITY_DN100625_c0_g1,TRINITY_DN100728_c0_g1,TRINITY_DN100779_c0_g1,TRINITY_DN100824_c0_g1,TRINITY_DN100860_c0_g1,TRINITY_DN100883_c0_g1,TRINITY_DN1008_c0_g1,TRINITY_DN100983_c0_g1,TRINITY_DN101058_c0_g1,TRINITY_DN101175_c0_g1,TRINITY_DN1…
MF	GO:0030060	L-malate dehydrogenase activity	0	12	12	26	0.01103	0.186889	-	TRINITY_DN103933_c0_g1,TRINITY_DN13352_c0_g1,TRINITY_DN21263_c0_g1,TRINITY_DN22964_c0_g1,TRINITY_DN31249_c0_g2,TRINITY_DN34459_c0_g1,TRINITY_DN37048_c0_g1,TRINITY_DN38077_c0_g1,TRINITY_DN3829_c0_g1,TRINITY_DN57285_c0_g1,TRINITY_DN91018_c0_g1,TRINITY_DN94527_c0_g1
BP	GO:0009737	response to abscisic acid	103	173	276	1038	0.01105	0.186889	TRINITY_DN10007_c0_g1,TRINITY_DN10157_c1_g2,TRINITY_DN10422_c0_g1,TRINITY_DN10681_c0_g1,TRINITY_DN10917_c0_g1,TRINITY_DN10918_c0_g1,TRINITY_DN1104_c0_g4,TRINITY_DN11050_c0_g1,TRINITY_DN112015_c0_g1,TRINITY_DN112830_c0_g1,TRINITY_DN113081_c0_g1,TRINITY_DN11355_c0_g1,TRINITY_DN11424_c0_g1,TRINITY_DN11519_c0_g1,TRINITY_DN11643_c0_g1,TRINITY_DN11643_c0_g2,TRINITY_DN117184_c0_g1,TRINITY_DN1171_c1_g1,T…	TRINITY_DN100633_c0_g1,TRINITY_DN10159_c0_g1,TRINITY_DN1031_c0_g1,TRINITY_DN105270_c0_g1,TRINITY_DN10596_c0_g1,TRINITY_DN1065_c0_g1,TRINITY_DN107883_c0_g1,TRINITY_DN107992_c0_g1,TRINITY_DN108044_c0_g1,TRINITY_DN1093_c0_g1,TRINITY_DN109508_c0_g1,TRINITY_DN110034_c0_g1,TRINITY_DN112543_c0_g1,TRINITY_DN11302_c0_g2,TRINITY_DN11460_c0_g1,TRINITY_DN11548_c0_g1,TRINITY_DN1171_c0_g1,TRINITY_DN12046_c0_g2…
MF	GO:0050062	long-chain-fatty-acyl-CoA reductase activity	0	7	7	12	0.01125	0.189928	-	TRINITY_DN12747_c0_g1,TRINITY_DN21181_c0_g1,TRINITY_DN23180_c0_g1,TRINITY_DN2475_c0_g1,TRINITY_DN2475_c0_g2,TRINITY_DN59168_c0_g1,TRINITY_DN7382_c0_g1
BP	GO:0044271	cellular nitrogen compound biosynthetic process	394	1129	1523	6185	0.01136	0.191439	TRINITY_DN10019_c0_g1,TRINITY_DN10022_c0_g1,TRINITY_DN10050_c1_g1,TRINITY_DN10053_c0_g1,TRINITY_DN10053_c0_g2,TRINITY_DN10130_c0_g1,TRINITY_DN10167_c0_g1,TRINITY_DN10179_c0_g1,TRINITY_DN10195_c0_g1,TRINITY_DN1026_c0_g1,TRINITY_DN10301_c0_g1,TRINITY_DN10320_c0_g1,TRINITY_DN103534_c0_g1,TRINITY_DN10401_c0_g1,TRINITY_DN10422_c0_g1,TRINITY_DN10462_c0_g1,TRINITY_DN10505_c0_g1,TRINITY_DN105440_c0_g1,TR…	TRINITY_DN100343_c0_g1,TRINITY_DN100388_c0_g1,TRINITY_DN100406_c0_g1,TRINITY_DN100544_c0_g1,TRINITY_DN100563_c0_g1,TRINITY_DN100625_c0_g1,TRINITY_DN100728_c0_g1,TRINITY_DN100779_c0_g1,TRINITY_DN100824_c0_g1,TRINITY_DN100860_c0_g1,TRINITY_DN100883_c0_g1,TRINITY_DN1008_c0_g1,TRINITY_DN100983_c0_g1,TRINITY_DN101058_c0_g1,TRINITY_DN101175_c0_g1,TRINITY_DN101198_c0_g1,TRINITY_DN10135_c0_g2,TRINITY_DN1…
BP	GO:0015914	phospholipid transport	4	19	23	62	0.01156	0.193747	TRINITY_DN12584_c0_g1,TRINITY_DN241_c1_g2,TRINITY_DN25953_c0_g1,TRINITY_DN8963_c0_g2	TRINITY_DN14156_c0_g1,TRINITY_DN1522_c0_g1,TRINITY_DN16388_c1_g1,TRINITY_DN16388_c1_g2,TRINITY_DN25487_c0_g1,TRINITY_DN25511_c0_g1,TRINITY_DN25511_c0_g2,TRINITY_DN293_c0_g1,TRINITY_DN31509_c0_g1,TRINITY_DN31666_c0_g2,TRINITY_DN34472_c0_g1,TRINITY_DN36360_c0_g1,TRINITY_DN37150_c0_g1,TRINITY_DN39446_c0_g1,TRINITY_DN4036_c2_g1,TRINITY_DN5902_c0_g1,TRINITY_DN762_c0_g1,TRINITY_DN82197_c0_g1,TRINITY_DN…
BP	GO:0006558	L-phenylalanine metabolic process	1	15	16	39	0.01158	0.193747	TRINITY_DN15872_c0_g3	TRINITY_DN113026_c0_g1,TRINITY_DN11302_c0_g2,TRINITY_DN116827_c0_g1,TRINITY_DN14281_c1_g1,TRINITY_DN15872_c0_g1,TRINITY_DN18956_c0_g2,TRINITY_DN2572_c0_g1,TRINITY_DN29856_c0_g1,TRINITY_DN309_c0_g1,TRINITY_DN40424_c0_g1,TRINITY_DN541_c0_g1,TRINITY_DN62815_c0_g1,TRINITY_DN6330_c0_g1,TRINITY_DN7394_c1_g1,TRINITY_DN87654_c0_g1
BP	GO:1902221	erythrose 4-phosphate/phosphoenolpyruvate family amino acid metabolic process	1	15	16	39	0.01158	0.193747	TRINITY_DN15872_c0_g3	TRINITY_DN113026_c0_g1,TRINITY_DN11302_c0_g2,TRINITY_DN116827_c0_g1,TRINITY_DN14281_c1_g1,TRINITY_DN15872_c0_g1,TRINITY_DN18956_c0_g2,TRINITY_DN2572_c0_g1,TRINITY_DN29856_c0_g1,TRINITY_DN309_c0_g1,TRINITY_DN40424_c0_g1,TRINITY_DN541_c0_g1,TRINITY_DN62815_c0_g1,TRINITY_DN6330_c0_g1,TRINITY_DN7394_c1_g1,TRINITY_DN87654_c0_g1
BP	GO:1903409	reactive oxygen species biosynthetic process	6	10	16	39	0.01158	0.193747	TRINITY_DN1570_c0_g2,TRINITY_DN19123_c0_g1,TRINITY_DN6261_c0_g1,TRINITY_DN7923_c0_g1,TRINITY_DN796_c0_g1,TRINITY_DN8318_c0_g1	TRINITY_DN1065_c0_g1,TRINITY_DN114002_c0_g1,TRINITY_DN11707_c0_g1,TRINITY_DN19162_c0_g1,TRINITY_DN25896_c0_g1,TRINITY_DN5687_c0_g1,TRINITY_DN602_c0_g1,TRINITY_DN71797_c0_g1,TRINITY_DN71_c0_g1,TRINITY_DN71_c0_g2
BP	GO:0009199	ribonucleoside triphosphate metabolic process	13	103	116	407	0.01161	0.193902	TRINITY_DN11387_c0_g1,TRINITY_DN11424_c0_g1,TRINITY_DN11424_c0_g2,TRINITY_DN15968_c0_g1,TRINITY_DN16711_c0_g1,TRINITY_DN16989_c0_g1,TRINITY_DN18403_c0_g1,TRINITY_DN20713_c0_g1,TRINITY_DN4632_c0_g1,TRINITY_DN480_c0_g2,TRINITY_DN4978_c0_g1,TRINITY_DN61566_c0_g1,TRINITY_DN8791_c0_g1	TRINITY_DN100563_c0_g1,TRINITY_DN101674_c0_g1,TRINITY_DN104775_c0_g1,TRINITY_DN10625_c0_g1,TRINITY_DN10761_c0_g1,TRINITY_DN107701_c0_g1,TRINITY_DN107707_c0_g1,TRINITY_DN113408_c0_g1,TRINITY_DN11577_c0_g1,TRINITY_DN116721_c0_g1,TRINITY_DN116881_c0_g1,TRINITY_DN117258_c0_g1,TRINITY_DN118773_c0_g1,TRINITY_DN120513_c0_g1,TRINITY_DN12336_c0_g1,TRINITY_DN12676_c0_g1,TRINITY_DN13293_c0_g1,TRINITY_DN1364…
BP	GO:0009156	ribonucleoside monophosphate biosynthetic process	17	87	104	361	0.01182	0.197056	TRINITY_DN11387_c0_g1,TRINITY_DN11424_c0_g1,TRINITY_DN11424_c0_g2,TRINITY_DN12595_c0_g1,TRINITY_DN15968_c0_g1,TRINITY_DN16711_c0_g1,TRINITY_DN18403_c0_g1,TRINITY_DN20713_c0_g1,TRINITY_DN3274_c0_g1,TRINITY_DN4133_c0_g1,TRINITY_DN4632_c0_g1,TRINITY_DN480_c0_g2,TRINITY_DN4978_c0_g1,TRINITY_DN5076_c0_g1,TRINITY_DN5414_c0_g1,TRINITY_DN61566_c0_g1,TRINITY_DN8791_c0_g1	TRINITY_DN100563_c0_g1,TRINITY_DN104775_c0_g1,TRINITY_DN10761_c0_g1,TRINITY_DN107701_c0_g1,TRINITY_DN107707_c0_g1,TRINITY_DN109180_c0_g1,TRINITY_DN113408_c0_g1,TRINITY_DN11577_c0_g1,TRINITY_DN116721_c0_g1,TRINITY_DN116881_c0_g1,TRINITY_DN118773_c0_g1,TRINITY_DN12336_c0_g1,TRINITY_DN12676_c0_g1,TRINITY_DN13293_c0_g1,TRINITY_DN13640_c0_g1,TRINITY_DN13783_c0_g2,TRINITY_DN15111_c0_g1,TRINITY_DN15900_…
BP	GO:1901292	nucleoside phosphate catabolic process	9	53	62	202	0.01189	0.19787	TRINITY_DN11424_c0_g1,TRINITY_DN11424_c0_g2,TRINITY_DN15968_c0_g1,TRINITY_DN16711_c0_g1,TRINITY_DN18210_c0_g1,TRINITY_DN18403_c0_g1,TRINITY_DN20713_c0_g1,TRINITY_DN480_c0_g2,TRINITY_DN8791_c0_g1	TRINITY_DN100563_c0_g1,TRINITY_DN104775_c0_g1,TRINITY_DN10761_c0_g1,TRINITY_DN107707_c0_g1,TRINITY_DN11577_c0_g1,TRINITY_DN116721_c0_g1,TRINITY_DN116881_c0_g1,TRINITY_DN118773_c0_g1,TRINITY_DN13293_c0_g1,TRINITY_DN13640_c0_g1,TRINITY_DN13783_c0_g2,TRINITY_DN15111_c0_g1,TRINITY_DN1637_c0_g1,TRINITY_DN16476_c0_g1,TRINITY_DN17334_c1_g1,TRINITY_DN18919_c0_g1,TRINITY_DN21146_c0_g2,TRINITY_DN21146_c1_g…
BP	GO:0019319	hexose biosynthetic process	10	15	25	69	0.01209	0.20084	TRINITY_DN11080_c1_g1,TRINITY_DN11424_c0_g1,TRINITY_DN11424_c0_g2,TRINITY_DN11701_c0_g1,TRINITY_DN15968_c0_g1,TRINITY_DN1906_c0_g1,TRINITY_DN5385_c0_g1,TRINITY_DN6291_c0_g1,TRINITY_DN6904_c0_g2,TRINITY_DN7965_c0_g1	TRINITY_DN100563_c0_g1,TRINITY_DN104775_c0_g1,TRINITY_DN11604_c0_g3,TRINITY_DN116881_c0_g1,TRINITY_DN12356_c0_g1,TRINITY_DN13293_c0_g1,TRINITY_DN13640_c0_g1,TRINITY_DN14923_c0_g1,TRINITY_DN16077_c0_g1,TRINITY_DN16476_c0_g1,TRINITY_DN18919_c0_g1,TRINITY_DN3733_c0_g1,TRINITY_DN4588_c0_g2,TRINITY_DN924_c0_g1,TRINITY_DN9548_c0_g1
BP	GO:0006835	dicarboxylic acid transport	6	9	15	36	0.01218	0.201618	TRINITY_DN11382_c0_g1,TRINITY_DN14581_c0_g1,TRINITY_DN16702_c0_g1,TRINITY_DN22826_c0_g1,TRINITY_DN3110_c0_g1,TRINITY_DN4315_c0_g1	TRINITY_DN11791_c0_g1,TRINITY_DN121060_c0_g1,TRINITY_DN15017_c0_g1,TRINITY_DN18646_c0_g1,TRINITY_DN24070_c0_g1,TRINITY_DN2469_c0_g1,TRINITY_DN56485_c0_g2,TRINITY_DN84236_c0_g1,TRINITY_DN9643_c0_g1
BP	GO:0006836	neurotransmitter transport	4	11	15	36	0.01218	0.201618	TRINITY_DN11700_c0_g1,TRINITY_DN19195_c0_g1,TRINITY_DN3110_c0_g1,TRINITY_DN8035_c0_g1	TRINITY_DN11402_c0_g1,TRINITY_DN11791_c0_g1,TRINITY_DN26364_c0_g1,TRINITY_DN28037_c0_g1,TRINITY_DN30499_c0_g1,TRINITY_DN32112_c0_g2,TRINITY_DN47328_c0_g1,TRINITY_DN5958_c0_g1,TRINITY_DN61845_c0_g1,TRINITY_DN948_c4_g1,TRINITY_DN9643_c0_g1
BP	GO:0042866	pyruvate biosynthetic process	8	48	56	180	0.01221	0.201757	TRINITY_DN11424_c0_g1,TRINITY_DN11424_c0_g2,TRINITY_DN15968_c0_g1,TRINITY_DN16711_c0_g1,TRINITY_DN18403_c0_g1,TRINITY_DN20713_c0_g1,TRINITY_DN480_c0_g2,TRINITY_DN8791_c0_g1	TRINITY_DN100563_c0_g1,TRINITY_DN10761_c0_g1,TRINITY_DN107707_c0_g1,TRINITY_DN11577_c0_g1,TRINITY_DN116721_c0_g1,TRINITY_DN116881_c0_g1,TRINITY_DN118773_c0_g1,TRINITY_DN13293_c0_g1,TRINITY_DN13783_c0_g2,TRINITY_DN15111_c0_g1,TRINITY_DN1637_c0_g1,TRINITY_DN16476_c0_g1,TRINITY_DN17334_c1_g1,TRINITY_DN18919_c0_g1,TRINITY_DN21146_c0_g2,TRINITY_DN21146_c1_g1,TRINITY_DN21148_c0_g3,TRINITY_DN22450_c0_g1…
BP	GO:0006995	cellular response to nitrogen starvation	4	15	19	49	0.01242	0.202253	TRINITY_DN130_c0_g2,TRINITY_DN18143_c0_g1,TRINITY_DN6978_c0_g1,TRINITY_DN9048_c0_g2	TRINITY_DN101081_c0_g1,TRINITY_DN1038_c0_g1,TRINITY_DN104775_c0_g1,TRINITY_DN10802_c0_g1,TRINITY_DN110319_c0_g1,TRINITY_DN120800_c0_g1,TRINITY_DN12259_c0_g1,TRINITY_DN13640_c0_g1,TRINITY_DN13662_c0_g1,TRINITY_DN17270_c0_g1,TRINITY_DN23370_c0_g1,TRINITY_DN44991_c0_g1,TRINITY_DN49059_c0_g1,TRINITY_DN760_c0_g1,TRINITY_DN8250_c0_g1
BP	GO:0009594	detection of nutrient	0	4	4	5	0.0125	0.202253	-	TRINITY_DN18440_c0_g1,TRINITY_DN23519_c0_g1,TRINITY_DN42739_c0_g1,TRINITY_DN94884_c0_g1
BP	GO:0010086	embryonic root morphogenesis	2	2	4	5	0.0125	0.202253	TRINITY_DN5654_c0_g1,TRINITY_DN8607_c0_g1	TRINITY_DN21585_c0_g1,TRINITY_DN71602_c0_g1
BP	GO:0010938	cytoplasmic microtubule depolymerization	0	4	4	5	0.0125	0.202253	-	TRINITY_DN24619_c0_g1,TRINITY_DN36583_c0_g1,TRINITY_DN56615_c0_g3,TRINITY_DN8261_c0_g1
BP	GO:0010966	regulation of phosphate transport	2	2	4	5	0.0125	0.202253	TRINITY_DN16129_c0_g1,TRINITY_DN16129_c0_g2	TRINITY_DN1802_c0_g1,TRINITY_DN5355_c0_g1
BP	GO:0046949	fatty-acyl-CoA biosynthetic process	0	4	4	5	0.0125	0.202253	-	TRINITY_DN23047_c0_g2,TRINITY_DN56475_c0_g1,TRINITY_DN89447_c0_g1,TRINITY_DN9043_c0_g1
BP	GO:0060404	axonemal microtubule depolymerization	0	4	4	5	0.0125	0.202253	-	TRINITY_DN24619_c0_g1,TRINITY_DN36583_c0_g1,TRINITY_DN56615_c0_g3,TRINITY_DN8261_c0_g1
BP	GO:0061523	cilium disassembly	0	4	4	5	0.0125	0.202253	-	TRINITY_DN24619_c0_g1,TRINITY_DN36583_c0_g1,TRINITY_DN56615_c0_g3,TRINITY_DN8261_c0_g1
BP	GO:0070050	neuron cellular homeostasis	0	4	4	5	0.0125	0.202253	-	TRINITY_DN104775_c0_g1,TRINITY_DN13640_c0_g1,TRINITY_DN23047_c0_g2,TRINITY_DN9043_c0_g1
BP	GO:0070462	plus-end specific microtubule depolymerization	0	4	4	5	0.0125	0.202253	-	TRINITY_DN24619_c0_g1,TRINITY_DN36583_c0_g1,TRINITY_DN56615_c0_g3,TRINITY_DN8261_c0_g1
BP	GO:0070542	response to fatty acid	0	4	4	5	0.0125	0.202253	-	TRINITY_DN104775_c0_g1,TRINITY_DN13640_c0_g1,TRINITY_DN15922_c0_g1,TRINITY_DN4602_c0_g1
BP	GO:0071398	cellular response to fatty acid	0	4	4	5	0.0125	0.202253	-	TRINITY_DN104775_c0_g1,TRINITY_DN13640_c0_g1,TRINITY_DN15922_c0_g1,TRINITY_DN4602_c0_g1
BP	GO:0006631	fatty acid metabolic process	31	115	146	525	0.01275	0.205941	TRINITY_DN103968_c0_g1,TRINITY_DN104720_c0_g1,TRINITY_DN11172_c0_g1,TRINITY_DN11355_c0_g1,TRINITY_DN11608_c0_g2,TRINITY_DN117158_c0_g1,TRINITY_DN12200_c0_g2,TRINITY_DN12741_c0_g1,TRINITY_DN12766_c1_g1,TRINITY_DN12999_c0_g2,TRINITY_DN14047_c0_g1,TRINITY_DN14532_c0_g1,TRINITY_DN15_c0_g1,TRINITY_DN17109_c0_g1,TRINITY_DN17891_c0_g1,TRINITY_DN19975_c0_g1,TRINITY_DN20717_c0_g2,TRINITY_DN2284_c0_g1,TRIN…	TRINITY_DN10012_c0_g1,TRINITY_DN10425_c1_g1,TRINITY_DN104775_c0_g1,TRINITY_DN105499_c0_g1,TRINITY_DN107670_c0_g1,TRINITY_DN10886_c0_g1,TRINITY_DN11099_c0_g1,TRINITY_DN112600_c0_g1,TRINITY_DN113810_c0_g1,TRINITY_DN114191_c0_g1,TRINITY_DN117087_c0_g1,TRINITY_DN118052_c0_g1,TRINITY_DN11871_c0_g1,TRINITY_DN120888_c0_g1,TRINITY_DN12766_c0_g1,TRINITY_DN12766_c0_g2,TRINITY_DN13634_c0_g1,TRINITY_DN13640_…
BP	GO:0046496	nicotinamide nucleotide metabolic process	12	70	82	278	0.01292	0.207484	TRINITY_DN101097_c0_g1,TRINITY_DN11424_c0_g1,TRINITY_DN11424_c0_g2,TRINITY_DN1442_c1_g1,TRINITY_DN15968_c0_g1,TRINITY_DN16711_c0_g1,TRINITY_DN17982_c0_g1,TRINITY_DN18403_c0_g1,TRINITY_DN20713_c0_g1,TRINITY_DN4703_c1_g1,TRINITY_DN480_c0_g2,TRINITY_DN8791_c0_g1	TRINITY_DN100563_c0_g1,TRINITY_DN103933_c0_g1,TRINITY_DN10761_c0_g1,TRINITY_DN107707_c0_g1,TRINITY_DN11577_c0_g1,TRINITY_DN116721_c0_g1,TRINITY_DN116881_c0_g1,TRINITY_DN118773_c0_g1,TRINITY_DN121663_c0_g1,TRINITY_DN13293_c0_g1,TRINITY_DN13783_c0_g2,TRINITY_DN15111_c0_g1,TRINITY_DN15729_c0_g2,TRINITY_DN1637_c0_g1,TRINITY_DN16476_c0_g1,TRINITY_DN17334_c1_g1,TRINITY_DN17650_c0_g1,TRINITY_DN18320_c0_…
BP	GO:0007365	periodic partitioning	0	3	3	3	0.01308	0.207484	-	TRINITY_DN13320_c0_g1,TRINITY_DN16158_c0_g1,TRINITY_DN17752_c0_g1
BP	GO:0007367	segment polarity determination	0	3	3	3	0.01308	0.207484	-	TRINITY_DN13320_c0_g1,TRINITY_DN16158_c0_g1,TRINITY_DN17752_c0_g1
BP	GO:0010360	negative regulation of anion channel activity	3	0	3	3	0.01308	0.207484	TRINITY_DN13151_c0_g1,TRINITY_DN20489_c0_g1,TRINITY_DN4519_c0_g1	-
BP	GO:0070218	sulfide ion homeostasis	0	3	3	3	0.01308	0.207484	-	TRINITY_DN44362_c0_g1,TRINITY_DN51551_c0_g1,TRINITY_DN58432_c0_g1
BP	GO:0070219	cellular sulfide ion homeostasis	0	3	3	3	0.01308	0.207484	-	TRINITY_DN44362_c0_g1,TRINITY_DN51551_c0_g1,TRINITY_DN58432_c0_g1
BP	GO:0071291	cellular response to selenium ion	2	1	3	3	0.01308	0.207484	TRINITY_DN15963_c0_g1,TRINITY_DN4804_c0_g1	TRINITY_DN23161_c0_g1
BP	GO:0098849	cellular detoxification of cadmium ion	0	3	3	3	0.01308	0.207484	-	TRINITY_DN44362_c0_g1,TRINITY_DN51551_c0_g1,TRINITY_DN58432_c0_g1
BP	GO:1903792	negative regulation of anion transport	3	0	3	3	0.01308	0.207484	TRINITY_DN13151_c0_g1,TRINITY_DN20489_c0_g1,TRINITY_DN4519_c0_g1	-
BP	GO:1903960	negative regulation of anion transmembrane transport	3	0	3	3	0.01308	0.207484	TRINITY_DN13151_c0_g1,TRINITY_DN20489_c0_g1,TRINITY_DN4519_c0_g1	-
BP	GO:0046209	nitric oxide metabolic process	1	8	9	18	0.01309	0.207484	TRINITY_DN8318_c0_g1	TRINITY_DN114002_c0_g1,TRINITY_DN19162_c0_g1,TRINITY_DN23704_c0_g3,TRINITY_DN5687_c0_g1,TRINITY_DN5825_c0_g1,TRINITY_DN602_c0_g1,TRINITY_DN71_c0_g1,TRINITY_DN71_c0_g2
BP	GO:0098661	inorganic anion transmembrane transport	9	15	24	66	0.01312	0.207607	TRINITY_DN10775_c0_g1,TRINITY_DN13229_c0_g1,TRINITY_DN1497_c0_g1,TRINITY_DN16551_c1_g1,TRINITY_DN16716_c0_g1,TRINITY_DN16736_c0_g1,TRINITY_DN4232_c0_g1,TRINITY_DN4315_c0_g1,TRINITY_DN563_c3_g1	TRINITY_DN108718_c0_g1,TRINITY_DN17007_c0_g1,TRINITY_DN178_c1_g1,TRINITY_DN1802_c0_g1,TRINITY_DN21803_c0_g1,TRINITY_DN23042_c0_g1,TRINITY_DN23748_c0_g1,TRINITY_DN25156_c0_g1,TRINITY_DN35402_c0_g1,TRINITY_DN3566_c0_g1,TRINITY_DN41547_c0_g2,TRINITY_DN749_c0_g1,TRINITY_DN7697_c0_g1,TRINITY_DN8960_c0_g1,TRINITY_DN9025_c0_g1
BP	GO:0015672	monovalent inorganic cation transport	41	111	152	549	0.01318	0.207624	TRINITY_DN103517_c0_g1,TRINITY_DN10534_c0_g1,TRINITY_DN11059_c0_g1,TRINITY_DN11382_c0_g1,TRINITY_DN11387_c0_g1,TRINITY_DN11519_c0_g1,TRINITY_DN1179_c0_g2,TRINITY_DN11988_c0_g1,TRINITY_DN120916_c0_g1,TRINITY_DN12970_c0_g1,TRINITY_DN1299_c0_g2,TRINITY_DN13040_c0_g1,TRINITY_DN13151_c0_g1,TRINITY_DN13315_c0_g1,TRINITY_DN13593_c0_g1,TRINITY_DN16551_c1_g1,TRINITY_DN1779_c0_g1,TRINITY_DN20489_c0_g1,TRIN…	TRINITY_DN101214_c0_g1,TRINITY_DN101674_c0_g1,TRINITY_DN10368_c0_g1,TRINITY_DN1038_c0_g1,TRINITY_DN104516_c0_g1,TRINITY_DN104775_c0_g1,TRINITY_DN104909_c0_g1,TRINITY_DN107701_c0_g1,TRINITY_DN11072_c0_g1,TRINITY_DN113365_c0_g1,TRINITY_DN113408_c0_g1,TRINITY_DN11556_c0_g1,TRINITY_DN1169_c0_g1,TRINITY_DN1169_c0_g2,TRINITY_DN117598_c0_g1,TRINITY_DN117742_c0_g1,TRINITY_DN11790_c0_g1,TRINITY_DN11940_c0…
BP	GO:0001906	cell killing	9	4	13	30	0.01321	0.207624	TRINITY_DN103505_c0_g1,TRINITY_DN1108_c0_g1,TRINITY_DN13512_c0_g2,TRINITY_DN14521_c0_g1,TRINITY_DN15536_c0_g1,TRINITY_DN19225_c0_g1,TRINITY_DN21450_c0_g1,TRINITY_DN3246_c0_g1,TRINITY_DN4890_c0_g2	TRINITY_DN1108_c0_g2,TRINITY_DN13512_c0_g1,TRINITY_DN44556_c0_g1,TRINITY_DN83075_c0_g1
BP	GO:0010469	regulation of signaling receptor activity	3	10	13	30	0.01321	0.207624	TRINITY_DN117386_c0_g1,TRINITY_DN16446_c0_g3,TRINITY_DN6430_c0_g1	TRINITY_DN10802_c0_g1,TRINITY_DN113089_c0_g1,TRINITY_DN17270_c0_g1,TRINITY_DN19100_c0_g1,TRINITY_DN6151_c0_g1,TRINITY_DN6275_c0_g3,TRINITY_DN714_c0_g1,TRINITY_DN714_c0_g2,TRINITY_DN8776_c0_g1,TRINITY_DN95023_c0_g1
BP	GO:0031640	killing of cells of other organism	9	4	13	30	0.01321	0.207624	TRINITY_DN103505_c0_g1,TRINITY_DN1108_c0_g1,TRINITY_DN13512_c0_g2,TRINITY_DN14521_c0_g1,TRINITY_DN15536_c0_g1,TRINITY_DN19225_c0_g1,TRINITY_DN21450_c0_g1,TRINITY_DN3246_c0_g1,TRINITY_DN4890_c0_g2	TRINITY_DN1108_c0_g2,TRINITY_DN13512_c0_g1,TRINITY_DN44556_c0_g1,TRINITY_DN83075_c0_g1
MF	GO:0009703	nitrate reductase (NADH) activity	0	4	4	5	0.01336	0.207811	-	TRINITY_DN114002_c0_g1,TRINITY_DN19162_c0_g1,TRINITY_DN5687_c0_g1,TRINITY_DN602_c0_g1
MF	GO:0010177	2-(2'-methylthio)ethylmalate synthase activity	4	0	4	5	0.01336	0.207811	TRINITY_DN11008_c0_g1,TRINITY_DN13132_c0_g1,TRINITY_DN21826_c0_g1,TRINITY_DN6502_c0_g1	-
MF	GO:0046857	oxidoreductase activity, acting on other nitrogenous compounds as donors, with NAD or NADP as acceptor	0	4	4	5	0.01336	0.207811	-	TRINITY_DN114002_c0_g1,TRINITY_DN19162_c0_g1,TRINITY_DN5687_c0_g1,TRINITY_DN602_c0_g1
MF	GO:0050463	nitrate reductase [NAD(P)H] activity	0	4	4	5	0.01336	0.207811	-	TRINITY_DN114002_c0_g1,TRINITY_DN19162_c0_g1,TRINITY_DN5687_c0_g1,TRINITY_DN602_c0_g1
MF	GO:0050464	nitrate reductase (NADPH) activity	0	4	4	5	0.01336	0.207811	-	TRINITY_DN114002_c0_g1,TRINITY_DN19162_c0_g1,TRINITY_DN5687_c0_g1,TRINITY_DN602_c0_g1
MF	GO:0003997	acyl-CoA oxidase activity	4	4	8	15	0.0134	0.207811	TRINITY_DN12999_c0_g2,TRINITY_DN17109_c0_g1,TRINITY_DN4124_c0_g1,TRINITY_DN4124_c0_g2	TRINITY_DN105499_c0_g1,TRINITY_DN114191_c0_g1,TRINITY_DN118052_c0_g1,TRINITY_DN55484_c0_g1
MF	GO:0005179	hormone activity	1	7	8	15	0.0134	0.207811	TRINITY_DN6430_c0_g1	TRINITY_DN10802_c0_g1,TRINITY_DN113089_c0_g1,TRINITY_DN17270_c0_g1,TRINITY_DN6151_c0_g1,TRINITY_DN714_c0_g1,TRINITY_DN714_c0_g2,TRINITY_DN8776_c0_g1
MF	GO:0018685	alkane 1-monooxygenase activity	4	4	8	15	0.0134	0.207811	TRINITY_DN10602_c0_g1,TRINITY_DN11172_c0_g1,TRINITY_DN15_c0_g1,TRINITY_DN24507_c0_g1	TRINITY_DN10886_c0_g1,TRINITY_DN1407_c0_g1,TRINITY_DN15_c0_g2,TRINITY_DN15_c2_g1
MF	GO:0050662	coenzyme binding	66	126	192	695	0.01343	0.207931	TRINITY_DN10000_c0_g2,TRINITY_DN100945_c0_g1,TRINITY_DN101353_c0_g1,TRINITY_DN107962_c0_g1,TRINITY_DN11573_c0_g1,TRINITY_DN121173_c0_g1,TRINITY_DN12303_c0_g1,TRINITY_DN12999_c0_g2,TRINITY_DN13151_c0_g1,TRINITY_DN13471_c0_g1,TRINITY_DN14047_c0_g1,TRINITY_DN1457_c0_g1,TRINITY_DN14664_c0_g1,TRINITY_DN14874_c0_g1,TRINITY_DN15409_c0_g1,TRINITY_DN1570_c0_g2,TRINITY_DN16051_c0_g1,TRINITY_DN16079_c0_g1,T…	TRINITY_DN100700_c0_g1,TRINITY_DN101361_c0_g1,TRINITY_DN104341_c0_g1,TRINITY_DN10437_c0_g1,TRINITY_DN105499_c0_g1,TRINITY_DN107689_c0_g1,TRINITY_DN107841_c0_g1,TRINITY_DN109508_c0_g1,TRINITY_DN11099_c0_g1,TRINITY_DN111266_c0_g1,TRINITY_DN111993_c0_g1,TRINITY_DN112560_c0_g1,TRINITY_DN113810_c0_g1,TRINITY_DN114002_c0_g1,TRINITY_DN114191_c0_g1,TRINITY_DN11577_c0_g1,TRINITY_DN11577_c0_g2,TRINITY_DN11…
BP	GO:0000469	cleavage involved in rRNA processing	0	21	21	56	0.01349	0.207986	-	TRINITY_DN100883_c0_g1,TRINITY_DN112713_c0_g1,TRINITY_DN113861_c0_g1,TRINITY_DN116373_c0_g1,TRINITY_DN116671_c0_g1,TRINITY_DN117275_c0_g1,TRINITY_DN15359_c0_g1,TRINITY_DN15384_c0_g1,TRINITY_DN16023_c0_g1,TRINITY_DN16518_c0_g1,TRINITY_DN23073_c0_g1,TRINITY_DN23073_c0_g2,TRINITY_DN23073_c1_g1,TRINITY_DN24828_c0_g1,TRINITY_DN26415_c0_g1,TRINITY_DN26612_c0_g1,TRINITY_DN29079_c0_g1,TRINITY_DN34864_c0_…
BP	GO:0010161	red light signaling pathway	5	7	12	27	0.01356	0.207986	TRINITY_DN10462_c0_g1,TRINITY_DN14351_c0_g1,TRINITY_DN5557_c0_g1,TRINITY_DN6516_c0_g1,TRINITY_DN8205_c0_g1	TRINITY_DN111059_c0_g1,TRINITY_DN11971_c0_g1,TRINITY_DN19316_c0_g1,TRINITY_DN19996_c0_g3,TRINITY_DN19996_c0_g4,TRINITY_DN44726_c0_g1,TRINITY_DN75965_c0_g1
BP	GO:0005982	starch metabolic process	21	13	34	101	0.01359	0.207986	TRINITY_DN11509_c0_g1,TRINITY_DN11597_c0_g1,TRINITY_DN11701_c0_g1,TRINITY_DN11950_c0_g1,TRINITY_DN12221_c0_g1,TRINITY_DN1339_c0_g1,TRINITY_DN1339_c0_g2,TRINITY_DN13789_c0_g1,TRINITY_DN16748_c0_g1,TRINITY_DN17798_c0_g1,TRINITY_DN2006_c0_g1,TRINITY_DN21012_c0_g1,TRINITY_DN25417_c0_g1,TRINITY_DN2683_c0_g1,TRINITY_DN2773_c0_g1,TRINITY_DN3578_c0_g2,TRINITY_DN3767_c0_g1,TRINITY_DN66676_c0_g1,TRINITY_DN…	TRINITY_DN121430_c0_g1,TRINITY_DN14923_c0_g1,TRINITY_DN1516_c0_g1,TRINITY_DN16077_c0_g1,TRINITY_DN19428_c0_g1,TRINITY_DN22155_c0_g1,TRINITY_DN23820_c0_g1,TRINITY_DN30078_c0_g1,TRINITY_DN31501_c0_g2,TRINITY_DN4554_c3_g1,TRINITY_DN4878_c2_g1,TRINITY_DN56896_c0_g1,TRINITY_DN924_c0_g1
BP	GO:0055065	metal ion homeostasis	20	65	85	290	0.01363	0.207986	TRINITY_DN10918_c0_g1,TRINITY_DN12200_c0_g2,TRINITY_DN13916_c0_g1,TRINITY_DN15097_c0_g1,TRINITY_DN1779_c0_g1,TRINITY_DN2054_c0_g1,TRINITY_DN2125_c0_g2,TRINITY_DN24472_c0_g1,TRINITY_DN24472_c0_g2,TRINITY_DN25048_c0_g1,TRINITY_DN31832_c0_g1,TRINITY_DN40055_c0_g1,TRINITY_DN4918_c0_g1,TRINITY_DN5756_c1_g1,TRINITY_DN605_c0_g1,TRINITY_DN6652_c0_g1,TRINITY_DN7381_c0_g1,TRINITY_DN7588_c0_g1,TRINITY_DN760…	TRINITY_DN100009_c0_g1,TRINITY_DN100489_c0_g1,TRINITY_DN10229_c0_g1,TRINITY_DN103891_c0_g1,TRINITY_DN107924_c0_g1,TRINITY_DN116465_c0_g1,TRINITY_DN123725_c0_g1,TRINITY_DN12785_c0_g1,TRINITY_DN12785_c0_g2,TRINITY_DN1318_c0_g1,TRINITY_DN13225_c0_g1,TRINITY_DN15272_c0_g1,TRINITY_DN16785_c0_g2,TRINITY_DN17484_c0_g1,TRINITY_DN17815_c0_g1,TRINITY_DN18688_c0_g2,TRINITY_DN1879_c0_g1,TRINITY_DN19654_c0_g2…
BP	GO:0035690	cellular response to drug	10	57	67	222	0.0137	0.207986	TRINITY_DN1026_c0_g1,TRINITY_DN10917_c0_g1,TRINITY_DN11050_c0_g1,TRINITY_DN12200_c0_g2,TRINITY_DN13916_c0_g1,TRINITY_DN1742_c0_g1,TRINITY_DN1858_c0_g1,TRINITY_DN5598_c1_g2,TRINITY_DN7489_c0_g1,TRINITY_DN7707_c0_g1	TRINITY_DN104775_c0_g1,TRINITY_DN113263_c0_g1,TRINITY_DN11383_c0_g1,TRINITY_DN11712_c0_g1,TRINITY_DN12766_c0_g1,TRINITY_DN12766_c0_g2,TRINITY_DN13640_c0_g1,TRINITY_DN13994_c0_g1,TRINITY_DN14649_c0_g1,TRINITY_DN15922_c0_g1,TRINITY_DN17795_c0_g1,TRINITY_DN1823_c0_g1,TRINITY_DN18460_c0_g2,TRINITY_DN18728_c0_g1,TRINITY_DN197_c0_g2,TRINITY_DN20031_c0_g1,TRINITY_DN20871_c0_g5,TRINITY_DN21708_c0_g1,TRIN…
BP	GO:0009065	glutamine family amino acid catabolic process	3	8	11	24	0.01372	0.207986	TRINITY_DN10563_c0_g1,TRINITY_DN3381_c0_g1,TRINITY_DN7839_c0_g1	TRINITY_DN16227_c0_g1,TRINITY_DN34410_c0_g1,TRINITY_DN37587_c0_g3,TRINITY_DN51165_c0_g1,TRINITY_DN51165_c0_g2,TRINITY_DN55503_c0_g3,TRINITY_DN6352_c0_g1,TRINITY_DN880_c0_g2
BP	GO:0055081	anion homeostasis	7	21	28	80	0.01373	0.207986	TRINITY_DN10301_c0_g1,TRINITY_DN109967_c0_g1,TRINITY_DN12572_c0_g1,TRINITY_DN1596_c0_g1,TRINITY_DN4034_c0_g1,TRINITY_DN6607_c0_g1,TRINITY_DN6652_c0_g1	TRINITY_DN100489_c0_g1,TRINITY_DN103891_c0_g1,TRINITY_DN104775_c0_g1,TRINITY_DN107924_c0_g1,TRINITY_DN13640_c0_g1,TRINITY_DN17815_c0_g1,TRINITY_DN1802_c0_g1,TRINITY_DN22301_c0_g1,TRINITY_DN2532_c0_g1,TRINITY_DN3444_c0_g1,TRINITY_DN36426_c0_g1,TRINITY_DN4129_c0_g1,TRINITY_DN44147_c0_g1,TRINITY_DN44362_c0_g1,TRINITY_DN4615_c0_g1,TRINITY_DN51551_c0_g1,TRINITY_DN58432_c0_g1,TRINITY_DN5845_c0_g1,TRINI…
MF	GO:0008430	selenium binding	2	1	3	3	0.01379	0.207986	TRINITY_DN15963_c0_g1,TRINITY_DN4804_c0_g1	TRINITY_DN23161_c0_g1
MF	GO:0008861	formate C-acetyltransferase activity	0	3	3	3	0.01379	0.207986	-	TRINITY_DN11270_c0_g1,TRINITY_DN11270_c0_g2,TRINITY_DN11270_c0_g3
MF	GO:0009784	transmembrane receptor histidine kinase activity	1	2	3	3	0.01379	0.207986	TRINITY_DN8607_c0_g1	TRINITY_DN21585_c0_g1,TRINITY_DN71602_c0_g1
MF	GO:0009885	transmembrane histidine kinase cytokinin receptor activity	1	2	3	3	0.01379	0.207986	TRINITY_DN8607_c0_g1	TRINITY_DN21585_c0_g1,TRINITY_DN71602_c0_g1
MF	GO:0016630	protochlorophyllide reductase activity	2	1	3	3	0.01379	0.207986	TRINITY_DN13270_c0_g1,TRINITY_DN14417_c0_g1	TRINITY_DN100343_c0_g1
MF	GO:0050278	sedoheptulose-bisphosphatase activity	1	2	3	3	0.01379	0.207986	TRINITY_DN11701_c0_g1	TRINITY_DN16077_c0_g1,TRINITY_DN30078_c0_g1
MF	GO:0052731	phosphocholine phosphatase activity	2	1	3	3	0.01379	0.207986	TRINITY_DN5655_c0_g1,TRINITY_DN5770_c0_g1	TRINITY_DN20229_c0_g2
MF	GO:0052732	phosphoethanolamine phosphatase activity	2	1	3	3	0.01379	0.207986	TRINITY_DN5655_c0_g1,TRINITY_DN5770_c0_g1	TRINITY_DN20229_c0_g2
MF	GO:0070224	sulfide:quinone oxidoreductase activity	0	3	3	3	0.01379	0.207986	-	TRINITY_DN44362_c0_g1,TRINITY_DN51551_c0_g1,TRINITY_DN58432_c0_g1
BP	GO:0031667	response to nutrient levels	41	88	129	460	0.014	0.210813	TRINITY_DN10019_c0_g1,TRINITY_DN10301_c0_g1,TRINITY_DN110770_c0_g1,TRINITY_DN1113_c0_g3,TRINITY_DN12200_c0_g2,TRINITY_DN130_c0_g2,TRINITY_DN13916_c0_g1,TRINITY_DN15097_c0_g1,TRINITY_DN1532_c0_g1,TRINITY_DN15944_c0_g1,TRINITY_DN16342_c0_g1,TRINITY_DN18143_c0_g1,TRINITY_DN1906_c0_g1,TRINITY_DN23656_c0_g1,TRINITY_DN32951_c0_g1,TRINITY_DN35814_c0_g2,TRINITY_DN3666_c0_g1,TRINITY_DN4098_c0_g1,TRINITY_D…	TRINITY_DN101081_c0_g1,TRINITY_DN10169_c0_g1,TRINITY_DN1038_c0_g1,TRINITY_DN104775_c0_g1,TRINITY_DN10802_c0_g1,TRINITY_DN110319_c0_g1,TRINITY_DN11148_c0_g1,TRINITY_DN112613_c0_g1,TRINITY_DN11383_c0_g1,TRINITY_DN11395_c0_g1,TRINITY_DN11401_c0_g2,TRINITY_DN11604_c0_g3,TRINITY_DN120800_c0_g1,TRINITY_DN120925_c0_g1,TRINITY_DN12259_c0_g1,TRINITY_DN123064_c0_g1,TRINITY_DN12356_c0_g1,TRINITY_DN123668_c0…
BP	GO:0071428	rRNA-containing ribonucleoprotein complex export from nucleus	0	23	23	63	0.01423	0.213931	-	TRINITY_DN100883_c0_g1,TRINITY_DN104016_c0_g1,TRINITY_DN104038_c0_g1,TRINITY_DN108550_c0_g1,TRINITY_DN116671_c0_g1,TRINITY_DN117275_c0_g1,TRINITY_DN16023_c0_g1,TRINITY_DN19180_c0_g1,TRINITY_DN21188_c0_g1,TRINITY_DN23073_c0_g1,TRINITY_DN23073_c0_g2,TRINITY_DN23073_c1_g1,TRINITY_DN24828_c0_g1,TRINITY_DN26415_c0_g1,TRINITY_DN26612_c0_g1,TRINITY_DN29079_c0_g1,TRINITY_DN34864_c0_g1,TRINITY_DN43396_c0_…
MF	GO:0015112	nitrate transmembrane transporter activity	8	7	15	36	0.01433	0.215088	TRINITY_DN11704_c0_g2,TRINITY_DN16551_c1_g1,TRINITY_DN16716_c0_g1,TRINITY_DN1695_c1_g2,TRINITY_DN26223_c0_g1,TRINITY_DN3437_c0_g1,TRINITY_DN563_c3_g1,TRINITY_DN7588_c0_g1	TRINITY_DN12689_c0_g1,TRINITY_DN16898_c0_g1,TRINITY_DN22046_c0_g2,TRINITY_DN289_c0_g1,TRINITY_DN4641_c0_g1,TRINITY_DN6664_c0_g1,TRINITY_DN7697_c0_g1
BP	GO:0009828	plant-type cell wall loosening	2	4	6	10	0.01468	0.219635	TRINITY_DN12294_c0_g1,TRINITY_DN1587_c0_g1	TRINITY_DN4191_c2_g1,TRINITY_DN57091_c0_g1,TRINITY_DN7521_c0_g1,TRINITY_DN78390_c0_g1
BP	GO:0030026	cellular manganese ion homeostasis	1	5	6	10	0.01468	0.219635	TRINITY_DN6652_c0_g1	TRINITY_DN12785_c0_g1,TRINITY_DN12785_c0_g2,TRINITY_DN3091_c0_g1,TRINITY_DN642_c0_g1,TRINITY_DN953_c0_g1
MF	GO:0004564	beta-fructofuranosidase activity	5	4	9	18	0.01471	0.219732	TRINITY_DN11938_c0_g1,TRINITY_DN33998_c0_g1,TRINITY_DN7481_c0_g1,TRINITY_DN7750_c0_g1,TRINITY_DN8562_c0_g1	TRINITY_DN105270_c0_g1,TRINITY_DN13230_c0_g2,TRINITY_DN68926_c0_g1,TRINITY_DN7101_c0_g1
CC	GO:0033178	proton-transporting two-sector ATPase complex, catalytic domain	4	26	30	88	0.01474	0.219776	TRINITY_DN11387_c0_g1,TRINITY_DN4632_c0_g1,TRINITY_DN4978_c0_g1,TRINITY_DN61566_c0_g1	TRINITY_DN104909_c0_g1,TRINITY_DN107701_c0_g1,TRINITY_DN113408_c0_g1,TRINITY_DN121452_c0_g1,TRINITY_DN12336_c0_g1,TRINITY_DN15900_c0_g1,TRINITY_DN15900_c1_g1,TRINITY_DN15991_c0_g1,TRINITY_DN19003_c0_g1,TRINITY_DN20021_c0_g1,TRINITY_DN20876_c0_g1,TRINITY_DN21300_c0_g1,TRINITY_DN22235_c0_g1,TRINITY_DN29539_c0_g1,TRINITY_DN29997_c0_g1,TRINITY_DN29997_c1_g1,TRINITY_DN31550_c0_g1,TRINITY_DN36551_c0_g1…
CC	GO:0009570	chloroplast stroma	127	152	279	1064	0.01476	0.219776	TRINITY_DN10179_c0_g1,TRINITY_DN10361_c0_g1,TRINITY_DN103968_c0_g1,TRINITY_DN10618_c0_g1,TRINITY_DN10828_c0_g1,TRINITY_DN10840_c0_g1,TRINITY_DN10978_c0_g2,TRINITY_DN11080_c1_g1,TRINITY_DN11090_c1_g1,TRINITY_DN112015_c0_g1,TRINITY_DN11424_c0_g1,TRINITY_DN11424_c0_g2,TRINITY_DN11509_c0_g1,TRINITY_DN11519_c0_g1,TRINITY_DN11701_c0_g1,TRINITY_DN11954_c0_g1,TRINITY_DN121857_c0_g1,TRINITY_DN12277_c0_g1,…	TRINITY_DN100955_c0_g1,TRINITY_DN103933_c0_g1,TRINITY_DN10425_c1_g1,TRINITY_DN10616_c0_g2,TRINITY_DN10761_c0_g1,TRINITY_DN10831_c0_g1,TRINITY_DN108337_c0_g1,TRINITY_DN108639_c0_g1,TRINITY_DN10999_c0_g1,TRINITY_DN11038_c0_g1,TRINITY_DN116340_c0_g1,TRINITY_DN1169_c0_g2,TRINITY_DN119195_c0_g1,TRINITY_DN120367_c0_g1,TRINITY_DN12037_c0_g1,TRINITY_DN120761_c0_g1,TRINITY_DN121430_c0_g1,TRINITY_DN12219_c…
CC	GO:0045259	proton-transporting ATP synthase complex	4	22	26	74	0.01482	0.220318	TRINITY_DN11387_c0_g1,TRINITY_DN4632_c0_g1,TRINITY_DN4978_c0_g1,TRINITY_DN61566_c0_g1	TRINITY_DN107701_c0_g1,TRINITY_DN113408_c0_g1,TRINITY_DN12336_c0_g1,TRINITY_DN12676_c0_g1,TRINITY_DN15900_c0_g1,TRINITY_DN15900_c1_g1,TRINITY_DN15991_c0_g1,TRINITY_DN17170_c0_g2,TRINITY_DN18355_c0_g1,TRINITY_DN19003_c0_g1,TRINITY_DN20021_c0_g1,TRINITY_DN20876_c0_g1,TRINITY_DN22235_c0_g1,TRINITY_DN29997_c0_g1,TRINITY_DN29997_c1_g1,TRINITY_DN33962_c0_g2,TRINITY_DN36551_c0_g1,TRINITY_DN41954_c0_g1,T…
BP	GO:0006633	fatty acid biosynthetic process	20	71	91	314	0.01498	0.222342	TRINITY_DN103968_c0_g1,TRINITY_DN104720_c0_g1,TRINITY_DN11355_c0_g1,TRINITY_DN11608_c0_g2,TRINITY_DN117158_c0_g1,TRINITY_DN12200_c0_g2,TRINITY_DN12741_c0_g1,TRINITY_DN12766_c1_g1,TRINITY_DN14532_c0_g1,TRINITY_DN19975_c0_g1,TRINITY_DN20717_c0_g2,TRINITY_DN2284_c0_g1,TRINITY_DN28931_c0_g1,TRINITY_DN31197_c0_g1,TRINITY_DN3289_c0_g1,TRINITY_DN4485_c0_g1,TRINITY_DN635_c0_g1,TRINITY_DN8043_c0_g1,TRINIT…	TRINITY_DN10012_c0_g1,TRINITY_DN10425_c1_g1,TRINITY_DN104775_c0_g1,TRINITY_DN11099_c0_g1,TRINITY_DN112600_c0_g1,TRINITY_DN117087_c0_g1,TRINITY_DN11871_c0_g1,TRINITY_DN12766_c0_g1,TRINITY_DN12766_c0_g2,TRINITY_DN13634_c0_g1,TRINITY_DN13640_c0_g1,TRINITY_DN13967_c0_g1,TRINITY_DN16605_c0_g1,TRINITY_DN16953_c0_g1,TRINITY_DN17917_c0_g1,TRINITY_DN18440_c0_g1,TRINITY_DN18607_c0_g1,TRINITY_DN18652_c0_g1,…
BP	GO:0009056	catabolic process	208	534	742	2948	0.01513	0.22377	TRINITY_DN10074_c0_g1,TRINITY_DN10082_c0_g1,TRINITY_DN100945_c0_g1,TRINITY_DN10320_c0_g1,TRINITY_DN10459_c0_g1,TRINITY_DN105495_c0_g1,TRINITY_DN10549_c0_g1,TRINITY_DN10563_c0_g1,TRINITY_DN107962_c0_g1,TRINITY_DN108313_c0_g1,TRINITY_DN10864_c0_g1,TRINITY_DN108872_c0_g1,TRINITY_DN109104_c0_g1,TRINITY_DN109144_c0_g1,TRINITY_DN10976_c0_g1,TRINITY_DN1104_c0_g4,TRINITY_DN113401_c0_g1,TRINITY_DN11342_c0…	TRINITY_DN100388_c0_g1,TRINITY_DN100468_c0_g1,TRINITY_DN100563_c0_g1,TRINITY_DN100648_c0_g1,TRINITY_DN100951_c0_g1,TRINITY_DN101081_c0_g1,TRINITY_DN10217_c0_g1,TRINITY_DN10294_c3_g1,TRINITY_DN1031_c0_g1,TRINITY_DN103536_c0_g1,TRINITY_DN103565_c0_g1,TRINITY_DN103592_c0_g1,TRINITY_DN103605_c0_g1,TRINITY_DN103925_c0_g1,TRINITY_DN104198_c0_g1,TRINITY_DN104264_c0_g1,TRINITY_DN104775_c0_g1,TRINITY_DN10…
BP	GO:0006733	oxidoreduction coenzyme metabolic process	12	74	86	295	0.01514	0.22377	TRINITY_DN101097_c0_g1,TRINITY_DN11424_c0_g1,TRINITY_DN11424_c0_g2,TRINITY_DN1442_c1_g1,TRINITY_DN15968_c0_g1,TRINITY_DN16711_c0_g1,TRINITY_DN17982_c0_g1,TRINITY_DN18403_c0_g1,TRINITY_DN20713_c0_g1,TRINITY_DN4703_c1_g1,TRINITY_DN480_c0_g2,TRINITY_DN8791_c0_g1	TRINITY_DN100563_c0_g1,TRINITY_DN103933_c0_g1,TRINITY_DN10761_c0_g1,TRINITY_DN107707_c0_g1,TRINITY_DN11577_c0_g1,TRINITY_DN116721_c0_g1,TRINITY_DN116881_c0_g1,TRINITY_DN118773_c0_g1,TRINITY_DN121663_c0_g1,TRINITY_DN13293_c0_g1,TRINITY_DN13783_c0_g2,TRINITY_DN15111_c0_g1,TRINITY_DN15729_c0_g2,TRINITY_DN1637_c0_g1,TRINITY_DN16476_c0_g1,TRINITY_DN17334_c1_g1,TRINITY_DN17650_c0_g1,TRINITY_DN18320_c0_…
CC	GO:0031226	intrinsic component of plasma membrane	45	92	137	496	0.01519	0.22377	TRINITY_DN10775_c0_g1,TRINITY_DN10917_c0_g1,TRINITY_DN10988_c0_g1,TRINITY_DN1113_c0_g3,TRINITY_DN112480_c0_g1,TRINITY_DN11262_c0_g1,TRINITY_DN112685_c0_g1,TRINITY_DN11419_c0_g1,TRINITY_DN11737_c0_g1,TRINITY_DN11997_c0_g1,TRINITY_DN121664_c0_g1,TRINITY_DN12357_c0_g1,TRINITY_DN12664_c0_g1,TRINITY_DN13229_c0_g1,TRINITY_DN1324_c0_g2,TRINITY_DN14540_c0_g1,TRINITY_DN1497_c0_g1,TRINITY_DN1546_c2_g1,TRIN…	TRINITY_DN1038_c0_g1,TRINITY_DN10460_c0_g1,TRINITY_DN108718_c0_g1,TRINITY_DN111970_c0_g1,TRINITY_DN11499_c0_g1,TRINITY_DN116862_c0_g1,TRINITY_DN1169_c0_g1,TRINITY_DN1169_c0_g2,TRINITY_DN117598_c0_g1,TRINITY_DN11790_c0_g1,TRINITY_DN12069_c0_g1,TRINITY_DN12069_c0_g3,TRINITY_DN12187_c0_g1,TRINITY_DN13662_c0_g1,TRINITY_DN14481_c0_g1,TRINITY_DN14495_c0_g1,TRINITY_DN14689_c0_g1,TRINITY_DN15182_c0_g1,TR…
BP	GO:0009260	ribonucleotide biosynthetic process	22	109	131	469	0.01521	0.22377	TRINITY_DN11387_c0_g1,TRINITY_DN11415_c0_g1,TRINITY_DN11424_c0_g1,TRINITY_DN11424_c0_g2,TRINITY_DN12595_c0_g1,TRINITY_DN15968_c0_g1,TRINITY_DN16711_c0_g1,TRINITY_DN16989_c0_g1,TRINITY_DN17872_c0_g1,TRINITY_DN18403_c0_g1,TRINITY_DN20713_c0_g1,TRINITY_DN20717_c0_g2,TRINITY_DN3274_c0_g1,TRINITY_DN3797_c0_g2,TRINITY_DN4133_c0_g1,TRINITY_DN4632_c0_g1,TRINITY_DN480_c0_g2,TRINITY_DN4978_c0_g1,TRINITY_DN…	TRINITY_DN100563_c0_g1,TRINITY_DN10425_c1_g1,TRINITY_DN104775_c0_g1,TRINITY_DN10625_c0_g1,TRINITY_DN10761_c0_g1,TRINITY_DN107701_c0_g1,TRINITY_DN107707_c0_g1,TRINITY_DN109180_c0_g1,TRINITY_DN113408_c0_g1,TRINITY_DN11577_c0_g1,TRINITY_DN116721_c0_g1,TRINITY_DN116881_c0_g1,TRINITY_DN118773_c0_g1,TRINITY_DN12336_c0_g1,TRINITY_DN12676_c0_g1,TRINITY_DN13293_c0_g1,TRINITY_DN13640_c0_g1,TRINITY_DN13783_…
BP	GO:0046390	ribose phosphate biosynthetic process	22	109	131	469	0.01521	0.22377	TRINITY_DN11387_c0_g1,TRINITY_DN11415_c0_g1,TRINITY_DN11424_c0_g1,TRINITY_DN11424_c0_g2,TRINITY_DN12595_c0_g1,TRINITY_DN15968_c0_g1,TRINITY_DN16711_c0_g1,TRINITY_DN16989_c0_g1,TRINITY_DN17872_c0_g1,TRINITY_DN18403_c0_g1,TRINITY_DN20713_c0_g1,TRINITY_DN20717_c0_g2,TRINITY_DN3274_c0_g1,TRINITY_DN3797_c0_g2,TRINITY_DN4133_c0_g1,TRINITY_DN4632_c0_g1,TRINITY_DN480_c0_g2,TRINITY_DN4978_c0_g1,TRINITY_DN…	TRINITY_DN100563_c0_g1,TRINITY_DN10425_c1_g1,TRINITY_DN104775_c0_g1,TRINITY_DN10625_c0_g1,TRINITY_DN10761_c0_g1,TRINITY_DN107701_c0_g1,TRINITY_DN107707_c0_g1,TRINITY_DN109180_c0_g1,TRINITY_DN113408_c0_g1,TRINITY_DN11577_c0_g1,TRINITY_DN116721_c0_g1,TRINITY_DN116881_c0_g1,TRINITY_DN118773_c0_g1,TRINITY_DN12336_c0_g1,TRINITY_DN12676_c0_g1,TRINITY_DN13293_c0_g1,TRINITY_DN13640_c0_g1,TRINITY_DN13783_…
MF	GO:0042625	ATPase-coupled ion transmembrane transporter activity	10	58	68	223	0.01522	0.22377	TRINITY_DN11059_c0_g1,TRINITY_DN112480_c0_g1,TRINITY_DN11387_c0_g1,TRINITY_DN11997_c0_g1,TRINITY_DN1546_c2_g1,TRINITY_DN1578_c0_g1,TRINITY_DN4632_c0_g1,TRINITY_DN4978_c0_g1,TRINITY_DN5756_c1_g1,TRINITY_DN61566_c0_g1	TRINITY_DN101214_c0_g1,TRINITY_DN10368_c0_g1,TRINITY_DN104909_c0_g1,TRINITY_DN107701_c0_g1,TRINITY_DN113408_c0_g1,TRINITY_DN11499_c0_g1,TRINITY_DN117742_c0_g1,TRINITY_DN121452_c0_g1,TRINITY_DN12336_c0_g1,TRINITY_DN15758_c0_g1,TRINITY_DN15900_c0_g1,TRINITY_DN15900_c1_g1,TRINITY_DN15991_c0_g1,TRINITY_DN16785_c0_g2,TRINITY_DN18355_c0_g1,TRINITY_DN18660_c0_g1,TRINITY_DN18660_c0_g2,TRINITY_DN18845_c0_…
MF	GO:0052716	hydroquinone:oxygen oxidoreductase activity	4	8	12	27	0.01559	0.228849	TRINITY_DN26635_c0_g1,TRINITY_DN31702_c0_g1,TRINITY_DN4833_c0_g1,TRINITY_DN77585_c0_g1	TRINITY_DN14117_c0_g1,TRINITY_DN15019_c0_g1,TRINITY_DN15019_c0_g2,TRINITY_DN19812_c0_g1,TRINITY_DN4220_c0_g2,TRINITY_DN8028_c0_g1,TRINITY_DN908_c0_g1,TRINITY_DN9693_c0_g1
BP	GO:0000041	transition metal ion transport	10	34	44	138	0.0157	0.230102	TRINITY_DN10918_c0_g1,TRINITY_DN122658_c0_g1,TRINITY_DN2125_c0_g2,TRINITY_DN23952_c0_g1,TRINITY_DN31832_c0_g1,TRINITY_DN40055_c0_g1,TRINITY_DN5721_c0_g2,TRINITY_DN5756_c1_g1,TRINITY_DN605_c0_g1,TRINITY_DN777_c0_g1	TRINITY_DN10229_c0_g1,TRINITY_DN116465_c0_g1,TRINITY_DN123725_c0_g1,TRINITY_DN12785_c0_g1,TRINITY_DN12785_c0_g2,TRINITY_DN17484_c0_g1,TRINITY_DN18205_c0_g1,TRINITY_DN18660_c0_g2,TRINITY_DN19654_c0_g2,TRINITY_DN20246_c0_g1,TRINITY_DN21708_c0_g1,TRINITY_DN2329_c0_g1,TRINITY_DN3091_c0_g1,TRINITY_DN37_c0_g1,TRINITY_DN401_c0_g2,TRINITY_DN4213_c0_g1,TRINITY_DN4377_c0_g1,TRINITY_DN4377_c0_g2,TRINITY_DN4…
BP	GO:0071478	cellular response to radiation	40	43	83	284	0.01574	0.230327	TRINITY_DN10301_c0_g1,TRINITY_DN103505_c0_g1,TRINITY_DN10462_c0_g1,TRINITY_DN116417_c0_g1,TRINITY_DN12003_c0_g1,TRINITY_DN12408_c0_g1,TRINITY_DN12679_c0_g1,TRINITY_DN13151_c0_g1,TRINITY_DN1339_c0_g1,TRINITY_DN1339_c0_g2,TRINITY_DN13408_c0_g1,TRINITY_DN13408_c0_g2,TRINITY_DN14351_c0_g1,TRINITY_DN16830_c0_g1,TRINITY_DN1709_c1_g1,TRINITY_DN17540_c0_g1,TRINITY_DN19801_c0_g1,TRINITY_DN20489_c0_g1,TRIN…	TRINITY_DN10142_c0_g1,TRINITY_DN101686_c0_g1,TRINITY_DN103938_c0_g1,TRINITY_DN111059_c0_g1,TRINITY_DN112146_c0_g1,TRINITY_DN112785_c0_g1,TRINITY_DN11302_c0_g2,TRINITY_DN114100_c0_g1,TRINITY_DN116291_c0_g1,TRINITY_DN11971_c0_g1,TRINITY_DN121430_c0_g1,TRINITY_DN123023_c0_g1,TRINITY_DN14247_c0_g2,TRINITY_DN17482_c0_g2,TRINITY_DN18903_c0_g1,TRINITY_DN18956_c0_g2,TRINITY_DN19298_c0_g1,TRINITY_DN19316_…
BP	GO:0000272	polysaccharide catabolic process	29	36	65	216	0.01598	0.230384	TRINITY_DN10864_c0_g1,TRINITY_DN109104_c0_g1,TRINITY_DN11509_c0_g1,TRINITY_DN13789_c0_g1,TRINITY_DN13840_c0_g1,TRINITY_DN1442_c0_g1,TRINITY_DN16672_c0_g1,TRINITY_DN16748_c0_g1,TRINITY_DN17280_c0_g1,TRINITY_DN17798_c0_g1,TRINITY_DN18805_c1_g1,TRINITY_DN2006_c0_g1,TRINITY_DN25417_c0_g1,TRINITY_DN2683_c0_g1,TRINITY_DN2971_c0_g1,TRINITY_DN30884_c1_g1,TRINITY_DN32307_c0_g1,TRINITY_DN3246_c0_g1,TRINITY…	TRINITY_DN111998_c0_g1,TRINITY_DN11252_c0_g1,TRINITY_DN114391_c0_g1,TRINITY_DN12806_c0_g1,TRINITY_DN13853_c0_g2,TRINITY_DN13909_c0_g1,TRINITY_DN14495_c0_g1,TRINITY_DN14923_c0_g1,TRINITY_DN1553_c0_g1,TRINITY_DN16252_c0_g1,TRINITY_DN16851_c0_g1,TRINITY_DN1848_c0_g1,TRINITY_DN18920_c0_g5,TRINITY_DN19784_c0_g1,TRINITY_DN20811_c0_g1,TRINITY_DN23820_c0_g1,TRINITY_DN24100_c0_g1,TRINITY_DN24311_c0_g1,TRI…
BP	GO:0072525	pyridine-containing compound biosynthetic process	10	55	65	216	0.01598	0.230384	TRINITY_DN11424_c0_g1,TRINITY_DN11424_c0_g2,TRINITY_DN15968_c0_g1,TRINITY_DN16711_c0_g1,TRINITY_DN18403_c0_g1,TRINITY_DN19959_c0_g1,TRINITY_DN20713_c0_g1,TRINITY_DN480_c0_g2,TRINITY_DN6004_c1_g1,TRINITY_DN8791_c0_g1	TRINITY_DN100563_c0_g1,TRINITY_DN10761_c0_g1,TRINITY_DN107707_c0_g1,TRINITY_DN11577_c0_g1,TRINITY_DN116721_c0_g1,TRINITY_DN116881_c0_g1,TRINITY_DN118773_c0_g1,TRINITY_DN13293_c0_g1,TRINITY_DN13783_c0_g2,TRINITY_DN15111_c0_g1,TRINITY_DN15729_c0_g2,TRINITY_DN1637_c0_g1,TRINITY_DN16476_c0_g1,TRINITY_DN17334_c1_g1,TRINITY_DN17650_c0_g1,TRINITY_DN18919_c0_g1,TRINITY_DN19351_c0_g1,TRINITY_DN21146_c0_g2…
MF	GO:0003844	1,4-alpha-glucan branching enzyme activity	4	2	6	10	0.01604	0.230384	TRINITY_DN1339_c0_g1,TRINITY_DN1339_c0_g2,TRINITY_DN21012_c0_g1,TRINITY_DN88908_c0_g1	TRINITY_DN121430_c0_g1,TRINITY_DN56896_c0_g1
MF	GO:0005242	inward rectifier potassium channel activity	3	3	6	10	0.01604	0.230384	TRINITY_DN33782_c0_g1,TRINITY_DN56287_c0_g2,TRINITY_DN8237_c0_g1	TRINITY_DN19936_c1_g1,TRINITY_DN54860_c0_g1,TRINITY_DN6518_c0_g1
MF	GO:0008131	primary amine oxidase activity	2	4	6	10	0.01604	0.230384	TRINITY_DN112040_c0_g1,TRINITY_DN3905_c1_g1	TRINITY_DN3905_c0_g1,TRINITY_DN3905_c0_g2,TRINITY_DN71_c0_g1,TRINITY_DN71_c0_g2
MF	GO:0010277	chlorophyllide a oxygenase [overall] activity	2	4	6	10	0.01604	0.230384	TRINITY_DN7193_c0_g1,TRINITY_DN76292_c0_g1	TRINITY_DN11526_c0_g1,TRINITY_DN22813_c0_g1,TRINITY_DN22813_c1_g1,TRINITY_DN52202_c0_g1
MF	GO:0016707	gibberellin 3-beta-dioxygenase activity	0	6	6	10	0.01604	0.230384	-	TRINITY_DN10591_c0_g1,TRINITY_DN12328_c0_g1,TRINITY_DN13588_c0_g1,TRINITY_DN21242_c0_g1,TRINITY_DN25231_c0_g1,TRINITY_DN6695_c1_g1
MF	GO:0016892	endoribonuclease activity, producing 3'-phosphomonoesters	2	4	6	10	0.01604	0.230384	TRINITY_DN79375_c0_g1,TRINITY_DN8233_c0_g1	TRINITY_DN16315_c0_g1,TRINITY_DN39363_c0_g2,TRINITY_DN45536_c0_g1,TRINITY_DN85012_c0_g1
MF	GO:0042132	fructose 1,6-bisphosphate 1-phosphatase activity	3	3	6	10	0.01604	0.230384	TRINITY_DN11080_c1_g1,TRINITY_DN11701_c0_g1,TRINITY_DN7965_c0_g1	TRINITY_DN14923_c0_g1,TRINITY_DN16077_c0_g1,TRINITY_DN79665_c0_g1
MF	GO:0050403	trans-zeatin O-beta-D-glucosyltransferase activity	5	1	6	10	0.01604	0.230384	TRINITY_DN13860_c0_g1,TRINITY_DN16726_c0_g1,TRINITY_DN385_c0_g1,TRINITY_DN7495_c0_g1,TRINITY_DN7495_c0_g2	TRINITY_DN111954_c0_g1
MF	GO:0050502	cis-zeatin O-beta-D-glucosyltransferase activity	5	1	6	10	0.01604	0.230384	TRINITY_DN13860_c0_g1,TRINITY_DN16726_c0_g1,TRINITY_DN385_c0_g1,TRINITY_DN7495_c0_g1,TRINITY_DN7495_c0_g2	TRINITY_DN111954_c0_g1
MF	GO:0102752	1,4-alpha-glucan branching enzyme activity (using a glucosylated glycogenin as primer for glycogen synthesis)	4	2	6	10	0.01604	0.230384	TRINITY_DN1339_c0_g1,TRINITY_DN1339_c0_g2,TRINITY_DN21012_c0_g1,TRINITY_DN88908_c0_g1	TRINITY_DN121430_c0_g1,TRINITY_DN56896_c0_g1
BP	GO:0051188	cofactor biosynthetic process	43	130	173	635	0.01612	0.231177	TRINITY_DN10462_c0_g1,TRINITY_DN10866_c0_g1,TRINITY_DN11415_c0_g1,TRINITY_DN11424_c0_g1,TRINITY_DN11424_c0_g2,TRINITY_DN13034_c0_g1,TRINITY_DN13270_c0_g1,TRINITY_DN14351_c0_g1,TRINITY_DN14375_c0_g1,TRINITY_DN14417_c0_g1,TRINITY_DN1570_c0_g2,TRINITY_DN15968_c0_g1,TRINITY_DN16711_c0_g1,TRINITY_DN16733_c0_g2,TRINITY_DN18403_c0_g1,TRINITY_DN19959_c0_g1,TRINITY_DN20713_c0_g1,TRINITY_DN20717_c0_g2,TRIN…	TRINITY_DN100009_c0_g1,TRINITY_DN100343_c0_g1,TRINITY_DN100563_c0_g1,TRINITY_DN101361_c0_g1,TRINITY_DN10425_c1_g1,TRINITY_DN1065_c0_g1,TRINITY_DN10761_c0_g1,TRINITY_DN107707_c0_g1,TRINITY_DN108652_c0_g1,TRINITY_DN109551_c0_g1,TRINITY_DN112146_c0_g1,TRINITY_DN11577_c0_g1,TRINITY_DN116721_c0_g1,TRINITY_DN116881_c0_g1,TRINITY_DN116979_c0_g1,TRINITY_DN1169_c0_g1,TRINITY_DN1169_c0_g2,TRINITY_DN11707_c…
BP	GO:0006006	glucose metabolic process	13	29	42	131	0.01629	0.2329	TRINITY_DN11080_c1_g1,TRINITY_DN11424_c0_g1,TRINITY_DN11424_c0_g2,TRINITY_DN11701_c0_g1,TRINITY_DN15968_c0_g1,TRINITY_DN17982_c0_g1,TRINITY_DN1906_c0_g1,TRINITY_DN357_c0_g1,TRINITY_DN46429_c0_g1,TRINITY_DN6291_c0_g1,TRINITY_DN6904_c0_g2,TRINITY_DN7965_c0_g1,TRINITY_DN9659_c0_g1	TRINITY_DN100563_c0_g1,TRINITY_DN104775_c0_g1,TRINITY_DN11577_c0_g1,TRINITY_DN11577_c0_g2,TRINITY_DN11577_c0_g3,TRINITY_DN11604_c0_g3,TRINITY_DN116721_c0_g1,TRINITY_DN116881_c0_g1,TRINITY_DN118773_c0_g1,TRINITY_DN12356_c0_g1,TRINITY_DN13293_c0_g1,TRINITY_DN13640_c0_g1,TRINITY_DN14923_c0_g1,TRINITY_DN16077_c0_g1,TRINITY_DN16476_c0_g1,TRINITY_DN18919_c0_g1,TRINITY_DN21197_c0_g1,TRINITY_DN22155_c0_g…
[truncated: 8,684 more rows]
