# Supplementary material for: The Developmental Mechanism of the Root System of Cultivated Terrestrial Watercress
Source: Plants (Basel). 2023 Oct 10;12(20):3523. doi: 10.3390/plants12203523 (PMC10610301; doi:10.3390/plants12203523)
Supplement: Supplementary file 1 [file plants-12-03523-s001.zip › Table S3_Annotation.xlsx]

## Sheet: Sheet1
Unigene ID	Length	GO	KEGG	PFAM	eggNOG	eggNOG_Category	Swissprot	NR
TRINITY_DN0_c0_g1	1236	GO:0009987;GO:0030312;GO:0009664;GO:0009505;GO:0071554;GO:0071669;GO:0071840;GO:0016043;GO:0005198;GO:0005576;GO:0008150;GO:0009530;GO:0005618;GO:0071944;GO:0003674;GO:0044464;GO:0045229;GO:0005623;GO:0005575;GO:0071555;GO:0005199	-	PF04554	3HWRS	S	sp|Q9FS16|EXTN3_ARATH Extensin-3 OS=Arabidopsis thaliana OX=3702 GN=EXT3 PE=1 SV=3	NP_173553.1 extensin 3 [Arabidopsis thaliana] &gt;Q9FS16.3 RecName: Full=Extensin-3; Short=AtExt3; Short=AtExt5; AltName: Full=Extensin-3/5; AltName: Full=Protein ROOT-SHOOT-HYPOCOTYL-DEFECTIVE; Flags: Precursor [Arabidopsis thaliana] &gt;AAF81360.1 Contains similarity to Extensin (atExt1) from Arabidopsis thaliana gb|U43627 and contains 12 concatamers of 28 amino acids rich in proline. ESTs gb|A…
TRINITY_DN0_c0_g2	1413	-	-	PF04554	-	-	-	-
TRINITY_DN0_c0_g3	463	-	-	-	-	-	-	-
TRINITY_DN0_c5_g1	423	-	-	-	-	-	-	-
TRINITY_DN0_c5_g2	570	-	-	PF04554	-	-	-	-
TRINITY_DN0_c5_g5	391	-	-	PF04554	-	-	-	-
TRINITY_DN100001_c0_g1	668	GO:0008152;GO:0009987;GO:0008144;GO:0004672;GO:0006468;GO:0016772;GO:0140096;GO:1901363;GO:0006793;GO:0016021;GO:0001871;GO:0032553;GO:0006807;GO:0016740;GO:0005524;GO:0043168;GO:0044237;GO:0016020;GO:0097367;GO:0035639;GO:0036211;GO:0071704;GO:0000166;GO:0006796;GO:0005488;GO:0016301;GO:1901265;GO:0019538;GO:0043170;GO:0043412;GO:0097159;GO:0030247;GO:0044425;GO:0016773;GO:0016310;GO:0044260;GO:…	-	PF14380	3HWZZ	T	sp|Q3ECH2|LRL28_ARATH LEAF RUST 10 DISEASE-RESISTANCE LOCUS RECEPTOR-LIKE PROTEIN KINASE-like 2.8 OS=Arabidopsis thaliana OX=3702 GN=LRK10L-2.8 PE=2 SV=2	CAE5963210.1 unnamed protein product [Arabidopsis arenosa]
TRINITY_DN100003_c0_g1	363	-	-	-	-	-	-	-
TRINITY_DN100004_c0_g1	350	-	-	-	-	-	-	-
TRINITY_DN100009_c0_g1	509	GO:0071840;GO:0044429;GO:0070013;GO:0043170;GO:0019538;GO:0006873;GO:0043227;GO:0016782;GO:0051539;GO:0031974;GO:0005575;GO:0022607;GO:0055082;GO:0005506;GO:0050801;GO:0016226;GO:0044422;GO:0044446;GO:0003824;GO:0051186;GO:0019725;GO:0044238;GO:0043167;GO:0065008;GO:0055076;GO:0005622;GO:0046916;GO:0046872;GO:0046914;GO:0005739;GO:0003674;GO:0031163;GO:1901564;GO:0008150;GO:0043226;GO:0016043;GO:…	-	PF01592	4JP3U	C	sp|Q9D7P6|ISCU_MOUSE Iron-sulfur cluster assembly enzyme ISCU, mitochondrial OS=Mus musculus OX=10090 GN=Iscu PE=1 SV=1	XP_027919987.1 iron-sulfur cluster assembly protein 1 [Vigna unguiculata]
TRINITY_DN10000_c0_g1	1888	-	-	PF01565;PF08031	3HZEF	C	sp|Q9FKU9|BBE25_ARATH Berberine bridge enzyme-like 25 OS=Arabidopsis thaliana OX=3702 GN=At5g44390 PE=2 SV=1	VVB07895.1 unnamed protein product [Arabis nemorensis]
TRINITY_DN10000_c0_g2	1904	GO:1901265;GO:0008152;GO:0055114;GO:0050660;GO:0016491;GO:0005576;GO:0097159;GO:1901363;GO:0036094;GO:0005575;GO:0005618;GO:0043168;GO:0030312;GO:0003824;GO:0043167;GO:0008150;GO:0016614;GO:0048037;GO:0005488;GO:0044464;GO:0005623;GO:0000166;GO:0003674;GO:0071944;GO:0050662	-	PF08031;PF01565	3HZEF	C	sp|Q9FKU9|BBE25_ARATH Berberine bridge enzyme-like 25 OS=Arabidopsis thaliana OX=3702 GN=At5g44390 PE=2 SV=1	XP_013724408.1 berberine bridge enzyme-like 25 [Brassica napus] &gt;CAF2041457.1 unnamed protein product [Brassica napus] &gt;CDY13105.1 BnaA09g17120D [Brassica napus]
TRINITY_DN100010_c0_g1	316	-	-	-	-	-	-	-
TRINITY_DN100012_c0_g1	381	-	-	-	-	-	-	-
TRINITY_DN100014_c0_g1	373	-	-	-	-	-	-	-
TRINITY_DN100015_c0_g1	589	GO:0022414;GO:1901363;GO:0016021;GO:0006793;GO:0006807;GO:0032553;GO:0004672;GO:0006468;GO:0044706;GO:0008152;GO:0009987;GO:0048544;GO:0008144;GO:0140096;GO:0016772;GO:0005516;GO:0036211;GO:0071704;GO:0097367;GO:0035639;GO:0005623;GO:0044464;GO:0006796;GO:0005488;GO:0016301;GO:0071944;GO:0000166;GO:0000003;GO:0005524;GO:0043168;GO:0044237;GO:0009856;GO:0016740;GO:0016020;GO:0016773;GO:0044425;GO:…	-	PF08276	3GXHH	T	sp|Q9SYA0|Y1150_ARATH G-type lectin S-receptor-like serine/threonine-protein kinase At1g61500 OS=Arabidopsis thaliana OX=3702 GN=At1g61500 PE=2 SV=2	XP_020890047.1 LOW QUALITY PROTEIN: G-type lectin S-receptor-like serine/threonine-protein kinase At1g61500 [Arabidopsis lyrata subsp. lyrata]
TRINITY_DN100016_c0_g1	504	-	-	-	-	-	-	-
TRINITY_DN10001_c0_g1	3658	GO:0032559;GO:0006464;GO:0031224;GO:0044238;GO:0043167;GO:0044267;GO:0004674;GO:0003824;GO:0030554;GO:0008150;GO:1901564;GO:0003674;GO:0032555;GO:1901265;GO:0043170;GO:0019538;GO:0005886;GO:0043412;GO:0097159;GO:0016773;GO:0044425;GO:0016310;GO:0044260;GO:0017076;GO:0036094;GO:0005575;GO:0016740;GO:0044237;GO:0043168;GO:0005524;GO:0016020;GO:0035639;GO:0097367;GO:0071704;GO:0036211;GO:0000166;GO:…	-	PF07714;PF13855;PF11721	3HVW7	T	sp|C0LGE0|Y1765_ARATH Probable LRR receptor-like serine/threonine-protein kinase At1g07650 OS=Arabidopsis thaliana OX=3702 GN=At1g07650 PE=1 SV=1	XP_010457957.1 PREDICTED: probable LRR receptor-like serine/threonine-protein kinase At1g07650 [Camelina sativa]
TRINITY_DN100026_c0_g1	2344	GO:0044238;GO:0043167;GO:0003723;GO:0003824;GO:0005622;GO:0046872;GO:0090305;GO:0044237;GO:0043229;GO:0003676;GO:1901360;GO:0003674;GO:0004518;GO:0046914;GO:0043231;GO:0044464;GO:0046483;GO:0005623;GO:0005488;GO:0090304;GO:0043226;GO:0006725;GO:0071704;GO:0008150;GO:0043170;GO:0006139;GO:0016788;GO:0043169;GO:0043412;GO:0044424;GO:0009987;GO:0008152;GO:0043227;GO:0016070;GO:0016787;GO:0006807;GO:…	-	PF01535;PF20431;PF13041;PF14432	3HR4E	S	sp|Q9LW63|PP251_ARATH Putative pentatricopeptide repeat-containing protein At3g23330 OS=Arabidopsis thaliana OX=3702 GN=PCMP-H32 PE=3 SV=1	XP_006297059.1 putative pentatricopeptide repeat-containing protein At3g23330 isoform X1 [Capsella rubella] &gt;EOA29957.1 hypothetical protein CARUB_v10013060mg [Capsella rubella]
TRINITY_DN10002_c0_g1	1805	GO:0044425;GO:0016021;GO:0009941;GO:0022857;GO:0009536;GO:0005737;GO:0005575;GO:0015293;GO:0043227;GO:0006811;GO:0044424;GO:0005886;GO:0022804;GO:0031975;GO:0015291;GO:0006812;GO:0008150;GO:0051179;GO:0044434;GO:0043226;GO:0030001;GO:0051234;GO:0044444;GO:0043231;GO:0044464;GO:0005623;GO:0006810;GO:0009507;GO:0071944;GO:0003674;GO:0044435;GO:0043229;GO:0006814;GO:0031967;GO:0005215;GO:0005622;GO:…	-	PF01758	3HS9Y	P	sp|Q8RXE8|BASS3_ARATH Probable sodium/metabolite cotransporter BASS3, chloroplastic OS=Arabidopsis thaliana OX=3702 GN=BASS3 PE=2 SV=1	OAP03915.1 hypothetical protein AXX17_AT3G27330 [Arabidopsis thaliana]
TRINITY_DN100033_c0_g1	414	-	-	-	-	-	-	-
TRINITY_DN10003_c0_g1	2154	-	-	-	-	-	-	-
TRINITY_DN100047_c0_g1	328	-	-	-	-	-	-	-
TRINITY_DN10004_c0_g1	1921	GO:0003674;GO:0016620;GO:0005737;GO:0005575;GO:0044464;GO:0005623;GO:0016491;GO:0008150;GO:0055114;GO:0008886;GO:0003824;GO:0044424;GO:0005622;GO:0008152;GO:0016903	K00131	PF00171	3HNF0	C	sp|Q1WIQ6|GAPN_ARATH NADP-dependent glyceraldehyde-3-phosphate dehydrogenase OS=Arabidopsis thaliana OX=3702 GN=ALDH11A3 PE=1 SV=2	NP_001318281.1 aldehyde dehydrogenase 11A3 [Arabidopsis thaliana] &gt;AEC07552.2 aldehyde dehydrogenase 11A3 [Arabidopsis thaliana]
TRINITY_DN100053_c0_g1	303	GO:0019538;GO:0043170;GO:0015934;GO:0044249;GO:0022625;GO:0043604;GO:0005575;GO:0005840;GO:0044260;GO:1990904;GO:0097159;GO:0043043;GO:0009058;GO:0044446;GO:0044422;GO:0032991;GO:0043167;GO:0044267;GO:1901566;GO:0044391;GO:0044238;GO:0003676;GO:0034645;GO:0046872;GO:0005622;GO:0005829;GO:0009059;GO:0003674;GO:1901576;GO:1901564;GO:0008150;GO:0043603;GO:0044444;GO:0043226;GO:0043232;GO:0044271;GO:…	-	-	3GJG2	J	-	-
TRINITY_DN100055_c0_g2	344	-	-	-	-	-	-	-
TRINITY_DN10005_c0_g1	1434	-	-	PF00335	3HYFU	S	sp|F4I214|TET10_ARATH Tetraspanin-10 OS=Arabidopsis thaliana OX=3702 GN=TET10 PE=2 SV=1	XP_002886406.2 tetraspanin-10 [Arabidopsis lyrata subsp. lyrata] &gt;XP_002886413.2 tetraspanin-10 [Arabidopsis lyrata subsp. lyrata] &gt;XP_002886416.1 tetraspanin-10 [Arabidopsis lyrata subsp. lyrata] &gt;OAP18541.1 TET10 [Arabidopsis thaliana] &gt;EFH62675.1 hypothetical protein ARALYDRAFT_893123 [Arabidopsis lyrata subsp. lyrata] &gt;CAD5316158.1 unnamed protein product [Arabidopsis thaliana]
TRINITY_DN100060_c0_g1	336	-	-	-	-	-	-	-
TRINITY_DN100065_c0_g1	483	-	-	-	-	-	-	-
TRINITY_DN100068_c0_g1	367	GO:0043231;GO:0044464;GO:0016705;GO:0005488;GO:0005623;GO:0000166;GO:0003674;GO:0050662;GO:0008150;GO:0043226;GO:0048037;GO:0044444;GO:0003824;GO:0031224;GO:0016020;GO:0043167;GO:0012505;GO:0043229;GO:0043168;GO:0005622;GO:0016709;GO:0005737;GO:0036094;GO:0005575;GO:0004497;GO:0016491;GO:0044425;GO:0004506;GO:0016021;GO:0005783;GO:0097159;GO:1901363;GO:0055114;GO:0050660;GO:0043227;GO:1901265;GO:…	K00511	-	3HY7P	I	sp|O65404|ERG11_ARATH Squalene epoxidase 5 OS=Arabidopsis thaliana OX=3702 GN=SQE5 PE=2 SV=2	XP_002874174.1 squalene epoxidase 6 [Arabidopsis lyrata subsp. lyrata] &gt;EFH50433.1 predicted protein [Arabidopsis lyrata subsp. lyrata]
TRINITY_DN100073_c0_g1	495	-	-	-	3GFHA	S	-	-
TRINITY_DN100076_c0_g1	374	-	-	-	-	-	-	-
TRINITY_DN10007_c0_g1	1378	GO:0098772;GO:0050789;GO:0071695;GO:0010431;GO:0043170;GO:1901420;GO:0019538;GO:0048523;GO:2000033;GO:0048608;GO:0005575;GO:0010033;GO:0050793;GO:0009788;GO:0023051;GO:1901700;GO:0044092;GO:0010154;GO:0006470;GO:1901701;GO:0044267;GO:0043167;GO:0019212;GO:0050794;GO:0004722;GO:0080050;GO:0005634;GO:0071495;GO:0050790;GO:0048582;GO:0051094;GO:0003674;GO:0009791;GO:2000034;GO:0048609;GO:0007154;GO:…	-	-	3GBQP	T	sp|Q9T010|P2C54_ARATH Probable protein phosphatase 2C 54 OS=Arabidopsis thaliana OX=3702 GN=At4g11040 PE=2 SV=1	XP_002872544.1 probable protein phosphatase 2C 54 [Arabidopsis lyrata subsp. lyrata] &gt;EFH48803.1 hypothetical protein ARALYDRAFT_352174 [Arabidopsis lyrata subsp. lyrata]
TRINITY_DN100089_c0_g1	366	-	-	-	-	-	-	-
TRINITY_DN10008_c0_g1	1163	GO:0043229;GO:0005622;GO:0045703;GO:0044422;GO:0044446;GO:0003824;GO:0031224;GO:0016020;GO:0012505;GO:0005789;GO:0008150;GO:0043226;GO:0016614;GO:0044444;GO:0005739;GO:0043231;GO:0005623;GO:0044464;GO:0003674;GO:0043227;GO:0044424;GO:0008152;GO:0055114;GO:0042175;GO:0098827;GO:0016491;GO:0044425;GO:0031984;GO:0005783;GO:0016021;GO:0005737;GO:0044432;GO:0005575	K10251	PF00106	3HNVG	Q	sp|Q9FYL6|KCR2_ARATH Very-long-chain 3-oxoacyl-CoA reductase-like protein At1g24470 OS=Arabidopsis thaliana OX=3702 GN=KCR2 PE=2 SV=1	XP_010478015.1 PREDICTED: very-long-chain 3-oxoacyl-CoA reductase-like protein At1g24470 [Camelina sativa]
TRINITY_DN100090_c0_g1	366	-	-	-	34NPG	S	-	-
TRINITY_DN100091_c0_g1	313	-	-	-	-	-	-	-
TRINITY_DN100098_c0_g1	348	-	-	-	-	-	-	-
TRINITY_DN10009_c0_g1	4924	GO:0033036;GO:0006403;GO:0010467;GO:0031975;GO:0031090;GO:0050896;GO:0071427;GO:0046907;GO:0009725;GO:0044424;GO:0015031;GO:0042221;GO:0008152;GO:0009409;GO:0051641;GO:0050657;GO:0051028;GO:0015833;GO:0070727;GO:0031965;GO:0009733;GO:0008104;GO:0042886;GO:0006886;GO:0009719;GO:0005635;GO:0016020;GO:0043229;GO:0006406;GO:0043231;GO:0006950;GO:0044464;GO:0005623;GO:0006913;GO:0071704;GO:0071426;GO:…	K14303	PF17238;PF11715	3HQN4	UY	sp|Q9C811|NU160_ARATH Nuclear pore complex protein NUP160 OS=Arabidopsis thaliana OX=3702 GN=NUP160 PE=1 SV=2	XP_020869940.1 nuclear pore complex protein NUP160 [Arabidopsis lyrata subsp. lyrata]
TRINITY_DN10009_c1_g1	571	-	-	-	-	-	-	-
TRINITY_DN1000_c0_g1	1960	GO:0043228;GO:0044463;GO:0099568;GO:0044424;GO:0009987;GO:0120036;GO:0007017;GO:0030030;GO:0005737;GO:0005929;GO:0000226;GO:0097224;GO:0036126;GO:0007010;GO:0006996;GO:1904158;GO:0030031;GO:0043229;GO:0097223;GO:0120031;GO:0005623;GO:0005488;GO:0044464;GO:0031514;GO:0120025;GO:0032838;GO:0044085;GO:0035082;GO:0005930;GO:0005856;GO:0071840;GO:0001578;GO:0005515;GO:0097729;GO:0097014;GO:0060271;GO:…	K09510	PF01556	3HPDH	O	sp|P59910|DJB13_HUMAN DnaJ homolog subfamily B member 13 OS=Homo sapiens OX=9606 GN=DNAJB13 PE=1 SV=1	KAF3528735.1 hypothetical protein DY000_02037188 [Brassica cretica]
TRINITY_DN100101_c0_g1	1108	GO:0006807;GO:0006388;GO:1901363;GO:0016021;GO:0034641;GO:0004519;GO:0006396;GO:0090502;GO:0000213;GO:0006139;GO:0010467;GO:0008152;GO:0009987;GO:0044424;GO:0004540;GO:0016787;GO:0016070;GO:0004518;GO:0140101;GO:1902555;GO:0000214;GO:1901360;GO:0005488;GO:0044464;GO:0005623;GO:0006397;GO:0000394;GO:0043231;GO:0016071;GO:0016894;GO:0090304;GO:0071704;GO:0016020;GO:0008380;GO:0044237;GO:0043229;GO:…	K15322	PF01974;PF02778	3HPD0	J	sp|Q9LSS3|SEN22_ARATH tRNA-splicing endonuclease subunit Sen2-2 OS=Arabidopsis thaliana OX=3702 GN=SEN2 PE=2 SV=1	NP_974966.1 splicing endonuclease 2 [Arabidopsis thaliana] &gt;AED97297.1 splicing endonuclease 2 [Arabidopsis thaliana]
TRINITY_DN100104_c0_g1	401	-	-	-	-	-	-	-
TRINITY_DN100107_c0_g1	401	GO:0005575;GO:0031974;GO:0005618;GO:0005773;GO:0045454;GO:0050789;GO:0005886;GO:0070013;GO:0005788;GO:0043227;GO:0005794;GO:0003674;GO:0008150;GO:0044444;GO:0043226;GO:0003824;GO:0044446;GO:0044422;GO:0012505;GO:0006457;GO:0019725;GO:0050794;GO:0033554;GO:0065008;GO:0030312;GO:0005622;GO:0003756;GO:0044432;GO:0016860;GO:0005737;GO:0016853;GO:0005783;GO:0140096;GO:0050896;GO:0009505;GO:0016864;GO:…	-	-	3HQPA	O	-	-
TRINITY_DN100108_c0_g1	360	GO:0044424;GO:0005622;GO:0005737;GO:0005575;GO:0044464;GO:0005623	-	PF00838	3I238	DZ	sp|Q4PF30|TCTP_USTMA Translationally-controlled tumor protein homolog OS=Ustilago maydis (strain 521 / FGSC 9021) OX=237631 GN=UMAG_12131 PE=3 SV=2	XP_023871922.1 translationally-controlled tumor protein homolog [Quercus suber]
TRINITY_DN10010_c0_g1	1261	GO:0044422;GO:0044446;GO:0019866;GO:0031224;GO:0044238;GO:0043167;GO:0044267;GO:0031967;GO:0005622;GO:0006464;GO:0046872;GO:0005739;GO:0018063;GO:0003674;GO:1901564;GO:0008150;GO:0043226;GO:0016043;GO:0044444;GO:0005886;GO:0043412;GO:0071840;GO:0070013;GO:0044429;GO:0043170;GO:0019538;GO:0043227;GO:0031970;GO:0031974;GO:0005575;GO:0022607;GO:0044260;GO:0044425;GO:0097159;GO:0031966;GO:0043233;GO:…	-	PF03100	3HMCF	O	sp|Q96326|CCME_ARATH Cytochrome c-type biogenesis protein CcmE homolog, mitochondrial OS=Arabidopsis thaliana OX=3702 GN=CCME PE=1 SV=1	CAA7019277.1 unnamed protein product [Microthlaspi erraticum]
TRINITY_DN100116_c0_g1	450	-	-	-	-	-	-	-
TRINITY_DN100117_c0_g1	492	GO:0005884;GO:0009932;GO:0005618;GO:0099513;GO:0005773;GO:0022607;GO:0005575;GO:0048589;GO:0005515;GO:0043227;GO:0040007;GO:0097435;GO:0071840;GO:0009846;GO:0044444;GO:0000904;GO:0043226;GO:0043232;GO:0048588;GO:0016043;GO:0008092;GO:0051639;GO:0008150;GO:0032501;GO:0003674;GO:0003779;GO:0005829;GO:0046872;GO:0005622;GO:0030312;GO:0048856;GO:0048511;GO:0051704;GO:0051017;GO:0007015;GO:0032989;GO:…	K17275	-	3HZNH	Z	sp|Q550R2|CTXB_DICDI Cortexillin-2 OS=Dictyostelium discoideum OX=44689 GN=ctxB PE=1 SV=1	XP_030511837.1 alpha-actinin-like [Rhodamnia argentea]
TRINITY_DN10011_c0_g1	304	GO:0016740;GO:0006629;GO:0044237;GO:0043168;GO:0005524;GO:0006643;GO:0035639;GO:0097367;GO:0071704;GO:0044255;GO:0000166;GO:0046467;GO:0016301;GO:0006796;GO:0003951;GO:0005488;GO:0008144;GO:0009987;GO:0008152;GO:0008610;GO:0006665;GO:0030148;GO:0016772;GO:0006793;GO:1901363;GO:0032553;GO:0006807;GO:0032559;GO:0017050;GO:0044238;GO:0043167;GO:1901566;GO:0003824;GO:0030554;GO:0008150;GO:1901564;GO:…	-	-	3HRIN	IT	sp|Q9LRB0|LCBK1_ARATH Sphingoid long-chain bases kinase 1 OS=Arabidopsis thaliana OX=3702 GN=LCBK1 PE=1 SV=1	KAF2597908.1 hypothetical protein F2Q68_00012398 [Brassica cretica]
TRINITY_DN100123_c0_g1	305	GO:0042623;GO:0017076;GO:0000725;GO:0044260;GO:0022607;GO:0003677;GO:0071840;GO:0043227;GO:0032555;GO:0003697;GO:0008150;GO:0030554;GO:0016887;GO:0006259;GO:0044444;GO:0006725;GO:0043226;GO:0003824;GO:0016818;GO:0044238;GO:0003676;GO:0000730;GO:0033554;GO:0005622;GO:0006807;GO:0008094;GO:0032553;GO:1901363;GO:0000217;GO:0000400;GO:0000724;GO:0050896;GO:0016787;GO:0009987;GO:0044424;GO:0006950;GO:…	-	-	3HMHH	L	-	-
TRINITY_DN100125_c0_g1	454	-	-	-	-	-	-	-
TRINITY_DN100129_c0_g1	345	-	K02155	-	KOG0232	C	sp|Q43362|VATL_CHRCT V-type proton ATPase 16 kDa proteolipid subunit OS=Chrysotila carterae OX=13221 GN=VAP PE=2 SV=1	KAA6426472.1 vacuolar ATP synthase 16 kDa proteolipid subunit [Trebouxia sp. A1-2]
TRINITY_DN10012_c0_g1	2133	GO:0044249;GO:0043227;GO:0042175;GO:0071840;GO:1901362;GO:0019752;GO:0097159;GO:0009058;GO:0019438;GO:0098827;GO:0006082;GO:0044425;GO:0009699;GO:0005506;GO:0004497;GO:0005575;GO:0046872;GO:0000038;GO:0005622;GO:0046394;GO:0005789;GO:0043167;GO:0012505;GO:0031224;GO:0044238;GO:0044446;GO:0003824;GO:0044422;GO:0044444;GO:0010345;GO:0043226;GO:0006725;GO:0016043;GO:0008150;GO:0003674;GO:1901576;GO:…	K15402	PF00067	3HRPE	Q	sp|Q9FMY1|C86B1_ARATH Cytochrome P450 86B1 OS=Arabidopsis thaliana OX=3702 GN=CYP86B1 PE=2 SV=1	VYS67661.1 unnamed protein product [Arabidopsis thaliana]
TRINITY_DN10012_c1_g1	428	-	-	-	-	-	-	-
TRINITY_DN100132_c0_g1	385	-	K01535	PF00702	34JNJ	P	sp|P11718|ATXA_LEIDO Probable proton ATPase 1A OS=Leishmania donovani OX=5661 GN=H1A PE=2 SV=2	KAF6256632.1 plasma membrane hydrogen ATPase [Scenedesmus sp. NREL 46B-D3]
TRINITY_DN100135_c0_g1	543	-	K11252	PF00125	34M19	B	sp|Q96A08|H2B1A_HUMAN Histone H2B type 1-A OS=Homo sapiens OX=9606 GN=H2BC1 PE=1 SV=3	EMS53674.1 Histone H2B.2 [Triticum urartu]
TRINITY_DN100136_c0_g1	582	GO:0030554;GO:0051179;GO:0008150;GO:0043226;GO:0051234;GO:0044444;GO:0032555;GO:0006810;GO:0003674;GO:0071705;GO:0032559;GO:0005622;GO:0046872;GO:0030054;GO:0003824;GO:0043167;GO:0012505;GO:0097159;GO:0036094;GO:0017076;GO:0005575;GO:0071702;GO:0005773;GO:1901265;GO:0043227;GO:0045184;GO:0005794;GO:0009506;GO:0005886;GO:0005911;GO:0016192;GO:0097367;GO:0035639;GO:0043231;GO:0005623;GO:0005488;GO:…	K06027	-	3KNHT	O	-	XP_031117559.1 vesicle-fusing ATPase-like [Ipomoea triloba]
TRINITY_DN100144_c0_g1	356	-	-	-	-	-	-	-
TRINITY_DN10014_c0_g1	1834	GO:0008152;GO:0003674;GO:0008150;GO:0003824;GO:0055114;GO:0016491	-	PF01408;PF02894	3HT4H	GQ	sp|B5F3F4|IOLG_SALA4 Inositol 2-dehydrogenase OS=Salmonella agona (strain SL483) OX=454166 GN=iolG PE=3 SV=1	CAD5328218.1 unnamed protein product [Arabidopsis thaliana]
TRINITY_DN100150_c0_g1	309	-	-	-	-	-	-	-
TRINITY_DN100159_c0_g1	416	-	-	-	-	-	-	-
TRINITY_DN10015_c0_g1	1232	GO:0006399;GO:0008033;GO:0005575;GO:0042780;GO:0090501;GO:0034470;GO:0043227;GO:0043628;GO:0042779;GO:0034414;GO:0004521;GO:0031123;GO:0043170;GO:0016788;GO:0140098;GO:0008150;GO:0006725;GO:0043226;GO:0046483;GO:0005634;GO:0003674;GO:0090305;GO:0034660;GO:0042781;GO:0046872;GO:0005622;GO:0003824;GO:0043167;GO:0044238;GO:0004519;GO:1905267;GO:0034641;GO:0006807;GO:0005737;GO:0016891;GO:0004540;GO:…	K00784	-	3HRKD	S	sp|Q8LGU7|RNZ1_ARATH tRNase Z TRZ1 OS=Arabidopsis thaliana OX=3702 GN=TRZ1 PE=1 SV=3	XP_002887553.1 tRNase Z TRZ1 [Arabidopsis lyrata subsp. lyrata] &gt;EFH63812.1 hypothetical protein ARALYDRAFT_476606 [Arabidopsis lyrata subsp. lyrata]
TRINITY_DN100161_c0_g1	423	-	K00823	-	KOG1404	E	sp|Q8R7C1|ARGD_CALS4 Acetylornithine aminotransferase OS=Caldanaerobacter subterraneus subsp. tengcongensis (strain DSM 15242 / JCM 11007 / NBRC 100824 / MB4) OX=273068 GN=argD PE=3 SV=1	KAF8061932.1 davT [Scenedesmus sp. PABB004]
TRINITY_DN100168_c0_g2	312	GO:0071704;GO:0004197;GO:1901575;GO:0043231;GO:0044464;GO:0005623;GO:0043229;GO:0044237;GO:0044421;GO:0008233;GO:1901565;GO:0009056;GO:0044265;GO:0005576;GO:0008234;GO:0030163;GO:0051603;GO:0005737;GO:0009057;GO:0006807;GO:0016787;GO:0044424;GO:0009987;GO:0008152;GO:0140096;GO:0000323;GO:0008150;GO:1901564;GO:0043226;GO:0044444;GO:0003674;GO:0005764;GO:0005622;GO:0004175;GO:0003824;GO:0044238;GO:…	-	PF00112	3GAD6	O	sp|P14658|CYSP_TRYBB Cysteine proteinase OS=Trypanosoma brucei brucei OX=5702 PE=1 SV=1	XP_025616357.1 ervatamin-B-like [Arachis hypogaea] &gt;QHO31481.1 Senescence-specific cysteine protease [Arachis hypogaea]
TRINITY_DN10016_c0_g1	1574	GO:0044444;GO:0044434;GO:0043226;GO:0009507;GO:0005575;GO:0044464;GO:0005623;GO:0043231;GO:0005737;GO:0009536;GO:0009941;GO:0044424;GO:0005622;GO:0031967;GO:0043229;GO:0044435;GO:0043227;GO:0031975;GO:0044446;GO:0009526;GO:0044422	-	PF03478	3HTYR	S	sp|Q8GXB1|U548_ARATH UPF0548 protein At2g17695 OS=Arabidopsis thaliana OX=3702 GN=At2g17695 PE=2 SV=1	CAE5986961.1 unnamed protein product [Arabidopsis arenosa]
TRINITY_DN100171_c0_g1	431	-	-	-	-	-	-	-
TRINITY_DN100173_c0_g2	344	-	-	-	3IDZP	K	sp|Q9XEC3|WRK42_ARATH WRKY transcription factor 42 OS=Arabidopsis thaliana OX=3702 GN=WRKY42 PE=1 SV=1	KDO78307.1 hypothetical protein CISIN_1g007099mg [Citrus sinensis]
TRINITY_DN100176_c0_g1	322	-	-	-	-	-	-	-
TRINITY_DN100181_c0_g1	347	GO:0016020;GO:0031224;GO:0005215;GO:0055085;GO:0022857;GO:0005575;GO:0006810;GO:0003674;GO:0044425;GO:0051179;GO:0008150;GO:0016021;GO:0051234	K14611	-	3HXKF	F	sp|P93039|NAT4_ARATH Nucleobase-ascorbate transporter 4 OS=Arabidopsis thaliana OX=3702 GN=NAT4 PE=2 SV=2	CAA7048338.1 unnamed protein product [Microthlaspi erraticum]
TRINITY_DN100186_c0_g1	342	-	-	-	3HTCK	B	-	-
TRINITY_DN10018_c0_g1	499	GO:0080090;GO:0030234;GO:0051234;GO:0044444;GO:0051649;GO:0008150;GO:1901564;GO:0044238;GO:0031323;GO:1902494;GO:0005622;GO:0006464;GO:0032270;GO:0071702;GO:0044260;GO:0043087;GO:0051336;GO:1990234;GO:0019222;GO:0005092;GO:0065009;GO:0010604;GO:0018344;GO:0043412;GO:0045184;GO:0005515;GO:0034613;GO:2000112;GO:0044093;GO:0051716;GO:0065007;GO:0006886;GO:2000539;GO:0005096;GO:0044237;GO:0015833;GO:…	-	-	3HTKB	TU	sp|Q8LLD4|REP_ARATH Rab escort protein 1 OS=Arabidopsis thaliana OX=3702 GN=REP PE=1 SV=2	XP_009147152.2 rab escort protein 1 [Brassica rapa]
TRINITY_DN100198_c0_g1	360	GO:0000478;GO:0042254;GO:1901360;GO:0007049;GO:0000472;GO:0006364;GO:0003723;GO:0000447;GO:0005730;GO:0030684;GO:0044237;GO:0043229;GO:0006996;GO:0006807;GO:0000479;GO:1901363;GO:0005654;GO:0030515;GO:0090502;GO:0006396;GO:0043228;GO:0000480;GO:0007275;GO:0007399;GO:0009987;GO:0044424;GO:0008150;GO:0032501;GO:0048513;GO:0016072;GO:0043226;GO:0006725;GO:0043232;GO:0044238;GO:0003676;GO:0034660;GO:…	K14767	-	KOG3118	S	-	CAE6047627.1 unnamed protein product [Arabidopsis arenosa]
TRINITY_DN100199_c0_g1	399	-	-	-	-	-	-	-
TRINITY_DN10019_c0_g1	839	GO:0019222;GO:0032504;GO:0009058;GO:0031669;GO:0003677;GO:0009607;GO:0034654;GO:0006355;GO:0055082;GO:0044260;GO:0046982;GO:0043227;GO:0044249;GO:0048731;GO:0042594;GO:0005515;GO:1903506;GO:0010628;GO:0051707;GO:0010604;GO:0009908;GO:0071310;GO:0032501;GO:0008150;GO:0048653;GO:0043226;GO:0006725;GO:0051252;GO:0042593;GO:0009059;GO:0071326;GO:0048438;GO:0031668;GO:0010182;GO:0080090;GO:1901576;GO:…	-	PF07716	3HUZY	K	sp|Q9FGX2|BZIP1_ARATH Basic leucine zipper 1 OS=Arabidopsis thaliana OX=3702 GN=BZIP1 PE=1 SV=1	CAE6230716.1 unnamed protein product [Arabidopsis arenosa]
TRINITY_DN1001_c0_g1	1660	GO:0030054;GO:0009887;GO:0045199;GO:0050794;GO:0030011;GO:0007163;GO:0005622;GO:0048856;GO:0071705;GO:0006810;GO:0035239;GO:0009555;GO:0034329;GO:0051179;GO:0008150;GO:0051128;GO:0032501;GO:0048513;GO:0051234;GO:0007154;GO:0016043;GO:0098590;GO:0005886;GO:0071840;GO:0050789;GO:0009790;GO:0016323;GO:0051493;GO:0048557;GO:0007043;GO:0045184;GO:0048731;GO:0005575;GO:0048229;GO:0071702;GO:0022607;GO:…	-	PF13855	3GFH0	S	sp|Q8VYG9|PIRL9_ARATH Plant intracellular Ras-group-related LRR protein 9 OS=Arabidopsis thaliana OX=3702 GN=PIRL9 PE=2 SV=1	XP_006296704.1 plant intracellular Ras-group-related LRR protein 9 [Capsella rubella] &gt;EOA29602.1 hypothetical protein CARUB_v10013520mg [Capsella rubella]
TRINITY_DN100205_c0_g1	309	-	-	-	-	-	-	-
TRINITY_DN100206_c0_g1	393	GO:0003824;GO:0044238;GO:0005622;GO:0046872;GO:0006464;GO:0032555;GO:0071396;GO:0030554;GO:0008150;GO:1901564;GO:0043226;GO:0043412;GO:0005886;GO:0071310;GO:0043227;GO:0009738;GO:0005515;GO:0017076;GO:0044260;GO:0097306;GO:0016773;GO:0016310;GO:0046777;GO:0051716;GO:0018105;GO:0065007;GO:0044237;GO:0010857;GO:0043229;GO:0016740;GO:0001101;GO:0016301;GO:0000166;GO:0097367;GO:0035639;GO:0140096;GO:…	K13412	-	3HYX5	T	sp|Q42438|CDPK8_ARATH Calcium-dependent protein kinase 8 OS=Arabidopsis thaliana OX=3702 GN=CPK8 PE=1 SV=1	XP_006287466.1 calcium-dependent protein kinase 8 [Capsella rubella] &gt;EOA20364.1 hypothetical protein CARUB_v10000678mg [Capsella rubella]
TRINITY_DN100206_c0_g2	381	GO:0004674;GO:1901701;GO:0044267;GO:0043167;GO:0032559;GO:0050794;GO:0003674;GO:0005634;GO:0071495;GO:0007154;GO:0043170;GO:0019538;GO:0050789;GO:1901265;GO:0010033;GO:0036094;GO:0005575;GO:1901700;GO:0097159;GO:0016020;GO:0009719;GO:0018193;GO:0035556;GO:0018209;GO:0005524;GO:0043168;GO:0071944;GO:0043231;GO:0005488;GO:0005623;GO:0044464;GO:0006796;GO:0033993;GO:0071704;GO:0036211;GO:0071215;GO:…	K13412	-	3HYX5	T	sp|Q38873|CDPK7_ARATH Calcium-dependent protein kinase 7 OS=Arabidopsis thaliana OX=3702 GN=CPK7 PE=2 SV=1	PON91718.1 Serine/threonine protein kinase [Trema orientale]
TRINITY_DN100207_c0_g1	313	-	-	-	34PDA	UY	-	KAF8069517.1 IPO13 [Scenedesmus sp. PABB004]
TRINITY_DN100208_c0_g1	619	GO:0005737;GO:0005623;GO:0005575;GO:0044464;GO:0044424;GO:0005622	K13993	PF00011	37U9A	O	sp|Q9LNW0|HS178_ARATH 17.8 kDa class I heat shock protein OS=Arabidopsis thaliana OX=3702 GN=HSP17.8 PE=1 SV=1	XP_018839694.1 22.0 kDa class IV heat shock protein-like [Juglans regia] &gt;KAF5457030.1 hypothetical protein F2P56_021168 [Juglans regia]
TRINITY_DN10020_c0_g1	2785	GO:0006812;GO:0016049;GO:0031090;GO:0098655;GO:0009987;GO:0044424;GO:0000902;GO:0005737;GO:0022857;GO:0071805;GO:0016021;GO:0034220;GO:0048869;GO:0098662;GO:0060560;GO:0016020;GO:0015075;GO:0015672;GO:0005215;GO:0043229;GO:0071944;GO:0032502;GO:0005623;GO:0044464;GO:0009826;GO:0046873;GO:0043231;GO:0030001;GO:0022890;GO:0015079;GO:0009653;GO:0040007;GO:0015318;GO:0098805;GO:0005886;GO:0071840;GO:…	K03549	PF02705	3HN8Z	P	sp|Q9LD18|POT4_ARATH Potassium transporter 4 OS=Arabidopsis thaliana OX=3702 GN=POT4 PE=1 SV=2	NP_186854.1 K+ uptake transporter 3 [Arabidopsis thaliana] &gt;Q9LD18.2 RecName: Full=Potassium transporter 4; Short=AtKT4; Short=AtKUP3; Short=AtPOT4 [Arabidopsis thaliana] &gt;AAF14830.1 putative potassium transporter [Arabidopsis thaliana] &gt;AAL32825.1 putative potassium transporter [Arabidopsis thaliana] &gt;AAO30038.1 putative potassium transporter [Arabidopsis thaliana] &gt;AEE73753.1 K+ …
TRINITY_DN100211_c0_g2	376	GO:0043227;GO:0043229;GO:0005622;GO:0044424;GO:0043226;GO:0044444;GO:0005737;GO:0005739;GO:0043231;GO:0005575;GO:0044464;GO:0005623	-	-	3HU5M	S	sp|Q9SK08|LBD11_ARATH LOB domain-containing protein 11 OS=Arabidopsis thaliana OX=3702 GN=LBD11 PE=2 SV=2	XP_020867785.1 LOB domain-containing protein 1 [Arabidopsis lyrata subsp. lyrata] &gt;XP_020867786.1 LOB domain-containing protein 1 [Arabidopsis lyrata subsp. lyrata] &gt;XP_020867787.1 LOB domain-containing protein 1 [Arabidopsis lyrata subsp. lyrata] &gt;EFH65930.1 LOB domain protein 1 [Arabidopsis lyrata subsp. lyrata]
TRINITY_DN100214_c0_g1	308	GO:0044464;GO:0005984;GO:0005623;GO:0071944;GO:0071704;GO:0022890;GO:0005402;GO:0044262;GO:0015294;GO:0015075;GO:0016020;GO:0044237;GO:0005215;GO:1902600;GO:0005975;GO:0015672;GO:0015154;GO:0022857;GO:0015770;GO:0015078;GO:0015293;GO:0098662;GO:0034220;GO:0016021;GO:0098655;GO:0015291;GO:0015766;GO:0006812;GO:0015157;GO:0009987;GO:0008152;GO:0015295;GO:0006810;GO:0008506;GO:0005887;GO:0003674;GO:…	K15378	-	3HWCE	G	sp|Q39231|SUC2_ARATH Sucrose transport protein SUC2 OS=Arabidopsis thaliana OX=3702 GN=SUC2 PE=1 SV=2	KAF2553778.1 hypothetical protein F2Q68_00035316 [Brassica cretica]
TRINITY_DN100218_c0_g1	360	-	-	-	-	-	-	-
TRINITY_DN100219_c0_g1	776	-	-	PF03370	-	-	sp|Q99MR9|PPR3A_MOUSE Protein phosphatase 1 regulatory subunit 3A OS=Mus musculus OX=10090 GN=Ppp1r3a PE=1 SV=2	BAK03092.1 predicted protein [Hordeum vulgare subsp. vulgare]
TRINITY_DN10021_c0_g1	1124	GO:0009987;GO:0008152;GO:0016787;GO:0044237;GO:0016788;GO:0016311;GO:0016791;GO:0003824;GO:0042578;GO:0006793;GO:0008150;GO:0003993;GO:0003674;GO:0006796	-	PF03767	3HPZY	S	sp|P27061|PPA1_SOLLC Acid phosphatase 1 OS=Solanum lycopersicum OX=4081 GN=APS1 PE=2 SV=1	CAE6037316.1 unnamed protein product [Arabidopsis arenosa]
TRINITY_DN100220_c0_g1	366	-	-	-	-	-	-	-
TRINITY_DN100224_c0_g1	1542	-	-	PF00248	37HWG	C	sp|A2XRZ0|AKR2_ORYSI Probable aldo-keto reductase 2 OS=Oryza sativa subsp. indica OX=39946 GN=OsI_15387 PE=3 SV=1	KAF8068168.1 aldo-keto reductase 2 [Scenedesmus sp. PABB004]
TRINITY_DN100226_c0_g1	491	GO:0071704;GO:0008150;GO:1901575;GO:0008422;GO:0044464;GO:0005623;GO:0071944;GO:0003674;GO:0005975;GO:0003824;GO:0044238;GO:0016020;GO:0016798;GO:0005976;GO:0042597;GO:0102483;GO:0009056;GO:0009251;GO:0015926;GO:0044042;GO:0009057;GO:0005575;GO:0016787;GO:0016052;GO:0008152;GO:0004553;GO:0005886;GO:0043170;GO:0000272	K05349	PF00933	3HQZI	T	sp|Q23892|GLUA_DICDI Lysosomal beta glucosidase OS=Dictyostelium discoideum OX=44689 GN=gluA PE=1 SV=2	VVB16928.1 unnamed protein product [Arabis nemorensis]
TRINITY_DN10022_c0_g1	640	GO:0060255;GO:0006807;GO:0010605;GO:0051171;GO:1901363;GO:0043228;GO:0050896;GO:0007275;GO:0000782;GO:0044424;GO:0009987;GO:0006950;GO:0000723;GO:1901360;GO:0044183;GO:2000112;GO:0009408;GO:0065007;GO:0044237;GO:0043229;GO:0051348;GO:0051338;GO:0006996;GO:0031974;GO:0045934;GO:0031324;GO:0051972;GO:0044260;GO:0019222;GO:0051053;GO:0003677;GO:0071840;GO:0065009;GO:0009892;GO:0004857;GO:0043227;GO:…	-	-	3HUY2	S	sp|Q6NME7|TEN1_ARATH CST complex subunit TEN1 OS=Arabidopsis thaliana OX=3702 GN=TEN1 PE=1 SV=1	XP_010511256.1 PREDICTED: CST complex subunit TEN1 isoform X2 [Camelina sativa]
TRINITY_DN100230_c0_g1	1651	-	-	PF14309	3HRDT	S	-	XP_020869976.1 uncharacterized protein LOC110225203 [Arabidopsis lyrata subsp. lyrata] &gt;XP_020869977.1 uncharacterized protein LOC110225203 [Arabidopsis lyrata subsp. lyrata]
TRINITY_DN100233_c0_g1	301	GO:0031224;GO:0044422;GO:0032991;GO:0044436;GO:0044446;GO:0005622;GO:0010598;GO:0006091;GO:0009507;GO:0043226;GO:0044434;GO:0044444;GO:0055035;GO:0008150;GO:0009773;GO:0009534;GO:0031976;GO:0009767;GO:0043227;GO:0009536;GO:0005575;GO:0042651;GO:0015979;GO:0009579;GO:0044425;GO:0016020;GO:0043229;GO:0044237;GO:0044435;GO:0022900;GO:0043231;GO:0005623;GO:0044464;GO:0034357;GO:0055114;GO:0009987;GO:…	-	-	-	-	sp|Q9ZVE7|CRR3_ARATH Probable NAD(P)H dehydrogenase subunit CRR3, chloroplastic OS=Arabidopsis thaliana OX=3702 GN=CRR3 PE=2 SV=1	XP_002875081.1 probable NAD(P)H dehydrogenase subunit CRR3, chloroplastic [Arabidopsis lyrata subsp. lyrata] &gt;EFH51340.1 hypothetical protein ARALYDRAFT_346658 [Arabidopsis lyrata subsp. lyrata]
TRINITY_DN100234_c0_g1	420	GO:0016818;GO:0003824;GO:1902494;GO:0044238;GO:1990405;GO:0003676;GO:0005622;GO:0043967;GO:0006464;GO:0016604;GO:0032555;GO:0031248;GO:0030554;GO:1901564;GO:0008150;GO:0043226;GO:0043232;GO:0071840;GO:0043412;GO:0043543;GO:0043227;GO:0005515;GO:1902493;GO:0031974;GO:0017076;GO:0003823;GO:0044260;GO:1990234;GO:0035267;GO:0003677;GO:0043968;GO:0000123;GO:0044237;GO:0043229;GO:0000812;GO:1902562;GO:…	-	-	-	-	-	-
TRINITY_DN100237_c0_g1	1210	-	-	-	-	-	-	-
TRINITY_DN100238_c0_g1	310	-	-	-	-	-	-	-
TRINITY_DN10023_c0_g1	1373	-	K10355	PF00022	3G790	Z	sp|P02578|ACT1_ACACA Actin-1 OS=Acanthamoeba castellanii OX=5755 PE=1 SV=1	BAK00542.1 predicted protein [Hordeum vulgare subsp. vulgare]
TRINITY_DN10023_c2_g1	1102	GO:0043229;GO:0005524;GO:0043168;GO:0035639;GO:0005930;GO:0097367;GO:0032838;GO:0036156;GO:0005856;GO:0000166;GO:0120025;GO:0044464;GO:0005623;GO:0005488;GO:0008144;GO:0099568;GO:0044424;GO:0043228;GO:0015630;GO:0044463;GO:0005929;GO:1901363;GO:0032553;GO:0005737;GO:0005622;GO:0032559;GO:0044430;GO:0043167;GO:0042995;GO:0044422;GO:0032991;GO:0044446;GO:1902494;GO:0043226;GO:0043232;GO:0044444;GO:…	K10355	PF00022	34K7W	Z	sp|P53470|ACT1_SCHMA Actin-1 OS=Schistosoma mansoni OX=6183 PE=2 SV=1	BAJ97607.1 predicted protein [Hordeum vulgare subsp. vulgare] &gt;BAK00999.1 predicted protein [Hordeum vulgare subsp. vulgare]
TRINITY_DN100240_c0_g1	442	-	-	-	-	-	-	-
TRINITY_DN100241_c0_g1	367	GO:0071310;GO:0043412;GO:0005515;GO:0009738;GO:0043227;GO:0044260;GO:0097306;GO:0017076;GO:0046777;GO:0016773;GO:0044425;GO:0016310;GO:0012505;GO:0005789;GO:0044238;GO:0003824;GO:0046872;GO:0006464;GO:0005622;GO:0071396;GO:0032555;GO:0044444;GO:0043226;GO:1901564;GO:0008150;GO:0030554;GO:0050896;GO:0009737;GO:0031090;GO:0140096;GO:0044424;GO:0009987;GO:0004672;GO:0032553;GO:0009755;GO:0023052;GO:…	K13412	PF00069	37QY2	T	sp|Q8ICR0|CDPK2_PLAF7 Calcium-dependent protein kinase 2 OS=Plasmodium falciparum (isolate 3D7) OX=36329 GN=CDPK2 PE=1 SV=4	KAG2495063.1 hypothetical protein HYH03_006674 [Edaphochlamys debaryana]
TRINITY_DN100242_c0_g1	659	GO:0008150;GO:0005576;GO:0005575;GO:0006950;GO:0009607;GO:0050896;GO:0006952	K13449	-	3HWTT	S	sp|P33154|PR1_ARATH Pathogenesis-related protein 1 OS=Arabidopsis thaliana OX=3702 GN=At2g14610 PE=1 SV=1	XP_023511428.1 basic form of pathogenesis-related protein 1-like [Cucurbita pepo subsp. pepo]
TRINITY_DN100242_c0_g2	349	-	-	-	-	-	-	-
TRINITY_DN100244_c0_g1	440	-	-	PF13458	-	-	-	-
TRINITY_DN100247_c0_g1	312	-	-	-	-	-	-	-
TRINITY_DN100247_c1_g1	324	GO:0019219;GO:0010468;GO:0031326;GO:0043170;GO:0050789;GO:0009415;GO:1901362;GO:1901700;GO:0097159;GO:0140110;GO:0019438;GO:2001141;GO:0010033;GO:0005575;GO:0043565;GO:0051704;GO:0050794;GO:0003700;GO:0034645;GO:0044271;GO:0045893;GO:0018130;GO:0003674;GO:0009628;GO:0046483;GO:0005634;GO:0009615;GO:0008152;GO:0010556;GO:0042221;GO:0009725;GO:0009891;GO:0016070;GO:0006139;GO:0010467;GO:0009889;GO:…	-	-	3HVS1	K	-	-
TRINITY_DN100248_c0_g1	471	-	-	-	-	-	-	-
TRINITY_DN10024_c0_g1	792	-	-	-	3HUPJ	S	-	ESQ37780.1 hypothetical protein EUTSA_v10029140mg, partial [Eutrema salsugineum]
TRINITY_DN10024_c0_g2	538	-	-	-	-	-	-	-
TRINITY_DN10024_c0_g3	521	-	-	-	-	-	-	-
TRINITY_DN100253_c0_g1	372	GO:0006351;GO:0051716;GO:0065007;GO:0044237;GO:0043229;GO:0009736;GO:1901360;GO:2000112;GO:0097659;GO:0050896;GO:0060089;GO:0009416;GO:0044424;GO:0009987;GO:0051171;GO:0023052;GO:0060255;GO:0006807;GO:0009755;GO:0000156;GO:0032870;GO:0031323;GO:0044238;GO:0048511;GO:0005622;GO:0009059;GO:0032774;GO:0080090;GO:1901576;GO:0008150;GO:0051252;GO:0043226;GO:0006725;GO:0071310;GO:0044249;GO:0043227;GO:…	K14492	-	3I08G	K	sp|Q7G8V2|ARR15_ARATH Two-component response regulator ARR15 OS=Arabidopsis thaliana OX=3702 GN=ARR15 PE=1 SV=1	KAF8103277.1 hypothetical protein N665_0188s0220 [Sinapis alba] &gt;KAF8103278.1 hypothetical protein N665_0188s0220 [Sinapis alba]
TRINITY_DN100254_c0_g1	358	-	-	PF09735	-	-	-	-
TRINITY_DN100256_c0_g1	476	-	-	-	-	-	-	-
TRINITY_DN100257_c0_g1	498	-	-	-	-	-	-	-
TRINITY_DN100260_c0_g1	419	-	K09613	PF01398	34GYK	OT	sp|Q54PF3|CSN5_DICDI COP9 signalosome complex subunit 5 OS=Dictyostelium discoideum OX=44689 GN=csn5 PE=1 SV=1	KAF6258441.1 JAB1/Mov34/MPN/PAD-1 ubiquitin protease-domain-containing protein [Scenedesmus sp. NREL 46B-D3]
TRINITY_DN100262_c0_g1	343	-	K01052	PF00561	34K53	I	sp|Q9CPP7|LIPG_MOUSE Gastric triacylglycerol lipase OS=Mus musculus OX=10090 GN=Lipf PE=2 SV=1	KAA6423064.1 lysosomal acid lipase cholesteryl ester hydrolase [Trebouxia sp. A1-2]
TRINITY_DN100264_c0_g1	390	-	-	-	-	-	-	-
TRINITY_DN100268_c0_g1	780	-	-	-	-	-	-	-
TRINITY_DN100269_c0_g1	305	GO:0051234;GO:0044444;GO:0043226;GO:0008150;GO:1901564;GO:0031321;GO:1901576;GO:0051286;GO:0048856;GO:0005622;GO:0012505;GO:0044238;GO:0005628;GO:0006650;GO:0045017;GO:0046486;GO:0008525;GO:0044431;GO:0043935;GO:0009058;GO:0010927;GO:0090407;GO:0030427;GO:0022607;GO:0071702;GO:0120010;GO:0005794;GO:0045184;GO:0044249;GO:0043227;GO:0071840;GO:0005886;GO:0006820;GO:0048193;GO:0005548;GO:0048646;GO:…	-	-	3HPCK	I	sp|P53989|SEC14_CANGA SEC14 cytosolic factor OS=Candida glabrata (strain ATCC 2001 / CBS 138 / JCM 3761 / NBRC 0622 / NRRL Y-65) OX=284593 GN=SEC14 PE=3 SV=1	XP_023922218.1 sec14 cytosolic factor-like [Quercus suber]
TRINITY_DN10026_c0_g1	1728	-	-	PF07727	3HYXB	L	sp|Q94HW2|POLR1_ARATH Retrovirus-related Pol polyprotein from transposon RE1 OS=Arabidopsis thaliana OX=3702 GN=RE1 PE=2 SV=1	BAB10876.1 polyprotein [Arabidopsis thaliana]
TRINITY_DN100276_c0_g1	327	GO:0044425;GO:0008104;GO:0005575;GO:0015833;GO:0071702;GO:0015031;GO:0045184;GO:0005886;GO:0033036;GO:0051179;GO:0008150;GO:0016192;GO:0051234;GO:0098657;GO:0044464;GO:0005623;GO:0006810;GO:0071944;GO:0006897;GO:0071705;GO:0042886;GO:0005905;GO:0012505;GO:0016020	K11827	PF01217	3IG3D	U	sp|Q4ICG5|AP2S_GIBZE AP-2 complex subunit sigma OS=Gibberella zeae (strain ATCC MYA-4620 / CBS 123657 / FGSC 9075 / NRRL 31084 / PH-1) OX=229533 GN=APS2 PE=3 SV=1	KAF1855511.1 hypothetical protein Lal_00002528, partial [Lupinus albus]
TRINITY_DN100279_c0_g1	331	-	-	-	-	-	-	-
TRINITY_DN10027_c0_g1	1296	-	K15032	PF02536	3HS7T	K	-	XP_002886488.1 transcription termination factor MTERF2, chloroplastic [Arabidopsis lyrata subsp. lyrata] &gt;EFH62747.1 hypothetical protein ARALYDRAFT_893270 [Arabidopsis lyrata subsp. lyrata]
TRINITY_DN10027_c0_g2	743	-	K15032	PF02536	3HS7T	K	-	XP_010418174.1 PREDICTED: uncharacterized protein LOC104703800 [Camelina sativa]
TRINITY_DN10027_c0_g3	601	-	K15032	PF02536	3HS7T	K	-	VYS49718.1 unnamed protein product [Arabidopsis thaliana]
TRINITY_DN10027_c0_g4	457	-	K15032	-	3HS7T	K	-	ESQ29229.1 hypothetical protein EUTSA_v10023461mg [Eutrema salsugineum]
TRINITY_DN10027_c1_g1	393	-	K15032	PF02536	3HS7T	K	-	XP_002888053.1 transcription termination factor MTERF15, mitochondrial [Arabidopsis lyrata subsp. lyrata] &gt;EFH64312.1 hypothetical protein ARALYDRAFT_475137 [Arabidopsis lyrata subsp. lyrata]
TRINITY_DN100286_c0_g1	311	-	-	-	-	-	-	-
TRINITY_DN100287_c0_g1	577	-	-	-	-	-	-	-
TRINITY_DN100288_c0_g1	317	-	-	-	-	-	-	-
TRINITY_DN10028_c0_g1	817	-	-	-	-	-	-	VVB15364.1 unnamed protein product [Arabis nemorensis]
TRINITY_DN10028_c0_g2	358	-	-	-	-	-	-	-
TRINITY_DN100297_c0_g1	401	GO:0009100;GO:0045880;GO:0044272;GO:0030166;GO:0044281;GO:0006790;GO:0033692;GO:0006022;GO:0008101;GO:0016758;GO:0008375;GO:0098791;GO:0050509;GO:0008589;GO:0051716;GO:0065007;GO:0048583;GO:0043229;GO:0044237;GO:1905114;GO:0016740;GO:0048522;GO:0023052;GO:0006807;GO:1901135;GO:0034637;GO:0006029;GO:0048584;GO:0198738;GO:0016051;GO:0050896;GO:0090100;GO:0031090;GO:0050508;GO:0009101;GO:0000271;GO:…	-	-	3HQMH	GMW	sp|Q84WB7|GINT1_ARATH Glucosamine inositolphosphorylceramide transferase 1 OS=Arabidopsis thaliana OX=3702 GN=GINT1 PE=1 SV=1	CAA7033924.1 unnamed protein product [Microthlaspi erraticum]
TRINITY_DN10029_c0_g1	1581	GO:0000166;GO:0006950;GO:0016301;GO:0097367;GO:0035639;GO:0071383;GO:0051716;GO:0065007;GO:0038023;GO:0016740;GO:0043229;GO:0044237;GO:0010243;GO:0032553;GO:0009755;GO:2000026;GO:0006807;GO:0023052;GO:0005768;GO:0006793;GO:1901363;GO:0032870;GO:0031090;GO:0050896;GO:0048580;GO:0140096;GO:1901698;GO:0044424;GO:0009987;GO:0060089;GO:0004672;GO:0071396;GO:0031982;GO:0007167;GO:0004888;GO:0032555;GO:…	K13417	PF00069	3HW67	T	sp|Q94F62|BAK1_ARATH BRASSINOSTEROID INSENSITIVE 1-associated receptor kinase 1 OS=Arabidopsis thaliana OX=3702 GN=BAK1 PE=1 SV=2	BAE98698.1 putative receptor protein kinase [Arabidopsis thaliana]
TRINITY_DN10029_c1_g1	629	GO:0004713;GO:0070887;GO:0033612;GO:0016772;GO:0048519;GO:0006468;GO:0009725;GO:0007165;GO:0008152;GO:0008144;GO:0009741;GO:0042221;GO:0010008;GO:0005737;GO:0010200;GO:0018108;GO:0008219;GO:0097708;GO:0016021;GO:0014070;GO:0010941;GO:0016020;GO:0018193;GO:0009719;GO:0005524;GO:0043168;GO:0007178;GO:0060548;GO:0005488;GO:0044464;GO:0004675;GO:0006796;GO:0031410;GO:0005623;GO:0004714;GO:0071944;GO:…	K13416	-	44FW0	T	sp|Q94F62|BAK1_ARATH BRASSINOSTEROID INSENSITIVE 1-associated receptor kinase 1 OS=Arabidopsis thaliana OX=3702 GN=BAK1 PE=1 SV=2	KAF3434990.1 hypothetical protein FNV43_RR22077 [Rhamnella rubrinervis]
TRINITY_DN1002_c0_g1	3279	GO:0043232;GO:0016043;GO:0006725;GO:0043226;GO:0051234;GO:0044444;GO:0016887;GO:0030554;GO:0051179;GO:0140098;GO:0008150;GO:0003674;GO:0005739;GO:0032555;GO:0005634;GO:0046483;GO:0006810;GO:0016462;GO:0032559;GO:0005622;GO:0044428;GO:0003676;GO:0044238;GO:0043167;GO:0016818;GO:0044422;GO:0070035;GO:0003824;GO:0044446;GO:0097159;GO:0034330;GO:0017076;GO:0036094;GO:0031974;GO:0005575;GO:0042623;GO:…	-	PF00271;PF00270	3HS10	A	sp|Q8W4E1|RH47_ARATH DEAD-box ATP-dependent RNA helicase 47, mitochondrial OS=Arabidopsis thaliana OX=3702 GN=RH47 PE=1 SV=2	CAA0196543.1 unnamed protein product [Arabidopsis thaliana] &gt;CAD5312544.1 unnamed protein product [Arabidopsis thaliana]
TRINITY_DN100304_c0_g1	491	-	-	-	-	-	-	-
TRINITY_DN100305_c0_g1	382	GO:0005623;GO:0031410;GO:0006796;GO:0005488;GO:0044464;GO:0120025;GO:0043231;GO:0071944;GO:0032502;GO:0009653;GO:0071704;GO:0048468;GO:0048764;GO:0019637;GO:0016020;GO:0012506;GO:0035556;GO:0009856;GO:0009888;GO:0000902;GO:0006644;GO:0004430;GO:0048469;GO:0005737;GO:0021700;GO:0003006;GO:0030659;GO:0097708;GO:0060560;GO:0022414;GO:0044463;GO:0016772;GO:0007165;GO:0044706;GO:0090627;GO:0030154;GO:…	-	-	4JMWY	T	sp|Q9FMJ0|P4KB1_ARATH Phosphatidylinositol 4-kinase beta 1 OS=Arabidopsis thaliana OX=3702 GN=PI4KB1 PE=1 SV=1	-
TRINITY_DN100309_c0_g1	341	-	-	-	-	-	-	-
TRINITY_DN10030_c0_g1	410	-	-	-	-	-	-	-
TRINITY_DN100315_c0_g1	426	-	-	-	-	-	-	KAG5569006.1 hypothetical protein H5410_063966 [Solanum commersonii]
TRINITY_DN100318_c0_g1	472	-	-	-	-	-	-	-
TRINITY_DN10031_c1_g1	877	GO:0007010;GO:0032561;GO:0043229;GO:0043168;GO:0016817;GO:0006996;GO:0099080;GO:0005488;GO:0044464;GO:0005623;GO:0000166;GO:0005200;GO:0005856;GO:0032550;GO:0035639;GO:0097367;GO:0005198;GO:0032549;GO:0043228;GO:0015630;GO:0099512;GO:0099081;GO:0016787;GO:0019001;GO:0044424;GO:0009987;GO:0003924;GO:0005737;GO:0007017;GO:0005874;GO:0032553;GO:0017111;GO:1901363;GO:0001882;GO:0044422;GO:0016818;GO:…	K07374	PF00091;PF03953	34GYC	Z	sp|P06603|TBA1_DROME Tubulin alpha-1 chain OS=Drosophila melanogaster OX=7227 GN=alphaTub84B PE=1 SV=1	BAK03519.1 predicted protein [Hordeum vulgare subsp. vulgare]
TRINITY_DN100324_c0_g1	345	-	-	-	-	-	-	-
TRINITY_DN100328_c0_g1	1375	-	-	-	-	-	-	-
TRINITY_DN10032_c0_g1	1892	-	-	PF08031;PF01565	3HSZ2	C	sp|Q9FZC5|FOX2_ARATH Berberine bridge enzyme-like 4 OS=Arabidopsis thaliana OX=3702 GN=FOX2 PE=2 SV=1	CAE5958518.1 unnamed protein product [Arabidopsis arenosa]
TRINITY_DN10033_c0_g1	1192	-	-	PF06697	3HSH4	S	-	XP_002869799.1 uncharacterized protein LOC9305870 [Arabidopsis lyrata subsp. lyrata] &gt;EFH46058.1 hypothetical protein ARALYDRAFT_914316 [Arabidopsis lyrata subsp. lyrata]
TRINITY_DN10033_c0_g2	1103	-	-	PF06697	3HSH4	S	-	CAE6134081.1 unnamed protein product [Arabidopsis arenosa]
TRINITY_DN100343_c0_g1	1871	GO:0009941;GO:0006807;GO:0009535;GO:0051188;GO:0055114;GO:0031975;GO:0031090;GO:0050896;GO:0007275;GO:0009416;GO:0031969;GO:0044424;GO:0009987;GO:0016651;GO:1901360;GO:0042440;GO:0016627;GO:0031968;GO:0043229;GO:0044435;GO:0044237;GO:0046148;GO:0009058;GO:0033014;GO:0015979;GO:0043227;GO:0044249;GO:0009534;GO:0005515;GO:0009507;GO:1901576;GO:0055035;GO:0032501;GO:0008150;GO:1901564;GO:0044434;GO:…	K00218	PF00106	3GD2D	Q	sp|Q39617|POR_CHLRE Protochlorophyllide reductase, chloroplastic OS=Chlamydomonas reinhardtii OX=3055 GN=PORA PE=3 SV=1	KAF6264825.1 Protochlorophyllide reductase, chloroplastic [Scenedesmus sp. NREL 46B-D3]
TRINITY_DN100344_c0_g1	327	-	-	-	-	-	-	-
TRINITY_DN100345_c0_g1	432	-	-	PF10206	-	-	sp|Q9W141|ATPK_DROME Putative ATP synthase subunit f, mitochondrial OS=Drosophila melanogaster OX=7227 GN=ATPsynF PE=3 SV=1	-
TRINITY_DN100346_c0_g1	402	-	-	-	44F7K	S	sp|Q9C6B3|GCA2_ARATH Gamma carbonic anhydrase 2, mitochondrial OS=Arabidopsis thaliana OX=3702 GN=GAMMACA2 PE=1 SV=1	GFP88109.1 gamma carbonic anhydrase 1 mitochondrial [Phtheirospermum japonicum]
TRINITY_DN10034_c0_g1	2467	GO:0006793;GO:0005783;GO:0016021;GO:0031984;GO:1903509;GO:1901135;GO:0000030;GO:0005737;GO:0044432;GO:0006807;GO:0006644;GO:0044424;GO:0009987;GO:0008152;GO:0042157;GO:0008610;GO:0046474;GO:0004584;GO:0009247;GO:0008654;GO:0016758;GO:0071704;GO:0044255;GO:0036211;GO:0006506;GO:0043231;GO:0046467;GO:0005623;GO:0044464;GO:0006796;GO:0016740;GO:0043229;GO:0044237;GO:0006629;GO:0016020;GO:0046488;GO:…	K07542	PF04188	3HPXG	G	sp|Q9NUD9|PIGV_HUMAN GPI mannosyltransferase 2 OS=Homo sapiens OX=9606 GN=PIGV PE=1 SV=1	CAE5957234.1 unnamed protein product [Arabidopsis arenosa]
TRINITY_DN100350_c0_g1	547	-	K18195	PF14683	3GAVV	S	-	CAA7035945.1 unnamed protein product [Microthlaspi erraticum]
TRINITY_DN100351_c0_g1	731	-	-	PF04398	3I0AB	S	-	XP_006392664.1 uncharacterized protein LOC18011079 [Eutrema salsugineum] &gt;ESQ29950.1 hypothetical protein EUTSA_v10011815mg [Eutrema salsugineum]
TRINITY_DN100353_c0_g1	771	GO:0043170;GO:1901362;GO:0050789;GO:0010468;GO:1903506;GO:0019219;GO:0043227;GO:0031326;GO:0044249;GO:0006355;GO:0044260;GO:2001141;GO:0034654;GO:0005575;GO:0019438;GO:0009058;GO:0140110;GO:0097159;GO:0003677;GO:0019222;GO:0044238;GO:0031323;GO:0005622;GO:0043565;GO:0034645;GO:0003700;GO:0050794;GO:0003676;GO:1901576;GO:0080090;GO:0032774;GO:0003674;GO:0009059;GO:0005634;GO:0046483;GO:0043226;GO:…	-	PF03514	3HNTX	K	sp|Q9SN22|SCL32_ARATH Scarecrow-like protein 32 OS=Arabidopsis thaliana OX=3702 GN=SCL32 PE=1 SV=1	XP_002865003.2 scarecrow-like protein 32 [Arabidopsis lyrata subsp. lyrata]
TRINITY_DN100355_c0_g1	339	-	-	-	-	-	-	-
TRINITY_DN100356_c0_g1	876	GO:0007275;GO:0009718;GO:0009416;GO:0001067;GO:0044424;GO:0010228;GO:0046283;GO:0008152;GO:0009648;GO:0050896;GO:0022414;GO:1901363;GO:0003006;GO:0043229;GO:0000003;GO:0009649;GO:0009813;GO:0044212;GO:0009605;GO:0065007;GO:0071704;GO:0061458;GO:0042440;GO:0043231;GO:0005488;GO:0005623;GO:0044464;GO:0032502;GO:0043227;GO:0048731;GO:0050789;GO:0042752;GO:0009314;GO:0046148;GO:0009058;GO:0097159;GO:…	K11805	PF00400	3GAX6	S	sp|Q552R1|DCAF7_DICDI DDB1- and CUL4-associated factor 7 homolog OS=Dictyostelium discoideum OX=44689 GN=wdr68 PE=3 SV=2	XP_016568266.1 PREDICTED: WD repeat-containing protein LWD1 [Capsicum annuum] &gt;KAF3659570.1 DDB1- and CUL4-associated factor 7 [Capsicum annuum]
TRINITY_DN100359_c0_g1	584	GO:0033554;GO:0006464;GO:0046872;GO:0043161;GO:0004842;GO:0003824;GO:0044248;GO:0043167;GO:0044267;GO:0031224;GO:0044238;GO:0008150;GO:1901564;GO:0034050;GO:0019941;GO:0019787;GO:0006955;GO:0003674;GO:0010498;GO:0006508;GO:0032446;GO:0005886;GO:0043412;GO:0019538;GO:0043170;GO:0044257;GO:0006952;GO:0002376;GO:0044425;GO:0006511;GO:0005575;GO:0044260;GO:0044237;GO:0000209;GO:1901565;GO:0070647;GO:…	K10636	-	3HSTV	O	sp|Q8W4Q5|RIN3_ARATH E3 ubiquitin protein ligase RIN3 OS=Arabidopsis thaliana OX=3702 GN=RIN3 PE=1 SV=2	CAE6234533.1 unnamed protein product [Arabidopsis arenosa]
TRINITY_DN10035_c0_g1	378	GO:0003674;GO:0050662;GO:0005829;GO:0005739;GO:0044444;GO:0043226;GO:0098542;GO:0008150;GO:0016899;GO:0043167;GO:0003824;GO:0030054;GO:0005622;GO:0030312;GO:0051704;GO:0005618;GO:0005773;GO:0005575;GO:0006979;GO:0036094;GO:0009607;GO:0097159;GO:0005911;GO:0006952;GO:0051707;GO:0005886;GO:0009506;GO:0043227;GO:1901265;GO:0071944;GO:0000166;GO:0005488;GO:0005623;GO:0044464;GO:0043231;GO:0006950;GO:…	-	-	3I1VQ	C	sp|Q9SVG4|RETOL_ARATH Berberine bridge enzyme-like 19 OS=Arabidopsis thaliana OX=3702 GN=At4g20830 PE=1 SV=2	VVB12271.1 unnamed protein product [Arabis nemorensis]
TRINITY_DN100362_c0_g1	313	-	-	-	-	-	-	-
TRINITY_DN100365_c0_g1	1659	GO:0009875;GO:0005737;GO:0005768;GO:0005575;GO:0044431;GO:0016021;GO:0022414;GO:0044425;GO:0097708;GO:0031984;GO:0005886;GO:0048544;GO:0009987;GO:0044424;GO:0005794;GO:0044706;GO:0043227;GO:0008037;GO:0005802;GO:0031982;GO:0071944;GO:0043231;GO:0044464;GO:0005623;GO:0031410;GO:0043226;GO:0007154;GO:0044444;GO:0032501;GO:0008150;GO:0031224;GO:0016020;GO:0012505;GO:0098791;GO:0044422;GO:0044446;GO:…	-	PF01453	3HSS2	S	sp|O65238|Y5537_ARATH G-type lectin S-receptor-like serine/threonine-protein kinase At5g35370 OS=Arabidopsis thaliana OX=3702 GN=At5g35370 PE=2 SV=2	EFH52358.1 hypothetical protein ARALYDRAFT_323720 [Arabidopsis lyrata subsp. lyrata]
TRINITY_DN100366_c0_g1	319	-	-	-	-	-	-	-
TRINITY_DN100367_c0_g1	2099	-	-	-	-	-	-	-
TRINITY_DN100368_c0_g1	571	-	-	-	-	-	-	-
TRINITY_DN10036_c0_g1	1117	GO:0044446;GO:0032991;GO:0098588;GO:0044422;GO:0031224;GO:0031967;GO:0055085;GO:0022829;GO:0005622;GO:0006810;GO:0022803;GO:0003674;GO:0009507;GO:0008150;GO:0051179;GO:0051234;GO:0044444;GO:0044434;GO:0043226;GO:0098805;GO:0006811;GO:0043227;GO:0033365;GO:0034613;GO:0005515;GO:0005575;GO:0009536;GO:0019867;GO:0042802;GO:0044425;GO:0015288;GO:0009526;GO:0031968;GO:0016020;GO:0046930;GO:0005215;GO:…	K17790	-	3GJTY	U	sp|Q9LZH8|OP164_ARATH Outer envelope pore protein 16-4, chloroplastic OS=Arabidopsis thaliana OX=3702 GN=OEP164 PE=2 SV=1	CAE6081250.1 unnamed protein product [Arabidopsis arenosa]
TRINITY_DN100371_c0_g1	731	GO:0006139;GO:0006396;GO:0010467;GO:0044424;GO:0009987;GO:0008152;GO:0016070;GO:0006807;GO:0034641;GO:1901363;GO:0008380;GO:0003723;GO:0071013;GO:0044237;GO:0043229;GO:1901360;GO:0016071;GO:0043231;GO:0006397;GO:0005488;GO:0005623;GO:0000377;GO:0044464;GO:0090304;GO:0071704;GO:0043170;GO:0005681;GO:0000375;GO:0043227;GO:0000398;GO:1990904;GO:0005575;GO:0097159;GO:0044238;GO:0005684;GO:0044422;GO:…	K12863	PF04889	3GA9C	A	sp|Q0VFP5|CWC15_XENTR Protein CWC15 homolog OS=Xenopus tropicalis OX=8364 GN=cwc15 PE=2 SV=1	KAG6533732.1 hypothetical protein ZIOFF_007607 [Zingiber officinale]
TRINITY_DN100377_c0_g1	342	-	-	-	-	-	-	-
TRINITY_DN100379_c0_g1	3543	-	-	PF00098;PF14223	4JTBI	L	sp|P10978|POLX_TOBAC Retrovirus-related Pol polyprotein from transposon TNT 1-94 OS=Nicotiana tabacum OX=4097 PE=2 SV=1	CAB75932.1 putative protein [Arabidopsis thaliana]
TRINITY_DN10037_c0_g1	351	-	-	-	-	-	-	XP_013653841.1 uncharacterized protein LOC106358568 [Brassica napus]
TRINITY_DN100384_c0_g1	485	GO:0005622;GO:0035556;GO:0046872;GO:0043229;GO:0050794;GO:0065007;GO:0051716;GO:0005774;GO:0016020;GO:0043167;GO:0044422;GO:0098588;GO:0044446;GO:0043226;GO:0007154;GO:0044444;GO:0008150;GO:0003674;GO:0019932;GO:0043231;GO:0005623;GO:0044464;GO:0005488;GO:0044424;GO:0009987;GO:0043227;GO:0007165;GO:0031090;GO:0098805;GO:0043169;GO:0050896;GO:0005509;GO:0050789;GO:0019722;GO:0044437;GO:0005773;GO:…	K06268	PF13499;PF13202	3GBSK	T	sp|Q86A72|Y4781_DICDI Recoverin family protein DDB_G0274781 OS=Dictyostelium discoideum OX=44689 GN=DDB_G0274781 PE=3 SV=1	XP_023871825.1 calcineurin subunit B [Quercus suber]
TRINITY_DN100385_c0_g1	420	-	-	-	-	-	-	-
TRINITY_DN100386_c0_g1	429	-	-	-	-	-	-	-
TRINITY_DN100388_c0_g1	534	GO:0065008;GO:0050794;GO:0003700;GO:0003676;GO:0010629;GO:0005622;GO:0046872;GO:0051246;GO:2000113;GO:1903313;GO:0043167;GO:0031323;GO:0003730;GO:0008150;GO:0031327;GO:0051252;GO:0044444;GO:0005829;GO:0061014;GO:0080090;GO:1903311;GO:0003674;GO:0010558;GO:0031326;GO:0006417;GO:0048523;GO:0019219;GO:1903506;GO:0010468;GO:0061013;GO:0050789;GO:0009892;GO:0010604;GO:0019222;GO:0003729;GO:0140110;GO:…	-	PF00642	3GABS	O	sp|Q9XUB2|MEX5_CAEEL Zinc finger protein mex-5 OS=Caenorhabditis elegans OX=6239 GN=mex-5 PE=1 SV=1	XP_011400531.1 Ankyrin repeat domain-containing protein 13C [Auxenochlorella protothecoides] &gt;KFM27548.1 Ankyrin repeat domain-containing protein 13C [Auxenochlorella protothecoides]
TRINITY_DN100389_c0_g1	3067	GO:0065007;GO:0051716;GO:0016020;GO:0009605;GO:0043207;GO:0043168;GO:0005524;GO:0000166;GO:0071944;GO:0006950;GO:0005623;GO:0044464;GO:0005488;GO:0035639;GO:0097367;GO:0050896;GO:0044424;GO:0009987;GO:0008144;GO:0007165;GO:0009626;GO:0045087;GO:0008219;GO:0032553;GO:0005737;GO:0012501;GO:0023052;GO:0009814;GO:1901363;GO:0043167;GO:0005622;GO:0032559;GO:0033554;GO:0050794;GO:0051704;GO:0003674;GO:…	-	PF00931;PF18052	3GEUD	T	sp|Q9STE7|R13L3_ARATH Putative disease resistance RPP13-like protein 3 OS=Arabidopsis thaliana OX=3702 GN=RPP13L3 PE=3 SV=1	CAA0384701.1 unnamed protein product [Arabidopsis thaliana]
TRINITY_DN10038_c0_g1	1757	GO:0043666;GO:0044424;GO:0009987;GO:0006396;GO:0032268;GO:0097659;GO:0010563;GO:1901363;GO:0005654;GO:0035304;GO:0051171;GO:0060255;GO:0006807;GO:0010605;GO:0035303;GO:0044237;GO:0043229;GO:0032269;GO:0065007;GO:0006351;GO:0003723;GO:2000112;GO:1901360;GO:0006397;GO:0051174;GO:1903506;GO:0035305;GO:0044249;GO:0043227;GO:0005681;GO:0004857;GO:0065009;GO:0009892;GO:0032515;GO:0003677;GO:0009058;GO:…	K13216	PF00498	3HQDA	S	sp|Q9FIK2|PP1R8_ARATH Protein phosphatase 1 regulatory inhibitor subunit PPP1R8 homolog OS=Arabidopsis thaliana OX=3702 GN=At5g47790 PE=1 SV=1	XP_020871866.1 nuclear inhibitor of protein phosphatase 1 [Arabidopsis lyrata subsp. lyrata]
TRINITY_DN100391_c0_g1	367	-	-	-	-	-	-	-
TRINITY_DN100393_c0_g1	467	GO:0050662;GO:0006551;GO:0009062;GO:0048038;GO:0043226;GO:0044444;GO:0030258;GO:1901564;GO:0008150;GO:0044238;GO:0044248;GO:1902494;GO:0003824;GO:0005622;GO:0044242;GO:0046872;GO:0031967;GO:0019395;GO:0006979;GO:0051539;GO:0031974;GO:0032592;GO:0031966;GO:0048039;GO:0044425;GO:1901605;GO:0015980;GO:0017133;GO:0033539;GO:0045333;GO:0043227;GO:0000166;GO:0016649;GO:0044281;GO:0043783;GO:0006950;GO:…	K00311	-	3HPFD	C	sp|Q9HZP5|ETFD_PSEAE Electron transfer flavoprotein-ubiquinone oxidoreductase OS=Pseudomonas aeruginosa (strain ATCC 15692 / DSM 22644 / CIP 104116 / JCM 14847 / LMG 12228 / 1C / PRS 101 / PAO1) OX=208964 GN=PA2953 PE=1 SV=1	KAF1854136.1 hypothetical protein Lal_00007156 [Lupinus albus]
TRINITY_DN100394_c0_g1	462	-	-	-	-	-	-	-
TRINITY_DN100396_c0_g1	521	GO:0005840;GO:0044464;GO:0005623;GO:0005575;GO:0005737;GO:1990904;GO:0044444;GO:0043232;GO:0043226;GO:0032991;GO:0043228;GO:0043229;GO:0044424;GO:0005622	K02896	PF01246	3GE6B	J	sp|Q862I1|RL24_BOVIN 60S ribosomal protein L24 OS=Bos taurus OX=9913 GN=RPL24 PE=2 SV=2	XP_030549012.1 60S ribosomal protein L24-like [Rhodamnia argentea]
TRINITY_DN100399_c0_g1	996	GO:0001067;GO:0007275;GO:0044424;GO:0009987;GO:0033036;GO:0097659;GO:0048869;GO:0090567;GO:1901363;GO:0006807;GO:0060255;GO:0051171;GO:0044237;GO:0043229;GO:0000003;GO:0006351;GO:0065007;GO:0048437;GO:2000112;GO:0033037;GO:1901360;GO:0043227;GO:0044249;GO:0048731;GO:1903506;GO:0009908;GO:0000981;GO:0019222;GO:0009058;GO:0003677;GO:0034654;GO:0006355;GO:0044260;GO:0003676;GO:0005622;GO:0048856;GO:…	K09422	PF00249	3HY4R	K	sp|Q9LSI7|MYB35_ARATH Transcription factor MYB35 OS=Arabidopsis thaliana OX=3702 GN=MYB35 PE=1 SV=1	OAP18357.1 hypothetical protein AXX17_AT1G19900 [Arabidopsis thaliana]
TRINITY_DN10039_c0_g1	3204	GO:0050662;GO:0003674;GO:0005488;GO:0016769;GO:0036094;GO:1901363;GO:0019842;GO:0048037;GO:0097159;GO:0070279;GO:0009058;GO:0008150;GO:0008483;GO:0030170;GO:0043167;GO:0003824;GO:0008152;GO:0008144;GO:0016740;GO:0043168	K14270	PF00155	3HW8R	T	sp|Q8GYY0|1A112_ARATH Probable aminotransferase ACS12 OS=Arabidopsis thaliana OX=3702 GN=ACS12 PE=2 SV=2	CAE6234936.1 unnamed protein product [Arabidopsis arenosa]
TRINITY_DN1003_c0_g1	1211	GO:0003674;GO:0005634;GO:0032993;GO:0043232;GO:0016043;GO:0043226;GO:0000786;GO:0008150;GO:0032991;GO:0044422;GO:0034728;GO:0044446;GO:0044815;GO:0005622;GO:0006334;GO:0003676;GO:0022607;GO:0005575;GO:0006333;GO:0097159;GO:0003677;GO:0071840;GO:0043227;GO:0006325;GO:0031497;GO:0000785;GO:0043231;GO:0005623;GO:0005488;GO:0044464;GO:0044085;GO:0065003;GO:0051276;GO:0043933;GO:0044427;GO:0034622;GO:…	K11275	PF00538	3HUY3	B	sp|P40267|H1_SOLPN Histone H1 OS=Solanum pennellii OX=28526 PE=2 SV=1	XP_010467609.1 PREDICTED: histone H1-like [Camelina sativa]
TRINITY_DN100400_c0_g1	567	-	K05658	-	34GT8	Q	sp|Q9CXJ4|MITOS_MOUSE Mitochondrial potassium channel ATP-binding subunit OS=Mus musculus OX=10090 GN=Abcb8 PE=1 SV=1	TYJ28221.1 hypothetical protein E1A91_A07G244400v1 [Gossypium mustelinum]
TRINITY_DN100402_c0_g1	1551	GO:0044267;GO:1901701;GO:0043167;GO:0044238;GO:0006470;GO:0003824;GO:0016311;GO:0016791;GO:0046872;GO:0006464;GO:0004722;GO:0005622;GO:0050794;GO:0051704;GO:0071396;GO:0003674;GO:0071495;GO:0005634;GO:0044444;GO:0098542;GO:0043226;GO:0007154;GO:1901564;GO:0008150;GO:0071310;GO:0019538;GO:0006952;GO:0016788;GO:0043170;GO:0050789;GO:0043412;GO:0051707;GO:0009738;GO:0043227;GO:0097306;GO:0044260;GO:…	K17506	PF00481	3HRDU	T	sp|Q8RX37|P2C02_ARATH Probable protein phosphatase 2C 2 OS=Arabidopsis thaliana OX=3702 GN=At1g07160 PE=2 SV=1	ACA61614.1 hypothetical protein AP3_H09.2 [Arabidopsis lyrata subsp. petraea]
TRINITY_DN100403_c0_g1	1573	GO:0009987;GO:0044424;GO:0008152;GO:0043227;GO:0016070;GO:0016787;GO:0043170;GO:0016788;GO:0006139;GO:0043412;GO:0034641;GO:0097159;GO:1901363;GO:0004519;GO:0009451;GO:0006807;GO:0005575;GO:0005622;GO:0090305;GO:0044237;GO:0043229;GO:0003676;GO:0044238;GO:0003723;GO:0003824;GO:0043226;GO:0090304;GO:0006725;GO:0071704;GO:0008150;GO:1901360;GO:0003674;GO:0004518;GO:0043231;GO:0046483;GO:0044464;GO:…	-	PF01535;PF13041	3HMC3	S	sp|Q1PFC5|PP130_ARATH Pentatricopeptide repeat-containing protein At1g77405 OS=Arabidopsis thaliana OX=3702 GN=At1g77405 PE=2 SV=1	CAE5964450.1 unnamed protein product [Arabidopsis arenosa]
TRINITY_DN100405_c0_g1	306	GO:0046907;GO:0009987;GO:0044424;GO:0033036;GO:0006403;GO:0043228;GO:0050896;GO:0090502;GO:0006396;GO:0000028;GO:0000479;GO:1901363;GO:0008104;GO:0006807;GO:0050657;GO:0015833;GO:0070727;GO:0030684;GO:0043229;GO:0044237;GO:0044445;GO:0055044;GO:0006996;GO:0003723;GO:0000447;GO:0006364;GO:0006886;GO:0034622;GO:0051029;GO:0043933;GO:0071426;GO:0042254;GO:0006950;GO:0000478;GO:0006913;GO:1901360;GO:…	K02998	-	3KQY3	J	sp|A2I3Z2|RSSA_MACHI 40S ribosomal protein SA OS=Maconellicoccus hirsutus OX=177089 PE=2 SV=1	XP_030529789.1 40S ribosomal protein SA-like [Rhodamnia argentea]
TRINITY_DN100406_c0_g1	1395	GO:0044424;GO:0009987;GO:0050896;GO:0010038;GO:1901363;GO:0016874;GO:0032553;GO:0006807;GO:0004812;GO:0044237;GO:0097367;GO:0035639;GO:0044281;GO:1901360;GO:0000166;GO:0016875;GO:0044249;GO:0043043;GO:0009058;GO:0044260;GO:0006399;GO:0034654;GO:0017076;GO:0046686;GO:0005622;GO:0034660;GO:0097056;GO:0044238;GO:0003824;GO:0044444;GO:0006725;GO:0008150;GO:1901564;GO:0140098;GO:0030554;GO:0032774;GO:…	K01875	PF00587;PF02403	4JN3G	J	sp|Q7KWQ2|SYSC_DICDI Serine--tRNA ligase, cytoplasmic OS=Dictyostelium discoideum OX=44689 GN=serS PE=1 SV=1	GAQ80816.1 Seryl-tRNA synthetase class IIa [Klebsormidium nitens]
TRINITY_DN100407_c0_g1	337	GO:0006807;GO:0005737;GO:1901363;GO:0022613;GO:0006518;GO:0034641;GO:0010467;GO:0022626;GO:0006396;GO:0043228;GO:0006139;GO:0016070;GO:0006412;GO:0008152;GO:0044424;GO:0009987;GO:0042273;GO:0005488;GO:0044464;GO:0005623;GO:0042254;GO:0003735;GO:1901360;GO:0071704;GO:0005198;GO:0090304;GO:0044085;GO:0006364;GO:0003723;GO:0044445;GO:0044237;GO:0043229;GO:0005840;GO:0005575;GO:0044260;GO:1990904;GO:…	K02918	-	3I026	J	sp|Q3MHM7|RL35_BOVIN 60S ribosomal protein L35 OS=Bos taurus OX=9913 GN=RPL35 PE=2 SV=3	CAA7033637.1 unnamed protein product [Microthlaspi erraticum]
TRINITY_DN10040_c0_g1	1446	GO:2001141;GO:0006355;GO:0005575;GO:0009536;GO:0019222;GO:0050789;GO:0071840;GO:0010468;GO:1903506;GO:0019219;GO:0043227;GO:0031326;GO:0009507;GO:0080090;GO:0044444;GO:0051252;GO:0043226;GO:0016043;GO:0044434;GO:0008150;GO:0031323;GO:0044446;GO:0044422;GO:0009658;GO:0005622;GO:0050794;GO:0051171;GO:0005737;GO:0060255;GO:0009889;GO:0010556;GO:0044424;GO:0009987;GO:0009570;GO:0005623;GO:0044464;GO:…	-	-	3HNAY	S	sp|Q9SKB6|MRL7L_ARATH Thioredoxin-like fold domain-containing protein MRL7L, chloroplastic OS=Arabidopsis thaliana OX=3702 GN=MRL7L PE=1 SV=1	OAP07369.1 MRL7-L [Arabidopsis thaliana] &gt;VYS54145.1 unnamed protein product [Arabidopsis thaliana]
TRINITY_DN100410_c0_g1	335	-	-	-	-	-	-	-
TRINITY_DN100411_c0_g1	616	-	-	PF03732	KOG0017	L	-	CAA7049796.1 unnamed protein product [Microthlaspi erraticum]
TRINITY_DN100414_c0_g1	1554	-	-	PF03140	3HWPQ	S	sp|Q9SD53|Y3720_ARATH UPF0481 protein At3g47200 OS=Arabidopsis thaliana OX=3702 GN=At3g47200 PE=2 SV=1	KAF2602506.1 hypothetical protein F2Q70_00024980 [Brassica cretica]
TRINITY_DN100419_c0_g1	314	GO:0050801;GO:0044425;GO:0051259;GO:0022607;GO:0071702;GO:0017076;GO:0045184;GO:0005515;GO:0006900;GO:0044433;GO:0034613;GO:0033365;GO:0043227;GO:0055067;GO:0005771;GO:0005911;GO:0009506;GO:0071840;GO:0043226;GO:0005770;GO:0051651;GO:0000904;GO:0051234;GO:0044444;GO:0051649;GO:0030554;GO:0016887;GO:0008150;GO:0071985;GO:0031982;GO:0032555;GO:0031902;GO:0090558;GO:0048856;GO:0005622;GO:0010256;GO:…	K12196	-	3HN90	O	sp|Q9ZNT0|VPS4_ARATH Protein SUPPRESSOR OF K(+) TRANSPORT GROWTH DEFECT 1 OS=Arabidopsis thaliana OX=3702 GN=SKD1 PE=1 SV=1	KAF2567817.1 hypothetical protein F2Q68_00025059 [Brassica cretica]
TRINITY_DN10041_c0_g1	871	GO:0044260;GO:0051241;GO:0008356;GO:0003677;GO:0019222;GO:0010216;GO:0071840;GO:0043412;GO:0048731;GO:0043227;GO:0044764;GO:0043226;GO:0006725;GO:0006304;GO:0051301;GO:0032501;GO:0006259;GO:0008150;GO:0044238;GO:0003824;GO:0005622;GO:0048856;GO:0003676;GO:0009909;GO:0016741;GO:0006807;GO:2000026;GO:0060255;GO:0044728;GO:1901363;GO:0003886;GO:0048580;GO:0009987;GO:0044424;GO:0071514;GO:0007275;GO:…	K00558	PF01426;PF00145	3HMHC	K	sp|P34881|DNMT1_ARATH DNA (cytosine-5)-methyltransferase 1 OS=Arabidopsis thaliana OX=3702 GN=DMT1 PE=1 SV=1	XP_002863965.1 DNA (cytosine-5)-methyltransferase 1 [Arabidopsis lyrata subsp. lyrata] &gt;EFH40224.1 hypothetical protein ARALYDRAFT_331330 [Arabidopsis lyrata subsp. lyrata]
TRINITY_DN10041_c0_g2	658	GO:0010154;GO:0006306;GO:0010069;GO:2000242;GO:0009910;GO:0051704;GO:0032776;GO:0009793;GO:0003674;GO:1903047;GO:0005634;GO:0046483;GO:0016043;GO:0009791;GO:0043170;GO:0051093;GO:0040029;GO:0000281;GO:0009790;GO:0050789;GO:0010468;GO:0000278;GO:0006325;GO:0048608;GO:0003682;GO:0090116;GO:0005575;GO:0009294;GO:0008757;GO:0097159;GO:0050793;GO:0008168;GO:0010070;GO:0043414;GO:0032502;GO:0051239;GO:…	K00558	PF00145;PF01426	3HMHC	K	sp|P34881|DNMT1_ARATH DNA (cytosine-5)-methyltransferase 1 OS=Arabidopsis thaliana OX=3702 GN=DMT1 PE=1 SV=1	XP_010440260.1 PREDICTED: DNA (cytosine-5)-methyltransferase 1-like [Camelina sativa]
TRINITY_DN100423_c0_g1	512	-	-	-	34IRR	S	-	GIL92373.1 hypothetical protein Vretifemale_19897 [Volvox reticuliferus]
TRINITY_DN100426_c0_g1	731	-	K02873	PF01294	3I6SK	J	sp|P0DJ58|RL13_TETTS 60S ribosomal protein L13 OS=Tetrahymena thermophila (strain SB210) OX=312017 GN=RPL13 PE=1 SV=1	XP_031472685.1 60S ribosomal protein L13-like [Nymphaea colorata] &gt;XP_031472688.1 60S ribosomal protein L13-like [Nymphaea colorata]
TRINITY_DN100427_c0_g1	431	-	-	-	-	-	-	-
TRINITY_DN100429_c0_g1	557	-	-	-	-	-	-	XP_010429339.1 PREDICTED: lysozyme D-like [Camelina sativa]
TRINITY_DN10042_c0_g1	2867	GO:0000003;GO:0043229;GO:0044435;GO:0006996;GO:0006886;GO:0009657;GO:0009535;GO:0008104;GO:0009941;GO:0070727;GO:0015833;GO:0031969;GO:0046907;GO:0007275;GO:0044424;GO:0009987;GO:0033036;GO:0072594;GO:0031090;GO:0031975;GO:0008150;GO:0051649;GO:0032501;GO:0055035;GO:0044444;GO:0051234;GO:0043226;GO:0044434;GO:0017038;GO:0009507;GO:0031967;GO:0009658;GO:0005622;GO:0048856;GO:0065002;GO:0071806;GO:…	-	PF02493	3HR8P	U	sp|Q8LPR8|TI100_ARATH Protein TIC 100 OS=Arabidopsis thaliana OX=3702 GN=TIC100 PE=1 SV=1	XP_006287106.2 LOW QUALITY PROTEIN: protein TIC 100 [Capsella rubella]
TRINITY_DN10042_c1_g1	646	-	-	-	-	-	-	KFK42623.1 hypothetical protein AALP_AA1G019400 [Arabis alpina]
TRINITY_DN100431_c0_g1	333	-	-	-	-	-	-	-
TRINITY_DN100434_c0_g1	341	GO:0009112;GO:0046112;GO:0006644;GO:0034641;GO:0042455;GO:0006541;GO:0009141;GO:0046131;GO:0009064;GO:0006139;GO:0006753;GO:0008144;GO:0009218;GO:0008152;GO:0009259;GO:0008610;GO:0003883;GO:0009119;GO:0006796;GO:0005488;GO:0008654;GO:0071704;GO:1901659;GO:0046134;GO:0019637;GO:0006213;GO:0072527;GO:0043168;GO:0005524;GO:0036094;GO:0009117;GO:0006520;GO:0016879;GO:0019438;GO:0009208;GO:0097159;GO:…	K01937	PF00117	4JDYU	F	sp|Q9VUL1|PYRG_DROME CTP synthase OS=Drosophila melanogaster OX=7227 GN=CTPsyn PE=1 SV=2	KAF1880706.1 hypothetical protein Lal_00011765 [Lupinus albus]
TRINITY_DN100435_c0_g1	577	GO:0007275;GO:0016787;GO:0006508;GO:0008152;GO:0140096;GO:0017171;GO:0008236;GO:0043170;GO:0019538;GO:0005576;GO:0006807;GO:0005575;GO:0070011;GO:0048856;GO:0008233;GO:0004175;GO:0003824;GO:0044238;GO:0071704;GO:0042335;GO:0032501;GO:0008150;GO:1901564;GO:0032502;GO:0004252;GO:0003674	-	PF00082	3HRDB	O	sp|F4HYR6|SBT24_ARATH Subtilisin-like protease SBT2.4 OS=Arabidopsis thaliana OX=3702 GN=SBT2.4 PE=1 SV=1	XP_010430283.2 PREDICTED: subtilisin-like protease SBT2.4 [Camelina sativa]
TRINITY_DN100438_c0_g1	330	-	-	-	-	-	sp|P41277|GPP1_YEAST Glycerol-1-phosphate phosphohydrolase 1 OS=Saccharomyces cerevisiae (strain ATCC 204508 / S288c) OX=559292 GN=GPP1 PE=1 SV=3	KAB8527792.1 hypothetical protein FH972_025444 [Carpinus fangiana]
TRINITY_DN10043_c0_g1	3012	GO:0043226;GO:0044434;GO:0044444;GO:0055035;GO:0008150;GO:0006091;GO:0009507;GO:0003674;GO:0005739;GO:0048038;GO:0005622;GO:0031967;GO:0031224;GO:0044422;GO:0044436;GO:0032991;GO:0044446;GO:0098798;GO:1902494;GO:0019866;GO:0003824;GO:0042651;GO:0031966;GO:0015979;GO:0009579;GO:0044425;GO:0009536;GO:0005575;GO:0009534;GO:0031976;GO:1990204;GO:0043227;GO:0045333;GO:0015980;GO:0044429;GO:0044455;GO:…	K05572	-	44P1D	C	sp|Q37165|NU1C_ARATH NAD(P)H-quinone oxidoreductase subunit 1, chloroplastic OS=Arabidopsis thaliana OX=3702 GN=ndhA PE=3 SV=2	YP_009894073.1 NADH dehydrogenase subunit 1 [Conringia orientalis] &gt;QKK40446.1 NADH dehydrogenase subunit 1 [Conringia orientalis]
TRINITY_DN10043_c0_g2	605	-	-	-	-	-	-	-
TRINITY_DN10043_c0_g3	646	-	-	-	-	-	-	-
TRINITY_DN10043_c1_g1	415	-	-	-	-	-	-	-
TRINITY_DN10043_c2_g1	399	-	-	-	-	-	-	-
TRINITY_DN100442_c0_g1	390	-	-	-	-	-	-	-
TRINITY_DN100449_c0_g1	683	-	-	-	-	-	-	-
TRINITY_DN10044_c0_g1	1708	GO:0003674;GO:0006950;GO:0008422;GO:0071704;GO:0008150;GO:0044238;GO:0016798;GO:0006952;GO:0050896;GO:0015926;GO:0003824;GO:0005975;GO:0008152;GO:0004553;GO:0016787;GO:0042973	-	PF00332	3HQ80	G	sp|P52409|E13B_WHEAT Glucan endo-1,3-beta-glucosidase OS=Triticum aestivum OX=4565 GN=GLC1 PE=2 SV=1	OAO95773.1 hypothetical protein AXX17_AT5G24130 [Arabidopsis thaliana]
TRINITY_DN100450_c0_g1	2268	-	-	PF01485;PF13456	3HXZ8	O	sp|F4ITM1|RGSL1_ARATH E3 ubiquitin-protein ligase RSL1 OS=Arabidopsis thaliana OX=3702 GN=RSL1 PE=1 SV=1	NP_200833.1 zinc finger (C3HC4-type RING finger) family protein [Arabidopsis thaliana] &gt;AED97299.1 zinc finger (C3HC4-type RING finger) family protein [Arabidopsis thaliana] &gt;BAA97505.1 unnamed protein product [Arabidopsis thaliana] &gt;VYS70950.1 unnamed protein product [Arabidopsis thaliana]
TRINITY_DN100451_c0_g1	543	-	-	-	34JAB	S	sp|Q8VYD8|ORLIK_ARATH Protein ORANGE-LIKE, chloroplastic OS=Arabidopsis thaliana OX=3702 GN=ORLIKE PE=1 SV=1	KAF6257229.1 chaperone protein dnaJ-like protein [Scenedesmus sp. NREL 46B-D3]
TRINITY_DN100452_c0_g1	354	-	-	-	-	-	-	-
TRINITY_DN100454_c0_g1	879	GO:0044425;GO:0005575;GO:0031224;GO:0016021;GO:0016020	-	PF00335	3HXXQ	S	sp|Q9LSS4|TET4_ARATH Tetraspanin-4 OS=Arabidopsis thaliana OX=3702 GN=TET4 PE=3 SV=1	VYS70947.1 unnamed protein product [Arabidopsis thaliana]
TRINITY_DN100455_c0_g1	595	-	-	-	-	-	sp|P58371|SPM1_MAGO7 Subtilisin-like proteinase Spm1 OS=Magnaporthe oryzae (strain 70-15 / ATCC MYA-4617 / FGSC 8958) OX=242507 GN=SPM1 PE=3 SV=1	KAB8754751.1 hypothetical protein FH972_026542 [Carpinus fangiana]
TRINITY_DN100458_c0_g1	926	GO:0044424;GO:0009987;GO:1901361;GO:0001666;GO:0016051;GO:0072524;GO:0009199;GO:0050896;GO:0034655;GO:0009201;GO:0036293;GO:0006793;GO:0006757;GO:0051188;GO:0034404;GO:0006807;GO:0016053;GO:0032787;GO:1901135;GO:1901293;GO:0043229;GO:0044237;GO:0004332;GO:0009179;GO:0072521;GO:0009165;GO:0009056;GO:0044283;GO:0046700;GO:0055086;GO:0072330;GO:0006950;GO:1901360;GO:0044281;GO:0006096;GO:0043227;GO:…	K01623	PF00274	3HNTH	G	sp|P05064|ALDOA_MOUSE Fructose-bisphosphate aldolase A OS=Mus musculus OX=10090 GN=Aldoa PE=1 SV=2	XP_030531531.1 fructose-bisphosphate aldolase-like [Rhodamnia argentea]
TRINITY_DN10045_c0_g1	2817	GO:0019693;GO:0009150;GO:0043227;GO:0006096;GO:0000287;GO:0044249;GO:0046034;GO:0009142;GO:0072525;GO:0009161;GO:0046434;GO:0009126;GO:0009132;GO:0019362;GO:0019359;GO:0034654;GO:0009058;GO:0090407;GO:0016310;GO:0051186;GO:0044238;GO:0044248;GO:0009127;GO:0003824;GO:1902494;GO:0005622;GO:0046394;GO:0046872;GO:0009205;GO:0006733;GO:1901576;GO:0046390;GO:0046031;GO:0006725;GO:0043226;GO:0009260;GO:…	K01689	PF03952;PF00113	3HYJ5	G	sp|Q9ZW34|ENO3_ARATH Cytosolic enolase 3 OS=Arabidopsis thaliana OX=3702 GN=ENO3 PE=1 SV=1	CAE6019924.1 unnamed protein product [Arabidopsis arenosa]
TRINITY_DN10045_c0_g2	974	GO:0006974;GO:0019985;GO:0034641;GO:0005737;GO:0051726;GO:0006260;GO:0016070;GO:0010556;GO:0008152;GO:0051052;GO:0009889;GO:0071897;GO:0006139;GO:0031981;GO:0071704;GO:0090304;GO:0006261;GO:0044464;GO:0005488;GO:0005623;GO:0043626;GO:0043231;GO:0043233;GO:0097159;GO:0019438;GO:0005575;GO:0031326;GO:0019219;GO:0006298;GO:0050789;GO:1901362;GO:0098772;GO:0043170;GO:0070013;GO:0018130;GO:0044271;GO:…	K04802	PF02747;PF00705	3HMZ9	L	sp|Q9M7Q7|PCNA1_ARATH Proliferating cellular nuclear antigen 1 OS=Arabidopsis thaliana OX=3702 GN=PCNA PE=1 SV=2	XP_006417809.1 proliferating cellular nuclear antigen 1 [Eutrema salsugineum] &gt;ESQ36162.1 hypothetical protein EUTSA_v10008509mg [Eutrema salsugineum]
TRINITY_DN100460_c0_g1	628	GO:0043227;GO:0006325;GO:0005515;GO:0071840;GO:0006333;GO:0005575;GO:0022607;GO:0051169;GO:0005622;GO:0006334;GO:0043044;GO:0034728;GO:0043486;GO:0051649;GO:0008150;GO:0051179;GO:0043226;GO:0016043;GO:0051234;GO:0005634;GO:0006810;GO:0003674;GO:0006338;GO:0046907;GO:0065004;GO:0044424;GO:0009987;GO:0071103;GO:0051641;GO:0042393;GO:0043229;GO:0071824;GO:0006323;GO:0006996;GO:0034622;GO:0043933;GO:…	-	PF14580	3KTBV	D	sp|Q5Y2C3|H2AY_TETTS Histone H2A.Y OS=Tetrahymena thermophila (strain SB210) OX=312017 GN=HTAY PE=2 SV=2	XP_030540087.1 acidic leucine-rich nuclear phosphoprotein 32 family member B-like [Rhodamnia argentea]
TRINITY_DN100461_c0_g1	415	GO:0032504;GO:0044459;GO:0044425;GO:0048869;GO:0016021;GO:0022414;GO:0048229;GO:0005575;GO:0003006;GO:0007275;GO:0009987;GO:0030154;GO:0007276;GO:0019953;GO:0005886;GO:0048232;GO:0031226;GO:0032501;GO:0008150;GO:0048235;GO:0048609;GO:0022412;GO:0055046;GO:0005623;GO:0044464;GO:0009555;GO:0032502;GO:0005887;GO:0071944;GO:0051704;GO:0000003;GO:0048856;GO:0031224;GO:0016020;GO:0044703	-	-	3HNXE	S	sp|F4K4R6|GEX2_ARATH Protein GAMETE EXPRESSED 2 OS=Arabidopsis thaliana OX=3702 GN=GEX2 PE=2 SV=1	ESQ32377.1 hypothetical protein EUTSA_v10005444mg, partial [Eutrema salsugineum]
TRINITY_DN100463_c0_g1	576	-	-	-	-	-	-	-
TRINITY_DN100465_c0_g1	509	-	-	-	-	-	-	-
TRINITY_DN100467_c0_g1	754	-	K02883	PF17135	34J4Y	J	sp|Q5E973|RL18_BOVIN 60S ribosomal protein L18 OS=Bos taurus OX=9913 GN=RPL18 PE=2 SV=3	XP_022839661.1 Ribosomal protein L18e, conserved site [Ostreococcus tauri] &gt;OUS48830.1 ribosomal protein L18 component of cytosolic 80S ribosome and 60S large subunit [Ostreococcus tauri] &gt;CEF99132.1 Ribosomal protein L18e, conserved site [Ostreococcus tauri]
TRINITY_DN100468_c0_g1	769	GO:0000502;GO:0005622;GO:0032991;GO:1902494;GO:1905368;GO:0044238;GO:0044248;GO:0044267;GO:0008150;GO:1901564;GO:0043226;GO:0016043;GO:0044444;GO:0019941;GO:0005829;GO:0005634;GO:0003674;GO:0043248;GO:1905369;GO:0043227;GO:0006508;GO:0071840;GO:0043170;GO:0044257;GO:0019538;GO:0006511;GO:0008541;GO:0005575;GO:0022607;GO:0044260;GO:0044237;GO:0043229;GO:0005838;GO:1901565;GO:0034622;GO:0009056;GO:…	K03039	-	3GDFT	O	sp|Q8GYA6|PS13B_ARATH 26S proteasome non-ATPase regulatory subunit 13 homolog B OS=Arabidopsis thaliana OX=3702 GN=RPN9B PE=1 SV=1	KAF6983953.1 hypothetical protein CFC21_002032 [Triticum aestivum]
TRINITY_DN10046_c0_g1	1262	-	-	-	-	-	-	VYS56236.1 unnamed protein product [Arabidopsis thaliana]
TRINITY_DN100471_c0_g1	308	-	-	-	-	-	-	-
TRINITY_DN100472_c0_g1	417	-	-	-	37K3E	H	-	KAF8065539.1 Pyroxd2 [Scenedesmus sp. PABB004]
TRINITY_DN100473_c0_g1	356	-	-	-	-	-	-	-
TRINITY_DN100475_c0_g1	550	-	K03386	PF10417;PF00578	34IZ9	O	sp|Q9BGI3|PRDX2_BOVIN Peroxiredoxin-2 OS=Bos taurus OX=9913 GN=PRDX2 PE=2 SV=1	GBF91863.1 hypothetical protein Rsub_04968 [Raphidocelis subcapitata]
TRINITY_DN100476_c0_g1	592	-	-	-	-	-	-	-
TRINITY_DN10047_c0_g1	2498	GO:0009314;GO:0097159;GO:1901700;GO:0036094;GO:0017076;GO:1901567;GO:0005575;GO:0071702;GO:0010033;GO:0043227;GO:1901265;GO:0005777;GO:0008289;GO:0033218;GO:0030554;GO:0051179;GO:0008150;GO:0043226;GO:0044444;GO:0051234;GO:0005829;GO:0009753;GO:0032555;GO:0005634;GO:0006810;GO:0009628;GO:0003674;GO:0050662;GO:0009723;GO:0032559;GO:0005622;GO:0043167;GO:1901363;GO:0005737;GO:0032553;GO:0009416;GO:…	-	PF13418;PF13415	3HSVE	I	sp|Q9MA55|ACBP4_ARATH Acyl-CoA-binding domain-containing protein 4 OS=Arabidopsis thaliana OX=3702 GN=ACBP4 PE=1 SV=1	VVA96564.1 unnamed protein product [Arabis nemorensis]
TRINITY_DN100483_c0_g1	343	-	-	-	-	-	sp|Q86IV5|CTNA_DICDI Countin-1 OS=Dictyostelium discoideum OX=44689 GN=ctnA PE=1 SV=1	GHP05720.1 hypothetical protein PPROV_000447000 [Pycnococcus provasolii]
TRINITY_DN100484_c0_g1	346	-	-	-	-	-	-	-
TRINITY_DN100485_c0_g1	896	-	-	-	-	-	-	-
TRINITY_DN100489_c0_g1	618	GO:0030003;GO:0055044;GO:0048583;GO:0000003;GO:0044435;GO:0043229;GO:0006629;GO:1901000;GO:0065007;GO:0009408;GO:0006875;GO:0009635;GO:0006950;GO:0001101;GO:0009409;GO:0098771;GO:0009987;GO:0044424;GO:0031969;GO:1902884;GO:0007275;GO:0009416;GO:0050896;GO:0031975;GO:0031090;GO:0050826;GO:0030004;GO:0048584;GO:0010286;GO:0009941;GO:0048856;GO:0005622;GO:0031967;GO:0065008;GO:0012505;GO:0005774;GO:…	K03098	PF08212	44BPR	M	sp|Q9FGT8|TIL_ARATH Temperature-induced lipocalin-1 OS=Arabidopsis thaliana OX=3702 GN=TIL PE=1 SV=1	KAF1856841.1 hypothetical protein Lal_00044615 [Lupinus albus]
TRINITY_DN10048_c0_g1	4229	-	K06901	PF00860	34JQR	S	sp|Q9SRK7|AZG1_ARATH Adenine/guanine permease AZG1 OS=Arabidopsis thaliana OX=3702 GN=AZG1 PE=2 SV=1	KAF8057763.1 AZG1 [Scenedesmus sp. PABB004]
TRINITY_DN100490_c0_g1	729	GO:0044425;GO:0016491;GO:0050793;GO:0016021;GO:0009058;GO:1901363;GO:0097159;GO:0005575;GO:0044550;GO:0004497;GO:0005506;GO:1905428;GO:0007275;GO:0040008;GO:0008152;GO:0022603;GO:0090709;GO:0055114;GO:0050789;GO:0043169;GO:0032501;GO:0008150;GO:0046906;GO:0040034;GO:0048037;GO:0046914;GO:0016705;GO:0005488;GO:0032502;GO:0003674;GO:0020037;GO:0048856;GO:0046872;GO:0016709;GO:0003824;GO:0016020;GO:…	-	PF00067	3HPY9	Q	sp|Q9FIB0|C78A7_ARATH Cytochrome P450 78A7 OS=Arabidopsis thaliana OX=3702 GN=CYP78A7 PE=2 SV=1	NP_196559.1 cytochrome P450, family 78, subfamily A, polypeptide 7 [Arabidopsis thaliana] &gt;Q9FIB0.1 RecName: Full=Cytochrome P450 78A7 [Arabidopsis thaliana] &gt;AAM97067.1 cytochrome P450 [Arabidopsis thaliana] &gt;AAN15544.1 cytochrome P450 [Arabidopsis thaliana] &gt;AED91472.1 cytochrome P450, family 78, subfamily A, polypeptide 7 [Arabidopsis thaliana] &gt;CAA0401698.1 unnamed protein prod…
TRINITY_DN100491_c0_g1	375	GO:0016491;GO:0006082;GO:0019842;GO:0005575;GO:0036094;GO:0032787;GO:0051213;GO:0008152;GO:0031418;GO:0009987;GO:0005886;GO:0019752;GO:0055114;GO:0043169;GO:0008150;GO:0016706;GO:0071704;GO:0044255;GO:0048037;GO:0005488;GO:0044464;GO:0005623;GO:0016705;GO:0043436;GO:0006631;GO:0071944;GO:0050662;GO:0044281;GO:0003674;GO:0043177;GO:0048244;GO:0043168;GO:0044237;GO:0006629;GO:0048029;GO:0046872;GO:…	K00477	-	4JJUF	I	sp|Q54XH6|PHYD1_DICDI Phytanoyl-CoA dioxygenase domain-containing protein 1 homolog OS=Dictyostelium discoideum OX=44689 GN=phyhd1 PE=3 SV=1	KAB8576222.1 hypothetical protein FH972_025750 [Carpinus fangiana]
TRINITY_DN100493_c0_g1	1919	GO:0055085;GO:0071705;GO:0015849;GO:0005215;GO:0016020;GO:0031224;GO:0051234;GO:0051179;GO:0008150;GO:0071944;GO:0003674;GO:0015711;GO:0005623;GO:0044464;GO:0006865;GO:0006810;GO:0006811;GO:0005886;GO:0006820;GO:0016021;GO:0046942;GO:0044425;GO:0071702;GO:0005575;GO:0022857	-	PF13520;PF13906	3HN1F	E	sp|O64759|CAAT5_ARATH Cationic amino acid transporter 5 OS=Arabidopsis thaliana OX=3702 GN=CAT5 PE=1 SV=1	NP_181041.1 cationic amino acid transporter 5 [Arabidopsis thaliana] &gt;O64759.1 RecName: Full=Cationic amino acid transporter 5 [Arabidopsis thaliana] &gt;AAC12835.1 putative amino acid transporter [Arabidopsis thaliana] &gt;AEC09043.1 cationic amino acid transporter 5 [Arabidopsis thaliana] &gt;OAP07325.1 CAT5 [Arabidopsis thaliana] &gt;CAA0374688.1 unnamed protein product [Arabidopsis thalian…
TRINITY_DN100494_c0_g1	315	-	-	-	-	-	-	-
TRINITY_DN100495_c0_g1	1328	-	-	-	-	-	-	-
TRINITY_DN100498_c0_g1	384	-	K06890	-	34MH0	T	-	KAG2492868.1 hypothetical protein HYH03_008783 [Edaphochlamys debaryana]
TRINITY_DN100499_c0_g1	308	-	-	-	-	-	-	-
TRINITY_DN10049_c0_g1	928	-	-	-	-	-	-	-
TRINITY_DN1004_c0_g1	1499	-	-	PF07800	3HXUK	S	-	XP_006303283.1 uncharacterized protein LOC17898460 [Capsella rubella] &gt;EOA36181.1 hypothetical protein CARUB_v10010051mg [Capsella rubella]
TRINITY_DN1004_c0_g2	1433	-	-	PF07800	3HXUK	S	-	XP_019099013.1 PREDICTED: uncharacterized protein LOC104774196 [Camelina sativa]
TRINITY_DN100501_c0_g1	467	-	-	PF01086	-	-	-	-
TRINITY_DN100502_c0_g1	441	-	-	-	-	-	-	-
TRINITY_DN100504_c0_g1	437	-	-	-	-	-	-	XP_019100922.1 PREDICTED: uncharacterized protein LOC109132916 [Camelina sativa]
TRINITY_DN100506_c0_g1	347	GO:0016020;GO:0009056;GO:0044237;GO:0043229;GO:1901565;GO:0008233;GO:0044464;GO:0005623;GO:0043231;GO:0043632;GO:0071704;GO:1901575;GO:0140096;GO:0005839;GO:0031090;GO:0016787;GO:0008152;GO:0009987;GO:0044424;GO:0051603;GO:0006807;GO:0005737;GO:0009057;GO:0070003;GO:0044265;GO:0030163;GO:0019774;GO:1902494;GO:0003824;GO:0044446;GO:0032991;GO:0098588;GO:0044422;GO:0044267;GO:0044248;GO:1905368;GO:…	K02735	PF00227	4JDTF	O	sp|Q23237|PSB3_CAEEL Proteasome subunit beta type-3 OS=Caenorhabditis elegans OX=6239 GN=pbs-3 PE=1 SV=1	XP_004290891.1 PREDICTED: proteasome subunit beta type-3-A [Fragaria vesca subsp. vesca]
TRINITY_DN100507_c0_g1	2272	GO:0006807;GO:0005575;GO:0034641;GO:1901363;GO:0097159;GO:0009451;GO:0008270;GO:0004519;GO:0006139;GO:0016788;GO:0043170;GO:0043169;GO:0043412;GO:0009987;GO:0044424;GO:0008152;GO:0016787;GO:0016070;GO:0043227;GO:1901360;GO:0004518;GO:0003674;GO:0043231;GO:0046914;GO:0044464;GO:0046483;GO:0005488;GO:0005623;GO:0090304;GO:0006725;GO:0043226;GO:0071704;GO:0008150;GO:0044238;GO:0043167;GO:0003723;GO:…	-	PF13812;PF13041;PF14432;PF20431;PF01535	3HSWA	EGP	sp|Q9LSL8|PP446_ARATH Pentatricopeptide repeat-containing protein At5g65570 OS=Arabidopsis thaliana OX=3702 GN=PCMP-H47 PE=2 SV=1	XP_002864963.2 LOW QUALITY PROTEIN: pentatricopeptide repeat-containing protein At5g65570 [Arabidopsis lyrata subsp. lyrata]
TRINITY_DN100509_c0_g1	598	-	K02873	PF01294	3G8XH	J	sp|P47963|RL13_MOUSE 60S ribosomal protein L13 OS=Mus musculus OX=10090 GN=Rpl13 PE=1 SV=3	XP_002962809.1 60S ribosomal protein L13-1 isoform X2 [Selaginella moellendorffii] &gt;EFJ36272.1 hypothetical protein SELMODRAFT_266648 [Selaginella moellendorffii]
TRINITY_DN10050_c0_g1	616	GO:0005622;GO:0004842;GO:0006464;GO:0043161;GO:0046872;GO:0003824;GO:0044238;GO:0043167;GO:0044248;GO:0044267;GO:1901564;GO:0008150;GO:0019941;GO:0019787;GO:0003674;GO:0010498;GO:0032446;GO:0006508;GO:0043412;GO:0043170;GO:0044257;GO:0019538;GO:0006511;GO:0005575;GO:0044260;GO:0044237;GO:0016740;GO:0070647;GO:0000209;GO:1901565;GO:0009056;GO:0061659;GO:0071704;GO:0036211;GO:1901575;GO:0043632;GO:…	K11982	PF14369	3HNQM	O	sp|Q9SPL2|CIP8_ARATH E3 ubiquitin-protein ligase CIP8 OS=Arabidopsis thaliana OX=3702 GN=CIP8 PE=1 SV=1	NP_201297.1 COP1-interacting protein 8 [Arabidopsis thaliana] &gt;Q9SPL2.1 RecName: Full=E3 ubiquitin-protein ligase CIP8; AltName: Full=COP1-interacting protein 8; AltName: Full=RING-type E3 ubiquitin transferase CIP8 [Arabidopsis thaliana] &gt;AAD56636.1 COP1-interacting protein CIP8 [Arabidopsis thaliana] &gt;AAL91168.1 COP1-interacting protein CIP8 [Arabidopsis thaliana] &gt;AAP42743.1 At5g64…
TRINITY_DN10050_c1_g1	1618	GO:1901363;GO:0051171;GO:0060255;GO:0010556;GO:0044424;GO:0010073;GO:0009889;GO:2000112;GO:0048507;GO:0032502;GO:0005488;GO:0005623;GO:0044464;GO:0043231;GO:0009888;GO:0043229;GO:0065007;GO:0003677;GO:0097159;GO:0140110;GO:0019222;GO:2001141;GO:0006355;GO:0005575;GO:1903506;GO:0010468;GO:0019219;GO:0031326;GO:0043227;GO:0050789;GO:0051252;GO:0043226;GO:0008150;GO:0032501;GO:0003674;GO:0080090;GO:…	-	PF03790	3HY3G	K	sp|Q84JS6|KNAT6_ARATH Homeobox protein knotted-1-like 6 OS=Arabidopsis thaliana OX=3702 GN=KNAT6 PE=1 SV=1	CAE5958350.1 unnamed protein product [Arabidopsis arenosa]
TRINITY_DN100510_c0_g1	1076	-	-	-	-	-	sp|Q9LX89|FB255_ARATH F-box protein At5g10340 OS=Arabidopsis thaliana OX=3702 GN=At5g10340 PE=2 SV=1	XP_002871416.1 F-box protein At5g10340 [Arabidopsis lyrata subsp. lyrata] &gt;EFH47675.1 hypothetical protein ARALYDRAFT_487863 [Arabidopsis lyrata subsp. lyrata]
TRINITY_DN100511_c0_g1	1404	-	-	-	-	-	-	-
TRINITY_DN100512_c0_g1	787	-	-	-	-	-	-	-
TRINITY_DN100513_c0_g1	373	-	-	-	-	-	-	-
TRINITY_DN100516_c0_g1	379	-	-	PF08386	-	-	-	-
TRINITY_DN100517_c0_g1	461	-	K18669	PF00069	34GP2	T	sp|Q9V3D5|DYRK2_DROME Dual specificity tyrosine-phosphorylation-regulated kinase 2 OS=Drosophila melanogaster OX=7227 GN=Dyrk2 PE=1 SV=1	XP_013902109.1 dual-specificity tyrosine-(Y)-phosphorylation regulated kinase [Monoraphidium neglectum] &gt;KIZ03090.1 dual-specificity tyrosine-(Y)-phosphorylation regulated kinase [Monoraphidium neglectum]
TRINITY_DN100518_c0_g1	303	-	-	-	-	-	-	-
TRINITY_DN100519_c0_g1	583	GO:0016655;GO:0031975;GO:0044429;GO:0031090;GO:0055114;GO:0008152;GO:0044424;GO:0005743;GO:0043227;GO:0050136;GO:0005575;GO:0003954;GO:0005737;GO:0031966;GO:0016021;GO:0044425;GO:0016491;GO:0008137;GO:0016020;GO:0031224;GO:0019866;GO:0003824;GO:0044446;GO:0005740;GO:0044422;GO:0005622;GO:0031967;GO:0043229;GO:0003674;GO:0044464;GO:0005623;GO:0016651;GO:0005739;GO:0070469;GO:0043231;GO:0044444;GO:…	K03878	-	34KCT	C	sp|P03888|NU1M_MOUSE NADH-ubiquinone oxidoreductase chain 1 OS=Mus musculus OX=10090 GN=Mtnd1 PE=1 SV=3	YP_008999860.1 NADH dehydrogenase subunit 1 [Prasinoderma coloniale] &gt;YP_008999867.1 NADH dehydrogenase subunit 1 [Prasinoderma coloniale] &gt;AGW52209.1 NADH dehydrogenase subunit 1 [Prasinoderma coloniale] &gt;AGW52235.1 NADH dehydrogenase subunit 1 [Prasinoderma coloniale]
TRINITY_DN10051_c0_g1	2723	GO:0005524;GO:0043168;GO:0051276;GO:0006366;GO:0032508;GO:0090304;GO:0071704;GO:0009411;GO:0044464;GO:0005623;GO:0005488;GO:0043231;GO:0008152;GO:0010556;GO:0008144;GO:0008026;GO:0006367;GO:0016070;GO:0006139;GO:0010467;GO:0009889;GO:0071103;GO:0017111;GO:0034641;GO:0006974;GO:0005737;GO:0006352;GO:0016462;GO:0032559;GO:0050794;GO:0006281;GO:0034645;GO:0043167;GO:0016043;GO:0044271;GO:0018130;GO:…	K10843	PF13625;PF04851;PF16203	3HRQE	KL	sp|Q38861|XPB1_ARATH General transcription and DNA repair factor IIH helicase subunit XPB1 OS=Arabidopsis thaliana OX=3702 GN=XPB1 PE=2 SV=3	AAT36215.1 DNA repair and transcription factor XPB1 [Arabidopsis thaliana] &gt;OAO91014.1 XPB1 [Arabidopsis thaliana] &gt;VYS68928.1 unnamed protein product [Arabidopsis thaliana]
TRINITY_DN100522_c0_g1	330	-	K02109	-	-	-	sp|A4QK04|ATPF_ARAHI ATP synthase subunit b, chloroplastic OS=Arabis hirsuta OX=78191 GN=atpF PE=3 SV=1	ATI24740.1 ATP synthase CF0 subunit I [Plukenetia volubilis]
TRINITY_DN10052_c0_g1	2611	GO:0006807;GO:0046983;GO:0032553;GO:1901363;GO:0016021;GO:0006793;GO:0140096;GO:0016772;GO:0042803;GO:0004672;GO:0006468;GO:0008152;GO:0008144;GO:0009987;GO:0005488;GO:0006796;GO:0016301;GO:0000166;GO:0036211;GO:0071704;GO:0097367;GO:0035639;GO:0016020;GO:0005524;GO:0043168;GO:0044237;GO:0016740;GO:0005575;GO:0036094;GO:0017076;GO:0044260;GO:0042802;GO:0044425;GO:0016773;GO:0016310;GO:0097159;GO:…	-	PF13540;PF07714	3HSXE	T	sp|Q9LY50|ACCR3_ARATH Putative serine/threonine-protein kinase-like protein CCR3 OS=Arabidopsis thaliana OX=3702 GN=CCR3 PE=2 SV=1	XP_024012955.1 LOW QUALITY PROTEIN: putative serine/threonine-protein kinase-like protein CCR3 [Eutrema salsugineum]
TRINITY_DN100531_c0_g1	411	-	K07888	PF00071	44Q55	U	sp|M0RC99|RAB5A_RAT Ras-related protein Rab-5A OS=Rattus norvegicus OX=10116 GN=Rab5a PE=2 SV=1	XP_009610739.1 ras-related protein RHN1-like isoform X2 [Nicotiana tomentosiformis] &gt;XP_016495360.1 PREDICTED: ras-related protein RHN1-like isoform X1 [Nicotiana tabacum] &gt;XP_016495361.1 PREDICTED: ras-related protein RHN1-like isoform X1 [Nicotiana tabacum]
TRINITY_DN100533_c0_g1	360	GO:0006811;GO:0043227;GO:0098656;GO:0046963;GO:0005794;GO:0031227;GO:0072348;GO:0006820;GO:0015215;GO:0042175;GO:0022804;GO:0015605;GO:0098827;GO:0015780;GO:0015165;GO:0044425;GO:0044431;GO:0005575;GO:0090481;GO:0071702;GO:0000295;GO:0015931;GO:0005338;GO:0072530;GO:0055085;GO:0005622;GO:0071705;GO:0044446;GO:0008643;GO:0098588;GO:0044422;GO:0005789;GO:0012505;GO:0031224;GO:1901682;GO:0005459;GO:…	K15277	-	3HZ7U	G	sp|Q29Q28|UTR2_ARATH UDP-galactose/UDP-glucose transporter 2 OS=Arabidopsis thaliana OX=3702 GN=UTR2 PE=2 SV=1	NP_001329228.1 transmembrane protein [Arabidopsis thaliana] &gt;ANM67396.1 transmembrane protein [Arabidopsis thaliana] &gt;CAA0396199.1 unnamed protein product [Arabidopsis thaliana] &gt;VYS63614.1 unnamed protein product [Arabidopsis thaliana]
TRINITY_DN100534_c0_g1	503	-	-	-	-	-	-	-
TRINITY_DN100535_c0_g1	468	GO:0005634;GO:0046483;GO:0044271;GO:0018130;GO:1905269;GO:0009791;GO:0051128;GO:0000122;GO:0044267;GO:2000113;GO:0044428;GO:0009910;GO:0050794;GO:0051247;GO:0001099;GO:0016569;GO:0005575;GO:0019438;GO:0031401;GO:0070013;GO:0043170;GO:0034968;GO:1901362;GO:0050789;GO:0048523;GO:0031326;GO:0070063;GO:0000785;GO:1902679;GO:0009890;GO:0005488;GO:0071704;GO:0061458;GO:0031981;GO:0044427;GO:0016020;GO:…	-	-	3HT28	K	-	-
TRINITY_DN10053_c0_g1	1281	GO:1901360;GO:0005488;GO:0044464;GO:0005623;GO:0043231;GO:1902679;GO:0009890;GO:2000112;GO:0090304;GO:0071704;GO:0045892;GO:0065007;GO:0051253;GO:0006351;GO:0044237;GO:0043229;GO:0051171;GO:0060255;GO:0006807;GO:0010605;GO:1901363;GO:0034641;GO:0006139;GO:0048519;GO:0097659;GO:0010467;GO:0009889;GO:0008152;GO:0010556;GO:0009987;GO:0044424;GO:0016070;GO:0032774;GO:0010558;GO:0003674;GO:0080090;GO:…	-	PF04844;PF13724	3HYUN	K	sp|O04351|OFP2_ARATH Transcription repressor OFP2 OS=Arabidopsis thaliana OX=3702 GN=OFP2 PE=1 SV=1	XP_002879263.2 transcription repressor OFP2 [Arabidopsis lyrata subsp. lyrata]
TRINITY_DN10053_c0_g2	1273	GO:1902679;GO:0009890;GO:0043231;GO:0044464;GO:0005623;GO:0005488;GO:1901360;GO:0071704;GO:2000112;GO:0090304;GO:0006351;GO:0051253;GO:0045892;GO:0065007;GO:0043229;GO:0044237;GO:0060255;GO:0006807;GO:0010605;GO:0051171;GO:0034641;GO:1901363;GO:0009889;GO:0097659;GO:0010467;GO:0048519;GO:0006139;GO:0016070;GO:0009987;GO:0044424;GO:0008152;GO:0010556;GO:0005634;GO:0009059;GO:0046483;GO:0080090;GO:…	-	PF04844;PF13724	3HYUN	K	sp|O04351|OFP2_ARATH Transcription repressor OFP2 OS=Arabidopsis thaliana OX=3702 GN=OFP2 PE=1 SV=1	XP_002879263.2 transcription repressor OFP2 [Arabidopsis lyrata subsp. lyrata]
TRINITY_DN100540_c0_g1	376	GO:0043226;GO:0051234;GO:0071704;GO:0051179;GO:0008150;GO:0010336;GO:0044281;GO:0071944;GO:0031982;GO:0003674;GO:0043436;GO:0044464;GO:0005623;GO:0006810;GO:0005622;GO:0055085;GO:0043229;GO:0044237;GO:0065008;GO:0005215;GO:0016020;GO:0031224;GO:0065007;GO:0048878;GO:0042126;GO:0042592;GO:0016021;GO:0050801;GO:2001057;GO:0055088;GO:0042128;GO:0044425;GO:0006082;GO:0055081;GO:0097708;GO:0071941;GO:…	-	-	3HRJM	E	-	-
TRINITY_DN100543_c0_g1	434	-	-	-	-	-	-	-
TRINITY_DN100544_c0_g1	821	GO:0097159;GO:0003677;GO:0140110;GO:0009058;GO:0019438;GO:0019222;GO:2001141;GO:0044260;GO:0006355;GO:0010033;GO:0005575;GO:0034654;GO:0019219;GO:1903506;GO:0010468;GO:0044249;GO:0043227;GO:0031326;GO:0071310;GO:0043170;GO:0050789;GO:1901362;GO:0051252;GO:0044271;GO:0043226;GO:0006725;GO:0007154;GO:0008150;GO:0018130;GO:0032774;GO:0003674;GO:0080090;GO:1901576;GO:0071495;GO:0046483;GO:0009059;GO:…	K09286	PF00847	3HXGC	K	sp|Q9FJQ2|ERF57_ARATH Ethylene-responsive transcription factor ERF057 OS=Arabidopsis thaliana OX=3702 GN=ERF057 PE=2 SV=1	XP_010484316.1 PREDICTED: ethylene-responsive transcription factor ERF057-like [Camelina sativa]
TRINITY_DN100546_c0_g1	2090	GO:0034641;GO:1901363;GO:0097159;GO:0009451;GO:0004519;GO:0006807;GO:0005575;GO:0044424;GO:0009987;GO:0008152;GO:0016787;GO:0043227;GO:0016070;GO:0006139;GO:0016788;GO:0043170;GO:0043412;GO:0090304;GO:0043226;GO:0006725;GO:0071704;GO:0008150;GO:1901360;GO:0004518;GO:0003674;GO:0043231;GO:0005623;GO:0046483;GO:0044464;GO:0005488;GO:0005622;GO:0043229;GO:0044237;GO:0090305;GO:0003676;GO:0044238;GO:…	-	PF20431;PF01535;PF13041	3HVG4	S	sp|Q9LU94|PP255_ARATH Putative pentatricopeptide repeat-containing protein At3g25970 OS=Arabidopsis thaliana OX=3702 GN=PCMP-E46 PE=3 SV=2	XP_010502486.1 PREDICTED: putative pentatricopeptide repeat-containing protein At3g25970 [Camelina sativa]
TRINITY_DN10054_c0_g1	2325	-	-	-	-	-	-	-
TRINITY_DN100555_c0_g1	491	-	K10704	PF00179	34P9P	O	sp|Q54D06|UBE2V_DICDI Probable ubiquitin-conjugating enzyme E2 variant OS=Dictyostelium discoideum OX=44689 GN=ube2v PE=3 SV=1	PRW05831.1 ubiquitin-conjugating enzyme E2 variant 1D [Chlorella sorokiniana]
TRINITY_DN100556_c0_g1	841	-	-	PF03009	34MJ9	C	sp|P54527|YQIK_BACSU Uncharacterized protein YqiK OS=Bacillus subtilis (strain 168) OX=224308 GN=yqiK PE=4 SV=2	-
TRINITY_DN100559_c0_g1	815	-	-	-	-	-	-	-
TRINITY_DN10055_c0_g1	1097	-	-	-	-	-	-	XP_023641765.1 uncharacterized protein LOC17893921 [Capsella rubella] &gt;EOA29638.1 hypothetical protein CARUB_v10014862mg [Capsella rubella]
TRINITY_DN10055_c1_g1	309	-	-	-	-	-	-	-
TRINITY_DN100560_c0_g1	385	-	-	-	-	-	-	-
TRINITY_DN100563_c0_g1	1052	GO:0072522;GO:0009145;GO:0009135;GO:0009166;GO:1901137;GO:1901566;GO:0044271;GO:0016829;GO:0009123;GO:0018130;GO:0042866;GO:0046939;GO:0006091;GO:0003674;GO:0005829;GO:0043436;GO:0019439;GO:0046483;GO:0006090;GO:0016052;GO:0009108;GO:1901292;GO:0009124;GO:0009156;GO:0044270;GO:1901362;GO:0019752;GO:0009167;GO:0019438;GO:0006082;GO:0046364;GO:0006094;GO:0006165;GO:0009117;GO:0005575;GO:0005975;GO:…	K01623	PF00274	3HVBS	G	sp|P29356|ALF_SPIOL Fructose-bisphosphate aldolase, cytoplasmic isozyme OS=Spinacia oleracea OX=3562 PE=2 SV=1	XP_006398826.1 fructose-bisphosphate aldolase 4, cytosolic [Eutrema salsugineum] &gt;ESQ40279.1 hypothetical protein EUTSA_v10013921mg [Eutrema salsugineum]
TRINITY_DN100564_c0_g1	494	-	-	-	-	-	-	-
TRINITY_DN100566_c0_g1	307	-	-	-	-	-	-	-
TRINITY_DN100568_c0_g1	530	-	-	-	-	-	-	-
TRINITY_DN10056_c0_g1	370	GO:1901363;GO:0034641;GO:0051171;GO:0006807;GO:0060255;GO:0010556;GO:0008152;GO:0009987;GO:0044424;GO:0016070;GO:0050896;GO:0005516;GO:0006139;GO:0010467;GO:0097659;GO:0009889;GO:2000112;GO:0090304;GO:0071704;GO:1901360;GO:0005488;GO:0044464;GO:0005623;GO:0043231;GO:0006950;GO:0043229;GO:0044237;GO:0065007;GO:0006351;GO:0097159;GO:0003677;GO:0019438;GO:0009058;GO:0019222;GO:0044260;GO:2001141;GO:…	-	-	3HPU3	K	sp|F4IPM3|CB60E_ARATH Calmodulin-binding protein 60 E OS=Arabidopsis thaliana OX=3702 GN=CBP60E PE=2 SV=1	XP_020885484.1 calmodulin-binding protein 60 E isoform X2 [Arabidopsis lyrata subsp. lyrata]
TRINITY_DN100570_c0_g1	463	-	-	-	-	-	-	-
TRINITY_DN100572_c0_g1	627	-	-	-	-	-	-	-
TRINITY_DN100574_c0_g1	516	GO:1903311;GO:0003674;GO:0046483;GO:0019439;GO:0005634;GO:0044271;GO:0018130;GO:1903313;GO:0044446;GO:0051246;GO:0044422;GO:0032991;GO:0006352;GO:0050794;GO:0044428;GO:0034645;GO:0051247;GO:0005575;GO:0097159;GO:0019438;GO:0006402;GO:0043170;GO:0070013;GO:0044270;GO:0050789;GO:1901362;GO:0010468;GO:0019219;GO:0006417;GO:0031326;GO:0045948;GO:0005623;GO:0044464;GO:0005488;GO:0044451;GO:0016071;GO:…	K03015	PF03876;PF00575	3KWXE	K	sp|O14459|RPB7_SCHPO DNA-directed RNA polymerase II subunit rpb7 OS=Schizosaccharomyces pombe (strain 972 / ATCC 24843) OX=284812 GN=rpb7 PE=1 SV=1	XP_020275984.1 DNA-directed RNA polymerase II subunit RPB7 [Asparagus officinalis] &gt;XP_020275985.1 DNA-directed RNA polymerase II subunit RPB7 [Asparagus officinalis] &gt;ONK65377.1 uncharacterized protein A4U43_C07F36480 [Asparagus officinalis]
TRINITY_DN100576_c0_g1	440	-	-	-	-	-	-	-
TRINITY_DN100577_c0_g1	639	GO:0019637;GO:0016020;GO:0046488;GO:0043168;GO:0005524;GO:0000003;GO:0006629;GO:0044237;GO:0043229;GO:0016740;GO:0005975;GO:0016301;GO:0006796;GO:0046854;GO:0044464;GO:0005488;GO:0005623;GO:0043231;GO:0044281;GO:0071944;GO:0000166;GO:0032502;GO:0016307;GO:0061458;GO:0071704;GO:0044255;GO:0048367;GO:0035639;GO:0097367;GO:0016772;GO:0007275;GO:0030154;GO:0008152;GO:0044424;GO:0009987;GO:0008144;GO:…	-	PF02493	44F2N	T	-	-
TRINITY_DN100579_c0_g1	341	-	-	-	-	-	-	-
TRINITY_DN10057_c0_g1	1812	GO:0003006;GO:0005737;GO:0048608;GO:0005575;GO:0090567;GO:0022414;GO:0009908;GO:0010227;GO:0099402;GO:0044424;GO:0048731;GO:0007275;GO:0032502;GO:0005829;GO:0044464;GO:0005623;GO:0048437;GO:0044444;GO:0048367;GO:0009791;GO:0032501;GO:0061458;GO:0008150;GO:0009838;GO:0005622;GO:0048856;GO:0000003	-	PF02987	3HZ5K	S	sp|Q9LF88|Y3304_ARATH Late embryogenesis abundant protein At3g53040 OS=Arabidopsis thaliana OX=3702 GN=At3g53040 PE=2 SV=1	CAE6076065.1 unnamed protein product [Arabidopsis arenosa]
TRINITY_DN100580_c0_g1	359	-	-	-	-	-	-	-
TRINITY_DN100581_c0_g1	425	GO:0005856;GO:0098791;GO:0015629;GO:0065007;GO:0048583;GO:0043229;GO:0001959;GO:0005768;GO:0006807;GO:0005654;GO:0140096;GO:0098852;GO:0043228;GO:0031090;GO:0042803;GO:0004190;GO:0016787;GO:0044424;GO:0031902;GO:0031982;GO:0008150;GO:1901564;GO:0098554;GO:0044444;GO:0043232;GO:0005770;GO:0043226;GO:0003824;GO:0009966;GO:0044440;GO:0005789;GO:0012505;GO:0005774;GO:0044238;GO:0044430;GO:0030660;GO:…	-	-	KOG2442	U	-	-
TRINITY_DN100582_c0_g1	343	-	-	-	3GRUE	S	sp|Q84X12|JAL26_ARATH Probable jacalin-related lectin 26 OS=Arabidopsis thaliana OX=3702 GN=JAL26 PE=2 SV=1	XP_002881928.2 jacalin-related lectin 24 [Arabidopsis lyrata subsp. lyrata]
TRINITY_DN100584_c0_g1	607	-	-	-	-	-	-	-
TRINITY_DN100587_c0_g1	316	-	-	-	-	-	-	-
TRINITY_DN10058_c0_g1	309	-	-	-	-	-	-	-
TRINITY_DN100590_c0_g1	1428	-	-	PF00646	3HMPJ	S	sp|Q8GXC7|FBK50_ARATH F-box/kelch-repeat protein At3g06240 OS=Arabidopsis thaliana OX=3702 GN=At3g06240 PE=2 SV=1	XP_020889519.1 F-box/kelch-repeat protein At3g06240 [Arabidopsis lyrata subsp. lyrata]
TRINITY_DN100591_c0_g1	397	-	-	-	-	-	-	-
TRINITY_DN100592_c0_g1	666	-	-	-	-	-	-	-
TRINITY_DN100593_c0_g1	617	-	-	PF00650	3GNFJ	I	sp|Q93ZE9|SFH3_ARATH Phosphatidylinositol/phosphatidylcholine transfer protein SFH3 OS=Arabidopsis thaliana OX=3702 GN=SFH3 PE=2 SV=1	KAG0566571.1 hypothetical protein KC19_7G073500 [Ceratodon purpureus] &gt;KAG0610498.1 hypothetical protein M758_7G071000 [Ceratodon purpureus]
TRINITY_DN100595_c0_g1	733	-	-	-	-	-	-	-
TRINITY_DN100596_c0_g1	312	-	K03097	PF00069	34JBV	DKT	sp|Q8TG13|CSK2A_NEUCR Casein kinase II subunit alpha OS=Neurospora crassa (strain ATCC 24698 / 74-OR23-1A / CBS 708.71 / DSM 1257 / FGSC 987) OX=367110 GN=cka PE=2 SV=1	XP_023901552.1 casein kinase II subunit alpha [Quercus suber] &gt;XP_023905279.1 casein kinase II subunit alpha [Quercus suber]
TRINITY_DN100598_c0_g1	600	-	-	-	-	-	-	-
TRINITY_DN10059_c0_g1	1732	-	-	PF08031;PF01565	3HYZJ	C	sp|Q9SA85|BBE8_ARATH Berberine bridge enzyme-like 8 OS=Arabidopsis thaliana OX=3702 GN=At1g30700 PE=2 SV=1	CAE5958924.1 unnamed protein product [Arabidopsis arenosa]
TRINITY_DN1005_c0_g1	2110	GO:0003674;GO:0005488;GO:0044464;GO:0005623;GO:0005634;GO:0043231;GO:0044444;GO:0016043;GO:0043226;GO:0008150;GO:0012505;GO:0005635;GO:0016020;GO:0031224;GO:0044446;GO:0044422;GO:0006996;GO:0005622;GO:0031967;GO:0043229;GO:0044428;GO:0046983;GO:0031965;GO:0042802;GO:0005575;GO:0005737;GO:0009504;GO:0016021;GO:0006997;GO:0044425;GO:0031975;GO:0031090;GO:0071840;GO:0009987;GO:0044424;GO:0005515;GO:…	-	-	3HY6X	S	sp|Q9FH18|WIP2_ARATH WPP domain-interacting protein 2 OS=Arabidopsis thaliana OX=3702 GN=WIP2 PE=1 SV=1	XP_002866130.1 WPP domain-interacting protein 2 [Arabidopsis lyrata subsp. lyrata] &gt;EFH42389.1 hypothetical protein ARALYDRAFT_918765 [Arabidopsis lyrata subsp. lyrata]
TRINITY_DN1005_c0_g2	2058	GO:0043226;GO:0016043;GO:0044444;GO:0008150;GO:0003674;GO:0005634;GO:0043231;GO:0005488;GO:0044464;GO:0005623;GO:0005622;GO:0006996;GO:0044428;GO:0043229;GO:0031967;GO:0031224;GO:0005635;GO:0016020;GO:0012505;GO:0044422;GO:0044446;GO:0016021;GO:0009504;GO:0044425;GO:0006997;GO:0042802;GO:0031965;GO:0046983;GO:0005737;GO:0005575;GO:0005515;GO:0044424;GO:0009987;GO:0046982;GO:0043227;GO:0042803;GO:…	-	-	3HY6X	S	sp|Q9FH18|WIP2_ARATH WPP domain-interacting protein 2 OS=Arabidopsis thaliana OX=3702 GN=WIP2 PE=1 SV=1	XP_002866130.1 WPP domain-interacting protein 2 [Arabidopsis lyrata subsp. lyrata] &gt;EFH42389.1 hypothetical protein ARALYDRAFT_918765 [Arabidopsis lyrata subsp. lyrata]
TRINITY_DN100601_c0_g1	1660	GO:0043227;GO:0005794;GO:0071840;GO:0043170;GO:0045488;GO:0044425;GO:0044431;GO:0009058;GO:0005575;GO:0047262;GO:0045489;GO:0005622;GO:0010393;GO:0044422;GO:0098588;GO:0044446;GO:0003824;GO:0031224;GO:0005976;GO:0044238;GO:0012505;GO:0008194;GO:0008150;GO:0043226;GO:0016043;GO:0017144;GO:0044444;GO:0009059;GO:0016757;GO:0071555;GO:0045229;GO:1901576;GO:0003674;GO:0000271;GO:0009987;GO:0044424;GO:…	-	PF01501	3HXWM	G	sp|Q0V7R1|GATL3_ARATH Probable galacturonosyltransferase-like 3 OS=Arabidopsis thaliana OX=3702 GN=GATL3 PE=2 SV=1	XP_010495147.1 PREDICTED: probable galacturonosyltransferase-like 3 [Camelina sativa]
TRINITY_DN100603_c0_g1	380	-	K07904	PF00071	44BNH	U	sp|Q39222|RAA1B_ARATH Ras-related protein RABA1b OS=Arabidopsis thaliana OX=3702 GN=RABA1B PE=1 SV=1	PRW57533.1 Ras-related RABA1f [Chlorella sorokiniana]
TRINITY_DN100604_c0_g1	1025	-	-	-	3GNBX	S	-	GIL62576.1 hypothetical protein Vafri_16759 [Volvox africanus]
TRINITY_DN100606_c0_g1	521	-	-	-	-	-	-	-
TRINITY_DN100608_c0_g1	1161	GO:0031090;GO:0019205;GO:0044424;GO:0009987;GO:1901293;GO:0032553;GO:0006807;GO:0006793;GO:1901363;GO:0055086;GO:0009165;GO:0072521;GO:0016740;GO:0046940;GO:0044237;GO:0043229;GO:0000166;GO:1901360;GO:0044281;GO:0016301;GO:0035639;GO:0097367;GO:0043227;GO:0044249;GO:0005773;GO:0017076;GO:0034654;GO:0009058;GO:0090407;GO:0016310;GO:0044238;GO:0005774;GO:0003824;GO:0005622;GO:0046872;GO:1901576;GO:…	K00939	PF00406;PF05191	3HY6E	F	sp|Q9FK35|KAD3_ARATH Adenylate kinase 3 OS=Arabidopsis thaliana OX=3702 GN=ADK2 PE=1 SV=1	ESQ43575.1 hypothetical protein EUTSA_v10014224mg [Eutrema salsugineum]
TRINITY_DN10060_c0_g1	1218	-	-	-	-	-	-	-
TRINITY_DN100610_c0_g1	796	-	-	-	-	-	-	-
TRINITY_DN100613_c0_g1	636	-	-	-	-	-	-	NP_001154616.1 hypothetical protein AT3G13677 [Arabidopsis thaliana] &gt;NP_001327202.1 hypothetical protein AT3G13677 [Arabidopsis thaliana] &gt;AEE75395.1 hypothetical protein AT3G13677 [Arabidopsis thaliana] &gt;ANM65216.1 hypothetical protein AT3G13677 [Arabidopsis thaliana] &gt;OAP04694.1 hypothetical protein AXX17_AT3G14070 [Arabidopsis thaliana]
TRINITY_DN100615_c0_g1	668	-	K01166	PF00445	4JF49	A	sp|Q7M438|RNDI_DICDI Ribonuclease DdI OS=Dictyostelium discoideum OX=44689 GN=ddiA PE=1 SV=3	KAG2486431.1 hypothetical protein HYH03_014878 [Edaphochlamys debaryana]
TRINITY_DN100619_c0_g1	402	-	-	-	-	-	-	-
TRINITY_DN10061_c0_g1	820	GO:0044425;GO:0016021;GO:0031355;GO:0005575;GO:0031350;GO:0005737;GO:0009941;GO:0009536;GO:0019867;GO:0009707;GO:0031301;GO:0009527;GO:0031969;GO:0042170;GO:0031354;GO:0043227;GO:0044424;GO:0031359;GO:0031975;GO:0098805;GO:0031090;GO:0044444;GO:0044434;GO:0043226;GO:0005623;GO:0044464;GO:0043231;GO:0009507;GO:0031967;GO:0044435;GO:0043229;GO:0031351;GO:0005622;GO:0031300;GO:0031358;GO:0044446;GO:…	-	-	3GMHB	S	sp|Q9SVC4|OEP7_ARATH Outer envelope membrane protein 7 OS=Arabidopsis thaliana OX=3702 GN=OEP7 PE=1 SV=1	EOA24991.1 hypothetical protein CARUB_v10018288mg, partial [Capsella rubella]
TRINITY_DN100624_c0_g1	315	-	K11096	PF01423	4JU5C	A	sp|Q9VI10|SMD2_DROME Probable small nuclear ribonucleoprotein Sm D2 OS=Drosophila melanogaster OX=7227 GN=SmD2 PE=1 SV=1	XP_024526942.1 small nuclear ribonucleoprotein Sm D2-like [Selaginella moellendorffii] &gt;XP_024538989.1 small nuclear ribonucleoprotein Sm D2-like [Selaginella moellendorffii]
TRINITY_DN100625_c0_g1	738	GO:0051253;GO:0009651;GO:0005488;GO:0044464;GO:0005623;GO:0009890;GO:1902679;GO:0043231;GO:0071704;GO:0090304;GO:0010467;GO:0006970;GO:0009889;GO:0043169;GO:0006139;GO:0048519;GO:0016070;GO:0010556;GO:0008152;GO:0042221;GO:0010200;GO:0034641;GO:2000113;GO:0043167;GO:0003700;GO:0050794;GO:0034645;GO:0043565;GO:0046483;GO:0009628;GO:0005634;GO:0010558;GO:0003674;GO:0009266;GO:0018130;GO:0031327;GO:…	-	PF13912	KOG1721	B	sp|Q9SSW0|AZF3_ARATH Zinc finger protein AZF3 OS=Arabidopsis thaliana OX=3702 GN=AZF3 PE=1 SV=1	VYS69124.1 unnamed protein product [Arabidopsis thaliana]
TRINITY_DN100627_c0_g1	334	-	-	-	-	-	-	-
TRINITY_DN100628_c0_g1	344	-	-	-	-	-	-	KAF6258647.1 hypothetical protein COO60DRAFT_1517458 [Scenedesmus sp. NREL 46B-D3]
TRINITY_DN10062_c0_g1	777	GO:0044260;GO:0005575;GO:0044425;GO:0006511;GO:0019538;GO:0043170;GO:0044257;GO:0043412;GO:0006508;GO:0032446;GO:0003674;GO:0010498;GO:0019941;GO:0019787;GO:1901564;GO:0008150;GO:0043167;GO:0044248;GO:0044267;GO:0031224;GO:0044238;GO:0003824;GO:0006464;GO:0043161;GO:0046872;GO:0004842;GO:0006807;GO:0009057;GO:0051603;GO:0030163;GO:0016021;GO:0044265;GO:0061630;GO:0043169;GO:0140096;GO:0008152;GO:…	-	PF13639	3HTMP	O	sp|Q9M313|ATL68_ARATH RING-H2 finger protein ATL68 OS=Arabidopsis thaliana OX=3702 GN=ATL68 PE=2 SV=1	XP_019101734.1 PREDICTED: RING-H2 finger protein ATL68 [Camelina sativa]
TRINITY_DN100630_c0_g1	546	GO:0003824;GO:0006112;GO:0016311;GO:0030867;GO:0016791;GO:0009251;GO:0019203;GO:0005789;GO:0044248;GO:0031323;GO:0012505;GO:0044238;GO:0005976;GO:0008138;GO:0005791;GO:0006464;GO:0048856;GO:0005622;GO:0009507;GO:1901564;GO:0008150;GO:0032501;GO:0098554;GO:0044444;GO:0044434;GO:0043226;GO:0043412;GO:0005886;GO:0016788;GO:0015980;GO:0009569;GO:0005844;GO:0043227;GO:0044264;GO:0048731;GO:0005515;GO:…	-	PF16561	4JERK	GV	-	XP_023896121.1 flocculation protein FLO11-like [Quercus suber]
TRINITY_DN100633_c0_g1	2379	GO:1905957;GO:0065007;GO:1901419;GO:0051716;GO:0009719;GO:0016020;GO:0061659;GO:0044237;GO:0043229;GO:0048583;GO:0070647;GO:0016740;GO:0001101;GO:0043231;GO:0016567;GO:0005623;GO:0044464;GO:0051239;GO:0071704;GO:0071215;GO:0036211;GO:1900140;GO:0033993;GO:0070887;GO:0048580;GO:0140096;GO:0010119;GO:0009737;GO:0050896;GO:0009725;GO:0007165;GO:0042221;GO:0044424;GO:0009987;GO:0008152;GO:0006807;GO:…	-	PF00514;PF04564	3HYA1	O	sp|Q9XIJ5|PUB18_ARATH U-box domain-containing protein 18 OS=Arabidopsis thaliana OX=3702 GN=PUB18 PE=1 SV=1	XP_006306849.1 U-box domain-containing protein 18 [Capsella rubella] &gt;EOA39747.1 hypothetical protein CARUB_v10008393mg [Capsella rubella]
TRINITY_DN100635_c0_g1	424	-	-	-	-	-	-	-
TRINITY_DN100636_c0_g1	554	-	-	-	-	-	-	-
TRINITY_DN100637_c0_g1	460	-	-	PF04885	3I0FZ	S	sp|Q9C6T5|STGL3_ARATH Stigma-specific STIG1-like protein 3 OS=Arabidopsis thaliana OX=3702 GN=At1g50720 PE=2 SV=1	XP_006393114.1 stigma-specific STIG1-like protein 3 [Eutrema salsugineum] &gt;ESQ30400.1 hypothetical protein EUTSA_v10012189mg [Eutrema salsugineum]
TRINITY_DN100638_c0_g1	336	-	-	-	-	-	-	-
TRINITY_DN100639_c0_g1	547	-	-	-	-	-	-	-
TRINITY_DN10063_c0_g1	1111	-	-	-	-	-	-	-
TRINITY_DN100647_c0_g1	359	-	-	-	-	-	-	-
TRINITY_DN100648_c0_g1	1210	GO:0009987;GO:0044424;GO:0008152;GO:0009409;GO:0044877;GO:0006289;GO:0006139;GO:0050896;GO:0043130;GO:0006974;GO:0044265;GO:0034641;GO:1901363;GO:0030163;GO:0051603;GO:0006807;GO:0005737;GO:0009057;GO:0070628;GO:0044237;GO:0043229;GO:1901565;GO:0051716;GO:0009056;GO:0071704;GO:1901575;GO:0003684;GO:0090304;GO:0006950;GO:0043231;GO:0043632;GO:0005488;GO:0044464;GO:0005623;GO:1901360;GO:0031593;GO:…	K10839	PF00627;PF09280;PF00240	3G7GW	L	sp|Q84L32|RD23A_ARATH Probable ubiquitin receptor RAD23a OS=Arabidopsis thaliana OX=3702 GN=RAD23A PE=2 SV=2	XP_024444870.1 ubiquitin receptor RAD23c isoform X5 [Populus trichocarpa]
TRINITY_DN10064_c0_g1	349	GO:1901363;GO:0006793;GO:0016021;GO:0032553;GO:0006807;GO:0008152;GO:0008144;GO:0009987;GO:0006468;GO:0004672;GO:0016772;GO:0140096;GO:0097367;GO:0035639;GO:0036211;GO:0071704;GO:0071944;GO:0000166;GO:0005488;GO:0044464;GO:0006796;GO:0005623;GO:0016301;GO:0016740;GO:0043168;GO:0005524;GO:0044237;GO:0016020;GO:0097159;GO:0016773;GO:0044425;GO:0016310;GO:0044260;GO:0005575;GO:0017076;GO:0036094;GO:…	-	-	3HZ9A	T	-	CAF1934925.1 unnamed protein product [Brassica napus] &gt;CDY23630.1 BnaC05g39640D [Brassica napus] &gt;VDD46535.1 unnamed protein product [Brassica oleracea]
TRINITY_DN100651_c0_g1	558	-	-	-	34ICR	C	-	-
TRINITY_DN100653_c0_g1	364	-	-	PF10192	-	-	-	-
TRINITY_DN100655_c0_g1	341	-	-	-	-	-	-	-
TRINITY_DN100659_c0_g1	447	-	-	-	-	-	-	-
TRINITY_DN10065_c0_g1	2177	-	-	PF00439	3HR76	K	-	CAD5326320.1 unnamed protein product [Arabidopsis thaliana]
TRINITY_DN100661_c0_g1	384	-	-	-	-	-	-	XP_006398372.1 uncharacterized protein LOC18016233 [Eutrema salsugineum] &gt;ESQ39825.1 hypothetical protein EUTSA_v10001070mg [Eutrema salsugineum]
TRINITY_DN100662_c0_g1	377	-	-	-	-	-	-	-
TRINITY_DN100663_c0_g1	356	GO:0005911;GO:0065009;GO:0071840;GO:0009790;GO:0009506;GO:0098772;GO:0005515;GO:0048731;GO:0008047;GO:0099513;GO:0022607;GO:0051336;GO:0005575;GO:0048608;GO:0043087;GO:0043547;GO:0044430;GO:0010154;GO:0006457;GO:0044446;GO:0044422;GO:0030054;GO:0005622;GO:0048856;GO:0009793;GO:0003674;GO:0030234;GO:0050790;GO:0005829;GO:0044444;GO:0043226;GO:0016043;GO:0043232;GO:0008092;GO:0008150;GO:0009791;GO:…	-	-	3GCUB	O	sp|Q8BYA0|TBCD_MOUSE Tubulin-specific chaperone D OS=Mus musculus OX=10090 GN=Tbcd PE=1 SV=1	EFJ25897.1 hypothetical protein SELMODRAFT_413196 [Selaginella moellendorffii]
TRINITY_DN100668_c0_g1	380	-	-	PF00013	-	-	sp|Q00341|VIGLN_HUMAN Vigilin OS=Homo sapiens OX=9606 GN=HDLBP PE=1 SV=2	-
TRINITY_DN100669_c0_g1	611	GO:0043169;GO:0044424;GO:0009987;GO:0008152;GO:0043227;GO:0016787;GO:0000287;GO:0005737;GO:0004427;GO:0005575;GO:0006793;GO:0043167;GO:0016818;GO:0003824;GO:0005622;GO:0016817;GO:0016462;GO:0046872;GO:0043229;GO:0044237;GO:0003674;GO:0005739;GO:0043231;GO:0005488;GO:0044464;GO:0006796;GO:0005623;GO:0043226;GO:0044444;GO:0008150	K01507	PF00719	34J91	C	sp|Q949J1|IPYR2_CHLRE Soluble inorganic pyrophosphatase 2 OS=Chlamydomonas reinhardtii OX=3055 GN=ppa2 PE=1 SV=1	PSC74399.1 soluble inorganic pyrophosphatase [Micractinium conductrix]
TRINITY_DN10066_c0_g1	334	-	-	-	-	-	-	-
TRINITY_DN100671_c0_g1	310	GO:0043227;GO:0044424;GO:0071840;GO:0070013;GO:0043228;GO:0022613;GO:0031974;GO:0005575;GO:0044428;GO:0043229;GO:0005622;GO:0044422;GO:0005730;GO:0043233;GO:0044446;GO:0031981;GO:0008150;GO:0043226;GO:0044085;GO:0043232;GO:0042254;GO:0005634;GO:0043231;GO:0044464;GO:0005623	-	-	3IFPC	S	-	-
TRINITY_DN100672_c0_g1	323	-	-	-	-	-	-	-
TRINITY_DN100673_c0_g1	524	-	K02966	PF01090	3GI6B	J	sp|Q9CZX8|RS19_MOUSE 40S ribosomal protein S19 OS=Mus musculus OX=10090 GN=Rps19 PE=1 SV=3	XP_030531671.1 40S ribosomal protein S19-like [Rhodamnia argentea]
TRINITY_DN100675_c0_g1	433	GO:0008152;GO:0006412;GO:0010467;GO:0019843;GO:0022626;GO:0022613;GO:0006518;GO:0034641;GO:0005737;GO:0016020;GO:0043233;GO:0005198;GO:0065003;GO:0044085;GO:0031981;GO:0071704;GO:0071826;GO:0005488;GO:0044464;GO:0005623;GO:0042273;GO:0043231;GO:0043604;GO:0015934;GO:0019538;GO:0070013;GO:0043170;GO:0097159;GO:0003729;GO:0005575;GO:0009536;GO:0034645;GO:0044428;GO:1901566;GO:0044267;GO:0044446;GO:…	K02868	PF00281	3GEA6	J	sp|A8WQ43|RL111_CAEBR 60S ribosomal protein L11-1 OS=Caenorhabditis briggsae OX=6238 GN=rpl-11.1 PE=3 SV=1	ADY38658.1 putative 60S ribosomal protein L11 [Wolffia arrhiza]
TRINITY_DN100677_c0_g1	380	-	K07199	PF04739;PF16561	34HT3	G	sp|Q9SCY5|KINB2_ARATH SNF1-related protein kinase regulatory subunit beta-2 OS=Arabidopsis thaliana OX=3702 GN=KINB2 PE=1 SV=1	KAF6254171.1 hypothetical protein COO60DRAFT_1543014 [Scenedesmus sp. NREL 46B-D3]
TRINITY_DN10067_c0_g1	381	GO:0044260;GO:0044431;GO:0009058;GO:0044425;GO:0043412;GO:0071840;GO:0044264;GO:0005794;GO:0043227;GO:0044249;GO:1901576;GO:0031982;GO:0009059;GO:0045229;GO:0016757;GO:0071555;GO:0070589;GO:0043226;GO:0044444;GO:1901564;GO:0008150;GO:0047517;GO:0044238;GO:0005976;GO:0012505;GO:0045491;GO:0003824;GO:0005622;GO:0006464;GO:0010413;GO:1901135;GO:0034637;GO:0006807;GO:0005768;GO:0031090;GO:0016051;GO:…	-	-	3HN3F	GMW	sp|Q940Q8|IX10L_ARATH Probable beta-1,4-xylosyltransferase IRX10L OS=Arabidopsis thaliana OX=3702 GN=IRX10L PE=2 SV=1	XP_010457848.1 PREDICTED: probable beta-1,4-xylosyltransferase IRX10L isoform X1 [Camelina sativa] &gt;XP_010457856.1 PREDICTED: probable beta-1,4-xylosyltransferase IRX10L isoform X2 [Camelina sativa] &gt;XP_010457864.1 PREDICTED: probable beta-1,4-xylosyltransferase IRX10L isoform X3 [Camelina sativa]
TRINITY_DN100680_c0_g1	473	GO:0071702;GO:0006605;GO:0006623;GO:0005575;GO:0044431;GO:0044425;GO:0033218;GO:0098805;GO:0005886;GO:0006896;GO:0072665;GO:0010209;GO:0034613;GO:0005794;GO:0044433;GO:0045184;GO:0043227;GO:0033365;GO:0031982;GO:0003674;GO:0006810;GO:0031902;GO:0030136;GO:0044444;GO:0007034;GO:0051234;GO:0005770;GO:0043226;GO:0051179;GO:0008150;GO:0051649;GO:0012505;GO:0043167;GO:0044440;GO:0031224;GO:0044446;GO:…	-	-	4JN9F	T	sp|O80977|VSR3_ARATH Vacuolar-sorting receptor 3 OS=Arabidopsis thaliana OX=3702 GN=VSR3 PE=2 SV=1	KAF4382332.1 hypothetical protein G4B88_011284 [Cannabis sativa]
TRINITY_DN100681_c0_g1	338	-	-	-	-	-	-	-
TRINITY_DN100683_c0_g1	644	-	-	PF00160	KOG0882	O	sp|P42693|PPIA_ACIAD Peptidyl-prolyl cis-trans isomerase OS=Acinetobacter baylyi (strain ATCC 33305 / BD413 / ADP1) OX=62977 GN=rotA PE=3 SV=1	XP_003064116.1 predicted protein [Micromonas pusilla CCMP1545] &gt;EEH51738.1 predicted protein [Micromonas pusilla CCMP1545]
TRINITY_DN100684_c0_g1	553	GO:0019222;GO:0005575;GO:0048608;GO:0031974;GO:0046540;GO:1990904;GO:0000398;GO:0043227;GO:0019219;GO:0000375;GO:0048731;GO:0050789;GO:0009790;GO:0043170;GO:0070013;GO:0008150;GO:0009791;GO:0032501;GO:0030532;GO:0043226;GO:0006725;GO:0046483;GO:0005634;GO:0080090;GO:0050794;GO:0009793;GO:0044428;GO:0005622;GO:0048856;GO:0044446;GO:0044422;GO:0032991;GO:0097526;GO:0031323;GO:0044030;GO:0010154;GO:…	K12843	-	3HSC1	A	sp|Q9C7E7|RDM16_ARATH Protein RDM16 OS=Arabidopsis thaliana OX=3702 GN=RDM16 PE=2 SV=1	XP_018435998.1 PREDICTED: U4/U6 small nuclear ribonucleoprotein Prp3-like [Raphanus sativus]
TRINITY_DN100688_c0_g1	347	-	-	-	-	-	-	-
TRINITY_DN100689_c0_g1	2805	-	-	-	-	-	-	XP_020889005.1 uncharacterized protein LOC9319192 [Arabidopsis lyrata subsp. lyrata] &gt;EFH61507.1 hypothetical protein ARALYDRAFT_479330 [Arabidopsis lyrata subsp. lyrata]
TRINITY_DN10068_c0_g1	1826	-	-	-	-	-	-	XP_013647487.1 uncharacterized protein LOC106352394 isoform X2 [Brassica napus]
TRINITY_DN100690_c0_g1	772	GO:0016020;GO:0031224;GO:0044436;GO:0032991;GO:0044422;GO:0044446;GO:0005622;GO:0044237;GO:0044435;GO:0043229;GO:0009507;GO:0043231;GO:0005623;GO:0044464;GO:0044434;GO:0043226;GO:0044444;GO:0055035;GO:0008150;GO:0034357;GO:0009987;GO:0044424;GO:0031976;GO:0009534;GO:0008152;GO:0043227;GO:0009522;GO:0005737;GO:0009536;GO:0005575;GO:0009521;GO:0042651;GO:0016021;GO:0015979;GO:0044425;GO:0009535;GO:…	K02698	PF01241	34N40	S	sp|P14225|PSAK_CHLRE Photosystem I reaction center subunit psaK, chloroplastic OS=Chlamydomonas reinhardtii OX=3055 GN=PSAK PE=1 SV=1	KAF6253965.1 polypeptide 37 precursor [Scenedesmus sp. NREL 46B-D3]
TRINITY_DN100694_c0_g1	473	-	-	-	-	-	-	-
TRINITY_DN100695_c0_g1	442	-	K13303	-	34JUN	T	sp|Q8R4V0|SGK3_RAT Serine/threonine-protein kinase Sgk3 OS=Rattus norvegicus OX=10116 GN=Sgk3 PE=1 SV=2	GAQ80193.1 serine/threonine protein kinase [Klebsormidium nitens]
TRINITY_DN100696_c0_g1	362	GO:0005811;GO:0043229;GO:0005622;GO:0043226;GO:0043232;GO:0044424;GO:0044464;GO:0005623;GO:0005575;GO:0043228	-	-	3HQER	S	sp|Q8GWR2|OBP1B_ARATH Oil body-associated protein 1B OS=Arabidopsis thaliana OX=3702 GN=OBAP1B PE=1 SV=1	CAE6024567.1 unnamed protein product [Arabidopsis arenosa]
TRINITY_DN100699_c0_g1	480	-	-	-	-	-	-	-
TRINITY_DN10069_c0_g1	1263	-	-	-	-	-	sp|Q9SSN3|TIR_ARATH Toll/interleukin-1 receptor-like protein OS=Arabidopsis thaliana OX=3702 GN=TIR PE=1 SV=1	KFK43942.1 hypothetical protein AALP_AA1G194600 [Arabis alpina]
TRINITY_DN10069_c1_g1	430	-	-	-	KOG0017	L	-	-
TRINITY_DN100700_c0_g1	1061	GO:0008150;GO:0043226;GO:0006725;GO:0044444;GO:1901576;GO:0042445;GO:0050662;GO:0065008;GO:0016628;GO:0005622;GO:0048856;GO:0003824;GO:0044238;GO:0005774;GO:0012505;GO:0044425;GO:0009058;GO:0005773;GO:0043227;GO:0005515;GO:0005886;GO:0071840;GO:0040007;GO:0016614;GO:0048037;GO:0009832;GO:0009826;GO:1901360;GO:0000166;GO:0006629;GO:0044237;GO:0043229;GO:0065007;GO:0071554;GO:0019748;GO:0016627;GO:…	K09828	PF01565	3HZMW	C	sp|Q15392|DHC24_HUMAN Delta(24)-sterol reductase OS=Homo sapiens OX=9606 GN=DHCR24 PE=1 SV=2	GBG87533.1 hypothetical protein CBR_g45591 [Chara braunii]
TRINITY_DN100701_c0_g1	451	-	-	-	-	-	-	-
TRINITY_DN100702_c0_g1	342	-	-	-	-	-	-	-
TRINITY_DN100704_c0_g1	359	-	-	-	-	-	-	-
TRINITY_DN100706_c0_g1	335	GO:0044237;GO:0043229;GO:0006351;GO:0071704;GO:0090304;GO:0005623;GO:0005488;GO:0044464;GO:0043231;GO:1901360;GO:0007049;GO:0016070;GO:0008152;GO:0044424;GO:0009987;GO:0010467;GO:0097659;GO:0006139;GO:1901363;GO:0034641;GO:0006807;GO:0003676;GO:0034645;GO:0005622;GO:0032991;GO:0044238;GO:0008150;GO:0018130;GO:0006725;GO:0043226;GO:0044271;GO:0046483;GO:0005634;GO:0009059;GO:0003674;GO:0032774;GO:…	-	-	3HQCI	K	sp|Q6A332|ALY3_ARATH Protein ALWAYS EARLY 3 OS=Arabidopsis thaliana OX=3702 GN=ALY3 PE=1 SV=1	-
TRINITY_DN100709_c0_g1	742	-	K15730	PF04969	3GIT8	O	sp|Q9FR62|P23A_BRANA Co-chaperone protein p23-1 OS=Brassica napus OX=3708 GN=P23-1 PE=1 SV=1	VFQ86741.1 unnamed protein product [Cuscuta campestris]
TRINITY_DN100710_c0_g1	401	GO:0051171;GO:0060255;GO:2000026;GO:0010605;GO:0006807;GO:0005654;GO:0009814;GO:0140096;GO:0097659;GO:0050896;GO:0018393;GO:0045087;GO:0016787;GO:0009987;GO:0044424;GO:0006950;GO:1902459;GO:0009861;GO:0009292;GO:0018394;GO:0018205;GO:0019213;GO:1901360;GO:2000112;GO:0006351;GO:0045892;GO:0065007;GO:0044237;GO:0043229;GO:0006996;GO:0045934;GO:0034654;GO:0031974;GO:0044260;GO:0006355;GO:0031324;GO:…	K06067	PF00850	3I6D8	B	sp|P56517|HDAC1_CHICK Histone deacetylase 1 OS=Gallus gallus OX=9031 GN=HDAC1 PE=2 SV=1	XP_030540028.1 histone deacetylase 1-like [Rhodamnia argentea]
TRINITY_DN100711_c0_g1	738	-	-	-	-	-	-	-
TRINITY_DN100712_c0_g1	362	-	-	-	-	-	-	-
TRINITY_DN100715_c0_g1	610	-	-	-	-	-	-	-
TRINITY_DN100716_c0_g1	908	-	-	-	-	-	-	VVB12603.1 unnamed protein product [Arabis nemorensis]
TRINITY_DN100717_c0_g1	668	-	-	-	-	-	-	XP_010510625.1 PREDICTED: uncharacterized protein LOC104786870 [Camelina sativa]
TRINITY_DN10071_c0_g1	2333	GO:0005774;GO:0098660;GO:0005622;GO:0065008;GO:0051234;GO:0044444;GO:0043226;GO:0008150;GO:0098719;GO:0006873;GO:0022804;GO:0005886;GO:0055067;GO:0043227;GO:0005773;GO:0055082;GO:0008324;GO:0051453;GO:0050801;GO:0044425;GO:0015077;GO:0065007;GO:0055075;GO:0015385;GO:0015672;GO:0030003;GO:0043229;GO:0006950;GO:0010107;GO:0030001;GO:0015079;GO:0050896;GO:0006812;GO:0031090;GO:0015291;GO:0010119;GO:…	-	PF00999	3HYCS	P	sp|Q84WG1|NHX3_ARATH Sodium/hydrogen exchanger 3 OS=Arabidopsis thaliana OX=3702 GN=NHX3 PE=1 SV=2	XP_006297341.1 sodium/hydrogen exchanger 3 [Capsella rubella] &gt;EOA30239.1 hypothetical protein CARUB_v10013371mg [Capsella rubella]
TRINITY_DN100721_c0_g1	879	-	-	-	-	-	-	-
TRINITY_DN100722_c0_g1	697	-	-	-	KOG0017	L	sp|Q94HW2|POLR1_ARATH Retrovirus-related Pol polyprotein from transposon RE1 OS=Arabidopsis thaliana OX=3702 GN=RE1 PE=2 SV=1	KAE8659913.1 putative disease resistance protein [Hibiscus syriacus]
TRINITY_DN100724_c0_g1	307	-	-	-	-	-	-	VVW86174.1 unnamed protein product, partial [Nymphaea colorata]
TRINITY_DN100726_c0_g1	344	-	-	-	-	-	-	-
TRINITY_DN100727_c0_g1	338	-	-	-	-	-	-	-
TRINITY_DN100728_c0_g1	308	GO:0044446;GO:0030054;GO:0044422;GO:0032991;GO:0043167;GO:0044267;GO:1901566;GO:0044391;GO:0042255;GO:0044238;GO:0034645;GO:0046872;GO:0005622;GO:0030312;GO:0005829;GO:0009059;GO:0003674;GO:0070925;GO:1901576;GO:0008150;GO:1901564;GO:0043603;GO:0044444;GO:0043226;GO:0043232;GO:0044271;GO:0016043;GO:0005886;GO:0071840;GO:0009506;GO:0019538;GO:0005911;GO:0043170;GO:0005844;GO:0022618;GO:0044249;GO:…	K02978	-	3GJN1	J	sp|Q3T0B7|RS27L_BOVIN 40S ribosomal protein S27-like OS=Bos taurus OX=9913 GN=RPS27L PE=3 SV=3	OVA09707.1 Ribosomal protein S27e [Macleaya cordata]
TRINITY_DN10072_c0_g1	1290	GO:0032958;GO:0061458;GO:0071704;GO:0032502;GO:0006796;GO:0005623;GO:0005488;GO:0044464;GO:0120025;GO:0043231;GO:0009856;GO:0010183;GO:0005524;GO:0043168;GO:0047326;GO:0009605;GO:0019637;GO:0022414;GO:0040011;GO:0003006;GO:0006935;GO:0010556;GO:0008152;GO:0042221;GO:0008144;GO:0044706;GO:0016772;GO:0048316;GO:0009889;GO:0009791;GO:0043647;GO:0003674;GO:0009555;GO:1901617;GO:0006066;GO:0005634;GO:…	K00915	PF03770	3HSAG	IKT	sp|Q9FLT2|IPMKB_ARATH Inositol polyphosphate multikinase beta OS=Arabidopsis thaliana OX=3702 GN=IPK2b PE=1 SV=1	XP_006280873.1 inositol polyphosphate multikinase beta [Capsella rubella] &gt;XP_023639920.1 inositol polyphosphate multikinase beta [Capsella rubella] &gt;EOA13771.1 hypothetical protein CARUB_v10026865mg [Capsella rubella]
TRINITY_DN100738_c0_g1	365	-	-	-	-	-	-	-
TRINITY_DN100739_c0_g1	351	-	-	-	-	-	-	-
TRINITY_DN10073_c0_g1	966	GO:0016070;GO:0008152;GO:0009987;GO:0044424;GO:0043144;GO:0010467;GO:0006396;GO:0043169;GO:0006139;GO:1901363;GO:0034641;GO:0016074;GO:0006807;GO:0043229;GO:0044237;GO:0008380;GO:0016020;GO:0071704;GO:0090304;GO:0000377;GO:0044464;GO:0006397;GO:0005623;GO:0005488;GO:0043231;GO:0016071;GO:1901360;GO:0034470;GO:0043227;GO:0000375;GO:0005681;GO:0043170;GO:0034247;GO:0097159;GO:0003677;GO:0005575;GO:…	K13127	-	3GBFK	O	sp|Q9FNG6|C3H51_ARATH Zinc finger CCCH domain-containing protein 51 OS=Arabidopsis thaliana OX=3702 GN=At5g06420 PE=2 SV=1	XP_020877998.1 pre-mRNA-splicing factor cwc24 [Arabidopsis lyrata subsp. lyrata]
TRINITY_DN100744_c0_g1	326	-	-	-	-	-	-	-
TRINITY_DN100747_c0_g1	316	-	-	-	-	-	-	-
TRINITY_DN100749_c0_g1	463	-	-	-	-	-	-	KAF6266326.1 hypothetical protein COO60DRAFT_447215 [Scenedesmus sp. NREL 46B-D3]
TRINITY_DN10074_c0_g1	1382	GO:0005575;GO:0051187;GO:0006979;GO:0009536;GO:0042744;GO:0009579;GO:1901700;GO:0097159;GO:0042651;GO:0097237;GO:0043227;GO:0031976;GO:0009534;GO:0005634;GO:0042737;GO:0003674;GO:0009507;GO:0008150;GO:0009636;GO:0031977;GO:0055035;GO:0044444;GO:0004130;GO:0044434;GO:0009543;GO:0017144;GO:0043226;GO:0003824;GO:0044446;GO:0044436;GO:0044422;GO:0044248;GO:0051186;GO:0016209;GO:0042743;GO:0016684;GO:…	K00434	PF00141	3HRFB	S	sp|P82281|TL29_ARATH Thylakoid lumenal 29 kDa protein, chloroplastic OS=Arabidopsis thaliana OX=3702 GN=TL29 PE=1 SV=2	NP_001329836.1 ascorbate peroxidase 4 [Arabidopsis thaliana] &gt;ANM68055.1 ascorbate peroxidase 4 [Arabidopsis thaliana]
TRINITY_DN100750_c0_g1	319	-	-	-	-	-	-	-
TRINITY_DN100757_c0_g1	468	-	-	-	3HV3M	S	-	XP_010477470.1 PREDICTED: zinc finger CCCH domain-containing protein 15 homolog [Camelina sativa]
TRINITY_DN100759_c0_g1	366	GO:0044237;GO:0043229;GO:0006629;GO:0000003;GO:0002252;GO:0051716;GO:0044283;GO:0046165;GO:0009408;GO:0031667;GO:0044255;GO:0071496;GO:0042742;GO:0044281;GO:0006950;GO:0044424;GO:0009987;GO:0019751;GO:0009617;GO:0009620;GO:0007275;GO:0009416;GO:1901615;GO:0046474;GO:0050896;GO:0050832;GO:0016051;GO:0006793;GO:0034637;GO:0006807;GO:0048856;GO:0005622;GO:0033554;GO:0044238;GO:0009644;GO:0042493;GO:…	K01858	-	3IACT	I	sp|Q54N49|INO1_DICDI Inositol-3-phosphate synthase OS=Dictyostelium discoideum OX=44689 GN=ino1 PE=3 SV=1	RMZ55969.1 hypothetical protein APUTEX25_004393, partial [Auxenochlorella protothecoides]
TRINITY_DN100761_c0_g1	518	-	-	PF00188	3HUM6	S	sp|Q40374|PR1_MEDTR Pathogenesis-related protein PR-1 OS=Medicago truncatula OX=3880 GN=PR-1 PE=2 SV=1	CAE6166070.1 unnamed protein product [Arabidopsis arenosa]
TRINITY_DN100765_c0_g1	804	GO:0031224;GO:0016021;GO:0016020;GO:0005575;GO:0044425	-	PF03798	4JF52	T	sp|Q550S9|TLC4B_DICDI TLC domain-containing protein 4 B OS=Dictyostelium discoideum OX=44689 GN=tlcd4b PE=3 SV=1	KAA8544759.1 hypothetical protein F0562_019537 [Nyssa sinensis]
TRINITY_DN100767_c0_g1	580	-	-	-	-	-	-	XP_002503077.1 predicted protein [Micromonas commoda] &gt;ACO64335.1 predicted protein [Micromonas commoda]
TRINITY_DN100768_c0_g1	367	-	K03695	PF10431	34H87	O	sp|Q8DJ40|CLPB1_THEEB Chaperone protein ClpB 1 OS=Thermosynechococcus elongatus (strain BP-1) OX=197221 GN=clpB1 PE=3 SV=1	KAF8065731.1 CLPB3 [Scenedesmus sp. PABB004]
TRINITY_DN100769_c0_g1	1038	-	-	-	-	-	-	-
TRINITY_DN100770_c0_g1	695	-	K12627	-	34MMS	A	sp|Q3ZCE0|LSM8_BOVIN U6 snRNA-associated Sm-like protein LSm8 OS=Bos taurus OX=9913 GN=LSM8 PE=3 SV=3	KAF6250597.1 hypothetical protein COO60DRAFT_796004 [Scenedesmus sp. NREL 46B-D3]
TRINITY_DN100771_c0_g1	891	-	-	-	-	-	-	-
TRINITY_DN100773_c0_g1	470	-	-	-	-	-	-	-
TRINITY_DN100775_c0_g1	665	-	-	-	-	-	-	-
TRINITY_DN100777_c0_g1	455	-	-	PF00120	34MMR	E	sp|Q86B00|GLNA1_DICDI Type-1 glutamine synthetase 1 OS=Dictyostelium discoideum OX=44689 GN=glnA1 PE=3 SV=1	GIL65035.1 hypothetical protein Vafri_18884 [Volvox africanus]
TRINITY_DN100778_c0_g1	640	GO:0044424;GO:0046741;GO:0005515;GO:0043621;GO:0052192;GO:0051814;GO:0051701;GO:0051607;GO:0006952;GO:0050896;GO:0051707;GO:0040011;GO:0044403;GO:0009607;GO:0046794;GO:0002376;GO:1902579;GO:0044766;GO:0005737;GO:0005575;GO:0030246;GO:0005622;GO:0043207;GO:0051704;GO:0002252;GO:0046739;GO:0016032;GO:0009605;GO:0098542;GO:0051234;GO:0052126;GO:0051179;GO:0008150;GO:0044000;GO:0003674;GO:0044419;GO:…	-	PF01419	3I11E	S	sp|Q9SE37|JAL1_ARATH Protein RESTRICTED TEV MOVEMENT 1 OS=Arabidopsis thaliana OX=3702 GN=RTM1 PE=1 SV=1	EOA37122.1 hypothetical protein CARUB_v10010372mg, partial [Capsella rubella]
TRINITY_DN100779_c0_g1	1129	GO:0006807;GO:0032553;GO:0001882;GO:1901363;GO:0006518;GO:0034641;GO:0032549;GO:0010467;GO:0019001;GO:0008152;GO:0006412;GO:0009987;GO:0005488;GO:0000166;GO:0071704;GO:0097367;GO:0035639;GO:0032550;GO:0003723;GO:0032561;GO:0043168;GO:0044237;GO:0003743;GO:0017076;GO:0036094;GO:0006413;GO:0044260;GO:0008135;GO:0043043;GO:0097159;GO:0009058;GO:0001883;GO:0019538;GO:0043170;GO:0044249;GO:1901265;GO:…	K03262	PF01873;PF02020	3GA9X	J	sp|P59325|IF5_MOUSE Eukaryotic translation initiation factor 5 OS=Mus musculus OX=10090 GN=Eif5 PE=1 SV=1	XP_017634909.1 PREDICTED: eukaryotic translation initiation factor 5-like [Gossypium arboreum]
TRINITY_DN100780_c0_g1	675	GO:0006807;GO:0005737;GO:0034641;GO:0006518;GO:0010467;GO:0022626;GO:0043228;GO:0006412;GO:0008152;GO:0009987;GO:0044424;GO:0005623;GO:0044464;GO:0043231;GO:0003735;GO:0031981;GO:0071704;GO:0005198;GO:0043233;GO:0005730;GO:0044445;GO:0043229;GO:0044237;GO:0005575;GO:0005840;GO:0031974;GO:0009536;GO:1990904;GO:0044260;GO:0043043;GO:0009058;GO:0019538;GO:0043170;GO:0070013;GO:0044249;GO:0015934;GO:…	K02889	PF01157	3GBHC	J	sp|Q02753|RL21A_YEAST 60S ribosomal protein L21-A OS=Saccharomyces cerevisiae (strain ATCC 204508 / S288c) OX=559292 GN=RPL21A PE=1 SV=1	XP_023890918.1 60S ribosomal protein L21-A-like [Quercus suber]
TRINITY_DN100781_c0_g1	365	-	-	PF13561	KOG0725	IQ	sp|Q21929|DCXR_CAEEL L-xylulose reductase OS=Caenorhabditis elegans OX=6239 GN=dhs-21 PE=1 SV=2	XP_005647879.1 NAD(P)-binding protein [Coccomyxa subellipsoidea C-169] &gt;EIE23335.1 NAD(P)-binding protein [Coccomyxa subellipsoidea C-169]
TRINITY_DN100782_c0_g1	320	GO:0008514;GO:0005802;GO:0015711;GO:0043231;GO:0044464;GO:0005623;GO:0031410;GO:0000139;GO:0043229;GO:0005215;GO:0015075;GO:0016020;GO:0098791;GO:0015932;GO:0008509;GO:0016021;GO:1901264;GO:0015739;GO:0034220;GO:0097708;GO:0031984;GO:0005737;GO:0022857;GO:0005768;GO:0044424;GO:0031090;GO:0046943;GO:0043226;GO:0044444;GO:0051234;GO:0008150;GO:0051179;GO:1903825;GO:0003674;GO:0031982;GO:1901505;GO:…	K15272	-	3GC1J	G	sp|F4JN00|CSTR4_ARATH CMP-sialic acid transporter 4 OS=Arabidopsis thaliana OX=3702 GN=At4g35335 PE=2 SV=1	XP_018447514.1 PREDICTED: CMP-sialic acid transporter 4 [Raphanus sativus]
TRINITY_DN100783_c0_g1	332	-	-	-	-	-	-	-
TRINITY_DN100784_c0_g1	432	-	K12831	PF00076	34IZA	A	-	GBF87515.1 splicing factor 3B subunit 4 [Raphidocelis subcapitata]
TRINITY_DN100786_c0_g1	584	-	K08245	PF00026	34GVI	O	sp|P42210|ASPR_HORVU Phytepsin OS=Hordeum vulgare OX=4513 PE=1 SV=1	GAX73045.1 hypothetical protein CEUSTIGMA_g498.t1 [Chlamydomonas eustigma]
TRINITY_DN100788_c0_g1	445	-	-	-	-	-	-	-
TRINITY_DN10078_c0_g1	4230	GO:0044271;GO:0016043;GO:0018130;GO:0006283;GO:0003674;GO:0005634;GO:0046483;GO:0009628;GO:0032559;GO:0016462;GO:0071214;GO:0034645;GO:0006281;GO:0050794;GO:0001208;GO:0043167;GO:0034728;GO:0019438;GO:0097159;GO:0009314;GO:2001141;GO:0036094;GO:0005575;GO:0004386;GO:0010468;GO:0019219;GO:0031326;GO:0006325;GO:1901265;GO:0043170;GO:1901362;GO:0050789;GO:0090304;GO:0034644;GO:0051276;GO:0071704;GO:…	K10841	PF00271;PF00176	3HN7H	K	sp|Q9ZV43|CHR8_ARATH Protein CHROMATIN REMODELING 8 OS=Arabidopsis thaliana OX=3702 GN=CHR8 PE=2 SV=1	XP_006299332.1 protein CHROMATIN REMODELING 8 isoform X1 [Capsella rubella] &gt;XP_023641562.1 protein CHROMATIN REMODELING 8 isoform X1 [Capsella rubella] &gt;XP_023641563.1 protein CHROMATIN REMODELING 8 isoform X1 [Capsella rubella] &gt;EOA32230.1 hypothetical protein CARUB_v10015488mg [Capsella rubella]
TRINITY_DN100790_c0_g1	353	-	-	-	-	-	-	-
TRINITY_DN100791_c0_g1	557	GO:0019787;GO:1901564;GO:0008150;GO:0030554;GO:0003674;GO:0032555;GO:0006464;GO:0032559;GO:0004842;GO:0044267;GO:0004674;GO:0043167;GO:0044238;GO:0003824;GO:0097159;GO:0016773;GO:0016310;GO:0044260;GO:0017076;GO:0036094;GO:0032446;GO:1901265;GO:0019538;GO:0043170;GO:0043412;GO:0097367;GO:0035639;GO:0036211;GO:0071704;GO:0000166;GO:0006796;GO:0005488;GO:0016567;GO:0016301;GO:0006950;GO:0070647;GO:…	-	-	3HMCP	T	-	KAF2582199.1 hypothetical protein F2Q68_00000400 [Brassica cretica] &gt;KAF2610763.1 hypothetical protein F2Q70_00007328 [Brassica cretica] &gt;KAF3546093.1 hypothetical protein DY000_02000493 [Brassica cretica]
TRINITY_DN100793_c0_g1	561	-	-	-	-	-	-	-
TRINITY_DN100794_c0_g1	369	-	-	-	-	-	-	-
TRINITY_DN100797_c0_g1	375	GO:0050793;GO:0005506;GO:0036094;GO:0005575;GO:0042303;GO:0004656;GO:0070013;GO:0043170;GO:0019538;GO:0019511;GO:0009790;GO:0050789;GO:0003674;GO:0051094;GO:0046914;GO:0016705;GO:0030246;GO:0044267;GO:0043167;GO:0044422;GO:0044446;GO:0005783;GO:0016491;GO:0005737;GO:0044432;GO:0051213;GO:0008152;GO:0042338;GO:0045927;GO:0018208;GO:0043169;GO:0016701;GO:0018996;GO:0040014;GO:0009653;GO:0071704;GO:…	K00472	-	3GBIY	E	sp|Q8L970|P4H7_ARATH Probable prolyl 4-hydroxylase 7 OS=Arabidopsis thaliana OX=3702 GN=P4H7 PE=2 SV=1	KAG6496902.1 hypothetical protein ZIOFF_044778 [Zingiber officinale]
TRINITY_DN100798_c0_g1	495	-	-	-	3HSQ1	A	-	CAF1697698.1 unnamed protein product [Brassica napus]
TRINITY_DN10079_c0_g1	1881	GO:0071704;GO:0008150;GO:1901564;GO:0036211;GO:0009958;GO:0009630;GO:0009628;GO:0044464;GO:0005623;GO:0016567;GO:0071944;GO:0044237;GO:0009606;GO:0070647;GO:0006464;GO:0009605;GO:0044238;GO:0044267;GO:0009629;GO:0006807;GO:0005575;GO:0044260;GO:0009987;GO:0032446;GO:0008152;GO:0043412;GO:0043170;GO:0050896;GO:0019538	-	PF03000	3HX42	S	sp|O64814|NPY4_ARATH BTB/POZ domain-containing protein NPY4 OS=Arabidopsis thaliana OX=3702 GN=NPY4 PE=2 SV=1	CAE6003541.1 unnamed protein product [Arabidopsis arenosa]
TRINITY_DN10079_c1_g1	2082	GO:0031326;GO:0043227;GO:0007275;GO:0044424;GO:1903506;GO:0010468;GO:0010556;GO:0019219;GO:0009889;GO:0050789;GO:0043169;GO:0019222;GO:0140110;GO:0060255;GO:0051171;GO:0005575;GO:0006355;GO:2001141;GO:0043229;GO:0050794;GO:0003700;GO:0005622;GO:0048856;GO:0046872;GO:0065007;GO:0031323;GO:0043167;GO:0032501;GO:0008150;GO:2000112;GO:0043226;GO:0051252;GO:0005634;GO:0043231;GO:0044464;GO:0005623;GO:…	-	PF03638	3HVUK	P	sp|Q84JZ8|TCX4_ARATH Protein tesmin/TSO1-like CXC 4 OS=Arabidopsis thaliana OX=3702 GN=TCX4 PE=1 SV=1	XP_023642810.1 protein tesmin/TSO1-like CXC 4 isoform X1 [Capsella rubella]
TRINITY_DN1007_c0_g1	5652	GO:1903508;GO:1901360;GO:2000112;GO:0065007;GO:0051716;GO:0004721;GO:0003723;GO:0006351;GO:0043229;GO:0044237;GO:0009755;GO:0051171;GO:0023052;GO:0048522;GO:0006807;GO:0060255;GO:0004647;GO:0032870;GO:0000428;GO:1901363;GO:0006793;GO:0005654;GO:0045935;GO:0071365;GO:0050896;GO:0140096;GO:0097659;GO:0051173;GO:0031325;GO:0009987;GO:0044424;GO:0008420;GO:0016787;GO:0007275;GO:0032774;GO:1901576;GO:…	K18998	PF03919;PF00782;PF01331	3HRGR	K	sp|Q5YDB5|CPL2_ARATH RNA polymerase II C-terminal domain phosphatase-like 2 OS=Arabidopsis thaliana OX=3702 GN=CPL2 PE=1 SV=3	XP_020876845.1 RNA polymerase II C-terminal domain phosphatase-like 2 [Arabidopsis lyrata subsp. lyrata]
TRINITY_DN1007_c0_g2	3064	GO:0006397;GO:1901360;GO:0000166;GO:0035639;GO:0032550;GO:0097367;GO:0004721;GO:0098501;GO:0065007;GO:0032561;GO:0044237;GO:0043229;GO:0016740;GO:0016817;GO:0006807;GO:0060255;GO:0008192;GO:0032553;GO:0004484;GO:0006793;GO:1901363;GO:0140096;GO:0032549;GO:0070568;GO:0006396;GO:0016787;GO:0044424;GO:0009987;GO:0032555;GO:0004651;GO:0008150;GO:1901564;GO:0006725;GO:0043226;GO:0016791;GO:0016818;GO:…	K13917	PF00782;PF01331	3HT8R	A	sp|Q6NY98|MCE1_DANRE mRNA-capping enzyme OS=Danio rerio OX=7955 GN=rngtt PE=2 SV=1	KAF3606661.1 hypothetical protein DY000_02051113 [Brassica cretica]
TRINITY_DN1007_c3_g1	436	-	-	-	-	-	-	-
TRINITY_DN100803_c0_g1	414	-	-	-	-	-	-	-
TRINITY_DN100804_c0_g1	527	-	-	PF12796	-	-	-	-
TRINITY_DN100805_c0_g1	331	-	K07198	-	3GYU2	T	sp|O14408|KCC1_METAN Calcium/calmodulin-dependent protein kinase OS=Metarhizium anisopliae OX=5530 PE=2 SV=1	XP_023901494.1 calcium/calmodulin-dependent protein kinase cmkA-like [Quercus suber]
TRINITY_DN100806_c0_g1	1836	-	-	-	-	-	-	CAE6099218.1 unnamed protein product [Arabidopsis arenosa]
TRINITY_DN100808_c0_g1	645	GO:0005575;GO:0022607;GO:0005773;GO:0099513;GO:0005884;GO:0071840;GO:0097435;GO:0043227;GO:0005515;GO:0003674;GO:0003779;GO:0008092;GO:0008150;GO:0051639;GO:0043226;GO:0043232;GO:0016043;GO:0044444;GO:0044422;GO:0044446;GO:0044430;GO:0043167;GO:0007015;GO:0051017;GO:0005622;GO:0048511;GO:0046872;GO:0030036;GO:0005737;GO:0051015;GO:0061572;GO:0044877;GO:0043228;GO:0043169;GO:0099512;GO:0099081;GO:…	K17275	PF00307	3HZNH	Z	sp|P54680|FIMB_DICDI Fimbrin OS=Dictyostelium discoideum OX=44689 GN=fimA PE=2 SV=2	XP_021906098.1 fimbrin-1-like isoform X1 [Carica papaya]
TRINITY_DN10080_c0_g1	1426	-	-	-	3HU9E	S	sp|Q0C0V9|TATB_HYPNA Sec-independent protein translocase protein TatB OS=Hyphomonas neptunium (strain ATCC 15444) OX=228405 GN=tatB PE=3 SV=1	XP_010481837.1 PREDICTED: uncharacterized protein LOC104760588 isoform X1 [Camelina sativa]
TRINITY_DN100810_c0_g1	1293	GO:0005694;GO:0043228;GO:0009295;GO:0043227;GO:0042646;GO:0000229;GO:0044424;GO:0005575;GO:0009536;GO:0005737;GO:1901363;GO:0003677;GO:0097159;GO:0044446;GO:0009532;GO:0044422;GO:0003676;GO:0043229;GO:0044435;GO:0005622;GO:0005623;GO:0044464;GO:0005488;GO:0043231;GO:0003674;GO:0009507;GO:0003697;GO:0009508;GO:0044444;GO:0043232;GO:0043226	-	-	3HWCN	L	sp|Q9FYJ2|OSB4_ARATH Protein OSB4, chloroplastic OS=Arabidopsis thaliana OX=3702 GN=OSB4 PE=2 SV=1	CAE5958951.1 unnamed protein product [Arabidopsis arenosa]
TRINITY_DN100814_c0_g1	310	-	-	-	-	-	-	-
TRINITY_DN100816_c0_g1	327	-	-	-	-	-	-	-
TRINITY_DN100817_c0_g1	743	-	-	-	-	-	-	-
TRINITY_DN100818_c0_g1	361	GO:0043412;GO:0010467;GO:0043170;GO:0019538;GO:0007275;GO:0044424;GO:0009987;GO:0008152;GO:0048229;GO:0006807;GO:0005737;GO:0005575;GO:0009553;GO:0044260;GO:0009058;GO:0003824;GO:0051604;GO:0044238;GO:0018193;GO:0044267;GO:0044237;GO:0034038;GO:0048856;GO:0016740;GO:0016765;GO:0005622;GO:0006464;GO:0005623;GO:0044464;GO:0032502;GO:0018205;GO:0003674;GO:0071704;GO:0032501;GO:1901564;GO:0036211;GO:…	K00809	PF01916	4JE2J	O	sp|Q9AXQ8|DHYS_DIACA Deoxyhypusine synthase OS=Dianthus caryophyllus OX=3570 GN=DHS PE=2 SV=1	XP_011655260.1 deoxyhypusine synthase isoform X1 [Cucumis sativus] &gt;XP_031742097.1 deoxyhypusine synthase isoform X1 [Cucumis sativus] &gt;KGN51117.1 hypothetical protein Csa_007880 [Cucumis sativus]
TRINITY_DN100822_c0_g1	406	-	-	-	-	-	-	-
TRINITY_DN100823_c0_g1	397	-	-	-	-	-	-	-
TRINITY_DN100824_c0_g1	390	GO:0006807;GO:0005737;GO:0034641;GO:0006518;GO:0043228;GO:0043169;GO:0010467;GO:0044424;GO:0009987;GO:0006412;GO:0008152;GO:0003735;GO:0005488;GO:0005623;GO:0044464;GO:0005198;GO:0071704;GO:0044237;GO:0043229;GO:0044260;GO:1990904;GO:0005840;GO:0005575;GO:0009058;GO:0043043;GO:0043170;GO:0019538;GO:0043604;GO:0044249;GO:1901576;GO:0003674;GO:0009059;GO:0043226;GO:0043232;GO:0044271;GO:0043603;GO:…	K02921	-	34I6Q	J	sp|Q9VMU4|RL37A_DROME 60S ribosomal protein L37a OS=Drosophila melanogaster OX=7227 GN=RpL37A PE=1 SV=3	KAG1667059.1 hypothetical protein FOA52_000422 [Chlamydomonas sp. UWO 241]
TRINITY_DN100826_c0_g1	481	-	-	-	-	-	sp|Q0BPZ0|RS6_GRABC 30S ribosomal protein S6 OS=Granulibacter bethesdensis (strain ATCC BAA-1260 / CGDNIH1) OX=391165 GN=rpsF PE=3 SV=1	-
TRINITY_DN10082_c0_g1	1462	GO:0003674;GO:0052689;GO:0006950;GO:0005575;GO:1901575;GO:0071704;GO:0002213;GO:0005576;GO:0008150;GO:0009056;GO:0006952;GO:0044238;GO:0016788;GO:0050896;GO:0016298;GO:0016042;GO:0003824;GO:0008152;GO:0004806;GO:0006629;GO:0016787	-	-	3HXHT	I	sp|Q67ZU1|LIP2_ARATH Triacylglycerol lipase 2 OS=Arabidopsis thaliana OX=3702 GN=LIP2 PE=2 SV=1	XP_006399929.2 triacylglycerol lipase 2 [Eutrema salsugineum]
TRINITY_DN100831_c0_g1	325	-	-	-	3HQAX	S	-	-
TRINITY_DN100834_c0_g1	475	GO:0016740;GO:0005524;GO:0043168;GO:0043229;GO:0044435;GO:0044237;GO:0009532;GO:0035639;GO:0097367;GO:0071704;GO:0044281;GO:0000166;GO:0016301;GO:0044464;GO:0005623;GO:0006796;GO:0005488;GO:0043231;GO:0008152;GO:0044424;GO:0008144;GO:0009987;GO:0009570;GO:0016772;GO:0043169;GO:0016781;GO:1901363;GO:0006793;GO:0032553;GO:0032787;GO:0005737;GO:0046872;GO:0032559;GO:0005622;GO:0043167;GO:0044446;GO:…	-	-	3HMRI	F	-	-
TRINITY_DN100835_c0_g1	337	-	K19944	PF00566	4JHHJ	S	sp|Q9VYY9|EVI5_DROME Ecotropic viral integration site 5 ortholog OS=Drosophila melanogaster OX=7227 GN=Evi5 PE=1 SV=3	XP_008357809.2 EVI5-like protein [Malus domestica]
TRINITY_DN100836_c0_g1	1530	GO:0097159;GO:1901363;GO:0034641;GO:0004519;GO:0009451;GO:0005575;GO:0006807;GO:0008152;GO:0044424;GO:0009987;GO:0043227;GO:0016070;GO:0016787;GO:0043170;GO:0006139;GO:0016788;GO:0043412;GO:0090304;GO:0043226;GO:0006725;GO:0008150;GO:0071704;GO:0003674;GO:0004518;GO:1901360;GO:0005488;GO:0046483;GO:0044464;GO:0005623;GO:0043231;GO:0005622;GO:0003676;GO:0090305;GO:0044237;GO:0043229;GO:0044238;GO:…	-	PF12854;PF01535;PF13812;PF13041	3HSZ0	S	sp|Q7X6A5|PPR81_ARATH Pentatricopeptide repeat-containing protein At1g55630 OS=Arabidopsis thaliana OX=3702 GN=At1g55630 PE=2 SV=1	XP_023645421.1 pentatricopeptide repeat-containing protein At1g55630 [Capsella rubella]
TRINITY_DN100837_c0_g1	331	-	K02739	-	34HA6	O	sp|O23710|PSB7A_ARATH Proteasome subunit beta type-7-A OS=Arabidopsis thaliana OX=3702 GN=PBB1 PE=1 SV=2	XP_013898184.1 20S proteasome subunit beta 2 [Monoraphidium neglectum] &gt;KIY99164.1 20S proteasome subunit beta 2 [Monoraphidium neglectum]
TRINITY_DN10083_c0_g1	4050	GO:0043167;GO:0044238;GO:0003824;GO:0003723;GO:0046872;GO:0005622;GO:0003676;GO:0090305;GO:0043229;GO:0044237;GO:0003674;GO:0004518;GO:1901360;GO:0005623;GO:0046483;GO:0044464;GO:0005488;GO:0046914;GO:0005739;GO:0043231;GO:0044444;GO:0006725;GO:0090304;GO:0043226;GO:0008150;GO:0071704;GO:0043169;GO:0043170;GO:0006139;GO:0016788;GO:0043412;GO:0008152;GO:0009987;GO:0044424;GO:0016070;GO:0043227;GO:…	-	PF20431;PF01535;PF14432;PF13041	3HRUN	S	sp|Q9LYV3|PP377_ARATH Putative pentatricopeptide repeat-containing protein At5g13230, mitochondrial OS=Arabidopsis thaliana OX=3702 GN=PCMP-H89 PE=3 SV=1	XP_006399813.1 putative pentatricopeptide repeat-containing protein At5g13230, mitochondrial [Eutrema salsugineum] &gt;ESQ41266.1 hypothetical protein EUTSA_v10012703mg [Eutrema salsugineum]
TRINITY_DN10083_c1_g1	2657	GO:0090304;GO:0006725;GO:0043226;GO:0071704;GO:0008150;GO:1901360;GO:0003674;GO:0004518;GO:0046914;GO:0043231;GO:0046483;GO:0005488;GO:0044464;GO:0005623;GO:0005622;GO:0046872;GO:0090305;GO:0043229;GO:0044237;GO:0003676;GO:0044238;GO:0043167;GO:0003723;GO:0003824;GO:0034641;GO:0097159;GO:1901363;GO:0004519;GO:0008270;GO:0009451;GO:0006807;GO:0005575;GO:0044424;GO:0009987;GO:0008152;GO:0016070;GO:…	-	PF01535;PF20431;PF14432;PF13041	3HQQM	S	sp|Q9SHZ8|PP168_ARATH Pentatricopeptide repeat-containing protein At2g22070 OS=Arabidopsis thaliana OX=3702 GN=PCMP-H41 PE=3 SV=1	EOA28947.1 hypothetical protein CARUB_v10025197mg [Capsella rubella]
TRINITY_DN100840_c0_g1	567	-	-	-	-	-	-	-
TRINITY_DN100842_c0_g1	312	-	-	-	KOG0192	KLT	sp|Q16584|M3K11_HUMAN Mitogen-activated protein kinase kinase kinase 11 OS=Homo sapiens OX=9606 GN=MAP3K11 PE=1 SV=1	KAF6263821.1 kinase-like domain-containing protein [Scenedesmus sp. NREL 46B-D3]
TRINITY_DN100847_c0_g1	301	GO:0016020;GO:0044237;GO:0043229;GO:0005524;GO:0043168;GO:0016740;GO:0055044;GO:0043231;GO:0016301;GO:0005488;GO:0044464;GO:0005623;GO:0006796;GO:0000166;GO:0071944;GO:0071704;GO:0036211;GO:0035639;GO:0097367;GO:0140096;GO:0031090;GO:0016772;GO:0004672;GO:0006468;GO:0044424;GO:0009987;GO:0008144;GO:0008152;GO:0006807;GO:0005737;GO:0032553;GO:0006793;GO:0016021;GO:1901363;GO:0044422;GO:0098588;GO:…	-	-	3HZ2T	T	sp|Q9LVI6|RLK90_ARATH Probable inactive receptor kinase RLK902 OS=Arabidopsis thaliana OX=3702 GN=RLK902 PE=1 SV=1	XP_010465843.1 PREDICTED: probable inactive receptor kinase RLK902 [Camelina sativa]
TRINITY_DN100848_c0_g1	344	-	-	-	-	-	-	XP_023910350.1 uncharacterized protein YKR070W-like [Quercus suber]
TRINITY_DN100849_c0_g1	615	-	-	-	-	-	-	-
TRINITY_DN10084_c0_g1	2048	GO:0022607;GO:0031974;GO:0005575;GO:0032506;GO:0070013;GO:0005875;GO:0000281;GO:0000912;GO:0005819;GO:0071840;GO:0000278;GO:1902410;GO:0043227;GO:1903047;GO:0005634;GO:0043226;GO:0043232;GO:0016043;GO:0044444;GO:0051301;GO:0008150;GO:0044430;GO:0044422;GO:0032991;GO:0044446;GO:0005622;GO:0044428;GO:0005737;GO:0009574;GO:0061640;GO:0043228;GO:0015630;GO:0009987;GO:0000911;GO:0044424;GO:0007049;GO:…	K18636	-	3HU4C	S	sp|Q197W8|TANA_ARATH Microtubule-binding protein TANGLED OS=Arabidopsis thaliana OX=3702 GN=TAN PE=1 SV=1	CAD5322145.1 unnamed protein product [Arabidopsis thaliana]
TRINITY_DN100850_c0_g1	329	GO:0043229;GO:0005811;GO:0044424;GO:0005622;GO:0012511;GO:0016020;GO:0043228;GO:0031224;GO:0044425;GO:0016021;GO:0043232;GO:0043226;GO:0044464;GO:0005623;GO:0005575	-	-	3I07F	S	sp|A6MGW7|OLE_LILLO Oleosin OS=Lilium longiflorum OX=4690 PE=1 SV=1	XP_010465964.1 PREDICTED: oleosin 1-like [Camelina sativa]
TRINITY_DN100852_c0_g1	492	-	-	-	-	-	-	-
TRINITY_DN10085_c0_g1	1289	-	-	PF08241	-	-	-	XP_020873709.1 uncharacterized protein LOC9303617 [Arabidopsis lyrata subsp. lyrata] &gt;EFH45852.1 hypothetical protein ARALYDRAFT_492129 [Arabidopsis lyrata subsp. lyrata]
TRINITY_DN100860_c0_g1	849	GO:0042788;GO:0043233;GO:0016020;GO:0031981;GO:0071704;GO:0005198;GO:0090304;GO:0044085;GO:0042273;GO:0044464;GO:0005488;GO:0005623;GO:0043231;GO:0016070;GO:0006412;GO:0008152;GO:0010467;GO:0022626;GO:0006139;GO:0006518;GO:0034641;GO:0022613;GO:0005737;GO:0034645;GO:0044428;GO:0044446;GO:0044422;GO:0098588;GO:0032991;GO:1901566;GO:0044267;GO:0043603;GO:0044271;GO:0046483;GO:0005829;GO:0005634;GO:…	K02936	PF01248	3G7AX	J	sp|O57592|RL7A_TAKRU 60S ribosomal protein L7a OS=Takifugu rubripes OX=31033 GN=rpl7a PE=3 SV=3	XP_015865869.1 60S ribosomal protein L7a-1 [Ziziphus jujuba] &gt;XP_015893955.1 60S ribosomal protein L7a-1 [Ziziphus jujuba]
TRINITY_DN100864_c0_g1	308	-	-	-	-	-	sp|P40319|ELO3_YEAST Elongation of fatty acids protein 3 OS=Saccharomyces cerevisiae (strain ATCC 204508 / S288c) OX=559292 GN=ELO3 PE=1 SV=1	XP_023871174.1 putative elongation of fatty acids protein 1 [Quercus suber]
TRINITY_DN100866_c0_g1	313	-	-	-	-	-	-	-
TRINITY_DN100867_c0_g1	447	-	-	-	-	-	-	-
TRINITY_DN100868_c0_g1	790	-	-	PF05013	-	-	-	-
TRINITY_DN100869_c0_g1	1431	GO:0032553;GO:0009755;GO:0006807;GO:0023052;GO:0048522;GO:0006793;GO:0009814;GO:1901363;GO:0032870;GO:0048584;GO:0050896;GO:0140096;GO:0009617;GO:1900457;GO:0009987;GO:0002218;GO:0060089;GO:0045087;GO:0004672;GO:0000166;GO:0042742;GO:0006950;GO:0016301;GO:0097367;GO:0035639;GO:0071383;GO:0051716;GO:0050778;GO:0065007;GO:0002758;GO:0038023;GO:0016740;GO:0044237;GO:0048583;GO:0009967;GO:0044260;GO:…	K13430	PF00069	3HWUC	T	sp|Q9LSE1|CDG1_ARATH Serine/threonine-protein kinase CDG1 OS=Arabidopsis thaliana OX=3702 GN=CDG1 PE=1 SV=1	CAF2004783.1 unnamed protein product [Brassica napus] &gt;CDY52409.1 BnaC07g49080D [Brassica napus]
TRINITY_DN10086_c0_g1	929	GO:0071704;GO:0036211;GO:1901575;GO:0043632;GO:0005488;GO:0016567;GO:0044237;GO:0070647;GO:0016740;GO:1901565;GO:0016020;GO:0009056;GO:0061659;GO:0044265;GO:0061630;GO:0016021;GO:0030163;GO:0051603;GO:0006807;GO:0009057;GO:0009987;GO:0008152;GO:0140096;GO:0043169;GO:0008150;GO:1901564;GO:0019787;GO:0019941;GO:0010498;GO:0003674;GO:0004842;GO:0046872;GO:0043161;GO:0006464;GO:0003824;GO:0044238;GO:…	-	PF13639	3HTMP	O	sp|O82353|ATL67_ARATH RING-H2 finger protein ATL67 OS=Arabidopsis thaliana OX=3702 GN=ATL67 PE=2 SV=1	VVB13855.1 unnamed protein product [Arabis nemorensis]
TRINITY_DN100870_c0_g1	451	-	-	-	-	-	-	-
TRINITY_DN100874_c0_g1	454	GO:0016758;GO:0071704;GO:0036211;GO:0071944;GO:0043231;GO:0009100;GO:0005623;GO:0044464;GO:0016740;GO:0044237;GO:0043229;GO:0006486;GO:0018193;GO:0016020;GO:0043413;GO:0016021;GO:0005783;GO:0006487;GO:0098796;GO:0031984;GO:1901135;GO:0006807;GO:0044432;GO:0005737;GO:0009987;GO:0044424;GO:0008152;GO:0009101;GO:0018196;GO:0004579;GO:0043226;GO:0044444;GO:0008150;GO:1901564;GO:1901576;GO:0003674;GO:…	K07151	-	3IEQK	O	sp|Q7XQ88|STT3B_ORYSJ Dolichyl-diphosphooligosaccharide--protein glycosyltransferase subunit STT3B OS=Oryza sativa subsp. japonica OX=39947 GN=STT3B PE=2 SV=2	XP_019091740.1 PREDICTED: dolichyl-diphosphooligosaccharide--protein glycosyltransferase subunit STT3B-like [Camelina sativa]
TRINITY_DN100875_c0_g1	320	-	-	-	-	-	-	-
TRINITY_DN100877_c0_g1	790	-	-	-	-	-	-	GBG00611.1 hypothetical protein Rsub_13319 [Raphidocelis subcapitata]
TRINITY_DN100878_c0_g1	698	GO:1990234;GO:0044260;GO:0005575;GO:0032446;GO:0005515;GO:0043227;GO:0043170;GO:0019538;GO:0043412;GO:0043226;GO:0031625;GO:0019787;GO:1901564;GO:0008150;GO:0003674;GO:0005634;GO:0005622;GO:0004842;GO:0006464;GO:0044389;GO:0046872;GO:0044238;GO:0043167;GO:0044267;GO:0032991;GO:0003824;GO:1902494;GO:0005737;GO:0006807;GO:0009987;GO:0044424;GO:0008152;GO:0019899;GO:0043169;GO:0140096;GO:0071704;GO:…	-	-	3KRIY	O	-	-
TRINITY_DN100879_c0_g1	501	-	K02923	-	34MX3	J	sp|Q9W5N2|RL38_DROME 60S ribosomal protein L38 OS=Drosophila melanogaster OX=7227 GN=RpL38 PE=1 SV=1	KAF8071164.1 SOL1 [Scenedesmus sp. PABB004]
TRINITY_DN10087_c0_g1	1462	GO:0060627;GO:0044093;GO:0005488;GO:0005623;GO:0044464;GO:0043085;GO:0033043;GO:0005096;GO:0065007;GO:0006886;GO:0042886;GO:0030695;GO:0008104;GO:0051345;GO:0015833;GO:0070727;GO:0051641;GO:0060589;GO:0015031;GO:0019899;GO:0046907;GO:0043169;GO:0033036;GO:0005509;GO:0051234;GO:0051649;GO:0008150;GO:0051179;GO:0051128;GO:0003674;GO:0030234;GO:0031267;GO:0006810;GO:0050790;GO:0005622;GO:0071705;GO:…	-	PF00566	3HTCV	U	-	XP_024003920.1 ecotropic viral integration site 5 protein homolog [Eutrema salsugineum]
TRINITY_DN10087_c1_g1	333	-	-	-	-	-	-	-
TRINITY_DN100881_c0_g1	301	-	-	-	-	-	-	-
TRINITY_DN100883_c0_g1	807	GO:0043228;GO:0090502;GO:0006396;GO:0033036;GO:0006403;GO:0044424;GO:0009987;GO:0046907;GO:0015833;GO:0070727;GO:0006807;GO:0050657;GO:0000028;GO:0008104;GO:0000479;GO:0000447;GO:0034622;GO:0006364;GO:0006886;GO:0006996;GO:0044237;GO:0043229;GO:0030684;GO:1901360;GO:0006913;GO:0003735;GO:0042254;GO:0000478;GO:0071426;GO:0051029;GO:0043933;GO:0051168;GO:0071428;GO:0071840;GO:0045184;GO:0034613;GO:…	K02998	PF00318	3HP35	J	sp|O80377|RSSA_DAUCA 40S ribosomal protein SA OS=Daucus carota OX=4039 GN=179B PE=2 SV=1	XP_024972740.1 40S ribosomal protein SA-like [Cynara cardunculus var. scolymus] &gt;KVH98670.1 Ribosomal protein S2 [Cynara cardunculus var. scolymus]
TRINITY_DN100884_c0_g1	334	-	-	-	-	-	sp|P24076|BGIA_MOMCH Glu S.griseus protease inhibitor OS=Momordica charantia OX=3673 PE=1 SV=1	XP_010442010.1 PREDICTED: inhibitor of trypsin and hageman factor [Camelina sativa]
TRINITY_DN100885_c0_g1	412	-	-	-	-	-	-	-
TRINITY_DN100887_c0_g1	1342	GO:0043229;GO:0044435;GO:0044237;GO:0043168;GO:0016740;GO:0009526;GO:0009532;GO:0006782;GO:0030170;GO:0071704;GO:0042440;GO:0015994;GO:0048037;GO:0016769;GO:0043231;GO:0005488;GO:0044464;GO:0005623;GO:1901360;GO:0009570;GO:0048046;GO:0044424;GO:0008144;GO:0009987;GO:0008152;GO:0031975;GO:0016853;GO:0005576;GO:0034641;GO:0051188;GO:1901363;GO:0005737;GO:0006807;GO:0009941;GO:0016866;GO:0015995;GO:…	K01845	PF00202	3HWTZ	E	sp|Q42522|GSA2_ARATH Glutamate-1-semialdehyde 2,1-aminomutase 2, chloroplastic OS=Arabidopsis thaliana OX=3702 GN=GSA2 PE=1 SV=2	XP_006404223.1 glutamate-1-semialdehyde 2,1-aminomutase 2, chloroplastic [Eutrema salsugineum] &gt;ESQ45676.1 hypothetical protein EUTSA_v10010337mg [Eutrema salsugineum]
TRINITY_DN100888_c0_g1	344	-	K09527	-	34PD4	O	sp|Q70WY6|DNAJ_FUSNP Chaperone protein DnaJ OS=Fusobacterium nucleatum subsp. polymorphum OX=76857 GN=dnaJ PE=3 SV=1	GFH16717.1 J domain-containing protein [Haematococcus lacustris]
TRINITY_DN100889_c0_g1	747	GO:0080032;GO:0003674;GO:0052689;GO:0016788;GO:0003824;GO:0016787	-	PF12697	3HTHD	S	sp|Q8S9K8|MES10_ARATH Methylesterase 10 OS=Arabidopsis thaliana OX=3702 GN=MES10 PE=2 SV=1	OAP05689.1 MES10 [Arabidopsis thaliana]
TRINITY_DN10088_c0_g1	390	-	-	-	-	-	-	KAF1857267.1 hypothetical protein Lal_00014498 [Lupinus albus]
TRINITY_DN10088_c0_g2	1322	-	-	-	4JWBW	S	-	PLY97102.1 hypothetical protein LSAT_4X50261 [Lactuca sativa]
TRINITY_DN100892_c0_g1	552	GO:0030163;GO:0044265;GO:0006511;GO:0044260;GO:0005575;GO:0051603;GO:0006807;GO:0009057;GO:0008152;GO:0006508;GO:0009987;GO:0044424;GO:0032446;GO:0043227;GO:0019538;GO:0044257;GO:0043170;GO:0043412;GO:0019941;GO:0043226;GO:1901575;GO:0036211;GO:1901564;GO:0008150;GO:0071704;GO:0044464;GO:0005623;GO:0016567;GO:0005634;GO:0043231;GO:0043632;GO:1901565;GO:0006464;GO:0005622;GO:0070647;GO:0043229;GO:…	K03094	PF03931;PF01466	3HTG1	O	sp|Q9SY65|ASK18_ARATH SKP1-like protein 18 OS=Arabidopsis thaliana OX=3702 GN=ASK18 PE=1 SV=2	XP_006305612.2 SKP1-like protein 18 [Capsella rubella]
TRINITY_DN100893_c0_g1	421	-	K13412	-	34JSH	T	sp|Q39016|CDPKB_ARATH Calcium-dependent protein kinase 11 OS=Arabidopsis thaliana OX=3702 GN=CPK11 PE=1 SV=2	KAF8073021.1 ARF1 [Scenedesmus sp. PABB004]
TRINITY_DN100899_c0_g1	433	-	-	-	-	-	-	-
TRINITY_DN10089_c0_g1	434	GO:0050794;GO:0034645;GO:0046872;GO:0005622;GO:0031323;GO:0043167;GO:0044238;GO:0008150;GO:0018130;GO:0051252;GO:0006725;GO:0043226;GO:0044271;GO:0046483;GO:0005634;GO:0009059;GO:0032774;GO:0003674;GO:1901576;GO:0080090;GO:0044249;GO:0031326;GO:0043227;GO:0010468;GO:1903506;GO:0019219;GO:0050789;GO:1901362;GO:0043170;GO:0019222;GO:0009058;GO:0019438;GO:0034654;GO:0005575;GO:0044260;GO:2001141;GO:…	-	-	3HT61	K	sp|Q9C810|Y1342_ARATH PHD finger protein At1g33420 OS=Arabidopsis thaliana OX=3702 GN=At1g33420 PE=1 SV=1	XP_006415087.1 PHD finger protein At1g33420 [Eutrema salsugineum] &gt;ESQ33440.1 hypothetical protein EUTSA_v10006958mg [Eutrema salsugineum]
TRINITY_DN1008_c0_g1	1438	GO:0044249;GO:0031326;GO:0043227;GO:0019219;GO:1903506;GO:0010468;GO:0050789;GO:1901362;GO:0043170;GO:0019222;GO:0003677;GO:0097159;GO:0009058;GO:0019438;GO:0005575;GO:0034654;GO:2001141;GO:0044260;GO:0006355;GO:0050794;GO:0003676;GO:0034645;GO:0005622;GO:0031323;GO:0044238;GO:0008150;GO:0018130;GO:0051252;GO:0044271;GO:0043226;GO:0006725;GO:0046483;GO:0005634;GO:0009059;GO:0032774;GO:0003674;GO:…	K09422	-	3HTQK	K	sp|P80073|MYB2_PHYPA Myb-related protein Pp2 OS=Physcomitrium patens OX=3218 GN=PP2 PE=2 SV=1	CAE6101062.1 unnamed protein product [Arabidopsis arenosa]
TRINITY_DN100902_c0_g1	1700	GO:0070482;GO:0071248;GO:0005506;GO:0004497;GO:0005575;GO:0097159;GO:0009058;GO:0044425;GO:0043167;GO:0031224;GO:0003824;GO:0046872;GO:0016709;GO:0033554;GO:0003674;GO:0016705;GO:0009628;GO:0046914;GO:0008150;GO:0043169;GO:0050896;GO:0010038;GO:0055114;GO:0070887;GO:0001666;GO:0008152;GO:0071453;GO:0071241;GO:0009987;GO:0042221;GO:0044550;GO:1901363;GO:0036293;GO:0016021;GO:0071281;GO:0016491;GO:…	K00517	PF00067	3HQ58	Q	sp|Q9SZ46|C82C4_ARATH Xanthotoxin 5-hydroxylase CYP82C4 OS=Arabidopsis thaliana OX=3702 GN=CYP82C4 PE=1 SV=1	KAF3547016.1 hypothetical protein DY000_02010140 [Brassica cretica]
TRINITY_DN100908_c0_g1	387	-	-	-	-	-	-	-
TRINITY_DN10090_c0_g1	1117	-	-	-	-	-	sp|P27483|GRP1_ARATH Glycine-rich cell wall structural protein OS=Arabidopsis thaliana OX=3702 GN=At3g17050 PE=3 SV=2	CAA7015616.1 unnamed protein product [Microthlaspi erraticum]
TRINITY_DN100911_c0_g1	367	-	-	-	-	-	-	-
TRINITY_DN100912_c0_g1	428	-	-	-	-	-	-	-
TRINITY_DN100914_c0_g1	366	-	-	-	-	-	-	-
TRINITY_DN100917_c0_g1	311	-	K00264	PF00310	34GWT	E	sp|Q0JKD0|GLT1_ORYSJ Glutamate synthase 1 [NADH], chloroplastic OS=Oryza sativa subsp. japonica OX=39947 GN=Os01g0681900 PE=2 SV=1	KAF6263375.1 hypothetical protein COO60DRAFT_459133 [Scenedesmus sp. NREL 46B-D3]
TRINITY_DN100919_c0_g1	405	GO:0044238;GO:0000323;GO:0043229;GO:0043227;GO:0006629;GO:0008152;GO:0044424;GO:0005622;GO:0044464;GO:0005575;GO:0005623;GO:0043231;GO:0005737;GO:0005773;GO:0005764;GO:0008150;GO:0071704;GO:0044444;GO:0043226	K12348	PF15508	2QT7H	S	sp|Q6P7S1|ASAH1_RAT Acid ceramidase OS=Rattus norvegicus OX=10116 GN=Asah1 PE=1 SV=1	XP_002502790.1 predicted protein [Micromonas commoda] &gt;ACO64048.1 predicted protein [Micromonas commoda]
TRINITY_DN10091_c0_g1	1547	-	K15032	PF02536	3HS7T	K	-	XP_006287701.1 uncharacterized protein LOC17883245 [Capsella rubella] &gt;EOA20599.1 hypothetical protein CARUB_v10000909mg [Capsella rubella]
TRINITY_DN100922_c0_g1	463	-	-	-	-	-	-	-
TRINITY_DN100923_c0_g1	707	-	K02987	PF00467;PF01479;PF08071;PF00900;PF16121	34H2C	J	sp|P47836|RS4_CHICK 40S ribosomal protein S4 OS=Gallus gallus OX=9031 GN=RPS4 PE=2 SV=2	KAF6257032.1 component of cytosolic 80S ribosome and 40S small subunit [Scenedesmus sp. NREL 46B-D3]
TRINITY_DN100926_c0_g1	322	-	-	-	-	-	-	KAF8072650.1 hypothetical protein HT031_000310 [Scenedesmus sp. PABB004]
TRINITY_DN100929_c0_g1	429	-	K02953	PF00312;PF08069	3GBY4	J	sp|P59223|RS131_ARATH 40S ribosomal protein S13-1 OS=Arabidopsis thaliana OX=3702 GN=RPS13A PE=2 SV=1	XP_020165017.1 uncharacterized protein LOC109750469 [Aegilops tauschii subsp. strangulata]
TRINITY_DN10092_c0_g1	1227	-	-	PF00314	3HRK8	T	sp|Q53MB8|TLPH_ORYSJ Thaumatin-like protein OS=Oryza sativa subsp. japonica OX=39947 GN=Os11g0706600 PE=2 SV=1	VYS65598.1 unnamed protein product [Arabidopsis thaliana]
TRINITY_DN100932_c0_g1	319	-	-	-	-	-	-	-
TRINITY_DN10093_c0_g1	1294	GO:0044238;GO:0043167;GO:0044267;GO:0003824;GO:0070647;GO:0016740;GO:0006464;GO:0046872;GO:0044237;GO:0003676;GO:0003674;GO:0016567;GO:0005488;GO:0071704;GO:1901564;GO:0036211;GO:0008150;GO:0043170;GO:0019538;GO:0043169;GO:0043412;GO:0032446;GO:0009987;GO:0008152;GO:0044260;GO:0006807;GO:0003677;GO:0097159;GO:1901363	K15687	PF00097	3HWIC	O	sp|Q6IDS6|C3H35_ARATH E3 ubiquitin-protein ligase makorin OS=Arabidopsis thaliana OX=3702 GN=MKRN PE=2 SV=1	NP_001325802.1 zinc finger (CCCH-type/C3HC4-type RING finger) family protein [Arabidopsis thaliana] &gt;NP_850540.1 zinc finger (CCCH-type/C3HC4-type RING finger) family protein [Arabidopsis thaliana] &gt;NP_974255.1 zinc finger (CCCH-type/C3HC4-type RING finger) family protein [Arabidopsis thaliana] &gt;Q6IDS6.1 RecName: Full=E3 ubiquitin-protein ligase makorin; AltName: Full=RING-type E3 ubiqui…
TRINITY_DN100940_c0_g1	406	-	-	-	-	-	-	-
TRINITY_DN100943_c0_g1	328	GO:0055044;GO:0060548;GO:0043168;GO:0016020;GO:0065007;GO:0010941;GO:0071944;GO:0090066;GO:0006950;GO:0001101;GO:0005488;GO:0005623;GO:0044464;GO:0010035;GO:0009987;GO:0042221;GO:0045793;GO:0048519;GO:0050896;GO:0032535;GO:0009270;GO:0065008;GO:0005543;GO:0050794;GO:0043167;GO:0030054;GO:0016043;GO:0009266;GO:0008150;GO:0003674;GO:0009628;GO:0048523;GO:0006952;GO:0005911;GO:0009506;GO:0008361;GO:…	-	-	3HWBD	T	sp|Q5S1W2|BON2_ARATH Protein BONZAI 2 OS=Arabidopsis thaliana OX=3702 GN=BON2 PE=1 SV=2	XP_009122353.2 protein BONZAI 2 [Brassica rapa]
TRINITY_DN100944_c0_g1	586	GO:0032550;GO:0035639;GO:0097367;GO:0005525;GO:0000166;GO:0003674;GO:0071944;GO:0032555;GO:0044464;GO:0005623;GO:0005488;GO:0016462;GO:0016817;GO:0043168;GO:0016020;GO:0032561;GO:0043167;GO:0016818;GO:0003824;GO:0017111;GO:0097159;GO:0001882;GO:1901363;GO:0032553;GO:0017076;GO:0036094;GO:0005575;GO:0003924;GO:1901265;GO:0016787;GO:0019001;GO:0001883;GO:0005886;GO:0032549	K07904	PF00071	34GUF	U	sp|Q3MHP2|RB11B_BOVIN Ras-related protein Rab-11B OS=Bos taurus OX=9913 GN=RAB11B PE=2 SV=3	XP_023875324.1 ras-related protein Rab-11A-like [Quercus suber] &gt;XP_023907004.1 ras-related protein Rab-11A-like [Quercus suber]
TRINITY_DN100945_c0_g1	1185	GO:0051707;GO:0043227;GO:1901265;GO:0004497;GO:0005575;GO:0036094;GO:0009607;GO:0097159;GO:0012505;GO:0044248;GO:0043167;GO:0003824;GO:0016709;GO:0005622;GO:0051704;GO:0003674;GO:0050662;GO:0016705;GO:0019439;GO:0071949;GO:0044444;GO:0006725;GO:0043226;GO:0008150;GO:0050896;GO:0050660;GO:0055114;GO:0009620;GO:0008152;GO:0044424;GO:0009987;GO:0005737;GO:1901363;GO:0005783;GO:0016491;GO:0009056;GO:…	-	PF01494	3HWTG	C	sp|O81815|MO1_ARATH Monooxygenase 1 OS=Arabidopsis thaliana OX=3702 GN=MO1 PE=2 SV=1	CAE6193824.1 unnamed protein product [Arabidopsis arenosa]
TRINITY_DN100949_c0_g1	849	-	-	-	-	-	-	-
TRINITY_DN10094_c0_g1	1464	GO:0010556;GO:0008152;GO:0009987;GO:0032259;GO:0007275;GO:0006139;GO:0048519;GO:0006342;GO:0009889;GO:0034641;GO:0051171;GO:0006807;GO:0010605;GO:0044728;GO:0060255;GO:0043414;GO:0006996;GO:0006305;GO:0044237;GO:0065007;GO:0045892;GO:0051253;GO:0051276;GO:0090304;GO:2000112;GO:0071704;GO:1901360;GO:0032502;GO:1902679;GO:0009890;GO:0010468;GO:1903506;GO:0019219;GO:0048523;GO:0031326;GO:0006325;GO:…	-	-	3HWIN	S	sp|Q8GYP3|RDM4_ARATH RNA-directed DNA methylation 4 OS=Arabidopsis thaliana OX=3702 GN=RDM4 PE=1 SV=1	OAP07495.1 RDM4 [Arabidopsis thaliana]
TRINITY_DN100951_c0_g1	1080	GO:0022414;GO:0008234;GO:0030163;GO:0005783;GO:0005737;GO:0010623;GO:0008219;GO:0003006;GO:0009626;GO:0009505;GO:0008152;GO:0030154;GO:0000323;GO:0061458;GO:0071704;GO:0004197;GO:0048468;GO:0048367;GO:1901575;GO:0044464;GO:0005623;GO:0043231;GO:0071944;GO:0032502;GO:0043207;GO:0048658;GO:0008233;GO:0009605;GO:0048443;GO:0005575;GO:0048229;GO:0048608;GO:0005618;GO:0070011;GO:0006508;GO:0099402;GO:…	-	PF08246;PF00112	44N9E	O	sp|P25784|CYSP3_HOMAM Digestive cysteine proteinase 3 OS=Homarus americanus OX=6706 GN=LCP3 PE=2 SV=1	AFK42829.1 unknown [Lotus japonicus]
TRINITY_DN100952_c0_g1	400	-	-	-	-	-	-	-
TRINITY_DN100955_c0_g1	1590	GO:0043467;GO:0009416;GO:0043067;GO:0009570;GO:0007275;GO:0009987;GO:0044424;GO:0010038;GO:0140096;GO:0050896;GO:0031090;GO:0000327;GO:0003756;GO:0034976;GO:0000326;GO:0000003;GO:0043229;GO:0044435;GO:0065007;GO:0051716;GO:0043155;GO:0006950;GO:0005788;GO:0043227;GO:0005794;GO:0048731;GO:0005886;GO:0009892;GO:0000322;GO:0019222;GO:0010109;GO:0031974;GO:0005773;GO:0031324;GO:0065008;GO:0033554;GO:…	K09580	PF00085;PF13848	4JRE7	O	sp|P13667|PDIA4_HUMAN Protein disulfide-isomerase A4 OS=Homo sapiens OX=9606 GN=PDIA4 PE=1 SV=2	XP_020227761.1 protein disulfide-isomerase [Cajanus cajan] &gt;KYP56930.1 Protein disulfide-isomerase [Cajanus cajan]
TRINITY_DN100957_c0_g1	518	-	K18752	-	34H3V	UY	sp|O14787|TNPO2_HUMAN Transportin-2 OS=Homo sapiens OX=9606 GN=TNPO2 PE=1 SV=3	XP_002505495.1 predicted protein, partial [Micromonas commoda] &gt;ACO66753.1 predicted protein, partial [Micromonas commoda]
TRINITY_DN100958_c0_g1	353	GO:0044237;GO:0002252;GO:0051716;GO:0065007;GO:0006351;GO:1901699;GO:0003723;GO:2000112;GO:0009616;GO:1901360;GO:0006950;GO:1901698;GO:0009987;GO:0044424;GO:0052249;GO:0007275;GO:0035195;GO:0045087;GO:0032268;GO:0050896;GO:0006396;GO:0043331;GO:0097659;GO:0035821;GO:0052018;GO:1901363;GO:0060255;GO:0006807;GO:0010605;GO:0051171;GO:0030422;GO:0010050;GO:0048856;GO:0010629;GO:0005622;GO:0019827;GO:…	-	-	3G9QU	J	-	-
TRINITY_DN10095_c0_g1	923	-	-	PF04520	3HV2A	S	-	CAD5320332.1 unnamed protein product [Arabidopsis thaliana]
TRINITY_DN10095_c0_g2	545	-	-	PF04520	3HV2A	S	-	CAD5320332.1 unnamed protein product [Arabidopsis thaliana]
TRINITY_DN100963_c0_g1	729	-	K13800	PF00406	3HWFZ	F	sp|O04905|KCY3_ARATH UMP-CMP kinase 3 OS=Arabidopsis thaliana OX=3702 GN=UMK3 PE=1 SV=1	KAF7137454.1 hypothetical protein RHSIM_Rhsim07G0040000 [Rhododendron simsii]
TRINITY_DN100966_c0_g1	1034	-	K05863	PF00153	3IG3Q	C	sp|P04709|ADT1_MAIZE ADP,ATP carrier protein 1, mitochondrial OS=Zea mays OX=4577 GN=ANT1 PE=2 SV=3	GBF90828.1 ADP,ATP carrier protein, mitochondrial-like [Raphidocelis subcapitata]
TRINITY_DN100967_c0_g1	559	-	-	PF00155	34K6P	E	-	KAG2493943.1 hypothetical protein HYH03_007873 [Edaphochlamys debaryana]
TRINITY_DN100968_c0_g1	341	GO:0043170;GO:1901362;GO:0050789;GO:0048523;GO:0019219;GO:0010468;GO:0031326;GO:0006325;GO:2001141;GO:0003682;GO:0005575;GO:0019438;GO:0097159;GO:0034645;GO:0050794;GO:0003674;GO:0140030;GO:0005634;GO:0005829;GO:0046483;GO:0016043;GO:0044271;GO:0018130;GO:0051128;GO:0045893;GO:0048519;GO:0006139;GO:0009889;GO:0010467;GO:0008152;GO:0010556;GO:0009891;GO:0016070;GO:0005737;GO:0051254;GO:0034641;GO:…	-	PF00249	3GDXW	K	-	GBG74260.1 hypothetical protein CBR_g17970 [Chara braunii]
TRINITY_DN100969_c0_g1	369	-	K12825	PF12230	34JHQ	A	sp|Q8RXF1|SF3A1_ARATH Probable splicing factor 3A subunit 1 OS=Arabidopsis thaliana OX=3702 GN=At1g14650 PE=1 SV=2	KAF6251060.1 putative splicing factor 3A subunit 1 [Scenedesmus sp. NREL 46B-D3]
TRINITY_DN10096_c0_g1	1687	-	K19476	PF03398	3HTSE	Z	sp|Q54I39|IST1L_DICDI IST1-like protein OS=Dictyostelium discoideum OX=44689 GN=DDB_G0289029 PE=3 SV=1	CAE5958561.1 unnamed protein product [Arabidopsis arenosa]
TRINITY_DN100976_c0_g1	384	-	-	-	-	-	-	-
TRINITY_DN100977_c0_g1	852	-	-	-	-	-	-	-
TRINITY_DN10097_c0_g1	472	-	-	-	-	-	-	CAD5325427.1 unnamed protein product [Arabidopsis thaliana]
TRINITY_DN100982_c0_g1	454	GO:0044424;GO:0009987;GO:0042221;GO:0008152;GO:0055114;GO:0072524;GO:0010038;GO:0006139;GO:0050896;GO:0006753;GO:0009051;GO:0016491;GO:0006793;GO:0034641;GO:0051156;GO:1901363;GO:0006739;GO:0006807;GO:0004345;GO:0005737;GO:0006081;GO:1901135;GO:0043229;GO:0044237;GO:0005975;GO:0006006;GO:0019637;GO:0016616;GO:0055086;GO:0071704;GO:0050661;GO:0046496;GO:0016614;GO:0048037;GO:0043231;GO:0006098;GO:…	K00036	-	3GBQX	G	sp|P48826|G6PD_ASPNG Glucose-6-phosphate 1-dehydrogenase OS=Aspergillus niger OX=5061 GN=gsdA PE=2 SV=1	XP_023889125.1 glucose-6-phosphate 1-dehydrogenase [Quercus suber]
TRINITY_DN100983_c0_g1	396	GO:0031981;GO:0071704;GO:0005198;GO:0090304;GO:0044085;GO:0005488;GO:0005623;GO:0044464;GO:0043231;GO:0071944;GO:0022627;GO:0042788;GO:0000462;GO:0043233;GO:0016020;GO:0015935;GO:0034641;GO:0022613;GO:0006518;GO:0005737;GO:0016070;GO:0006412;GO:0008152;GO:0010467;GO:0042274;GO:0022626;GO:0006139;GO:0043603;GO:0044271;GO:0046483;GO:0005829;GO:0005634;GO:0003674;GO:0034645;GO:0044428;GO:0030312;GO:…	K02974	PF01282	3IH5U	J	sp|Q9SS17|RS241_ARATH 40S ribosomal protein S24-1 OS=Arabidopsis thaliana OX=3702 GN=RPS24A PE=2 SV=1	PRW57383.1 40S ribosomal S24 [Chlorella sorokiniana]
TRINITY_DN100984_c0_g1	629	-	-	PF01457	-	-	-	GBF90035.1 hypothetical protein Rsub_02743 [Raphidocelis subcapitata]
TRINITY_DN100986_c0_g1	367	-	K02980	-	34IEV	J	sp|P0CT15|RS29_MAGO7 40S ribosomal protein S29 OS=Magnaporthe oryzae (strain 70-15 / ATCC MYA-4617 / FGSC 8958) OX=242507 GN=RPS29 PE=3 SV=1	KAF7845886.1 hypothetical protein BT93_L0193 [Corymbia citriodora subsp. variegata]
TRINITY_DN100987_c0_g1	655	GO:0071363;GO:0044238;GO:0044309;GO:0048856;GO:0005622;GO:0043434;GO:0046872;GO:0010720;GO:0080090;GO:0032501;GO:0051965;GO:0043226;GO:0043412;GO:0042325;GO:0051049;GO:0070482;GO:0005515;GO:0045666;GO:0016773;GO:0070848;GO:0010770;GO:0046777;GO:0032869;GO:0009058;GO:0043043;GO:0044089;GO:0031344;GO:0044237;GO:0036294;GO:0051960;GO:0000166;GO:0071454;GO:0051592;GO:0140096;GO:0010038;GO:0032268;GO:…	K08292	PF02816	2QVA3	S	sp|Q54DK4|AK1_DICDI Alpha-protein kinase 1 OS=Dictyostelium discoideum OX=44689 GN=ak1 PE=3 SV=1	KAG1666185.1 hypothetical protein FOA52_012032 [Chlamydomonas sp. UWO 241]
TRINITY_DN10098_c0_g1	2148	GO:0005623;GO:0009628;GO:0044464;GO:0005829;GO:0051644;GO:0019750;GO:0051179;GO:0008150;GO:0051649;GO:0044444;GO:0051234;GO:0016043;GO:0009904;GO:0009657;GO:0051640;GO:0006996;GO:0009658;GO:0005622;GO:0005575;GO:0051641;GO:0005737;GO:0009903;GO:0051667;GO:0009314;GO:0051656;GO:0071840;GO:0050896;GO:0009416;GO:0009902;GO:0009637;GO:0044424;GO:0009987	-	PF05701	3HRRJ	S	sp|Q9C9N6|PMI2_ARATH Protein PLASTID MOVEMENT IMPAIRED 2 OS=Arabidopsis thaliana OX=3702 GN=PMI2 PE=1 SV=1	XP_002888550.1 protein PLASTID MOVEMENT IMPAIRED 2 [Arabidopsis lyrata subsp. lyrata] &gt;EFH64809.1 predicted protein [Arabidopsis lyrata subsp. lyrata]
TRINITY_DN100990_c0_g1	534	-	-	-	-	-	-	-
TRINITY_DN100992_c0_g1	309	-	-	-	-	-	-	-
TRINITY_DN100996_c0_g1	376	-	K02915	PF01199	3KZPG	J	sp|P40590|RL34_PEA 60S ribosomal protein L34 OS=Pisum sativum OX=3888 GN=RPL34 PE=2 SV=1	XP_020091241.1 60S ribosomal protein L34 [Ananas comosus] &gt;CAD1826834.1 unnamed protein product [Ananas comosus var. bracteatus]
TRINITY_DN100998_c0_g1	967	-	K02941	PF00466;PF17777	44MES	J	sp|P41095|RLA0_ORYSJ 60S acidic ribosomal protein P0 OS=Oryza sativa subsp. japonica OX=39947 GN=60SP0 PE=1 SV=3	KAG0616466.1 hypothetical protein M758_5G117900 [Ceratodon purpureus]
TRINITY_DN1009_c0_g1	3832	GO:0005911;GO:0019538;GO:0043170;GO:0043412;GO:0051707;GO:0005886;GO:0009506;GO:0032446;GO:0004839;GO:1901265;GO:0043227;GO:0044260;GO:0005575;GO:0017076;GO:0036094;GO:0097159;GO:0009607;GO:0044267;GO:0043167;GO:0044238;GO:0003824;GO:0030054;GO:0006464;GO:0046686;GO:0005622;GO:0032559;GO:0004842;GO:0051704;GO:0033554;GO:0003674;GO:0005634;GO:0032555;GO:0008641;GO:0005829;GO:0019787;GO:0044444;GO:…	K03178	PF10585;PF09358;PF00899;PF16190;PF16191	3HRS7	O	sp|P93028|UBE11_ARATH Ubiquitin-activating enzyme E1 1 OS=Arabidopsis thaliana OX=3702 GN=UBA1 PE=1 SV=1	EOA26486.1 hypothetical protein CARUB_v10022535mg, partial [Capsella rubella]
TRINITY_DN1009_c1_g1	491	GO:0003824;GO:0140096;GO:0044238;GO:0043170;GO:0070001;GO:0019538;GO:0004190;GO:0016787;GO:0008233;GO:0006508;GO:0008152;GO:0004175;GO:0006807;GO:0005575;GO:0070011;GO:0003674;GO:0071704;GO:0008150;GO:1901564;GO:0005576	-	-	3GAF6	O	-	-
TRINITY_DN100_c0_g1	2314	-	-	-	-	-	-	VVB06094.1 unnamed protein product [Arabis nemorensis]
TRINITY_DN100_c1_g1	1765	-	-	-	-	-	-	EOA23727.1 hypothetical protein CARUB_v10016941mg, partial [Capsella rubella]
TRINITY_DN100_c2_g1	1480	-	-	PF04640	3HQJN	S	sp|Q1G3Q4|RITF1_ARATH Protein RGF1 INDUCIBLE TRANSCRIPTION FACTOR 1 OS=Arabidopsis thaliana OX=3702 GN=RITF1 PE=1 SV=1	EOA17250.1 hypothetical protein CARUB_v10005524mg, partial [Capsella rubella]
TRINITY_DN101000_c0_g1	371	-	-	-	-	-	-	-
TRINITY_DN101001_c0_g1	1056	-	-	-	-	-	-	-
TRINITY_DN101004_c0_g1	760	-	K05770	PF03073	3GQ0E	T	-	PTQ38551.1 hypothetical protein MARPO_0050s0023 [Marchantia polymorpha] &gt;BBN05330.1 hypothetical protein Mp_3g12180 [Marchantia polymorpha subsp. ruderalis]
TRINITY_DN101007_c0_g1	733	-	-	PF00612	-	-	-	-
TRINITY_DN101009_c0_g1	378	-	-	-	3KWPX	CG	-	KAF6261986.1 hypothetical protein COO60DRAFT_702460 [Scenedesmus sp. NREL 46B-D3]
TRINITY_DN10100_c0_g1	1924	GO:0016853;GO:0005783;GO:0005575;GO:0005737;GO:0016860;GO:0005773;GO:0044437;GO:0043227;GO:0005996;GO:0008152;GO:0005794;GO:0044424;GO:0009045;GO:0043169;GO:0031090;GO:0098805;GO:0008150;GO:0071704;GO:0044444;GO:0043226;GO:0044464;GO:0005488;GO:0005623;GO:0043231;GO:0003674;GO:0044281;GO:0042732;GO:0016861;GO:0043229;GO:0046872;GO:0005622;GO:0005975;GO:0044446;GO:0003824;GO:0044422;GO:0098588;GO:…	K01805	PF01261	3HQRQ	O	sp|Q9FKK7|XYLA_ARATH Xylose isomerase OS=Arabidopsis thaliana OX=3702 GN=XYLA PE=2 SV=2	XP_002864523.1 xylose isomerase [Arabidopsis lyrata subsp. lyrata] &gt;EFH40782.1 xylose isomerase family protein [Arabidopsis lyrata subsp. lyrata]
TRINITY_DN101011_c0_g1	346	-	-	-	-	-	-	-
TRINITY_DN101013_c0_g1	324	-	-	-	-	-	-	KAF6266690.1 hypothetical protein COO60DRAFT_1473124 [Scenedesmus sp. NREL 46B-D3]
TRINITY_DN101014_c0_g1	563	-	-	-	-	-	-	-
TRINITY_DN101018_c0_g1	399	-	-	-	-	-	-	-
TRINITY_DN101019_c0_g1	493	-	-	-	-	-	-	-
TRINITY_DN10101_c0_g1	387	GO:0090304;GO:2000112;GO:0071704;GO:1901360;GO:0005623;GO:0044464;GO:0009292;GO:0043231;GO:0043229;GO:0044237;GO:0065007;GO:0006351;GO:0034641;GO:0051171;GO:0006807;GO:0060255;GO:0010556;GO:0008152;GO:0044424;GO:0009987;GO:0016070;GO:0006139;GO:0010467;GO:0097659;GO:0009889;GO:0051252;GO:0006725;GO:0043226;GO:0044271;GO:0008150;GO:0018130;GO:0032774;GO:1901576;GO:0080090;GO:0046483;GO:0005634;GO:…	-	PF00439	3HQUK	K	sp|Q9LXA7|GTE2_ARATH Transcription factor GTE2 OS=Arabidopsis thaliana OX=3702 GN=GTE2 PE=2 SV=2	XP_006286650.1 transcription factor GTE2 [Capsella rubella] &gt;EOA19548.1 hypothetical protein CARUB_v10002520mg [Capsella rubella]
TRINITY_DN101021_c0_g1	432	-	K02934	-	34KRT	J	sp|P34091|RL6_MESCR 60S ribosomal protein L6 OS=Mesembryanthemum crystallinum OX=3544 GN=RPL6 PE=2 SV=1	XP_005849340.1 hypothetical protein CHLNCDRAFT_21468 [Chlorella variabilis] &gt;EFN57238.1 hypothetical protein CHLNCDRAFT_21468 [Chlorella variabilis]
TRINITY_DN101023_c0_g1	653	-	-	-	-	-	-	-
TRINITY_DN101026_c0_g1	432	GO:0006793;GO:0016021;GO:1901363;GO:0032553;GO:0006807;GO:0023052;GO:0009987;GO:0008144;GO:0008152;GO:0060089;GO:0004672;GO:0006468;GO:0007165;GO:0050896;GO:0016772;GO:0140096;GO:0097367;GO:0035639;GO:0071704;GO:0036211;GO:0000166;GO:0071944;GO:0044464;GO:0006796;GO:0004675;GO:0005623;GO:0005488;GO:0016301;GO:0016740;GO:0007178;GO:0044237;GO:0043168;GO:0005524;GO:0016020;GO:0051716;GO:0065007;GO:…	K00924	-	3HSCU	T	sp|Q9FYK0|TMK2_ARATH Receptor-like kinase TMK2 OS=Arabidopsis thaliana OX=3702 GN=TMK2 PE=1 SV=1	XP_013726905.1 receptor-like kinase TMK2 [Brassica napus]
TRINITY_DN101027_c0_g1	309	-	-	-	-	-	-	-
TRINITY_DN10102_c0_g1	978	-	-	-	-	-	-	-
TRINITY_DN101036_c0_g1	468	GO:0005737;GO:0005575;GO:0045454;GO:0050896;GO:0043169;GO:0006970;GO:0050789;GO:0009987;GO:0044424;GO:0043227;GO:0003674;GO:0046914;GO:0006950;GO:0043231;GO:0005739;GO:0005488;GO:0050897;GO:0044464;GO:0005623;GO:0009628;GO:0043226;GO:0044444;GO:0008150;GO:0065007;GO:0019725;GO:0043167;GO:0042592;GO:0005622;GO:0046872;GO:0065008;GO:0043229;GO:0050794;GO:0009651	-	PF00571	3IASP	S	sp|Q9LEV3|CBSX3_ARATH CBS domain-containing protein CBSX3, mitochondrial OS=Arabidopsis thaliana OX=3702 GN=CBSX3 PE=1 SV=1	EFJ13266.1 hypothetical protein SELMODRAFT_122545 [Selaginella moellendorffii]
TRINITY_DN101037_c0_g1	649	-	-	-	-	-	-	-
TRINITY_DN101038_c0_g1	421	GO:0046872;GO:0005509;GO:0005575;GO:0005488;GO:0043167;GO:0003674;GO:0043169;GO:0016020	-	PF13499	3M6HM	T	-	-
TRINITY_DN10103_c0_g2	707	GO:0070297;GO:0008094;GO:1901363;GO:0032392;GO:0043228;GO:0034756;GO:0050896;GO:0009987;GO:0044424;GO:0006950;GO:0140097;GO:0048646;GO:0097367;GO:0035639;GO:2000112;GO:0006351;GO:0051716;GO:0065007;GO:0042393;GO:0000003;GO:0016817;GO:1902531;GO:0031974;GO:0017076;GO:0044260;GO:0019222;GO:0071310;GO:0043227;GO:0044249;GO:0010646;GO:0048731;GO:1903506;GO:0009059;GO:0032555;GO:1901576;GO:0032774;GO:…	-	-	3HP8J	K	sp|F4IHS2|SYD_ARATH Chromatin structure-remodeling complex protein SYD OS=Arabidopsis thaliana OX=3702 GN=SYD PE=1 SV=1	CAE6017514.1 unnamed protein product [Arabidopsis arenosa]
TRINITY_DN101043_c0_g1	349	-	-	-	-	-	-	-
TRINITY_DN101044_c0_g1	368	-	-	-	-	-	-	-
TRINITY_DN101045_c0_g1	327	-	K02257	-	34H13	H	sp|Q8CFY5|COX10_MOUSE Protoheme IX farnesyltransferase, mitochondrial OS=Mus musculus OX=10090 GN=Cox10 PE=2 SV=1	KAA6423234.1 protoheme IX mitochondrial-like [Trebouxia sp. A1-2]
TRINITY_DN101048_c0_g1	641	-	-	-	-	-	-	-
TRINITY_DN10104_c0_g1	342	-	-	-	-	-	-	-
TRINITY_DN101050_c0_g1	395	-	-	-	-	-	-	-
TRINITY_DN101051_c0_g1	569	-	-	PF09229	-	-	-	QDZ23292.1 hypothetical protein A3770_10p58100 [Chloropicon primus]
TRINITY_DN101053_c0_g1	498	-	K00627	-	34GTM	I	sp|P12695|ODP2_YEAST Dihydrolipoyllysine-residue acetyltransferase component of pyruvate dehydrogenase complex, mitochondrial OS=Saccharomyces cerevisiae (strain ATCC 204508 / S288c) OX=559292 GN=LAT1 PE=1 SV=1	GAQ89040.1 hypothetical protein KFL_004810130 [Klebsormidium nitens]
TRINITY_DN101058_c0_g1	460	GO:0042255;GO:0044238;GO:1901566;GO:0044391;GO:0044267;GO:0032991;GO:0044422;GO:0044446;GO:0005622;GO:0034645;GO:0003676;GO:1901576;GO:0003674;GO:0070925;GO:0009059;GO:0005829;GO:0044271;GO:0016043;GO:0043232;GO:0043226;GO:0043603;GO:0044444;GO:1901564;GO:0008150;GO:0043170;GO:0019538;GO:0071840;GO:0043604;GO:0044249;GO:0022618;GO:0022607;GO:1990904;GO:0044260;GO:0005840;GO:0005575;GO:0009058;GO:…	K02958	PF00203	3KQ9X	J	sp|Q56K10|RS15_BOVIN 40S ribosomal protein S15 OS=Bos taurus OX=9913 GN=RPS15 PE=2 SV=3	KAF8066416.1 RPS15 [Scenedesmus sp. PABB004]
TRINITY_DN10105_c0_g1	564	GO:0043067;GO:0052547;GO:0008284;GO:0009987;GO:0044424;GO:0019899;GO:0045595;GO:0031325;GO:0051173;GO:0010952;GO:0032268;GO:0043169;GO:0051345;GO:0009893;GO:0045862;GO:0002682;GO:0043280;GO:1901363;GO:0005737;GO:2000026;GO:0060255;GO:0051171;GO:0048522;GO:0012501;GO:0008219;GO:0042127;GO:0048518;GO:2000648;GO:0043229;GO:1903706;GO:0043085;GO:0010941;GO:0065007;GO:1902033;GO:0043281;GO:0044093;GO:…	K14801	-	3HRCI	S	sp|Q16342|PDCD2_HUMAN Programmed cell death protein 2 OS=Homo sapiens OX=9606 GN=PDCD2 PE=1 SV=2	VVB06980.1 unnamed protein product [Arabis nemorensis]
TRINITY_DN101060_c0_g1	462	-	K11434	PF06325	34J81	KOT	sp|Q9MAT5|ANM10_ARATH Protein arginine N-methyltransferase PRMT10 OS=Arabidopsis thaliana OX=3702 GN=PRMT10 PE=1 SV=1	KAF8070949.1 PRMT10 [Scenedesmus sp. PABB004]
TRINITY_DN101061_c0_g1	643	-	-	-	-	-	-	-
TRINITY_DN101065_c0_g1	447	-	-	-	-	-	-	-
TRINITY_DN101069_c0_g1	598	-	-	-	-	-	-	-
TRINITY_DN10106_c0_g1	1762	GO:0030163;GO:0005576;GO:0005618;GO:0070011;GO:0009057;GO:0006807;GO:0005575;GO:0006508;GO:0008152;GO:0009505;GO:0016787;GO:0004190;GO:0070001;GO:0043170;GO:0019538;GO:0140096;GO:1901575;GO:0071704;GO:0008150;GO:1901564;GO:0003674;GO:0071944;GO:0044464;GO:0005623;GO:0008233;GO:0030312;GO:0004175;GO:1901565;GO:0009056;GO:0044238;GO:0003824	-	PF14541;PF14543	3HSWM	O	sp|Q940R4|ASP63_ARATH Probable aspartyl protease At4g16563 OS=Arabidopsis thaliana OX=3702 GN=At4g16563 PE=2 SV=1	NP_567506.1 Eukaryotic aspartyl protease family protein [Arabidopsis thaliana] &gt;Q940R4.1 RecName: Full=Probable aspartyl protease At4g16563; Flags: Precursor [Arabidopsis thaliana] &gt;AAL06828.1 AT4g16560/dl4305c [Arabidopsis thaliana] &gt;AAL67094.1 AT4g16560/dl4305c [Arabidopsis thaliana] &gt;AEE83770.1 Eukaryotic aspartyl protease family protein [Arabidopsis thaliana] &gt;CAA0395492.1 unna…
TRINITY_DN101071_c0_g1	409	-	-	-	-	-	-	-
TRINITY_DN101074_c0_g1	415	-	-	-	-	-	-	VDD46557.1 unnamed protein product [Brassica oleracea]
TRINITY_DN101075_c0_g1	683	-	-	PF00917	3HY95	D	sp|Q9M2H2|MCC31_ARATH MATH domain and coiled-coil domain-containing protein At3g58440 OS=Arabidopsis thaliana OX=3702 GN=At3g58440 PE=4 SV=2	XP_006402788.1 MATH domain and coiled-coil domain-containing protein At3g58440 [Eutrema salsugineum] &gt;ESQ44241.1 hypothetical protein EUTSA_v10005920mg [Eutrema salsugineum]
TRINITY_DN101076_c0_g1	515	-	-	-	-	-	-	-
TRINITY_DN101077_c0_g1	429	-	K03235	PF00005	34HED	EJ	sp|D0MYB4|EF3_PHYIT Elongation factor 3 OS=Phytophthora infestans (strain T30-4) OX=403677 GN=TEF3 PE=1 SV=1	GAX83107.1 hypothetical protein CEUSTIGMA_g10533.t1 [Chlamydomonas eustigma]
TRINITY_DN101080_c0_g1	567	-	-	-	-	-	-	-
TRINITY_DN101081_c0_g1	403	GO:0051234;GO:0044444;GO:0043232;GO:0043226;GO:0007154;GO:0008150;GO:0051179;GO:0005776;GO:0031982;GO:0031668;GO:0006810;GO:0071705;GO:0005622;GO:0033554;GO:0006995;GO:0044248;GO:0005774;GO:0044430;GO:0009991;GO:0044446;GO:0044422;GO:0098588;GO:0031669;GO:0061919;GO:0000421;GO:0099513;GO:0005773;GO:0044437;GO:0043562;GO:0071702;GO:0005575;GO:0045184;GO:0042594;GO:0009267;GO:0043227;GO:0098805;GO:…	K08341	PF02991	3IHVD	Z	sp|Q8H715|ATG8_PHYIN Autophagy-related protein 8 OS=Phytophthora infestans OX=4787 GN=ATG8 PE=3 SV=1	XP_003563032.1 autophagy-related protein 8A [Brachypodium distachyon] &gt;KQK16037.1 hypothetical protein BRADI_1g26400v3 [Brachypodium distachyon] &gt;KQK16038.1 hypothetical protein BRADI_1g26400v3 [Brachypodium distachyon] &gt;KQK16039.1 hypothetical protein BRADI_1g26400v3 [Brachypodium distachyon]
TRINITY_DN101083_c0_g1	480	-	K02966	PF01090	34KZQ	J	sp|P58234|RS19A_SCHPO 40S ribosomal protein S19-A OS=Schizosaccharomyces pombe (strain 972 / ATCC 24843) OX=284812 GN=rps1901 PE=2 SV=1	XP_001420514.1 Ribosomal protein S19, component of cytosolic 80S ribosome and 40S small subunit [Ostreococcus lucimarinus CCE9901] &gt;ABO98807.1 Ribosomal protein S19, component of cytosolic 80S ribosome and 40S small subunit [Ostreococcus lucimarinus CCE9901]
TRINITY_DN101088_c0_g1	330	-	K02898	PF16906;PF00467	3GH26	J	sp|Q9FJX2|RL262_ARATH 60S ribosomal protein L26-2 OS=Arabidopsis thaliana OX=3702 GN=RPL26B PE=2 SV=1	GHP11716.1 60S ribosomal protein L26 [Pycnococcus provasolii]
TRINITY_DN10108_c0_g1	1349	GO:0005622;GO:0003676;GO:0044237;GO:0043229;GO:0090305;GO:0044238;GO:0003824;GO:0003723;GO:0044444;GO:0090304;GO:0043226;GO:0006725;GO:0008150;GO:0071704;GO:0004518;GO:0003674;GO:1901360;GO:0046483;GO:0005623;GO:0044464;GO:0005488;GO:0043231;GO:0005739;GO:0008152;GO:0009987;GO:0044424;GO:0016787;GO:0016070;GO:0043227;GO:0016788;GO:0006139;GO:0043170;GO:0043412;GO:1901363;GO:0097159;GO:0034641;GO:…	-	PF13041	3HMD0	S	sp|Q9SAB4|PPR33_ARATH Pentatricopeptide repeat-containing protein At1g11630, mitochondrial OS=Arabidopsis thaliana OX=3702 GN=At1g11630 PE=1 SV=1	KFK43437.1 hypothetical protein AALP_AA1G125200 [Arabis alpina]
TRINITY_DN101090_c0_g1	620	-	-	-	3I053	S	sp|Q9M2D0|FB214_ARATH F-box protein At3g61340 OS=Arabidopsis thaliana OX=3702 GN=At3g61340 PE=2 SV=1	XP_020881568.1 F-box protein At3g61340 [Arabidopsis lyrata subsp. lyrata]
TRINITY_DN101092_c0_g1	311	GO:0030422;GO:0048869;GO:0005654;GO:1901363;GO:0043331;GO:0006342;GO:0043228;GO:0050896;GO:0006396;GO:0043934;GO:0045087;GO:0009987;GO:0009617;GO:0044424;GO:0006950;GO:0005719;GO:0018205;GO:0006479;GO:0007049;GO:0034293;GO:0048437;GO:2000112;GO:0006351;GO:0005730;GO:0022402;GO:1901699;GO:0003723;GO:0048481;GO:0051716;GO:0065007;GO:0000791;GO:0044703;GO:0000003;GO:0002252;GO:0031974;GO:0044260;GO:…	-	PF02170	4JE1P	J	-	-
TRINITY_DN101097_c0_g1	953	GO:0005829;GO:0046483;GO:0019682;GO:0009507;GO:0003674;GO:1901564;GO:0008150;GO:0043226;GO:0006725;GO:0044444;GO:0003824;GO:0044238;GO:0051186;GO:0006733;GO:0005622;GO:0009536;GO:0009117;GO:0005575;GO:0017057;GO:0052689;GO:0019362;GO:0016788;GO:0043227;GO:0019693;GO:0006098;GO:0043231;GO:0005623;GO:0006796;GO:0044464;GO:0006732;GO:1901360;GO:0044281;GO:0071704;GO:0046496;GO:0019637;GO:0055086;GO:…	K01057	PF01182	3HR5D	G	sp|Q8LEV7|6PGL5_ARATH Probable 6-phosphogluconolactonase 5 OS=Arabidopsis thaliana OX=3702 GN=PGL5 PE=2 SV=2	XP_010454752.1 PREDICTED: probable 6-phosphogluconolactonase 3 [Camelina sativa]
TRINITY_DN101098_c0_g1	385	-	-	-	-	-	-	-
TRINITY_DN101099_c0_g1	468	-	-	-	-	-	-	-
TRINITY_DN10109_c0_g1	2625	GO:0097159;GO:0036094;GO:0005575;GO:1901265;GO:0004386;GO:0043170;GO:0016043;GO:0005634;GO:0046483;GO:0003674;GO:0006281;GO:0016462;GO:0032559;GO:0043167;GO:0006974;GO:0043140;GO:0017111;GO:0034641;GO:0071103;GO:0005737;GO:0006302;GO:0008144;GO:0008026;GO:0008152;GO:0006139;GO:0043169;GO:0005694;GO:0071704;GO:0032508;GO:0090304;GO:0051276;GO:0043231;GO:0005623;GO:0005488;GO:0044464;GO:0043168;GO:…	K10901	PF00271;PF16124	3HSWQ	L	sp|Q9FT72|RQL3_ARATH ATP-dependent DNA helicase Q-like 3 OS=Arabidopsis thaliana OX=3702 GN=RECQL3 PE=1 SV=1	XP_020874953.1 ATP-dependent DNA helicase Q-like 3 isoform X1 [Arabidopsis lyrata subsp. lyrata]
TRINITY_DN1010_c0_g1	1619	-	-	-	-	-	-	CAA0383659.1 unnamed protein product [Arabidopsis thaliana]
TRINITY_DN101103_c0_g1	351	-	-	-	-	-	-	-
TRINITY_DN101105_c0_g1	458	GO:0072596;GO:0045037;GO:0008104;GO:1901363;GO:0005737;GO:0051641;GO:0009941;GO:0015833;GO:0032553;GO:0070727;GO:0009570;GO:0046907;GO:0015031;GO:0044424;GO:0008144;GO:0033036;GO:0031975;GO:0072594;GO:0097367;GO:0035639;GO:0043231;GO:0044464;GO:0005488;GO:0005623;GO:0000166;GO:0043229;GO:0044435;GO:0045036;GO:0043168;GO:0005524;GO:0009532;GO:0009526;GO:0042886;GO:0006886;GO:0016020;GO:0097159;GO:…	-	PF05695	3GEA1	S	sp|A4QLX6|YCF2_NASOF Protein Ycf2 OS=Nasturtium officinale OX=65948 GN=ycf2-A PE=3 SV=1	YP_001123857.1 Ycf2 [Nasturtium officinale] &gt;YP_001123877.1 Ycf2 [Nasturtium officinale] &gt;A4QLX6.1 RecName: Full=Protein Ycf2 [Nasturtium officinale] &gt;QDE52684.1 hypothetical protein RF2 [Nasturtium officinale] &gt;QDE52709.1 hypothetical protein RF2 [Nasturtium officinale] &gt;BAF50681.1 hypothetical protein [Nasturtium officinale] &gt;BAF50702.1 hypothetical protein [Nasturtium officin…
TRINITY_DN10110_c0_g1	4217	-	-	-	-	-	-	XP_020889262.1 LOW QUALITY PROTEIN: uncharacterized protein LOC9302448 [Arabidopsis lyrata subsp. lyrata]
TRINITY_DN101111_c0_g1	809	-	K16865	PF02847	3G7D8	T	sp|Q61823|PDCD4_MOUSE Programmed cell death protein 4 OS=Mus musculus OX=10090 GN=Pdcd4 PE=1 SV=1	XP_030539047.1 programmed cell death protein 4-like [Rhodamnia argentea]
TRINITY_DN101114_c0_g1	404	GO:0005622;GO:0031967;GO:0012505;GO:0044422;GO:0030054;GO:0003824;GO:0044446;GO:0044434;GO:0043226;GO:0044444;GO:0008150;GO:0009507;GO:0003674;GO:0009628;GO:0005794;GO:0043227;GO:0005911;GO:0009506;GO:0009415;GO:0043878;GO:1901700;GO:0010033;GO:0005773;GO:0009536;GO:0005575;GO:0009269;GO:0055044;GO:0044435;GO:0043229;GO:0044237;GO:0009651;GO:0016020;GO:0009719;GO:0009526;GO:0033993;GO:0071704;GO:…	K00128	PF00171	3I2QH	C	sp|J3QMK6|AL3B3_MOUSE Aldehyde dehydrogenase family 3 member B3 OS=Mus musculus OX=10090 GN=Aldh3b3 PE=1 SV=1	XP_003577758.1 aldehyde dehydrogenase family 3 member H1 [Brachypodium distachyon] &gt;KQJ89119.1 hypothetical protein BRADI_4g23620v3 [Brachypodium distachyon]
TRINITY_DN101117_c0_g1	341	-	-	-	-	-	-	-
TRINITY_DN10111_c0_g1	1306	GO:0016772;GO:0009987;GO:0044424;GO:0008144;GO:0008152;GO:0032553;GO:0009070;GO:0005737;GO:0006807;GO:0016053;GO:0044550;GO:0006793;GO:1901363;GO:0044283;GO:1901607;GO:0019748;GO:0016740;GO:0044237;GO:0043229;GO:0005524;GO:0043168;GO:0000166;GO:0006790;GO:0044281;GO:0043231;GO:0044272;GO:0016301;GO:0044464;GO:0005623;GO:0006796;GO:0005488;GO:0035639;GO:0097367;GO:0071704;GO:0006534;GO:0000103;GO:…	K00860	PF01583	3HWJ9	F	sp|O49196|APK2_ARATH Adenylyl-sulfate kinase 2, chloroplastic OS=Arabidopsis thaliana OX=3702 GN=APK2 PE=1 SV=1	AWW15249.1 adenylyl-sulfate kinase 2 [Leavenworthia alabamica]
TRINITY_DN101121_c0_g1	418	-	-	-	-	-	-	-
TRINITY_DN101123_c0_g1	393	-	-	-	-	-	-	-
TRINITY_DN101124_c0_g1	2242	-	-	PF13349	-	-	-	-
TRINITY_DN101127_c0_g1	489	GO:0050794;GO:0044428;GO:0030312;GO:0000228;GO:0044446;GO:2000113;GO:0044422;GO:0032991;GO:0031327;GO:0016043;GO:0032993;GO:0005634;GO:0003674;GO:0010558;GO:0006325;GO:0031326;GO:0010468;GO:0019219;GO:0048523;GO:0050789;GO:0016458;GO:0040029;GO:0070013;GO:0097159;GO:0051172;GO:0005575;GO:2001141;GO:0005618;GO:0043233;GO:0051253;GO:0044427;GO:0031981;GO:0051276;GO:0044464;GO:0005623;GO:0005488;GO:…	K11251	PF16211;PF00125	44JCJ	B	sp|P13630|H2A_PARLI Histone H2A OS=Paracentrotus lividus OX=7656 PE=3 SV=2	XP_019435462.1 PREDICTED: histone H2A [Lupinus angustifolius] &gt;OIW22065.1 hypothetical protein TanjilG_01210 [Lupinus angustifolius]
TRINITY_DN10112_c0_g1	1815	-	-	PF00097	3HTWJ	DKLT	sp|O04251|Y4211_ARATH BRCT domain-containing protein At4g02110 OS=Arabidopsis thaliana OX=3702 GN=At4g02110 PE=4 SV=3	XP_006302233.1 E3 ubiquitin-protein ligase rnf8-B [Capsella rubella] &gt;EOA35131.1 hypothetical protein CARUB_v10020256mg [Capsella rubella]
TRINITY_DN101131_c0_g1	311	-	-	-	-	-	-	-
TRINITY_DN101132_c0_g1	551	GO:0017144;GO:0043226;GO:0006725;GO:0051234;GO:0044444;GO:1901564;GO:0008150;GO:0005622;GO:0046872;GO:0098660;GO:0009205;GO:0031967;GO:0044238;GO:0003824;GO:0031966;GO:0008324;GO:0044425;GO:0016310;GO:0015077;GO:0009161;GO:0046034;GO:0009126;GO:0019693;GO:0009150;GO:0045333;GO:0043227;GO:0015980;GO:0006119;GO:0045277;GO:0016676;GO:1901360;GO:0044281;GO:0070469;GO:0070069;GO:0015672;GO:0044237;GO:…	K02261	-	3IFUM	C	sp|Q38S35|COX2_APOMY Cytochrome c oxidase subunit 2 OS=Apodemus mystacinus OX=100382 GN=MT-CO2 PE=3 SV=1	YP_008816160.1 cytochrome c oxidase subunit 2 [Roya obtusa] &gt;YP_009755748.1 cytochrome c oxidase subunit 2 [Roya anglica] &gt;AGZ90369.1 cytochrome c oxidase subunit 2 [Roya obtusa] &gt;QIQ22987.1 cytochrome c oxidase subunit 2 [Roya anglica]
TRINITY_DN101133_c0_g1	318	GO:0043229;GO:0044237;GO:0016740;GO:0000209;GO:1901565;GO:0007346;GO:0009056;GO:0065007;GO:0008283;GO:0035639;GO:0097367;GO:0010564;GO:0000166;GO:0033047;GO:0009987;GO:0044424;GO:0019899;GO:0140096;GO:0010965;GO:0044265;GO:1901363;GO:0009057;GO:0006807;GO:0051603;GO:0032553;GO:0005622;GO:0006464;GO:0043161;GO:0044389;GO:0003824;GO:0044238;GO:0044248;GO:0030554;GO:1901564;GO:0008150;GO:0043226;GO:…	K06688	-	3HSFX	O	sp|Q9LJZ5|UBC19_ARATH Ubiquitin-conjugating enzyme E2 19 OS=Arabidopsis thaliana OX=3702 GN=UBC19 PE=1 SV=1	EOA31237.1 hypothetical protein CARUB_v10014409mg, partial [Capsella rubella]
TRINITY_DN101134_c0_g1	400	-	-	-	-	-	-	-
TRINITY_DN10113_c0_g1	1682	-	-	-	-	-	-	-
TRINITY_DN10113_c0_g2	1014	GO:0032502;GO:0048462;GO:0043231;GO:0005623;GO:0044464;GO:0005488;GO:0048437;GO:0048367;GO:0010097;GO:0009653;GO:0048646;GO:0061458;GO:0090696;GO:0065007;GO:0048443;GO:0010093;GO:0048455;GO:0043229;GO:0090701;GO:0000003;GO:0003006;GO:0042127;GO:0048444;GO:0010094;GO:0090567;GO:1901363;GO:0022414;GO:0048869;GO:0048519;GO:0043169;GO:0009987;GO:0044424;GO:0030154;GO:0048440;GO:0090697;GO:0007275;GO:…	-	-	3I04H	S	sp|Q6S592|JGL_ARATH Zinc finger protein JAGGED-like OS=Arabidopsis thaliana OX=3702 GN=JGL PE=2 SV=1	XP_006417125.2 zinc finger protein JAGGED-like [Eutrema salsugineum]
TRINITY_DN10113_c0_g3	325	-	-	-	-	-	-	-
TRINITY_DN101141_c0_g1	545	-	-	-	-	-	-	-
TRINITY_DN101146_c0_g1	1327	-	-	-	-	-	-	KAG1670116.1 hypothetical protein FOA52_013692 [Chlamydomonas sp. UWO 241]
TRINITY_DN101147_c0_g1	428	-	K02918	PF00831	34M56	J	sp|Q29361|RL35_PIG 60S ribosomal protein L35 OS=Sus scrofa OX=9823 GN=RPL35 PE=1 SV=3	PRW20803.1 60S ribosomal L35-like [Chlorella sorokiniana]
TRINITY_DN10114_c0_g1	1760	GO:0070013;GO:0005886;GO:0050789;GO:0005794;GO:0005788;GO:0043227;GO:0005773;GO:0005618;GO:0005575;GO:0031974;GO:0045454;GO:0012505;GO:0006457;GO:0019725;GO:0044446;GO:0003824;GO:0044422;GO:0005622;GO:0030312;GO:0050794;GO:0033554;GO:0065008;GO:0003674;GO:0044444;GO:0043226;GO:0008150;GO:0050896;GO:0140096;GO:0009987;GO:0044424;GO:0009505;GO:0016864;GO:0003756;GO:0044432;GO:0005737;GO:0016860;GO:…	K09584	PF00085	3HQPA	O	sp|O48773|PDI23_ARATH Protein disulfide-isomerase 2-3 OS=Arabidopsis thaliana OX=3702 GN=PDIL2-3 PE=2 SV=1	XP_020885802.1 protein disulfide-isomerase 2-3 [Arabidopsis lyrata subsp. lyrata] &gt;EFH57511.1 hypothetical protein ARALYDRAFT_482234 [Arabidopsis lyrata subsp. lyrata]
TRINITY_DN10114_c0_g2	3386	GO:0008150;GO:0044444;GO:0043226;GO:0097367;GO:0005623;GO:0044464;GO:0005488;GO:0043231;GO:0003674;GO:0072593;GO:0044237;GO:0043229;GO:0001530;GO:0044421;GO:0005622;GO:0044446;GO:0098588;GO:0044422;GO:0005615;GO:0065007;GO:0005774;GO:0016020;GO:0005576;GO:0019222;GO:0009058;GO:0005575;GO:0005737;GO:0060255;GO:0005773;GO:0044437;GO:0043227;GO:0010468;GO:0008152;GO:0009987;GO:0044424;GO:0050789;GO:…	-	PF02886;PF01273	3HMH8	V	sp|Q9MAU5|Y1049_ARATH Putative BPI/LBP family protein At1g04970 OS=Arabidopsis thaliana OX=3702 GN=At1g04970 PE=2 SV=1	XP_020868759.1 putative BPI/LBP family protein At1g04970 isoform X2 [Arabidopsis lyrata subsp. lyrata]
TRINITY_DN10114_c2_g1	350	-	-	-	-	-	-	-
TRINITY_DN101152_c0_g1	362	-	-	-	-	-	-	-
TRINITY_DN101153_c0_g1	460	-	-	-	-	-	-	-
TRINITY_DN101155_c0_g1	415	-	-	-	-	-	-	-
TRINITY_DN101157_c0_g1	322	-	-	-	-	-	-	-
TRINITY_DN10115_c0_g1	308	-	-	-	-	-	-	-
TRINITY_DN101160_c0_g1	312	GO:0051707;GO:0044249;GO:0043227;GO:1903506;GO:0048731;GO:0034654;GO:0017076;GO:0044260;GO:0006355;GO:0019222;GO:0009607;GO:0003677;GO:0008285;GO:0009058;GO:0031323;GO:0044238;GO:0003676;GO:0048856;GO:0005622;GO:0009059;GO:0032555;GO:0032774;GO:0080090;GO:1901576;GO:0008150;GO:0032501;GO:0030554;GO:0051252;GO:0043226;GO:0006725;GO:0097659;GO:0048580;GO:0050896;GO:0007275;GO:0001067;GO:0044424;GO:…	-	-	3HMTV	K	sp|Q9SJR5|GRF3_ARATH Growth-regulating factor 3 OS=Arabidopsis thaliana OX=3702 GN=GRF3 PE=1 SV=1	KAF8101611.1 hypothetical protein N665_0203s0023 [Sinapis alba]
TRINITY_DN101164_c0_g1	744	GO:0046872;GO:1901363;GO:0003677;GO:0097159;GO:0003676;GO:0043169;GO:0043167;GO:0003674;GO:0003723;GO:0005488	-	-	KOG1677	K	-	OAP18372.1 hypothetical protein AXX17_AT1G29980 [Arabidopsis thaliana]
TRINITY_DN101168_c0_g1	1584	GO:0010035;GO:0005623;GO:0044464;GO:0043231;GO:0030001;GO:0016020;GO:0005740;GO:0009706;GO:0009526;GO:0010039;GO:0000041;GO:0005215;GO:0043229;GO:0044435;GO:0005737;GO:0009941;GO:0022857;GO:0016021;GO:0006812;GO:0050896;GO:0031090;GO:0031975;GO:0010038;GO:0042221;GO:0044424;GO:0031969;GO:0005743;GO:0042170;GO:0003674;GO:0009507;GO:0006810;GO:0005739;GO:0044444;GO:0051234;GO:0043226;GO:0044434;GO:…	-	PF00153	3HT9C	C	sp|Q9FHX2|MFL1_ARATH Protein MITOFERRINLIKE 1, chloroplastic OS=Arabidopsis thaliana OX=3702 GN=MFL1 PE=2 SV=1	XP_010496077.1 PREDICTED: protein MITOFERRINLIKE 1, chloroplastic [Camelina sativa]
TRINITY_DN10116_c0_g1	702	-	-	-	3HTCC	S	-	XP_006411363.1 uncharacterized protein LOC18027634 [Eutrema salsugineum] &gt;ESQ52816.1 hypothetical protein EUTSA_v10016332mg [Eutrema salsugineum]
TRINITY_DN101170_c0_g1	846	GO:0071944;GO:0010033;GO:0005575;GO:0044464;GO:0005623;GO:0009746;GO:0034285;GO:1901700;GO:0009743;GO:0016021;GO:0009750;GO:0008150;GO:0044425;GO:0050896;GO:0016020;GO:0034284;GO:0031224;GO:0009749;GO:0005886;GO:0009744;GO:0042221	-	PF05562	3HZC9	S	sp|O23164|CRPM4_ARATH Cold-regulated 413 plasma membrane protein 4 OS=Arabidopsis thaliana OX=3702 GN=At4g37220 PE=2 SV=2	XP_006411949.1 cold-regulated 413 plasma membrane protein 4 [Eutrema salsugineum] &gt;ABY86895.1 stress responsive protein [Eutrema halophilum] &gt;ESQ53402.1 hypothetical protein EUTSA_v10026271mg [Eutrema salsugineum]
TRINITY_DN101172_c0_g1	307	-	-	-	-	-	-	-
TRINITY_DN101173_c0_g1	448	-	-	-	-	-	-	-
TRINITY_DN101174_c0_g1	703	-	-	-	-	-	-	-
TRINITY_DN101175_c0_g1	347	GO:0043228;GO:0010467;GO:0022626;GO:0006412;GO:0008152;GO:0009987;GO:0044424;GO:0005737;GO:0006807;GO:0015935;GO:1901363;GO:0006518;GO:0034641;GO:0016020;GO:0003723;GO:0055044;GO:0044445;GO:0044237;GO:0043229;GO:0003735;GO:0022627;GO:0005488;GO:0044464;GO:0005623;GO:0043231;GO:0005198;GO:0071704;GO:0019538;GO:0005911;GO:0043170;GO:0009506;GO:0043604;GO:0044249;GO:0043227;GO:0044260;GO:1990904;GO:…	K02976	PF01283	3GIQF	J	sp|O93931|RS26_SCHCO 40S ribosomal protein S26 OS=Schizophyllum commune OX=5334 GN=RPS26 PE=2 SV=1	RZC26481.1 40S ribosomal protein S26-1 [Glycine soja]
TRINITY_DN101176_c0_g1	424	-	-	-	3HR46	K	-	-
TRINITY_DN101179_c0_g1	394	-	-	-	-	-	-	-
TRINITY_DN10117_c0_g1	801	GO:0005737;GO:0005575;GO:0072583;GO:0009504;GO:0005886;GO:0043227;GO:0044424;GO:0005829;GO:0006810;GO:0044464;GO:0005623;GO:0006897;GO:0031982;GO:0071944;GO:0016192;GO:0006898;GO:0051179;GO:0008150;GO:0043226;GO:0098657;GO:0044444;GO:0051234;GO:0016020;GO:0005622	-	-	3HWGT	S	sp|Q9FWS1|AUL1_ARATH Auxilin-like protein 1 OS=Arabidopsis thaliana OX=3702 GN=AUL1 PE=2 SV=2	XP_023643083.1 auxilin-like protein 1 isoform X2 [Capsella rubella]
TRINITY_DN101181_c0_g1	600	-	-	-	-	-	-	-
TRINITY_DN101182_c0_g1	332	-	K14293	-	34GNI	UY	sp|Q9FJD4|IMB1_ARATH Importin subunit beta-1 OS=Arabidopsis thaliana OX=3702 GN=KPNB1 PE=1 SV=1	KAF6251652.1 armadillo-type protein [Scenedesmus sp. NREL 46B-D3]
TRINITY_DN101183_c0_g1	335	-	-	PF00701	-	-	-	-
TRINITY_DN101185_c0_g1	1493	-	-	PF03141	3HR5Z	S	sp|Q8RWB7|PMT12_ARATH Probable methyltransferase At1g29790 OS=Arabidopsis thaliana OX=3702 GN=CLSC5 PE=2 SV=1	ABE65508.1 hypothetical protein At4g01240 [Arabidopsis thaliana] &gt;OAO98826.1 hypothetical protein AXX17_AT4G01580 [Arabidopsis thaliana] &gt;CAA0392977.1 unnamed protein product [Arabidopsis thaliana] &gt;CAD5326789.1 unnamed protein product [Arabidopsis thaliana]
TRINITY_DN101187_c0_g1	392	-	K01539	PF00702	34GS1	P	sp|P05025|AT1A_TETCF Sodium/potassium-transporting ATPase subunit alpha OS=Tetronarce californica OX=7787 PE=1 SV=1	XP_030515898.1 sodium/potassium-transporting ATPase subunit alpha-like [Rhodamnia argentea]
TRINITY_DN10118_c0_g1	2573	GO:0032940;GO:0071705;GO:0005622;GO:0030496;GO:0016020;GO:0032991;GO:0042886;GO:0099023;GO:0051234;GO:0044444;GO:0016192;GO:0008150;GO:0051179;GO:0071944;GO:0000145;GO:0005829;GO:0005623;GO:0044464;GO:0006810;GO:0099568;GO:0044424;GO:0045184;GO:0015031;GO:0009987;GO:0090543;GO:0033036;GO:0005938;GO:0005886;GO:0008104;GO:0044448;GO:0015833;GO:0071702;GO:0006887;GO:0046903;GO:0005737;GO:0005575	K07195	PF03081	3GFUH	U	sp|Q9FNR3|E70E2_ARATH Exocyst complex component EXO70E2 OS=Arabidopsis thaliana OX=3702 GN=EXO70E2 PE=1 SV=1	CAE6073714.1 unnamed protein product [Arabidopsis arenosa]
TRINITY_DN10118_c1_g1	439	GO:0042886;GO:0046605;GO:0016020;GO:0051640;GO:0048285;GO:0033043;GO:0043231;GO:0044464;GO:0005623;GO:0031410;GO:0016192;GO:0051276;GO:0000920;GO:0080171;GO:0090169;GO:0015031;GO:0007088;GO:0005737;GO:0051641;GO:0010008;GO:0051726;GO:0097708;GO:0044422;GO:0098588;GO:0044446;GO:0007040;GO:0051704;GO:0050794;GO:0071705;GO:0090224;GO:0050000;GO:0005634;GO:1901673;GO:0005829;GO:1903047;GO:0098813;GO:…	K12198	-	3HXDG	U	sp|Q9FMC5|VP602_ARATH Vacuolar protein sorting-associated protein 60.2 OS=Arabidopsis thaliana OX=3702 GN=VPS60-2 PE=2 SV=1	XP_006288573.1 vacuolar protein sorting-associated protein 60.2 [Capsella rubella] &gt;EOA21471.1 hypothetical protein CARUB_v10001863mg [Capsella rubella]
TRINITY_DN101192_c0_g1	351	-	-	-	-	-	-	-
TRINITY_DN101193_c0_g1	609	-	-	-	-	-	-	-
TRINITY_DN101194_c0_g1	352	GO:0032501;GO:0140102;GO:0008150;GO:0140098;GO:0016072;GO:0043226;GO:0006725;GO:0043232;GO:0007000;GO:0034660;GO:0003676;GO:0005622;GO:0048856;GO:0003824;GO:0044238;GO:0031974;GO:0044260;GO:1990904;GO:0043227;GO:0071840;GO:0043412;GO:0070475;GO:0042254;GO:1901360;GO:0009792;GO:0043009;GO:0030684;GO:0044237;GO:0043229;GO:0016740;GO:0006996;GO:0003723;GO:0005730;GO:0006364;GO:0001701;GO:0006997;GO:…	K14568	PF03587	3G8Q7	J	sp|Q10107|NEP1_SCHPO Ribosomal RNA small subunit methyltransferase mra1 OS=Schizosaccharomyces pombe (strain 972 / ATCC 24843) OX=284812 GN=mra1 PE=1 SV=2	KAG5221190.1 cytosolic factor, phosphatidylinositol/phosphatidylcholine transfer [Salix suchowensis]
TRINITY_DN101195_c0_g1	545	-	-	-	-	-	-	-
TRINITY_DN101198_c0_g1	657	GO:0043604;GO:0044249;GO:0043227;GO:0005911;GO:0019538;GO:0006952;GO:0043170;GO:0051707;GO:0005886;GO:0009506;GO:0043043;GO:0097159;GO:0009607;GO:0009058;GO:0008135;GO:0005773;GO:0044260;GO:0005575;GO:0005622;GO:0051704;GO:0003676;GO:0034645;GO:1901566;GO:0044267;GO:0044238;GO:0006414;GO:0032991;GO:0030054;GO:0043603;GO:0044444;GO:0003746;GO:0098542;GO:0044271;GO:0043226;GO:1901564;GO:0008150;GO:…	K03232	PF00736	37I6F	J	sp|A5D989|EF1D_BOVIN Elongation factor 1-delta OS=Bos taurus OX=9913 GN=EEF1D PE=2 SV=2	BAJ99614.1 predicted protein [Hordeum vulgare subsp. vulgare]
TRINITY_DN10119_c0_g1	399	GO:0003677;GO:0097159;GO:0009058;GO:0019438;GO:0019222;GO:2001141;GO:0044260;GO:0006355;GO:0005575;GO:0034654;GO:0019219;GO:1903506;GO:0010468;GO:0044249;GO:0043227;GO:0031326;GO:0043170;GO:0050789;GO:0008289;GO:1901362;GO:0051252;GO:0044271;GO:0006725;GO:0043226;GO:0008150;GO:0018130;GO:0032774;GO:0003674;GO:0080090;GO:1901576;GO:0046483;GO:0009059;GO:0005634;GO:0005622;GO:0003676;GO:0050794;GO:…	K09338	PF01852	3GC0G	K	sp|O04292|ATBH9_ARATH Homeobox-leucine zipper protein ATHB-9 OS=Arabidopsis thaliana OX=3702 GN=ATHB-9 PE=1 SV=1	ESQ33818.1 hypothetical protein EUTSA_v10006792mg [Eutrema salsugineum]
TRINITY_DN1011_c0_g1	1947	GO:0009889;GO:0140096;GO:0009987;GO:0044424;GO:0008152;GO:0010556;GO:0032259;GO:0016741;GO:0060255;GO:0005737;GO:0006807;GO:0016570;GO:0051171;GO:0035247;GO:0018193;GO:0065007;GO:0008168;GO:0035246;GO:0016740;GO:0006996;GO:0043414;GO:0018216;GO:0044237;GO:0016571;GO:0006479;GO:0044464;GO:0005623;GO:2000112;GO:0051276;GO:0071704;GO:0036211;GO:0043170;GO:0019538;GO:0018195;GO:0071840;GO:0050789;GO:…	K11437	PF06325	3HP79	KOT	sp|Q08A71|ANM6_ARATH Probable protein arginine N-methyltransferase 6 OS=Arabidopsis thaliana OX=3702 GN=PRMT6 PE=2 SV=1	CAA7036440.1 unnamed protein product [Microthlaspi erraticum]
TRINITY_DN101200_c0_g1	678	-	-	PF00811	-	-	-	-
TRINITY_DN101201_c0_g1	959	GO:0000959;GO:0043227;GO:0043412;GO:0090615;GO:0016788;GO:0043170;GO:0097159;GO:0005575;GO:0003676;GO:0090305;GO:0005622;GO:0003824;GO:0044238;GO:0008150;GO:0044444;GO:0006725;GO:0043226;GO:0046483;GO:0005739;GO:0003674;GO:0016787;GO:0016070;GO:0008152;GO:1900864;GO:0009987;GO:0044424;GO:0010467;GO:0006396;GO:0006139;GO:0080156;GO:0009451;GO:0004519;GO:1901363;GO:0034641;GO:0000963;GO:0005737;GO:…	-	-	KOG4197	S	sp|Q6NQ83|PP247_ARATH Pentatricopeptide repeat-containing protein At3g22470, mitochondrial OS=Arabidopsis thaliana OX=3702 GN=At3g22470 PE=1 SV=1	KAF2540482.1 hypothetical protein F2Q68_00031782 [Brassica cretica] &gt;KAF2585835.1 hypothetical protein F2Q70_00036592 [Brassica cretica] &gt;KAF3534245.1 hypothetical protein DY000_02041667 [Brassica cretica]
TRINITY_DN101202_c0_g1	411	-	-	-	-	-	-	-
TRINITY_DN101206_c0_g1	945	GO:0031224;GO:0016020;GO:0005623;GO:0044464;GO:0005575;GO:0005737;GO:0005622;GO:0044424;GO:0016021;GO:0044425	K13348	PF04117	3HNXZ	S	sp|Q54FR4|PX24D_DICDI PXMP2/4 family protein 4 OS=Dictyostelium discoideum OX=44689 GN=DDB_G0290631 PE=3 SV=1	XP_006299560.1 PXMP2/4 family protein 4 [Capsella rubella] &gt;EOA32458.1 hypothetical protein CARUB_v10015735mg [Capsella rubella]
TRINITY_DN101209_c0_g1	301	-	-	-	-	-	-	-
TRINITY_DN10120_c0_g1	2917	GO:0012506;GO:0005798;GO:0043229;GO:0016020;GO:0030665;GO:0006886;GO:0042886;GO:0016192;GO:0030135;GO:0030658;GO:0031410;GO:0044464;GO:0005623;GO:0030121;GO:0043231;GO:0015031;GO:0044424;GO:0046907;GO:0030120;GO:0030117;GO:0031090;GO:0033036;GO:0008104;GO:0030662;GO:0048475;GO:0098796;GO:0030659;GO:0097708;GO:0070727;GO:0015833;GO:0005737;GO:0051641;GO:0005622;GO:0071705;GO:0030660;GO:0030119;GO:…	K12391	PF01602;PF02883	3HQPT	U	sp|Q9ZUI6|AP1G2_ARATH AP-1 complex subunit gamma-2 OS=Arabidopsis thaliana OX=3702 GN=At1g60070 PE=1 SV=2	XP_020890491.1 AP-1 complex subunit gamma-2 [Arabidopsis lyrata subsp. lyrata] &gt;XP_020890492.1 AP-1 complex subunit gamma-2 [Arabidopsis lyrata subsp. lyrata] &gt;XP_020890493.1 AP-1 complex subunit gamma-2 [Arabidopsis lyrata subsp. lyrata] &gt;XP_020890495.1 AP-1 complex subunit gamma-2 [Arabidopsis lyrata subsp. lyrata] &gt;XP_020890496.1 AP-1 complex subunit gamma-2 [Arabidopsis lyrata sub…
TRINITY_DN101213_c0_g1	345	GO:0003824;GO:0044238;GO:0043167;GO:1901566;GO:0044267;GO:0034660;GO:0034645;GO:0032559;GO:0005622;GO:0043436;GO:0009059;GO:0032555;GO:0046483;GO:1901576;GO:0003674;GO:0030554;GO:0140098;GO:1901564;GO:0008150;GO:0006725;GO:0044271;GO:0043603;GO:0004814;GO:0019752;GO:0043170;GO:0019538;GO:0006420;GO:1901265;GO:0044249;GO:0043604;GO:0016875;GO:0017076;GO:0036094;GO:0006399;GO:0006520;GO:0005575;GO:…	K01887	-	3HR18	J	-	XP_010539375.1 PREDICTED: arginine--tRNA ligase, cytoplasmic isoform X1 [Tarenaya hassleriana]
TRINITY_DN101214_c0_g1	530	GO:0044238;GO:0005774;GO:0003824;GO:0016818;GO:0098660;GO:0005622;GO:0015405;GO:0065008;GO:0034660;GO:0009507;GO:0045851;GO:0090662;GO:0099131;GO:0044444;GO:0051234;GO:0043226;GO:0006725;GO:0016072;GO:0008150;GO:0016887;GO:0006873;GO:0022804;GO:0071840;GO:0036442;GO:0055067;GO:0043227;GO:0005773;GO:0055082;GO:0042623;GO:0008324;GO:0050801;GO:0015399;GO:0051453;GO:0044425;GO:0015077;GO:0065007;GO:…	-	PF00137	3I5ZD	C	-	-
TRINITY_DN101217_c0_g1	511	-	-	PF05730	-	-	-	-
TRINITY_DN101218_c0_g1	319	-	-	-	-	-	-	XP_002876934.1 uncharacterized protein LOC9311355 isoform X1 [Arabidopsis lyrata subsp. lyrata] &gt;EFH53193.1 predicted protein [Arabidopsis lyrata subsp. lyrata]
TRINITY_DN10121_c0_g1	1864	GO:0044444;GO:0044434;GO:0016043;GO:0043226;GO:0008150;GO:0009507;GO:0005623;GO:0044464;GO:0005739;GO:0043231;GO:0006996;GO:0009658;GO:0005622;GO:0031967;GO:0044435;GO:0043229;GO:0031968;GO:0016020;GO:0009657;GO:0044446;GO:0098588;GO:0009526;GO:0044422;GO:0019867;GO:0009707;GO:0009527;GO:0005575;GO:0009536;GO:0009941;GO:0005737;GO:0009987;GO:0044424;GO:0031969;GO:0042170;GO:0043227;GO:0098805;GO:…	-	PF01103	3HQ3J	M	sp|Q5PP51|OEP39_ARATH Outer envelope protein 39, chloroplastic OS=Arabidopsis thaliana OX=3702 GN=P39 PE=2 SV=1	XP_010496865.1 PREDICTED: outer envelope protein 80, chloroplastic [Camelina sativa]
TRINITY_DN101223_c0_g1	377	-	K12586	PF01138	37SXB	J	sp|Q10205|RRP43_SCHPO Exosome complex component rrp43 OS=Schizosaccharomyces pombe (strain 972 / ATCC 24843) OX=284812 GN=rrp43 PE=3 SV=1	ONM03350.1 3&apos;-5&apos;-exoribonuclease family protein [Zea mays]
TRINITY_DN101224_c0_g1	526	GO:1901360;GO:2000112;GO:0006351;GO:0065007;GO:0043229;GO:0044237;GO:0051171;GO:0006807;GO:0060255;GO:2000026;GO:0048364;GO:1901363;GO:0097659;GO:0040008;GO:0007275;GO:0045595;GO:0009987;GO:0044424;GO:0009059;GO:0032774;GO:0030856;GO:1901576;GO:0080090;GO:0008150;GO:0032501;GO:0051252;GO:0051301;GO:0006725;GO:0043226;GO:0045682;GO:0031323;GO:0044238;GO:0003676;GO:0046872;GO:0005622;GO:0048856;GO:…	-	-	3HN1Q	K	-	-
TRINITY_DN10122_c0_g1	544	GO:0016874;GO:0051188;GO:0006793;GO:0033875;GO:0035384;GO:1901363;GO:0006807;GO:0016053;GO:0032787;GO:1901293;GO:0048364;GO:0032553;GO:1901135;GO:0007275;GO:0044424;GO:0009987;GO:0009933;GO:0050896;GO:0006637;GO:0044255;GO:0035639;GO:0097367;GO:0072330;GO:0090421;GO:0044272;GO:1901360;GO:0000166;GO:0006790;GO:0044281;GO:0006629;GO:0044237;GO:0000003;GO:0035383;GO:0009165;GO:0072521;GO:0044283;GO:…	K11262	-	3HRFK	I	sp|Q38970|ACC1_ARATH Acetyl-CoA carboxylase 1 OS=Arabidopsis thaliana OX=3702 GN=ACC1 PE=1 SV=1	XP_013715078.2 LOW QUALITY PROTEIN: acetyl-CoA carboxylase 1 [Brassica napus]
TRINITY_DN101232_c0_g1	327	-	-	-	-	-	-	-
TRINITY_DN101233_c0_g1	417	GO:0046394;GO:0004312;GO:0044238;GO:0003824;GO:0008150;GO:0050662;GO:0003674;GO:1901576;GO:0043436;GO:0044249;GO:1901265;GO:0019752;GO:0051287;GO:0102132;GO:0097159;GO:0009058;GO:0006082;GO:0036094;GO:0030497;GO:0016740;GO:0044237;GO:0016746;GO:0006629;GO:0044283;GO:0006633;GO:0016616;GO:0072330;GO:0048037;GO:0016614;GO:0050661;GO:0044255;GO:0071704;GO:0044281;GO:0000166;GO:0005488;GO:0006631;GO:…	-	PF13561	3I6H8	Q	sp|A0A084B9Z1|SAT3_STACB Short-chain dehydrogenase/reductase SAT3 OS=Stachybotrys chartarum (strain CBS 109288 / IBT 7711) OX=1280523 GN=SAT3 PE=3 SV=1	XP_023870759.1 short-chain dehydrogenase/reductase SAT3-like [Quercus suber]
TRINITY_DN101234_c0_g1	629	-	-	PF00190	3G7XG	S	sp|P09350|SR1A_PHYPO Spherulin-1A OS=Physarum polycephalum OX=5791 PE=1 SV=1	GAQ83174.1 Putative cupin family protein [Klebsormidium nitens]
TRINITY_DN101235_c0_g1	482	-	-	-	-	-	-	-
TRINITY_DN101236_c0_g1	347	-	-	-	-	-	-	-
TRINITY_DN101239_c0_g1	411	-	-	-	-	-	-	-
TRINITY_DN10123_c0_g1	990	-	-	PF02362	-	-	sp|Q9XIB4|Y1475_ARATH B3 domain-containing protein At1g49475 OS=Arabidopsis thaliana OX=3702 GN=At1g49475 PE=2 SV=2	XP_010461783.1 PREDICTED: B3 domain-containing protein At1g49475-like [Camelina sativa]
TRINITY_DN101240_c0_g1	386	-	-	-	-	-	-	-
TRINITY_DN101243_c0_g1	339	-	-	-	-	-	-	-
TRINITY_DN101244_c0_g1	435	GO:0044435;GO:0044237;GO:0043229;GO:0016020;GO:0043231;GO:0022900;GO:0005623;GO:0005488;GO:0044464;GO:0044424;GO:0009987;GO:0008152;GO:0043169;GO:0034357;GO:0055114;GO:0009535;GO:0016491;GO:0031984;GO:0005737;GO:0005622;GO:0009055;GO:0046872;GO:0043167;GO:0044422;GO:0044436;GO:0044446;GO:0005507;GO:0003824;GO:0043226;GO:0044434;GO:0044444;GO:0031977;GO:0055035;GO:0008150;GO:0006091;GO:0009507;GO:…	K02638	-	3HTQ2	C	sp|P11490|PLAS1_ARATH Plastocyanin minor isoform, chloroplastic OS=Arabidopsis thaliana OX=3702 GN=PETE PE=1 SV=2	CAA7012797.1 unnamed protein product [Microthlaspi erraticum] &gt;CAA7042552.1 unnamed protein product [Microthlaspi erraticum]
TRINITY_DN10124_c0_g1	1103	-	-	-	-	-	-	-
TRINITY_DN101251_c0_g1	306	-	-	PF08740	-	-	sp|Q9CZP5|BCS1_MOUSE Mitochondrial chaperone BCS1 OS=Mus musculus OX=10090 GN=Bcs1l PE=1 SV=1	-
TRINITY_DN101252_c0_g1	331	-	-	-	-	-	-	-
TRINITY_DN101253_c0_g1	436	-	K03098	-	-	-	sp|Q32KY0|APOD_BOVIN Apolipoprotein D OS=Bos taurus OX=9913 GN=APOD PE=2 SV=1	CAH58720.1 lipocalin-like protein [Physcomitrium patens]
TRINITY_DN101254_c0_g1	502	-	-	PF19193	-	-	-	-
TRINITY_DN101256_c0_g1	311	GO:0044237;GO:0003723;GO:0071704;GO:0005623;GO:0005488;GO:0044464;GO:0009987;GO:0044424;GO:0006412;GO:0008152;GO:0010467;GO:0034641;GO:0006518;GO:1901363;GO:0006807;GO:0005737;GO:0005853;GO:0034645;GO:0003676;GO:0005622;GO:0032991;GO:0006414;GO:0044238;GO:0044267;GO:1901566;GO:1901564;GO:0008150;GO:0044271;GO:0003746;GO:0043603;GO:0044444;GO:0005829;GO:0009059;GO:1901576;GO:0003674;GO:0044249;GO:…	K03232	-	3I7BP	J	sp|Q69BZ7|EF1B_PENCI Elongation factor 1-beta OS=Penicillium citrinum OX=5077 PE=1 SV=1	XP_023883604.1 elongation factor 1-beta-like [Quercus suber]
TRINITY_DN101258_c0_g1	404	-	K10246	PF01151	3GJ0Q	I	sp|Q9HB03|ELOV3_HUMAN Elongation of very long chain fatty acids protein 3 OS=Homo sapiens OX=9606 GN=ELOVL3 PE=1 SV=2	KAB8556613.1 hypothetical protein FH972_025650 [Carpinus fangiana]
TRINITY_DN10125_c0_g1	1802	GO:2001141;GO:0031324;GO:0045934;GO:0005575;GO:0023051;GO:0051172;GO:0140110;GO:0019222;GO:0048827;GO:0009892;GO:0050789;GO:0099402;GO:1903506;GO:0019219;GO:0048523;GO:0048731;GO:0003712;GO:0010646;GO:0031326;GO:0043227;GO:0010558;GO:0003674;GO:0080134;GO:0080090;GO:0005634;GO:0051252;GO:0031327;GO:0043226;GO:1903507;GO:0008150;GO:0032501;GO:0031323;GO:2000022;GO:0009966;GO:0005622;GO:0048856;GO:…	-	-	3HVWK	S	sp|Q7XA73|TIF4A_ARATH Protein TIFY 4A OS=Arabidopsis thaliana OX=3702 GN=TIFY4A PE=1 SV=1	AKN91691.1 BIG SEEDS 1 [Boechera stricta]
TRINITY_DN101260_c0_g1	366	-	K02974	-	3GPJY	J	sp|Q9SS17|RS241_ARATH 40S ribosomal protein S24-1 OS=Arabidopsis thaliana OX=3702 GN=RPS24A PE=2 SV=1	XP_024390000.1 40S ribosomal protein S24-1-like [Physcomitrium patens] &gt;XP_024392752.1 40S ribosomal protein S24-1-like [Physcomitrium patens] &gt;PNR42881.1 hypothetical protein PHYPA_017713 [Physcomitrium patens] &gt;PNR43717.1 hypothetical protein PHYPA_016099 [Physcomitrium patens]
TRINITY_DN101263_c0_g1	376	-	-	-	-	-	-	-
TRINITY_DN101265_c0_g1	559	-	-	-	-	-	-	KAF6255918.1 hypothetical protein COO60DRAFT_164481 [Scenedesmus sp. NREL 46B-D3]
TRINITY_DN101267_c0_g1	510	-	-	-	-	-	-	GBG48440.1 hypothetical protein CBR_g82150, partial [Chara braunii]
TRINITY_DN10126_c0_g1	6682	GO:0031974;GO:0017076;GO:0044260;GO:0022607;GO:0003677;GO:0071840;GO:0043412;GO:0043227;GO:0005515;GO:0032446;GO:0032555;GO:1901564;GO:0008150;GO:0030554;GO:0000786;GO:0006259;GO:0043226;GO:0006725;GO:0043232;GO:0031625;GO:0044815;GO:0003824;GO:0016818;GO:0044238;GO:0003676;GO:0033554;GO:0006464;GO:0044389;GO:0046872;GO:0005622;GO:0006807;GO:0032553;GO:1901363;GO:0005654;GO:0140096;GO:0050896;GO:…	K15710	PF00176	3HRAF	L	sp|Q7TPQ3|SHPRH_MOUSE E3 ubiquitin-protein ligase SHPRH OS=Mus musculus OX=10090 GN=Shprh PE=1 SV=1	CAD5320986.1 unnamed protein product [Arabidopsis thaliana] &gt;VYS55105.1 unnamed protein product [Arabidopsis thaliana]
TRINITY_DN101273_c0_g1	466	-	-	-	-	-	-	-
TRINITY_DN101274_c0_g1	409	GO:0140096;GO:0048506;GO:0080022;GO:0044275;GO:0007275;GO:0016787;GO:1905393;GO:0009987;GO:0044424;GO:0008152;GO:0090697;GO:0005737;GO:0033926;GO:0048364;GO:0004575;GO:0048528;GO:0046352;GO:0005987;GO:0044262;GO:0009056;GO:0065007;GO:0140103;GO:0016798;GO:0015926;GO:0044237;GO:0005975;GO:0005984;GO:0044464;GO:0005623;GO:0032502;GO:0010101;GO:0009653;GO:0071704;GO:0048646;GO:0090696;GO:1901575;GO:…	-	PF12899	3HVGX	S	sp|Q9C560|INVF_ARATH Probable alkaline/neutral invertase F OS=Arabidopsis thaliana OX=3702 GN=INVF PE=2 SV=1	EOA34198.1 hypothetical protein CARUB_v10021707mg [Capsella rubella]
TRINITY_DN10127_c0_g1	1750	-	-	-	-	-	-	XP_006284537.1 protein SHORT HYPOCOTYL IN WHITE LIGHT 1 [Capsella rubella] &gt;EOA17435.1 hypothetical protein CARUB_v10005738mg [Capsella rubella]
TRINITY_DN101280_c0_g1	407	GO:0031326;GO:0019219;GO:0032879;GO:0010468;GO:0050789;GO:1901362;GO:0003690;GO:0043170;GO:0097159;GO:0140110;GO:0019438;GO:0005575;GO:2000012;GO:0048608;GO:2001141;GO:0050794;GO:0003700;GO:0034645;GO:0043565;GO:0009960;GO:0010154;GO:0045893;GO:0018130;GO:0009791;GO:0044271;GO:0046483;GO:0005634;GO:0003674;GO:0009891;GO:0016070;GO:0008152;GO:0010556;GO:1990837;GO:0010467;GO:0009889;GO:0048316;GO:…	K09260	-	3HU7V	K	-	XP_020889053.1 agamous-like MADS-box protein AGL62 [Arabidopsis lyrata subsp. lyrata]
TRINITY_DN101283_c0_g1	840	-	-	-	-	-	-	XP_010450025.1 PREDICTED: uncharacterized protein LOC104732185 [Camelina sativa]
TRINITY_DN101285_c0_g1	303	-	-	PF08911	-	-	-	-
TRINITY_DN101288_c0_g1	369	-	-	-	-	-	-	-
TRINITY_DN101295_c0_g1	388	-	-	-	KOG1601	K	-	XP_020881442.1 uncharacterized protein LOC9300849 isoform X3 [Arabidopsis lyrata subsp. lyrata]
TRINITY_DN101298_c0_g1	312	GO:0044424;GO:0009987;GO:0008420;GO:0016787;GO:0007275;GO:0050896;GO:0071365;GO:0045935;GO:0097659;GO:0140096;GO:0051173;GO:0031325;GO:1901363;GO:0032870;GO:0000428;GO:0006793;GO:0005654;GO:0009755;GO:0048522;GO:0051171;GO:0023052;GO:0060255;GO:0004647;GO:0006807;GO:0044237;GO:0043229;GO:0051716;GO:0065007;GO:0004721;GO:0006351;GO:0003723;GO:2000112;GO:1903508;GO:1901360;GO:1903506;GO:0044249;GO:…	K18998	-	3HRGR	K	sp|Q5YDB5|CPL2_ARATH RNA polymerase II C-terminal domain phosphatase-like 2 OS=Arabidopsis thaliana OX=3702 GN=CPL2 PE=1 SV=3	-
TRINITY_DN101299_c0_g1	673	-	-	-	-	-	-	-
TRINITY_DN10129_c0_g1	1154	GO:0016604;GO:0005622;GO:0003676;GO:0043229;GO:0044428;GO:0005774;GO:0016020;GO:0070717;GO:0043233;GO:0044446;GO:0044422;GO:0098588;GO:0003723;GO:0008143;GO:0044444;GO:0043226;GO:0003727;GO:0031981;GO:0003674;GO:0005488;GO:0044464;GO:0005623;GO:0005634;GO:0043231;GO:0044451;GO:0044424;GO:0043621;GO:0005515;GO:0043227;GO:0016607;GO:0098805;GO:0031090;GO:0070013;GO:1901363;GO:0097159;GO:0005654;GO:…	K14396	-	3HZDU	A	sp|Q9FJN9|PABN2_ARATH Polyadenylate-binding protein 2 OS=Arabidopsis thaliana OX=3702 GN=PABN2 PE=1 SV=1	NP_201329.1 RNA-binding (RRM/RBD/RNP motifs) family protein [Arabidopsis thaliana] &gt;Q9FJN9.1 RecName: Full=Polyadenylate-binding protein 2; Short=AtPabN2; Short=AtPabN3; Short=Poly(A)-binding protein 2; AltName: Full=Nuclear poly(A)-binding protein 2; AltName: Full=Poly(A)-binding protein II; Short=PABII [Arabidopsis thaliana] &gt;AAK62429.1 poly(A)-binding protein II-like [Arabidopsis thalian…
TRINITY_DN10129_c0_g2	1473	GO:0016020;GO:0009719;GO:0065007;GO:2000241;GO:0008233;GO:0044421;GO:1905622;GO:0048583;GO:0009651;GO:0032502;GO:0071944;GO:0008237;GO:0051239;GO:0006950;GO:0001101;GO:0031225;GO:0044464;GO:0005488;GO:0005623;GO:0010035;GO:0048831;GO:0071704;GO:1900056;GO:0048519;GO:0043169;GO:0050896;GO:0006970;GO:0048580;GO:0140096;GO:0010038;GO:2000024;GO:0042221;GO:0008152;GO:0016787;GO:0007275;GO:0009725;GO:…	-	PF00413;PF01471	3HX1F	O	sp|O04529|2MMP_ARATH Metalloendoproteinase 2-MMP OS=Arabidopsis thaliana OX=3702 GN=2MMP PE=1 SV=1	XP_010512095.1 PREDICTED: metalloendoproteinase 2-MMP [Camelina sativa]
TRINITY_DN1012_c0_g1	3624	GO:0005622;GO:0065008;GO:0007015;GO:0009606;GO:0044430;GO:0043254;GO:0043226;GO:0043232;GO:0009630;GO:0043242;GO:0001558;GO:0008150;GO:0005515;GO:0051049;GO:0071310;GO:0044087;GO:0097435;GO:0071840;GO:0051014;GO:0022607;GO:0032271;GO:0030835;GO:0006996;GO:0043229;GO:0065007;GO:0051716;GO:0007010;GO:0015629;GO:0032432;GO:0005856;GO:0030029;GO:0030833;GO:0090066;GO:0044424;GO:0009987;GO:0040008;GO:…	-	PF02209;PF00626	3HN28	Z	sp|O81644|VILI2_ARATH Villin-2 OS=Arabidopsis thaliana OX=3702 GN=VLN2 PE=1 SV=2	CAA0376238.1 unnamed protein product [Arabidopsis thaliana]
TRINITY_DN101300_c0_g1	322	-	-	-	-	-	-	-
TRINITY_DN101303_c0_g1	329	-	-	-	-	-	-	-
TRINITY_DN101306_c0_g1	358	-	-	-	34ICI	S	-	KAF6257307.1 hypothetical protein COO60DRAFT_1524452 [Scenedesmus sp. NREL 46B-D3]
TRINITY_DN101308_c0_g1	438	-	-	-	-	-	-	-
TRINITY_DN101309_c0_g1	555	-	-	-	-	-	-	-
TRINITY_DN10130_c0_g1	2046	GO:0003677;GO:0097159;GO:0019438;GO:0009058;GO:0140110;GO:0019222;GO:0010087;GO:0044260;GO:2001141;GO:0006355;GO:0034654;GO:0005575;GO:1903506;GO:0010468;GO:0019219;GO:0048731;GO:0044249;GO:0031326;GO:0043227;GO:0043170;GO:0050789;GO:1901362;GO:0051252;GO:0043226;GO:0006725;GO:0044271;GO:0008150;GO:0032501;GO:0018130;GO:0032774;GO:0003674;GO:1901576;GO:0080090;GO:0046483;GO:0005634;GO:0009059;GO:…	-	PF02365	3HTRB	K	sp|Q8GWK6|NC104_ARATH NAC domain-containing protein 104 OS=Arabidopsis thaliana OX=3702 GN=NAC104 PE=2 SV=1	NP_201258.2 xylem NAC domain 1 [Arabidopsis thaliana] &gt;Q8GWK6.1 RecName: Full=NAC domain-containing protein 104; Short=ANAC104; AltName: Full=Protein XYLEM NAC DOMAIN 1 [Arabidopsis thaliana] &gt;ABF83636.1 At5g64530 [Arabidopsis thaliana] &gt;AED97913.1 xylem NAC domain 1 [Arabidopsis thaliana] &gt;OAO91200.1 XND1 [Arabidopsis thaliana] &gt;CAA0411979.1 unnamed protein product [Arabidopsis th…
TRINITY_DN101316_c0_g1	301	-	-	-	-	-	-	-
TRINITY_DN10131_c0_g1	1553	GO:0008289;GO:0035091;GO:0005488;GO:0003674;GO:0043167;GO:0005543;GO:0043168	-	PF01167	3HXJ3	S	sp|Q9S9M8|TLP8_ARATH Tubby-like protein 8 OS=Arabidopsis thaliana OX=3702 GN=TULP8 PE=2 SV=1	XP_002892894.1 tubby-like protein 8 [Arabidopsis lyrata subsp. lyrata] &gt;EFH69153.1 hypothetical protein ARALYDRAFT_471808 [Arabidopsis lyrata subsp. lyrata]
TRINITY_DN101320_c0_g1	394	-	-	-	KOG0017	L	-	XP_020886039.1 uncharacterized protein LOC110229688 [Arabidopsis lyrata subsp. lyrata]
TRINITY_DN101324_c0_g1	369	-	-	-	-	-	-	-
TRINITY_DN101328_c0_g1	489	-	-	-	4JTBI	L	-	KAG6417940.1 hypothetical protein SASPL_120137 [Salvia splendens]
TRINITY_DN10132_c0_g1	1361	GO:0009889;GO:0010467;GO:0097659;GO:0006139;GO:0016070;GO:0009987;GO:0044424;GO:0010556;GO:0008152;GO:0006807;GO:0060255;GO:0051171;GO:0034641;GO:1901363;GO:0006351;GO:0065007;GO:0043229;GO:0044237;GO:0043231;GO:0005623;GO:0044464;GO:0005488;GO:1901360;GO:0071704;GO:2000112;GO:0090304;GO:1901362;GO:0050789;GO:0043170;GO:0031326;GO:0043227;GO:0044249;GO:1903506;GO:0010468;GO:0019219;GO:0034654;GO:…	-	PF02362	3HQ24	K	sp|Q1G3M3|Y3918_ARATH B3 domain-containing protein At3g19184 OS=Arabidopsis thaliana OX=3702 GN=At3g19184 PE=2 SV=1	XP_006298352.1 B3 domain-containing protein At3g19184 [Capsella rubella] &gt;EOA31250.1 hypothetical protein CARUB_v10014420mg [Capsella rubella]
TRINITY_DN101330_c0_g1	399	-	-	-	-	-	-	-
TRINITY_DN101331_c0_g1	360	-	-	-	-	-	-	-
TRINITY_DN101333_c0_g1	348	GO:0005938;GO:0071840;GO:0043412;GO:0005515;GO:0044260;GO:0017076;GO:0016310;GO:0016773;GO:0031033;GO:0046777;GO:0044238;GO:0044430;GO:0003824;GO:0005622;GO:0016905;GO:0006464;GO:0032555;GO:0043232;GO:0043226;GO:0051301;GO:0044444;GO:0030554;GO:1901564;GO:0008150;GO:0043228;GO:0140096;GO:0009987;GO:0044424;GO:0017022;GO:0004672;GO:0032553;GO:0006807;GO:0030036;GO:0006793;GO:0004683;GO:1901363;GO:…	-	PF13445;PF00643	3IE1T	S	sp|P14373|TRI27_HUMAN Zinc finger protein RFP OS=Homo sapiens OX=9606 GN=TRIM27 PE=1 SV=1	XP_027094057.1 uncharacterized protein LOC113714429 [Coffea arabica]
TRINITY_DN101334_c0_g1	403	GO:0008652;GO:0006979;GO:1901605;GO:0009058;GO:0005886;GO:0009309;GO:0000162;GO:0044249;GO:0043227;GO:0005515;GO:0042445;GO:0009507;GO:0042435;GO:1901576;GO:0008150;GO:1901564;GO:0006576;GO:0044444;GO:0044434;GO:0006725;GO:0043226;GO:0003824;GO:0044238;GO:0065008;GO:0009308;GO:0046394;GO:0005622;GO:0016835;GO:0009851;GO:0016053;GO:0006807;GO:0032787;GO:0004834;GO:0050896;GO:0010817;GO:0009570;GO:…	-	-	3HWGM	E	sp|P14671|TRPB1_ARATH Tryptophan synthase beta chain 1, chloroplastic OS=Arabidopsis thaliana OX=3702 GN=TSB1 PE=2 SV=1	-
TRINITY_DN101336_c0_g1	1287	-	-	-	-	-	-	-
TRINITY_DN10133_c0_g1	1690	GO:0044422;GO:0003824;GO:0044446;GO:0016020;GO:0031224;GO:0043167;GO:0005789;GO:0012505;GO:0043229;GO:0020037;GO:0005622;GO:0046872;GO:0043231;GO:0046914;GO:0044464;GO:0005623;GO:0005488;GO:0016705;GO:0003674;GO:0008150;GO:0043226;GO:0046906;GO:0044444;GO:0048037;GO:0055114;GO:0042175;GO:0043169;GO:0043227;GO:0044424;GO:0008152;GO:0005737;GO:0044432;GO:0005575;GO:0004497;GO:0005506;GO:0044425;GO:…	-	PF00067	3HPMC	Q	sp|Q6NKZ8|C14A2_ARATH Cytochrome P450 714A2 OS=Arabidopsis thaliana OX=3702 GN=CYP714A2 PE=2 SV=1	OAO90081.1 ELA2 [Arabidopsis thaliana] &gt;VYS67842.1 unnamed protein product [Arabidopsis thaliana]
TRINITY_DN101348_c0_g1	578	-	-	PF02557	-	-	-	KAG2440738.1 hypothetical protein HXX76_003595 [Chlamydomonas incerta]
TRINITY_DN101349_c0_g1	321	-	-	PF03694	34MQI	S	sp|O80594|ERG28_ARATH Ergosterol biosynthetic protein 28 OS=Arabidopsis thaliana OX=3702 GN=At1g10030 PE=2 SV=2	KAF8060619.1 rplL [Scenedesmus sp. PABB004]
TRINITY_DN10134_c0_g1	723	-	-	-	-	-	-	XP_002881598.1 uncharacterized protein LOC9315815 [Arabidopsis lyrata subsp. lyrata] &gt;EFH57857.1 hypothetical protein ARALYDRAFT_482856 [Arabidopsis lyrata subsp. lyrata]
TRINITY_DN101353_c0_g1	1114	GO:0065008;GO:0016847;GO:0048856;GO:0046394;GO:0003824;GO:0043167;GO:1901566;GO:0010154;GO:0044238;GO:0008150;GO:1901564;GO:0042218;GO:0032501;GO:0018871;GO:0016829;GO:0009692;GO:0043436;GO:0003674;GO:0042445;GO:0050662;GO:1901576;GO:0044249;GO:0005515;GO:0007568;GO:0048731;GO:0071695;GO:0019752;GO:1901605;GO:0016846;GO:0006082;GO:0097159;GO:0070279;GO:0019842;GO:0009058;GO:0008652;GO:0006520;GO:…	K01762	PF00155	3HQWD	E	sp|Q9T065|1A18_ARATH 1-aminocyclopropane-1-carboxylate synthase 8 OS=Arabidopsis thaliana OX=3702 GN=ACS8 PE=1 SV=1	CAE6153775.1 unnamed protein product [Arabidopsis arenosa]
TRINITY_DN101356_c0_g1	624	-	-	-	-	-	-	-
TRINITY_DN101358_c0_g1	432	GO:0044424;GO:0007275;GO:0043227;GO:0031461;GO:0048519;GO:0070013;GO:0051093;GO:0043228;GO:0050789;GO:1990234;GO:1902183;GO:0005654;GO:0050793;GO:0048509;GO:0005575;GO:0031974;GO:0005737;GO:1902184;GO:0080008;GO:0048856;GO:0005622;GO:0000151;GO:0043229;GO:0044428;GO:0065007;GO:1902494;GO:0043233;GO:0044446;GO:0032991;GO:0005730;GO:0044422;GO:0043232;GO:0043226;GO:0008150;GO:0031981;GO:0032501;GO:…	K18643	PF12894	3HQRI	S	sp|O15736|TIPD_DICDI Protein tipD OS=Dictyostelium discoideum OX=44689 GN=tipD PE=3 SV=1	CAG1851536.1 unnamed protein product [Musa acuminata subsp. malaccensis]
TRINITY_DN101359_c0_g1	313	GO:0044422;GO:0003824;GO:0044446;GO:0044238;GO:0043167;GO:0030312;GO:0032559;GO:0046686;GO:0005622;GO:0046872;GO:0032555;GO:0005739;GO:0043436;GO:0046914;GO:0009507;GO:0006091;GO:0003674;GO:0030554;GO:0008150;GO:0017144;GO:0006101;GO:0043226;GO:0044444;GO:0019752;GO:0044429;GO:0070013;GO:0015980;GO:1901265;GO:0043227;GO:0045333;GO:0036094;GO:0031974;GO:0017076;GO:0009536;GO:0005575;GO:0072350;GO:…	K01647	PF00285	3GF4T	C	sp|Q553V1|CISYM_DICDI Citrate synthase, mitochondrial OS=Dictyostelium discoideum OX=44689 GN=cs PE=3 SV=1	EFJ29959.1 hypothetical protein SELMODRAFT_146083 [Selaginella moellendorffii]
TRINITY_DN10135_c0_g1	822	-	K02885	PF01280	34H5U	J	sp|P49693|RL193_ARATH 60S ribosomal protein L19-3 OS=Arabidopsis thaliana OX=3702 GN=RPL19C PE=2 SV=3	KAF6266377.1 component of cytosolic 80S ribosome and 60S large subunit [Scenedesmus sp. NREL 46B-D3]
TRINITY_DN10135_c0_g2	391	GO:0009059;GO:0005634;GO:0005829;GO:1901576;GO:0003674;GO:0008150;GO:1901564;GO:0043232;GO:0044271;GO:0043226;GO:0043603;GO:0044444;GO:0032991;GO:0044422;GO:0030054;GO:0044446;GO:0044238;GO:1901566;GO:0044267;GO:0044391;GO:0034645;GO:0044428;GO:0003676;GO:0005622;GO:0031974;GO:0005840;GO:0005575;GO:1990904;GO:0044260;GO:0003729;GO:0009058;GO:0043043;GO:0097159;GO:0009506;GO:0005886;GO:0070013;GO:…	K02885	-	4JIXN	J	sp|Q9LUQ6|RL192_ARATH 60S ribosomal protein L19-2 OS=Arabidopsis thaliana OX=3702 GN=RPL19B PE=2 SV=1	KZV47143.1 hypothetical protein F511_16985 [Dorcoceras hygrometricum]
TRINITY_DN10135_c1_g1	405	GO:1901564;GO:0008150;GO:0043603;GO:0044444;GO:0044271;GO:0043232;GO:0043226;GO:0009059;GO:0005829;GO:0003674;GO:1901576;GO:0003676;GO:0034645;GO:0005622;GO:0044446;GO:0032991;GO:0044422;GO:1901566;GO:0044267;GO:0044391;GO:0044238;GO:0043043;GO:0097159;GO:0009058;GO:0005840;GO:0005575;GO:1990904;GO:0044260;GO:0044249;GO:0005844;GO:0015934;GO:0022625;GO:0043604;GO:0005886;GO:0019538;GO:0043170;GO:…	K02885	-	3GC4Q	J	sp|O42699|RL19B_SCHPO 60S ribosomal protein L19-B OS=Schizosaccharomyces pombe (strain 972 / ATCC 24843) OX=284812 GN=rpl1902 PE=2 SV=2	XP_023926143.1 LOW QUALITY PROTEIN: eIF-2-alpha kinase activator gcn1-like [Quercus suber]
TRINITY_DN10135_c2_g1	433	GO:0006518;GO:0034641;GO:1901363;GO:0005737;GO:0006807;GO:0009987;GO:0044424;GO:0008152;GO:0006412;GO:0043228;GO:0022626;GO:0010467;GO:0005198;GO:0071704;GO:0031981;GO:0071944;GO:0003735;GO:0043231;GO:0044464;GO:0005623;GO:0005488;GO:0055044;GO:0043229;GO:0044237;GO:0042788;GO:0044445;GO:0016020;GO:0005730;GO:0003723;GO:0043233;GO:0009058;GO:0043043;GO:0097159;GO:0003729;GO:1990904;GO:0044260;GO:…	K02885	-	3IDQ9	J	sp|P05734|RL19A_SCHPO 60S ribosomal protein L19-A OS=Schizosaccharomyces pombe (strain 972 / ATCC 24843) OX=284812 GN=rpl1901 PE=1 SV=3	XP_023926143.1 LOW QUALITY PROTEIN: eIF-2-alpha kinase activator gcn1-like [Quercus suber]
TRINITY_DN101360_c0_g1	569	GO:0005681;GO:0005911;GO:0003725;GO:0051168;GO:0009506;GO:0034613;GO:0010501;GO:0045184;GO:0043227;GO:1990904;GO:0000398;GO:0071702;GO:0042623;GO:0031974;GO:0017076;GO:0003677;GO:0050658;GO:0019222;GO:0006405;GO:0044238;GO:0003824;GO:0016818;GO:0030054;GO:0070035;GO:0071166;GO:0005622;GO:0046686;GO:0003676;GO:0051169;GO:0033554;GO:0003697;GO:0006611;GO:0032555;GO:0051234;GO:0043232;GO:0043226;GO:…	K12812	PF00271	3HPSK	A	sp|Q5JK84|RH15_ORYSJ DEAD-box ATP-dependent RNA helicase 15 OS=Oryza sativa subsp. japonica OX=39947 GN=AIP2 PE=1 SV=1	PRW61181.1 DEAD-box ATP-dependent RNA helicase 15-like isoform X1 [Chlorella sorokiniana]
TRINITY_DN101361_c0_g1	737	GO:0009536;GO:0003885;GO:0036094;GO:0080049;GO:0005575;GO:0046364;GO:0006082;GO:0044425;GO:0009058;GO:0097159;GO:0031966;GO:0019752;GO:0044429;GO:0043227;GO:1901265;GO:0044249;GO:0016633;GO:0005996;GO:0009108;GO:0043436;GO:0005739;GO:1901576;GO:0003674;GO:0050662;GO:0016899;GO:0008150;GO:0043226;GO:0044444;GO:0044422;GO:0009110;GO:0044446;GO:0003824;GO:0031224;GO:0051186;GO:0044238;GO:0043167;GO:…	K00225	PF01565	44C1C	V	sp|Q8HXW0|GGLO_PIG L-gulonolactone oxidase OS=Sus scrofa OX=9823 GN=GULO PE=2 SV=3	KAF8056371.1 hypothetical protein HT031_006370 [Scenedesmus sp. PABB004]
TRINITY_DN101365_c0_g1	1079	-	K15040	PF01459	34IRC	P	sp|Q84P97|VDAC5_ORYSJ Mitochondrial outer membrane protein porin 5 OS=Oryza sativa subsp. japonica OX=39947 GN=VDAC5 PE=2 SV=1	KAF6263342.1 voltage-dependent anion-selective channel protein [Scenedesmus sp. NREL 46B-D3]
TRINITY_DN10136_c0_g1	1251	GO:0050794;GO:0051704;GO:0006995;GO:0044267;GO:0031224;GO:0016239;GO:0051128;GO:0007154;GO:0010506;GO:0003674;GO:0004839;GO:0009267;GO:0050789;GO:0019538;GO:0006952;GO:0043170;GO:2000785;GO:0061919;GO:0005575;GO:0043207;GO:0048518;GO:0009894;GO:0043476;GO:0033043;GO:0070647;GO:0009605;GO:0016020;GO:0036211;GO:0033059;GO:0071704;GO:0016877;GO:0016567;GO:0090549;GO:0010508;GO:0008152;GO:0009893;GO:…	K17888	-	3HV2N	S	sp|Q8VZ52|ATG10_ARATH Ubiquitin-like-conjugating enzyme ATG10 OS=Arabidopsis thaliana OX=3702 GN=ATG10 PE=1 SV=1	NP_850533.1 autophagocytosis-associated family protein [Arabidopsis thaliana] &gt;AEE74555.1 autophagocytosis-associated family protein [Arabidopsis thaliana] &gt;OAP01605.1 ATG10 [Arabidopsis thaliana] &gt;CAA0381678.1 unnamed protein product [Arabidopsis thaliana]
TRINITY_DN101370_c0_g1	320	-	-	-	-	-	-	-
TRINITY_DN101371_c0_g1	584	-	-	PF02221	-	-	-	-
TRINITY_DN101372_c0_g1	306	-	K10047	PF00459	34HQD	G	sp|P54928|IMP3_SOLLC Inositol monophosphatase 3 OS=Solanum lycopersicum OX=4081 GN=IMP3 PE=1 SV=1	KAF6258437.1 putative inositol monophosphatase 3 [Scenedesmus sp. NREL 46B-D3]
TRINITY_DN101374_c0_g1	405	-	-	-	-	-	-	-
TRINITY_DN101376_c0_g1	333	-	-	-	44J24	D	-	-
TRINITY_DN101378_c0_g1	415	-	-	PF00571	34IKS	S	sp|Q9C5D0|CBSX2_ARATH CBS domain-containing protein CBSX2, chloroplastic OS=Arabidopsis thaliana OX=3702 GN=CBSX2 PE=1 SV=1	KAF6257882.1 inosine-5&apos;-monophosphate dehydrogenase [Scenedesmus sp. NREL 46B-D3]
TRINITY_DN10137_c0_g1	1252	GO:0048523;GO:0005515;GO:0005886;GO:0050789;GO:0097435;GO:0071840;GO:0044087;GO:0032273;GO:0051493;GO:0032956;GO:0044425;GO:0051016;GO:1902903;GO:0005575;GO:0032271;GO:0030835;GO:0051129;GO:0005618;GO:0050794;GO:0030832;GO:0065008;GO:0007015;GO:0045010;GO:0030312;GO:0030838;GO:1902904;GO:0031224;GO:0008092;GO:0051128;GO:0008150;GO:0043242;GO:0043254;GO:0016043;GO:0032970;GO:0051130;GO:0003779;GO:…	-	PF02181	3HVCF	TZ	sp|O22824|FH2_ARATH Formin-like protein 2 OS=Arabidopsis thaliana OX=3702 GN=FH2 PE=3 SV=1	NP_181908.1 Actin-binding FH2 (formin homology 2) family protein [Arabidopsis thaliana] &gt;O22824.1 RecName: Full=Formin-like protein 2; Short=AtFH2; Short=AtFORMIN-2; Flags: Precursor [Arabidopsis thaliana] &gt;AAB64026.1 unknown protein [Arabidopsis thaliana] &gt;AEC10328.1 Actin-binding FH2 (formin homology 2) family protein [Arabidopsis thaliana] &gt;OAP08654.1 hypothetical protein AXX17_AT2…
TRINITY_DN101380_c0_g1	348	-	-	-	-	-	-	-
TRINITY_DN101383_c0_g1	827	-	K11251	PF00125;PF16211	34HVF	B	sp|P08985|H2AV_DROME Histone H2A.v OS=Drosophila melanogaster OX=7227 GN=His2Av PE=1 SV=2	XP_005644573.1 histone 2A variant [Coccomyxa subellipsoidea C-169] &gt;EIE20029.1 histone 2A variant [Coccomyxa subellipsoidea C-169]
TRINITY_DN101386_c0_g1	806	GO:0016740;GO:0003674;GO:0016757;GO:0003824	-	PF00534	3HMR0	M	sp|Q81ST7|BSHA_BACAN N-acetyl-alpha-D-glucosaminyl L-malate synthase OS=Bacillus anthracis OX=1392 GN=bshA PE=1 SV=1	XP_006306942.1 uncharacterized protein LOC17899465 [Capsella rubella] &gt;EOA39840.1 hypothetical protein CARUB_v10008509mg [Capsella rubella]
TRINITY_DN101387_c0_g1	519	-	-	-	-	-	sp|Q58A42|DD3_DICDI Protein DD3-3 OS=Dictyostelium discoideum OX=44689 GN=DD3-3 PE=2 SV=1	GAQ83716.1 NADPH oxidase [Klebsormidium nitens]
TRINITY_DN101390_c0_g1	470	GO:0005829;GO:0046483;GO:0003674;GO:0044271;GO:0043603;GO:0032991;GO:0044422;GO:0044446;GO:0044267;GO:1901566;GO:0034645;GO:0030312;GO:0009536;GO:0005575;GO:0005618;GO:0003729;GO:0097159;GO:0043170;GO:0019538;GO:0034470;GO:0032040;GO:0043604;GO:0043231;GO:0044464;GO:0005623;GO:0005488;GO:0030686;GO:0022627;GO:0071944;GO:0071704;GO:0044085;GO:0090304;GO:0005198;GO:0016020;GO:0042788;GO:0005737;GO:…	K02993	PF01251	3G7FK	J	sp|Q9ZNS1|RS7_AVIMR 40S ribosomal protein S7 OS=Avicennia marina OX=82927 GN=RPS7 PE=2 SV=1	XP_011099551.1 40S ribosomal protein S7 [Sesamum indicum]
TRINITY_DN101391_c0_g1	303	-	-	-	-	-	-	-
TRINITY_DN101393_c0_g1	508	-	-	-	-	-	-	-
TRINITY_DN101394_c0_g1	352	-	-	-	-	-	-	-
TRINITY_DN101396_c0_g1	330	-	-	-	-	-	-	-
TRINITY_DN101397_c0_g1	452	-	-	-	-	-	-	-
TRINITY_DN101398_c0_g1	301	GO:0031325;GO:0006338;GO:0007275;GO:0060089;GO:0030522;GO:0032553;GO:0023052;GO:0006807;GO:2000026;GO:0006793;GO:0010244;GO:0055086;GO:0006875;GO:2000241;GO:0006996;GO:0030003;GO:0048583;GO:0043229;GO:0044237;GO:0044281;GO:1901360;GO:0000166;GO:0042726;GO:2000243;GO:0009645;GO:0048037;GO:0048831;GO:2000377;GO:0043412;GO:0071840;GO:0048638;GO:0005515;GO:0005773;GO:0055082;GO:0009607;GO:0002376;GO:…	K12119	-	3HMYH	LT	sp|P40115|CRY1_SINAL Cryptochrome-1 OS=Sinapis alba OX=3728 GN=PHR1 PE=2 SV=1	BBA94327.1 cryptochrome 2, partial [Cardamine bellidifolia] &gt;BBA94328.1 cryptochrome 2, partial [Cardamine bellidifolia] &gt;BBA94329.1 cryptochrome 2, partial [Cardamine bellidifolia] &gt;BBA94330.1 cryptochrome 2, partial [Cardamine bellidifolia]
TRINITY_DN10139_c0_g1	1158	-	K20301	PF04628	3HVVU	S	sp|Q54CU7|TPC2L_DICDI Trafficking protein particle complex subunit 2-like protein OS=Dictyostelium discoideum OX=44689 GN=trappc2l PE=3 SV=1	NP_565493.1 SNARE-like superfamily protein [Arabidopsis thaliana] &gt;XP_010416840.1 PREDICTED: trafficking protein particle complex subunit 2-like protein [Camelina sativa] &gt;XP_010428991.1 PREDICTED: trafficking protein particle complex subunit 2-like protein [Camelina sativa] &gt;XP_010472075.1 PREDICTED: trafficking protein particle complex subunit 2-like protein [Camelina sativa] &gt;CAE59…
TRINITY_DN1013_c0_g1	1237	-	-	PF00300	3HTFG	G	-	XP_002876557.1 uncharacterized protein LOC9312625 [Arabidopsis lyrata subsp. lyrata] &gt;EFH52816.1 hypothetical protein ARALYDRAFT_486518 [Arabidopsis lyrata subsp. lyrata]
TRINITY_DN1013_c0_g2	1190	-	-	-	3HTFG	G	-	XP_006402582.1 uncharacterized protein LOC18020056 [Eutrema salsugineum] &gt;ESQ44035.1 hypothetical protein EUTSA_v10006156mg [Eutrema salsugineum]
TRINITY_DN1013_c1_g1	844	-	-	-	3HTFG	G	-	AAO41882.1 unknown protein [Arabidopsis thaliana] &gt;AAU05528.1 At3g60440 [Arabidopsis thaliana] &gt;CAB81830.1 putative protein [Arabidopsis thaliana]
TRINITY_DN1013_c2_g1	1218	-	-	PF05553;PF14364	3HU1H	S	sp|F4K956|A70_ARATH Pathogen-associated molecular patterns-induced protein A70 OS=Arabidopsis thaliana OX=3702 GN=A70 PE=1 SV=1	XP_010438798.1 PREDICTED: uncharacterized protein LOC104722346 [Camelina sativa]
TRINITY_DN101402_c0_g1	302	-	-	-	-	-	-	-
TRINITY_DN101405_c0_g1	702	-	-	PF08241	44DIX	E	sp|P0DPD7|EFMT4_HUMAN EEF1A lysine methyltransferase 4 OS=Homo sapiens OX=9606 GN=EEF1AKMT4 PE=1 SV=1	XP_015063121.1 EEF1A lysine methyltransferase 4 [Solanum pennellii]
TRINITY_DN101408_c0_g1	390	-	-	-	-	-	-	-
TRINITY_DN10140_c0_g1	355	GO:0005102;GO:0017076;GO:0044260;GO:0005773;GO:0016310;GO:0044425;GO:0016773;GO:0046777;GO:0048638;GO:0009506;GO:0005886;GO:0043412;GO:0009908;GO:0005911;GO:0043227;GO:0005515;GO:0048731;GO:0032555;GO:0030554;GO:0032501;GO:1901564;GO:0008150;GO:0043226;GO:0044444;GO:0030054;GO:0003824;GO:0044238;GO:0010080;GO:0009909;GO:0005622;GO:0048856;GO:0006464;GO:0006807;GO:2000026;GO:0032553;GO:0048869;GO:…	K00924	PF07714	3HPFF	T	sp|Q9SYQ8|CLV1_ARATH Receptor protein kinase CLAVATA1 OS=Arabidopsis thaliana OX=3702 GN=CLV1 PE=1 SV=3	XP_010416487.1 PREDICTED: receptor protein kinase CLAVATA1-like [Camelina sativa]
TRINITY_DN101412_c0_g1	361	-	-	-	-	-	-	-
TRINITY_DN101414_c0_g1	441	-	-	PF12418	-	-	sp|Q5LLW7|DMDC_RUEPO 3-methylmercaptopropionyl-CoA dehydrogenase OS=Ruegeria pomeroyi (strain ATCC 700808 / DSM 15171 / DSS-3) OX=246200 GN=dmdC PE=1 SV=1	BAJ99459.1 predicted protein [Hordeum vulgare subsp. vulgare]
TRINITY_DN101419_c0_g1	313	-	-	-	-	-	-	-
TRINITY_DN101423_c0_g1	331	GO:0030119;GO:0005622;GO:0071705;GO:0044422;GO:0032991;GO:0044446;GO:0008565;GO:0012505;GO:0051649;GO:0051179;GO:0008150;GO:0043226;GO:0044444;GO:0051234;GO:0006810;GO:0031982;GO:0003674;GO:0043227;GO:0045184;GO:0034613;GO:0005794;GO:0044433;GO:0044425;GO:0005575;GO:0071702;GO:0043229;GO:0005215;GO:0012506;GO:0030123;GO:0006886;GO:0042886;GO:0016020;GO:0016192;GO:0043231;GO:0031410;GO:0044464;GO:…	K12399	-	44RJJ	U	sp|Q1JQA3|AP3S2_BOVIN AP-3 complex subunit sigma-2 OS=Bos taurus OX=9913 GN=AP3S2 PE=2 SV=1	GBG70527.1 hypothetical protein CBR_g6655 [Chara braunii]
TRINITY_DN101426_c0_g1	691	-	-	-	-	-	-	-
TRINITY_DN101429_c0_g1	417	-	-	-	-	-	-	-
TRINITY_DN10142_c0_g1	727	GO:0009903;GO:0005737;GO:0051641;GO:0046983;GO:0017006;GO:0034641;GO:0010467;GO:0009889;GO:0016772;GO:0006139;GO:0006468;GO:0007165;GO:0016070;GO:0008152;GO:0009585;GO:0010556;GO:0104004;GO:0071489;GO:0010017;GO:0018202;GO:0005488;GO:0044464;GO:0005623;GO:0006796;GO:0007602;GO:0051644;GO:0000160;GO:0036211;GO:0071704;GO:0051606;GO:0090304;GO:0009605;GO:0018193;GO:0071482;GO:0051640;GO:0009639;GO:…	K12121	-	3HZ6E	T	sp|P14713|PHYB_ARATH Phytochrome B OS=Arabidopsis thaliana OX=3702 GN=PHYB PE=1 SV=1	BAH79244.1 phytochrome B, partial [Cardamine nipponica]
TRINITY_DN101433_c0_g1	388	-	-	-	-	-	-	-
TRINITY_DN101435_c0_g1	391	-	-	PF02737	34H1R	I	sp|P41938|HCDH2_CAEEL Probable 3-hydroxyacyl-CoA dehydrogenase B0272.3 OS=Caenorhabditis elegans OX=6239 GN=B0272.3 PE=3 SV=1	-
TRINITY_DN101436_c0_g1	323	-	-	-	-	-	-	-
TRINITY_DN101439_c0_g1	437	-	-	-	-	-	-	-
TRINITY_DN101440_c0_g1	551	-	-	-	-	-	-	-
TRINITY_DN101441_c0_g1	356	-	-	-	-	-	-	-
TRINITY_DN101448_c0_g1	384	-	K10357	PF00063	3GBJ8	Z	sp|F4IVR7|MYO10_ARATH Myosin-10 OS=Arabidopsis thaliana OX=3702 GN=XI-D PE=3 SV=1	VVB07275.1 unnamed protein product [Arabis nemorensis]
TRINITY_DN101449_c0_g1	1525	-	-	PF16683	-	-	-	-
TRINITY_DN10144_c0_g1	3666	GO:0048046;GO:0009505;GO:0016787;GO:0043227;GO:0004565;GO:0044424;GO:0008152;GO:0004553;GO:0098805;GO:0031090;GO:0005576;GO:0005737;GO:0005575;GO:0044437;GO:0005618;GO:0005773;GO:0043229;GO:0030312;GO:0030246;GO:0005975;GO:0005622;GO:0015925;GO:0098588;GO:0044422;GO:0003824;GO:0044446;GO:0044238;GO:0016798;GO:0016020;GO:0005774;GO:0071704;GO:0008150;GO:0043226;GO:0044444;GO:0043231;GO:0044464;GO:…	-	PF02140	3HZ0R	G	sp|Q9SCV3|BGAL9_ARATH Beta-galactosidase 9 OS=Arabidopsis thaliana OX=3702 GN=BGAL9 PE=2 SV=1	XP_010469542.1 PREDICTED: beta-galactosidase 9 isoform X1 [Camelina sativa]
TRINITY_DN101450_c0_g1	830	-	-	-	-	-	-	-
TRINITY_DN101451_c0_g1	404	-	-	-	-	-	-	-
TRINITY_DN101452_c0_g1	425	-	-	-	-	-	-	-
TRINITY_DN101457_c0_g1	401	-	-	-	-	-	-	-
TRINITY_DN101458_c0_g1	392	-	-	-	-	-	-	-
TRINITY_DN10145_c0_g1	649	-	-	-	3I0XP	S	sp|Q9ZT17|AGP3_ARATH Classical arabinogalactan protein 3 OS=Arabidopsis thaliana OX=3702 GN=AGP3 PE=2 SV=1	XP_006286045.1 classical arabinogalactan protein 3 [Capsella rubella] &gt;EOA18943.1 hypothetical protein CARUB_v10007575mg [Capsella rubella]
TRINITY_DN101461_c0_g1	334	GO:0003674;GO:0006551;GO:1901576;GO:0009507;GO:0043436;GO:0006549;GO:0044444;GO:0043226;GO:0044434;GO:1901564;GO:0008150;GO:0052656;GO:1901566;GO:0052654;GO:0044238;GO:0044446;GO:0009081;GO:0003824;GO:0044422;GO:0005622;GO:0046394;GO:0009099;GO:0006573;GO:0008652;GO:0005575;GO:0006520;GO:0009536;GO:0009058;GO:1901605;GO:0006082;GO:0009098;GO:0008483;GO:0019752;GO:0044249;GO:0043227;GO:0044281;GO:…	K00826	-	4JHIV	E	sp|Q9FYA6|BCAT5_ARATH Branched-chain-amino-acid aminotransferase 5, chloroplastic OS=Arabidopsis thaliana OX=3702 GN=BCAT5 PE=1 SV=1	-
TRINITY_DN101465_c0_g1	307	-	-	-	-	-	-	-
TRINITY_DN101469_c0_g1	372	-	-	-	-	-	-	-
TRINITY_DN10146_c0_g1	335	-	-	-	-	-	-	-
TRINITY_DN101470_c0_g1	473	-	-	PF00153	34M3K	C	sp|Q9LV81|BRTL3_ARATH Probable mitochondrial adenine nucleotide transporter BTL3 OS=Arabidopsis thaliana OX=3702 GN=At5g64970 PE=2 SV=1	KAF8068375.1 BTL3 [Scenedesmus sp. PABB004]
TRINITY_DN101471_c0_g1	433	GO:0019438;GO:0097159;GO:0050145;GO:0036094;GO:0009117;GO:0009536;GO:0005575;GO:0044437;GO:1901265;GO:1901362;GO:0098805;GO:0018130;GO:0009123;GO:0044271;GO:0005739;GO:0046914;GO:0046483;GO:0016776;GO:0003674;GO:0032559;GO:0098588;GO:0044422;GO:0004017;GO:0005507;GO:0044446;GO:0043167;GO:0034641;GO:0005737;GO:0008144;GO:0042221;GO:0008152;GO:0006139;GO:0043169;GO:0006753;GO:0016772;GO:0071704;GO:…	K00939	PF00406;PF05191	3GCGN	F	sp|Q290A8|KAD2_DROPS Adenylate kinase OS=Drosophila pseudoobscura pseudoobscura OX=46245 GN=Adk2 PE=3 SV=2	XP_013905879.1 adenylate kinase [Monoraphidium neglectum] &gt;KIZ06860.1 adenylate kinase [Monoraphidium neglectum]
TRINITY_DN101472_c0_g1	511	GO:0005623;GO:0044464;GO:0005488;GO:0006397;GO:0043231;GO:0016071;GO:0044451;GO:1901360;GO:0031981;GO:0071704;GO:0090304;GO:0043233;GO:0003723;GO:0044237;GO:0043229;GO:0006807;GO:0005737;GO:1901363;GO:0005654;GO:0034641;GO:0005849;GO:0010467;GO:0006396;GO:0006139;GO:0016070;GO:0008152;GO:0009987;GO:0044424;GO:0046483;GO:0005634;GO:0003674;GO:0031124;GO:0008150;GO:0003730;GO:0006379;GO:0043226;GO:…	K12741	PF00076	3GFRS	A	sp|Q9SHZ6|UBA1A_ARATH UBP1-associated proteins 1A OS=Arabidopsis thaliana OX=3702 GN=UBA1A PE=1 SV=2	EFJ30434.1 hypothetical protein SELMODRAFT_169811 [Selaginella moellendorffii]
TRINITY_DN101473_c0_g1	598	-	-	PF04707	3I73Z	U	sp|Q58DB0|PLD3B_BOVIN PRELI domain containing protein 3B OS=Bos taurus OX=9913 GN=PRELID3B PE=2 SV=1	PTQ36880.1 hypothetical protein MARPO_0061s0125 [Marchantia polymorpha] &gt;BBM99804.1 hypothetical protein Mp_1g23950 [Marchantia polymorpha subsp. ruderalis]
TRINITY_DN101474_c0_g1	515	-	-	-	-	-	-	-
TRINITY_DN101477_c0_g1	384	-	-	-	-	-	-	-
TRINITY_DN101479_c0_g1	368	-	-	-	-	-	-	-
TRINITY_DN101482_c0_g1	375	-	K20102	-	3HQ3S	S	-	XP_013683812.1 uncharacterized protein BNAC02G10870D isoform X1 [Brassica napus] &gt;CAF1892280.1 unnamed protein product [Brassica napus]
TRINITY_DN101483_c0_g1	317	-	-	-	-	-	-	-
TRINITY_DN101485_c0_g1	337	-	-	-	-	-	-	-
TRINITY_DN101488_c0_g1	609	-	K00281	PF02347	34H2P	E	sp|Q8UFD6|GCSP_AGRFC Glycine dehydrogenase (decarboxylating) OS=Agrobacterium fabrum (strain C58 / ATCC 33970) OX=176299 GN=gcvP PE=3 SV=1	XP_003081763.2 Pyridoxal phosphate-dependent transferase, major region, subdomain 1 [Ostreococcus tauri] &gt;CEF99477.1 Pyridoxal phosphate-dependent transferase, major region, subdomain 1 [Ostreococcus tauri]
TRINITY_DN101490_c0_g1	427	GO:0097659;GO:0051173;GO:0031325;GO:0045935;GO:0040008;GO:0007275;GO:0010152;GO:0001067;GO:0045595;GO:0009987;GO:0044424;GO:0051171;GO:0048522;GO:0060255;GO:0006807;GO:0000977;GO:0010769;GO:1901363;GO:0090567;GO:0048481;GO:2000241;GO:0006351;GO:0065007;GO:0000003;GO:0043229;GO:0044237;GO:0000976;GO:1903508;GO:1901360;GO:0060284;GO:0048437;GO:2000112;GO:0051510;GO:0001012;GO:0048638;GO:0010628;GO:…	-	-	3HTYJ	K	sp|Q1PFC2|AGL66_ARATH Agamous-like MADS-box protein AGL66 OS=Arabidopsis thaliana OX=3702 GN=AGL66 PE=1 SV=1	CAE5964516.1 unnamed protein product [Arabidopsis arenosa]
TRINITY_DN101493_c0_g1	361	-	-	-	-	-	-	-
TRINITY_DN101494_c0_g1	603	-	-	PF02492	3HNM4	H	sp|Q8IUF1|CBWD2_HUMAN COBW domain-containing protein 2 OS=Homo sapiens OX=9606 GN=CBWD2 PE=2 SV=1	CAE5957591.1 unnamed protein product [Arabidopsis arenosa]
TRINITY_DN101495_c0_g1	336	-	-	-	-	-	-	-
TRINITY_DN101496_c0_g1	385	-	-	-	-	-	-	-
TRINITY_DN101498_c0_g1	386	-	-	-	-	-	-	-
TRINITY_DN101499_c0_g1	433	-	-	-	-	-	-	-
TRINITY_DN10149_c0_g1	2094	-	-	-	-	-	-	NP_683496.2 oxidoreductases, acting on NADH or NADPH [Arabidopsis thaliana] &gt;AEE35695.1 oxidoreductases, acting on NADH or NADPH [Arabidopsis thaliana] &gt;OAP11941.1 hypothetical protein AXX17_AT1G69700 [Arabidopsis thaliana] &gt;BAE98743.1 hypothetical protein [Arabidopsis thaliana] &gt;VYS51097.1 unnamed protein product [Arabidopsis thaliana]
TRINITY_DN1014_c0_g1	4469	GO:0044281;GO:1901360;GO:0000166;GO:0097367;GO:0035639;GO:0004812;GO:0044237;GO:0043229;GO:0032553;GO:0006807;GO:1901363;GO:0016874;GO:0044424;GO:0009987;GO:0009507;GO:1901576;GO:0032555;GO:0009059;GO:0044444;GO:0043226;GO:0006725;GO:0140098;GO:1901564;GO:0008150;GO:0030554;GO:0044238;GO:0003824;GO:0046872;GO:0005622;GO:0034660;GO:0044260;GO:0006399;GO:0017076;GO:0043043;GO:0009058;GO:0005886;GO:…	K01868	PF02824;PF07973;PF03129;PF00587	3HPVA	J	sp|O04630|SYTM1_ARATH Threonine--tRNA ligase, mitochondrial 1 OS=Arabidopsis thaliana OX=3702 GN=THRRS PE=1 SV=3	XP_006289423.1 threonine--tRNA ligase, mitochondrial 1 [Capsella rubella] &gt;EOA22321.1 hypothetical protein CARUB_v10002922mg [Capsella rubella]
TRINITY_DN101503_c0_g1	450	GO:0044424;GO:0009987;GO:0008152;GO:0006412;GO:0022626;GO:0010467;GO:0043228;GO:0034641;GO:0006518;GO:1901363;GO:0015935;GO:0006807;GO:0005737;GO:0043229;GO:0044237;GO:0044445;GO:0055044;GO:0003723;GO:0016020;GO:0071704;GO:0005198;GO:0043231;GO:0044464;GO:0005488;GO:0005623;GO:0022627;GO:0003735;GO:0043227;GO:0044249;GO:0043604;GO:0009506;GO:0043170;GO:0005911;GO:0019538;GO:0003729;GO:0009058;GO:…	K02976	PF01283	44TBU	J	sp|Q9LYK9|RS263_ARATH 40S ribosomal protein S26-3 OS=Arabidopsis thaliana OX=3702 GN=RPS26C PE=2 SV=1	XP_007017070.1 PREDICTED: 40S ribosomal protein S26-3 [Theobroma cacao] &gt;EOY34689.1 40S ribosomal protein S26-2 [Theobroma cacao]
TRINITY_DN101505_c0_g1	353	-	-	-	-	-	-	-
TRINITY_DN10150_c0_g1	1958	GO:0043167;GO:0044238;GO:0046872;GO:0005622;GO:0003674;GO:0009507;GO:0046483;GO:0046914;GO:0005739;GO:0044444;GO:0006725;GO:0043226;GO:0008150;GO:0043170;GO:0043412;GO:0000959;GO:0043227;GO:0005575;GO:0009536;GO:0016556;GO:0043229;GO:0044237;GO:1901360;GO:0005488;GO:0044464;GO:0005623;GO:0006397;GO:0050897;GO:0016071;GO:0043231;GO:0090304;GO:0016554;GO:0071704;GO:0043169;GO:0006396;GO:0080156;GO:…	-	-	3HPR5	S	sp|Q9LKA5|MORF8_ARATH Multiple organellar RNA editing factor 8, chloroplastic/mitochondrial OS=Arabidopsis thaliana OX=3702 GN=MORF8 PE=1 SV=1	XP_006407023.1 multiple organellar RNA editing factor 8, chloroplastic/mitochondrial [Eutrema salsugineum] &gt;ESQ48476.1 hypothetical protein EUTSA_v10020847mg [Eutrema salsugineum]
TRINITY_DN101511_c0_g1	1153	-	-	PF14223	3I1GT	L	sp|Q94HW2|POLR1_ARATH Retrovirus-related Pol polyprotein from transposon RE1 OS=Arabidopsis thaliana OX=3702 GN=RE1 PE=2 SV=1	AAK44121.1 putative retroelement pol polyprotein [Arabidopsis thaliana] &gt;AAL34266.1 putative retroelement pol polyprotein [Arabidopsis thaliana] &gt;BAD44515.1 putative retroelement pol polyprotein [Arabidopsis thaliana] &gt;BAD44526.1 putative retroelement pol polyprotein [Arabidopsis thaliana] &gt;BAF02210.1 putative retroelement pol polyprotein [Arabidopsis thaliana]
TRINITY_DN101512_c0_g1	353	-	-	-	-	-	-	-
TRINITY_DN101514_c0_g1	412	-	-	-	-	-	-	KAF6258187.1 armadillo-type protein [Scenedesmus sp. NREL 46B-D3]
TRINITY_DN101516_c0_g1	303	-	-	-	-	-	-	-
TRINITY_DN101518_c0_g1	377	-	-	-	-	-	-	-
TRINITY_DN10151_c0_g1	1495	GO:0051171;GO:0006807;GO:0005737;GO:0060255;GO:0034641;GO:0009451;GO:0006396;GO:0006139;GO:0010467;GO:0097659;GO:0009889;GO:0010556;GO:0008152;GO:0044424;GO:0009987;GO:0002097;GO:0016070;GO:1901360;GO:0005623;GO:0044464;GO:0043231;GO:2000112;GO:0090304;GO:0071704;GO:0065007;GO:0006351;GO:0016740;GO:0006400;GO:0043229;GO:0044237;GO:0016746;GO:0044260;GO:2001141;GO:0006355;GO:0008033;GO:0034654;GO:…	-	PF10483	3HUQR	K	sp|F4IQJ2|ELP5_ARATH Elongator complex protein 5 OS=Arabidopsis thaliana OX=3702 GN=ELP5 PE=1 SV=1	CAA0365217.1 unnamed protein product [Arabidopsis thaliana]
TRINITY_DN101520_c0_g1	318	-	K04739	-	34HF6	T	sp|P31320|KAPR_BLAEM cAMP-dependent protein kinase regulatory subunit OS=Blastocladiella emersonii OX=4808 GN=PKAR PE=2 SV=1	XP_030545825.1 cAMP-dependent protein kinase type I-alpha regulatory subunit-like [Rhodamnia argentea]
TRINITY_DN101521_c0_g1	422	-	-	-	-	-	sp|P21657|DAL81_YEAST Transcriptional activator protein DAL81 OS=Saccharomyces cerevisiae (strain ATCC 204508 / S288c) OX=559292 GN=DAL81 PE=1 SV=3	XP_023905216.1 transcriptional activator protein DAL81-like [Quercus suber]
TRINITY_DN101524_c0_g1	511	-	-	-	-	-	-	-
TRINITY_DN101525_c0_g1	639	-	-	PF03073	KOG3797	T	-	PTQ38551.1 hypothetical protein MARPO_0050s0023 [Marchantia polymorpha] &gt;BBN05330.1 hypothetical protein Mp_3g12180 [Marchantia polymorpha subsp. ruderalis]
TRINITY_DN101526_c0_g1	402	-	-	-	3HSUZ	D	-	-
TRINITY_DN10152_c0_g1	648	-	-	-	-	-	-	CAE5963188.1 unnamed protein product [Arabidopsis arenosa]
TRINITY_DN10152_c0_g2	562	-	-	-	-	-	-	XP_002887085.1 uncharacterized protein LOC9323150 [Arabidopsis lyrata subsp. lyrata] &gt;EFH63344.1 hypothetical protein ARALYDRAFT_475783 [Arabidopsis lyrata subsp. lyrata]
TRINITY_DN101532_c0_g1	383	-	-	-	3GEVM	S	-	CAE6075297.1 unnamed protein product [Arabidopsis arenosa]
TRINITY_DN10153_c0_g1	2003	-	K08624	PF00090;PF19028	KOG3538	O	sp|D3YXG0|HMCN1_MOUSE Hemicentin-1 OS=Mus musculus OX=10090 GN=Hmcn1 PE=1 SV=1	KAF6256296.1 hypothetical protein COO60DRAFT_1658704 [Scenedesmus sp. NREL 46B-D3]
TRINITY_DN10153_c0_g2	579	-	K08624	PF00090	-	-	sp|Q80ZF8|AGRB3_MOUSE Adhesion G protein-coupled receptor B3 OS=Mus musculus OX=10090 GN=Adgrb3 PE=1 SV=2	KAF6248359.1 hypothetical protein COO60DRAFT_1691714 [Scenedesmus sp. NREL 46B-D3]
TRINITY_DN10153_c0_g3	323	-	-	PF00090	-	-	-	KAF6256296.1 hypothetical protein COO60DRAFT_1658704 [Scenedesmus sp. NREL 46B-D3]
TRINITY_DN101541_c0_g1	957	-	-	-	-	-	-	-
TRINITY_DN101545_c0_g1	546	GO:0072521;GO:0055086;GO:0046700;GO:0044283;GO:0043229;GO:0044237;GO:0055044;GO:0044281;GO:0042742;GO:1901360;GO:0000166;GO:0048037;GO:0072330;GO:0010038;GO:0016051;GO:0034655;GO:0007275;GO:0016903;GO:0016053;GO:0006807;GO:1901135;GO:0032787;GO:0005576;GO:0051188;GO:0006793;GO:0009127;GO:0044248;GO:0044238;GO:0031967;GO:0006733;GO:0046872;GO:0009205;GO:0005622;GO:0046686;GO:0048856;GO:0009507;GO:…	K00134	PF00044;PF02800	3GAGX	G	sp|Q6BMK0|G3P_DEBHA Glyceraldehyde-3-phosphate dehydrogenase OS=Debaryomyces hansenii (strain ATCC 36239 / CBS 767 / BCRC 21394 / JCM 1990 / NBRC 0083 / IGC 2968) OX=284592 GN=GPD PE=3 SV=1	KAG6554838.1 hypothetical protein Mapa_003421 [Marchantia paleacea]
TRINITY_DN101546_c0_g1	675	-	-	-	-	-	-	-
TRINITY_DN101548_c0_g1	399	GO:0048869;GO:0016491;GO:0009968;GO:0016667;GO:0005783;GO:0044432;GO:0005737;GO:0019153;GO:2001242;GO:0043067;GO:0030154;GO:0008152;GO:0044424;GO:0009987;GO:0016671;GO:0055114;GO:0015037;GO:0048519;GO:0043066;GO:1902235;GO:0010648;GO:0005623;GO:0044464;GO:0015036;GO:0043231;GO:0032502;GO:0048583;GO:0060548;GO:0043229;GO:1902531;GO:1903573;GO:0043233;GO:0010941;GO:0080135;GO:0042592;GO:0065007;GO:…	K05360	PF13899	2RXP1	S	sp|H9D1R1|TXD12_EPICO Thioredoxin domain-containing protein 12 OS=Epinephelus coioides OX=94232 GN=Txndc12 PE=1 SV=1	GHP12358.1 hypothetical protein PPROV_001108600 [Pycnococcus provasolii]
TRINITY_DN10154_c0_g1	3230	-	-	-	-	-	-	VYS56265.1 unnamed protein product [Arabidopsis thaliana]
TRINITY_DN101550_c0_g1	352	GO:0003824;GO:1902494;GO:0044446;GO:0032991;GO:0044422;GO:0044238;GO:0005665;GO:0003676;GO:0034645;GO:0044428;GO:0005622;GO:0046483;GO:0009059;GO:0005634;GO:0003674;GO:0032774;GO:1901576;GO:0008150;GO:0140098;GO:0018130;GO:0044271;GO:0043226;GO:0006725;GO:1901362;GO:0070013;GO:0097747;GO:0043170;GO:0044249;GO:0043227;GO:0005515;GO:0005575;GO:0034654;GO:0031974;GO:0044260;GO:0001055;GO:0003677;GO:…	K03008	-	3GITF	K	sp|Q86JJ5|RPB11_DICDI DNA-directed RNA polymerase II subunit rpb11 OS=Dictyostelium discoideum OX=44689 GN=polr2j PE=3 SV=1	EOX96660.1 DNA-directed RNA polymerase II subunit RPB11 [Theobroma cacao]
TRINITY_DN101551_c0_g1	341	GO:0005746;GO:0016020;GO:0030964;GO:0098803;GO:0005740;GO:0044237;GO:0043229;GO:0045271;GO:0044464;GO:0005623;GO:0070469;GO:0043231;GO:0022900;GO:0031975;GO:0031090;GO:0009853;GO:0055114;GO:0008152;GO:0044424;GO:0009987;GO:0005743;GO:0098800;GO:0005747;GO:0005737;GO:0016021;GO:0098796;GO:0043094;GO:0031224;GO:0019866;GO:1902494;GO:0098798;GO:0044446;GO:0032991;GO:0044422;GO:0005622;GO:0031967;GO:…	-	PF08122	44M8X	S	-	-
TRINITY_DN101554_c0_g1	333	-	-	-	-	-	-	-
TRINITY_DN101556_c0_g1	407	GO:0009875;GO:0006904;GO:0022607;GO:0005575;GO:0140029;GO:0048278;GO:0001927;GO:0022406;GO:0043227;GO:0060321;GO:0008037;GO:0005911;GO:0071840;GO:0005886;GO:0009506;GO:0098876;GO:0005938;GO:0051234;GO:0044444;GO:0016043;GO:0099023;GO:0043226;GO:0007154;GO:0008150;GO:0051179;GO:0032501;GO:0031982;GO:0006810;GO:0005829;GO:0006893;GO:0005622;GO:0051704;GO:0005615;GO:0032991;GO:0030054;GO:0022414;GO:…	K17637	-	3HPTH	U	sp|Q8S3U9|SEC5A_ARATH Exocyst complex component SEC5A OS=Arabidopsis thaliana OX=3702 GN=SEC5A PE=1 SV=1	XP_019082685.1 PREDICTED: exocyst complex component SEC5A-like [Camelina sativa]
TRINITY_DN101557_c0_g1	505	GO:0065009;GO:0031338;GO:0098772;GO:0050789;GO:0005515;GO:0045184;GO:0032879;GO:0034613;GO:0017016;GO:0090630;GO:0008047;GO:0051049;GO:0071702;GO:0017137;GO:0043087;GO:0005575;GO:0051336;GO:0043547;GO:0043167;GO:0012505;GO:0005622;GO:0071705;GO:0046872;GO:0051020;GO:0050794;GO:0003674;GO:0030234;GO:0031267;GO:0006810;GO:0050790;GO:0051234;GO:0051649;GO:0051128;GO:0051179;GO:0008150;GO:0043169;GO:…	-	-	3HRMQ	U	-	-
TRINITY_DN101559_c0_g1	340	-	-	-	-	-	-	-
TRINITY_DN10155_c0_g1	866	GO:0003723;GO:0008380;GO:0000245;GO:0005730;GO:0071013;GO:0043233;GO:0034622;GO:0005689;GO:0043229;GO:0097525;GO:0044237;GO:1901360;GO:0032502;GO:0071826;GO:0016071;GO:0043231;GO:0071011;GO:0005685;GO:0005623;GO:0044464;GO:0005488;GO:0000377;GO:0006397;GO:0090304;GO:0044085;GO:0065003;GO:0120114;GO:0071704;GO:0031981;GO:0043933;GO:0043228;GO:0006139;GO:0006396;GO:0010467;GO:0009987;GO:0044424;GO:…	K11088	-	3HTRE	A	sp|Q9LM92|SMD3B_ARATH Small nuclear ribonucleoprotein SmD3b OS=Arabidopsis thaliana OX=3702 GN=SMD3B PE=2 SV=1	AAF79623.1 F5M15.9 [Arabidopsis thaliana]
TRINITY_DN101567_c0_g1	368	-	K14859	PF04427	34GZQ	J	sp|O14206|YDD3_SCHPO Brix domain-containing protein C1B9.03c OS=Schizosaccharomyces pombe (strain 972 / ATCC 24843) OX=284812 GN=SPAC1B9.03c PE=1 SV=2	PTQ32559.1 hypothetical protein MARPO_0097s0041 [Marchantia polymorpha] &gt;BBN13753.1 hypothetical protein Mp_6g06030 [Marchantia polymorpha subsp. ruderalis]
TRINITY_DN101568_c0_g1	308	-	-	-	-	-	-	-
TRINITY_DN10156_c0_g1	418	-	K18442	-	-	-	sp|F4JSZ5|BIG1_ARATH Brefeldin A-inhibited guanine nucleotide-exchange protein 1 OS=Arabidopsis thaliana OX=3702 GN=BIG1 PE=2 SV=1	XP_006411603.1 brefeldin A-inhibited guanine nucleotide-exchange protein 1 isoform X2 [Eutrema salsugineum] &gt;ESQ53056.1 hypothetical protein EUTSA_v10024199mg [Eutrema salsugineum]
TRINITY_DN101571_c0_g1	325	-	-	PF00181	34JF8	J	sp|Q5GSU7|RL2_WOLTR 50S ribosomal protein L2 OS=Wolbachia sp. subsp. Brugia malayi (strain TRS) OX=292805 GN=rplB PE=3 SV=1	KAF8068262.1 rplB [Scenedesmus sp. PABB004]
TRINITY_DN101572_c0_g1	310	GO:0005776;GO:0051179;GO:0006810;GO:0003674;GO:0051704;GO:0071705;GO:0032559;GO:0044267;GO:0004674;GO:0043167;GO:0034045;GO:0061919;GO:0097159;GO:0044403;GO:0036094;GO:0005575;GO:1901265;GO:0051701;GO:0098805;GO:0043170;GO:0019538;GO:0071704;GO:0036211;GO:0043231;GO:0031410;GO:0005488;GO:0005623;GO:0006796;GO:0000407;GO:0044464;GO:0032502;GO:0043168;GO:0005524;GO:0042886;GO:0016020;GO:0097708;GO:…	K08269	-	3GB7G	T	sp|P0CP71|ATG1_CRYNB Serine/threonine-protein kinase ATG1 OS=Cryptococcus neoformans var. neoformans serotype D (strain B-3501A) OX=283643 GN=ATG1 PE=3 SV=1	GBG63098.1 hypothetical protein CBR_g36585 [Chara braunii]
TRINITY_DN101575_c0_g1	325	-	K11975	PF00097	44UTF	O	-	-
TRINITY_DN101576_c0_g1	477	-	-	-	-	-	-	-
TRINITY_DN101578_c0_g1	379	-	-	-	34GU8	E	sp|F4KD71|DUR3_ARATH Urea-proton symporter DUR3 OS=Arabidopsis thaliana OX=3702 GN=DUR3 PE=1 SV=1	KAG2426166.1 hypothetical protein HXX76_013147 [Chlamydomonas incerta]
TRINITY_DN10157_c0_g1	530	GO:0044425;GO:0016773;GO:0016310;GO:0050776;GO:0009607;GO:0017076;GO:0052556;GO:0044260;GO:0097306;GO:0009738;GO:0052200;GO:0051707;GO:0005886;GO:0043412;GO:0071310;GO:0045088;GO:0030554;GO:0032501;GO:0052306;GO:0052509;GO:1901564;GO:0008150;GO:0052255;GO:0098542;GO:0002684;GO:0032555;GO:0044419;GO:0071396;GO:0045089;GO:0048856;GO:0006464;GO:0051817;GO:0003824;GO:0044238;GO:0048584;GO:0052031;GO:…	-	PF00139	3HTDA	T	sp|Q9M021|LRK62_ARATH L-type lectin-domain containing receptor kinase VI.2 OS=Arabidopsis thaliana OX=3702 GN=LECRK62 PE=2 SV=1	XP_019084622.1 PREDICTED: L-type lectin-domain containing receptor kinase VI.2 [Camelina sativa]
TRINITY_DN10157_c1_g1	1782	GO:0006793;GO:0016021;GO:1901363;GO:0032553;GO:0006807;GO:0008144;GO:0009987;GO:0008152;GO:0004672;GO:0006468;GO:0016772;GO:0140096;GO:0035639;GO:0097367;GO:0071704;GO:0036211;GO:0000166;GO:0071944;GO:0016301;GO:0005488;GO:0044464;GO:0006796;GO:0005623;GO:0016740;GO:0044237;GO:0043168;GO:0005524;GO:0016020;GO:0097159;GO:0016773;GO:0044425;GO:0016310;GO:0044260;GO:0017076;GO:0036094;GO:0005575;GO:…	-	PF00069;PF00139	3HTDA	T	sp|Q9SR87|LRK61_ARATH Probable L-type lectin-domain containing receptor kinase VI.1 OS=Arabidopsis thaliana OX=3702 GN=LECRK61 PE=2 SV=1	NP_187499.1 Concanavalin A-like lectin protein kinase family protein [Arabidopsis thaliana] &gt;Q9SR87.1 RecName: Full=Probable L-type lectin-domain containing receptor kinase VI.1; Short=LecRK-VI.1; Flags: Precursor [Arabidopsis thaliana] &gt;AAF07845.1 putative serine/threonine protein kinase [Arabidopsis thaliana] &gt;AEE74689.1 Concanavalin A-like lectin protein kinase family protein [Arabido…
TRINITY_DN10157_c1_g2	2313	GO:0005524;GO:0043168;GO:0009719;GO:0016020;GO:0033993;GO:0071704;GO:0071215;GO:0036211;GO:0032502;GO:0071944;GO:0044464;GO:0006796;GO:0005488;GO:0005623;GO:0042221;GO:0008144;GO:0008152;GO:0009845;GO:0009725;GO:0007165;GO:0006468;GO:0016772;GO:0070887;GO:0016021;GO:0097305;GO:0071229;GO:0032559;GO:0030246;GO:0050794;GO:0031224;GO:0043167;GO:1901701;GO:0044267;GO:0004674;GO:0090351;GO:0007154;GO:…	-	PF00139;PF00069	3HTDA	T	sp|Q9M020|LRK63_ARATH Lectin-domain containing receptor kinase VI.3 OS=Arabidopsis thaliana OX=3702 GN=LECRK63 PE=2 SV=1	CAA0400011.1 unnamed protein product [Arabidopsis thaliana]
TRINITY_DN101581_c0_g1	376	-	-	-	-	-	-	-
TRINITY_DN101583_c0_g1	372	-	-	-	-	-	-	-
TRINITY_DN101589_c0_g1	449	-	K04079	PF00183	34H57	O	sp|Q76LV1|HS90B_BOVIN Heat shock protein HSP 90-beta OS=Bos taurus OX=9913 GN=HSP90AB1 PE=2 SV=3	XP_030551190.1 heat shock protein HSP 90-alpha-like [Rhodamnia argentea]
TRINITY_DN10158_c0_g1	1643	GO:0019222;GO:0044260;GO:0005575;GO:0032446;GO:0010468;GO:0031326;GO:0043227;GO:0006417;GO:0043170;GO:0019538;GO:0043412;GO:0050789;GO:0043226;GO:0044444;GO:0009266;GO:1901564;GO:0008150;GO:0080090;GO:0005739;GO:0005634;GO:0009628;GO:0005622;GO:0090406;GO:0006464;GO:0050794;GO:0044238;GO:0031323;GO:0042995;GO:0044267;GO:0051246;GO:0034248;GO:0006807;GO:0005737;GO:0060255;GO:0051171;GO:0009987;GO:…	K10295	PF12937;PF19270	3HTPA	S	sp|Q9XI00|SKI32_ARATH F-box protein 7 OS=Arabidopsis thaliana OX=3702 GN=SKIP32 PE=1 SV=1	XP_009149698.1 F-box protein 7 isoform X1 [Brassica rapa] &gt;XP_009149699.1 F-box protein 7 isoform X2 [Brassica rapa] &gt;XP_013642367.1 F-box protein 7 isoform X1 [Brassica napus] &gt;XP_013642368.1 F-box protein 7 isoform X2 [Brassica napus]
TRINITY_DN101594_c0_g1	620	-	-	-	-	-	-	-
TRINITY_DN101597_c0_g1	387	GO:0005622;GO:0046686;GO:0046394;GO:0031967;GO:0051704;GO:0044238;GO:1901566;GO:0005615;GO:0044422;GO:0044446;GO:0009081;GO:0003824;GO:0043226;GO:0098542;GO:0044434;GO:0044444;GO:1901564;GO:0008150;GO:0009636;GO:1901576;GO:0009507;GO:0044419;GO:0003674;GO:0006549;GO:0043436;GO:0005739;GO:0043227;GO:0044249;GO:0006952;GO:0019752;GO:0051707;GO:0009058;GO:0009607;GO:0009579;GO:0006082;GO:1901605;GO:…	-	PF01042	3KZEP	J	sp|Q94JQ4|RIDA_ARATH Reactive Intermediate Deaminase A, chloroplastic OS=Arabidopsis thaliana OX=3702 GN=RIDA PE=1 SV=1	XP_008806405.2 reactive Intermediate Deaminase A, chloroplastic isoform X1 [Phoenix dactylifera]
TRINITY_DN101598_c0_g1	688	-	-	PF02338	-	-	-	-
TRINITY_DN101599_c0_g1	304	-	K02927	-	3GHWG	J	sp|P0CH06|RL401_SCHPO Ubiquitin-60S ribosomal protein L40 OS=Schizosaccharomyces pombe (strain 972 / ATCC 24843) OX=284812 GN=ubi1 PE=1 SV=1	BAK05232.1 predicted protein [Hordeum vulgare subsp. vulgare]
TRINITY_DN10159_c0_g1	1074	GO:0071944;GO:0120025;GO:0005488;GO:0071704;GO:0061458;GO:0016020;GO:1901419;GO:0043207;GO:0048518;GO:0005524;GO:0018108;GO:0003006;GO:0009787;GO:0002229;GO:0022414;GO:1902288;GO:0048316;GO:0043900;GO:0070887;GO:0004713;GO:0001653;GO:0008144;GO:0009845;GO:0007165;GO:0006468;GO:0009791;GO:0009960;GO:0031224;GO:1901701;GO:0004674;GO:0044267;GO:0090351;GO:0002239;GO:0031349;GO:0009793;GO:0051704;GO:…	-	-	3HXTM	T	sp|C0LGD8|Y1755_ARATH Probable LRR receptor-like serine/threonine-protein kinase At1g07550 OS=Arabidopsis thaliana OX=3702 GN=At1g07550 PE=1 SV=1	AAF79546.1 F22G5.7 [Arabidopsis thaliana]
TRINITY_DN1015_c0_g1	1455	GO:0003824;GO:0009056;GO:0016788;GO:0003674;GO:0052689;GO:0016787;GO:0008150;GO:0008152	-	PF07859	3HY8C	V	sp|Q9SX25|CXE6_ARATH Probable carboxylesterase 6 OS=Arabidopsis thaliana OX=3702 GN=CXE6 PE=2 SV=1	CAE5963451.1 unnamed protein product [Arabidopsis arenosa]
TRINITY_DN101602_c0_g1	304	-	K11446	PF02928	34JE7	K	-	GBF91629.1 hypothetical protein Rsub_04369 [Raphidocelis subcapitata]
TRINITY_DN101605_c0_g1	781	-	-	-	-	-	-	-
TRINITY_DN101606_c0_g1	401	-	-	-	-	-	-	-
TRINITY_DN101608_c0_g1	358	GO:0030234;GO:0050790;GO:0005829;GO:0005634;GO:0003674;GO:0080090;GO:1901564;GO:0008150;GO:0019941;GO:0044444;GO:0043226;GO:1902494;GO:0030054;GO:0051246;GO:0032991;GO:0044248;GO:0044267;GO:0044238;GO:1905368;GO:0000502;GO:0005622;GO:0005575;GO:0044260;GO:0008541;GO:0006511;GO:0019222;GO:0005886;GO:0050789;GO:0009506;GO:0098772;GO:0019538;GO:0005911;GO:0043170;GO:0044257;GO:0065009;GO:0043227;GO:…	K03033	-	3I5ZQ	O	sp|Q9LNU4|PSD3A_ARATH 26S proteasome non-ATPase regulatory subunit 3 homolog A OS=Arabidopsis thaliana OX=3702 GN=RPN3A PE=1 SV=3	XP_010498455.1 PREDICTED: 26S proteasome non-ATPase regulatory subunit 3 homolog A [Camelina sativa]
TRINITY_DN101609_c0_g1	373	-	-	-	-	-	-	-
TRINITY_DN10160_c0_g1	944	GO:0031301;GO:0015833;GO:0070727;GO:0042887;GO:0030150;GO:0051641;GO:0022857;GO:0005737;GO:0016021;GO:0008104;GO:0098796;GO:0031090;GO:0031975;GO:0072594;GO:0033036;GO:0015031;GO:0044424;GO:0009987;GO:0098800;GO:0005743;GO:0046907;GO:0044743;GO:0031304;GO:0043231;GO:0044464;GO:0005623;GO:0007005;GO:0005744;GO:0016020;GO:0006886;GO:0005740;GO:0042886;GO:0031300;GO:0006996;GO:0043229;GO:0005215;GO:…	K17794	PF02466	3I29U	U	sp|Q9LNQ1|TI231_ARATH Mitochondrial import inner membrane translocase subunit TIM23-1 OS=Arabidopsis thaliana OX=3702 GN=TIM23-1 PE=2 SV=1	XP_002890232.2 mitochondrial import inner membrane translocase subunit TIM23-1 [Arabidopsis lyrata subsp. lyrata]
TRINITY_DN10160_c0_g2	1165	GO:0017038;GO:1904680;GO:0003674;GO:0005739;GO:0006810;GO:0016043;GO:0006626;GO:0043226;GO:0098573;GO:0051234;GO:0044444;GO:0051649;GO:0008150;GO:0051179;GO:0031224;GO:0065002;GO:0031305;GO:0032991;GO:0044422;GO:0006839;GO:0019866;GO:0098798;GO:0008565;GO:0072655;GO:0044446;GO:0071705;GO:0005622;GO:0070585;GO:0055085;GO:0015405;GO:0031967;GO:0006605;GO:0071806;GO:0071702;GO:1990542;GO:0032592;GO:…	K17794	PF02466	3HZBK	U	sp|Q38820|TI232_ARATH Mitochondrial import inner membrane translocase subunit TIM23-2 OS=Arabidopsis thaliana OX=3702 GN=TIM23-2 PE=1 SV=1	CAE5963928.1 unnamed protein product [Arabidopsis arenosa]
TRINITY_DN101610_c0_g1	323	GO:0009791;GO:0018130;GO:0044271;GO:0005634;GO:0048467;GO:0046483;GO:0080134;GO:0034645;GO:0050794;GO:0009793;GO:0010154;GO:0019438;GO:0048608;GO:0005575;GO:2001141;GO:0031326;GO:0010468;GO:0019219;GO:0009790;GO:1901362;GO:0099402;GO:0050789;GO:0043170;GO:0048827;GO:0071704;GO:0061458;GO:0090304;GO:0048367;GO:0035670;GO:0043231;GO:0005623;GO:0044464;GO:0032502;GO:0034641;GO:0047484;GO:0022414;GO:…	-	-	3GXUI	K	sp|Q0WVM7|SLK1_ARATH Probable transcriptional regulator SLK1 OS=Arabidopsis thaliana OX=3702 GN=SLK1 PE=1 SV=1	NP_680741.5 SEUSS-like 3 [Arabidopsis thaliana] &gt;F4JT98.1 RecName: Full=Probable transcriptional regulator SLK3; Short=AtSLK3; AltName: Full=Protein SEUSS-like 3 [Arabidopsis thaliana] &gt;AEE85072.1 SEUSS-like 3 [Arabidopsis thaliana]
TRINITY_DN101614_c0_g1	832	GO:0008150;GO:1901564;GO:0043603;GO:0044444;GO:0043226;GO:0044271;GO:0043232;GO:0005829;GO:0009059;GO:0003674;GO:1901576;GO:0009507;GO:0003676;GO:0034645;GO:0005622;GO:0044446;GO:0098588;GO:0030054;GO:0044422;GO:0032991;GO:0044391;GO:1901566;GO:0044267;GO:0005774;GO:0044238;GO:0003729;GO:0097159;GO:0043043;GO:0009058;GO:0005575;GO:0005840;GO:0009536;GO:0044260;GO:0005773;GO:1990904;GO:0044437;GO:…	K02883	-	3GBUI	J	sp|P42791|RL182_ARATH 60S ribosomal protein L18-2 OS=Arabidopsis thaliana OX=3702 GN=RPL18B PE=1 SV=2	PIA44334.1 hypothetical protein AQUCO_01700140v1 [Aquilegia coerulea]
TRINITY_DN101615_c0_g1	301	-	K00856	PF00294	34K0Y	G	sp|Q9LZG0|ADK2_ARATH Adenosine kinase 2 OS=Arabidopsis thaliana OX=3702 GN=ADK2 PE=1 SV=1	KAF6257524.1 Ribokinase-like protein [Scenedesmus sp. NREL 46B-D3]
TRINITY_DN10161_c0_g1	399	GO:0003824;GO:0048856;GO:0009888;GO:0005622;GO:0016740;GO:0032989;GO:0016746;GO:0032502;GO:1901576;GO:0003674;GO:0009059;GO:0005829;GO:0090558;GO:0044464;GO:0005623;GO:0016043;GO:0090626;GO:0000904;GO:0044444;GO:0048468;GO:0071704;GO:0010143;GO:0009653;GO:0051179;GO:0008150;GO:0043170;GO:0071840;GO:0044424;GO:0009987;GO:0008152;GO:0030154;GO:0010090;GO:0010026;GO:0005737;GO:0005575;GO:0000902;GO:…	-	PF02458	3HX3B	S	-	CAE6085367.1 unnamed protein product [Arabidopsis arenosa]
TRINITY_DN101625_c0_g1	1284	-	-	-	-	-	-	KAF8062629.1 hypothetical protein HT031_003958 [Scenedesmus sp. PABB004]
TRINITY_DN101626_c0_g1	329	-	-	-	-	-	-	-
TRINITY_DN101627_c0_g1	331	GO:0003674;GO:0005887;GO:1904680;GO:0071944;GO:0006810;GO:0005623;GO:0044464;GO:0051234;GO:0051179;GO:0008150;GO:0031226;GO:0031224;GO:0016020;GO:0042886;GO:0055085;GO:0071705;GO:0006857;GO:0005215;GO:0042887;GO:0071702;GO:0015833;GO:0005575;GO:0022857;GO:0008104;GO:0016021;GO:0035673;GO:0044459;GO:0044425;GO:0035672;GO:0005886;GO:0033036;GO:0015031;GO:0045184	-	PF03169	3HP48	T	sp|Q9SUA4|OPT5_ARATH Oligopeptide transporter 5 OS=Arabidopsis thaliana OX=3702 GN=OPT5 PE=2 SV=1	ESQ54616.1 hypothetical protein EUTSA_v10024804mg [Eutrema salsugineum]
TRINITY_DN101628_c0_g1	650	-	-	-	-	-	-	GBF88051.1 hypothetical protein Rsub_00763 [Raphidocelis subcapitata]
TRINITY_DN101629_c0_g1	474	-	-	-	-	-	-	-
TRINITY_DN10162_c0_g1	352	GO:0003674;GO:0046914;GO:0005634;GO:0043231;GO:0044464;GO:0005623;GO:0005488;GO:0005575;GO:0043226;GO:0003677;GO:0097159;GO:1901363;GO:0008270;GO:0043167;GO:0043169;GO:0005622;GO:0044424;GO:0046872;GO:0043227;GO:0043229;GO:0003676	-	-	3HNQ0	O	-	-
TRINITY_DN10162_c0_g2	301	GO:0044424;GO:0005622;GO:0046872;GO:0043229;GO:0043227;GO:0003676;GO:0043169;GO:0043167;GO:0043226;GO:1901363;GO:0097159;GO:0003677;GO:0008270;GO:0003674;GO:0043231;GO:0005634;GO:0046914;GO:0044464;GO:0005623;GO:0005488;GO:0005575	-	-	3HNQ0	O	-	KAF8106721.1 hypothetical protein N665_0134s0009 [Sinapis alba]
TRINITY_DN10162_c1_g1	313	GO:0090304;GO:2000112;GO:0071704;GO:1901360;GO:0005488;GO:0044464;GO:0005623;GO:0043231;GO:0043229;GO:0044237;GO:0065007;GO:0006351;GO:1901363;GO:0034641;GO:0051171;GO:0006807;GO:0060255;GO:0010556;GO:0008152;GO:0009987;GO:0044424;GO:0016070;GO:0006139;GO:0010467;GO:0097659;GO:0009889;GO:0051252;GO:0043226;GO:0006725;GO:0044271;GO:0008150;GO:0018130;GO:0032774;GO:0003674;GO:1901576;GO:0080090;GO:…	-	-	3GK30	K	sp|Q9LVG1|Y5013_ARATH B3 domain-containing protein At5g60130 OS=Arabidopsis thaliana OX=3702 GN=At5g60130 PE=2 SV=1	XP_024012486.1 B3 domain-containing protein At5g60130-like [Eutrema salsugineum]
TRINITY_DN10162_c1_g2	305	GO:0097159;GO:0003677;GO:0019438;GO:0009058;GO:0019222;GO:0044260;GO:2001141;GO:0006355;GO:0034654;GO:0005575;GO:1903506;GO:0010468;GO:0019219;GO:0044249;GO:0043227;GO:0031326;GO:0043170;GO:0050789;GO:1901362;GO:0051252;GO:0043226;GO:0006725;GO:0044271;GO:0008150;GO:0018130;GO:0003674;GO:0032774;GO:1901576;GO:0080090;GO:0046483;GO:0009059;GO:0005634;GO:0005622;GO:0050794;GO:0003676;GO:0034645;GO:…	-	PF02362	3GK30	K	sp|Q9LVG1|Y5013_ARATH B3 domain-containing protein At5g60130 OS=Arabidopsis thaliana OX=3702 GN=At5g60130 PE=2 SV=1	CAE6250866.1 unnamed protein product [Arabidopsis arenosa]
TRINITY_DN101633_c0_g1	313	-	-	-	44RHD	O	-	-
TRINITY_DN101635_c0_g1	514	-	-	-	-	-	-	-
TRINITY_DN101636_c0_g1	359	-	-	-	-	-	-	-
TRINITY_DN101637_c0_g1	537	-	-	-	-	-	-	-
TRINITY_DN101638_c0_g1	301	-	-	-	-	-	-	-
TRINITY_DN10163_c0_g1	1101	GO:0098805;GO:0001883;GO:0034613;GO:0045184;GO:1901265;GO:0043227;GO:0033365;GO:0019867;GO:0071702;GO:0006605;GO:0005575;GO:0017076;GO:0036094;GO:0009536;GO:0097159;GO:0044425;GO:0043167;GO:0031224;GO:0003824;GO:0072598;GO:0044446;GO:0044422;GO:0098588;GO:0046872;GO:0071705;GO:0005622;GO:0031967;GO:0003674;GO:0009507;GO:0006810;GO:0032555;GO:0051234;GO:0044444;GO:0005525;GO:0044434;GO:0043226;GO:…	-	PF11886	3HNBY	S	sp|Q9LUS2|TC120_ARATH Translocase of chloroplast 120, chloroplastic OS=Arabidopsis thaliana OX=3702 GN=TOC120 PE=1 SV=1	CAE5967520.1 unnamed protein product [Arabidopsis arenosa]
TRINITY_DN101649_c0_g1	531	-	-	-	-	-	-	-
TRINITY_DN101651_c0_g1	1199	GO:0009962;GO:0005737;GO:0060918;GO:0005783;GO:0016747;GO:0009733;GO:0009889;GO:0031090;GO:0009611;GO:0050896;GO:0010817;GO:0009416;GO:0009725;GO:0044424;GO:0042221;GO:0008152;GO:0006950;GO:0043231;GO:0001101;GO:0005623;GO:0044464;GO:0009411;GO:0071704;GO:0016020;GO:0009719;GO:0065007;GO:0043229;GO:0016746;GO:0016740;GO:0009813;GO:0006979;GO:0005575;GO:0044437;GO:0010033;GO:0005773;GO:0019222;GO:…	K00660	PF00195;PF02797	3HN0B	H	sp|Q9SEP2|CHSY_CARAN Chalcone synthase OS=Cardamine amara OX=50461 GN=CHS PE=3 SV=1	ABF68856.1 chalcone synthase, partial [Cardamine maritima] &gt;ABF68857.1 chalcone synthase, partial [Cardamine serbica] &gt;ABF68869.1 chalcone synthase, partial [Cardamine monteluccii]
TRINITY_DN101653_c0_g1	322	GO:0005488;GO:0090558;GO:0051239;GO:0003674;GO:0032502;GO:0010374;GO:0008150;GO:0009791;GO:0010016;GO:0048581;GO:0032501;GO:0009653;GO:0048367;GO:0090626;GO:0010052;GO:0065007;GO:0010103;GO:0019901;GO:0009888;GO:0048856;GO:0005575;GO:2000026;GO:0019900;GO:0048869;GO:0005576;GO:0050793;GO:2000038;GO:0051241;GO:0090698;GO:0050789;GO:0048580;GO:0051093;GO:0048519;GO:0090627;GO:0007275;GO:0030154;GO:…	-	-	3HV48	S	sp|Q8LC53|EPF2_ARATH Protein EPIDERMAL PATTERNING FACTOR 2 OS=Arabidopsis thaliana OX=3702 GN=EPF2 PE=1 SV=1	XP_010478856.1 PREDICTED: protein EPIDERMAL PATTERNING FACTOR 2 isoform X1 [Camelina sativa]
TRINITY_DN101655_c0_g1	405	-	-	-	-	-	-	-
TRINITY_DN101656_c0_g1	571	-	-	-	-	-	-	-
TRINITY_DN101657_c0_g1	436	-	-	-	-	-	-	-
TRINITY_DN101662_c0_g1	326	-	-	-	-	-	-	-
TRINITY_DN101664_c0_g1	712	-	-	-	-	-	-	-
TRINITY_DN10166_c0_g1	1701	GO:0005623;GO:0046854;GO:0005488;GO:0044464;GO:0006796;GO:0043231;GO:0071704;GO:0044255;GO:0046488;GO:0019637;GO:0006629;GO:0044237;GO:0043229;GO:0006644;GO:0005737;GO:0008252;GO:0006793;GO:0043169;GO:0042578;GO:0008152;GO:0009987;GO:0044424;GO:0016787;GO:0003674;GO:0009507;GO:0005739;GO:0044444;GO:0043226;GO:0030258;GO:0008150;GO:0043167;GO:0006650;GO:0044238;GO:0003824;GO:0016791;GO:0016311;GO:…	K01082	PF00459	3HTHB	FP	sp|Q9M0Y6|DPNPM_ARATH Putative PAP-specific phosphatase, mitochondrial OS=Arabidopsis thaliana OX=3702 GN=At4g05090 PE=2 SV=1	CAE6136995.1 unnamed protein product [Arabidopsis arenosa]
TRINITY_DN10166_c1_g1	320	-	-	-	-	-	-	-
TRINITY_DN101670_c0_g1	441	-	K00854	PF02782	34HBU	G	sp|P44401|XYLB_HAEIN Xylulose kinase OS=Haemophilus influenzae (strain ATCC 51907 / DSM 11121 / KW20 / Rd) OX=71421 GN=xylB PE=3 SV=1	PSC70198.1 Xylulokinase [Micractinium conductrix]
TRINITY_DN101673_c0_g1	460	GO:0043549;GO:0033993;GO:0042428;GO:0009873;GO:0043231;GO:0010035;GO:0044464;GO:0001505;GO:0005623;GO:0019220;GO:0043085;GO:0043168;GO:0009719;GO:0006469;GO:0009605;GO:0045859;GO:0009893;GO:0071369;GO:0051726;GO:0006568;GO:0042221;GO:0019887;GO:0008152;GO:0009725;GO:0006587;GO:0048519;GO:0000075;GO:0007154;GO:0019207;GO:0042133;GO:0009266;GO:0004623;GO:0042427;GO:0003674;GO:0005739;GO:0009628;GO:…	K06630	PF00244	34K7I	O	sp|P52908|1433_CHLRE 14-3-3-like protein OS=Chlamydomonas reinhardtii OX=3055 PE=2 SV=1	AAX86042.1 14-3-3 protein [Haematococcus lacustris]
TRINITY_DN101674_c0_g1	1288	GO:0006793;GO:1901363;GO:0034220;GO:0015078;GO:1901135;GO:0006807;GO:0009987;GO:0044424;GO:0005743;GO:0031090;GO:0009199;GO:0031975;GO:0006812;GO:0098655;GO:0055114;GO:0048037;GO:0016676;GO:0046906;GO:0045277;GO:1901360;GO:0044281;GO:0070469;GO:0070069;GO:0015672;GO:0043229;GO:0044237;GO:0055086;GO:0072521;GO:0005740;GO:0031966;GO:0008324;GO:0044425;GO:0015077;GO:0016310;GO:0046034;GO:0009161;GO:…	K02256	-	3IAIW	C	sp|O21079|COX1_MYXGL Cytochrome c oxidase subunit 1 OS=Myxine glutinosa OX=7769 GN=MT-CO1 PE=3 SV=2	YP_006666415.1 cytochrome c oxidase subunit 1, partial [Trebouxiophyceae sp. MX-AZ01] &gt;AFQ93770.1 cytochrome c oxidase subunit 1, partial [Trebouxiophyceae sp. MX-AZ01]
TRINITY_DN101675_c0_g1	347	-	-	-	-	-	sp|Q8BP47|SYNC_MOUSE Asparagine--tRNA ligase, cytoplasmic OS=Mus musculus OX=10090 GN=NARS1 PE=1 SV=2	-
TRINITY_DN101677_c0_g1	305	-	-	-	-	-	-	-
TRINITY_DN101678_c0_g1	347	-	-	-	-	-	-	-
TRINITY_DN10167_c0_g1	1420	GO:0003735;GO:0005623;GO:0044464;GO:0005198;GO:0071704;GO:0044445;GO:0043229;GO:0044237;GO:0006807;GO:0005737;GO:0006518;GO:0034641;GO:0043228;GO:0010467;GO:0022626;GO:0008152;GO:0006412;GO:0044424;GO:0009987;GO:0003674;GO:1901576;GO:0005829;GO:0009059;GO:0043603;GO:0044444;GO:0043226;GO:0044271;GO:0043232;GO:1901564;GO:0008150;GO:0044267;GO:1901566;GO:0044391;GO:0044238;GO:0044446;GO:0044422;GO:…	K02879	-	3HW7H	J	-	XP_006288819.1 uncharacterized protein LOC17882399 [Capsella rubella] &gt;EOA21717.1 hypothetical protein CARUB_v10002154mg [Capsella rubella]
TRINITY_DN101680_c0_g1	593	-	K02993	PF01251	34JUJ	J	sp|P02362|RS7_XENLA 40S ribosomal protein S7 OS=Xenopus laevis OX=8355 GN=rps7 PE=2 SV=2	KAF8069398.1 hypothetical protein HT031_001513 [Scenedesmus sp. PABB004]
TRINITY_DN101681_c0_g1	317	GO:0051186;GO:0044238;GO:0003824;GO:0005622;GO:0016615;GO:0006733;GO:0006091;GO:0006107;GO:0003674;GO:0043436;GO:0046483;GO:0006725;GO:0006101;GO:0017144;GO:1901564;GO:0008150;GO:0015980;GO:0019752;GO:0005886;GO:0045333;GO:0019674;GO:0019362;GO:0009117;GO:0072350;GO:0005575;GO:0006082;GO:0006734;GO:0030060;GO:0016020;GO:0055086;GO:0016616;GO:0019637;GO:0005975;GO:0044237;GO:1901360;GO:0006732;GO:…	K00025	PF00056	3GAE1	C	sp|P61977|MDH_THET2 Malate dehydrogenase OS=Thermus thermophilus (strain ATCC BAA-163 / DSM 7039 / HB27) OX=262724 GN=mdh PE=3 SV=1	KAE8726158.1 malate dehydrogenase [Hibiscus syriacus]
TRINITY_DN101686_c0_g1	374	GO:0009607;GO:0043043;GO:0009058;GO:0002376;GO:0044260;GO:1990904;GO:0005773;GO:0022607;GO:0005840;GO:0000027;GO:0031974;GO:0022618;GO:0005844;GO:0044249;GO:0043227;GO:0022625;GO:0051707;GO:0071840;GO:0044444;GO:0043226;GO:0098542;GO:0043232;GO:0044434;GO:0008150;GO:1901564;GO:0070925;GO:1901576;GO:0009507;GO:0009059;GO:0005622;GO:0003676;GO:0031967;GO:0010224;GO:0071478;GO:0044391;GO:0044238;GO:…	K02866	PF00252	3IM35	J	sp|Q2TBW8|RL10L_BOVIN 60S ribosomal protein L10-like OS=Bos taurus OX=9913 GN=RPL10L PE=2 SV=1	KAF1855571.1 hypothetical protein Lal_00045071 [Lupinus albus]
TRINITY_DN101687_c0_g1	360	-	-	-	-	-	-	-
TRINITY_DN101691_c0_g1	543	-	-	PF00564	-	-	-	-
TRINITY_DN101692_c0_g1	322	-	-	-	-	-	-	-
TRINITY_DN101695_c0_g1	465	-	K02938	-	34J2T	J	sp|P41116|RL8_XENLA 60S ribosomal protein L8 OS=Xenopus laevis OX=8355 GN=rpl8 PE=2 SV=3	XP_030550453.1 60S ribosomal protein L8-like [Rhodamnia argentea]
TRINITY_DN101699_c0_g1	372	-	-	-	-	-	-	-
TRINITY_DN10169_c0_g1	1008	GO:0005576;GO:0006099;GO:0005737;GO:0016999;GO:0048366;GO:0007275;GO:0048046;GO:0008152;GO:0044424;GO:0009987;GO:0009060;GO:0055114;GO:0050896;GO:0071496;GO:0043933;GO:0071704;GO:0031667;GO:0015977;GO:0065003;GO:0048367;GO:0044085;GO:0005623;GO:0044464;GO:0006950;GO:0043231;GO:0044281;GO:0032502;GO:0043229;GO:0044237;GO:0009605;GO:0051716;GO:0051259;GO:0004611;GO:0006082;GO:0031669;GO:0016830;GO:…	K01595	PF00311	3HVUA	C	sp|Q9MAH0|CAPP1_ARATH Phosphoenolpyruvate carboxylase 1 OS=Arabidopsis thaliana OX=3702 GN=PPC1 PE=1 SV=1	XP_018450814.1 PREDICTED: phosphoenolpyruvate carboxylase 1 [Raphanus sativus] &gt;XP_018450815.1 PREDICTED: phosphoenolpyruvate carboxylase 1 [Raphanus sativus]
TRINITY_DN1016_c0_g1	3682	GO:0015631;GO:0005856;GO:0005488;GO:0044464;GO:0005623;GO:0099080;GO:0006996;GO:0008352;GO:0000151;GO:0043229;GO:0007010;GO:0000226;GO:0005874;GO:0007017;GO:0005737;GO:0009987;GO:0044424;GO:0008017;GO:0099081;GO:0099512;GO:0044450;GO:0031461;GO:0015630;GO:0043228;GO:0044444;GO:0043232;GO:0016043;GO:0043226;GO:0008150;GO:0008092;GO:0003674;GO:0051013;GO:0080008;GO:0005622;GO:0044430;GO:1902494;GO:…	K18643	PF00400	3HZF1	Z	sp|Q8H0T9|KTN84_ARATH Katanin p80 WD40 repeat-containing subunit B1 homolog KTN80.4 OS=Arabidopsis thaliana OX=3702 GN=KTN80.4 PE=1 SV=3	XP_024007198.1 katanin p80 WD40 repeat-containing subunit B1 homolog isoform X1 [Eutrema salsugineum]
TRINITY_DN101704_c0_g1	397	-	-	-	-	-	-	XP_020881001.1 LOW QUALITY PROTEIN: uncharacterized protein LOC110228331 [Arabidopsis lyrata subsp. lyrata]
TRINITY_DN101708_c0_g1	394	-	K14207	PF01490	3IE29	E	-	TVU08224.1 hypothetical protein EJB05_41621 [Eragrostis curvula]
TRINITY_DN101709_c0_g1	672	-	-	-	3HNA3	S	-	XP_018471184.1 PREDICTED: deSI-like protein At4g17486 [Raphanus sativus]
TRINITY_DN10170_c0_g1	1769	-	-	PF07839	3HVH9	S	-	CAE6252727.1 unnamed protein product [Arabidopsis arenosa]
TRINITY_DN10170_c0_g2	1896	-	-	PF07839	3HVH9	S	-	CAE6252727.1 unnamed protein product [Arabidopsis arenosa]
TRINITY_DN101711_c0_g1	984	GO:0044432;GO:0005737;GO:0003006;GO:0008219;GO:0010623;GO:0097708;GO:0005783;GO:0022414;GO:0030163;GO:0008234;GO:0000323;GO:0009505;GO:0009626;GO:0008152;GO:0030154;GO:0043231;GO:0031410;GO:0005623;GO:0044464;GO:0032502;GO:0071944;GO:0071704;GO:0004197;GO:0061458;GO:1901575;GO:0048367;GO:0048468;GO:0043233;GO:0009605;GO:0048443;GO:0043207;GO:0048658;GO:0008233;GO:0048229;GO:0048608;GO:0005575;GO:…	K16292	PF00112;PF08246	3HQ9R	O	sp|Q9FGR9|CEP1_ARATH KDEL-tailed cysteine endopeptidase CEP1 OS=Arabidopsis thaliana OX=3702 GN=CEP1 PE=1 SV=1	CAA0408850.1 unnamed protein product [Arabidopsis thaliana] &gt;CAD5334502.1 unnamed protein product [Arabidopsis thaliana] &gt;VYS69892.1 unnamed protein product [Arabidopsis thaliana]
TRINITY_DN101714_c0_g1	354	-	-	-	-	-	-	-
TRINITY_DN101718_c0_g1	340	-	-	-	-	-	-	XP_019084151.1 PREDICTED: uncharacterized protein LOC109125874 [Camelina sativa]
TRINITY_DN10171_c0_g1	1745	-	-	-	3HXEX	S	-	CAA7062055.1 unnamed protein product [Microthlaspi erraticum]
TRINITY_DN10171_c1_g1	1641	-	K17966	PF06979	3HVJ5	S	-	CAE6031669.1 unnamed protein product [Arabidopsis arenosa]
TRINITY_DN101721_c0_g1	411	-	-	-	-	-	-	-
TRINITY_DN101724_c0_g1	406	-	-	-	-	-	-	-
TRINITY_DN101725_c0_g1	472	GO:0005524;GO:0043168;GO:0043229;GO:0055044;GO:0042886;GO:0016020;GO:0016192;GO:0097367;GO:0035639;GO:0005623;GO:0005488;GO:0044464;GO:0043231;GO:0071944;GO:0000166;GO:0016787;GO:0044424;GO:0008144;GO:0015031;GO:0033036;GO:0043169;GO:0008104;GO:1901363;GO:0005737;GO:0032553;GO:0015833;GO:0046872;GO:0071705;GO:0005622;GO:0032559;GO:0003824;GO:0030054;GO:0043167;GO:0012505;GO:0051179;GO:0008150;GO:…	K06027	PF00004	3HPQF	O	sp|Q9M0Y8|NSF_ARATH Vesicle-fusing ATPase OS=Arabidopsis thaliana OX=3702 GN=NSF PE=1 SV=2	KAG2312147.1 hypothetical protein Bca52824_023704 [Brassica carinata]
TRINITY_DN101729_c0_g1	320	-	-	-	-	-	-	-
TRINITY_DN10172_c0_g1	961	-	-	-	-	-	-	XP_024012357.1 uncharacterized protein LOC112086790 [Eutrema salsugineum]
TRINITY_DN10172_c0_g2	437	-	-	-	-	-	-	-
TRINITY_DN10172_c1_g1	1208	-	-	-	-	-	-	NP_680434.1 hypothetical protein AT5G54145 [Arabidopsis thaliana] &gt;AAK63971.1 unknown protein [Arabidopsis thaliana] &gt;AAL76130.1 At5g54141/$At5g54141 [Arabidopsis thaliana] &gt;AAM65415.1 unknown [Arabidopsis thaliana] &gt;AED96457.1 hypothetical protein AT5G54145 [Arabidopsis thaliana] &gt;OAO91579.1 hypothetical protein AXX17_AT5G53190 [Arabidopsis thaliana]
TRINITY_DN101734_c0_g1	717	-	-	-	-	-	-	-
TRINITY_DN101735_c0_g1	305	-	-	-	-	-	-	-
TRINITY_DN101736_c0_g1	465	-	K10688	PF00179	3GAXC	O	sp|Q55EY8|UBE2W_DICDI Probable ubiquitin-conjugating enzyme E2 W OS=Dictyostelium discoideum OX=44689 GN=ube2w PE=3 SV=1	XP_010932915.1 probable ubiquitin-conjugating enzyme E2 16 isoform X4 [Elaeis guineensis]
TRINITY_DN101738_c0_g1	329	-	-	-	-	-	-	-
TRINITY_DN101739_c0_g1	389	GO:0043231;GO:0044464;GO:0005623;GO:0005488;GO:0006913;GO:0031981;GO:0042886;GO:0006886;GO:0043233;GO:0005635;GO:0005048;GO:0043229;GO:0006607;GO:0042277;GO:0051170;GO:0005215;GO:0005737;GO:0051641;GO:0015833;GO:0140104;GO:0070727;GO:0006606;GO:0008104;GO:0033036;GO:0031975;GO:0034504;GO:0072594;GO:0046907;GO:0044424;GO:0015031;GO:0019899;GO:0005634;GO:0006810;GO:0031267;GO:0017038;GO:0061608;GO:…	K20221	PF03810	3I7BN	UY	sp|O60100|IMB4_SCHPO Probable importin subunit beta-4 OS=Schizosaccharomyces pombe (strain 972 / ATCC 24843) OX=284812 GN=kap123 PE=3 SV=1	ONL96236.1 ARM repeat superfamily protein [Zea mays]
TRINITY_DN10173_c0_g1	3983	GO:0016787;GO:0009416;GO:0004536;GO:0044424;GO:0009987;GO:0032392;GO:0043228;GO:0050896;GO:1901363;GO:0060255;GO:0010605;GO:0006807;GO:0051171;GO:0032553;GO:0044237;GO:0043229;GO:0016817;GO:0048478;GO:0006996;GO:0051716;GO:0065007;GO:0097367;GO:0035639;GO:2000112;GO:0006950;GO:0036310;GO:0070530;GO:0000166;GO:1901360;GO:0140097;GO:0031593;GO:0043227;GO:0031297;GO:0044249;GO:0005515;GO:0097617;GO:…	-	PF00176	3HPG8	B	sp|Q6NZP1|ZRAB3_MOUSE DNA annealing helicase and endonuclease ZRANB3 OS=Mus musculus OX=10090 GN=Zranb3 PE=1 SV=1	XP_020878017.1 DNA annealing helicase and endonuclease ZRANB3 isoform X1 [Arabidopsis lyrata subsp. lyrata]
TRINITY_DN101740_c0_g1	500	-	-	-	-	-	-	-
TRINITY_DN101744_c0_g1	384	-	-	-	-	-	-	-
TRINITY_DN101746_c0_g1	430	-	-	PF00481	34KIY	T	-	KAF6264430.1 phosphatase 2C-like domain-containing protein [Scenedesmus sp. NREL 46B-D3]
TRINITY_DN10174_c0_g1	610	GO:0071704;GO:0005198;GO:0043231;GO:0044464;GO:0005623;GO:0005488;GO:0003735;GO:0044237;GO:0043229;GO:0003723;GO:0034641;GO:0006518;GO:1901363;GO:0006807;GO:0005737;GO:0044424;GO:0009987;GO:0006412;GO:0008152;GO:0019843;GO:0010467;GO:0043228;GO:1901564;GO:0008150;GO:0043226;GO:0043232;GO:0044271;GO:0044444;GO:0043603;GO:0009059;GO:1901576;GO:0009507;GO:0003674;GO:0034645;GO:0003676;GO:0005622;GO:…	K19035	PF17257	3HV02	J	sp|Q9FKP0|PSRP6_ARATH 50S ribosomal protein 6, chloroplastic OS=Arabidopsis thaliana OX=3702 GN=PSRP6 PE=3 SV=1	OAO93397.1 PSRP6 [Arabidopsis thaliana]
TRINITY_DN101750_c0_g1	344	-	-	-	34JP6	C	sp|Q2RMD6|PFOR_MOOTA Pyruvate:ferredoxin oxidoreductase OS=Moorella thermoacetica (strain ATCC 39073 / JCM 9320) OX=264732 GN=Moth_0064 PE=1 SV=1	KAF6254486.1 pyruvate-ferredoxin oxidoreductase [Scenedesmus sp. NREL 46B-D3]
TRINITY_DN101752_c0_g1	366	-	-	-	-	-	-	-
TRINITY_DN101758_c0_g1	389	GO:0044464;GO:0005623;GO:0008187;GO:0043231;GO:0044451;GO:0051276;GO:0097447;GO:0090304;GO:0016573;GO:0036211;GO:0003727;GO:0018193;GO:0070717;GO:0070603;GO:0043233;GO:0033043;GO:0030425;GO:0016746;GO:0006475;GO:2000279;GO:0043984;GO:0006139;GO:0048519;GO:0010467;GO:0051052;GO:0008152;GO:0016407;GO:0010558;GO:0003674;GO:0016043;GO:0031327;GO:1904949;GO:0043996;GO:0044446;GO:0000228;GO:0032991;GO:…	-	-	3HY6Z	KT	-	XP_020865756.1 LOW QUALITY PROTEIN: uncharacterized protein LOC9325095 [Arabidopsis lyrata subsp. lyrata]
TRINITY_DN10175_c0_g1	452	GO:0006650;GO:0044238;GO:0005789;GO:0044248;GO:0012505;GO:0003824;GO:0005622;GO:0046394;GO:0044242;GO:0065008;GO:1901576;GO:0009507;GO:0042445;GO:0015718;GO:0019369;GO:0043226;GO:0098542;GO:0044444;GO:0051234;GO:1901564;GO:0008150;GO:0009695;GO:0016788;GO:0006820;GO:0051707;GO:0005794;GO:0043227;GO:0044249;GO:0071702;GO:0046434;GO:0052689;GO:0044431;GO:0009058;GO:0046486;GO:0009607;GO:0046475;GO:…	-	PF13855	3HR2A	I	sp|F4HX15|LPAI_ARATH Phospholipase A I OS=Arabidopsis thaliana OX=3702 GN=PLA1 PE=3 SV=1	XP_006391956.1 phospholipase A I isoform X2 [Eutrema salsugineum] &gt;ESQ29242.1 hypothetical protein EUTSA_v10023219mg [Eutrema salsugineum]
TRINITY_DN101761_c0_g1	530	GO:0006518;GO:0034641;GO:0015935;GO:1901363;GO:0005737;GO:0006807;GO:0044424;GO:0009987;GO:0006412;GO:0008152;GO:0043228;GO:0022626;GO:0010467;GO:0005198;GO:0071704;GO:0031981;GO:0022627;GO:0003735;GO:0071944;GO:0043231;GO:0005488;GO:0044464;GO:0005623;GO:0055044;GO:0044237;GO:0043229;GO:0044445;GO:0042788;GO:0016020;GO:0003723;GO:0005730;GO:0043233;GO:0009058;GO:0097159;GO:0043043;GO:0003729;GO:…	K02981	PF00333	3GC84	J	sp|P49688|RS23_ARATH 40S ribosomal protein S2-3 OS=Arabidopsis thaliana OX=3702 GN=RPS2C PE=1 SV=2	KAG6555798.1 hypothetical protein Mapa_002437 [Marchantia paleacea]
TRINITY_DN101762_c0_g1	765	-	K14498	PF00069	KOG0583	G	sp|Q9FFP9|SRK2H_ARATH Serine/threonine-protein kinase SRK2H OS=Arabidopsis thaliana OX=3702 GN=SRK2H PE=1 SV=1	KAF6257324.1 kinase-like domain-containing protein [Scenedesmus sp. NREL 46B-D3]
TRINITY_DN101766_c0_g1	301	-	-	-	-	-	-	-
TRINITY_DN101767_c0_g1	324	-	-	-	-	-	-	-
TRINITY_DN101769_c0_g1	978	-	-	PF02493	-	-	-	-
TRINITY_DN10176_c0_g1	432	GO:0012505;GO:0043227;GO:0043229;GO:0005794;GO:0005622;GO:0044424;GO:0044464;GO:0005623;GO:0005575;GO:0005737;GO:0043231;GO:0005739;GO:0044444;GO:0043226	-	-	3HR7I	S	sp|O64584|WAP_ARATH WPP domain-associated protein OS=Arabidopsis thaliana OX=3702 GN=WAP PE=1 SV=2	XP_019100437.1 PREDICTED: WPP domain-associated protein-like isoform X1 [Camelina sativa] &gt;XP_019100439.1 PREDICTED: WPP domain-associated protein-like isoform X3 [Camelina sativa]
TRINITY_DN101771_c0_g1	370	-	-	PF10282	-	-	-	-
TRINITY_DN101775_c0_g1	352	-	-	-	-	-	-	-
TRINITY_DN101779_c0_g1	391	GO:1903293;GO:2000113;GO:0000784;GO:0044428;GO:0050794;GO:0006281;GO:0005634;GO:0046483;GO:0042981;GO:0051094;GO:0018130;GO:0000122;GO:0044271;GO:0034056;GO:1901362;GO:0050789;GO:0043170;GO:0070013;GO:1901215;GO:0031326;GO:0048523;GO:0000987;GO:0005575;GO:0042802;GO:0010033;GO:0019438;GO:0071456;GO:0010941;GO:0044427;GO:0048518;GO:1902680;GO:1903706;GO:0048541;GO:0046649;GO:0001085;GO:0035556;GO:…	-	PF00505	KOG0381	B	-	-
TRINITY_DN10177_c0_g1	2153	GO:0043168;GO:0005524;GO:0044237;GO:0016740;GO:0016779;GO:0006351;GO:0003723;GO:0016020;GO:0004652;GO:0071704;GO:0097367;GO:0035639;GO:0090304;GO:0006397;GO:0044464;GO:0005488;GO:0005623;GO:0016071;GO:0071944;GO:0000166;GO:1901360;GO:0016070;GO:0008152;GO:0009987;GO:0044424;GO:0008144;GO:0097659;GO:0010467;GO:0006396;GO:0016772;GO:0006139;GO:0009451;GO:1901363;GO:0006276;GO:0034641;GO:0005737;GO:…	-	PF01743	3HX51	J	sp|P44439|PCNB_HAEIN Poly(A) polymerase I OS=Haemophilus influenzae (strain ATCC 51907 / DSM 11121 / KW20 / Rd) OX=71421 GN=pcnB PE=3 SV=1	CAE6117115.1 unnamed protein product [Arabidopsis arenosa]
TRINITY_DN101781_c0_g1	345	-	-	-	-	-	-	-
TRINITY_DN101783_c0_g1	330	-	-	-	-	-	-	-
TRINITY_DN101784_c0_g1	400	-	-	-	-	-	-	-
TRINITY_DN101785_c0_g1	383	-	-	-	-	-	-	BAB33421.1 putative senescence-associated protein, partial [Pisum sativum]
TRINITY_DN101786_c0_g1	510	-	-	-	-	-	-	-
TRINITY_DN10178_c0_g1	2956	GO:0019538;GO:0043170;GO:0043412;GO:1901265;GO:0044260;GO:0005575;GO:0017076;GO:0036094;GO:0097159;GO:0044425;GO:0016773;GO:0016310;GO:0004674;GO:0044267;GO:0043167;GO:0044238;GO:0031224;GO:0003824;GO:0006464;GO:0032559;GO:0003674;GO:0032555;GO:0008150;GO:1901564;GO:0030554;GO:0016772;GO:0140096;GO:0008152;GO:0009987;GO:0008144;GO:0004672;GO:0006468;GO:0032553;GO:0006807;GO:1901363;GO:0016021;GO:…	-	PF13855;PF07714;PF12819	3HXY5	T	sp|C0LGR6|Y4291_ARATH Probable LRR receptor-like serine/threonine-protein kinase At4g29180 OS=Arabidopsis thaliana OX=3702 GN=At4g29180 PE=1 SV=2	XP_023634033.1 probable LRR receptor-like serine/threonine-protein kinase At4g29180 isoform X2 [Capsella rubella]
TRINITY_DN10178_c0_g2	2230	-	-	PF13855;PF12819;PF07714	3HZIY	T	sp|C0LGG3|Y5182_ARATH Probable LRR receptor-like serine/threonine-protein kinase At1g51820 OS=Arabidopsis thaliana OX=3702 GN=At1g51820 PE=1 SV=1	VVB00537.1 unnamed protein product [Arabis nemorensis]
TRINITY_DN10178_c0_g3	2192	-	-	PF12799;PF07714;PF12819	3HZIY	T	sp|C0LGG3|Y5182_ARATH Probable LRR receptor-like serine/threonine-protein kinase At1g51820 OS=Arabidopsis thaliana OX=3702 GN=At1g51820 PE=1 SV=1	VVB00537.1 unnamed protein product [Arabis nemorensis]
TRINITY_DN10178_c1_g1	1669	GO:0097306;GO:0044260;GO:0017076;GO:0016773;GO:0016310;GO:0071310;GO:0043412;GO:0009738;GO:0043227;GO:0071396;GO:0032555;GO:0044444;GO:0043226;GO:1901564;GO:0008150;GO:0030554;GO:0032501;GO:0044238;GO:0003824;GO:0006464;GO:0005622;GO:0048856;GO:0009755;GO:0032553;GO:0023052;GO:0006807;GO:0032870;GO:1901363;GO:0006793;GO:0009737;GO:0050896;GO:0140096;GO:0044424;GO:0009987;GO:0004672;GO:0007275;GO:…	K14498	PF00069	3HWMF	T	sp|Q9SMQ4|SRK2F_ARATH Serine/threonine-protein kinase SRK2F OS=Arabidopsis thaliana OX=3702 GN=SRK2F PE=1 SV=1	XP_006283987.2 serine/threonine-protein kinase SRK2F [Capsella rubella]
TRINITY_DN101791_c0_g1	387	-	-	-	-	-	-	-
TRINITY_DN101793_c0_g1	396	-	-	-	-	-	-	-
TRINITY_DN101795_c0_g1	550	-	-	-	-	-	-	-
TRINITY_DN10179_c0_g1	2355	GO:0019222;GO:0051346;GO:0045934;GO:0051336;GO:0031324;GO:0005773;GO:0043227;GO:0005515;GO:1905778;GO:0071840;GO:0065009;GO:0009892;GO:0008150;GO:0043226;GO:0006725;GO:0044434;GO:0051252;GO:0044444;GO:0009507;GO:0080090;GO:0003676;GO:0031967;GO:0005622;GO:0044238;GO:0043086;GO:0005774;GO:0031323;GO:0060701;GO:1901363;GO:0006807;GO:0010605;GO:0009941;GO:0060255;GO:0051171;GO:0009570;GO:0009416;GO:…	-	PF13432	3HRR8	S	sp|Q8RWG2|CF107_ARATH Protein high chlorophyll fluorescent 107 OS=Arabidopsis thaliana OX=3702 GN=HCF107 PE=1 SV=1	XP_020889124.1 protein high chlorophyll fluorescent 107 [Arabidopsis lyrata subsp. lyrata] &gt;EFH61444.1 HCF107 [Arabidopsis lyrata subsp. lyrata]
TRINITY_DN101801_c0_g1	352	-	-	-	-	-	-	-
TRINITY_DN101802_c0_g1	389	GO:1901363;GO:0006807;GO:0044424;GO:0009987;GO:0006396;GO:0043228;GO:0031090;GO:0042254;GO:0003735;GO:1901360;GO:0044445;GO:0043229;GO:0044237;GO:0055044;GO:0006364;GO:0005730;GO:0003723;GO:0043043;GO:0009058;GO:0005840;GO:0031974;GO:1990904;GO:0005773;GO:0044260;GO:0044249;GO:0005844;GO:0043227;GO:0022625;GO:0071840;GO:0009506;GO:0005911;GO:0008150;GO:1901564;GO:0044444;GO:0043232;GO:0016072;GO:…	K02936	-	3HW8Y	J	sp|P0DJ14|RL7A_TETTH 60S ribosomal protein L7a OS=Tetrahymena thermophila OX=5911 GN=RPL7A PE=1 SV=1	ACG24489.1 60S ribosomal protein L7a [Zea mays]
TRINITY_DN101808_c0_g1	348	GO:0009266;GO:0003674;GO:0005739;GO:0043436;GO:0005829;GO:0046483;GO:0009628;GO:0034284;GO:0004616;GO:0044422;GO:0044446;GO:1901700;GO:0006082;GO:0010033;GO:0009536;GO:0009117;GO:0005575;GO:0019752;GO:0009415;GO:0046496;GO:0033993;GO:0071704;GO:0006732;GO:0043231;GO:0034285;GO:0006796;GO:0005623;GO:0044464;GO:0010035;GO:0009744;GO:0005975;GO:0009651;GO:0009719;GO:0016020;GO:0016616;GO:0019637;GO:…	K00033	PF03446;PF00393	3G9N7	G	sp|Q9SH69|6PGD1_ARATH 6-phosphogluconate dehydrogenase, decarboxylating 1, chloroplastic OS=Arabidopsis thaliana OX=3702 GN=PGD1 PE=1 SV=1	GAX72586.1 hypothetical protein CEUSTIGMA_g42.t1 [Chlamydomonas eustigma]
TRINITY_DN10180_c0_g1	1619	GO:0003824;GO:0008202;GO:0044238;GO:0031224;GO:0043167;GO:0006694;GO:0065008;GO:1901137;GO:0048856;GO:0046872;GO:0016709;GO:0046914;GO:0016705;GO:1901576;GO:1901617;GO:0042445;GO:0016135;GO:0003674;GO:0032501;GO:0008150;GO:1901362;GO:0006722;GO:0016138;GO:0016132;GO:0005575;GO:0004497;GO:0005506;GO:0044425;GO:1901657;GO:0009058;GO:0055088;GO:0097159;GO:0042592;GO:0016134;GO:0016020;GO:0065007;GO:…	-	PF00067	3HNAQ	Q	sp|Q9LVY7|C7161_ARATH Cytochrome P450 716A1 OS=Arabidopsis thaliana OX=3702 GN=CYP716A1 PE=3 SV=1	CAD5333214.1 unnamed protein product [Arabidopsis thaliana]
TRINITY_DN101810_c0_g1	338	-	-	-	-	-	-	-
TRINITY_DN101811_c0_g1	327	-	-	-	-	-	-	-
TRINITY_DN101816_c0_g1	417	GO:0009738;GO:0071310;GO:0043412;GO:0005886;GO:0016773;GO:0044425;GO:0016310;GO:0044260;GO:0097306;GO:0017076;GO:0006464;GO:0048856;GO:0044238;GO:0003824;GO:1901564;GO:0008150;GO:0032501;GO:0030554;GO:0071396;GO:0032555;GO:0009987;GO:0004672;GO:0007275;GO:0050896;GO:0009737;GO:0140096;GO:1901363;GO:0032870;GO:0006793;GO:0032553;GO:0009755;GO:0023052;GO:0006807;GO:0016740;GO:0044237;GO:0051716;GO:…	-	-	3I1R8	T	sp|Q66GN2|LRK64_ARATH Lectin-domain containing receptor kinase VI.4 OS=Arabidopsis thaliana OX=3702 GN=LECRK64 PE=2 SV=1	XP_019089912.1 PREDICTED: lectin-domain containing receptor kinase VI.4-like [Camelina sativa] &gt;XP_019089913.1 PREDICTED: lectin-domain containing receptor kinase VI.4-like [Camelina sativa] &gt;XP_019089914.1 PREDICTED: lectin-domain containing receptor kinase VI.4-like [Camelina sativa] &gt;XP_019089915.1 PREDICTED: lectin-domain containing receptor kinase VI.4-like [Camelina sativa] &gt;XP_…
TRINITY_DN101819_c0_g1	339	-	-	-	-	-	-	-
TRINITY_DN101820_c0_g1	492	-	-	-	-	-	-	-
TRINITY_DN101821_c0_g1	308	-	-	-	-	-	-	-
TRINITY_DN101825_c0_g1	377	-	-	-	-	-	-	KAF6261873.1 hypothetical protein COO60DRAFT_1699583 [Scenedesmus sp. NREL 46B-D3]
TRINITY_DN101828_c0_g1	550	-	-	-	3I83N	G	-	-
TRINITY_DN10182_c0_g1	2173	GO:0016020;GO:0031224;GO:0071944;GO:0005575;GO:0005623;GO:0044464;GO:0005886;GO:0016021;GO:0044425	K16302	-	3HSBM	S	sp|Q8RY60|Y1733_ARATH DUF21 domain-containing protein At1g47330 OS=Arabidopsis thaliana OX=3702 GN=CBSDUF7 PE=1 SV=1	OAP18246.1 hypothetical protein AXX17_AT1G41290 [Arabidopsis thaliana]
TRINITY_DN101830_c0_g1	312	-	-	-	-	-	-	-
TRINITY_DN101832_c0_g1	384	-	-	PF00365	KOG2440	G	sp|Q27705|PFP_NAEFO Pyrophosphate--fructose 6-phosphate 1-phosphotransferase OS=Naegleria fowleri OX=5763 PE=1 SV=1	-
TRINITY_DN101836_c0_g1	372	-	-	-	-	-	-	-
TRINITY_DN101839_c0_g1	313	-	-	-	-	-	-	-
TRINITY_DN10183_c0_g1	2211	-	-	PF05705	3HQ91	S	sp|P98205|ALA2_ARATH Phospholipid-transporting ATPase 2 OS=Arabidopsis thaliana OX=3702 GN=ALA2 PE=1 SV=1	CAE6221197.1 unnamed protein product [Arabidopsis arenosa]
TRINITY_DN101840_c0_g1	312	-	-	-	-	-	-	-
TRINITY_DN101841_c0_g1	327	-	-	-	3HTSV	A	-	-
TRINITY_DN101842_c0_g1	360	-	-	-	-	-	-	-
TRINITY_DN101845_c0_g1	354	-	-	-	-	-	-	-
TRINITY_DN101846_c0_g1	382	-	-	PF10604	-	-	-	GAX78012.1 hypothetical protein CEUSTIGMA_g5454.t1 [Chlamydomonas eustigma]
TRINITY_DN101847_c0_g1	626	-	-	PF14223	3GIZQ	L	-	XP_019098355.1 PREDICTED: uncharacterized protein LOC109131639 [Camelina sativa]
TRINITY_DN101848_c0_g1	2142	-	-	-	3HZKC	H	sp|B0WSW8|MOCO1_CULQU Molybdenum cofactor sulfurase 1 OS=Culex quinquefasciatus OX=7176 GN=mal1 PE=3 SV=1	CAE6181695.1 unnamed protein product [Arabidopsis arenosa]
TRINITY_DN10184_c0_g1	659	-	-	-	-	-	-	-
TRINITY_DN10184_c0_g2	918	GO:0097305;GO:0046677;GO:0005199;GO:0048522;GO:0005737;GO:0045927;GO:0009725;GO:0040008;GO:0009505;GO:0046620;GO:0042221;GO:0044424;GO:0009737;GO:0050896;GO:0033993;GO:0005198;GO:0010035;GO:0005623;GO:0044464;GO:0001101;GO:0006950;GO:0043231;GO:0051239;GO:0071944;GO:0048518;GO:0043229;GO:0014070;GO:0009413;GO:0065007;GO:0009719;GO:0050793;GO:1901700;GO:0005575;GO:0005618;GO:0005773;GO:0010033;GO:…	-	-	3GIFH	S	sp|Q9LTP5|GRP5_ARATH Glycine-rich protein 5 OS=Arabidopsis thaliana OX=3702 GN=GRP5 PE=2 SV=1	XP_010466237.1 PREDICTED: glycine-rich protein 5-like [Camelina sativa]
TRINITY_DN10184_c1_g1	687	-	-	-	-	-	sp|P27483|GRP1_ARATH Glycine-rich cell wall structural protein OS=Arabidopsis thaliana OX=3702 GN=At3g17050 PE=3 SV=2	KAF8099595.1 hypothetical protein N665_0241s0028 [Sinapis alba]
TRINITY_DN10185_c0_g1	1819	GO:0034654;GO:0006596;GO:0019222;GO:0016830;GO:0009058;GO:0009309;GO:0009163;GO:0009892;GO:0004014;GO:0044249;GO:0048731;GO:0044419;GO:1901576;GO:1901564;GO:0008150;GO:0006576;GO:0032501;GO:0044444;GO:0006725;GO:0017144;GO:0003824;GO:0016831;GO:0042278;GO:0044238;GO:0006597;GO:0009308;GO:0010629;GO:0005622;GO:0048856;GO:0006807;GO:0010605;GO:0060255;GO:1901135;GO:0034404;GO:0046129;GO:0008215;GO:…	K01611	PF01536	3HXFG	T	sp|Q9S7T9|DCAM2_ARATH S-adenosylmethionine decarboxylase proenzyme 2 OS=Arabidopsis thaliana OX=3702 GN=SAMDC2 PE=2 SV=1	VVB14674.1 unnamed protein product [Arabis nemorensis]
TRINITY_DN10185_c0_g2	575	-	-	-	3I1JI	S	-	CAA7018151.1 unnamed protein product [Microthlaspi erraticum]
TRINITY_DN101863_c0_g1	530	-	-	-	-	-	-	-
TRINITY_DN101864_c0_g1	310	-	-	-	-	-	-	-
TRINITY_DN101867_c0_g1	383	-	-	-	-	-	-	-
TRINITY_DN101869_c0_g1	413	-	-	-	-	-	-	-
TRINITY_DN10186_c0_g1	709	-	-	PF04525	3HTK3	S	sp|Q9ZUF7|LOR6_ARATH Protein LURP-one-related 6 OS=Arabidopsis thaliana OX=3702 GN=At2g05910 PE=2 SV=1	CAA7039028.1 unnamed protein product [Microthlaspi erraticum]
TRINITY_DN10186_c1_g1	425	-	-	-	-	-	-	-
TRINITY_DN101870_c0_g1	335	-	-	-	-	-	-	-
TRINITY_DN101884_c0_g1	421	GO:0009058;GO:0019842;GO:1901363;GO:0097159;GO:0070279;GO:0036094;GO:0005737;GO:0005575;GO:0044424;GO:0008144;GO:0008152;GO:0010326;GO:0008483;GO:0048037;GO:0008150;GO:0050662;GO:0003674;GO:0016769;GO:0005623;GO:0005488;GO:0044464;GO:0005622;GO:0016740;GO:0043168;GO:0043167;GO:0030170;GO:0003824	-	-	4JKDV	E	sp|Q71RI9|KAT3_MOUSE Kynurenine--oxoglutarate transaminase 3 OS=Mus musculus OX=10090 GN=Kyat3 PE=1 SV=1	XP_020238892.1 uncharacterized protein LOC109817949 isoform X1 [Cajanus cajan] &gt;XP_029124573.1 uncharacterized protein LOC109817949 isoform X2 [Cajanus cajan]
TRINITY_DN101886_c0_g1	368	-	-	PF06565	34JSI	S	-	-
TRINITY_DN101888_c0_g1	408	GO:0016556;GO:0044238;GO:0003723;GO:0003824;GO:0005622;GO:0090305;GO:0044237;GO:0043229;GO:0003676;GO:1901360;GO:0003674;GO:0004518;GO:0016071;GO:0043231;GO:0005739;GO:0005623;GO:0046483;GO:0044464;GO:0005488;GO:0006725;GO:0090304;GO:0043226;GO:0044444;GO:0071704;GO:0008150;GO:0043170;GO:0006139;GO:0080156;GO:0016788;GO:0043412;GO:0009987;GO:0044424;GO:1900864;GO:0008152;GO:0043227;GO:0016070;GO:…	-	PF01535;PF20431	3HWXM	S	sp|Q9MA95|PP214_ARATH Putative pentatricopeptide repeat-containing protein At3g05240 OS=Arabidopsis thaliana OX=3702 GN=PCMP-E82 PE=3 SV=2	EFH60755.1 pentatricopeptide repeat-containing protein [Arabidopsis lyrata subsp. lyrata]
TRINITY_DN101889_c0_g1	341	-	-	-	-	-	-	-
TRINITY_DN10188_c0_g1	1021	-	-	-	-	-	-	XP_020870433.1 uncharacterized protein LOC110225326 [Arabidopsis lyrata subsp. lyrata]
TRINITY_DN101891_c0_g1	337	-	-	-	34IFQ	S	sp|Q9ASS2|FREE1_ARATH Protein FREE1 OS=Arabidopsis thaliana OX=3702 GN=FREE1 PE=1 SV=1	KAF6262398.1 hypothetical protein COO60DRAFT_1624958 [Scenedesmus sp. NREL 46B-D3]
TRINITY_DN101893_c0_g1	434	GO:0043227;GO:0044249;GO:0005794;GO:0009846;GO:0008373;GO:0043412;GO:0071840;GO:0040007;GO:0032580;GO:0044425;GO:0009058;GO:0044431;GO:0006664;GO:0044260;GO:0030259;GO:1990743;GO:0005622;GO:0048856;GO:0006464;GO:0003824;GO:0018279;GO:0044238;GO:0012505;GO:0032501;GO:0030258;GO:1901564;GO:0008150;GO:0043226;GO:0044444;GO:0000904;GO:0009059;GO:0016757;GO:1901576;GO:0031982;GO:0009860;GO:0009101;GO:…	-	-	3HRHQ	G	-	-
TRINITY_DN101894_c0_g1	493	-	-	-	-	-	-	-
TRINITY_DN101895_c0_g1	397	-	-	-	-	-	-	-
TRINITY_DN101896_c0_g1	1059	GO:1990904;GO:0005737;GO:0042254;GO:0044464;GO:0005575;GO:0005623;GO:0005840;GO:0022613;GO:0043226;GO:0044085;GO:0043232;GO:0044444;GO:0008150;GO:0043228;GO:0032991;GO:0071840;GO:0005622;GO:0044424;GO:0043229	K02941	PF00466;PF17777;PF00428	3GA5W	J	sp|P26796|RLA0_TRYCR 60S acidic ribosomal protein P0 OS=Trypanosoma cruzi OX=5693 PE=2 SV=2	XP_010685586.1 PREDICTED: 60S acidic ribosomal protein P0 [Beta vulgaris subsp. vulgaris] &gt;KMT05090.1 hypothetical protein BVRB_7g172440 [Beta vulgaris subsp. vulgaris]
TRINITY_DN101898_c0_g1	320	-	K01307	PF07722	34I1V	H	sp|Q54HL4|GGHB_DICDI Gamma-glutamyl hydrolase B OS=Dictyostelium discoideum OX=44689 GN=gghB PE=3 SV=1	GIL88439.1 hypothetical protein Vretifemale_16403 [Volvox reticuliferus]
TRINITY_DN10189_c0_g1	353	-	-	-	-	-	-	-
TRINITY_DN1018_c0_g1	1162	GO:0009059;GO:0032774;GO:0080090;GO:1901576;GO:0008150;GO:0032501;GO:0051252;GO:0009640;GO:0043226;GO:0006725;GO:0031323;GO:0044238;GO:0003676;GO:0048856;GO:0005622;GO:0034654;GO:0044260;GO:0006355;GO:0019222;GO:0003677;GO:0009058;GO:0009908;GO:0042826;GO:0044249;GO:0043227;GO:1903506;GO:0048731;GO:0005515;GO:1901360;GO:2000112;GO:0006351;GO:0003680;GO:0065007;GO:0000003;GO:0044237;GO:0043229;GO:…	-	PF03479	3HS28	K	sp|O22130|AHL22_ARATH AT-hook motif nuclear-localized protein 22 OS=Arabidopsis thaliana OX=3702 GN=AHL22 PE=1 SV=1	XP_006397724.1 AT-hook motif nuclear-localized protein 22 [Eutrema salsugineum] &gt;ESQ39177.1 hypothetical protein EUTSA_v10001760mg [Eutrema salsugineum]
TRINITY_DN1018_c1_g1	3214	GO:0000976;GO:0006996;GO:0043229;GO:0044237;GO:0051716;GO:0065007;GO:0070988;GO:0006351;GO:0016577;GO:0032454;GO:2000112;GO:1901360;GO:0009987;GO:0044424;GO:0001067;GO:0050896;GO:0098869;GO:0031490;GO:0043228;GO:0140096;GO:0097659;GO:0055114;GO:1901363;GO:0032451;GO:0005654;GO:0051171;GO:0060255;GO:0006807;GO:0046872;GO:0006464;GO:0005622;GO:0003676;GO:0016209;GO:0031323;GO:0044238;GO:0042493;GO:…	K15601	PF02373	3HP6E	K	sp|Q9SSE9|JMJ25_ARATH Lysine-specific demethylase JMJ25 OS=Arabidopsis thaliana OX=3702 GN=JMJ25 PE=1 SV=1	XP_024008337.1 lysine-specific demethylase JMJ25 isoform X2 [Eutrema salsugineum]
TRINITY_DN101904_c0_g1	423	-	-	PF00235	-	-	sp|P23412|PROF_TETPY Profilin OS=Tetrahymena pyriformis OX=5908 PE=2 SV=1	-
TRINITY_DN101905_c0_g1	347	GO:0097159;GO:0008324;GO:0030551;GO:0044425;GO:0006813;GO:0015077;GO:0044459;GO:0005267;GO:0036094;GO:0017076;GO:0005575;GO:0005261;GO:0005515;GO:1901265;GO:0071804;GO:0022836;GO:0030553;GO:0006811;GO:0015318;GO:0005886;GO:0051234;GO:0031226;GO:0030554;GO:0008150;GO:0051179;GO:0022803;GO:0003674;GO:0005249;GO:0005887;GO:0032555;GO:0006810;GO:0032559;GO:0098660;GO:0055085;GO:0065008;GO:0022843;GO:…	K05391	-	3GHF0	P	sp|Q9LNJ0|CNG10_ARATH Probable cyclic nucleotide-gated ion channel 10 OS=Arabidopsis thaliana OX=3702 GN=CNGC10 PE=2 SV=2	-
TRINITY_DN10190_c0_g1	364	GO:0003674;GO:0010033;GO:0005488;GO:0046914;GO:0010200;GO:0097159;GO:0003677;GO:1901700;GO:1901363;GO:0008270;GO:0008150;GO:0043167;GO:0043169;GO:0050896;GO:0042493;GO:0046872;GO:0042221;GO:1901698;GO:0003676;GO:0010243	-	-	3HU7M	S	sp|Q9SJM6|SAP4_ARATH Zinc finger A20 and AN1 domain-containing stress-associated protein 4 OS=Arabidopsis thaliana OX=3702 GN=SAP4 PE=1 SV=1	XP_039034891.1 zinc finger A20 and AN1 domain-containing stress-associated protein 6-like [Hibiscus syriacus] &gt;KAE8673039.1 Zinc finger A20 and AN1 domain-containing stress-associated protein 6 [Hibiscus syriacus]
TRINITY_DN10190_c1_g1	1909	-	K12614	-	4JKFH	A	sp|Q8RXK6|RH8_ARATH DEAD-box ATP-dependent RNA helicase 8 OS=Arabidopsis thaliana OX=3702 GN=RH8 PE=2 SV=1	KJB41290.1 hypothetical protein B456_007G097600 [Gossypium raimondii]
TRINITY_DN101911_c0_g1	311	-	-	-	3HWGQ	I	-	OAP04200.1 hypothetical protein AXX17_AT3G24870 [Arabidopsis thaliana]
TRINITY_DN101912_c0_g1	442	-	-	-	-	-	-	-
TRINITY_DN101914_c0_g1	303	GO:0016301;GO:0044464;GO:0005488;GO:0006796;GO:0005623;GO:0043231;GO:0000166;GO:0036211;GO:0071704;GO:0033993;GO:0035639;GO:0097367;GO:0014070;GO:0009719;GO:0043168;GO:0005524;GO:0043229;GO:0044237;GO:0016740;GO:0005737;GO:0006807;GO:0032553;GO:1901363;GO:0006793;GO:0140096;GO:0016772;GO:0050896;GO:0006468;GO:0004672;GO:0009725;GO:0008152;GO:0009741;GO:0042221;GO:0044424;GO:0008144;GO:0009987;GO:…	-	-	44PBX	T	sp|P43289|KSG3_ARATH Shaggy-related protein kinase gamma OS=Arabidopsis thaliana OX=3702 GN=ASK3 PE=1 SV=1	XP_004240041.1 shaggy-related protein kinase epsilon [Solanum lycopersicum]
TRINITY_DN101917_c0_g1	329	-	-	-	-	-	-	-
TRINITY_DN10191_c0_g1	1841	-	-	-	3HSEF	S	sp|Q9SRE5|Y1666_ARATH Uncharacterized protein At1g76660 OS=Arabidopsis thaliana OX=3702 GN=At1g76660 PE=2 SV=1	CAE6236402.1 unnamed protein product [Arabidopsis arenosa]
TRINITY_DN101922_c0_g1	354	-	K07208	-	4JGRA	U	sp|Q18246|RAP1_CAEEL Ras-related protein Rap-1 OS=Caenorhabditis elegans OX=6239 GN=rap-1 PE=3 SV=1	XP_023907877.1 ras-like protein [Quercus suber]
TRINITY_DN101924_c0_g1	460	GO:0019538;GO:0043170;GO:0050789;GO:0098772;GO:0021543;GO:0043604;GO:0010033;GO:0005575;GO:0042063;GO:1901700;GO:0097159;GO:0008135;GO:0044267;GO:1901566;GO:0034284;GO:0032991;GO:0002764;GO:0050852;GO:0050794;GO:0034645;GO:0051020;GO:0003674;GO:0002253;GO:0009628;GO:0021761;GO:0043603;GO:0044271;GO:0007154;GO:0009266;GO:0016772;GO:0005851;GO:0060322;GO:0010467;GO:0008152;GO:0006412;GO:0030154;GO:…	K03241	PF00483	3GE6S	J	sp|Q752H4|MPG1_ASHGO Mannose-1-phosphate guanyltransferase OS=Ashbya gossypii (strain ATCC 10895 / CBS 109.51 / FGSC 9923 / NRRL Y-1056) OX=284811 GN=MPG1 PE=3 SV=1	GIL56412.1 hypothetical protein Vafri_11777 [Volvox africanus]
TRINITY_DN101925_c0_g1	370	GO:0097159;GO:0005575;GO:0036094;GO:0017076;GO:1901265;GO:0007264;GO:0050789;GO:0005886;GO:0001883;GO:0008150;GO:0005525;GO:0007154;GO:0032555;GO:0003674;GO:0050794;GO:0016462;GO:0005622;GO:0003824;GO:0016818;GO:0043167;GO:1901363;GO:0001882;GO:0017111;GO:0023052;GO:0005737;GO:0032553;GO:0007165;GO:0019001;GO:0016787;GO:0003924;GO:0009987;GO:0044424;GO:0032549;GO:0050896;GO:0097367;GO:0035639;GO:…	K04392	PF00071	3INFF	S	sp|P34148|RACB_DICDI Rho-related protein racB OS=Dictyostelium discoideum OX=44689 GN=racB PE=1 SV=1	CAI84893.1 putative Rac GTPase [Medicago sativa subsp. x varia]
TRINITY_DN101927_c0_g1	338	-	-	-	-	-	-	-
TRINITY_DN101928_c0_g1	350	-	-	-	-	-	-	-
TRINITY_DN10192_c0_g1	769	-	K11253	PF00125	4JEG6	B	sp|P0DPK2|H3Y1_HUMAN Histone H3.Y OS=Homo sapiens OX=9606 GN=H3Y1 PE=1 SV=1	KHG01630.1 Histone H3.3 [Gossypium arboreum]
TRINITY_DN10192_c0_g2	744	-	K11253	PF00125	34KXD	B	sp|Q27489|H33L3_CAEEL Putative histone H3.3-like type 3 OS=Caenorhabditis elegans OX=6239 GN=his-69 PE=5 SV=1	GAX77127.1 hypothetical protein CEUSTIGMA_g4573.t1 [Chlamydomonas eustigma]
TRINITY_DN101935_c0_g1	388	GO:0040007;GO:0005886;GO:0048731;GO:0005515;GO:0051049;GO:0022836;GO:0034762;GO:0080147;GO:0008324;GO:0005267;GO:0044425;GO:0015077;GO:0044459;GO:0005216;GO:0098660;GO:0048856;GO:0065008;GO:0022803;GO:0005887;GO:0090558;GO:0010015;GO:0051234;GO:0008150;GO:0032501;GO:0031226;GO:0050896;GO:0016049;GO:0006812;GO:0010119;GO:0098655;GO:0009987;GO:0010054;GO:0048767;GO:0007275;GO:0048364;GO:0090333;GO:…	-	PF07885	3GACC	PT	sp|P0C550|AKT1_ORYSI Potassium channel AKT1 OS=Oryza sativa subsp. indica OX=39946 GN=AKT1 PE=2 SV=1	XP_013890712.1 Potassium channel AKT2/3 [Monoraphidium neglectum] &gt;KIY91692.1 Potassium channel AKT2/3 [Monoraphidium neglectum]
TRINITY_DN10193_c0_g1	414	-	-	-	-	-	-	-
TRINITY_DN101940_c0_g1	609	GO:0009056;GO:0051716;GO:0019748;GO:0016765;GO:0016740;GO:0042579;GO:0044237;GO:0043229;GO:0006790;GO:0043231;GO:0006575;GO:0044464;GO:0005623;GO:1990748;GO:0071704;GO:0050896;GO:0098869;GO:0070887;GO:0055114;GO:0042221;GO:0009987;GO:0044424;GO:0008152;GO:0004364;GO:0004601;GO:0006807;GO:0005737;GO:0006749;GO:0034641;GO:0006518;GO:0098754;GO:0016491;GO:0051186;GO:0044248;GO:0003824;GO:0005622;GO:…	K00799	PF14497;PF02798	3HQGM	O	sp|Q8L727|GSTT2_ARATH Glutathione S-transferase T2 OS=Arabidopsis thaliana OX=3702 GN=GSTT2 PE=2 SV=1	NP_198940.3 glutathione S-transferase THETA 2 [Arabidopsis thaliana] &gt;Q8L727.1 RecName: Full=Glutathione S-transferase T2; Short=AtGSTT2; AltName: Full=GST class-theta member 2; AltName: Full=Glutathione S-transferase 10B [Arabidopsis thaliana] &gt;AAM98138.1 glutathione transferase [Arabidopsis thaliana] &gt;AAP37720.1 At5g41240 [Arabidopsis thaliana] &gt;AED94656.1 glutathione S-transferase …
TRINITY_DN101942_c0_g1	505	-	-	PF04774	-	-	-	-
TRINITY_DN101943_c0_g1	358	GO:0005622;GO:0048856;GO:0003676;GO:0009793;GO:0090305;GO:0010154;GO:0044238;GO:0003824;GO:0006725;GO:0043226;GO:0008150;GO:0009791;GO:0032501;GO:0003674;GO:0046483;GO:0022622;GO:0048731;GO:0043227;GO:0043170;GO:0016788;GO:0043412;GO:0009790;GO:0099402;GO:0097159;GO:0005575;GO:0048608;GO:0000003;GO:0043229;GO:0044237;GO:0003723;GO:0048367;GO:0090304;GO:0061458;GO:0071704;GO:0004518;GO:1901360;GO:…	-	-	3HNA9	S	sp|Q9MAG8|PPR79_ARATH Putative pentatricopeptide repeat-containing protein At1g53330 OS=Arabidopsis thaliana OX=3702 GN=At1g53330 PE=3 SV=1	-
TRINITY_DN101944_c0_g1	466	-	-	-	-	-	-	-
TRINITY_DN101945_c0_g1	715	GO:0043632;GO:0005623;GO:0044464;GO:0005488;GO:0016567;GO:1901575;GO:0071704;GO:0036211;GO:0009056;GO:0061659;GO:0070647;GO:0016740;GO:1901565;GO:0000209;GO:0044237;GO:0051603;GO:0005737;GO:0006807;GO:0009057;GO:0030163;GO:0061630;GO:0044265;GO:0043169;GO:0140096;GO:0009987;GO:0044424;GO:0008152;GO:0010498;GO:0003674;GO:0019787;GO:0019941;GO:0008150;GO:1901564;GO:0044238;GO:0044267;GO:0044248;GO:…	K11982	PF13639	3HNQM	O	sp|Q9SPL2|CIP8_ARATH E3 ubiquitin-protein ligase CIP8 OS=Arabidopsis thaliana OX=3702 GN=CIP8 PE=1 SV=1	XP_022549852.1 E3 ubiquitin-protein ligase CIP8-like [Brassica napus] &gt;CAF2078824.1 unnamed protein product [Brassica napus] &gt;CDY32333.1 BnaC01g36520D [Brassica napus]
TRINITY_DN10194_c0_g1	494	-	-	-	-	-	-	-
TRINITY_DN101950_c0_g1	434	-	K03106	-	3HXK4	U	sp|P49967|SR543_ARATH Signal recognition particle 54 kDa protein 3 OS=Arabidopsis thaliana OX=3702 GN=SRP-54C PE=2 SV=2	XP_010461733.1 PREDICTED: signal recognition particle 54 kDa protein 3 [Camelina sativa] &gt;XP_019099437.1 PREDICTED: signal recognition particle 54 kDa protein 3 [Camelina sativa]
TRINITY_DN101955_c0_g1	322	-	-	-	-	-	-	XP_024370465.1 uncharacterized protein LOC112279924 isoform X2 [Physcomitrium patens]
TRINITY_DN101956_c0_g1	374	-	-	-	-	-	-	-
TRINITY_DN101958_c0_g1	335	-	-	-	-	-	-	-
TRINITY_DN10195_c0_g1	1547	GO:1901576;GO:0080090;GO:0032774;GO:0009059;GO:0071555;GO:0045229;GO:0006725;GO:0043226;GO:0051252;GO:0032501;GO:0008150;GO:0042493;GO:0044238;GO:0031323;GO:0005622;GO:0048856;GO:0003676;GO:0006355;GO:0044260;GO:0034654;GO:0009058;GO:0003677;GO:0019222;GO:0044087;GO:0071840;GO:1903506;GO:0043227;GO:0048759;GO:0044249;GO:1901360;GO:0006950;GO:2000112;GO:0065007;GO:0071554;GO:0006351;GO:0044089;GO:…	-	PF02365	3HVG8	K	sp|Q9SL41|NAC37_ARATH NAC domain-containing protein 37 OS=Arabidopsis thaliana OX=3702 GN=NAC037 PE=1 SV=1	NP_001318244.1 vascular related NAC-domain protein 1 [Arabidopsis thaliana] &gt;NP_179397.1 vascular related NAC-domain protein 1 [Arabidopsis thaliana] &gt;Q9SL41.1 RecName: Full=NAC domain-containing protein 37; Short=ANAC037; AltName: Full=Protein VASCULAR RELATED NAC-DOMAIN 1 [Arabidopsis thaliana] &gt;AAD20120.1 putative NAM (no apical meristem)-like protein [Arabidopsis thaliana] &gt;AEC067…
TRINITY_DN101964_c0_g1	372	-	-	PF00076;PF13865	44MH9	A	-	-
TRINITY_DN101966_c0_g1	455	-	K18453	-	34JU8	L	-	KAF6257501.1 NUDIX hydrolase domain-like protein [Scenedesmus sp. NREL 46B-D3]
TRINITY_DN101969_c0_g1	384	-	-	-	3HX5Q	K	-	-
TRINITY_DN10196_c0_g1	1335	-	K12900	-	3HXW4	A	sp|Q9LHP2|SL30A_ARATH Serine/arginine-rich SC35-like splicing factor SCL30A OS=Arabidopsis thaliana OX=3702 GN=SCL30A PE=1 SV=1	XP_010498352.1 PREDICTED: serine/arginine-rich SC35-like splicing factor SCL33 [Camelina sativa]
TRINITY_DN101971_c0_g1	385	-	-	PF01439	3IGBZ	T	sp|P94029|MT2A_ORYSJ Metallothionein-like protein 2A OS=Oryza sativa subsp. japonica OX=39947 GN=MT2A PE=2 SV=1	EEC69949.1 hypothetical protein OsI_00402 [Oryza sativa Indica Group]
TRINITY_DN101972_c0_g1	790	-	-	-	-	-	-	OAP10336.1 hypothetical protein AXX17_AT2G09230 [Arabidopsis thaliana]
TRINITY_DN10197_c0_g1	384	-	-	PF04554	-	-	-	-
TRINITY_DN101980_c0_g1	693	-	-	-	3IG36	O	sp|P52719|PEPS_ASPPH Carboxypeptidase cpdS OS=Aspergillus phoenicis OX=5063 GN=cpdS PE=1 SV=1	XP_023888665.1 carboxypeptidase cpdS-like [Quercus suber]
TRINITY_DN101982_c0_g1	383	-	-	-	-	-	-	-
TRINITY_DN101983_c0_g1	351	-	K02903	PF01778	34IWJ	J	sp|O82204|RL281_ARATH 60S ribosomal protein L28-1 OS=Arabidopsis thaliana OX=3702 GN=RPL28A PE=1 SV=1	GAX84421.1 hypothetical protein CEUSTIGMA_g11842.t1 [Chlamydomonas eustigma]
TRINITY_DN101984_c0_g1	551	GO:0017076;GO:0036094;GO:0005575;GO:0042623;GO:0015399;GO:0008324;GO:0097159;GO:0044425;GO:0015077;GO:0022804;GO:0015318;GO:0005886;GO:1901265;GO:0036442;GO:0006811;GO:0043492;GO:0003674;GO:0032555;GO:0099131;GO:0090662;GO:0006810;GO:0042626;GO:0051234;GO:0016887;GO:0030554;GO:0051179;GO:0008150;GO:0031224;GO:0043167;GO:0016818;GO:0003824;GO:0016462;GO:0032559;GO:0046872;GO:0098660;GO:0055085;GO:…	K01535	-	3GG2J	P	sp|P05030|PMA1_YEAST Plasma membrane ATPase 1 OS=Saccharomyces cerevisiae (strain ATCC 204508 / S288c) OX=559292 GN=PMA1 PE=1 SV=2	XP_023897551.1 plasma membrane ATPase-like [Quercus suber]
TRINITY_DN10198_c0_g1	1971	GO:0044446;GO:0016859;GO:0003824;GO:0044422;GO:0044436;GO:0044267;GO:0044238;GO:0006464;GO:0005622;GO:0003674;GO:0009507;GO:0000413;GO:1901564;GO:0008150;GO:0055035;GO:0031977;GO:0044444;GO:0043226;GO:0009543;GO:0044434;GO:0043412;GO:0019538;GO:0043170;GO:0043227;GO:0009534;GO:0031976;GO:0005575;GO:0009536;GO:0044260;GO:0003755;GO:0009579;GO:0042651;GO:0018193;GO:0016020;GO:0044237;GO:0044435;GO:…	-	-	3HQHS	O	sp|P82869|CYP37_ARATH Peptidyl-prolyl cis-trans isomerase CYP37, chloroplastic OS=Arabidopsis thaliana OX=3702 GN=CYP37 PE=1 SV=3	XP_010503070.1 PREDICTED: peptidyl-prolyl cis-trans isomerase CYP37, chloroplastic-like isoform X1 [Camelina sativa]
TRINITY_DN101993_c0_g1	436	-	K02937	PF08079;PF00327	34GVX	J	sp|Q5ZJ56|RL7_CHICK 60S ribosomal protein L7 OS=Gallus gallus OX=9031 GN=RPL7 PE=2 SV=1	XP_030540656.1 60S ribosomal protein L7-like [Rhodamnia argentea]
TRINITY_DN101994_c0_g1	325	-	-	-	-	-	-	-
TRINITY_DN101996_c0_g1	467	-	-	-	-	-	-	-
TRINITY_DN101997_c0_g1	392	-	-	-	-	-	-	-
TRINITY_DN101999_c0_g1	398	-	-	-	-	-	-	-
TRINITY_DN10199_c0_g1	4059	GO:0005730;GO:0016442;GO:1901699;GO:0003723;GO:0051716;GO:0065007;GO:0044237;GO:0043229;GO:0002252;GO:0016817;GO:0006950;GO:0000166;GO:1901360;GO:0009616;GO:0097367;GO:0035639;GO:0043331;GO:0016893;GO:0043228;GO:0006396;GO:0090502;GO:0050896;GO:0016787;GO:0045087;GO:0009987;GO:1901698;GO:0044424;GO:0052249;GO:0060255;GO:0016891;GO:0010605;GO:0006807;GO:0030422;GO:0032553;GO:0052018;GO:0035821;GO:…	K11592	PF02170;PF00270;PF00636	3HYDM	A	sp|Q9LXW7|DCL3_ARATH Endoribonuclease Dicer homolog 3 OS=Arabidopsis thaliana OX=3702 GN=DCL3 PE=1 SV=2	CAD5324800.1 unnamed protein product [Arabidopsis thaliana]
TRINITY_DN1019_c0_g1	1917	GO:0008270;GO:0097159;GO:0003677;GO:1901363;GO:0005488;GO:0046914;GO:0003674;GO:0003676;GO:0046872;GO:0043167;GO:0043169	-	PF01754;PF01428	3I09F	S	sp|Q8H0X0|SAP2_ARATH Zinc finger A20 and AN1 domain-containing stress-associated protein 2 OS=Arabidopsis thaliana OX=3702 GN=SAP2 PE=2 SV=2	XP_006393072.2 zinc finger A20 and AN1 domain-containing stress-associated protein 2 [Eutrema salsugineum] &gt;ESQ30357.1 hypothetical protein EUTSA_v10012263mg [Eutrema salsugineum]
TRINITY_DN1019_c1_g1	850	-	K07955	-	4JKRU	U	sp|Q8VY57|ARL8A_ARATH ADP-ribosylation factor-like protein 8a OS=Arabidopsis thaliana OX=3702 GN=ARL8A PE=2 SV=1	XP_028107738.1 ADP-ribosylation factor-like protein 8a isoform X1 [Camellia sinensis]
TRINITY_DN1019_c2_g1	1425	-	K01792	PF01263	3HN9Z	G	sp|Q40784|AAPC_CENCI Putative glucose-6-phosphate 1-epimerase OS=Cenchrus ciliaris OX=35872 PE=2 SV=1	CAE6245334.1 unnamed protein product [Arabidopsis arenosa]
TRINITY_DN101_c0_g1	2704	GO:0009987;GO:0044424;GO:0010556;GO:0008152;GO:0016070;GO:0006139;GO:0009889;GO:0010467;GO:0097659;GO:0034641;GO:1901363;GO:0006807;GO:0005737;GO:0060255;GO:0051171;GO:0043229;GO:0044237;GO:0065007;GO:0006351;GO:0090304;GO:2000112;GO:0071704;GO:0000166;GO:1901360;GO:0043231;GO:0044464;GO:0005623;GO:0005488;GO:1903506;GO:0010468;GO:0019219;GO:0031326;GO:0043227;GO:1901265;GO:0044249;GO:0043170;GO:…	-	PF01429	3I1BD	K	sp|Q9LW00|MBD11_ARATH Methyl-CpG-binding domain-containing protein 11 OS=Arabidopsis thaliana OX=3702 GN=MBD11 PE=1 SV=1	XP_010503441.1 PREDICTED: methyl-CpG-binding domain-containing protein 11 [Camelina sativa] &gt;XP_010503451.1 PREDICTED: methyl-CpG-binding domain-containing protein 11 [Camelina sativa] &gt;XP_010503459.1 PREDICTED: methyl-CpG-binding domain-containing protein 11 [Camelina sativa]
TRINITY_DN102008_c0_g1	475	-	-	PF05938	-	-	sp|Q9FMQ4|SPH3_ARATH S-protein homolog 3 OS=Arabidopsis thaliana OX=3702 GN=SPH3 PE=2 SV=1	XP_006301229.1 S-protein homolog 4 [Capsella rubella] &gt;EOA34127.1 hypothetical protein CARUB_v10021628mg [Capsella rubella]
TRINITY_DN102009_c0_g1	412	-	-	PF00089	-	-	sp|Q2VG86|BAEE_BOMMO CLIP domain-containing serine protease 2 OS=Bombyx mori OX=7091 PE=1 SV=1	-
TRINITY_DN102010_c0_g1	517	GO:0072593;GO:0005488;GO:0005623;GO:0044464;GO:0006950;GO:0043231;GO:0046906;GO:0048037;GO:0045926;GO:1990748;GO:0016020;GO:0051716;GO:0009056;GO:0065007;GO:0017001;GO:0020037;GO:0044237;GO:0043229;GO:0016999;GO:0005737;GO:1901363;GO:0098754;GO:0005576;GO:0016491;GO:0050896;GO:0098869;GO:0043169;GO:0048519;GO:0031090;GO:0055114;GO:0070887;GO:0008152;GO:0044424;GO:0009987;GO:0042221;GO:0040008;GO:…	K00430	-	3HZAI	Q	sp|P00433|PER1A_ARMRU Peroxidase C1A OS=Armoracia rusticana OX=3704 GN=PRXC1A PE=1 SV=2	KAF2535745.1 hypothetical protein F2Q68_00020715 [Brassica cretica]
TRINITY_DN102012_c0_g1	390	-	K01581	-	34J9B	E	sp|P31851|TABA_PSEAJ Protein TabA OS=Pseudomonas amygdali pv. tabaci OX=322 GN=tabA PE=3 SV=1	KAF6262018.1 ornithine decarboxylase 2 [Scenedesmus sp. NREL 46B-D3]
TRINITY_DN102017_c0_g1	326	-	K11643	PF00176	389PT	K	sp|D3ZA12|CHD6_RAT Chromodomain-helicase-DNA-binding protein 6 OS=Rattus norvegicus OX=10116 GN=Chd6 PE=1 SV=2	XP_003062867.1 predicted protein [Micromonas pusilla CCMP1545] &gt;EEH52806.1 predicted protein [Micromonas pusilla CCMP1545]
TRINITY_DN102018_c0_g1	430	-	-	-	-	-	-	-
TRINITY_DN10201_c0_g1	675	GO:0043167;GO:0010014;GO:0048532;GO:0001708;GO:0007389;GO:0046872;GO:0009888;GO:0005622;GO:0048856;GO:0043229;GO:0003674;GO:0048507;GO:0032502;GO:0005623;GO:0044464;GO:0005488;GO:0090421;GO:0043231;GO:0005634;GO:0043226;GO:0008150;GO:0032501;GO:0009653;GO:0043169;GO:0045165;GO:0009933;GO:0009790;GO:0030154;GO:0009987;GO:0044424;GO:0043227;GO:0007275;GO:0005575;GO:0009880;GO:0048869	-	-	3HMBI	S	sp|Q84TI3|OBE4_ARATH Protein OBERON 4 OS=Arabidopsis thaliana OX=3702 GN=OBE4 PE=1 SV=2	VVB06734.1 unnamed protein product [Arabis nemorensis]
TRINITY_DN10202_c0_g1	1820	GO:2001141;GO:0005575;GO:0140110;GO:0051172;GO:0009314;GO:0043170;GO:0019538;GO:0050789;GO:0048523;GO:0006508;GO:0019219;GO:0010468;GO:0031326;GO:0010558;GO:0003674;GO:0005634;GO:0005829;GO:0009628;GO:0031327;GO:0007154;GO:0009581;GO:0044267;GO:0032991;GO:0044422;GO:2000113;GO:0044446;GO:0071214;GO:0009583;GO:0044428;GO:0050794;GO:0005737;GO:0030163;GO:0070646;GO:0048519;GO:0009889;GO:0010017;GO:…	K12176	PF01399	3HNQE	OT	sp|Q8W207|CSN2_ARATH COP9 signalosome complex subunit 2 OS=Arabidopsis thaliana OX=3702 GN=CSN2 PE=1 SV=1	XP_006408590.1 COP9 signalosome complex subunit 2 [Eutrema salsugineum] &gt;ESQ50043.1 hypothetical protein EUTSA_v10001988mg [Eutrema salsugineum] &gt;BAJ33758.1 unnamed protein product [Eutrema halophilum]
TRINITY_DN102033_c0_g1	339	-	-	-	-	-	-	-
TRINITY_DN102035_c0_g1	378	-	-	-	-	-	-	-
TRINITY_DN102037_c0_g1	325	-	-	-	-	-	-	-
TRINITY_DN102038_c0_g1	322	-	-	PF17917	3G8MV	L	sp|P04323|POL3_DROME Retrovirus-related Pol polyprotein from transposon 17.6 OS=Drosophila melanogaster OX=7227 GN=pol PE=4 SV=1	GIL49617.1 hypothetical protein Vafri_5892 [Volvox africanus]
TRINITY_DN10203_c0_g1	1197	GO:0009914;GO:0071495;GO:0009628;GO:0006810;GO:0007154;GO:0051234;GO:0010647;GO:0009630;GO:0051179;GO:0008150;GO:0009966;GO:0023056;GO:0080050;GO:0065008;GO:0009606;GO:0050794;GO:0009967;GO:0010033;GO:0005575;GO:0023051;GO:0009629;GO:0050793;GO:0071310;GO:0048638;GO:0050789;GO:0005886;GO:0010646;GO:0071944;GO:0051239;GO:0005623;GO:0044464;GO:0010929;GO:0009719;GO:0051716;GO:0016020;GO:0065007;GO:…	-	-	3HTUZ	S	sp|Q9LVK2|BIG1A_ARATH Protein BIG GRAIN 1-like A OS=Arabidopsis thaliana OX=3702 GN=At3g13980 PE=3 SV=1	XP_013583959.1 PREDICTED: uncharacterized protein LOC106292842 [Brassica oleracea var. oleracea]
TRINITY_DN102040_c0_g1	315	GO:0005886;GO:0005575;GO:0044464;GO:0005623;GO:0071944;GO:0031224;GO:0016020;GO:0044425;GO:0016021	-	-	3HRNB	S	sp|F4JGB6|RLP46_ARATH Receptor-like protein 46 OS=Arabidopsis thaliana OX=3702 GN=RLP46 PE=3 SV=1	VDC81304.1 unnamed protein product [Brassica rapa]
TRINITY_DN102044_c0_g1	312	-	-	PF19028	-	-	sp|B3EWY9|MLP_ACRMI Mucin-like protein (Fragment) OS=Acropora millepora OX=45264 PE=1 SV=1	-
TRINITY_DN10204_c0_g1	1164	GO:0065007;GO:0016020;GO:0051716;GO:0009719;GO:1901701;GO:0050794;GO:0071944;GO:0071396;GO:0001101;GO:0071495;GO:0044464;GO:0005623;GO:0007154;GO:0033993;GO:0071215;GO:0008150;GO:0009737;GO:0071310;GO:0050896;GO:0070887;GO:0005886;GO:0050789;GO:0042221;GO:0009987;GO:0007165;GO:0009738;GO:0009725;GO:0010033;GO:0071229;GO:0097306;GO:0009755;GO:0005575;GO:0023052;GO:0097305;GO:0032870;GO:1901700	-	-	3HUKQ	S	sp|Q84JK8|MAKR6_ARATH Probable membrane-associated kinase regulator 6 OS=Arabidopsis thaliana OX=3702 GN=MAKR6 PE=2 SV=1	XP_010445387.1 PREDICTED: probable membrane-associated kinase regulator 6 [Camelina sativa]
TRINITY_DN102050_c0_g1	390	GO:0019222;GO:0044425;GO:0051384;GO:0071385;GO:0031974;GO:0006605;GO:1990904;GO:0044260;GO:0033365;GO:0043227;GO:0022625;GO:0044249;GO:0045184;GO:0048731;GO:0071310;GO:0097421;GO:0090150;GO:0008150;GO:1901564;GO:0006725;GO:0051234;GO:0044444;GO:0009059;GO:1901576;GO:0071396;GO:0010629;GO:0030867;GO:0006613;GO:0042493;GO:0005789;GO:0044265;GO:0008104;GO:0072657;GO:0006401;GO:0015833;GO:0070727;GO:…	K02912	-	KOG0878	J	sp|Q236T0|RL32_TETTS 60S ribosomal protein L32 OS=Tetrahymena thermophila (strain SB210) OX=312017 GN=RPL32 PE=1 SV=1	XP_023909564.1 60S ribosomal protein L32-like [Quercus suber]
TRINITY_DN102052_c0_g1	503	GO:0043168;GO:0005215;GO:0005524;GO:1902600;GO:0019637;GO:0009206;GO:0016020;GO:0015075;GO:0022890;GO:0009152;GO:0071704;GO:0009144;GO:0099132;GO:0006796;GO:0044464;GO:0005623;GO:0005488;GO:0006163;GO:0043231;GO:0006754;GO:0008152;GO:0009259;GO:0008144;GO:0006164;GO:0044769;GO:0006753;GO:0006139;GO:0098796;GO:0098662;GO:0009141;GO:0034641;GO:0017111;GO:0005737;GO:0022857;GO:0009168;GO:1901137;GO:…	K02133	PF02874	34H1M	C	sp|Q9GPE9|ATPB_TRYBB ATP synthase subunit beta, mitochondrial OS=Trypanosoma brucei brucei OX=5702 GN=Tb427.03.1380 PE=1 SV=2	AMP19647.1 ATP synthase beta subunit [Dictyosphaerium ehrenbergianum]
TRINITY_DN102057_c0_g1	319	-	-	-	-	-	-	-
TRINITY_DN10205_c0_g1	1057	GO:0055114;GO:0034357;GO:0050896;GO:0043169;GO:0016168;GO:0009523;GO:0008152;GO:0042221;GO:0009987;GO:0044424;GO:0006807;GO:0005737;GO:0098796;GO:0031984;GO:0016491;GO:0009535;GO:0009772;GO:0019684;GO:1901363;GO:0009521;GO:0016021;GO:0016020;GO:0043168;GO:0045156;GO:0043229;GO:0044435;GO:0044237;GO:0044464;GO:0005488;GO:0005623;GO:0009635;GO:0043231;GO:0022900;GO:0006950;GO:0036211;GO:0071704;GO:…	K03243	-	3HSGF	J	sp|O60841|IF2P_HUMAN Eukaryotic translation initiation factor 5B OS=Homo sapiens OX=9606 GN=EIF5B PE=1 SV=4	XP_018451698.1 PREDICTED: eukaryotic translation initiation factor 5B-like isoform X2 [Raphanus sativus]
TRINITY_DN102061_c0_g1	312	-	-	-	-	-	-	-
TRINITY_DN102062_c0_g1	307	-	-	-	-	-	-	-
TRINITY_DN102064_c0_g1	382	-	-	-	-	-	-	-
TRINITY_DN102068_c0_g1	761	GO:0006807;GO:0070011;GO:0003674;GO:1901564;GO:0008150;GO:0008238;GO:0071704;GO:0003824;GO:0140096;GO:0008236;GO:0017171;GO:0070008;GO:0019538;GO:0044238;GO:0004185;GO:0043170;GO:0004180;GO:0016787;GO:0006508;GO:0008152;GO:0008233	K16297	PF00450	3GD3F	O	sp|A0A0C3VJP4|SCP1_MEDTR Serine carboxypeptidase 1 OS=Medicago truncatula OX=3880 GN=SCP1 PE=1 SV=3	XP_015972453.1 serine carboxypeptidase II-3 isoform X1 [Arachis duranensis]
TRINITY_DN102073_c0_g1	401	-	-	-	-	-	-	-
TRINITY_DN102074_c0_g1	325	-	-	-	-	-	-	-
TRINITY_DN102078_c0_g1	432	-	K02891	PF01776	4JPTR	J	sp|P50886|RL22_XENLA 60S ribosomal protein L22 OS=Xenopus laevis OX=8355 GN=rpl22 PE=2 SV=2	XP_030477163.1 60S ribosomal protein L22-2 [Syzygium oleosum] &gt;XP_030477164.1 60S ribosomal protein L22-2 [Syzygium oleosum] &gt;XP_030477165.1 60S ribosomal protein L22-2 [Syzygium oleosum]
TRINITY_DN10207_c0_g1	616	GO:0044425;GO:0016773;GO:0016310;GO:0097159;GO:0005575;GO:0017076;GO:0036094;GO:0044260;GO:1901265;GO:0043412;GO:0005886;GO:0019538;GO:0043170;GO:1901564;GO:0008150;GO:0030554;GO:0032555;GO:0003674;GO:0006464;GO:0032559;GO:0003824;GO:0044267;GO:0043167;GO:0044238;GO:0031224;GO:1901363;GO:0016021;GO:0006793;GO:0006807;GO:0032553;GO:0004672;GO:0006468;GO:0008152;GO:0009987;GO:0008144;GO:0140096;GO:…	-	PF13855;PF00560	3HMP2	T	sp|Q93Y06|Y5720_ARATH Probable inactive receptor kinase At5g67200 OS=Arabidopsis thaliana OX=3702 GN=At5g67200 PE=1 SV=1	VDD37410.1 unnamed protein product [Brassica oleracea]
TRINITY_DN102080_c0_g1	344	-	-	-	-	-	-	-
TRINITY_DN102083_c0_g1	372	-	-	-	-	-	-	-
TRINITY_DN10208_c0_g1	709	GO:0043169;GO:0048519;GO:0006139;GO:0010467;GO:0009889;GO:0051213;GO:0008152;GO:0010556;GO:0010228;GO:0009741;GO:0042221;GO:0048366;GO:0009725;GO:0016070;GO:0003006;GO:0000902;GO:0016570;GO:0022414;GO:0033044;GO:0034641;GO:0031399;GO:0051248;GO:0060560;GO:0016491;GO:0009719;GO:0014070;GO:0035067;GO:0033043;GO:0032502;GO:0005623;GO:0044464;GO:0005488;GO:0043231;GO:0033993;GO:0051276;GO:0048367;GO:…	-	PF02375	3HQWQ	K	sp|Q9STM3|REF6_ARATH Lysine-specific demethylase REF6 OS=Arabidopsis thaliana OX=3702 GN=REF6 PE=1 SV=1	CAE6075497.1 unnamed protein product [Arabidopsis arenosa]
TRINITY_DN102090_c0_g1	651	-	-	-	-	-	-	-
TRINITY_DN102091_c0_g1	330	-	-	-	-	-	-	-
TRINITY_DN102092_c0_g1	352	-	-	-	-	-	-	-
TRINITY_DN102095_c0_g1	340	-	-	-	-	-	-	-
TRINITY_DN102096_c0_g1	858	-	-	-	-	-	-	-
TRINITY_DN102098_c0_g1	351	GO:0072521;GO:0009165;GO:0009056;GO:0044283;GO:0046700;GO:0055086;GO:0044237;GO:0016740;GO:0009179;GO:0016301;GO:1901360;GO:0000166;GO:0044281;GO:0035639;GO:0097367;GO:0072330;GO:0031420;GO:0072524;GO:0009199;GO:0034655;GO:1901361;GO:0009987;GO:0044424;GO:0006807;GO:0016053;GO:0032787;GO:1901293;GO:1901135;GO:0032553;GO:0009201;GO:0006757;GO:0051188;GO:0006793;GO:0034404;GO:1901363;GO:0009127;GO:…	K00873	PF00224	3ICG4	G	sp|P30615|KPYK1_TRYBB Pyruvate kinase 1 OS=Trypanosoma brucei brucei OX=5702 GN=PYK1 PE=1 SV=1	XP_001421558.1 predicted protein [Ostreococcus lucimarinus CCE9901] &gt;ABO99851.1 predicted protein [Ostreococcus lucimarinus CCE9901]
TRINITY_DN10209_c0_g1	1996	GO:0044238;GO:0016798;GO:0016020;GO:0031224;GO:0003824;GO:0005975;GO:0004553;GO:0008152;GO:0004650;GO:0016787;GO:0003674;GO:0005575;GO:0016021;GO:0071704;GO:0044425;GO:0008150	-	PF00295	3HXC5	G	sp|A7PZL3|PGLR_VITVI Probable polygalacturonase OS=Vitis vinifera OX=29760 GN=GSVIVT00026920001 PE=1 SV=1	CAE5966392.1 unnamed protein product [Arabidopsis arenosa]
TRINITY_DN1020_c0_g1	2418	GO:0031224;GO:0016021;GO:0016020;GO:0005575;GO:0044425	-	PF11926;PF00226	3HZ7V	O	sp|Q28I38|DJB14_XENTR DnaJ homolog subfamily B member 14 OS=Xenopus tropicalis OX=8364 GN=dnajb14 PE=2 SV=1	XP_020883593.1 uncharacterized protein LOC9316752 [Arabidopsis lyrata subsp. lyrata] &gt;EFH55121.1 DNAJ heat shock N-terminal domain-containing protein [Arabidopsis lyrata subsp. lyrata]
TRINITY_DN102101_c0_g1	344	-	-	-	-	-	-	-
TRINITY_DN102103_c0_g1	309	-	-	-	-	-	-	-
TRINITY_DN102107_c0_g1	429	GO:0043043;GO:0009058;GO:0044260;GO:1990904;GO:0005575;GO:0005840;GO:0031974;GO:0043604;GO:0015934;GO:0044249;GO:0022625;GO:0043227;GO:0019538;GO:0070013;GO:0043170;GO:0044444;GO:0043603;GO:0043226;GO:0043232;GO:0044271;GO:0008150;GO:1901564;GO:0003674;GO:1901576;GO:0005829;GO:0005634;GO:0009059;GO:0005622;GO:0034645;GO:0044428;GO:1901566;GO:0044267;GO:0044391;GO:0044238;GO:0044446;GO:0044422;GO:…	K02905	-	4JURU	J	sp|P05747|RL29_YEAST 60S ribosomal protein L29 OS=Saccharomyces cerevisiae (strain ATCC 204508 / S288c) OX=559292 GN=RPL29 PE=1 SV=3	KAB8659305.1 hypothetical protein FH972_026194 [Carpinus fangiana]
TRINITY_DN10210_c0_g1	915	GO:0044271;GO:0043226;GO:0006725;GO:0051252;GO:0018130;GO:0008150;GO:0080090;GO:1901576;GO:0032774;GO:0003674;GO:0005634;GO:0009059;GO:0046483;GO:0005622;GO:0034645;GO:0003700;GO:0050794;GO:0003676;GO:0044238;GO:0031323;GO:0140110;GO:0009058;GO:0019438;GO:0003677;GO:0097159;GO:0019222;GO:0006355;GO:2001141;GO:0044260;GO:0005575;GO:0034654;GO:0005515;GO:0019219;GO:1903506;GO:0010468;GO:0031326;GO:…	-	-	3HT75	K	sp|Q9SRT2|BH062_ARATH Transcription factor bHLH62 OS=Arabidopsis thaliana OX=3702 GN=BHLH62 PE=2 SV=1	VVA96806.1 unnamed protein product [Arabis nemorensis]
TRINITY_DN10210_c0_g2	685	GO:0034645;GO:0050794;GO:0003700;GO:0003676;GO:0005622;GO:0044238;GO:0031323;GO:0018130;GO:0008150;GO:0044271;GO:0043226;GO:0006725;GO:0051252;GO:0009059;GO:0005634;GO:0046483;GO:0080090;GO:1901576;GO:0003674;GO:0032774;GO:0043227;GO:0031326;GO:0044249;GO:0005515;GO:0019219;GO:0010468;GO:1903506;GO:1901362;GO:0050789;GO:0043170;GO:0019222;GO:0140110;GO:0009058;GO:0019438;GO:0097159;GO:0003677;GO:…	-	-	3HT75	K	sp|Q9SRT2|BH062_ARATH Transcription factor bHLH62 OS=Arabidopsis thaliana OX=3702 GN=BHLH62 PE=2 SV=1	XP_006297628.1 transcription factor bHLH62 [Capsella rubella] &gt;EOA30526.1 hypothetical protein CARUB_v10013649mg [Capsella rubella]
TRINITY_DN102110_c0_g1	348	-	-	-	-	-	-	-
TRINITY_DN102117_c0_g1	388	-	K01610	PF01293	34JQE	G	sp|Q96UL8|PCKA_EMENI Phosphoenolpyruvate carboxykinase (ATP) OS=Emericella nidulans (strain FGSC A4 / ATCC 38163 / CBS 112.46 / NRRL 194 / M139) OX=227321 GN=acuF PE=3 SV=3	BAK02198.1 predicted protein [Hordeum vulgare subsp. vulgare]
TRINITY_DN10211_c0_g1	444	-	-	-	-	-	-	XP_011013113.1 PREDICTED: LOW QUALITY PROTEIN: uncharacterized protein LOC105117228 [Populus euphratica]
TRINITY_DN102126_c0_g1	309	-	K14488	-	-	-	sp|Q41220|SAU15_ARATH Auxin-responsive protein SAUR15 OS=Arabidopsis thaliana OX=3702 GN=SAUR15 PE=1 SV=1	XP_018469389.1 PREDICTED: auxin-responsive protein SAUR20 [Raphanus sativus]
TRINITY_DN102127_c0_g1	376	-	K17499	PF00481	34JBR	T	sp|P49596|PP2C2_CAEEL Probable protein phosphatase 2C T23F11.1 OS=Caenorhabditis elegans OX=6239 GN=ppm-2 PE=3 SV=2	XP_023872775.1 protein phosphatase 2C homolog 2-like [Quercus suber]
TRINITY_DN10212_c0_g1	1545	GO:0044428;GO:0005622;GO:0044446;GO:0044422;GO:0006457;GO:0008150;GO:0051082;GO:0044444;GO:0043226;GO:0030234;GO:0050790;GO:0005829;GO:0005634;GO:0003674;GO:0008047;GO:0043227;GO:0043462;GO:0005515;GO:0005886;GO:0098772;GO:0070013;GO:0065009;GO:0005575;GO:0051336;GO:0031974;GO:0043229;GO:0043085;GO:0043233;GO:0001671;GO:0060590;GO:0065007;GO:0016020;GO:0044093;GO:0031981;GO:0051087;GO:0005623;GO:…	K09510	PF00226	3HWG9	O	sp|Q9QYJ3|DNJB1_MOUSE DnaJ homolog subfamily B member 1 OS=Mus musculus OX=10090 GN=Dnajb1 PE=1 SV=3	VDD50797.1 unnamed protein product [Brassica oleracea]
TRINITY_DN102133_c0_g1	485	-	K00658	PF00364	34N1X	C	sp|Q8H107|ODO2B_ARATH Dihydrolipoyllysine-residue succinyltransferase component of 2-oxoglutarate dehydrogenase complex 2, mitochondrial OS=Arabidopsis thaliana OX=3702 GN=At4g26910 PE=1 SV=2	KAF6252059.1 single hybrid motif-containing protein [Scenedesmus sp. NREL 46B-D3]
TRINITY_DN102134_c0_g1	624	GO:0043130;GO:0044265;GO:0030163;GO:0005737;GO:0006807;GO:0009057;GO:0051603;GO:0044424;GO:0009987;GO:0008152;GO:0071704;GO:1901575;GO:0043632;GO:0043231;GO:0044464;GO:0005623;GO:0005488;GO:0043229;GO:0044237;GO:1901565;GO:0009056;GO:0006511;GO:0005575;GO:0044260;GO:0043227;GO:0005515;GO:0006508;GO:0043170;GO:0032182;GO:0044257;GO:0019538;GO:0008150;GO:1901564;GO:0043226;GO:0019941;GO:0005634;GO:…	-	PF00789	3HPW9	O	sp|Q9LUG7|PUX12_ARATH Plant UBX domain-containing protein 12 OS=Arabidopsis thaliana OX=3702 GN=PUX12 PE=2 SV=1	XP_002883438.2 plant UBX domain-containing protein 12 [Arabidopsis lyrata subsp. lyrata]
TRINITY_DN102137_c0_g1	609	-	K13449	PF00188	3GI6S	S	sp|Q04108|PR04_SOLLC Pathogenesis-related leaf protein 4 OS=Solanum lycopersicum OX=4081 PE=2 SV=1	CAE5959801.1 unnamed protein product [Arabidopsis arenosa]
TRINITY_DN102138_c0_g1	397	-	-	-	-	-	-	-
TRINITY_DN10213_c0_g1	302	GO:0012505;GO:0044464;GO:0005623;GO:0005575	-	-	3HQ8Q	U	-	XP_006397735.1 BEACH domain-containing protein C2 [Eutrema salsugineum] &gt;XP_024010746.1 BEACH domain-containing protein C2 [Eutrema salsugineum] &gt;ESQ39188.1 hypothetical protein EUTSA_v10001277mg [Eutrema salsugineum]
TRINITY_DN102140_c0_g1	304	GO:0051716;GO:0009719;GO:0065007;GO:0043229;GO:0048518;GO:0051239;GO:0043231;GO:0001101;GO:0005623;GO:0044464;GO:0033993;GO:1900140;GO:0071215;GO:0050896;GO:0009737;GO:0048580;GO:0070887;GO:0009987;GO:0044424;GO:0042221;GO:0007165;GO:0009725;GO:0071229;GO:0009755;GO:2000026;GO:0005737;GO:0023052;GO:0032870;GO:0097305;GO:0051240;GO:1901701;GO:0005622;GO:0050794;GO:0048582;GO:0071396;GO:0051094;GO:…	-	PF01161	44DT8	S	sp|P31729|OV16_ONCVO OV-16 antigen OS=Onchocerca volvulus OX=6282 GN=OV16 PE=2 SV=2	XP_030541625.1 protein D3-like [Rhodamnia argentea]
TRINITY_DN102143_c0_g1	325	-	-	-	-	-	-	-
TRINITY_DN102145_c0_g1	331	GO:0009579;GO:0044425;GO:0042651;GO:0015979;GO:0097159;GO:0009536;GO:0009522;GO:0005575;GO:0044260;GO:0043227;GO:0009534;GO:0031976;GO:0043412;GO:0043170;GO:0019538;GO:0055035;GO:1901564;GO:0008150;GO:0043226;GO:0044434;GO:0044444;GO:0006091;GO:0009507;GO:0003674;GO:0005622;GO:0006464;GO:0046872;GO:0044422;GO:0044436;GO:0032991;GO:0044446;GO:0018298;GO:0031224;GO:0044238;GO:0043167;GO:0044267;GO:…	-	-	3GAA9	C	-	KAF8057671.1 Chlorophyll a-b binding protein of LHCII type I [Scenedesmus sp. PABB004]
TRINITY_DN10214_c0_g1	2791	GO:0001101;GO:0071236;GO:0006950;GO:0016301;GO:0044464;GO:0006796;GO:0005623;GO:0005488;GO:0000166;GO:0071944;GO:0071704;GO:0036211;GO:0035639;GO:0097367;GO:0071395;GO:0009605;GO:0014070;GO:0051716;GO:0016020;GO:0009719;GO:0044237;GO:0043207;GO:0005524;GO:0043168;GO:0016740;GO:0006807;GO:0046677;GO:0071229;GO:0032553;GO:0035690;GO:0006793;GO:0032870;GO:1901363;GO:0070887;GO:0140096;GO:0009611;GO:…	-	PF00069;PF07714	3HPDD	T	sp|O48837|LRKS2_ARATH Receptor like protein kinase S.2 OS=Arabidopsis thaliana OX=3702 GN=LECRKS2 PE=2 SV=2	XP_002879418.1 receptor like protein kinase S.2 [Arabidopsis lyrata subsp. lyrata] &gt;EFH55677.1 hypothetical protein ARALYDRAFT_902344 [Arabidopsis lyrata subsp. lyrata]
TRINITY_DN102152_c0_g1	368	-	-	-	-	-	-	-
TRINITY_DN102153_c0_g1	947	GO:0005737;GO:0006807;GO:0006518;GO:0034641;GO:0043228;GO:0010467;GO:0022626;GO:0008152;GO:0006412;GO:0009987;GO:0044424;GO:0003735;GO:0005623;GO:0044464;GO:0043231;GO:0005198;GO:0031981;GO:0071704;GO:0043233;GO:0005730;GO:0044445;GO:0043229;GO:0044237;GO:1990904;GO:0044260;GO:0005575;GO:0005840;GO:0031974;GO:0009536;GO:0043043;GO:0009058;GO:0019538;GO:0070013;GO:0043170;GO:0043604;GO:0044249;GO:…	K02889	PF01157	44N9Q	J	sp|Q54X53|RL21_DICDI 60S ribosomal protein L21 OS=Dictyostelium discoideum OX=44689 GN=rpl21 PE=3 SV=1	XP_004249186.1 60S ribosomal protein L21-2 [Solanum lycopersicum] &gt;XP_015056096.1 60S ribosomal protein L21-2 [Solanum pennellii] &gt;TMW93307.1 hypothetical protein EJD97_011903 [Solanum chilense]
TRINITY_DN10215_c0_g1	351	-	-	-	-	-	-	-
TRINITY_DN102160_c0_g1	321	-	-	PF08421	-	-	sp|Q9L9E7|NOVU_STRNV C-methyltransferase NovU OS=Streptomyces niveus OX=193462 GN=novU PE=3 SV=2	-
TRINITY_DN102164_c0_g1	303	GO:1901360;GO:0006950;GO:2000112;GO:0065007;GO:0045892;GO:0006351;GO:0000976;GO:0016740;GO:0051193;GO:0043229;GO:0044237;GO:0051171;GO:0006807;GO:0010605;GO:0060255;GO:1901363;GO:0000977;GO:0050896;GO:0097659;GO:0044424;GO:0009987;GO:0001067;GO:0032774;GO:1901576;GO:0080090;GO:0010310;GO:0009059;GO:0051252;GO:0043226;GO:0006725;GO:1903507;GO:1901564;GO:0008150;GO:0031323;GO:0044238;GO:0003824;GO:…	K12236	-	4JJQ7	K	sp|B1AY10|NFX1_MOUSE Transcriptional repressor NF-X1 OS=Mus musculus OX=10090 GN=Nfx1 PE=1 SV=1	XP_020205230.1 NF-X1-type zinc finger protein NFXL1 [Cajanus cajan] &gt;XP_020205231.1 NF-X1-type zinc finger protein NFXL1 [Cajanus cajan] &gt;XP_020205232.1 NF-X1-type zinc finger protein NFXL1 [Cajanus cajan]
TRINITY_DN102169_c0_g1	451	-	-	PF01741	2S7M9	M	sp|A0A097ZPE6|ANDL_EMEVA Anditomin synthesis protein L OS=Emericella variicolor OX=1549217 GN=andL PE=3 SV=1	KAB8338830.1 hypothetical protein FH972_021774 [Carpinus fangiana]
TRINITY_DN102173_c0_g1	393	-	-	-	-	-	-	-
TRINITY_DN102178_c0_g1	347	GO:0050794;GO:0048523;GO:0050789;GO:0016020;GO:0048519;GO:0065007;GO:0031224;GO:0008150;GO:0044425;GO:0016021;GO:0008285;GO:0005575;GO:0042127	-	PF04749	4JTX5	S	-	XP_030474397.1 protein PLANT CADMIUM RESISTANCE 2-like [Syzygium oleosum]
TRINITY_DN10217_c0_g1	2086	GO:0003674;GO:0006950;GO:0098542;GO:1901575;GO:1901564;GO:0008150;GO:0071704;GO:0016020;GO:0044238;GO:0009056;GO:0031224;GO:0003824;GO:0009605;GO:1901565;GO:0004175;GO:0008233;GO:0051704;GO:0043207;GO:0070011;GO:0005575;GO:0006807;GO:0009057;GO:0030163;GO:0009607;GO:0016021;GO:0044425;GO:0050896;GO:0019538;GO:0006952;GO:0043170;GO:0070001;GO:0140096;GO:0051707;GO:0050832;GO:0006508;GO:0008152;GO:…	-	PF14541;PF14543	3HSMC	O	sp|Q9M9A8|APCB1_ARATH Aspartyl protease APCB1 OS=Arabidopsis thaliana OX=3702 GN=APCB1 PE=1 SV=1	XP_002891474.1 aspartyl protease APCB1 isoform X1 [Arabidopsis lyrata subsp. lyrata] &gt;EFH67733.1 aspartyl protease family protein [Arabidopsis lyrata subsp. lyrata]
TRINITY_DN102181_c0_g1	679	-	-	-	-	-	-	-
TRINITY_DN102185_c0_g1	844	-	K15119	PF00153	34I86	C	sp|Q0VCH6|S2540_BOVIN Solute carrier family 25 member 40 OS=Bos taurus OX=9913 GN=SLC25A40 PE=2 SV=1	KAF6252184.1 mitochondrial carrier domain-containing protein [Scenedesmus sp. NREL 46B-D3]
TRINITY_DN102186_c0_g1	416	-	-	-	-	-	-	-
TRINITY_DN102188_c0_g1	333	-	-	-	-	-	-	-
TRINITY_DN10218_c0_g1	1156	-	-	PF10674	3HV1F	S	sp|P72777|YC54L_SYNY3 Ycf54-like protein OS=Synechocystis sp. (strain PCC 6803 / Kazusa) OX=1111708 GN=slr1780 PE=1 SV=1	CAE6247209.1 unnamed protein product [Arabidopsis arenosa]
TRINITY_DN102193_c0_g1	597	-	-	-	-	-	-	KAF6257975.1 hypothetical protein COO60DRAFT_1701539 [Scenedesmus sp. NREL 46B-D3]
TRINITY_DN102196_c0_g1	356	-	-	-	-	-	-	-
TRINITY_DN102198_c0_g1	358	-	-	-	-	-	-	-
TRINITY_DN10219_c0_g1	380	GO:0090114;GO:0005794;GO:0045184;GO:0006900;GO:0051049;GO:0043227;GO:0051650;GO:0007029;GO:0010604;GO:0070863;GO:0071840;GO:0010628;GO:0090087;GO:0044431;GO:0006888;GO:0019222;GO:0044425;GO:0051648;GO:0022607;GO:0071702;GO:0048207;GO:0070861;GO:0005622;GO:1903829;GO:0010256;GO:0006903;GO:0005789;GO:0012505;GO:0051234;GO:0044444;GO:0043226;GO:0008150;GO:0070201;GO:0051649;GO:0051050;GO:0006901;GO:…	K20353	-	3HS6S	U	sp|Q9FGK9|MAG5_ARATH Protein transport protein SEC16A homolog OS=Arabidopsis thaliana OX=3702 GN=MAG5 PE=1 SV=1	CAE6213877.1 unnamed protein product [Arabidopsis arenosa]
TRINITY_DN1021_c0_g1	1134	-	-	PF07816	3HYRR	S	-	NP_201083.1 membrane-associated kinase regulator, putative (DUF1645) [Arabidopsis thaliana] &gt;AAV91328.1 At5g62770 [Arabidopsis thaliana] &gt;AAW39007.1 At5g62770 [Arabidopsis thaliana] &gt;AED97655.1 membrane-associated kinase regulator, putative (DUF1645) [Arabidopsis thaliana] &gt;OAO92749.1 hypothetical protein AXX17_AT5G62310 [Arabidopsis thaliana] &gt;CAA0411585.1 unnamed protein product …
TRINITY_DN102202_c0_g1	476	-	-	-	-	-	-	-
TRINITY_DN102204_c0_g1	371	GO:0060255;GO:0005737;GO:0006807;GO:0051171;GO:0034248;GO:0009889;GO:0032268;GO:0050896;GO:0044424;GO:0009987;GO:0008152;GO:0009409;GO:0010556;GO:0006950;GO:0043231;GO:0120025;GO:0005623;GO:0044464;GO:0016567;GO:0071704;GO:0036211;GO:2000112;GO:0010608;GO:0009408;GO:0065007;GO:0043229;GO:0044237;GO:0070647;GO:0005575;GO:0044260;GO:0019222;GO:0050789;GO:0043412;GO:0043170;GO:0019538;GO:0031326;GO:…	K10295	-	3HTPA	S	sp|Q9XI00|SKI32_ARATH F-box protein 7 OS=Arabidopsis thaliana OX=3702 GN=SKIP32 PE=1 SV=1	CAA7047851.1 unnamed protein product [Microthlaspi erraticum]
TRINITY_DN102205_c0_g1	452	-	-	-	-	-	-	-
TRINITY_DN102207_c0_g1	357	-	-	-	-	-	-	-
TRINITY_DN102208_c0_g1	374	-	-	-	-	-	-	-
TRINITY_DN102209_c0_g1	317	-	-	-	-	-	-	XP_020170508.1 alpha-2-purothionin [Aegilops tauschii subsp. strangulata] &gt;KAF7075565.1 hypothetical protein CFC21_080330 [Triticum aestivum]
TRINITY_DN10220_c0_g1	2104	-	-	PF00646;PF07723	-	-	sp|Q8GW80|FBL65_ARATH F-box/LRR-repeat protein At3g59210 OS=Arabidopsis thaliana OX=3702 GN=At3g59210 PE=2 SV=1	CAB91591.1 putative protein [Arabidopsis thaliana]
TRINITY_DN102213_c0_g1	304	-	K11252	PF00125	34M19	B	sp|P07795|H2BL2_PSAMI Late histone H2B.2.2 OS=Psammechinus miliaris OX=7660 PE=3 SV=2	XP_002501781.1 histone H2B [Micromonas commoda] &gt;ACO63039.1 histone H2B [Micromonas commoda]
TRINITY_DN102221_c0_g1	310	GO:0006810;GO:0003674;GO:0008150;GO:0051179;GO:0022890;GO:0030001;GO:0051234;GO:0016020;GO:0015075;GO:0031224;GO:0005215;GO:1902600;GO:0015299;GO:0015672;GO:0098660;GO:0055085;GO:0022857;GO:0005575;GO:0015078;GO:0006813;GO:0044425;GO:0015077;GO:0098662;GO:0034220;GO:0016021;GO:0008324;GO:0015298;GO:0098655;GO:0022804;GO:0015318;GO:0015291;GO:0006812;GO:0006811;GO:0015297	-	-	3HPF5	P	-	-
TRINITY_DN102228_c0_g1	308	-	-	-	-	-	-	-
TRINITY_DN10222_c0_g1	380	GO:0043229;GO:0044237;GO:0090305;GO:0003676;GO:0005622;GO:0046872;GO:0003723;GO:0003824;GO:0044238;GO:0043167;GO:0071704;GO:0008150;GO:0090304;GO:0043226;GO:0006725;GO:0044444;GO:0043231;GO:0005739;GO:0046914;GO:0044464;GO:0046483;GO:0005623;GO:0005488;GO:1901360;GO:0004518;GO:0003674;GO:0016787;GO:0043227;GO:0016070;GO:0009987;GO:0044424;GO:0008152;GO:0043412;GO:0006139;GO:0016788;GO:0043170;GO:…	-	PF01535;PF13041	3HQPG	S	sp|Q9FMQ1|PP376_ARATH Pentatricopeptide repeat-containing protein At5g12100, mitochondrial OS=Arabidopsis thaliana OX=3702 GN=At5g12100 PE=2 SV=1	CAA2989026.1 Hypothetical predicted protein, partial [Olea europaea subsp. europaea]
TRINITY_DN102230_c0_g1	331	-	-	-	-	-	-	-
TRINITY_DN102231_c0_g1	872	-	-	-	-	-	-	-
TRINITY_DN102235_c0_g1	305	GO:0016020;GO:0043233;GO:0005730;GO:0003723;GO:0055044;GO:0044445;GO:0042788;GO:0044237;GO:0043229;GO:0071944;GO:0003735;GO:0022627;GO:0044464;GO:0005488;GO:0005623;GO:0043231;GO:0005198;GO:0031981;GO:0071704;GO:0043228;GO:0010467;GO:0022626;GO:0008152;GO:0006412;GO:0009987;GO:0044424;GO:0006807;GO:0005737;GO:1901363;GO:0015935;GO:0006518;GO:0034641;GO:1901566;GO:0044391;GO:0044267;GO:0044238;GO:…	K02981	-	3GC84	J	sp|Q8L8Y0|RS21_ARATH 40S ribosomal protein S2-1 OS=Arabidopsis thaliana OX=3702 GN=RPS2A PE=2 SV=2	QKY15256.1 40S ribosomal protein S2 (RPS2) [Polytomella parva]
TRINITY_DN102237_c0_g1	438	-	-	-	-	-	-	-
TRINITY_DN10223_c0_g1	1716	GO:1901363;GO:0044798;GO:0051171;GO:0006807;GO:0060255;GO:0009987;GO:0044424;GO:0007275;GO:0097659;GO:2000112;GO:0010262;GO:1901360;GO:0000003;GO:0043229;GO:0044237;GO:0065007;GO:0006351;GO:0003677;GO:0009058;GO:0019222;GO:0044260;GO:0006355;GO:0048510;GO:0034654;GO:1903506;GO:0048731;GO:0044249;GO:0043227;GO:0040034;GO:0051252;GO:0006725;GO:0043226;GO:0008150;GO:0032501;GO:0032774;GO:1901576;GO:…	K08064	PF02045	3HZ9N	K	sp|Q9LXV5|NFYA1_ARATH Nuclear transcription factor Y subunit A-1 OS=Arabidopsis thaliana OX=3702 GN=NFYA1 PE=2 SV=1	XP_006288441.1 nuclear transcription factor Y subunit A-1 isoform X1 [Capsella rubella] &gt;EOA21339.1 hypothetical protein CARUB_v10001701mg [Capsella rubella]
TRINITY_DN102241_c0_g1	488	-	-	-	-	-	-	-
TRINITY_DN102242_c0_g1	397	GO:0044237;GO:0043229;GO:0018193;GO:0043233;GO:0036211;GO:0071704;GO:0044464;GO:0005488;GO:0005623;GO:0043231;GO:0008152;GO:0008144;GO:0044424;GO:0009987;GO:0018208;GO:0005527;GO:0140096;GO:1901363;GO:0005783;GO:0016853;GO:0044432;GO:0005737;GO:0006807;GO:0006464;GO:0005622;GO:0012505;GO:0044267;GO:0006457;GO:0044238;GO:0044446;GO:0016859;GO:0003824;GO:0044422;GO:0044444;GO:0043226;GO:0000413;GO:…	-	-	3I04E	O	-	-
TRINITY_DN102244_c0_g1	306	-	K15455	-	3IJIA	S	sp|Q6C0G3|DPH3_YARLI Diphthamide biosynthesis protein 3 OS=Yarrowia lipolytica (strain CLIB 122 / E 150) OX=284591 GN=DPH3 PE=3 SV=1	XP_004965650.1 diphthamide biosynthesis protein 3 [Setaria italica] &gt;XP_034590841.1 diphthamide biosynthesis protein 3 [Setaria viridis] &gt;RCV22042.1 hypothetical protein SETIT_4G188400v2 [Setaria italica] &gt;TKW21966.1 hypothetical protein SEVIR_4G156600v2 [Setaria viridis]
TRINITY_DN102250_c0_g1	323	GO:0007275;GO:0040008;GO:0045927;GO:0044424;GO:0009987;GO:0048519;GO:0050896;GO:0010104;GO:0009968;GO:0005576;GO:0005737;GO:0048522;GO:0070297;GO:0043229;GO:0048518;GO:0048583;GO:1902531;GO:0009605;GO:0051716;GO:0065007;GO:0071496;GO:0031667;GO:0043231;GO:0006950;GO:0044464;GO:0005623;GO:0010648;GO:0032502;GO:0043227;GO:0010646;GO:0048585;GO:0010105;GO:0009267;GO:0048523;GO:0042594;GO:0005794;GO:…	-	-	3GGGS	S	sp|Q6IMT1|SAB_ARATH Protein SABRE OS=Arabidopsis thaliana OX=3702 GN=SAB PE=1 SV=1	KFK36439.1 hypothetical protein AALP_AA4G124600 [Arabis alpina]
TRINITY_DN102252_c0_g1	312	-	-	-	-	-	-	-
TRINITY_DN102254_c0_g1	307	-	-	-	-	-	-	-
TRINITY_DN10225_c0_g1	2442	GO:0003676;GO:0005488;GO:0097159;GO:0003674;GO:0003677;GO:1901363	-	PF03126;PF02201	3HS22	K	sp|Q9FT92|Y5843_ARATH Uncharacterized protein At5g08430 OS=Arabidopsis thaliana OX=3702 GN=At5g08430 PE=1 SV=2	CAA0401461.1 unnamed protein product [Arabidopsis thaliana]
TRINITY_DN102261_c0_g1	397	-	-	-	-	-	-	XP_006417330.1 uncharacterized protein LOC18993712 [Eutrema salsugineum] &gt;ESQ35683.1 hypothetical protein EUTSA_v10009573mg [Eutrema salsugineum]
TRINITY_DN102266_c0_g1	305	-	-	-	-	-	-	-
TRINITY_DN102267_c0_g1	322	GO:0016788;GO:0006139;GO:0043170;GO:0043412;GO:0044424;GO:0009987;GO:0008152;GO:0016787;GO:0043227;GO:0016070;GO:0006807;GO:0005575;GO:0034641;GO:1901363;GO:0097159;GO:0009451;GO:0004519;GO:0044238;GO:0003723;GO:0003824;GO:0005622;GO:0043229;GO:0044237;GO:0090305;GO:0003676;GO:1901360;GO:0004518;GO:0003674;GO:0043231;GO:0046483;GO:0044464;GO:0005488;GO:0005623;GO:0090304;GO:0006725;GO:0043226;GO:…	-	PF01535	3HWD0	S	sp|Q9SCT2|PP277_ARATH Pentatricopeptide repeat-containing protein At3g50420 OS=Arabidopsis thaliana OX=3702 GN=PCMP-E85 PE=2 SV=1	XP_010426588.2 PREDICTED: pentatricopeptide repeat-containing protein At3g50420-like [Camelina sativa]
TRINITY_DN102269_c0_g1	405	GO:0016491;GO:0034641;GO:0051188;GO:1901363;GO:0006807;GO:0005737;GO:0016620;GO:0016903;GO:0044424;GO:0009987;GO:0008152;GO:0055114;GO:0071704;GO:0050661;GO:0042440;GO:0015994;GO:0048037;GO:0043231;GO:0044464;GO:0005488;GO:0005623;GO:1901360;GO:0000166;GO:0140101;GO:0044237;GO:0043229;GO:0006782;GO:0019438;GO:0009058;GO:0046148;GO:0097159;GO:0033014;GO:0009536;GO:0036094;GO:0005575;GO:0043227;GO:…	-	-	3HT1N	H	-	-
TRINITY_DN10226_c0_g1	2065	-	-	-	3HXEG	K	-	XP_010486811.1 PREDICTED: uncharacterized protein LOC104764899 [Camelina sativa]
TRINITY_DN102270_c0_g1	327	-	-	-	-	-	-	-
TRINITY_DN102273_c0_g1	343	-	-	-	3HQF8	S	-	XP_006286109.1 uncharacterized protein LOC17878801 [Capsella rubella] &gt;EOA19007.1 hypothetical protein CARUB_v10007658mg [Capsella rubella]
TRINITY_DN102277_c0_g1	535	-	-	-	-	-	-	-
TRINITY_DN102279_c0_g1	421	GO:0016021;GO:0006793;GO:1901363;GO:0032553;GO:0006807;GO:0009987;GO:0008144;GO:0008152;GO:0006468;GO:0004672;GO:0016772;GO:0140096;GO:0097367;GO:0035639;GO:0071704;GO:0036211;GO:0000166;GO:0071944;GO:0044464;GO:0005488;GO:0006796;GO:0005623;GO:0016301;GO:0016740;GO:0044237;GO:0005524;GO:0043168;GO:0016020;GO:0097159;GO:0016310;GO:0044425;GO:0016773;GO:0044260;GO:0017076;GO:0036094;GO:0005575;GO:…	-	PF07714	3HMKY	T	sp|Q9FNE1|CRK42_ARATH Cysteine-rich receptor-like protein kinase 42 OS=Arabidopsis thaliana OX=3702 GN=CRK42 PE=2 SV=1	CAE6204014.1 unnamed protein product [Arabidopsis arenosa]
TRINITY_DN10227_c0_g1	4232	GO:0009506;GO:0005911;GO:1901265;GO:0005575;GO:0017076;GO:0036094;GO:0051187;GO:0042219;GO:0017168;GO:0097159;GO:0003824;GO:0030054;GO:0043167;GO:0044248;GO:0051186;GO:0016812;GO:0044273;GO:0005622;GO:0032559;GO:0032555;GO:0005829;GO:0003674;GO:0008150;GO:1901564;GO:0030554;GO:0044444;GO:0043603;GO:0043171;GO:0016787;GO:0008152;GO:0044424;GO:0008144;GO:0009987;GO:0006749;GO:0005737;GO:0006807;GO:…	K01469	PF02538;PF05378;PF19278;PF01968	3HSJF	E	sp|Q9FIZ7|OPLA_ARATH 5-oxoprolinase OS=Arabidopsis thaliana OX=3702 GN=OXP1 PE=1 SV=1	OAO95426.1 OXP1 [Arabidopsis thaliana]
TRINITY_DN102282_c0_g1	366	-	-	-	-	-	-	-
TRINITY_DN102288_c0_g1	366	-	K02947	-	34KHG	J	sp|O13614|RS10B_SCHPO 40S ribosomal protein S10-B OS=Schizosaccharomyces pombe (strain 972 / ATCC 24843) OX=284812 GN=rps1002 PE=3 SV=1	XP_023903068.1 40S ribosomal protein S10-A-like [Quercus suber]
TRINITY_DN10228_c0_g1	1291	GO:0043168;GO:0043229;GO:0044237;GO:0006886;GO:0042886;GO:0032561;GO:0036211;GO:0016192;GO:0071704;GO:0035639;GO:0032550;GO:0097367;GO:0005623;GO:0044464;GO:0005488;GO:0043231;GO:0000166;GO:0019001;GO:0046907;GO:0008152;GO:0015031;GO:0044424;GO:0009987;GO:0032549;GO:0033036;GO:1901363;GO:0008104;GO:0001882;GO:0051641;GO:0006807;GO:0005737;GO:0070727;GO:0032553;GO:0015833;GO:0006464;GO:0005622;GO:…	K07937	PF00025	3HVF7	U	sp|Q9LQC8|ARF2A_ARATH ADP-ribosylation factor 2-A OS=Arabidopsis thaliana OX=3702 GN=ARF2-A PE=2 SV=2	CAA2967783.1 ADP-ribosylation factor 2 [Olea europaea subsp. europaea]
TRINITY_DN10228_c0_g2	493	-	K07937	PF00025	37PTM	U	sp|P51823|ARF2_ORYSJ ADP-ribosylation factor 2 OS=Oryza sativa subsp. japonica OX=39947 GN=ARF PE=2 SV=2	OIV93727.1 hypothetical protein TanjilG_16578 [Lupinus angustifolius]
TRINITY_DN102294_c0_g1	365	-	-	-	-	-	-	-
TRINITY_DN102296_c0_g1	317	-	-	-	-	-	-	-
TRINITY_DN10229_c0_g1	1007	GO:0031966;GO:0009607;GO:0050801;GO:0044425;GO:0005575;GO:0006811;GO:0043227;GO:0044429;GO:0005886;GO:0051707;GO:0051234;GO:0044444;GO:0043226;GO:0008150;GO:0051179;GO:0003674;GO:0016723;GO:0006810;GO:0005739;GO:0046872;GO:0055076;GO:0015688;GO:0005622;GO:0031967;GO:0051704;GO:0065008;GO:0043167;GO:0031224;GO:0003824;GO:0044446;GO:0044422;GO:0055072;GO:0016021;GO:0016491;GO:0005737;GO:0008152;GO:…	-	-	3HR07	PQ	sp|F4I4K7|FRO3_ARATH Ferric reduction oxidase 3, mitochondrial OS=Arabidopsis thaliana OX=3702 GN=FRO3 PE=2 SV=1	XP_006418436.1 ferric reduction oxidase 3, mitochondrial [Eutrema salsugineum] &gt;ESQ36789.1 hypothetical protein EUTSA_v10006972mg [Eutrema salsugineum]
TRINITY_DN1022_c0_g1	1592	GO:0009561;GO:0006364;GO:0003723;GO:0043229;GO:0044237;GO:0000462;GO:0044464;GO:0005623;GO:0005488;GO:0042254;GO:0043231;GO:0003735;GO:0032502;GO:1901360;GO:0071704;GO:0005198;GO:0044085;GO:0090304;GO:0010467;GO:0042274;GO:0006396;GO:0006139;GO:0043228;GO:0007275;GO:0016070;GO:0008152;GO:0006412;GO:0030154;GO:0044424;GO:0009987;GO:0009553;GO:0006807;GO:0005737;GO:0048869;GO:1901363;GO:0015935;GO:…	K02996	PF00380	3HRUH	J	sp|Q8L6Z4|RPS9M_ARATH 30S ribosomal protein S9, mitochondrial OS=Arabidopsis thaliana OX=3702 GN=RPS9M PE=1 SV=1	XP_002877645.1 uncharacterized protein LOC9313713 [Arabidopsis lyrata subsp. lyrata] &gt;EFH53904.1 ribosomal protein S9 family protein [Arabidopsis lyrata subsp. lyrata]
TRINITY_DN102301_c0_g1	550	-	K00281	-	34H2P	E	sp|O49954|GCSP_SOLTU Glycine dehydrogenase (decarboxylating), mitochondrial OS=Solanum tuberosum OX=4113 GN=GDCSP PE=2 SV=1	KAF6260213.1 glycine cleavage system P-protein-domain-containing protein [Scenedesmus sp. NREL 46B-D3]
TRINITY_DN102304_c0_g1	346	-	-	-	-	-	-	-
TRINITY_DN102305_c0_g1	382	-	-	-	-	-	-	-
TRINITY_DN102306_c0_g1	521	-	-	-	2QQ7T	S	sp|F4JNA9|RPP4_ARATH Disease resistance protein RPP4 OS=Arabidopsis thaliana OX=3702 GN=RPP4 PE=1 SV=1	AXU93659.1 RPP4/RPP5-like protein [Arabidopsis thaliana]
TRINITY_DN102307_c0_g1	511	-	-	-	-	-	sp|Q9LR97|Y1239_ARATH UPF0725 protein At1g23950 OS=Arabidopsis thaliana OX=3702 GN=At1g23950 PE=1 SV=1	XP_018438331.1 PREDICTED: UPF0725 protein At1g23950-like [Raphanus sativus]
TRINITY_DN102309_c0_g1	352	-	-	-	34MN5	L	-	KAF6262566.1 DNA-binding pseudobarrel-protein domain-containing protein-containing protein [Scenedesmus sp. NREL 46B-D3]
TRINITY_DN10230_c0_g1	5923	GO:0009719;GO:0016020;GO:0055044;GO:0043229;GO:0071944;GO:0032502;GO:0007049;GO:0044464;GO:0005623;GO:0099080;GO:0009524;GO:0090696;GO:0005856;GO:0055028;GO:0009653;GO:0010101;GO:0050896;GO:0015630;GO:0043228;GO:0090697;GO:0099568;GO:0044424;GO:0009987;GO:0042221;GO:0009725;GO:0099081;GO:0007275;GO:0099512;GO:0048364;GO:0005874;GO:0009574;GO:0005737;GO:0009733;GO:0048528;GO:0044448;GO:0044430;GO:…	-	PF12799	3HNDM	T	sp|F4IIU4|AIR9_ARATH 187-kDa microtubule-associated protein AIR9 OS=Arabidopsis thaliana OX=3702 GN=AIR9 PE=1 SV=1	NP_001324697.1 Outer arm dynein light chain 1 protein [Arabidopsis thaliana] &gt;ANM62548.1 Outer arm dynein light chain 1 protein [Arabidopsis thaliana]
TRINITY_DN102310_c0_g1	429	-	-	-	-	-	-	-
TRINITY_DN102315_c0_g1	307	-	-	-	-	-	-	-
TRINITY_DN102316_c0_g1	378	-	-	PF08238	-	-	-	-
TRINITY_DN102325_c0_g1	414	-	-	-	-	-	-	-
TRINITY_DN102328_c0_g1	422	-	-	-	-	-	-	-
TRINITY_DN10232_c0_g1	2556	GO:0003824;GO:0044238;GO:0042493;GO:0043167;GO:0004467;GO:0032559;GO:0005622;GO:0032555;GO:0043436;GO:0009628;GO:0003674;GO:0030554;GO:0008150;GO:0031956;GO:0043226;GO:0044444;GO:0016878;GO:0019752;GO:1901265;GO:0015645;GO:0043227;GO:0010193;GO:0005777;GO:0017076;GO:0036094;GO:0006979;GO:0005575;GO:0006082;GO:0102391;GO:1901700;GO:0097159;GO:0044237;GO:0043229;GO:0006629;GO:0005524;GO:0043168;GO:…	K01897	PF00501	3HSNX	I	sp|Q8LKS5|LACS7_ARATH Long chain acyl-CoA synthetase 7, peroxisomal OS=Arabidopsis thaliana OX=3702 GN=LACS7 PE=1 SV=2	XP_010421596.1 PREDICTED: long chain acyl-CoA synthetase 7, peroxisomal-like [Camelina sativa]
TRINITY_DN102330_c0_g1	325	-	-	-	-	-	-	-
TRINITY_DN102338_c0_g1	496	-	-	PF03364	3HQ73	S	-	GBG89091.1 hypothetical protein CBR_g48801 [Chara braunii]
TRINITY_DN10233_c0_g1	802	GO:0031975;GO:0031090;GO:0044429;GO:0005743;GO:0043227;GO:0044424;GO:0005737;GO:0022857;GO:0005575;GO:0044425;GO:0016021;GO:0031966;GO:0044422;GO:0019866;GO:0044446;GO:0005740;GO:0016020;GO:0031224;GO:0043229;GO:0031967;GO:0005215;GO:0005622;GO:0055085;GO:0005739;GO:0043231;GO:0044464;GO:0005623;GO:0006810;GO:0003674;GO:0051179;GO:0008150;GO:0043226;GO:0051234;GO:0044444	K05863	PF00153	34JWP	C	sp|P31692|ADT_PARKE ADP,ATP carrier protein OS=Parachlorella kessleri OX=3074 PE=3 SV=1	PRW39128.1 ADP,ATP carrier [Chlorella sorokiniana]
TRINITY_DN10233_c1_g1	431	GO:0031975;GO:0044429;GO:0031090;GO:0005743;GO:0043227;GO:0044424;GO:0005575;GO:0022857;GO:0005737;GO:0044425;GO:0031966;GO:0016021;GO:0019866;GO:0005740;GO:0044446;GO:0044422;GO:0016020;GO:0031224;GO:0005215;GO:0031967;GO:0043229;GO:0055085;GO:0005622;GO:0044464;GO:0005623;GO:0006810;GO:0043231;GO:0005739;GO:0003674;GO:0051179;GO:0008150;GO:0051234;GO:0044444;GO:0043226	K05863	-	34JWP	C	sp|P27080|ADT_CHLRE ADP,ATP carrier protein OS=Chlamydomonas reinhardtii OX=3055 GN=ABT PE=2 SV=1	KAG6556488.1 hypothetical protein Mapa_001814 [Marchantia paleacea]
TRINITY_DN102342_c0_g1	415	GO:0052826;GO:0005783;GO:0006793;GO:0052745;GO:0004446;GO:0005575;GO:0031974;GO:0034416;GO:0005737;GO:0044432;GO:0008152;GO:0009987;GO:0044424;GO:0005788;GO:0016787;GO:0043227;GO:0016788;GO:0070013;GO:0042578;GO:0044444;GO:0043226;GO:0008150;GO:0003674;GO:0044464;GO:0006796;GO:0005623;GO:0043231;GO:0005622;GO:0044237;GO:0043229;GO:0012505;GO:0034417;GO:0003824;GO:0044446;GO:0043233;GO:0016311;GO:…	K03103	-	3HP9N	S	sp|Q54ND5|MINP1_DICDI Multiple inositol polyphosphate phosphatase 1 OS=Dictyostelium discoideum OX=44689 GN=mipp1 PE=1 SV=1	KAG6527202.1 hypothetical protein ZIOFF_009297 [Zingiber officinale]
TRINITY_DN102348_c0_g1	833	GO:0005622;GO:0048856;GO:0046872;GO:0071363;GO:0012505;GO:0051649;GO:0032501;GO:0043226;GO:0031253;GO:0051049;GO:0010831;GO:0034613;GO:0044433;GO:0005886;GO:0071840;GO:0044459;GO:0070848;GO:0051259;GO:0044441;GO:0071702;GO:0043229;GO:0055044;GO:0006996;GO:0006886;GO:0020018;GO:0043933;GO:0060341;GO:0000166;GO:0120036;GO:0016787;GO:0007275;GO:0046907;GO:0007399;GO:0045595;GO:0033036;GO:0032549;GO:…	K12483	PF16880;PF00350	3HND9	TU	sp|Q86TD4|SRCA_HUMAN Sarcalumenin OS=Homo sapiens OX=9606 GN=SRL PE=1 SV=3	PSC74976.1 EH domain-containing 1-like [Micractinium conductrix]
TRINITY_DN102349_c0_g1	392	GO:1901362;GO:0009108;GO:0043604;GO:1901265;GO:0005575;GO:0009117;GO:0036094;GO:0097159;GO:0019438;GO:0043167;GO:1901566;GO:0032991;GO:0072522;GO:0032559;GO:1901137;GO:0003674;GO:0046483;GO:0005829;GO:0043603;GO:0016829;GO:0044271;GO:0018130;GO:0006753;GO:0043169;GO:0006139;GO:0009346;GO:0006164;GO:0008152;GO:0009259;GO:0033865;GO:0008144;GO:0034030;GO:0005737;GO:0034641;GO:0016020;GO:0019637;GO:…	K01648	PF00285	3G8F2	C	sp|Q8X097|ACL1_NEUCR Probable ATP-citrate synthase subunit 1 OS=Neurospora crassa (strain ATCC 24698 / 74-OR23-1A / CBS 708.71 / DSM 1257 / FGSC 987) OX=367110 GN=B14D6.310 PE=3 SV=1	XP_023883009.1 probable ATP-citrate synthase subunit 1 [Quercus suber]
TRINITY_DN10234_c0_g1	1257	GO:0004725;GO:0044260;GO:0005737;GO:0006807;GO:0005575;GO:0006793;GO:0035335;GO:0016788;GO:0043170;GO:0019538;GO:0043412;GO:0140096;GO:0042578;GO:0044424;GO:0009987;GO:0008152;GO:0016787;GO:0043227;GO:0003674;GO:0005634;GO:0043231;GO:0006796;GO:0044464;GO:0005623;GO:0043226;GO:0071704;GO:1901564;GO:0036211;GO:0008150;GO:0044238;GO:0006470;GO:0044267;GO:0016311;GO:0016791;GO:0003824;GO:0004721;GO:…	K18045	PF03162	3HXJR	V	sp|Q681Z2|DSP3_ARATH Tyrosine-protein phosphatase DSP3 OS=Arabidopsis thaliana OX=3702 GN=DSP3 PE=1 SV=1	NP_186929.2 Tyrosine phosphatase family protein [Arabidopsis thaliana] &gt;Q681Z2.1 RecName: Full=Tyrosine-protein phosphatase DSP3; AltName: Full=Protein PLANT AND FUNGI ATYPICAL DUAL-SPECIFICITY PHOSPHATASE 3; Short=AtPFA-DSP3 [Arabidopsis thaliana] &gt;AEE73861.1 Tyrosine phosphatase family protein [Arabidopsis thaliana] &gt;BAD43238.1 unknown protein [Arabidopsis thaliana]
TRINITY_DN102353_c0_g1	400	-	-	-	-	-	-	-
TRINITY_DN102354_c0_g1	307	-	-	-	-	-	-	-
TRINITY_DN102355_c0_g1	319	-	-	-	-	-	-	-
TRINITY_DN102361_c0_g1	371	GO:0055114;GO:0044424;GO:0009987;GO:0043621;GO:0008442;GO:0008152;GO:0005737;GO:0006807;GO:1901606;GO:1901363;GO:0016491;GO:0009056;GO:0016616;GO:0016054;GO:1901565;GO:0043229;GO:0044237;GO:0009063;GO:0000166;GO:0044281;GO:0043231;GO:0005488;GO:0044464;GO:0005623;GO:0016614;GO:1901575;GO:0048037;GO:0071704;GO:0046395;GO:0019752;GO:0051287;GO:0005515;GO:1901265;GO:0043227;GO:0006573;GO:0036094;GO:…	-	-	3IAZS	I	-	XP_023899720.1 probable 3-hydroxyisobutyrate dehydrogenase, mitochondrial [Quercus suber]
TRINITY_DN102362_c0_g1	369	-	K02923	PF01781	3M1AF	J	sp|Q09JT4|RL38_ARGMO 60S ribosomal protein L38 OS=Argas monolakensis OX=34602 GN=RpL38 PE=3 SV=1	KAF5837181.1 60S ribosomal protein L38 [Dunaliella salina]
TRINITY_DN102366_c0_g1	388	-	-	-	-	-	-	-
TRINITY_DN102369_c0_g1	416	-	-	-	-	-	-	-
TRINITY_DN10236_c0_g1	877	-	-	-	3HZ7S	O	-	-
TRINITY_DN102370_c0_g1	349	-	K15292	PF00995	34GY5	U	sp|Q15833|STXB2_HUMAN Syntaxin-binding protein 2 OS=Homo sapiens OX=9606 GN=STXBP2 PE=1 SV=2	KAA6419876.1 SM Sec1-family [Trebouxia sp. A1-2]
TRINITY_DN102371_c0_g1	325	-	-	-	-	-	-	-
TRINITY_DN102372_c0_g1	360	-	-	-	-	-	-	-
TRINITY_DN102373_c0_g1	314	-	-	-	-	-	-	-
TRINITY_DN102374_c0_g1	501	-	-	PF04089	-	-	sp|O89051|ITM2B_MOUSE Integral membrane protein 2B OS=Mus musculus OX=10090 GN=Itm2b PE=1 SV=1	-
TRINITY_DN10237_c0_g1	1235	-	-	-	-	-	-	XP_010426138.1 PREDICTED: uncharacterized protein LOC104711155 [Camelina sativa]
TRINITY_DN102381_c0_g1	358	-	-	PF07714	KOG0197	KLT	sp|P13406|FYN_XENLA Tyrosine-protein kinase Fyn OS=Xenopus laevis OX=8355 GN=fyn PE=2 SV=3	KAF8066374.1 fyna [Scenedesmus sp. PABB004]
TRINITY_DN102385_c0_g1	323	-	-	-	-	-	-	-
TRINITY_DN102386_c0_g1	618	GO:0008150;GO:0009825;GO:0009987;GO:0016049;GO:0040007	-	-	KOG2667	D	sp|Q56YT7|VUP3_ARATH Vascular-related unknown protein 3 OS=Arabidopsis thaliana OX=3702 GN=VUP3 PE=2 SV=1	KAF3527748.1 hypothetical protein DY000_02042241 [Brassica cretica]
TRINITY_DN102388_c0_g1	353	-	-	-	-	-	-	-
TRINITY_DN10238_c0_g1	1255	-	-	-	-	-	-	CAE5966049.1 unnamed protein product [Arabidopsis arenosa]
TRINITY_DN102391_c0_g1	467	-	-	-	-	-	-	-
TRINITY_DN10239_c0_g1	1548	-	-	PF01582	-	-	sp|Q9FHE9|P2A08_ARATH Protein PHLOEM PROTEIN 2-LIKE A8 OS=Arabidopsis thaliana OX=3702 GN=PP2A8 PE=2 SV=1	CAE6180766.1 unnamed protein product [Arabidopsis arenosa]
TRINITY_DN1023_c0_g1	1958	GO:0043229;GO:0005622;GO:0044446;GO:0044422;GO:0012505;GO:0005789;GO:0031224;GO:0016020;GO:0044444;GO:0043226;GO:0044464;GO:0005623;GO:0043231;GO:0043227;GO:0044424;GO:0042175;GO:0031984;GO:0098827;GO:0044425;GO:0016021;GO:0005783;GO:0005575;GO:0005737;GO:0044432	K03301	-	3HMFH	P	-	EOA20460.1 hypothetical protein CARUB_v10000772mg [Capsella rubella]
TRINITY_DN102401_c0_g1	329	-	-	-	-	-	-	-
TRINITY_DN102403_c0_g1	308	-	K10390	-	34JI8	Z	sp|Q9R1K7|TBD_MOUSE Tubulin delta chain OS=Mus musculus OX=10090 GN=Tubd1 PE=1 SV=1	KAF6251727.1 delta tubulin, partial [Scenedesmus sp. NREL 46B-D3]
TRINITY_DN102408_c0_g1	422	-	-	-	-	-	-	-
TRINITY_DN10240_c0_g1	578	-	-	-	-	-	-	-
TRINITY_DN102411_c0_g1	451	-	-	-	-	-	-	-
TRINITY_DN102413_c0_g1	417	-	-	PF12609	-	-	-	CAA0361068.1 unnamed protein product [Arabidopsis thaliana]
TRINITY_DN102417_c0_g1	310	GO:0001228;GO:0045935;GO:0051173;GO:0031325;GO:0097659;GO:0009987;GO:0044424;GO:0001067;GO:0006807;GO:0060255;GO:0051171;GO:0048522;GO:1901363;GO:0000977;GO:0065007;GO:0006351;GO:0000976;GO:0043229;GO:0044237;GO:1901360;GO:1903508;GO:2000112;GO:0010604;GO:0010628;GO:0001012;GO:1903506;GO:0043227;GO:0044249;GO:0006355;GO:0044260;GO:0045944;GO:0034654;GO:0009058;GO:0003677;GO:0000981;GO:0019222;GO:…	-	-	3HP0P	K	-	-
TRINITY_DN102418_c0_g1	349	-	-	PF00505	-	-	sp|Q6AZF8|HM20A_XENLA High mobility group protein 20A OS=Xenopus laevis OX=8355 GN=hmg20a PE=2 SV=1	-
TRINITY_DN102419_c0_g1	343	GO:0008152;GO:0055114;GO:0043169;GO:0044425;GO:0016491;GO:1901363;GO:0097159;GO:0016021;GO:0009058;GO:0005575;GO:0044550;GO:0005506;GO:0004497;GO:0020037;GO:0046872;GO:0016709;GO:0003824;GO:0019748;GO:0043167;GO:0016020;GO:0031224;GO:0008150;GO:0046906;GO:0048037;GO:0005488;GO:0016705;GO:0046914;GO:0003674	-	-	3HVWH	Q	sp|O64635|C76C4_ARATH Cytochrome P450 76C4 OS=Arabidopsis thaliana OX=3702 GN=CYP76C4 PE=3 SV=1	KAF8088279.1 hypothetical protein N665_0546s0011 [Sinapis alba]
TRINITY_DN10241_c0_g1	6041	GO:0005634;GO:0006810;GO:0008150;GO:0051179;GO:0043226;GO:0044444;GO:0051234;GO:0044422;GO:0032991;GO:0044446;GO:0051236;GO:0031224;GO:0012505;GO:0044428;GO:0031967;GO:0015931;GO:0005622;GO:0071705;GO:0005575;GO:0071702;GO:0044425;GO:0050658;GO:0005643;GO:0043227;GO:0045184;GO:0043231;GO:0005623;GO:0044464;GO:0042886;GO:0005635;GO:0016020;GO:0043229;GO:0050657;GO:0005737;GO:0015833;GO:0051028;GO:…	K14314	-	3HRM3	UY	sp|F4KHD8|GP210_ARATH Nuclear pore complex protein GP210 OS=Arabidopsis thaliana OX=3702 GN=GB210 PE=1 SV=1	XP_020874699.1 nuclear pore complex protein GP210 [Arabidopsis lyrata subsp. lyrata]
TRINITY_DN102422_c0_g1	344	GO:0097159;GO:1901700;GO:0036094;GO:0005575;GO:0010033;GO:1901265;GO:0050789;GO:0043170;GO:0019538;GO:0007154;GO:0005634;GO:0071495;GO:0003674;GO:0050794;GO:0032559;GO:0043167;GO:0004674;GO:1901701;GO:0044267;GO:0097305;GO:0005737;GO:0071229;GO:0006468;GO:0007165;GO:0009725;GO:0042221;GO:0008144;GO:0008152;GO:0070887;GO:0005509;GO:0005516;GO:0016772;GO:0043169;GO:0071704;GO:0071215;GO:0036211;GO:…	-	PF13499	3GB1K	T	-	-
TRINITY_DN102426_c0_g1	598	-	-	-	-	-	-	-
TRINITY_DN10242_c0_g1	1228	-	-	-	3I000	T	sp|Q9AST6|VSP55_ARATH Vacuolar protein sorting-associated protein 55 homolog OS=Arabidopsis thaliana OX=3702 GN=At1g32410 PE=2 SV=1	CAE5966889.1 unnamed protein product [Arabidopsis arenosa]
TRINITY_DN102430_c0_g1	335	-	-	-	-	-	-	-
TRINITY_DN102431_c0_g1	330	-	-	-	-	-	-	-
TRINITY_DN102432_c0_g1	355	-	-	-	-	-	-	-
TRINITY_DN102434_c0_g1	784	-	K02934	PF01159	3M2TB	J	sp|Q9C9C6|RL62_ARATH 60S ribosomal protein L6-2 OS=Arabidopsis thaliana OX=3702 GN=RPL6B PE=2 SV=1	XP_020598885.1 60S ribosomal protein L6-3-like [Phalaenopsis equestris]
TRINITY_DN102437_c0_g1	409	-	K00972	-	34GXK	M	sp|Q16222|UAP1_HUMAN UDP-N-acetylhexosamine pyrophosphorylase OS=Homo sapiens OX=9606 GN=UAP1 PE=1 SV=3	PNW81173.1 hypothetical protein CHLRE_07g345300v5 [Chlamydomonas reinhardtii]
TRINITY_DN102438_c0_g1	377	GO:0006793;GO:0009058;GO:0046351;GO:0034637;GO:0008152;GO:0009987;GO:0044249;GO:0016787;GO:0004805;GO:0016788;GO:0042578;GO:0016051;GO:0005992;GO:0008150;GO:0071704;GO:0009311;GO:0003674;GO:0009312;GO:1901576;GO:0005984;GO:0006796;GO:0005991;GO:0005975;GO:0044237;GO:0019203;GO:0044238;GO:0003824;GO:0044262;GO:0016311;GO:0016791	K01087	PF02358	3GB9D	G	sp|Q75WV3|TPP1_ORYSJ Probable trehalose-phosphate phosphatase 1 OS=Oryza sativa subsp. japonica OX=39947 GN=TPP1 PE=1 SV=1	ONI25053.1 hypothetical protein PRUPE_2G277800 [Prunus persica]
TRINITY_DN10243_c0_g1	2759	GO:0043233;GO:0005730;GO:2000241;GO:0065007;GO:0000003;GO:0043229;GO:0033043;GO:0044464;GO:0005623;GO:0043231;GO:0010564;GO:0007049;GO:0031981;GO:0005694;GO:0043228;GO:0009987;GO:0044424;GO:0051726;GO:0040020;GO:0033044;GO:0022414;GO:0051321;GO:0090173;GO:0044446;GO:0044422;GO:0050794;GO:0044428;GO:0005622;GO:0005634;GO:0051128;GO:0008150;GO:0043232;GO:0043226;GO:0050789;GO:0051983;GO:0044087;GO:…	-	PF20435	3HTRZ	S	sp|Q0WR66|ASY3_ARATH Meiosis-specific protein ASY3 OS=Arabidopsis thaliana OX=3702 GN=ASY3 PE=1 SV=1	QFG39520.1 asynaptic protein 3, partial [Arabidopsis lyrata subsp. petraea]
TRINITY_DN10243_c0_g2	385	GO:0044424;GO:0009987;GO:0005694;GO:0043228;GO:0022414;GO:0033044;GO:0051321;GO:0040020;GO:0051726;GO:0000003;GO:0043229;GO:0033043;GO:0043233;GO:2000241;GO:0005730;GO:0065007;GO:0031981;GO:0044464;GO:0005623;GO:0043231;GO:0010564;GO:0007049;GO:0043227;GO:0050789;GO:0051983;GO:0044087;GO:0060631;GO:0070013;GO:0051783;GO:0060629;GO:0005575;GO:0031974;GO:0051445;GO:0050794;GO:0044428;GO:0005622;GO:…	-	-	3HTRZ	S	sp|Q0WR66|ASY3_ARATH Meiosis-specific protein ASY3 OS=Arabidopsis thaliana OX=3702 GN=ASY3 PE=1 SV=1	QFG39521.1 asynaptic protein 3 [Arabidopsis lyrata subsp. petraea]
TRINITY_DN102449_c0_g1	344	-	-	-	-	-	-	-
TRINITY_DN10244_c0_g1	3100	GO:0090304;GO:0071704;GO:0061458;GO:0032502;GO:0140101;GO:0043231;GO:0044464;GO:0005623;GO:0005488;GO:0043168;GO:0005524;GO:0006419;GO:0016020;GO:0043039;GO:0009532;GO:0006518;GO:0034641;GO:0022414;GO:0009451;GO:0003006;GO:0005737;GO:0008144;GO:0008152;GO:0006412;GO:0016070;GO:0043038;GO:0006139;GO:0006418;GO:0048316;GO:0043169;GO:0010467;GO:0044271;GO:0043603;GO:0009791;GO:0003674;GO:0043436;GO:…	K01872	PF01411;PF02272;PF07973	3HP84	J	sp|Q9FFC7|SYAP_ARATH Alanine--tRNA ligase, chloroplastic/mitochondrial OS=Arabidopsis thaliana OX=3702 GN=EMB86 PE=1 SV=2	XP_010425387.1 PREDICTED: alanine--tRNA ligase, chloroplastic/mitochondrial-like isoform X2 [Camelina sativa]
TRINITY_DN102453_c0_g1	496	-	-	-	-	-	-	-
TRINITY_DN102458_c0_g1	588	-	-	-	-	-	-	-
TRINITY_DN10245_c0_g1	329	GO:0051649;GO:0070201;GO:0008150;GO:0043226;GO:0044444;GO:0051234;GO:0090316;GO:0051050;GO:0006901;GO:0010256;GO:1903829;GO:0005622;GO:0012505;GO:0005789;GO:0006903;GO:0044425;GO:0019222;GO:0006888;GO:0044431;GO:0090087;GO:0070861;GO:0048207;GO:0071702;GO:0051648;GO:0022607;GO:0043227;GO:0051049;GO:0006900;GO:0045184;GO:0090114;GO:0005794;GO:0010628;GO:0070863;GO:0071840;GO:0010604;GO:0051650;GO:…	K20353	PF12932	3HS6S	U	sp|Q9FGK9|MAG5_ARATH Protein transport protein SEC16A homolog OS=Arabidopsis thaliana OX=3702 GN=MAG5 PE=1 SV=1	XP_002865115.1 protein transport protein SEC16A homolog isoform X1 [Arabidopsis lyrata subsp. lyrata] &gt;EFH41374.1 hypothetical protein ARALYDRAFT_494224 [Arabidopsis lyrata subsp. lyrata]
TRINITY_DN102461_c0_g1	304	-	-	-	-	-	-	-
TRINITY_DN102463_c0_g1	376	-	-	-	-	-	-	-
TRINITY_DN102465_c0_g1	386	-	-	-	-	-	-	-
TRINITY_DN102469_c0_g1	421	-	K02983	-	34IM5	J	sp|P0CT62|RS30A_SCHPO 40S ribosomal protein S30-A OS=Schizosaccharomyces pombe (strain 972 / ATCC 24843) OX=284812 GN=rps3001 PE=3 SV=1	PSC72849.1 40S ribosomal S30 [Micractinium conductrix]
TRINITY_DN102471_c0_g1	307	GO:0080090;GO:0003674;GO:0005829;GO:0030234;GO:0050790;GO:0044444;GO:1901564;GO:0008150;GO:0006470;GO:0044238;GO:0031323;GO:0044267;GO:0051246;GO:1903293;GO:0032991;GO:0016311;GO:1902494;GO:0005622;GO:0006464;GO:0070262;GO:0050794;GO:0044260;GO:0010921;GO:0051336;GO:0005575;GO:0019222;GO:0043170;GO:0065009;GO:0019538;GO:0098772;GO:0019888;GO:0050789;GO:0000159;GO:0043412;GO:0000278;GO:0007049;GO:…	K04354	-	3GC63	T	sp|Q38821|2ABA_ARATH Serine/threonine protein phosphatase 2A 55 kDa regulatory subunit B alpha isoform OS=Arabidopsis thaliana OX=3702 GN=PP2AB1 PE=1 SV=2	XP_010462005.1 PREDICTED: serine/threonine protein phosphatase 2A 55 kDa regulatory subunit B alpha isoform isoform X1 [Camelina sativa]
TRINITY_DN102475_c0_g1	438	GO:0050789;GO:0022603;GO:0009536;GO:0005575;GO:0005618;GO:0050793;GO:0003729;GO:0097159;GO:0032991;GO:0044422;GO:0044446;GO:0030312;GO:0005829;GO:0003674;GO:0016043;GO:0022626;GO:0042274;GO:0005737;GO:1905428;GO:0022613;GO:0015935;GO:0042592;GO:0016020;GO:0048878;GO:0042788;GO:0009888;GO:0043231;GO:0005623;GO:0044464;GO:0005488;GO:0071826;GO:0032502;GO:0022627;GO:0048507;GO:0071944;GO:0051239;GO:…	K02947	PF03501	3I99X	J	sp|P0DKK8|RS10A_ORYSJ 40S ribosomal protein S10-1 OS=Oryza sativa subsp. japonica OX=39947 GN=RPS10-1 PE=2 SV=1	CAD6260938.1 unnamed protein product [Miscanthus lutarioriparius]
TRINITY_DN102476_c0_g1	326	-	-	-	-	-	-	-
TRINITY_DN102478_c0_g1	376	-	K09966	-	34IX5	S	-	GBG00080.1 hypothetical protein Rsub_12777 [Raphidocelis subcapitata]
TRINITY_DN10247_c0_g1	421	GO:0006396;GO:0043228;GO:0008186;GO:0006139;GO:0010467;GO:0008152;GO:0008026;GO:0008144;GO:0044424;GO:0009987;GO:0016070;GO:0016787;GO:0032553;GO:0003724;GO:0005737;GO:0006807;GO:1901363;GO:0034641;GO:0022613;GO:0017111;GO:0004004;GO:0006364;GO:0043233;GO:0003723;GO:0005730;GO:0016817;GO:0005524;GO:0043168;GO:0043229;GO:0044237;GO:0000166;GO:1901360;GO:0005488;GO:0044464;GO:0005623;GO:0043231;GO:…	K14777	-	3HY5U	A	sp|Q8GY84|RH10_ARATH DEAD-box ATP-dependent RNA helicase 10 OS=Arabidopsis thaliana OX=3702 GN=RH10 PE=1 SV=2	CDY42845.1 BnaAnng06700D [Brassica napus]
TRINITY_DN102480_c0_g1	317	GO:0006807;GO:0005737;GO:1901363;GO:0034641;GO:0006518;GO:0043228;GO:0010467;GO:0022626;GO:0008152;GO:0006412;GO:0044424;GO:0002181;GO:0009987;GO:0003735;GO:0044464;GO:0005488;GO:0005623;GO:0005198;GO:0071704;GO:0003723;GO:0044445;GO:0044237;GO:0043229;GO:1990904;GO:0044260;GO:0005840;GO:0005575;GO:0043043;GO:0097159;GO:0009058;GO:0019538;GO:0043170;GO:0043604;GO:0044249;GO:0015934;GO:0022625;GO:…	K02908	-	3GIJ8	J	sp|P52808|RL30A_SCHPO 60S ribosomal protein L30-1 OS=Schizosaccharomyces pombe (strain 972 / ATCC 24843) OX=284812 GN=rpl3001 PE=3 SV=2	KAF7846131.1 hypothetical protein BT93_L5186 [Corymbia citriodora subsp. variegata]
TRINITY_DN102481_c0_g1	321	GO:0032388;GO:0071705;GO:0044446;GO:0051222;GO:0098588;GO:0044422;GO:1904951;GO:0016043;GO:0051179;GO:0006810;GO:0016559;GO:0032879;GO:0010468;GO:0048199;GO:0042175;GO:0051656;GO:0050789;GO:0061024;GO:0007031;GO:0098827;GO:0032880;GO:0005575;GO:0000139;GO:0048285;GO:0048518;GO:0051640;GO:0016020;GO:0042886;GO:0065003;GO:0044085;GO:0016192;GO:0044464;GO:0005623;GO:0043231;GO:0015031;GO:0005783;GO:…	-	-	3HS6S	U	-	-
TRINITY_DN102487_c0_g1	450	-	K02937	PF08079;PF00327	34GVX	J	sp|Q9LHP1|RL74_ARATH 60S ribosomal protein L7-4 OS=Arabidopsis thaliana OX=3702 GN=RPL7D PE=2 SV=1	XP_005643653.1 60S ribosomal protein L7 [Coccomyxa subellipsoidea C-169] &gt;EIE19109.1 60S ribosomal protein L7 [Coccomyxa subellipsoidea C-169]
TRINITY_DN10248_c0_g1	1477	GO:1901363;GO:0017111;GO:0016021;GO:0022857;GO:0032553;GO:0016787;GO:0008144;GO:0035639;GO:0097367;GO:0005623;GO:0044464;GO:0005488;GO:0071944;GO:0000166;GO:0005524;GO:0005215;GO:0043168;GO:0016817;GO:0016020;GO:0044425;GO:0097159;GO:0015399;GO:0042623;GO:0005575;GO:0036094;GO:0017076;GO:1901265;GO:0005886;GO:0022804;GO:0051179;GO:0008150;GO:0030554;GO:0016887;GO:0051234;GO:0042626;GO:0006810;GO:…	-	PF19055;PF01061	3HWM8	Q	sp|Q7PC82|AB42G_ARATH ABC transporter G family member 42 OS=Arabidopsis thaliana OX=3702 GN=ABCG42 PE=2 SV=1	CAE6194902.1 unnamed protein product [Arabidopsis arenosa]
TRINITY_DN10248_c0_g2	3049	GO:0032555;GO:0006810;GO:0043492;GO:0003674;GO:0030554;GO:0016887;GO:0008150;GO:0051179;GO:0042626;GO:0051234;GO:0016818;GO:0003824;GO:0031224;GO:0043167;GO:0015405;GO:0032559;GO:0016462;GO:0055085;GO:0017076;GO:0036094;GO:0042623;GO:0005575;GO:0044425;GO:0015399;GO:0097159;GO:0005886;GO:0022804;GO:1901265;GO:0005623;GO:0005488;GO:0044464;GO:0000166;GO:0071944;GO:0035639;GO:0097367;GO:0016020;GO:…	-	PF08370;PF00005;PF01061	3HWM8	Q	sp|Q7PC81|AB43G_ARATH ABC transporter G family member 43 OS=Arabidopsis thaliana OX=3702 GN=ABCG43 PE=2 SV=2	XP_023634094.1 ABC transporter G family member 42 isoform X1 [Capsella rubella]
TRINITY_DN10248_c0_g3	3339	GO:0043167;GO:0031224;GO:0042493;GO:0015893;GO:0008643;GO:0003824;GO:0016818;GO:0055085;GO:0032559;GO:0016462;GO:0015405;GO:0003674;GO:0043492;GO:0006810;GO:0032555;GO:0051234;GO:0042626;GO:0051179;GO:0008150;GO:0030554;GO:0016887;GO:0022804;GO:0005886;GO:0033231;GO:1901265;GO:0071702;GO:0042623;GO:0005575;GO:0036094;GO:0017076;GO:0097159;GO:0015399;GO:0044425;GO:0016020;GO:0016817;GO:0005524;GO:…	-	PF19055;PF00005;PF01061;PF08370	3GCIM	Q	sp|Q7PC83|AB41G_ARATH ABC transporter G family member 41 OS=Arabidopsis thaliana OX=3702 GN=ABCG41 PE=2 SV=1	CAA7017297.1 unnamed protein product [Microthlaspi erraticum]
TRINITY_DN10248_c0_g4	1028	GO:0006810;GO:0032555;GO:0003674;GO:0043492;GO:0008150;GO:0051179;GO:0016887;GO:0030554;GO:0051234;GO:0042626;GO:0003824;GO:0016818;GO:0043167;GO:0031224;GO:0015405;GO:0055085;GO:0032559;GO:0016462;GO:0042623;GO:0005575;GO:0017076;GO:0036094;GO:0044425;GO:0097159;GO:0015399;GO:0005886;GO:0022804;GO:1901265;GO:0005623;GO:0005488;GO:0044464;GO:0071944;GO:0000166;GO:0035639;GO:0097367;GO:0016020;GO:…	-	PF14510;PF00005	3GCIM	Q	sp|Q7PC83|AB41G_ARATH ABC transporter G family member 41 OS=Arabidopsis thaliana OX=3702 GN=ABCG41 PE=2 SV=1	XP_024005153.1 ABC transporter G family member 41 [Eutrema salsugineum]
TRINITY_DN10248_c1_g1	4629	GO:0032502;GO:0000166;GO:0071944;GO:0005488;GO:0044464;GO:0005623;GO:0097367;GO:0035639;GO:0042335;GO:0016020;GO:0016817;GO:0005215;GO:0005524;GO:0043168;GO:0032553;GO:0006855;GO:0022857;GO:0017111;GO:0016021;GO:1901363;GO:0050896;GO:0008144;GO:0042221;GO:0007275;GO:0016787;GO:0003674;GO:0043492;GO:0032555;GO:0006810;GO:0042626;GO:0051234;GO:0032501;GO:0030554;GO:0016887;GO:0008150;GO:0051179;GO:…	-	PF01061;PF08370;PF14510;PF19055;PF00005	3HRBJ	Q	sp|O81016|AB32G_ARATH ABC transporter G family member 32 OS=Arabidopsis thaliana OX=3702 GN=ABCG32 PE=1 SV=1	XP_006295470.1 ABC transporter G family member 32 [Capsella rubella] &gt;EOA28368.1 hypothetical protein CARUB_v10024573mg [Capsella rubella]
TRINITY_DN102494_c0_g1	466	-	-	-	-	-	-	-
TRINITY_DN10249_c0_g1	3798	GO:0071704;GO:0036211;GO:0035639;GO:0097367;GO:0016301;GO:0044464;GO:0005623;GO:0006796;GO:0005488;GO:0000166;GO:0071944;GO:0044237;GO:0043168;GO:0005524;GO:0016740;GO:0016020;GO:0006793;GO:0016021;GO:1901363;GO:0006807;GO:0032553;GO:0006468;GO:0004672;GO:0009987;GO:0008144;GO:0008152;GO:0140096;GO:0016772;GO:0030554;GO:0008150;GO:1901564;GO:0032555;GO:0003674;GO:0032559;GO:0006464;GO:0003824;GO:…	-	PF08263;PF07714;PF13855;PF13516;PF00560	3HS2R	T	sp|C0LGQ9|GHR1_ARATH LRR receptor-like serine/threonine-protein kinase GHR1 OS=Arabidopsis thaliana OX=3702 GN=GHR1 PE=1 SV=2	XP_024005135.1 probable LRR receptor-like serine/threonine-protein kinase At4g20940 [Eutrema salsugineum] &gt;XP_024005136.1 probable LRR receptor-like serine/threonine-protein kinase At4g20940 [Eutrema salsugineum] &gt;XP_024005137.1 probable LRR receptor-like serine/threonine-protein kinase At4g20940 [Eutrema salsugineum] &gt;XP_024005138.1 probable LRR receptor-like serine/threonine-protein ki…
TRINITY_DN1024_c0_g1	1290	-	-	-	-	-	sp|Q3E811|RRT15_YEAST Regulator of rDNA transcription protein 15 OS=Saccharomyces cerevisiae (strain ATCC 204508 / S288c) OX=559292 GN=RRT15 PE=3 SV=1	PHT24766.1 hypothetical protein CQW23_35562 [Capsicum baccatum]
TRINITY_DN102500_c0_g1	506	-	-	-	-	-	-	-
TRINITY_DN102501_c0_g1	515	-	-	-	-	-	-	-
TRINITY_DN102502_c0_g1	403	-	-	-	-	-	-	-
TRINITY_DN102505_c0_g1	332	GO:0009506;GO:0005911;GO:0044249;GO:0005515;GO:0008652;GO:0017076;GO:1901605;GO:0009058;GO:0003824;GO:0030054;GO:0044238;GO:0005622;GO:0046394;GO:0032555;GO:0006972;GO:1901576;GO:0008150;GO:1901564;GO:0030554;GO:0044444;GO:0017144;GO:0006529;GO:0009066;GO:0050896;GO:0042803;GO:0009416;GO:0044424;GO:0009987;GO:0016053;GO:0006807;GO:0032553;GO:0032787;GO:0016874;GO:1901363;GO:0044283;GO:0070982;GO:…	K01953	PF13537	44RCV	E	sp|P22106|ASNB_ECOLI Asparagine synthetase B [glutamine-hydrolyzing] OS=Escherichia coli (strain K12) OX=83333 GN=asnB PE=1 SV=3	XP_024376778.1 asparagine synthetase [glutamine-hydrolyzing] 2-like [Physcomitrium patens] &gt;PNR53942.1 hypothetical protein PHYPA_007617 [Physcomitrium patens]
TRINITY_DN102507_c0_g1	395	-	-	-	-	-	-	-
TRINITY_DN102509_c0_g1	321	-	-	-	-	-	-	-
TRINITY_DN10250_c0_g1	2071	GO:0032200;GO:0044427;GO:1901990;GO:0043233;GO:0042592;GO:0035556;GO:0061982;GO:0048285;GO:0005488;GO:0044464;GO:0005623;GO:0043231;GO:0044451;GO:0051276;GO:0032508;GO:0090304;GO:0007093;GO:0031981;GO:0071704;GO:1901988;GO:0098687;GO:0005694;GO:0048519;GO:0006139;GO:0000075;GO:0008152;GO:0008134;GO:0104004;GO:0007165;GO:0051726;GO:0044454;GO:0006302;GO:0071103;GO:0022414;GO:0051321;GO:1901991;GO:…	K10867	-	3HS3I	L	sp|Q0H8D7|NBS1_ARATH Nijmegen breakage syndrome 1 protein OS=Arabidopsis thaliana OX=3702 GN=NBS1 PE=1 SV=1	XP_020888064.1 nijmegen breakage syndrome 1 protein [Arabidopsis lyrata subsp. lyrata] &gt;EFH58505.1 hypothetical protein ARALYDRAFT_477508 [Arabidopsis lyrata subsp. lyrata]
TRINITY_DN102510_c0_g1	306	-	K03124	PF08271	34I2P	K	sp|P48513|TF2B_SOYBN Transcription initiation factor IIB OS=Glycine max OX=3847 GN=TFIIB1 PE=2 SV=1	KAF8063772.1 cabII-1 [Scenedesmus sp. PABB004]
TRINITY_DN102514_c0_g1	566	-	-	-	-	-	-	-
TRINITY_DN102517_c0_g1	364	-	-	-	-	-	-	-
TRINITY_DN102520_c0_g1	388	-	-	-	-	-	-	-
TRINITY_DN102521_c0_g1	341	GO:0044424;GO:0009987;GO:0006508;GO:0008152;GO:0016787;GO:0008235;GO:0043170;GO:0043169;GO:0019538;GO:0043412;GO:0140096;GO:0070011;GO:0044260;GO:0006807;GO:0005737;GO:0005575;GO:0004177;GO:0008233;GO:0005622;GO:0046872;GO:0006464;GO:0044237;GO:0044238;GO:0044267;GO:0043167;GO:0003824;GO:0031365;GO:0071704;GO:0008150;GO:1901564;GO:0036211;GO:0008238;GO:0003674;GO:0008237;GO:0005623;GO:0044464;GO:…	K01265	-	4JN8K	J	sp|Q3ZC89|MAP2_BOVIN Methionine aminopeptidase 2 OS=Bos taurus OX=9913 GN=METAP2 PE=2 SV=1	XP_035540143.1 methionine aminopeptidase 2B-like isoform X3 [Juglans regia]
TRINITY_DN102524_c0_g1	345	GO:0042133;GO:0044444;GO:0017144;GO:0043226;GO:1901564;GO:0008150;GO:0044282;GO:0019464;GO:0009507;GO:0005960;GO:0005739;GO:0042737;GO:0005634;GO:0043436;GO:0005622;GO:0065008;GO:0044248;GO:0044238;GO:1902494;GO:0032991;GO:1901605;GO:0006082;GO:0009579;GO:0009069;GO:0005575;GO:0006520;GO:0009536;GO:1990204;GO:0043227;GO:0019752;GO:1901575;GO:0006544;GO:0071704;GO:0046395;GO:0044281;GO:0005623;GO:…	K02437	PF01597	3GC7D	E	sp|Q9K786|GCSH_ALKHC Glycine cleavage system H protein OS=Alkalihalobacillus halodurans (strain ATCC BAA-125 / DSM 18197 / FERM 7344 / JCM 9153 / C-125) OX=272558 GN=gcvH PE=3 SV=1	XP_024382051.1 uncharacterized protein LOC112285444 [Physcomitrium patens] &gt;PNR49758.1 hypothetical protein PHYPA_011654 [Physcomitrium patens]
TRINITY_DN102526_c0_g1	506	GO:0044444;GO:0043226;GO:0043232;GO:0008150;GO:1901564;GO:1901576;GO:0080090;GO:0030234;GO:0009059;GO:0005622;GO:0032270;GO:0045860;GO:0031323;GO:0044391;GO:0051347;GO:0044238;GO:0006414;GO:0043043;GO:0009058;GO:0019222;GO:0044260;GO:1990904;GO:0005840;GO:0030295;GO:0005844;GO:0044249;GO:0022625;GO:0043227;GO:0042325;GO:0010604;GO:0065009;GO:0005886;GO:0044093;GO:0003735;GO:0051174;GO:0044445;GO:…	K02942	PF00428	3M0PM	J	sp|P08570|RLA1_DROME 60S acidic ribosomal protein P1 OS=Drosophila melanogaster OX=7227 GN=RpLP1 PE=1 SV=2	XP_030537011.1 60S acidic ribosomal protein P1-like [Rhodamnia argentea]
TRINITY_DN102527_c0_g1	306	-	-	-	-	-	-	-
TRINITY_DN102528_c0_g1	311	-	-	-	-	-	-	-
TRINITY_DN102529_c0_g1	414	-	-	-	-	-	-	EFH64612.1 hypothetical protein ARALYDRAFT_893970 [Arabidopsis lyrata subsp. lyrata]
TRINITY_DN10252_c0_g1	339	GO:0051641;GO:0005737;GO:0031984;GO:0072596;GO:0016021;GO:0034357;GO:0015031;GO:0043231;GO:0005488;GO:0005623;GO:0044464;GO:0044743;GO:0044085;GO:0070208;GO:0006612;GO:0065003;GO:0042886;GO:0016020;GO:0045036;GO:0005215;GO:0045038;GO:0009536;GO:0005575;GO:0009579;GO:0050793;GO:0042651;GO:0061024;GO:0050789;GO:0090342;GO:0070206;GO:0031976;GO:0019904;GO:0006810;GO:0003674;GO:0051179;GO:0016043;GO:…	K03217	-	3HNBZ	OU	sp|Q8LBP4|ALB3_ARATH Inner membrane protein ALBINO3, chloroplastic OS=Arabidopsis thaliana OX=3702 GN=ALB3 PE=1 SV=2	XP_006294177.1 inner membrane protein ALBINO3, chloroplastic [Capsella rubella] &gt;EOA27075.1 hypothetical protein CARUB_v10023172mg [Capsella rubella]
TRINITY_DN102535_c0_g1	365	-	-	-	-	-	-	-
TRINITY_DN102536_c0_g1	410	GO:2000060;GO:0048583;GO:0051338;GO:0043229;GO:0044237;GO:0044089;GO:0031344;GO:0002758;GO:0043933;GO:0060341;GO:0051960;GO:1903508;GO:0042742;GO:0071347;GO:1901360;GO:0043523;GO:0009896;GO:0001934;GO:0043067;GO:0090325;GO:0030522;GO:0007275;GO:0007399;GO:0019899;GO:0045595;GO:0042176;GO:0140096;GO:0051173;GO:0031325;GO:0045935;GO:0032268;GO:0016874;GO:0051092;GO:0043408;GO:0097458;GO:0043122;GO:…	K10704	-	KOG0896	O	sp|Q9SJ44|UEV1C_ARATH Ubiquitin-conjugating enzyme E2 variant 1C OS=Arabidopsis thaliana OX=3702 GN=UEV1C PE=1 SV=1	KAE9590095.1 putative ubiquitin-conjugating enzyme/RWD [Lupinus albus]
TRINITY_DN102539_c0_g1	344	-	-	-	-	-	-	-
TRINITY_DN10253_c0_g1	2368	GO:0016787;GO:0008233;GO:0004175;GO:0006508;GO:0008152;GO:0008236;GO:0017171;GO:0003824;GO:0140096;GO:0043170;GO:0044238;GO:0019538;GO:0071704;GO:0008150;GO:1901564;GO:0005576;GO:0006807;GO:0005575;GO:0004252;GO:0003674;GO:0070011	-	PF00082;PF05922	3HYDR	O	sp|Q9FHA4|SBT19_ARATH Subtilisin-like protease SBT1.9 OS=Arabidopsis thaliana OX=3702 GN=SBT1.9 PE=2 SV=1	CAE6262873.1 unnamed protein product [Arabidopsis arenosa]
TRINITY_DN102542_c0_g1	302	GO:0043604;GO:0043227;GO:0044249;GO:0070013;GO:0043170;GO:0019538;GO:0009058;GO:0043043;GO:0044260;GO:1990904;GO:0031974;GO:0005840;GO:0005575;GO:0005622;GO:0044428;GO:0034645;GO:0036464;GO:0044238;GO:1901566;GO:0044267;GO:0044391;GO:0044422;GO:0032991;GO:0044446;GO:0043226;GO:0044271;GO:0043232;GO:0043603;GO:0044444;GO:0035770;GO:0008150;GO:1901564;GO:1901576;GO:0003674;GO:0005829;GO:0009059;GO:…	K02983	-	KOG0009	J	sp|P49689|RS30_ARATH 40S ribosomal protein S30 OS=Arabidopsis thaliana OX=3702 GN=RPS30A PE=3 SV=3	PSC72849.1 40S ribosomal S30 [Micractinium conductrix]
TRINITY_DN102544_c0_g1	411	-	-	-	-	-	-	-
TRINITY_DN102547_c0_g1	408	-	-	PF17963	-	-	-	-
TRINITY_DN102548_c0_g1	658	-	-	PF13912	3I100	S	sp|Q39266|ZFP7_ARATH Zinc finger protein 7 OS=Arabidopsis thaliana OX=3702 GN=ZFP7 PE=1 SV=1	CAA7033363.1 unnamed protein product [Microthlaspi erraticum]
TRINITY_DN10254_c0_g1	566	GO:0044260;GO:0006355;GO:0034654;GO:0003677;GO:0008356;GO:0009058;GO:0019222;GO:0048638;GO:1903506;GO:0048731;GO:0044249;GO:0043227;GO:0032774;GO:0030856;GO:1901576;GO:0080090;GO:0009059;GO:0051252;GO:0051301;GO:0006725;GO:0043226;GO:0045682;GO:0008150;GO:0032501;GO:0031323;GO:0044238;GO:0046872;GO:0005622;GO:0048856;GO:0003676;GO:0048364;GO:0051171;GO:0006807;GO:2000026;GO:0060255;GO:1901363;GO:…	-	-	3HN1Q	K	sp|Q700D2|IDD10_ARATH Zinc finger protein JACKDAW OS=Arabidopsis thaliana OX=3702 GN=JKD PE=1 SV=1	KAF2610602.1 hypothetical protein F2Q70_00007054 [Brassica cretica] &gt;KAF3506898.1 hypothetical protein F2Q69_00000114 [Brassica cretica] &gt;KAF3544483.1 hypothetical protein DY000_02000111 [Brassica cretica]
TRINITY_DN10254_c0_g2	572	GO:0043169;GO:0006139;GO:0010467;GO:0009889;GO:0008152;GO:0010556;GO:0010073;GO:0016070;GO:0045604;GO:0034641;GO:0009888;GO:0048507;GO:0051239;GO:0032502;GO:0005488;GO:0044464;GO:0051302;GO:0005623;GO:0043231;GO:0090304;GO:0071704;GO:0043170;GO:0050789;GO:0099402;GO:1901362;GO:0019219;GO:0010468;GO:0031326;GO:2001141;GO:0048509;GO:0005575;GO:0097159;GO:0140110;GO:0019438;GO:0050793;GO:0043167;GO:…	-	-	3HN1Q	K	sp|Q700D2|IDD10_ARATH Zinc finger protein JACKDAW OS=Arabidopsis thaliana OX=3702 GN=JKD PE=1 SV=1	GFQ07459.1 zinc finger protein magpie [Phtheirospermum japonicum]
TRINITY_DN102551_c0_g1	358	-	-	-	-	-	-	-
TRINITY_DN102558_c0_g1	793	-	-	-	-	-	-	-
TRINITY_DN102562_c0_g1	399	GO:0045747;GO:0044238;GO:0023056;GO:0009966;GO:0008052;GO:0007422;GO:0046872;GO:0005622;GO:0060562;GO:0048856;GO:0022412;GO:0048563;GO:0048513;GO:0010647;GO:0043226;GO:1901981;GO:0032501;GO:0005886;GO:0002683;GO:0071840;GO:0043412;GO:0035120;GO:0007472;GO:0048707;GO:0030718;GO:0035220;GO:0003677;GO:0051241;GO:0051259;GO:0007611;GO:0048583;GO:0043229;GO:0044237;GO:0060582;GO:0051960;GO:0008593;GO:…	-	-	44NPG	O	-	-
TRINITY_DN102566_c0_g1	439	-	-	PF00072	-	-	sp|P9WGM2|PDTAR_MYCTO Probable transcriptional regulatory protein PdtaR OS=Mycobacterium tuberculosis (strain CDC 1551 / Oshkosh) OX=83331 GN=pdtaR PE=3 SV=1	KAF1855524.1 hypothetical protein Lal_00001050 [Lupinus albus]
TRINITY_DN10256_c0_g1	2281	GO:0048278;GO:0140029;GO:0046903;GO:0022406;GO:0051641;GO:0006887;GO:0015833;GO:0006904;GO:0071702;GO:0140056;GO:0008104;GO:0033036;GO:0015031;GO:0045184;GO:0009987;GO:0006810;GO:0051179;GO:0008150;GO:0016192;GO:0051234;GO:0042886;GO:0051640;GO:0032940;GO:0071705	K15292	PF00995	3HYAX	U	sp|Q9C5P7|SEC1A_ARATH Protein transport Sec1a OS=Arabidopsis thaliana OX=3702 GN=SEC1A PE=2 SV=3	XP_020868112.1 protein transport Sec1a isoform X2 [Arabidopsis lyrata subsp. lyrata]
TRINITY_DN10256_c0_g2	880	GO:0043603;GO:0044444;GO:0043226;GO:0044271;GO:0043232;GO:0008150;GO:1901564;GO:0003674;GO:1901576;GO:0009059;GO:0005622;GO:0034645;GO:0012505;GO:1901566;GO:0044267;GO:0031224;GO:0044238;GO:0044446;GO:0003824;GO:0044422;GO:0098588;GO:0032991;GO:0043043;GO:0009058;GO:0044431;GO:0044425;GO:0044260;GO:1990904;GO:0005575;GO:0005840;GO:0031985;GO:0005794;GO:0043604;GO:0044249;GO:0043227;GO:0019538;GO:…	K08679	-	3HMKP	M	sp|O81312|GAE3_ARATH UDP-glucuronate 4-epimerase 3 OS=Arabidopsis thaliana OX=3702 GN=GAE3 PE=2 SV=1	CAF2034446.1 unnamed protein product [Brassica napus]
TRINITY_DN102572_c0_g1	341	-	-	-	-	-	-	-
TRINITY_DN102573_c0_g1	303	-	-	-	-	-	-	-
TRINITY_DN102575_c0_g1	329	-	-	-	3GEIR	S	-	NP_001118536.1 helicase with zinc finger protein [Arabidopsis thaliana] &gt;AEC10693.1 helicase with zinc finger protein [Arabidopsis thaliana]
TRINITY_DN10257_c0_g1	463	GO:0004534;GO:0034641;GO:0022613;GO:0009893;GO:0071035;GO:0043169;GO:0048519;GO:0006139;GO:0010467;GO:0008152;GO:0004540;GO:0000967;GO:0016070;GO:0004518;GO:0044464;GO:0005623;GO:0005488;GO:0016071;GO:0043632;GO:0043231;GO:0044085;GO:1901575;GO:0090304;GO:0000966;GO:0071704;GO:0016896;GO:0048518;GO:0005575;GO:0097159;GO:0016796;GO:0008270;GO:0090503;GO:0043170;GO:0044270;GO:0016075;GO:0050789;GO:…	K12619	-	3HVQK	AL	sp|Q9FQ03|XRN3_ARATH 5&apos;-3&apos; exoribonuclease 3 OS=Arabidopsis thaliana OX=3702 GN=XRN3 PE=1 SV=1	XP_009128117.1 5&apos;-3&apos; exoribonuclease 3 isoform X1 [Brassica rapa]
TRINITY_DN102580_c0_g1	546	-	-	-	-	-	-	-
TRINITY_DN102582_c0_g1	484	GO:0005737;GO:0009642;GO:0099512;GO:0007165;GO:0042221;GO:0009889;GO:0070887;GO:0005509;GO:0051196;GO:2000082;GO:0043169;GO:0015630;GO:0051606;GO:0019932;GO:0043231;GO:0005623;GO:0005488;GO:0044464;GO:0010035;GO:0051239;GO:0035556;GO:0009605;GO:0016020;GO:0050793;GO:0009314;GO:0005575;GO:0044437;GO:0031326;GO:0030656;GO:0050789;GO:0098805;GO:0009646;GO:0007154;GO:0009628;GO:0003674;GO:0050794;GO:…	K02183	-	3HVF5	T	sp|P62200|CALM1_DAUCA Calmodulin-1/11/16 OS=Daucus carota OX=4039 GN=CAM-1 PE=2 SV=2	XP_017430045.1 PREDICTED: calmodulin-like [Vigna angularis] &gt;XP_020176961.1 calmodulin-1 [Aegilops tauschii subsp. strangulata] &gt;XP_037420733.1 calmodulin-1-like [Triticum dicoccoides] &gt;KAF7054047.1 hypothetical protein CFC21_061815 [Triticum aestivum] &gt;KAG2391029.1 Calmodulin-2 protein [Vigna angularis] &gt;KOM46702.1 hypothetical protein LR48_Vigan07g040600 [Vigna angularis] &gt;QGL…
TRINITY_DN102584_c0_g1	380	-	-	PF04193	-	-	sp|Q6NRS2|S66A2_XENLA Solute carrier family 66 member 2 OS=Xenopus laevis OX=8355 GN=slc66a2 PE=2 SV=1	-
TRINITY_DN102587_c0_g1	385	-	-	-	-	-	-	-
TRINITY_DN10258_c0_g1	801	-	K13984	PF00085	34P68	O	sp|Q91W90|TXND5_MOUSE Thioredoxin domain-containing protein 5 OS=Mus musculus OX=10090 GN=Txndc5 PE=1 SV=2	GBF96497.1 hypothetical protein Rsub_09839 [Raphidocelis subcapitata]
TRINITY_DN102595_c0_g1	322	-	-	-	-	-	-	-
TRINITY_DN10259_c0_g1	1955	GO:0006396;GO:0006139;GO:0010467;GO:0009889;GO:0010556;GO:0008152;GO:0009987;GO:0044424;GO:0032259;GO:0000154;GO:0016070;GO:0008169;GO:0016741;GO:0051171;GO:0005737;GO:0006807;GO:0060255;GO:1901363;GO:0034641;GO:0022613;GO:0009451;GO:0008649;GO:0008168;GO:0065007;GO:0006364;GO:0003723;GO:0043414;GO:0016740;GO:0001510;GO:0044237;GO:1901360;GO:0005488;GO:0044464;GO:0005623;GO:0042254;GO:0009383;GO:…	K03500	PF01189;PF01029	3HMF2	A	sp|P94464|RSMB_BACSU Probable ribosomal RNA small subunit methyltransferase B OS=Bacillus subtilis (strain 168) OX=224308 GN=rsmB PE=3 SV=2	NP_187924.2 NOL1/NOP2/sun family protein / antitermination NusB domain-containing protein [Arabidopsis thaliana] &gt;AAL60011.1 putative sun protein fmu [Arabidopsis thaliana] &gt;AAM51397.1 putative sun protein fmu [Arabidopsis thaliana] &gt;AEE75306.1 NOL1/NOP2/sun family protein / antitermination NusB domain-containing protein [Arabidopsis thaliana] &gt;BAE98415.1 putative sun (fmu) protein [A…
TRINITY_DN1025_c0_g1	2520	-	K06927	PF01902;PF01042	3HSZU	J	sp|Q9USQ7|DPH6_SCHPO Diphthine--ammonia ligase OS=Schizosaccharomyces pombe (strain 972 / ATCC 24843) OX=284812 GN=mug71 PE=1 SV=1	XP_006408185.1 diphthine--ammonia ligase [Eutrema salsugineum] &gt;ESQ49638.1 hypothetical protein EUTSA_v10020155mg [Eutrema salsugineum]
TRINITY_DN102602_c0_g1	332	-	-	-	-	-	-	-
TRINITY_DN102603_c0_g1	350	-	-	-	-	-	-	-
TRINITY_DN102605_c0_g1	309	GO:0097159;GO:0036094;GO:0005575;GO:0010033;GO:1901265;GO:0006508;GO:0043170;GO:0044257;GO:0019538;GO:0019787;GO:0003674;GO:0032559;GO:0004842;GO:0031224;GO:0043167;GO:0044267;GO:0061630;GO:0005783;GO:0016021;GO:0030163;GO:0005737;GO:0042221;GO:0008144;GO:0008152;GO:0071704;GO:0036211;GO:1901575;GO:0030433;GO:0043632;GO:0043231;GO:0016567;GO:0005488;GO:0005623;GO:0044464;GO:0005524;GO:0043168;GO:…	K04554	-	3GC02	O	sp|O42646|UBC6_SCHPO Ubiquitin-conjugating enzyme E2 6 OS=Schizosaccharomyces pombe (strain 972 / ATCC 24843) OX=284812 GN=ubc6 PE=2 SV=1	XP_023917611.1 ubiquitin-conjugating enzyme E2 6-like [Quercus suber]
TRINITY_DN102607_c0_g1	317	-	-	-	-	-	-	KAB8556631.1 hypothetical protein FH972_025666 [Carpinus fangiana]
TRINITY_DN10260_c0_g1	5155	GO:0003676;GO:0010629;GO:0005622;GO:0016604;GO:0046872;GO:1902494;GO:0003824;GO:0044238;GO:0031323;GO:0006259;GO:0008150;GO:0140098;GO:0043226;GO:0006725;GO:0098542;GO:0043232;GO:0006304;GO:0051252;GO:0009059;GO:0070918;GO:1901576;GO:0080090;GO:0032774;GO:0043227;GO:0006383;GO:0044249;GO:1903506;GO:0051707;GO:0043412;GO:0097747;GO:0009892;GO:0071310;GO:0019222;GO:0009058;GO:0003677;GO:1990234;GO:…	K16251	PF04997;PF00623;PF04998;PF04983	3HT2I	K	sp|Q5D869|NRPE1_ARATH DNA-directed RNA polymerase V subunit 1 OS=Arabidopsis thaliana OX=3702 GN=NRPE1 PE=1 SV=1	CAE6040230.1 unnamed protein product [Arabidopsis arenosa]
TRINITY_DN102613_c0_g1	381	-	-	-	-	-	-	-
TRINITY_DN102618_c0_g1	302	GO:0044248;GO:0031224;GO:0102483;GO:0044238;GO:0044446;GO:0003824;GO:0098588;GO:0044422;GO:0005622;GO:0016812;GO:0003674;GO:0046483;GO:0009628;GO:0009812;GO:0019439;GO:0044444;GO:0008422;GO:0043226;GO:0006725;GO:0008150;GO:1901564;GO:0044282;GO:0044270;GO:0098805;GO:0046415;GO:0006144;GO:0004553;GO:0005777;GO:0043227;GO:0005773;GO:0005575;GO:1901657;GO:0006082;GO:0044425;GO:0055086;GO:0046700;GO:…	-	-	3GEM1	G	-	-
TRINITY_DN10261_c0_g1	712	-	-	-	4JKQ8	U	-	-
TRINITY_DN102627_c0_g1	427	GO:0046907;GO:0015031;GO:0044424;GO:0009987;GO:0033036;GO:0097708;GO:0031984;GO:0008104;GO:0005737;GO:0051641;GO:0070727;GO:0015833;GO:0043229;GO:0006886;GO:0034622;GO:0042886;GO:0098791;GO:0016020;GO:0043933;GO:0016192;GO:0065003;GO:0044085;GO:0030276;GO:0044464;GO:0005488;GO:0005623;GO:0031410;GO:0043231;GO:0030135;GO:0005802;GO:0043227;GO:0034613;GO:0005794;GO:0005515;GO:0045184;GO:0071840;GO:…	-	-	4JHWR	S	sp|Q9C5H4|MTV1_ARATH Protein MODIFIED TRANSPORT TO THE VACUOLE 1 OS=Arabidopsis thaliana OX=3702 GN=MTV1 PE=1 SV=1	XP_034910879.1 protein MODIFIED TRANSPORT TO THE VACUOLE 1 isoform X2 [Populus alba]
TRINITY_DN10262_c0_g1	1655	-	-	PF01582	-	-	sp|F4I594|RLM1A_ARATH Disease resistance protein RML1A OS=Arabidopsis thaliana OX=3702 GN=RLM1A PE=3 SV=1	XP_010473633.2 PREDICTED: disease resistance protein RML1B-like isoform X1 [Camelina sativa]
TRINITY_DN10262_c0_g2	778	-	-	PF01582	3GXRH	T	sp|Q9C7X0|ADR2_ARATH Disease resistance protein ADR2 OS=Arabidopsis thaliana OX=3702 GN=ADR2 PE=2 SV=1	XP_020867629.1 disease resistance protein ADR2 [Arabidopsis lyrata subsp. lyrata]
TRINITY_DN102630_c0_g1	301	-	-	-	-	-	-	-
TRINITY_DN102631_c0_g1	402	-	-	-	-	-	-	-
TRINITY_DN10263_c0_g1	666	GO:0010646;GO:0044764;GO:0071310;GO:0019236;GO:0016310;GO:0019222;GO:0009967;GO:0044260;GO:0017076;GO:0006464;GO:0033554;GO:0032270;GO:0031323;GO:0043406;GO:0003824;GO:0030554;GO:1901564;GO:0008150;GO:0051286;GO:0032555;GO:0009987;GO:0044424;GO:0043934;GO:0050896;GO:1901363;GO:0048584;GO:0048869;GO:0032005;GO:0043940;GO:0048522;GO:0016740;GO:0031137;GO:1902531;GO:0000003;GO:0065007;GO:0051716;GO:…	-	PF00069	3HY4I	T	sp|Q9ZVP5|M3K18_ARATH Mitogen-activated protein kinase kinase kinase 18 OS=Arabidopsis thaliana OX=3702 GN=MAPKKK18 PE=1 SV=1	XP_019091420.1 PREDICTED: mitogen-activated protein kinase kinase kinase NPK1-like [Camelina sativa]
TRINITY_DN102640_c0_g1	487	GO:0008144;GO:0008152;GO:0016880;GO:1901265;GO:0097159;GO:1901363;GO:0016874;GO:0032553;GO:0006807;GO:0036094;GO:0016211;GO:0017076;GO:0016879;GO:0032559;GO:0005524;GO:0043168;GO:0043167;GO:0003824;GO:0035639;GO:0097367;GO:0030554;GO:0008150;GO:0000166;GO:0003674;GO:0004356;GO:0032555;GO:0005488	K01915	PF12437	2QQE3	S	sp|P15623|GLNA3_BACFR Glutamine synthetase OS=Bacteroides fragilis (strain YCH46) OX=295405 GN=glnA PE=1 SV=2	GHP09897.1 hypothetical protein PPROV_000863200 [Pycnococcus provasolii]
TRINITY_DN102641_c0_g1	450	GO:0044238;GO:0004674;GO:0044267;GO:0043167;GO:0003824;GO:0032559;GO:0005622;GO:0006464;GO:0050794;GO:0003674;GO:0005634;GO:0032555;GO:0043226;GO:0007154;GO:0030554;GO:1901564;GO:0008150;GO:0043170;GO:0019538;GO:0043412;GO:0050789;GO:1901265;GO:0043227;GO:0044260;GO:0017076;GO:0036094;GO:0005575;GO:0097159;GO:0016310;GO:0016773;GO:0051716;GO:0065007;GO:0016740;GO:0035556;GO:0043229;GO:0044237;GO:…	-	-	3HW7B	T	sp|Q9SUL7|CIPK4_ARATH CBL-interacting serine/threonine-protein kinase 4 OS=Arabidopsis thaliana OX=3702 GN=CIPK4 PE=1 SV=1	CAA7028129.1 unnamed protein product [Microthlaspi erraticum]
TRINITY_DN10264_c0_g1	2563	-	-	PF20160;PF07725	-	-	sp|F4KHH8|RPS6C_ARATH Disease resistance protein RPS6 OS=Arabidopsis thaliana OX=3702 GN=RPS6 PE=1 SV=1	CAF2041698.1 unnamed protein product [Brassica napus]
TRINITY_DN102650_c0_g1	543	-	-	-	-	-	-	-
TRINITY_DN102658_c0_g1	434	-	K03253	PF00076	34HAF	J	sp|Q9C5Z1|EIF3B_ARATH Eukaryotic translation initiation factor 3 subunit B OS=Arabidopsis thaliana OX=3702 GN=TIF3B1 PE=1 SV=1	KAF6251726.1 eukaryotic initiation factor [Scenedesmus sp. NREL 46B-D3]
TRINITY_DN10265_c0_g1	2012	-	-	PF12819	-	-	sp|C0LGG4|Y1518_ARATH Probable LRR receptor-like serine/threonine-protein kinase At1g51860 OS=Arabidopsis thaliana OX=3702 GN=At1g51860 PE=2 SV=2	CAE5959962.1 unnamed protein product [Arabidopsis arenosa]
TRINITY_DN10265_c0_g2	1650	-	-	PF12819;PF13855	-	-	sp|C0LGG4|Y1518_ARATH Probable LRR receptor-like serine/threonine-protein kinase At1g51860 OS=Arabidopsis thaliana OX=3702 GN=At1g51860 PE=2 SV=2	CAE5959962.1 unnamed protein product [Arabidopsis arenosa]
TRINITY_DN102660_c0_g1	378	-	-	-	-	-	-	-
TRINITY_DN102662_c0_g1	335	GO:0071944;GO:1902905;GO:0030833;GO:0030029;GO:0005623;GO:0044464;GO:0005488;GO:1901879;GO:0010638;GO:0090066;GO:0016020;GO:0007010;GO:0065007;GO:0031334;GO:0044089;GO:0051495;GO:0030837;GO:0006996;GO:0008064;GO:0110053;GO:0033043;GO:1901880;GO:0048518;GO:0051015;GO:0031333;GO:0043244;GO:0048522;GO:0030036;GO:0032272;GO:0016021;GO:0032535;GO:0010639;GO:0030834;GO:0048519;GO:0044877;GO:0009987;GO:…	-	-	4JE6A	TZ	-	XP_021975554.1 formin-like protein 1 isoform X1 [Helianthus annuus]
TRINITY_DN102665_c0_g1	784	-	-	-	-	-	-	-
TRINITY_DN102667_c0_g1	401	-	-	-	3G8ZK	S	-	KAG4963016.1 hypothetical protein JHK86_039884 [Glycine max] &gt;KAG5110467.1 hypothetical protein JHK82_039690 [Glycine max]
TRINITY_DN10266_c0_g1	542	-	-	-	-	-	-	-
TRINITY_DN10266_c0_g2	403	-	-	-	-	-	-	-
TRINITY_DN10266_c0_g3	405	-	-	-	-	-	-	-
TRINITY_DN102673_c0_g1	383	-	-	-	4JU66	S	-	KAF6266607.1 hypothetical protein COO60DRAFT_5721 [Scenedesmus sp. NREL 46B-D3]
TRINITY_DN102678_c0_g1	325	-	-	-	3HR4P	O	-	XP_010413284.1 PREDICTED: nodal modulator 3-like [Camelina sativa]
TRINITY_DN10267_c0_g1	304	GO:0035639;GO:0097367;GO:0044255;GO:0000166;GO:0044281;GO:0009746;GO:0006720;GO:0006950;GO:0016301;GO:0010648;GO:0016740;GO:1902531;GO:0010039;GO:0006629;GO:0043229;GO:0044237;GO:0048583;GO:0065007;GO:0044283;GO:0051716;GO:0008299;GO:0036293;GO:0006793;GO:0032870;GO:1901363;GO:0009968;GO:0070297;GO:0009755;GO:0032553;GO:0006807;GO:2000026;GO:0016053;GO:0023052;GO:0044424;GO:0009987;GO:0071241;GO:…	-	-	3HQSX	T	-	XP_006290610.1 serine/threonine-protein kinase EDR1 [Capsella rubella] &gt;XP_023638192.1 serine/threonine-protein kinase EDR1 [Capsella rubella] &gt;EOA23508.1 hypothetical protein CARUB_v10016700mg [Capsella rubella]
TRINITY_DN102688_c0_g1	409	-	-	-	-	-	-	-
TRINITY_DN10268_c0_g1	333	-	K17398	-	3HRNK	S	sp|F4K4D6|PDP1_ARATH PWWP domain-containing protein 1 OS=Arabidopsis thaliana OX=3702 GN=PDP1 PE=1 SV=1	KFK26487.1 hypothetical protein AALP_AA8G255700 [Arabis alpina]
TRINITY_DN102692_c0_g1	335	-	-	-	-	-	-	-
TRINITY_DN102693_c0_g1	324	GO:0071944;GO:0006558;GO:0005488;GO:1902221;GO:0071704;GO:1901419;GO:0034260;GO:0016020;GO:0014070;GO:1902223;GO:0048518;GO:0031234;GO:0008219;GO:0098552;GO:0001664;GO:0005737;GO:0009787;GO:0009743;GO:0001882;GO:0030695;GO:0005783;GO:0098796;GO:0009870;GO:1905360;GO:0016247;GO:0043169;GO:0070887;GO:0104004;GO:0009741;GO:0019001;GO:0007165;GO:0009845;GO:0009642;GO:0051094;GO:0002253;GO:0050790;GO:…	K19729	PF00503	3GF8Z	DT	sp|P0CN97|GPA1_CRYNB Guanine nucleotide-binding protein subunit alpha OS=Cryptococcus neoformans var. neoformans serotype D (strain B-3501A) OX=283643 GN=GPA1 PE=3 SV=1	XP_023885898.1 guanine nucleotide-binding protein alpha-3 subunit-like [Quercus suber]
TRINITY_DN102694_c0_g1	477	-	-	-	-	-	-	-
TRINITY_DN102699_c0_g1	354	-	K02731	PF10584;PF00227	34GWX	O	sp|Q3ZBG0|PSA7_BOVIN Proteasome subunit alpha type-7 OS=Bos taurus OX=9913 GN=PSMA7 PE=1 SV=1	QDZ17788.1 alpha subunit D of 20S proteasome [Chloropicon primus]
TRINITY_DN10269_c0_g1	401	GO:0043228;GO:0015630;GO:0016787;GO:0099081;GO:0099512;GO:0008017;GO:0008144;GO:0009987;GO:0044424;GO:0007017;GO:0005874;GO:0032553;GO:0003777;GO:0017111;GO:1901363;GO:0043229;GO:0005524;GO:0043168;GO:0016817;GO:0099080;GO:0044464;GO:0005488;GO:0005623;GO:0005871;GO:0000166;GO:0005856;GO:0097367;GO:0035639;GO:0003774;GO:0015631;GO:0005875;GO:1901265;GO:0005515;GO:0017076;GO:0036094;GO:0006928;GO:…	K10406	-	3HYBB	Z	sp|F4J2M6|KN14L_ARATH Kinesin-like protein KIN-14L OS=Arabidopsis thaliana OX=3702 GN=KIN14L PE=3 SV=2	VVA97092.1 unnamed protein product [Arabis nemorensis]
TRINITY_DN1026_c0_g1	1939	GO:0045087;GO:0009620;GO:0002218;GO:1901698;GO:0044424;GO:0009987;GO:0009617;GO:0097659;GO:0050832;GO:0050896;GO:0048584;GO:0032870;GO:1901363;GO:0009682;GO:0009814;GO:0023052;GO:0051171;GO:0006807;GO:0010605;GO:2000026;GO:0009864;GO:0060255;GO:0009755;GO:0002252;GO:0048583;GO:0043229;GO:0044237;GO:0010243;GO:0009863;GO:0006351;GO:0050778;GO:0065007;GO:0051716;GO:0045892;GO:1900056;GO:0048831;GO:…	-	-	3HWEQ	K	sp|Q93WU8|WRK54_ARATH Probable WRKY transcription factor 54 OS=Arabidopsis thaliana OX=3702 GN=WRKY54 PE=1 SV=2	CAE6041729.1 unnamed protein product [Arabidopsis arenosa]
TRINITY_DN102700_c0_g1	320	-	-	-	-	-	-	-
TRINITY_DN102702_c0_g1	301	-	-	-	-	-	-	-
TRINITY_DN102704_c0_g1	333	-	-	PF05255	34KUS	S	-	-
TRINITY_DN102705_c0_g1	310	GO:0034645;GO:0034660;GO:0005622;GO:0032559;GO:0003824;GO:0044238;GO:0043167;GO:0044267;GO:1901566;GO:0030554;GO:1901564;GO:0008150;GO:0140098;GO:0006725;GO:0044271;GO:0043603;GO:0043436;GO:0009059;GO:0032555;GO:0046483;GO:1901576;GO:0003674;GO:1901265;GO:0006420;GO:0044249;GO:0043604;GO:0016875;GO:0004814;GO:0019752;GO:0043170;GO:0019538;GO:0006082;GO:0009058;GO:0097159;GO:0043043;GO:0017076;GO:…	K01887	-	3HR18	J	sp|O23247|SYRM_ARATH Arginine--tRNA ligase, chloroplastic/mitochondrial OS=Arabidopsis thaliana OX=3702 GN=EMB1027 PE=1 SV=1	KFK38731.1 hypothetical protein AALP_AA3G153100 [Arabis alpina]
TRINITY_DN10270_c0_g1	1344	GO:0034641;GO:0006974;GO:0009314;GO:0044260;GO:0006807;GO:0005575;GO:0009987;GO:0044424;GO:0008152;GO:0043227;GO:0009416;GO:0006139;GO:0043170;GO:0050896;GO:0006725;GO:0090304;GO:0043226;GO:0071704;GO:0006259;GO:0008150;GO:0009411;GO:1901360;GO:0043231;GO:0006950;GO:0005634;GO:0046483;GO:0044464;GO:0005623;GO:0009628;GO:0005622;GO:0044237;GO:0043229;GO:0033554;GO:0010224;GO:0006281;GO:0051716;GO:…	K13728	-	3HV7E	D	sp|Q94FL5|REV7_ARATH DNA polymerase zeta processivity subunit OS=Arabidopsis thaliana OX=3702 GN=REV7 PE=2 SV=1	XP_010476772.1 PREDICTED: DNA polymerase zeta processivity subunit-like [Camelina sativa]
TRINITY_DN102710_c0_g1	467	-	-	-	-	-	-	-
TRINITY_DN102711_c0_g1	323	-	-	-	-	-	-	-
TRINITY_DN102714_c0_g1	522	-	-	-	-	-	-	-
TRINITY_DN102715_c0_g1	328	GO:0044464;GO:0005623;GO:0005575;GO:0005737;GO:0005622;GO:0044424	-	PF00838	3G8EY	DZ	sp|Q10344|TCTP_SCHPO Translationally-controlled tumor protein homolog OS=Schizosaccharomyces pombe (strain 972 / ATCC 24843) OX=284812 GN=p23fy PE=1 SV=1	XP_023871922.1 translationally-controlled tumor protein homolog [Quercus suber]
TRINITY_DN102718_c0_g1	310	-	-	-	-	-	-	-
TRINITY_DN10271_c0_g1	2264	GO:0044425;GO:0098827;GO:0031984;GO:0005783;GO:0016021;GO:0005737;GO:0044432;GO:0005575;GO:0043227;GO:0044424;GO:0042175;GO:0043226;GO:0044444;GO:0043231;GO:0044464;GO:0005623;GO:0043229;GO:0005622;GO:0044422;GO:0044446;GO:0016020;GO:0031224;GO:0012505;GO:0005789	K18999	PF02453	3HY8E	S	sp|Q56X72|RTNLS_ARATH Reticulon-like protein B21 OS=Arabidopsis thaliana OX=3702 GN=RTNLB21 PE=2 SV=2	CAE6246639.1 unnamed protein product [Arabidopsis arenosa]
TRINITY_DN102722_c0_g1	362	-	-	-	-	-	-	-
TRINITY_DN102724_c0_g1	366	-	K20223	-	34H0T	UY	-	KAF6256069.1 hypothetical protein COO60DRAFT_148037 [Scenedesmus sp. NREL 46B-D3]
TRINITY_DN102727_c0_g1	391	-	K02958	-	3ICCS	J	sp|Q945U1|RS15_ELAOL 40S ribosomal protein S15 OS=Elaeis oleifera OX=80265 GN=RPS15 PE=2 SV=1	XP_031488926.1 40S ribosomal protein S15 [Nymphaea colorata] &gt;KAF3781034.1 40S ribosomal protein S15 [Nymphaea thermarum]
TRINITY_DN10272_c0_g1	463	-	-	-	-	-	-	-
TRINITY_DN102731_c0_g1	378	-	-	-	-	-	-	-
TRINITY_DN102732_c0_g1	526	GO:0005622;GO:0055085;GO:0098660;GO:0031967;GO:0031224;GO:0044422;GO:0006839;GO:0015103;GO:0044446;GO:0019866;GO:0043226;GO:0044444;GO:0051234;GO:0008150;GO:0051179;GO:0003674;GO:0005739;GO:0006810;GO:0009628;GO:0098656;GO:0043227;GO:0006811;GO:0044429;GO:0015318;GO:0006820;GO:0006817;GO:0031966;GO:0044425;GO:0098661;GO:0005575;GO:0043229;GO:0005215;GO:0009651;GO:0016020;GO:0015075;GO:0008509;GO:…	K15102	PF00153	3GEGJ	C	sp|P40614|MPCP_CAEEL Phosphate carrier protein, mitochondrial OS=Caenorhabditis elegans OX=6239 GN=F01G4.6 PE=2 SV=1	KAG5220638.1 Cu/Pi carrier [Salix suchowensis]
TRINITY_DN102735_c0_g1	318	GO:0005622;GO:0044446;GO:0003824;GO:0052866;GO:0044422;GO:0016791;GO:0016311;GO:0012505;GO:0005789;GO:0006650;GO:0031224;GO:0044238;GO:0030258;GO:0008150;GO:0044444;GO:0034596;GO:0043226;GO:0003674;GO:0043812;GO:0043227;GO:0052744;GO:0042175;GO:0016788;GO:0098827;GO:0044425;GO:0046486;GO:0005575;GO:0006629;GO:0043229;GO:0044237;GO:0046856;GO:0019637;GO:0046488;GO:0016020;GO:0071704;GO:0044255;GO:…	-	-	3HNZF	I	-	-
TRINITY_DN102737_c0_g1	342	-	-	-	-	-	-	-
TRINITY_DN102738_c0_g1	381	-	-	-	-	-	-	XP_023885868.1 NADH dehydrogenase [ubiquinone] 1 beta subcomplex subunit 8, mitochondrial-like [Quercus suber]
TRINITY_DN102748_c0_g1	354	-	-	-	-	-	-	-
TRINITY_DN102749_c0_g1	463	GO:0009653;GO:0005623;GO:0044464;GO:0009826;GO:0043231;GO:0032502;GO:0043229;GO:0009734;GO:0042592;GO:0051716;GO:0009719;GO:0065007;GO:0048878;GO:0048869;GO:0016874;GO:0010252;GO:0060560;GO:0032870;GO:0009733;GO:0023052;GO:0000902;GO:0005737;GO:0009755;GO:0007165;GO:0009725;GO:0009416;GO:0009987;GO:0044424;GO:0010279;GO:0042221;GO:0070887;GO:0050896;GO:0071365;GO:0016049;GO:0008150;GO:0044444;GO:…	-	-	3HMD8	S	-	-
TRINITY_DN10274_c0_g1	1449	GO:0060255;GO:0006807;GO:0048522;GO:0051171;GO:0090567;GO:1901363;GO:0000977;GO:0048869;GO:0001228;GO:0045935;GO:0031325;GO:0051173;GO:0097659;GO:0044424;GO:0009987;GO:0007275;GO:0001067;GO:1901360;GO:1903508;GO:2000112;GO:0048437;GO:0065007;GO:0006351;GO:0000976;GO:0043229;GO:0044237;GO:0000003;GO:0048510;GO:0006355;GO:0044260;GO:0045944;GO:0034654;GO:0009058;GO:0003677;GO:0019222;GO:0000981;GO:…	-	PF00320	3I0EK	K	sp|Q9ZPX0|GAT20_ARATH GATA transcription factor 20 OS=Arabidopsis thaliana OX=3702 GN=GATA20 PE=2 SV=2	CAA7022161.1 unnamed protein product [Microthlaspi erraticum]
TRINITY_DN10274_c1_g1	362	-	-	-	-	-	-	-
TRINITY_DN102753_c0_g1	402	GO:0032502;GO:0008150;GO:0048646;GO:0010252;GO:0009653;GO:0048878;GO:0065007;GO:0042592;GO:0048856;GO:1905393;GO:0065008	-	-	4JMZ8	S	sp|Q9LUB6|SNE_ARATH F-box protein SNE OS=Arabidopsis thaliana OX=3702 GN=SNE PE=1 SV=1	KAF8071234.1 VCX1 [Scenedesmus sp. PABB004]
TRINITY_DN10275_c2_g1	1585	-	K03231	PF03144;PF00009;PF03143	34H6Y	J	sp|P05303|EF1A2_DROME Elongation factor 1-alpha 2 OS=Drosophila melanogaster OX=7227 GN=eEF1alpha2 PE=2 SV=2	XP_030537677.1 elongation factor 1-alpha-like [Rhodamnia argentea] &gt;XP_030537798.1 elongation factor 1-alpha-like [Rhodamnia argentea]
TRINITY_DN10275_c2_g2	523	GO:0043043;GO:0097159;GO:0009058;GO:0008135;GO:0044260;GO:0005575;GO:0036094;GO:0017076;GO:0043604;GO:0044249;GO:1901265;GO:0019538;GO:0043170;GO:0001883;GO:0043603;GO:0005525;GO:0044271;GO:0003746;GO:0008150;GO:1901564;GO:0003674;GO:1901576;GO:0009059;GO:0032555;GO:0016462;GO:0005622;GO:0003676;GO:0034645;GO:0044267;GO:1901566;GO:0043167;GO:0044238;GO:0003824;GO:0006414;GO:0016818;GO:0001882;GO:…	K03231	-	3IG71	J	sp|P0CT31|EF1A1_DICDI Elongation factor 1-alpha OS=Dictyostelium discoideum OX=44689 GN=eef1a1 PE=1 SV=1	BAJ96087.1 predicted protein [Hordeum vulgare subsp. vulgare]
TRINITY_DN10275_c2_g3	417	-	K03231	PF00009	3GAB2	J	sp|Q07051|EF1A_EIMBO Elongation factor 1-alpha (Fragment) OS=Eimeria bovis OX=5803 PE=2 SV=1	ACL97366.1 elongation factor-1 alpha, partial [Parvocaulis pusillus]
TRINITY_DN102760_c0_g1	326	-	-	-	-	-	-	-
TRINITY_DN102761_c0_g1	341	-	-	-	-	-	-	-
TRINITY_DN102763_c0_g1	432	-	K06911	-	34HY6	S	sp|P58112|Y481_CAUVC Pirin-like protein CC_0481 OS=Caulobacter vibrioides (strain ATCC 19089 / CB15) OX=190650 GN=CC_0481 PE=3 SV=1	KAF6260846.1 RmlC-like cupin domain-containing protein [Scenedesmus sp. NREL 46B-D3]
TRINITY_DN102766_c0_g1	312	-	-	-	-	-	-	-
TRINITY_DN102769_c0_g1	302	-	-	-	-	-	-	-
TRINITY_DN10276_c0_g1	570	GO:0008092;GO:0016043;GO:0003674;GO:0003779;GO:0009555;GO:0048236;GO:0051017;GO:0051704;GO:0044446;GO:0044422;GO:0044267;GO:0006470;GO:0005575;GO:0048229;GO:0019538;GO:1903046;GO:0043170;GO:0036211;GO:0071704;GO:0015631;GO:0044085;GO:0005623;GO:0005488;GO:0006796;GO:0044464;GO:0032502;GO:0022414;GO:0051321;GO:0005737;GO:0003006;GO:0008152;GO:0019953;GO:0042578;GO:0015630;GO:1901564;GO:0008150;GO:…	-	-	3GBSB	S	sp|Q9C6S1|FH14_ARATH Formin-like protein 14 OS=Arabidopsis thaliana OX=3702 GN=FH14 PE=3 SV=3	EOA36656.1 hypothetical protein CARUB_v100119500mg, partial [Capsella rubella]
TRINITY_DN102770_c0_g1	324	GO:0034641;GO:0009141;GO:0016491;GO:0098796;GO:0005737;GO:0005747;GO:0008152;GO:0009259;GO:0098800;GO:0006139;GO:0043169;GO:0006753;GO:0006970;GO:0071704;GO:0009144;GO:0042773;GO:0045271;GO:0022900;GO:0043231;GO:0006163;GO:0044464;GO:0005488;GO:0006796;GO:0005623;GO:0010876;GO:0022904;GO:0016020;GO:0005746;GO:0019637;GO:0098803;GO:0009167;GO:0009117;GO:0042775;GO:0005575;GO:1990204;GO:0019915;GO:…	-	-	KOG3389	U	-	-
TRINITY_DN102771_c0_g1	333	-	K14544	-	3HPX2	J	-	XP_024005663.1 nucleolar protein 6 isoform X3 [Eutrema salsugineum]
[truncated: 58,184 more rows]
